# Supplementary material for: An Integrated Approach for the Analysis of Biological Pathways using Mixed Models
Source: PubMed Central journal article supplement (PMC2565842; doi:10.1371/journal.pgen.1000115), 2008-07-04

**GO\_0000018 : regulation of DNA recombination**

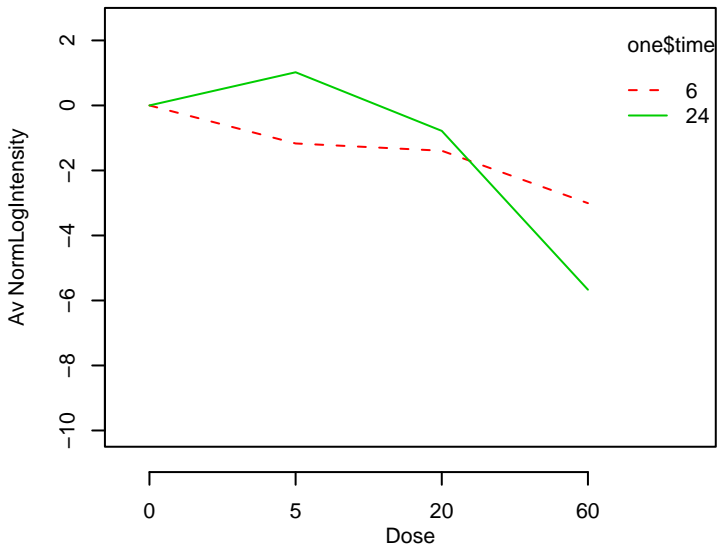

**GO\_0000038 : very-long-chain fatty acid metabolism**

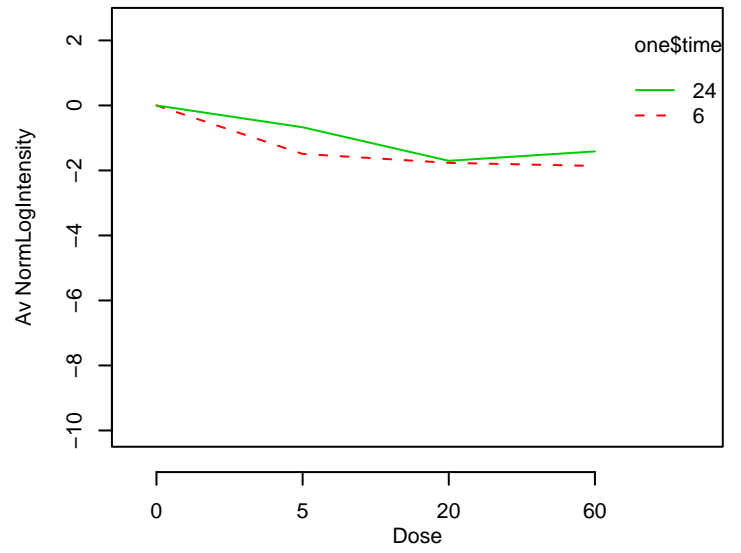

**GO\_0000041 : transition metal ion transport**

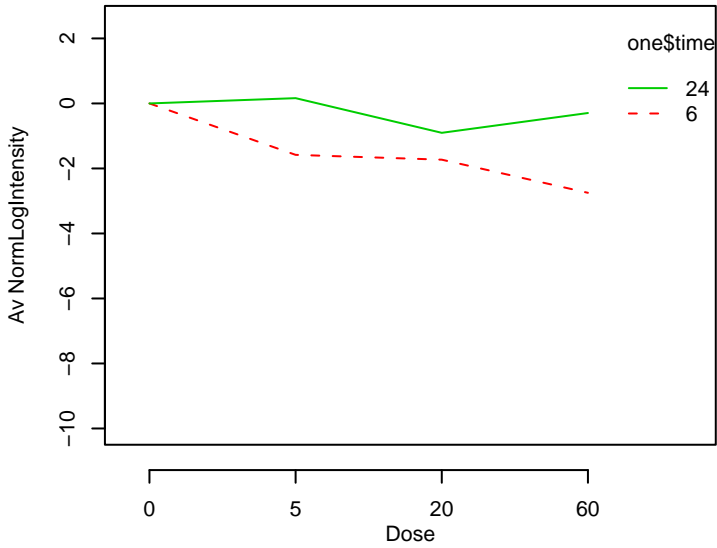

**GO\_0000045 : autophagic vacuole formation**

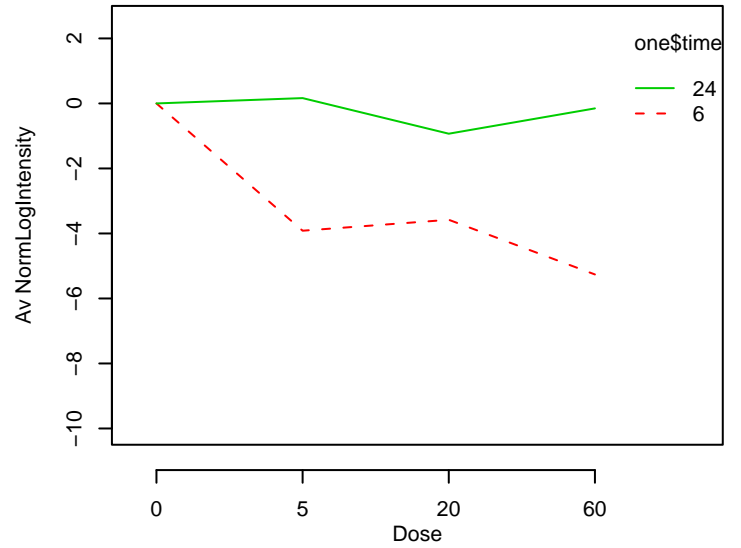

**GO\_0000050 : urea cycle**

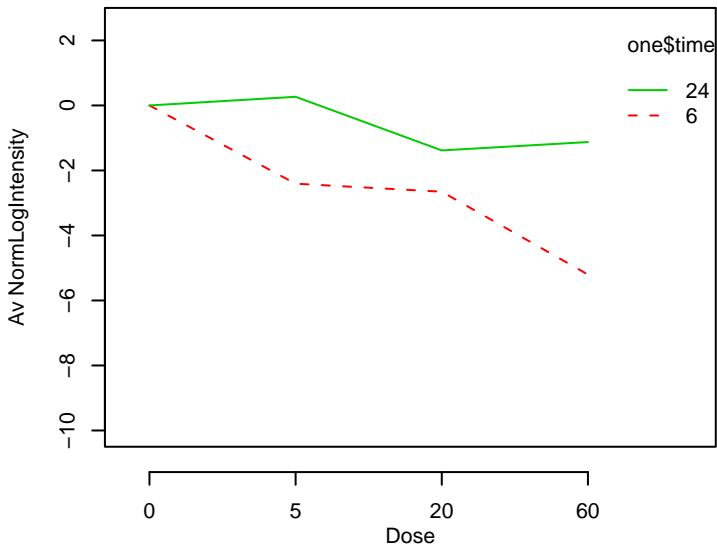

**GO\_0000051 : urea cycle intermediate metabolism**

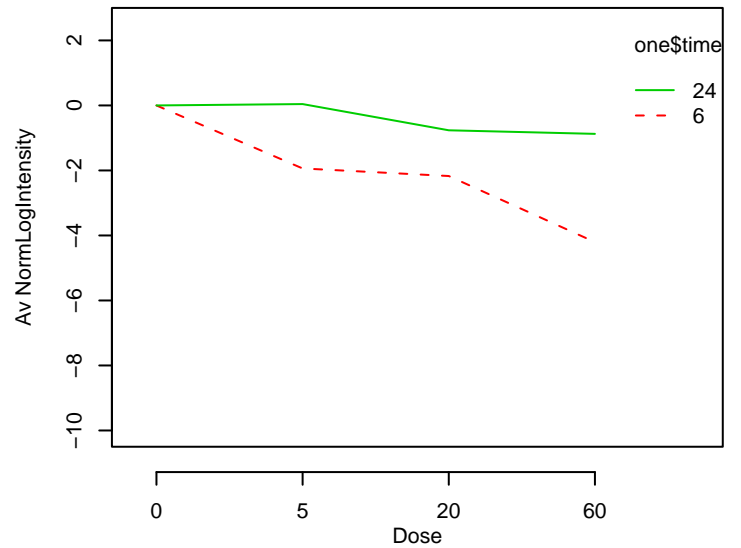

**GO\_000059 : protein import into nucleus\, docking**

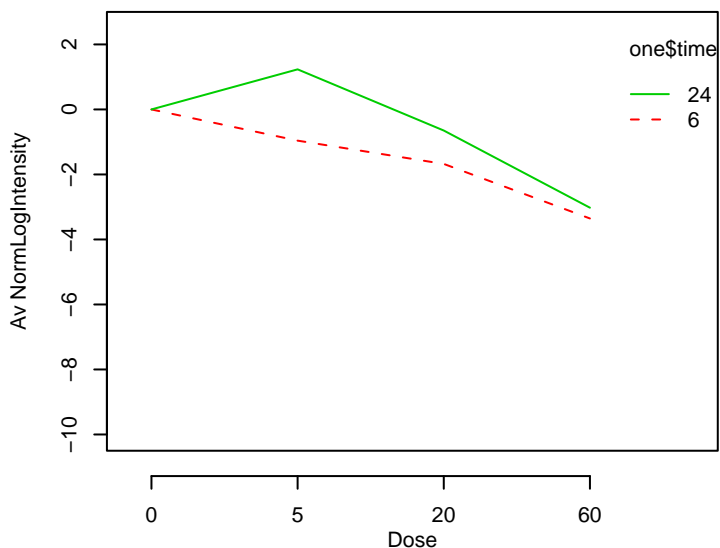

**GO\_000060 : protein import into nucleus\, translocation**

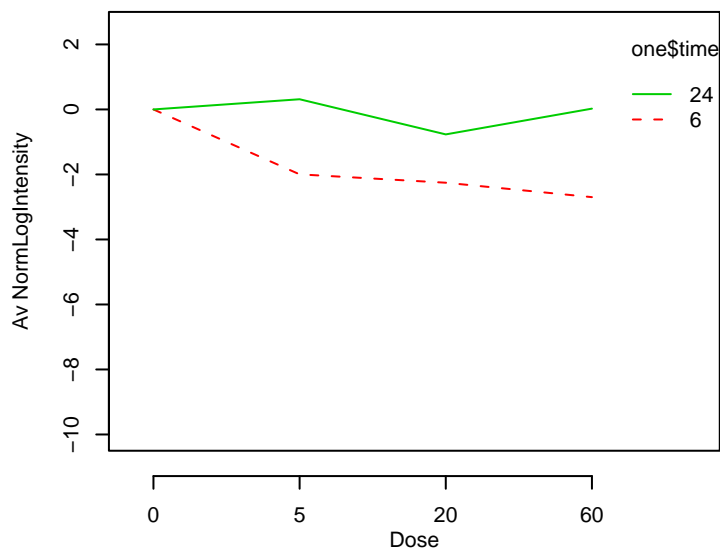

**GO\_000070 : mitotic sister chromatid segregation**

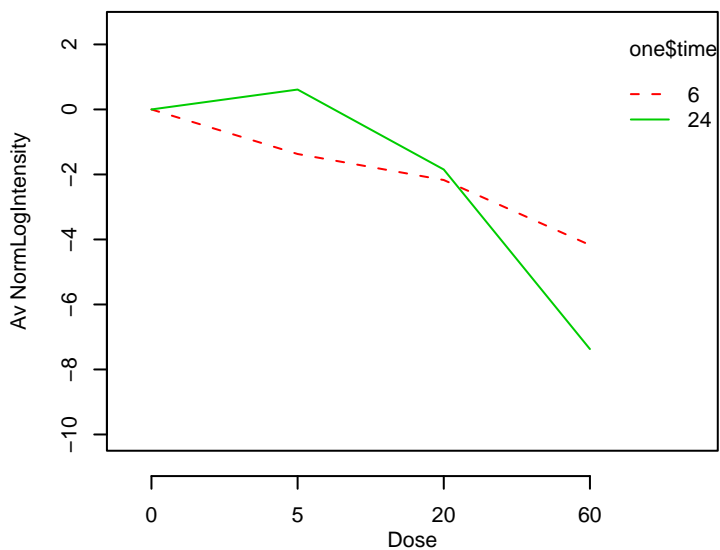

**GO\_000075 : cell cycle checkpoint**

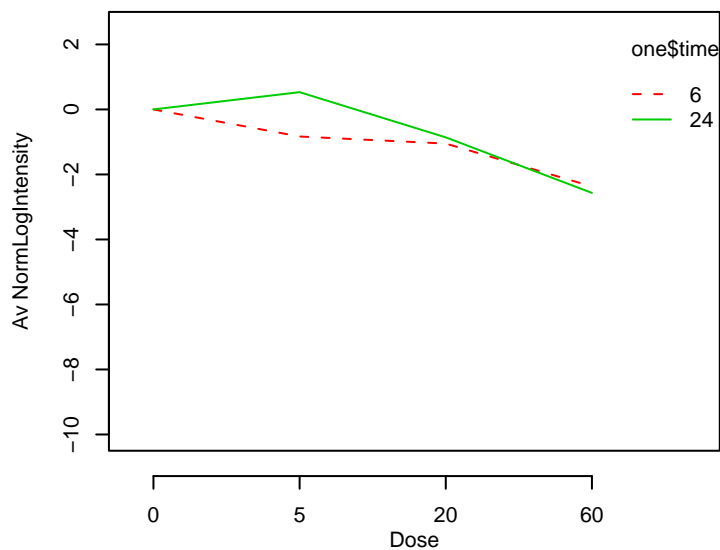

**GO\_000076 : DNA replication checkpoint**

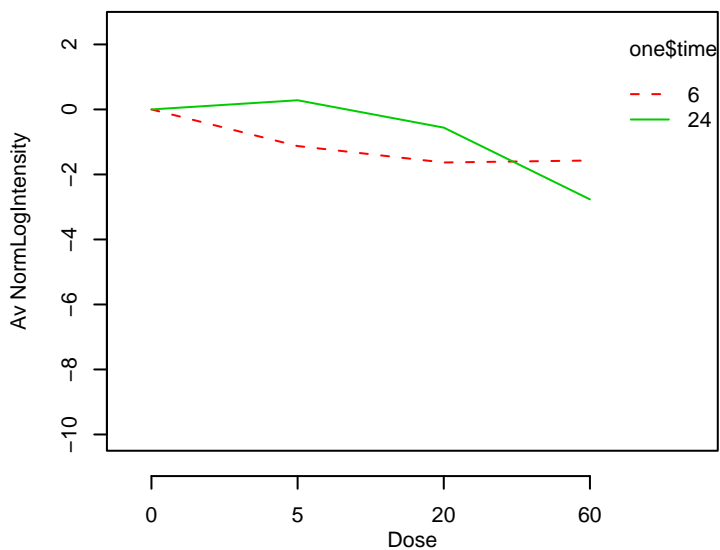

**GO\_000077 : DNA damage checkpoint**

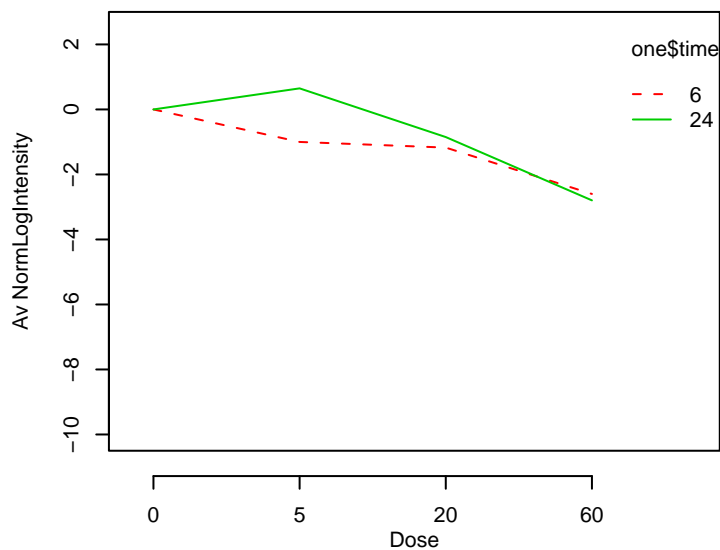

**GO\_0000079 : regulation of cyclin-dependent protein kinase**

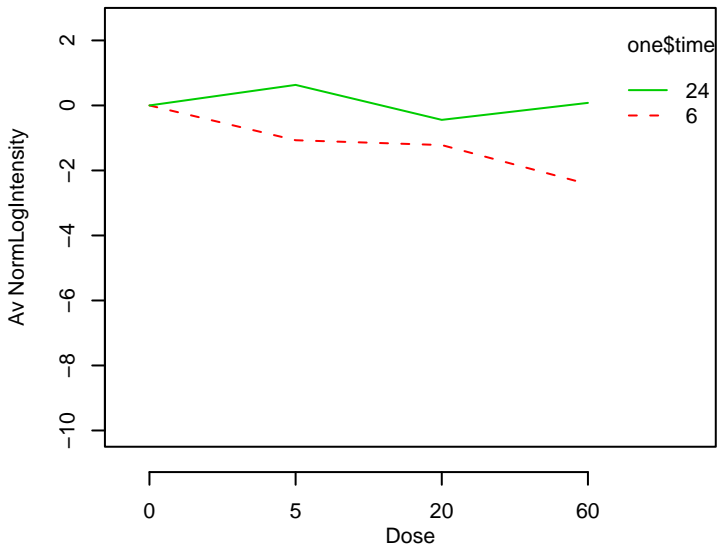

**GO\_0000080 : G1 phase of mitotic cell cycle**

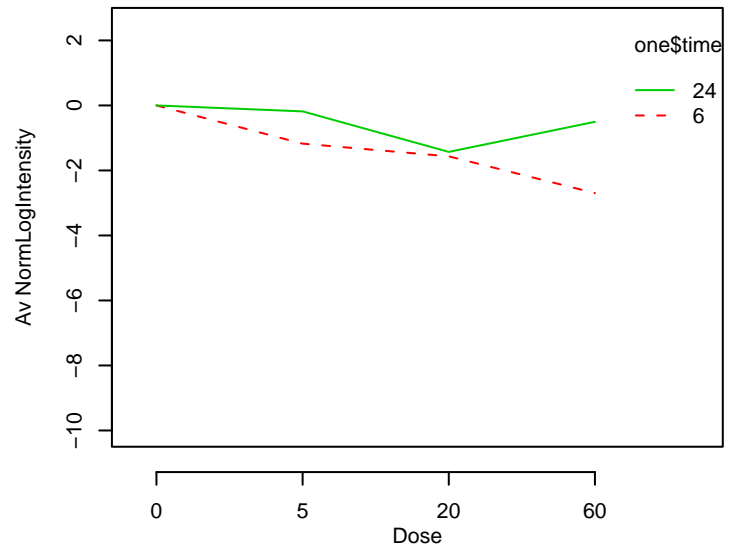

**GO\_0000082 : G1/S transition of mitotic cell cycle**

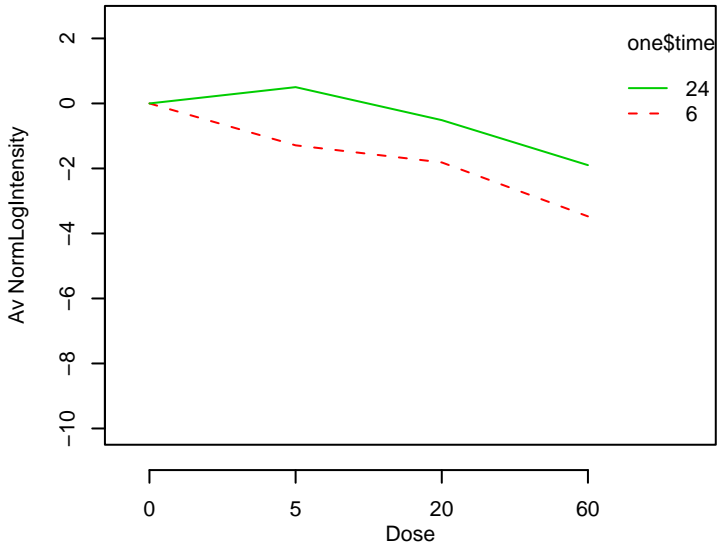

**GO\_0000084 : S phase of mitotic cell cycle**

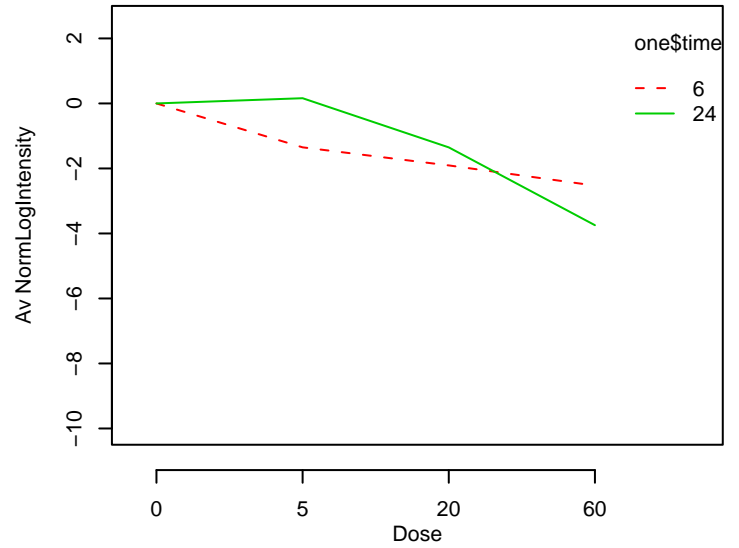

**GO\_0000085 : G2 phase of mitotic cell cycle**

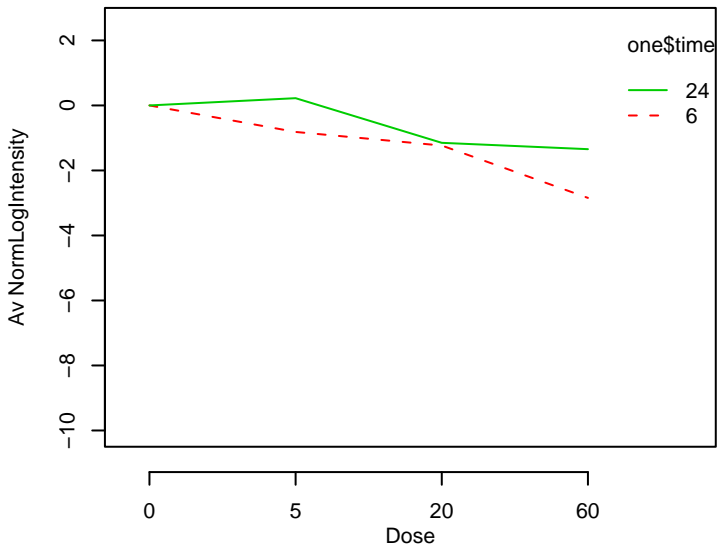

**GO\_0000086 : G2/M transition of mitotic cell cycle**

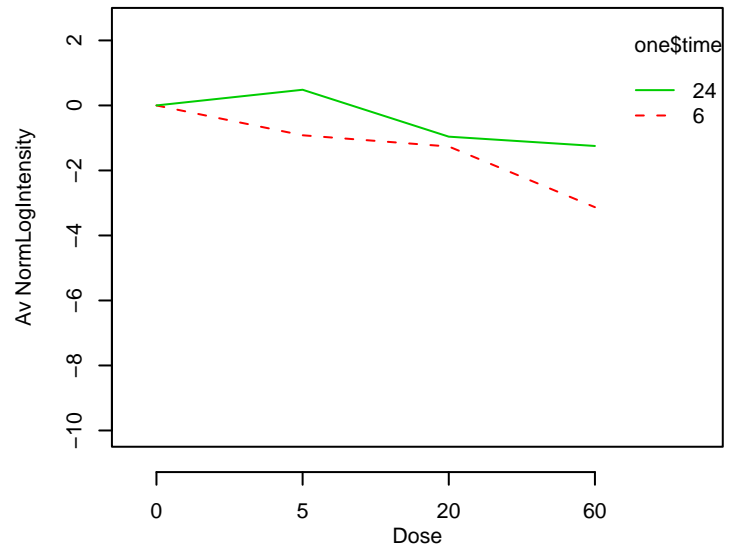

**GO\_0000087 : M phase of mitotic cell cycle**

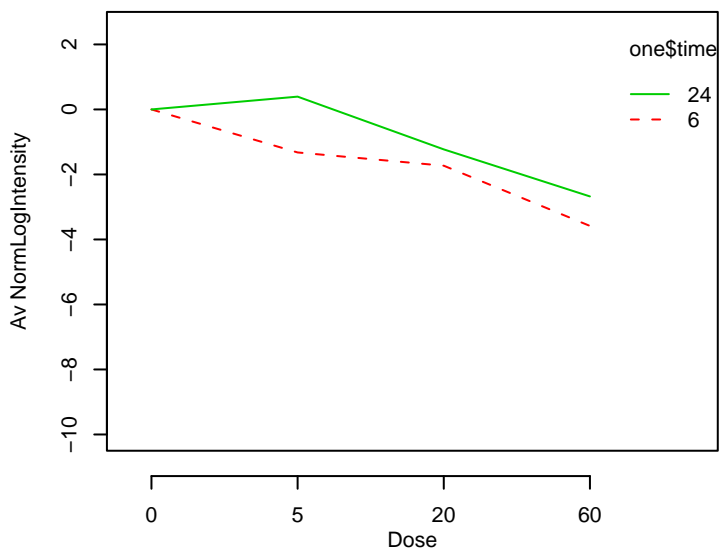

**GO\_0000090 : mitotic anaphase**

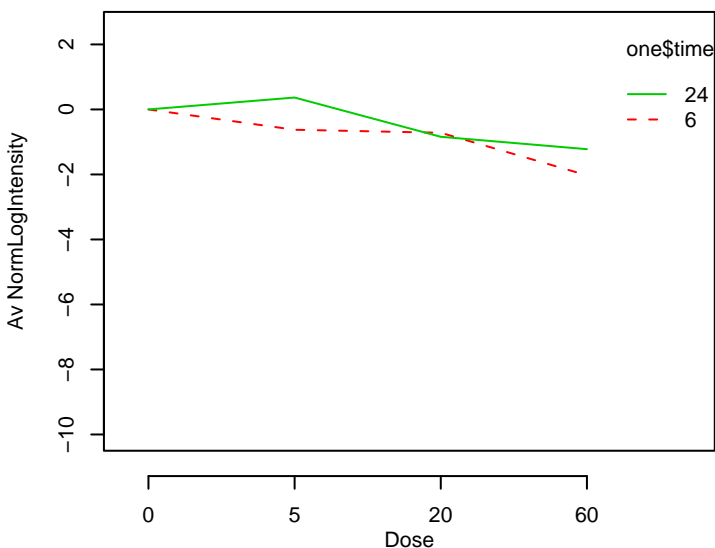

**GO\_0000096 : sulfur amino acid metabolism**

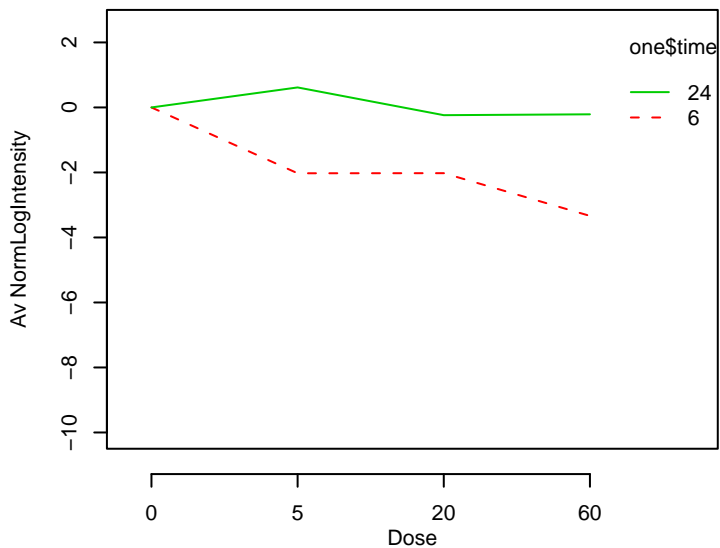

**GO\_0000097 : sulfur amino acid biosynthesis**

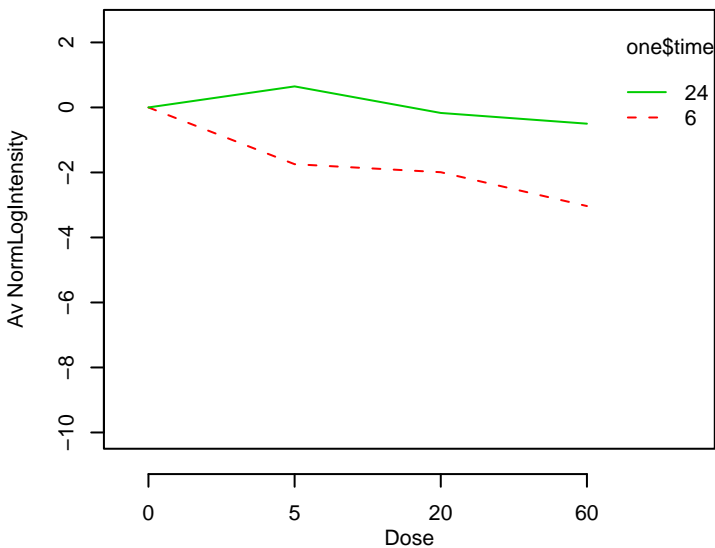

**GO\_0000122 : negative regulation of transcription from RNA )\_0000160 : two-component signal transduction system (phc**

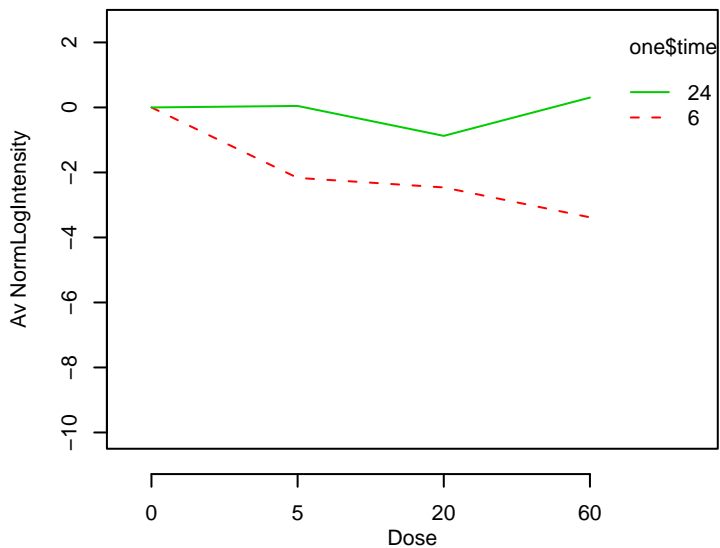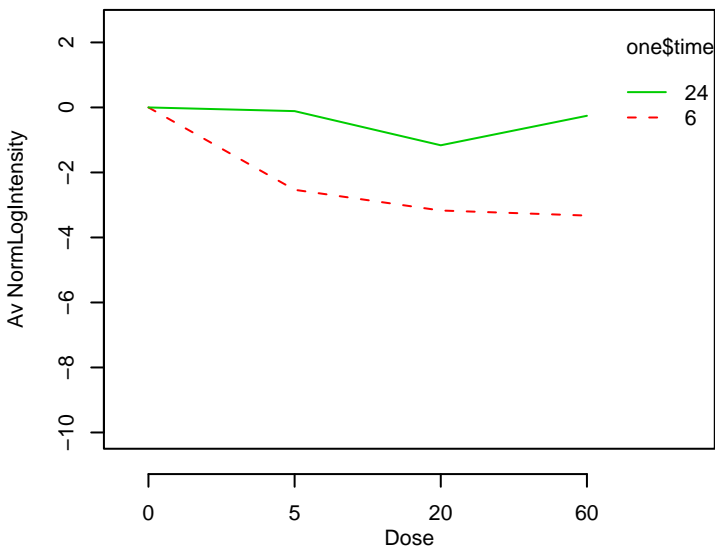

**GO\_0000165 : MAPKKK cascade**

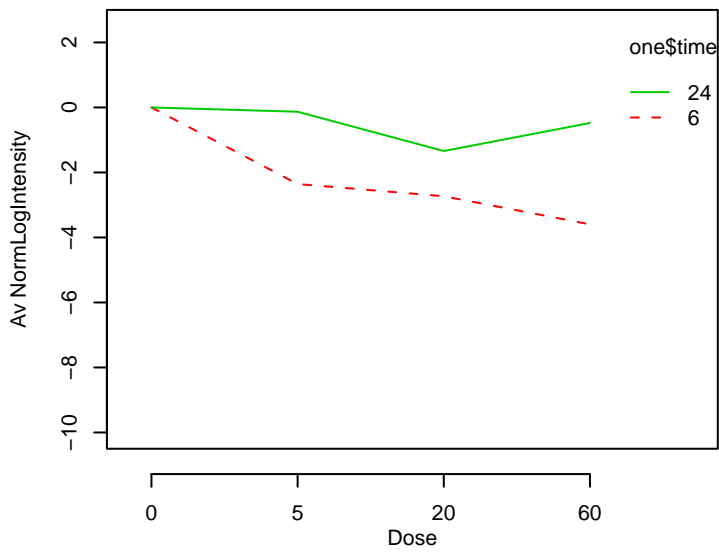

**GO\_0000184 : mRNA catabolism\, nonsense-mediated dec**

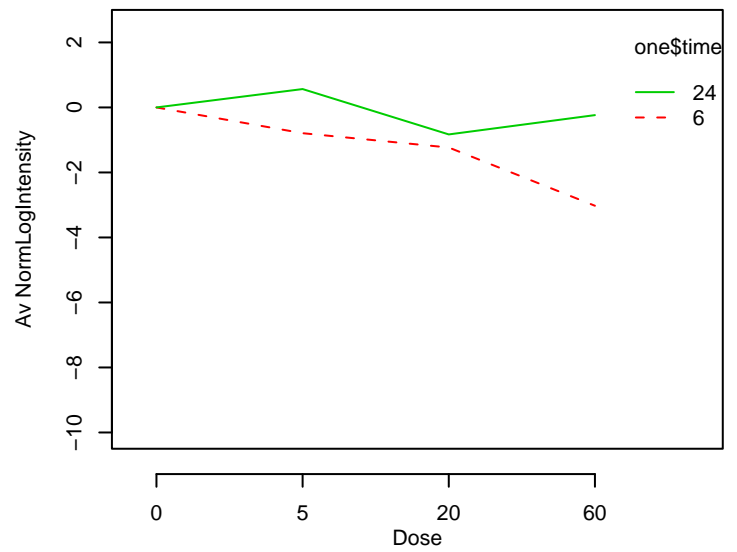

**GO\_0000185 : activation of MAPKKK activity**

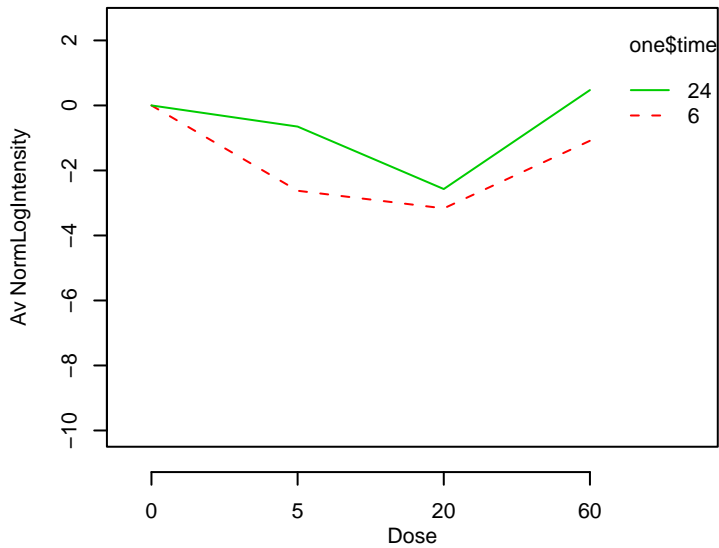

**GO\_0000186 : activation of MAPKK activity**

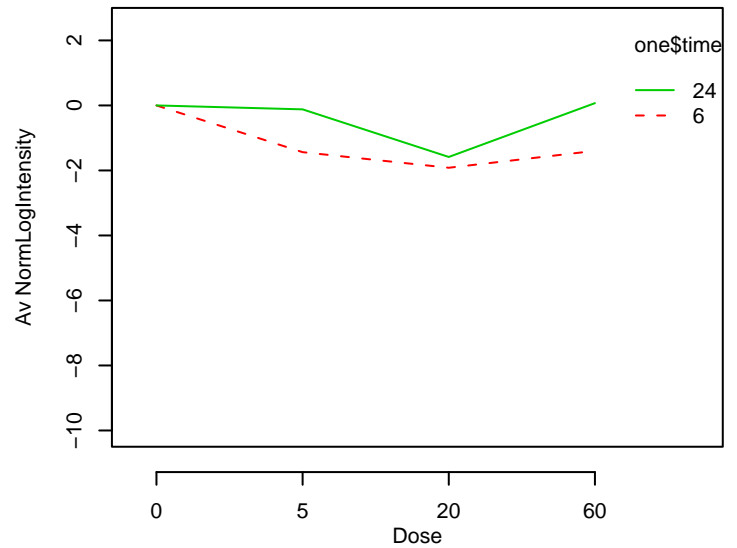

**GO\_0000187 : activation of MAPK activity**

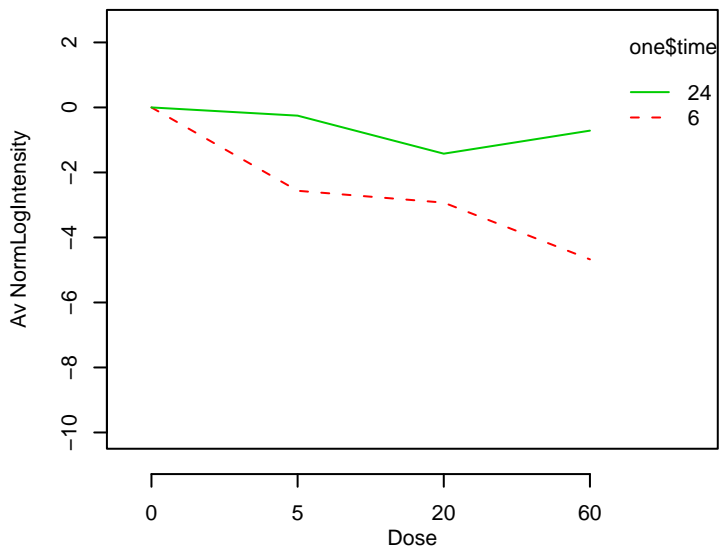

**GO\_0000188 : inactivation of MAPK activity**

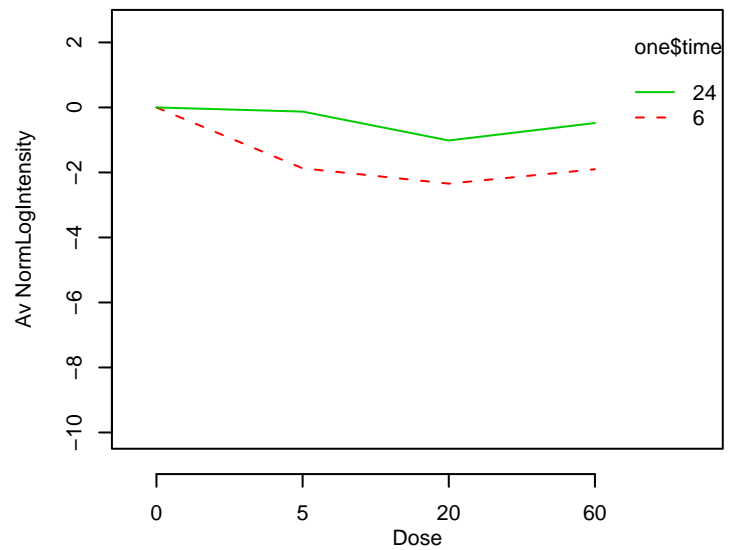

**GO\_0000209 : protein polyubiquitination**

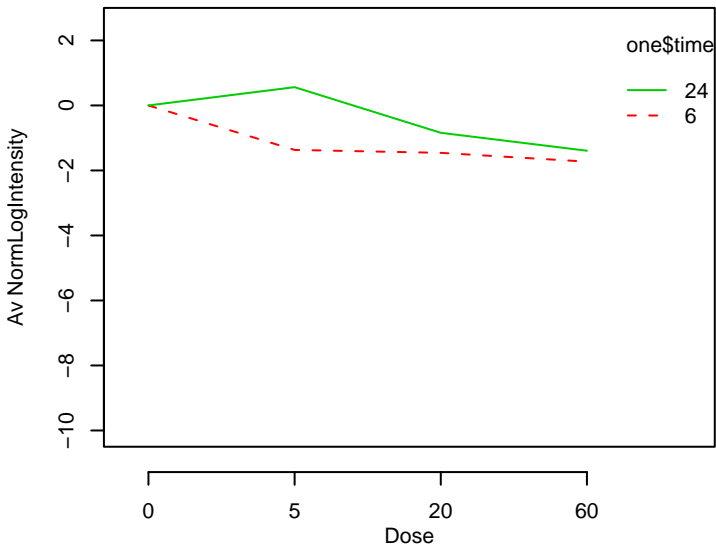

**GO\_0000226 : microtubule cytoskeleton organization and bio**

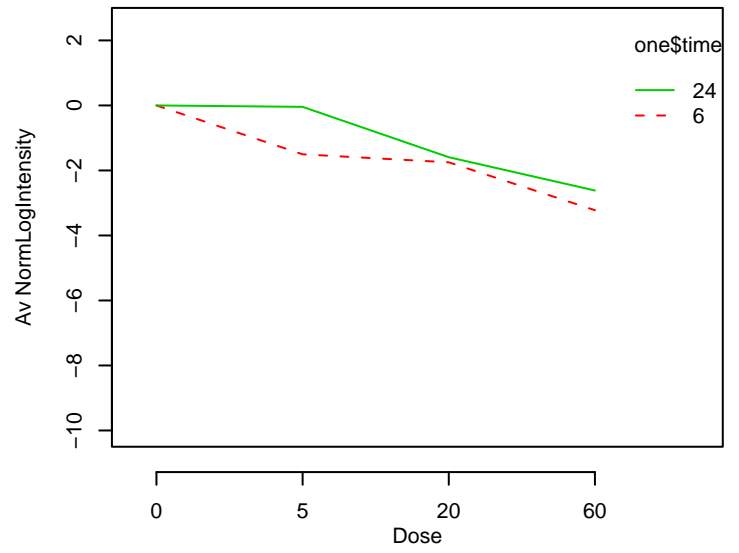

**GO\_0000244 : assembly of spliceosomal tri-snRNP**

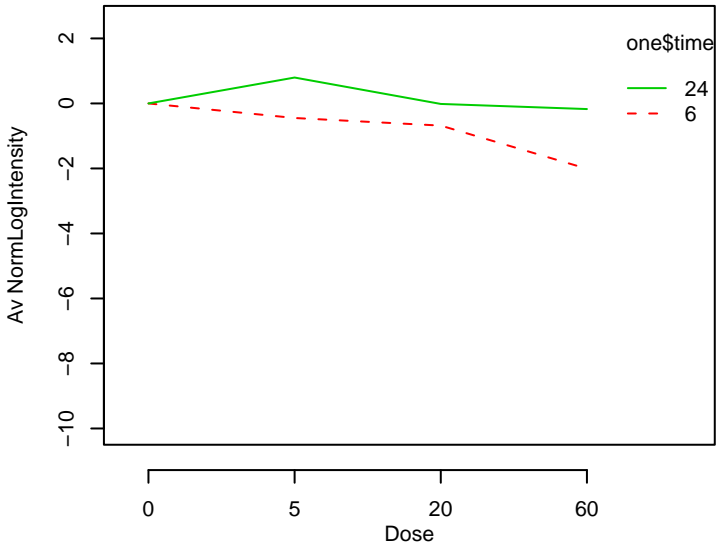

**GO\_0000245 : spliceosome assembly**

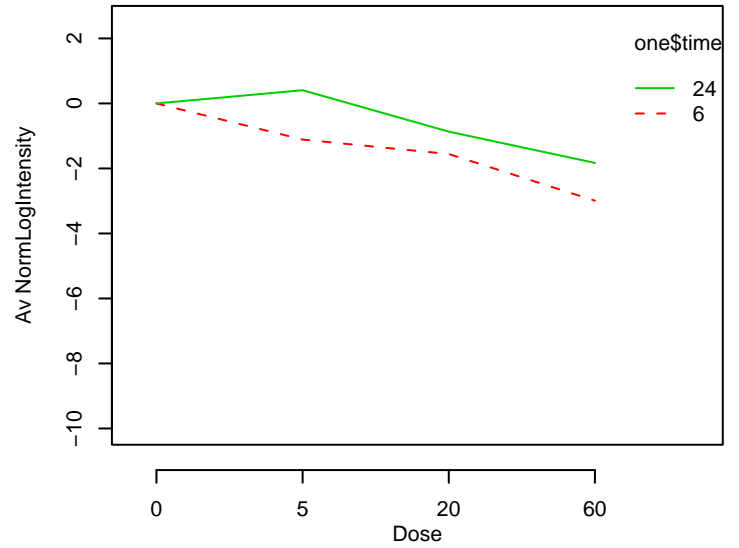

**GO\_0000270 : peptidoglycan metabolism**

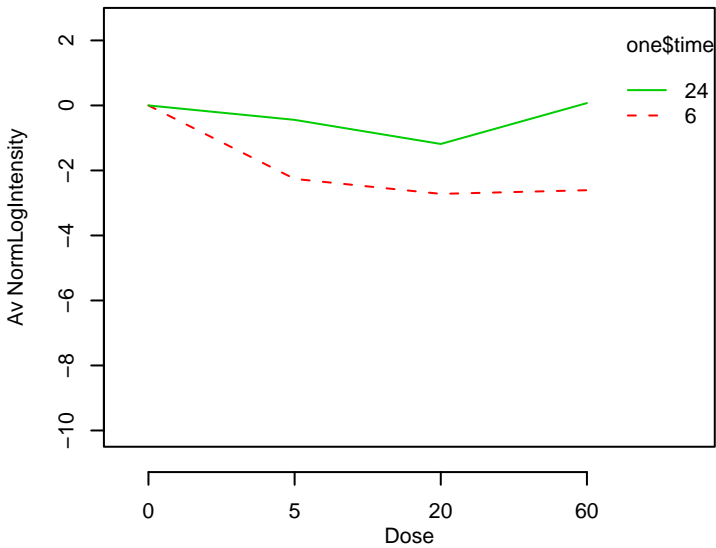

**GO\_0000271 : polysaccharide biosynthesis**

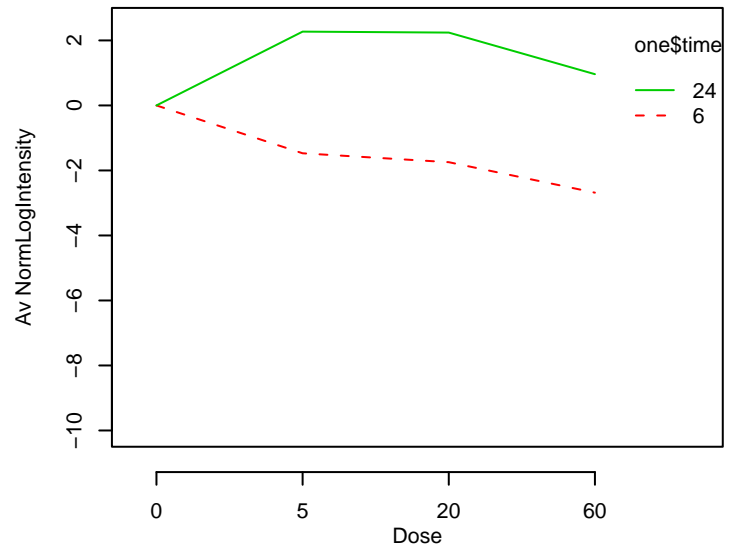

**GO\_000272 : polysaccharide catabolism**

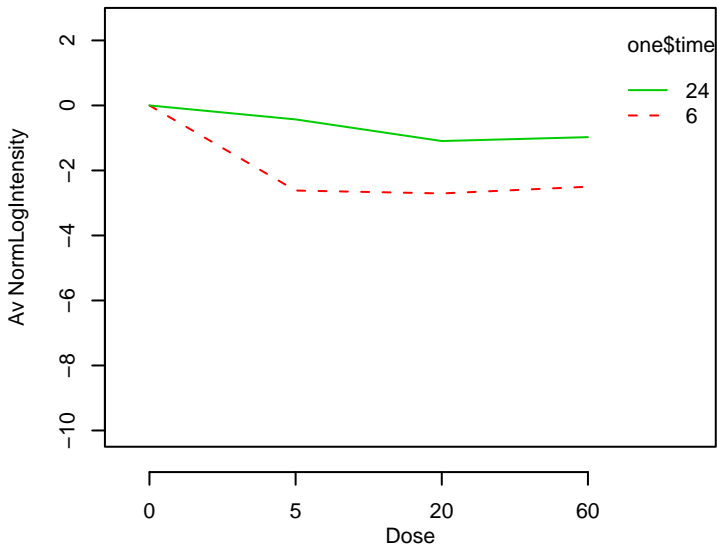

**GO\_000278 : mitotic cell cycle**

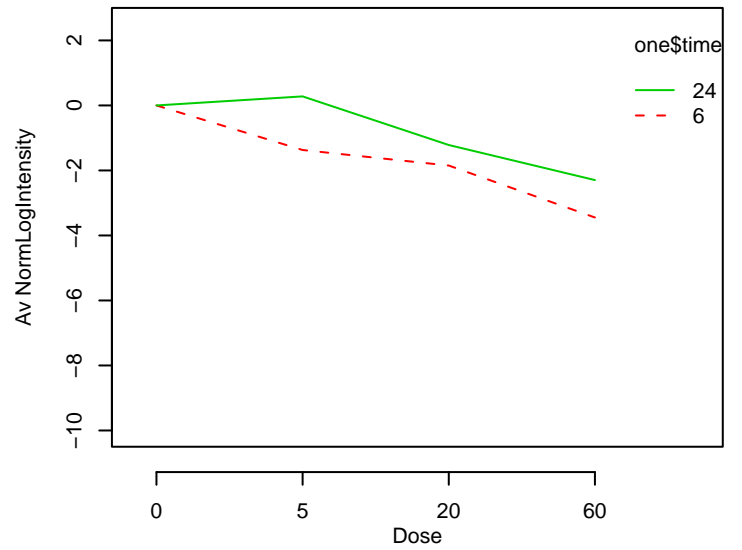

**GO\_000279 : M phase**

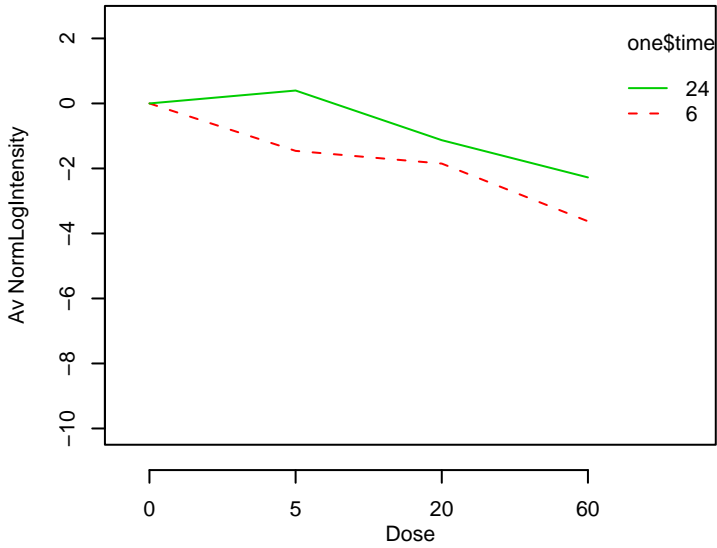

**GO\_000302 : response to reactive oxygen species**

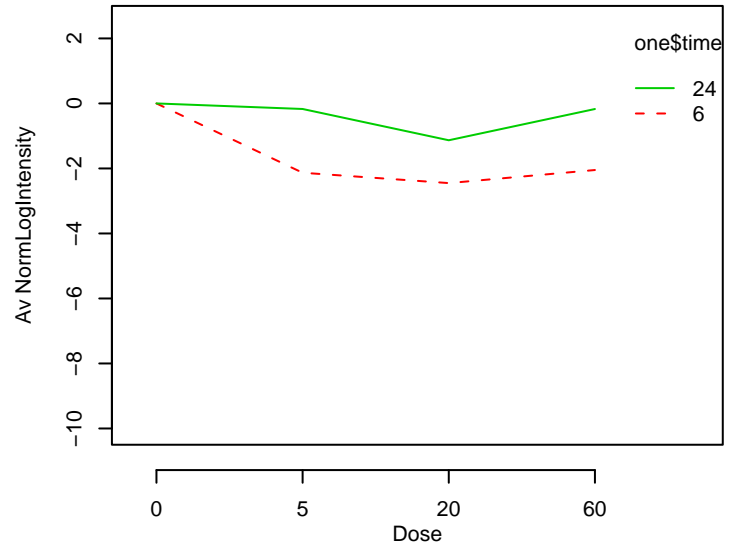

**GO\_000375 : RNA splicing, via transesterification reaction** **GO\_000377 : RNA splicing, via transesterification reaction**

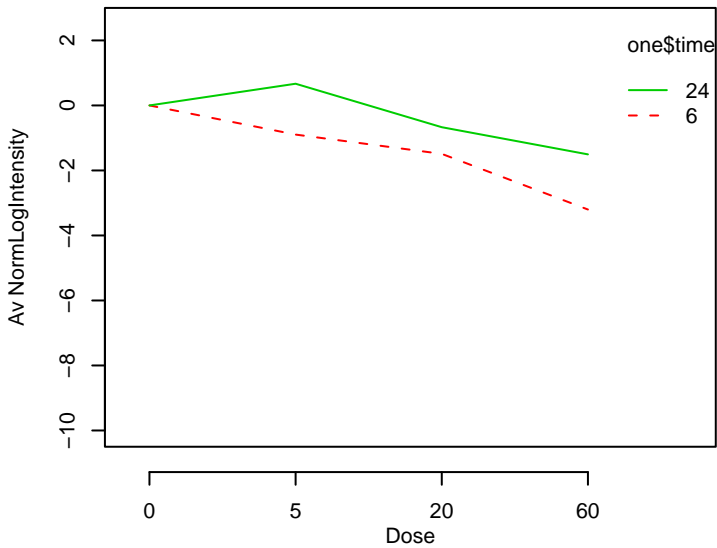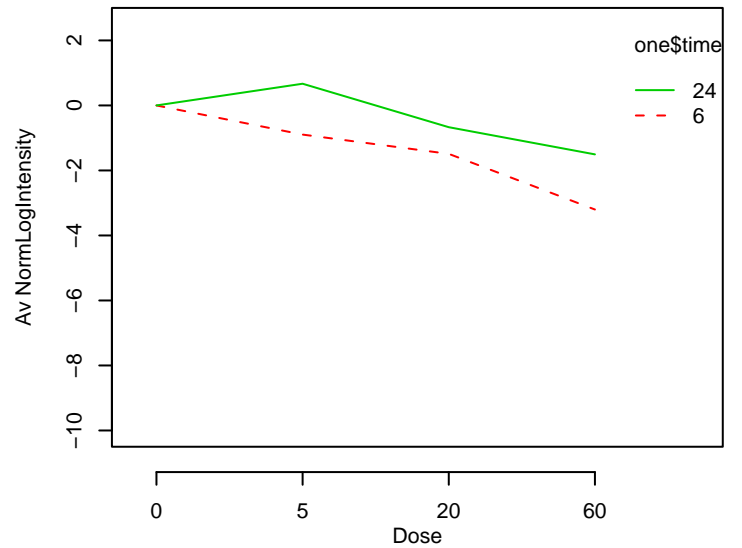

**GO\_000387 : spliceosomal snRNP biogenesis**

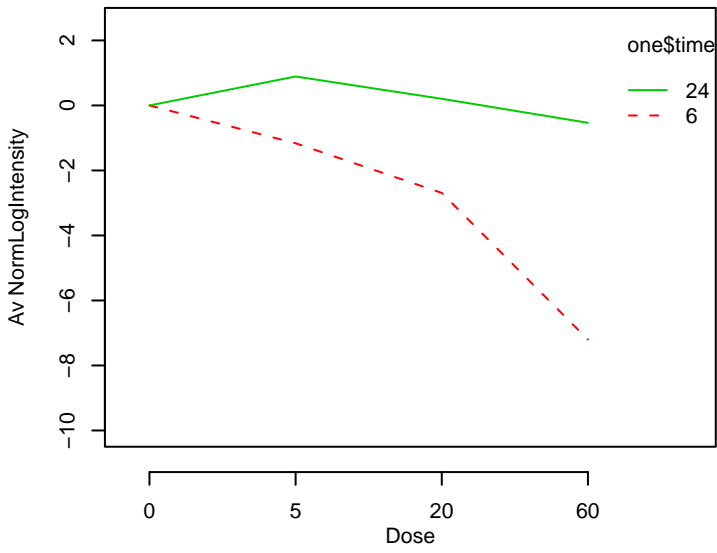

**GO\_000398 : nuclear mRNA splicing, via spliceosome**

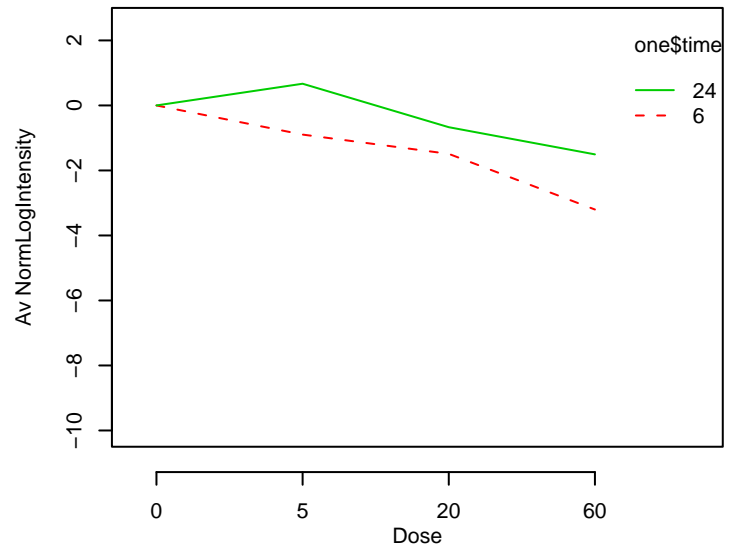

**GO\_000578 : embryonic axis specification**

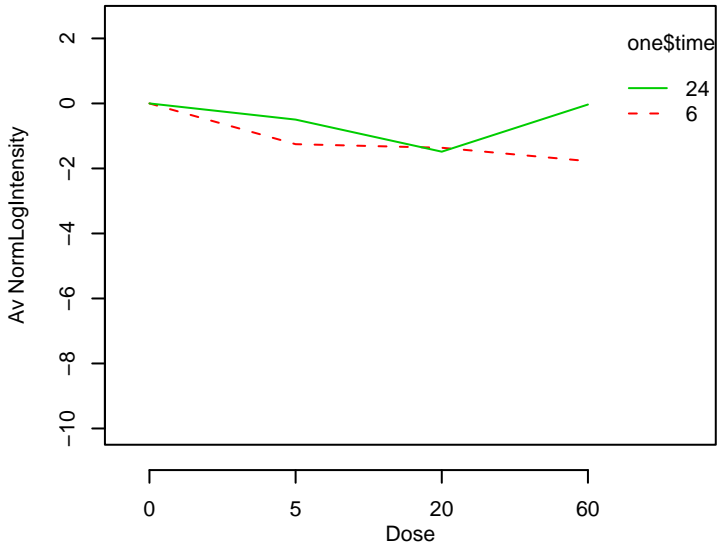

**GO\_000723 : telomere maintenance**

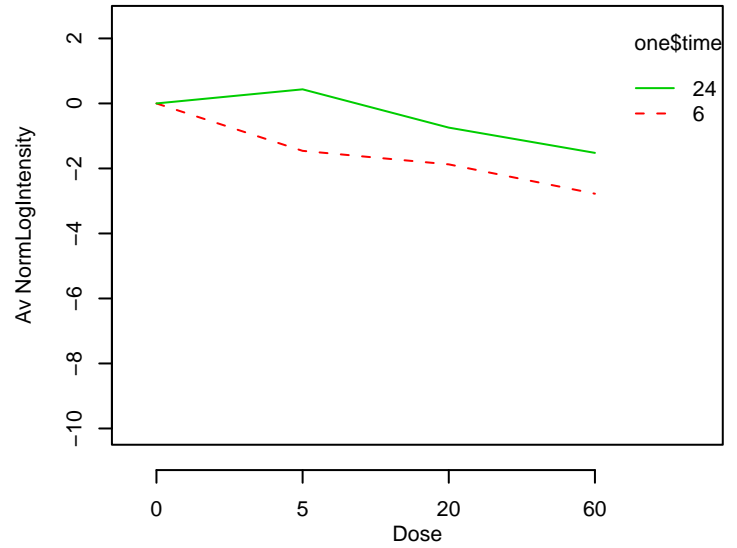

**O\_000724 : double-strand break repair via homologous recombination**

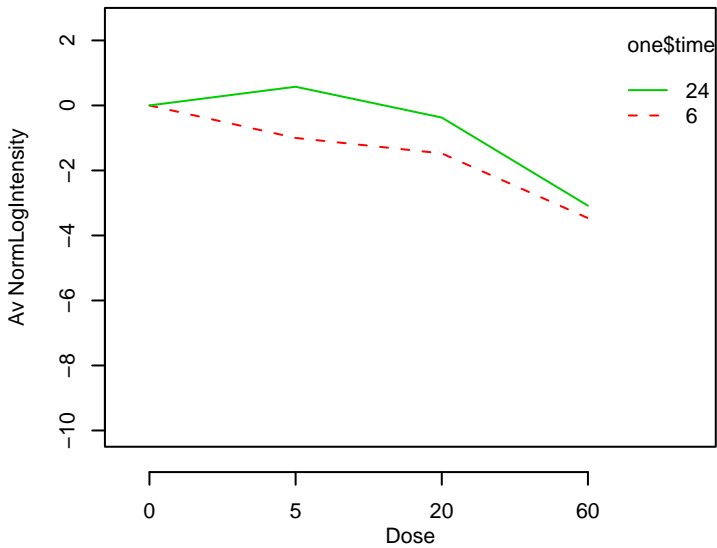

**GO\_000725 : recombinational repair**

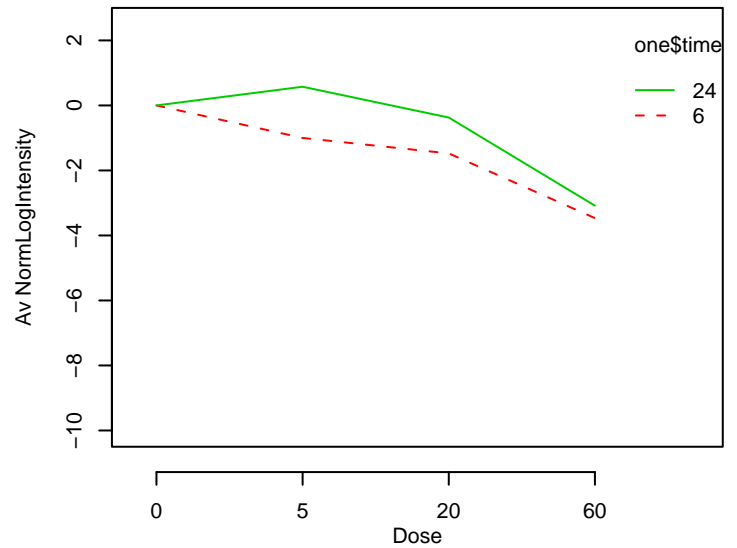



**GO\_0000726 : non-recombinational repair**

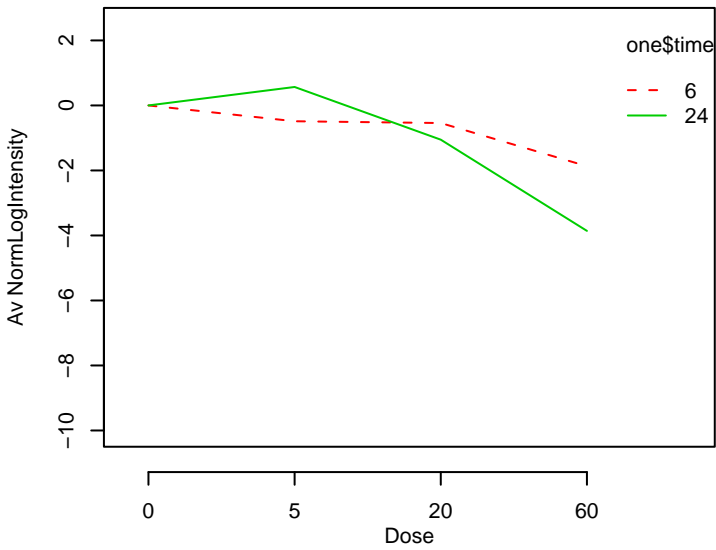

**GO\_0000731 : DNA synthesis during DNA repair**

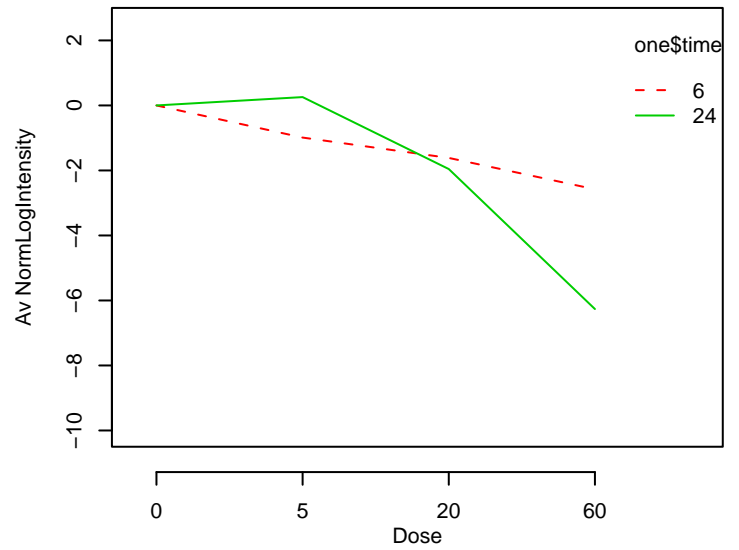

**GO\_0000819 : sister chromatid segregation**

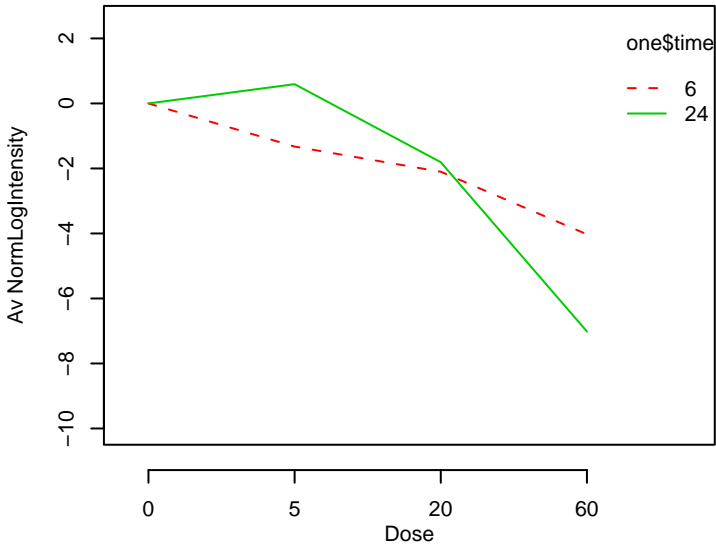

**GO\_0000904 : cellular morphogenesis during differentiatio**

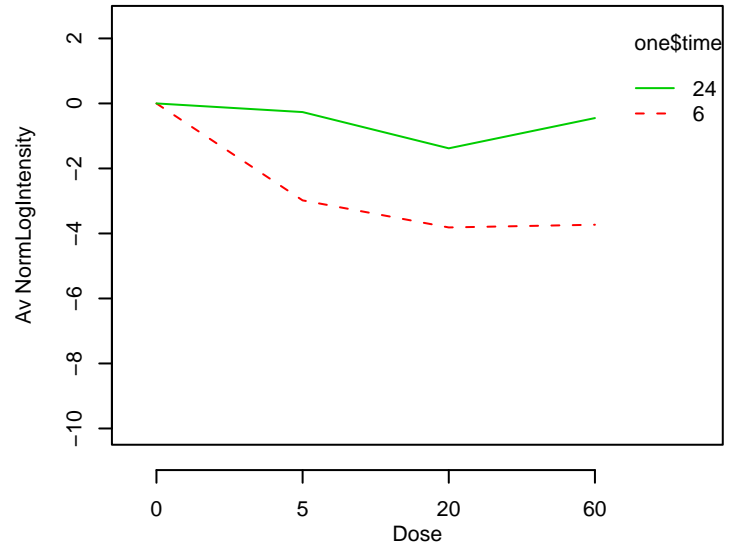

**GO\_0000910 : cytokinesis**

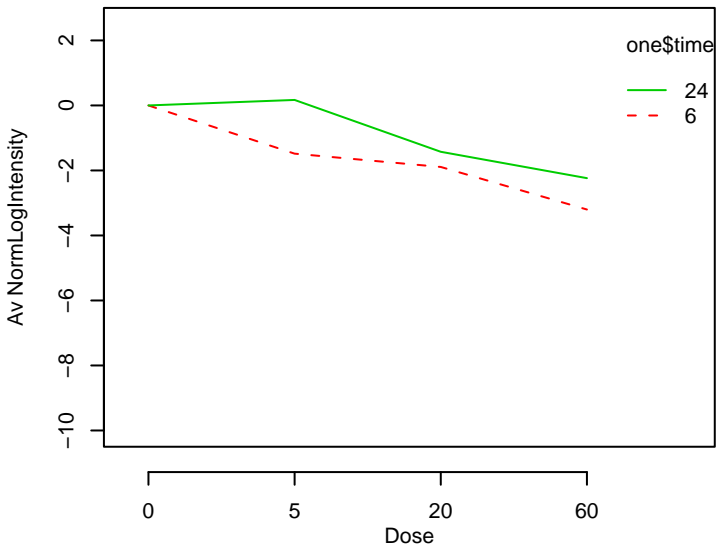

**GO\_0001501 : skeletal development**

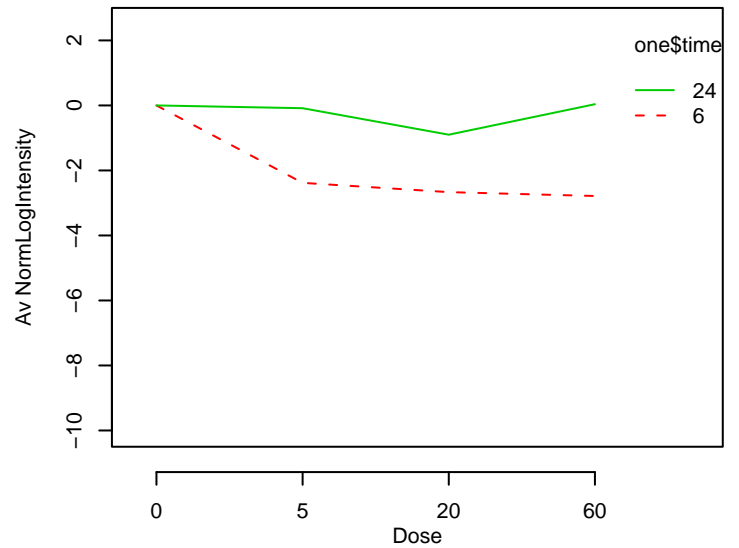

**GO\_0001502 : cartilage condensation**

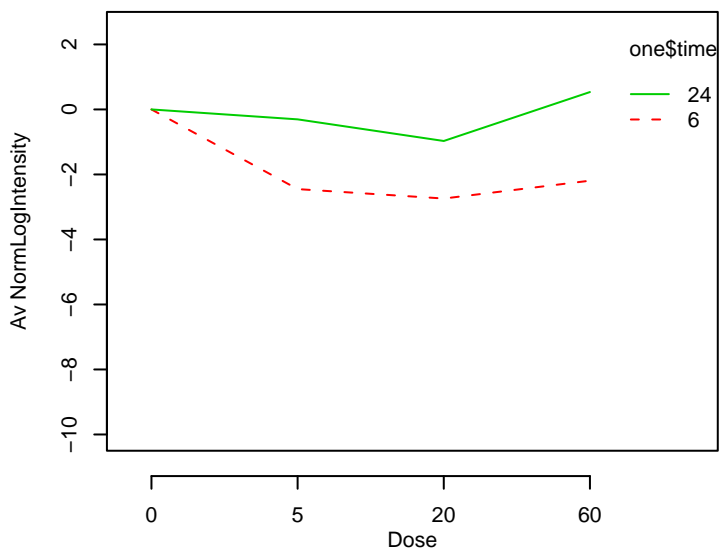

**GO\_0001503 : ossification**

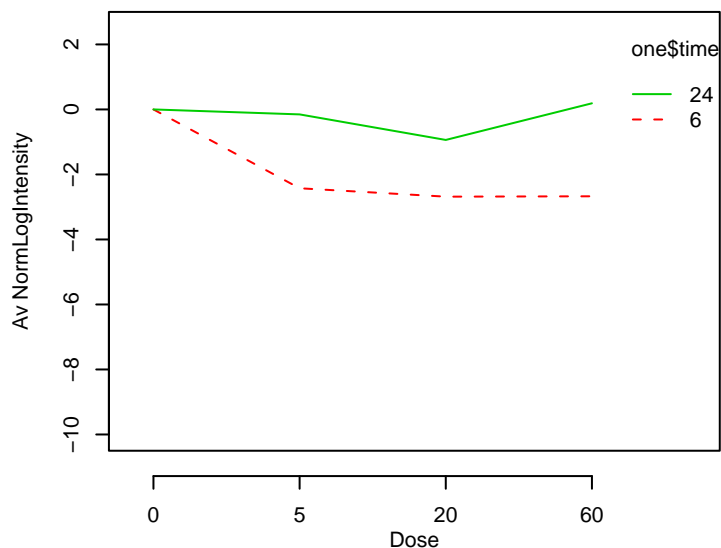

**GO\_0001504 : neurotransmitter uptake**

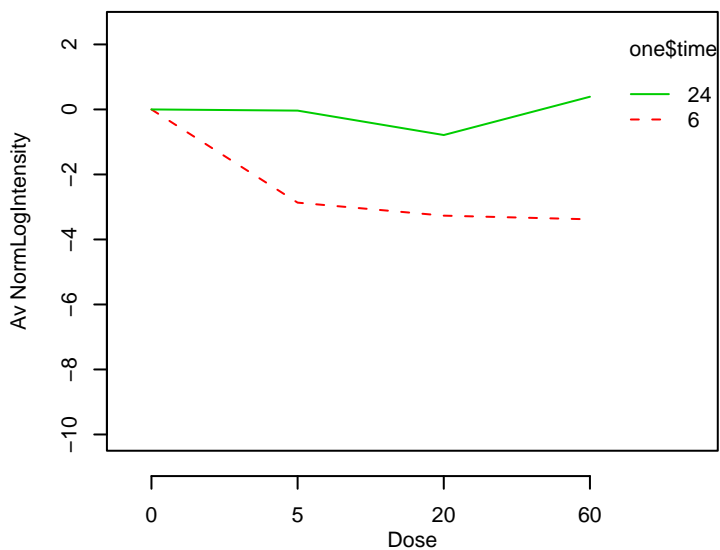

**GO\_0001505 : regulation of neurotransmitter levels**

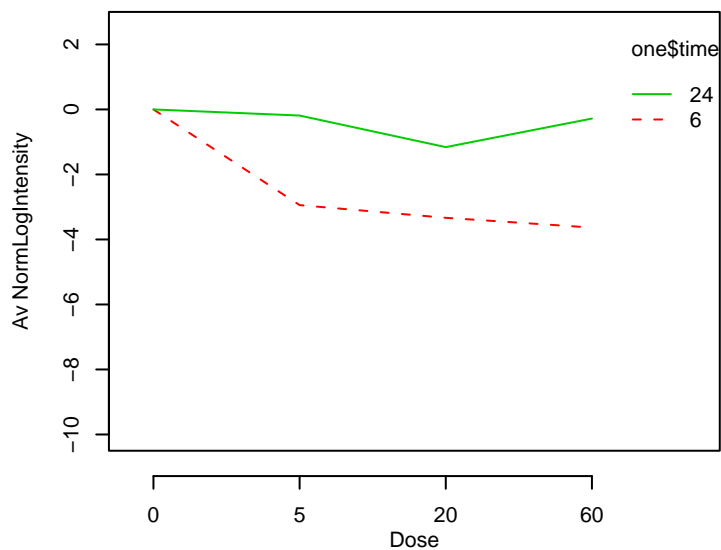

**GO\_0001508 : regulation of action potential**

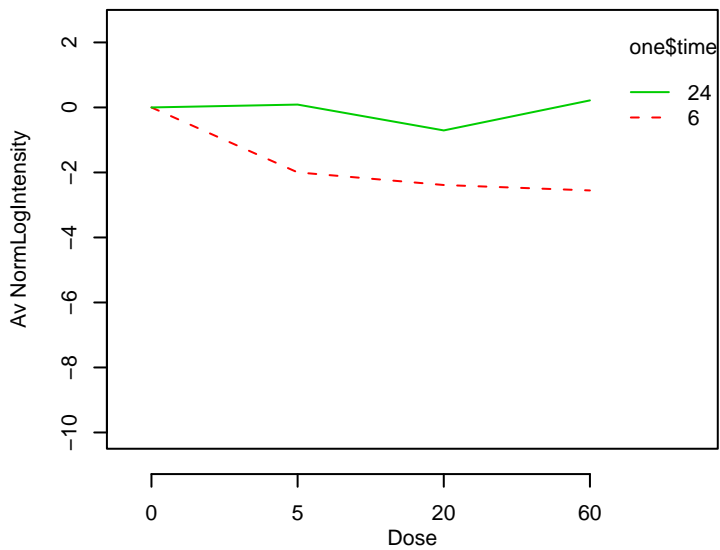

**GO\_0001514 : selenocysteine incorporation**

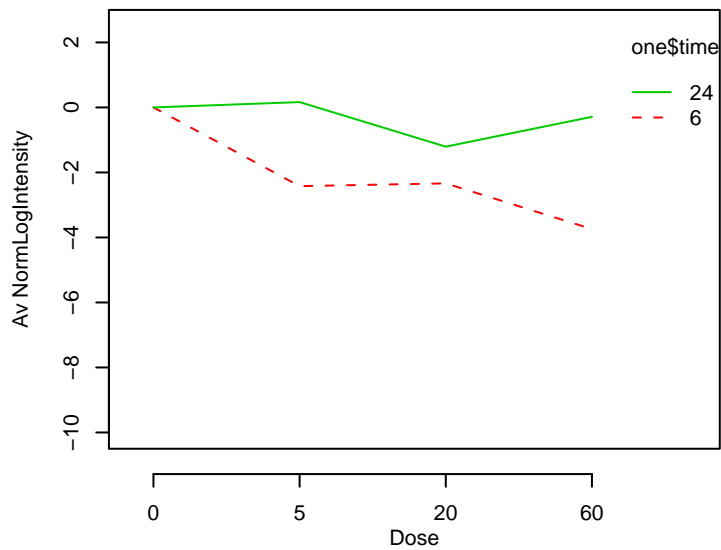

**GO\_0001516 : prostaglandin biosynthesis**

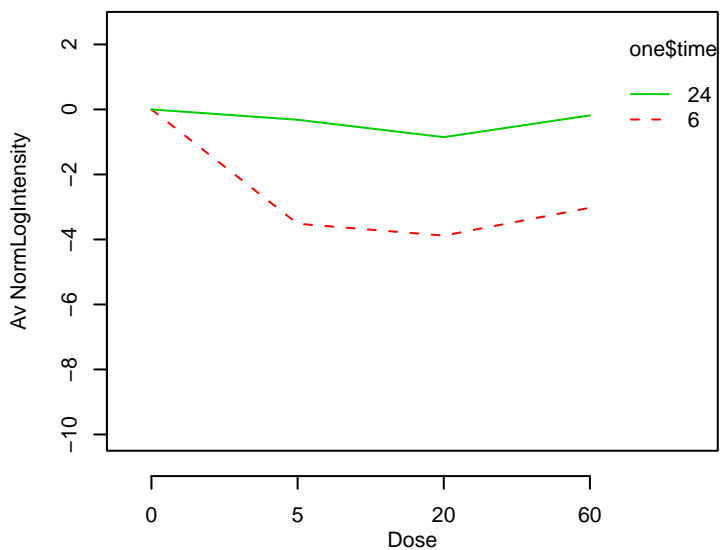

**GO\_0001523 : retinoid metabolism**

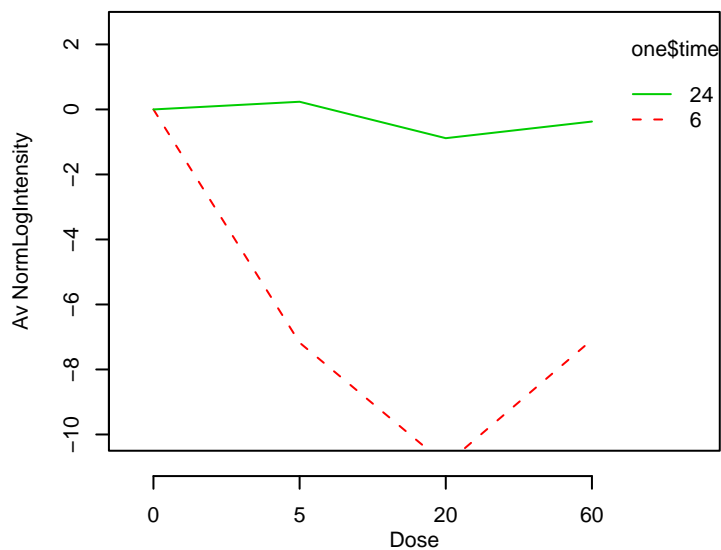

**GO\_0001525 : angiogenesis**

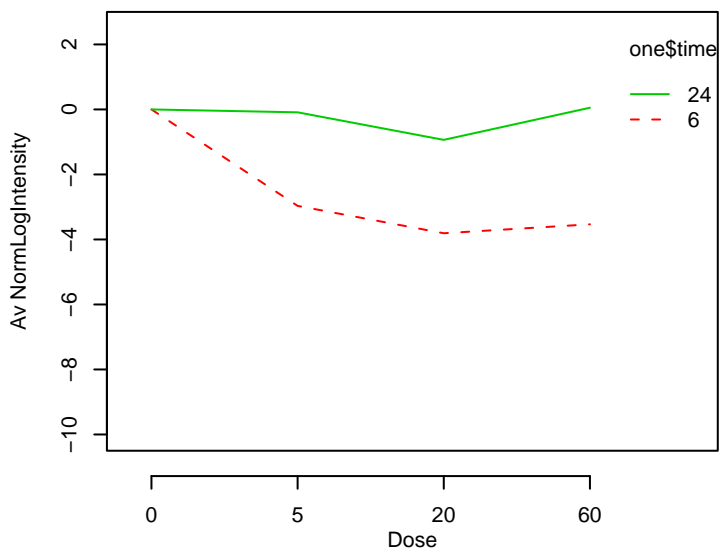

**GO\_0001539 : ciliary or flagellar motility**

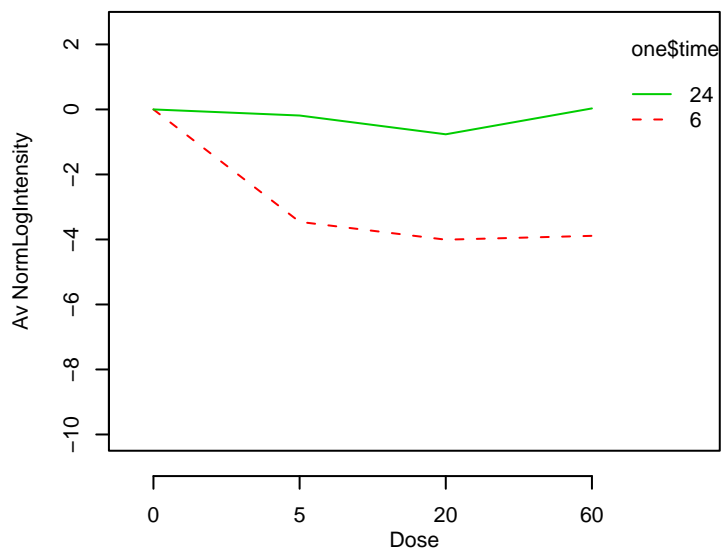

**GO\_0001541 : ovarian follicle development**

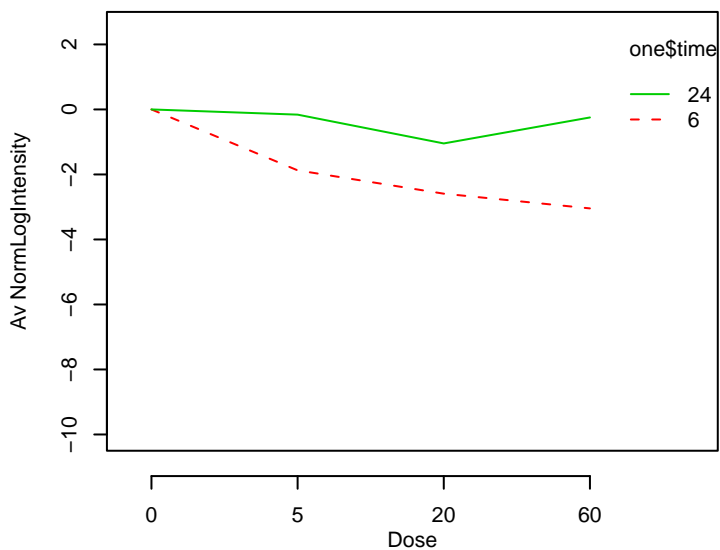

**GO\_0001542 : ovulation (sensu Mammalia)**

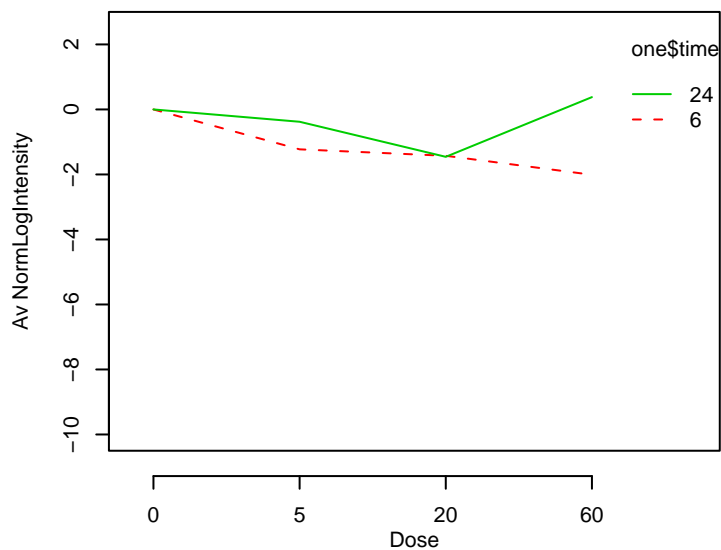

**GO\_0001556 : oocyte maturation**

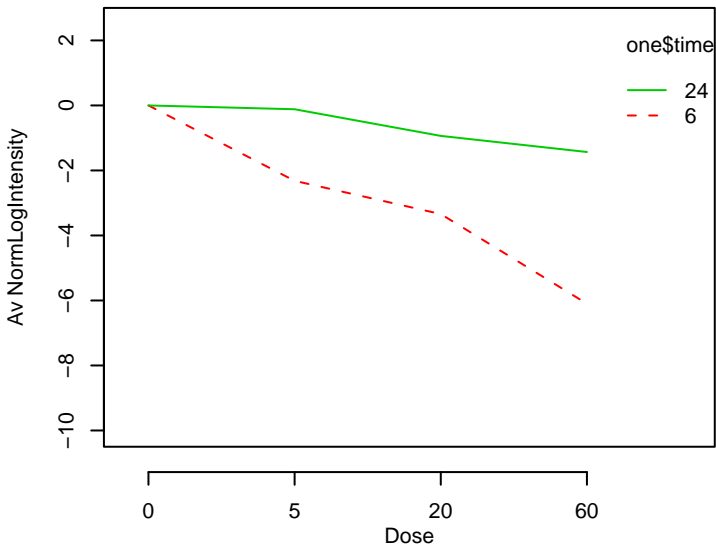

**GO\_0001558 : regulation of cell growth**

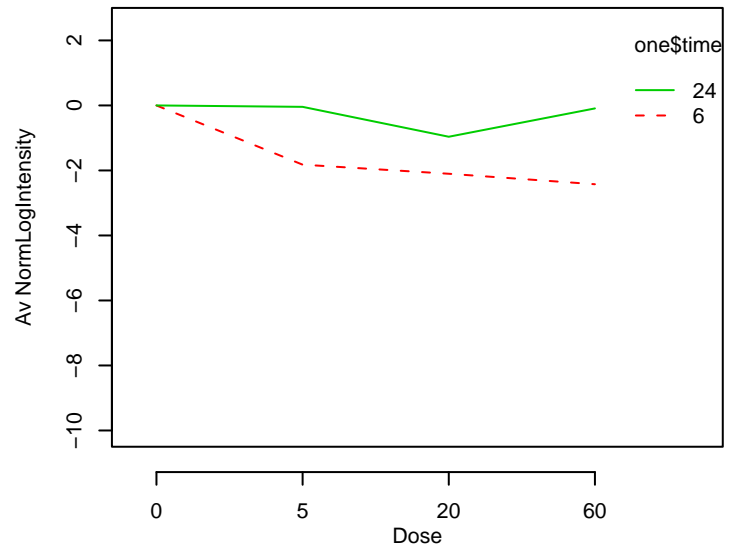

**GO\_0001568 : blood vessel development**

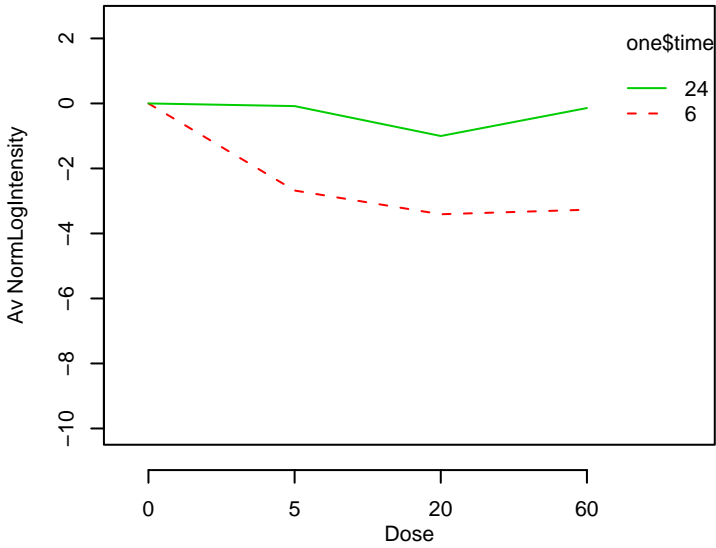

**GO\_0001569 : patterning of blood vessels**

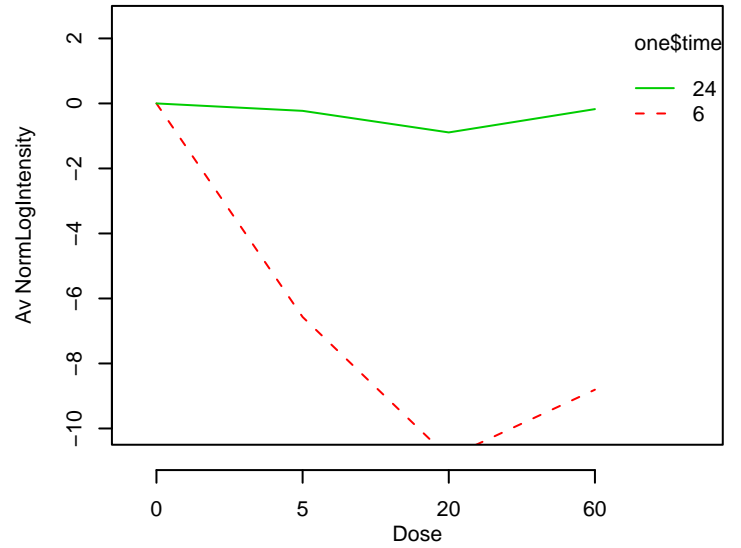

**GO\_0001570 : vasculogenesis**

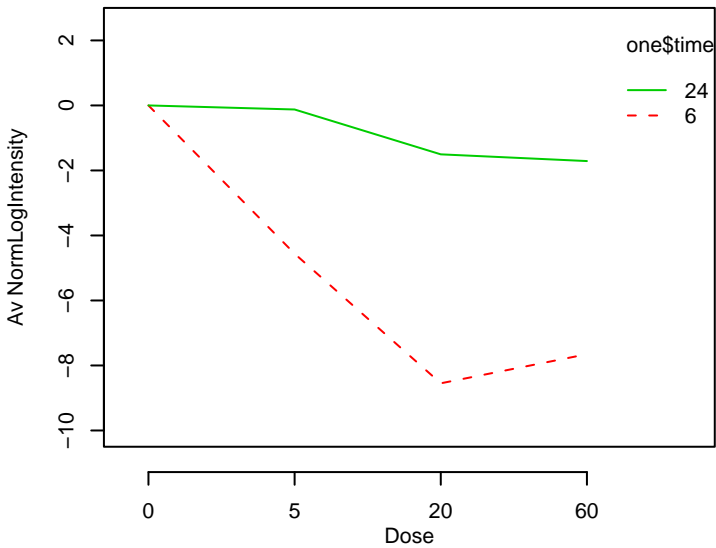

**GO\_0001573 : ganglioside metabolism**

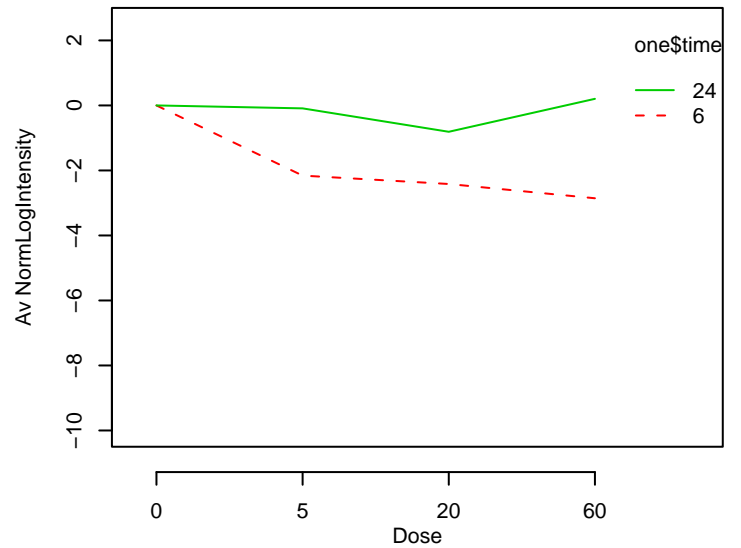

**GO\_0001578 : microtubule bundle formation**

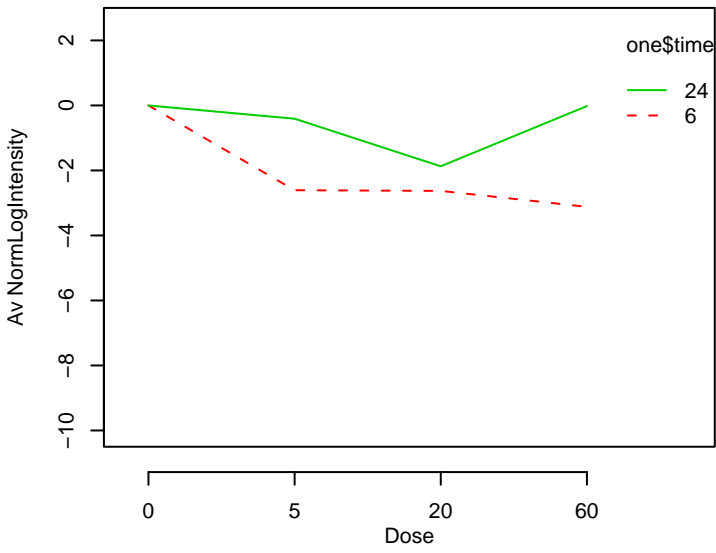

**GO\_0001649 : osteoblast differentiation**

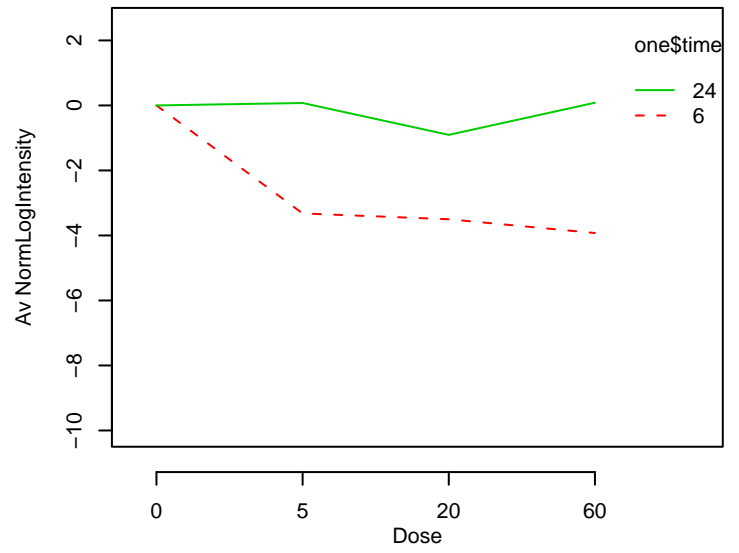

**GO\_0001654 : eye development**

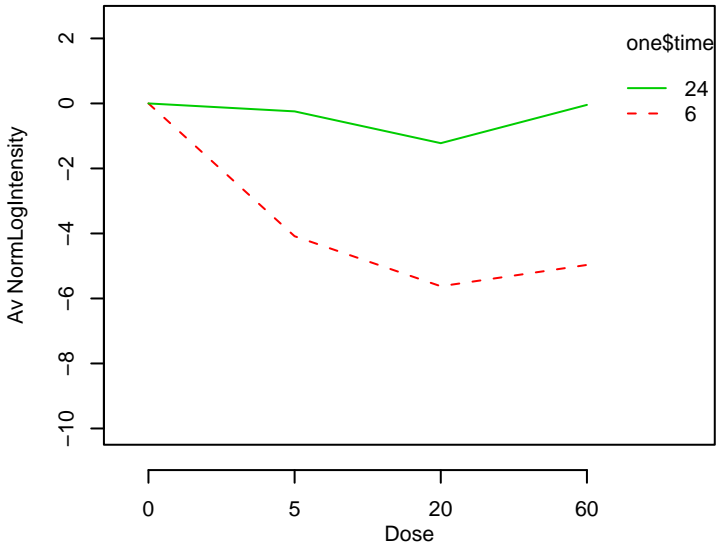

**GO\_0001655 : urogenital system development**

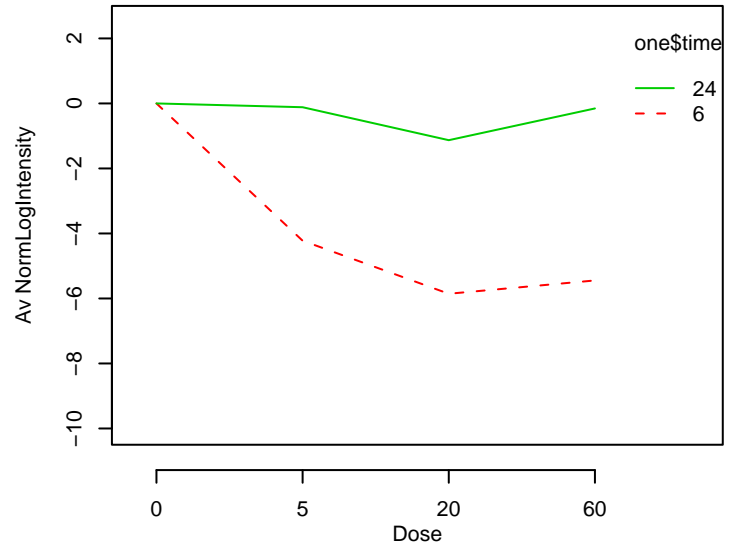

**GO\_0001656 : metanephros development**

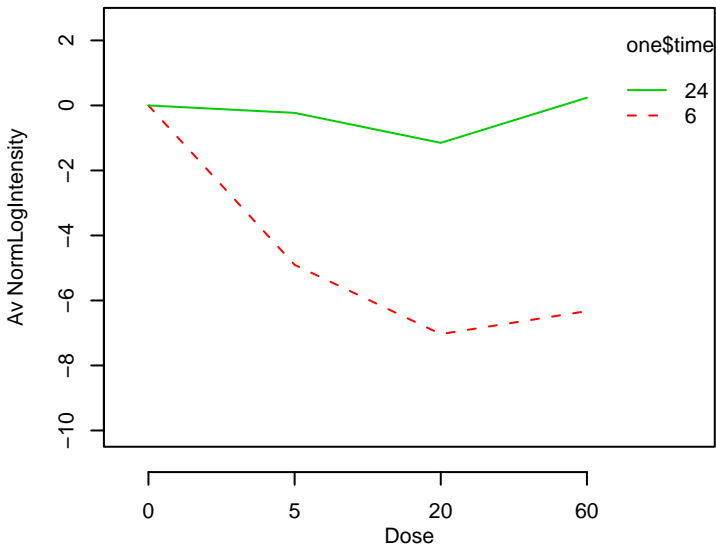

**GO\_0001657 : ureteric bud development**

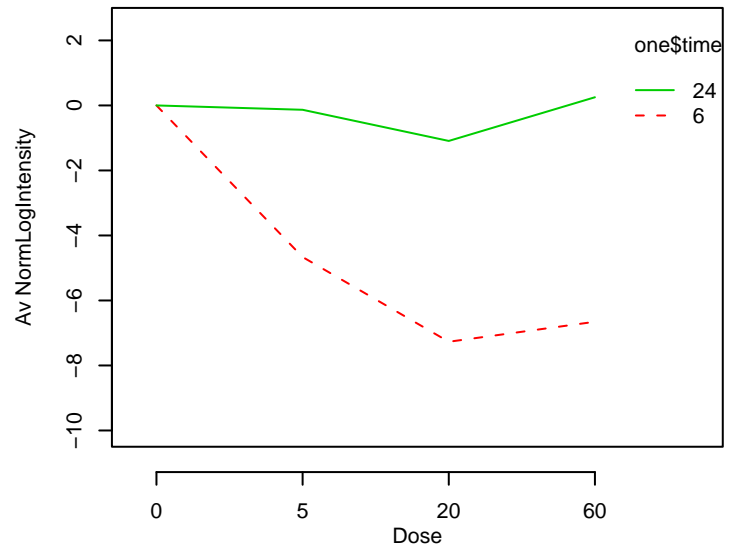

**GO\_0001658 : ureteric bud branching**

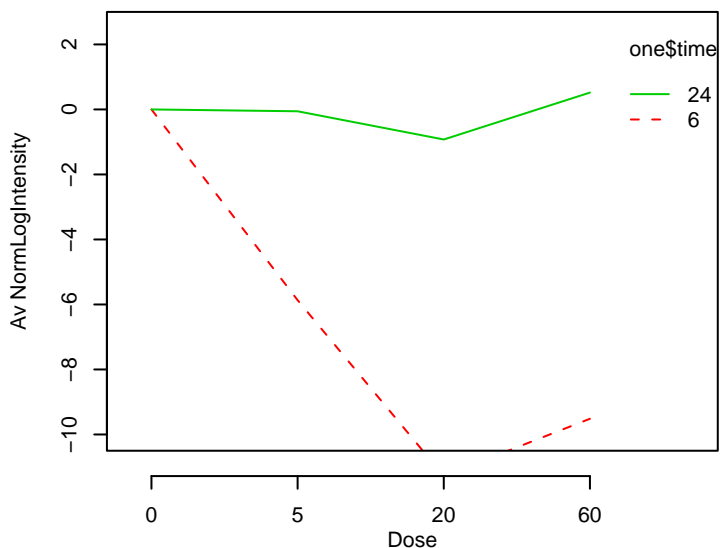

**GO\_0001659 : thermoregulation**

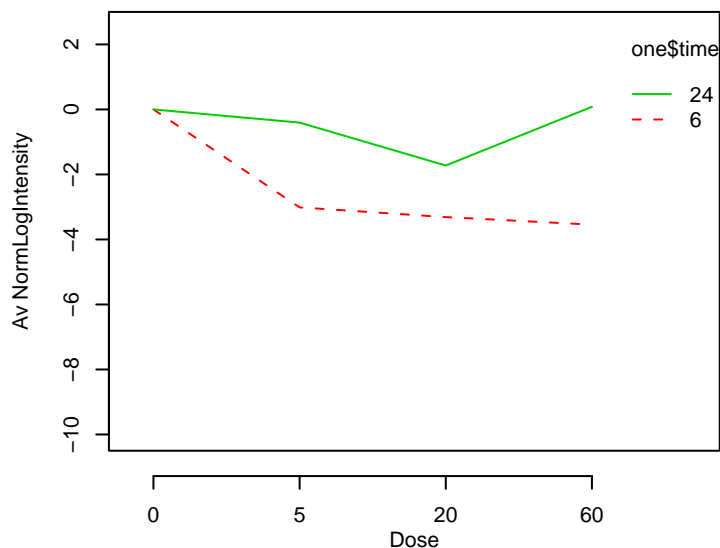

**GO\_0001662 : behavioral fear response**

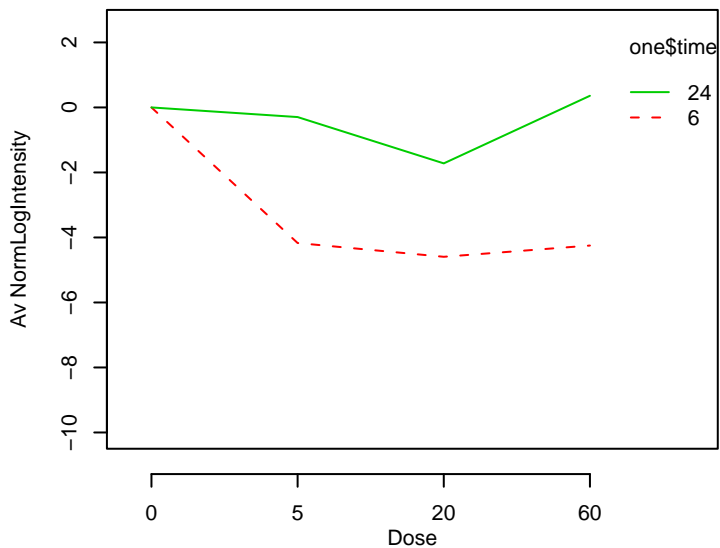

**GO\_0001666 : response to hypoxia**

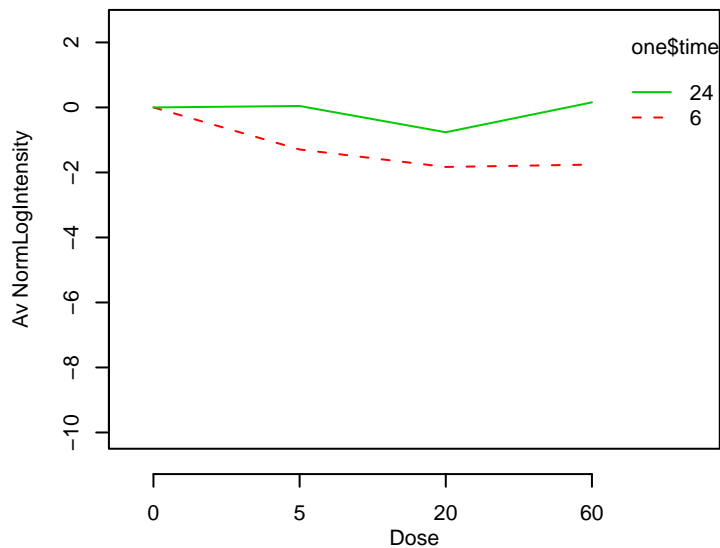

**GO\_0001675 : acrosome formation**

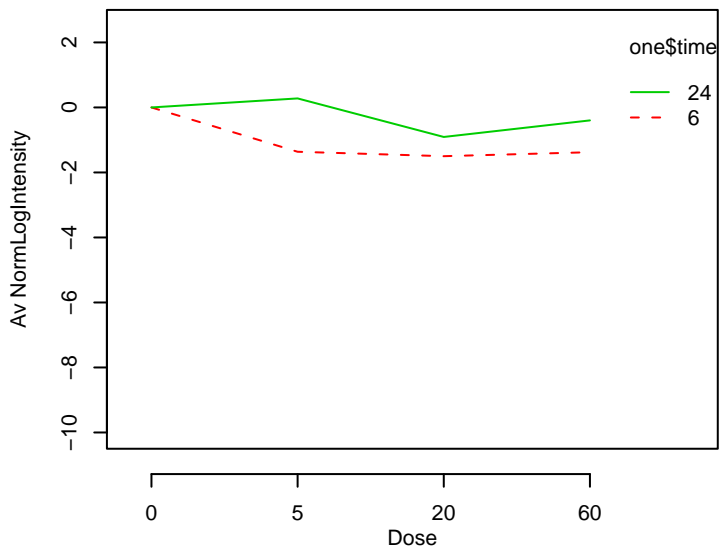

**GO\_0001676 : long-chain fatty acid metabolism**

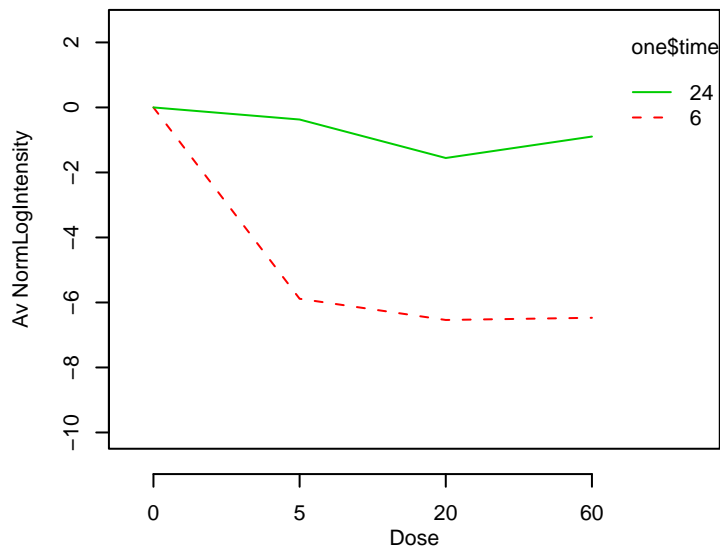

**GO\_0001701 : embryonic development (sensu Mammalia)**

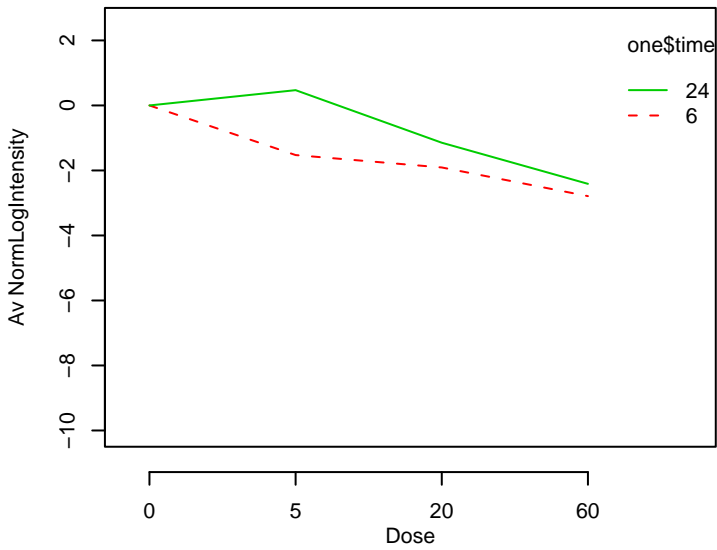

**GO\_0001702 : gastrulation (sensu Deuterostomia)**

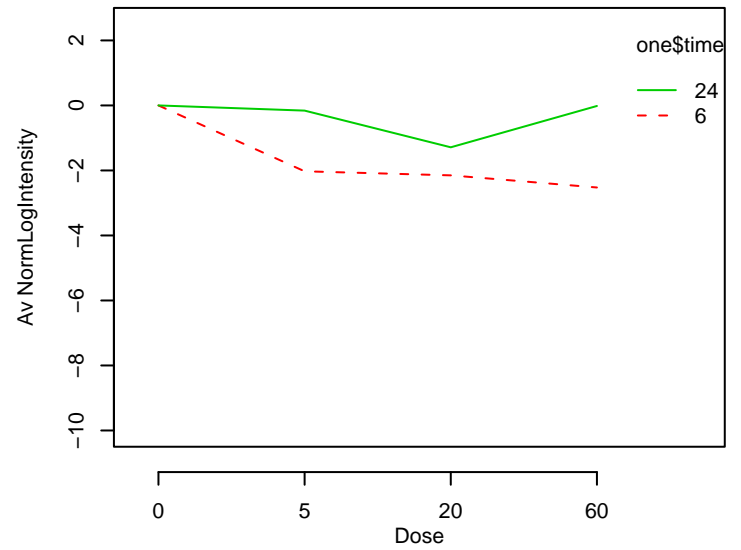

**GO\_0001704 : formation of primary germ layer**

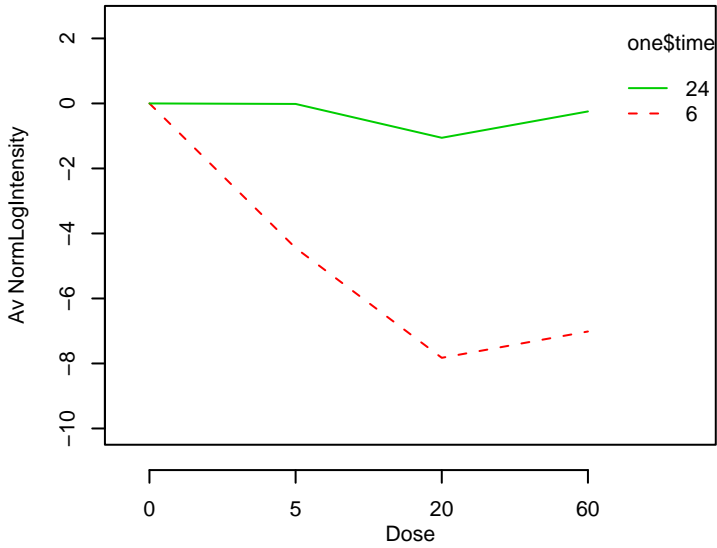

**GO\_0001707 : mesoderm formation**

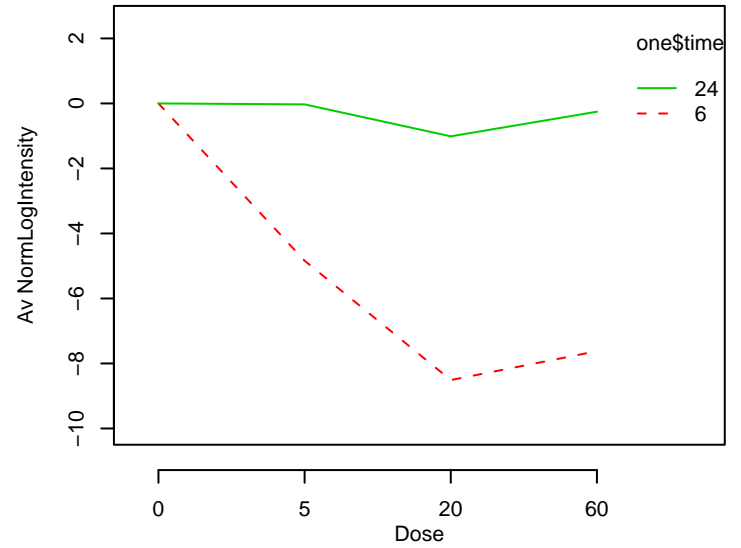

**GO\_0001708 : cell fate specification**

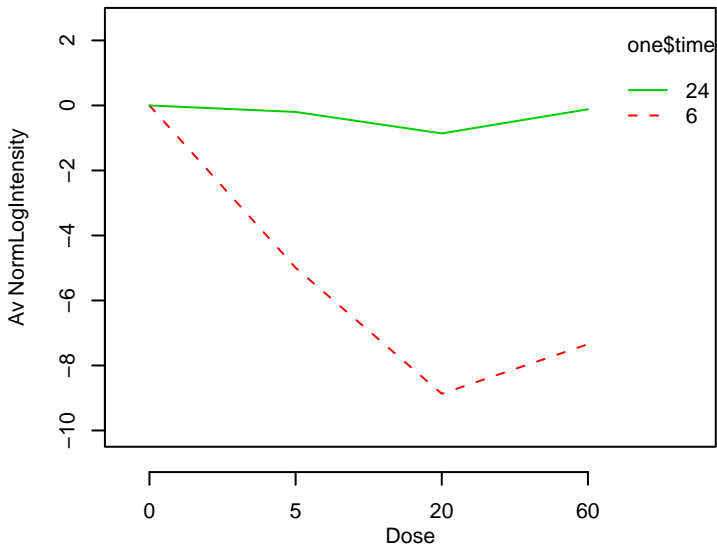

**GO\_0001709 : cell fate determination**

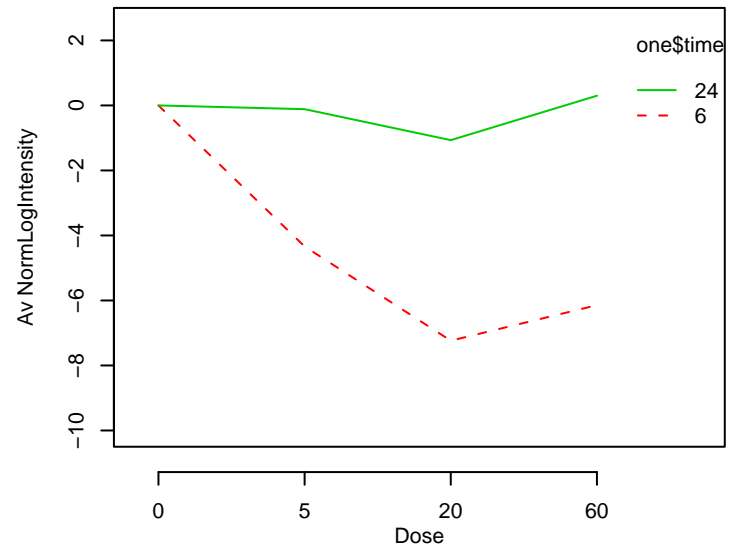

**GO\_0001736 : establishment of planar polarity**

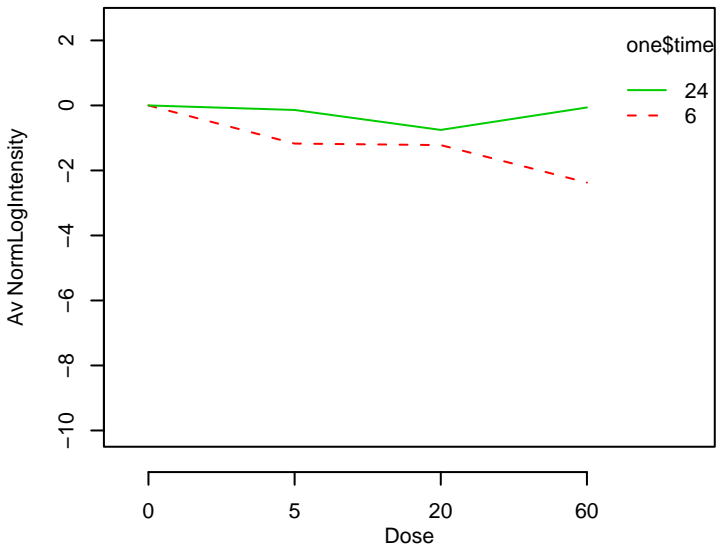

**GO\_0001738 : morphogenesis of a polarized epithelium**

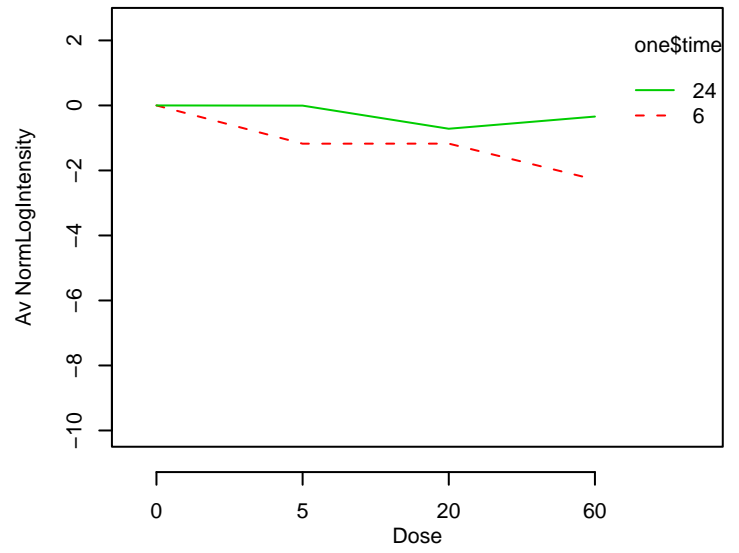

**GO\_0001747 : eye development (sensu Mammalia)**

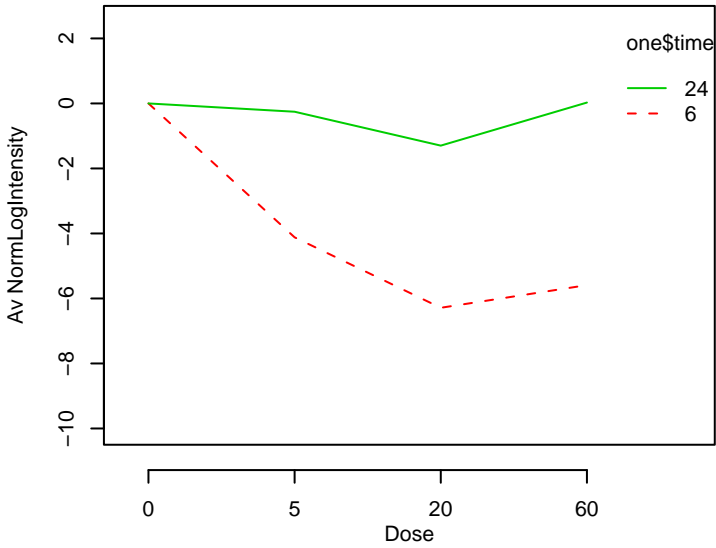

**GO\_0001754 : eye photoreceptor cell differentiation**

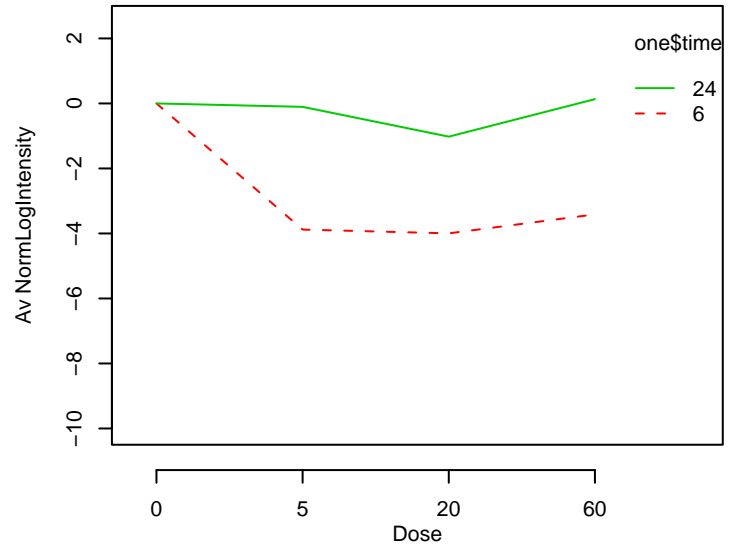

**GO\_0001755 : neural crest cell migration**

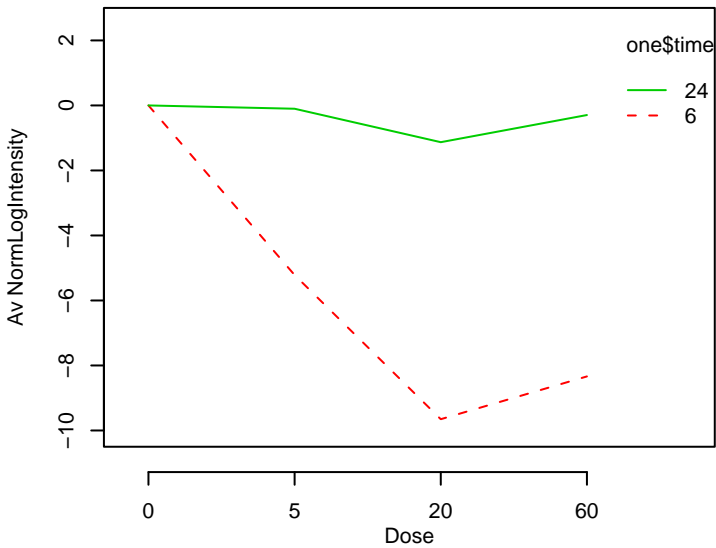

**GO\_0001756 : somitogenesis**

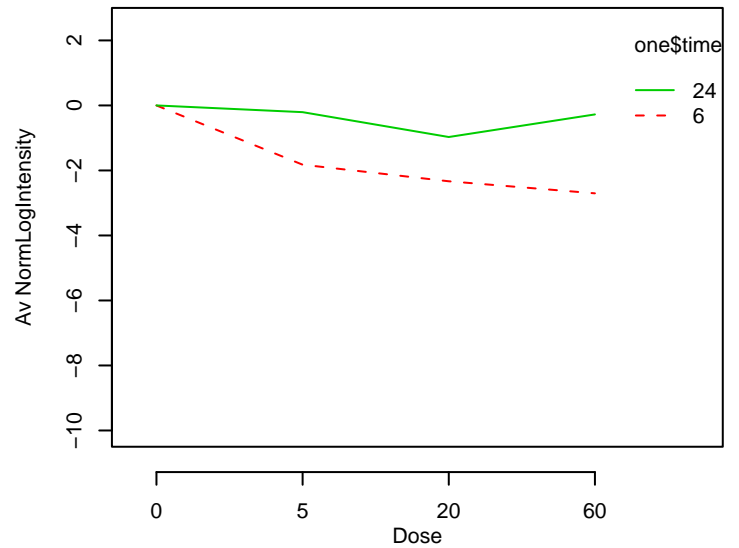



**GO\_0001759 : induction of an organ**

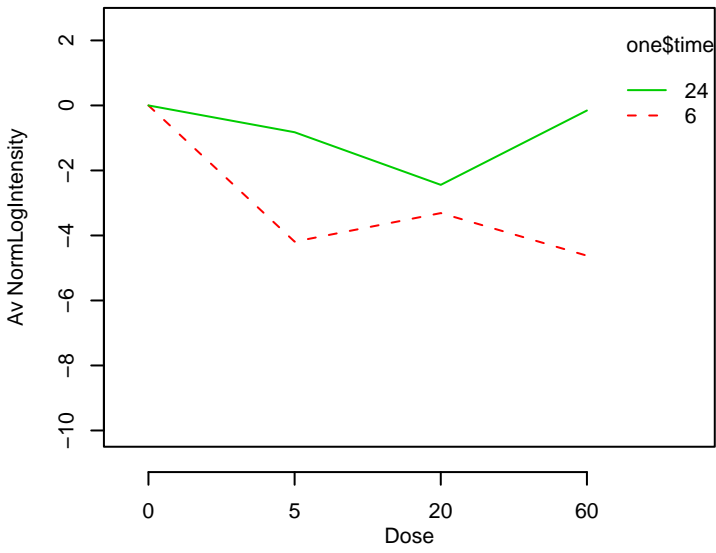

**GO\_0001763 : morphogenesis of a branching structure**

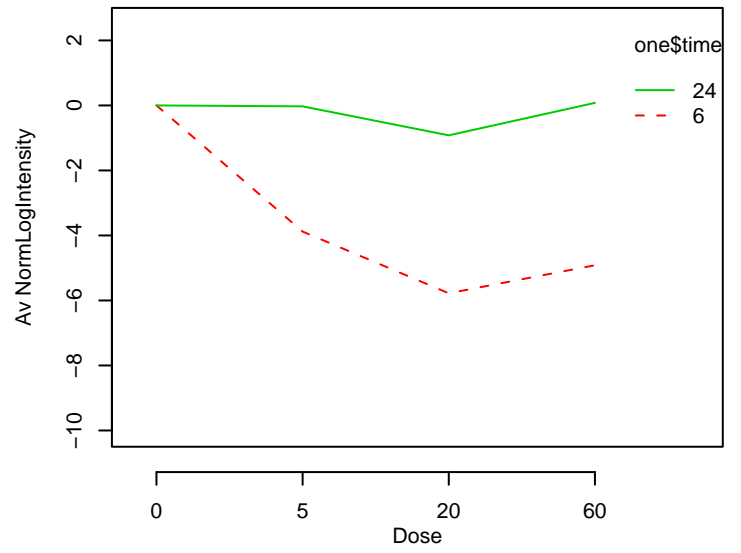

**GO\_0001764 : neuron migration**

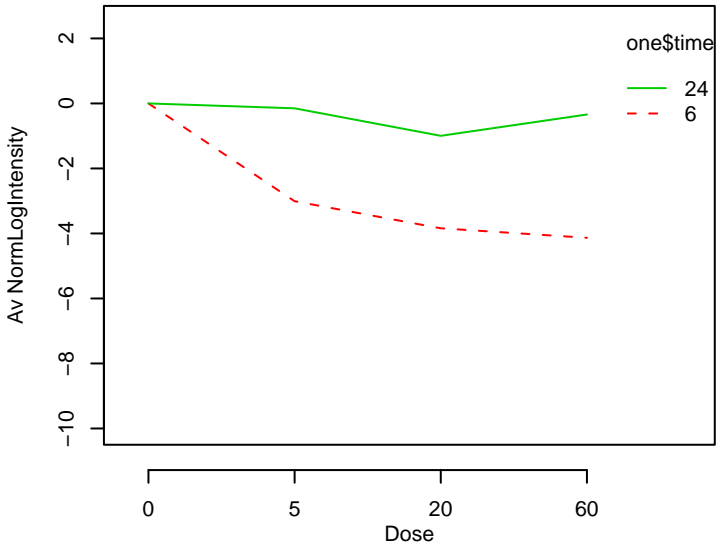

**GO\_0001773 : myeloid dendritic cell activation**

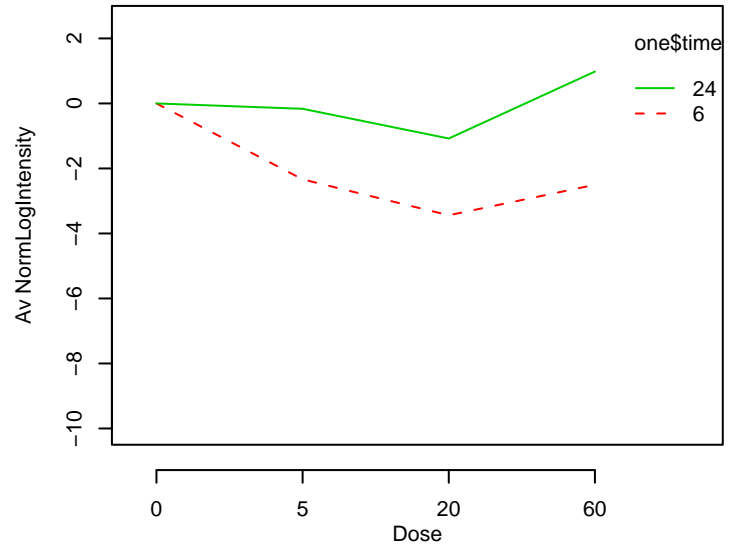

**GO\_0001775 : cell activation**

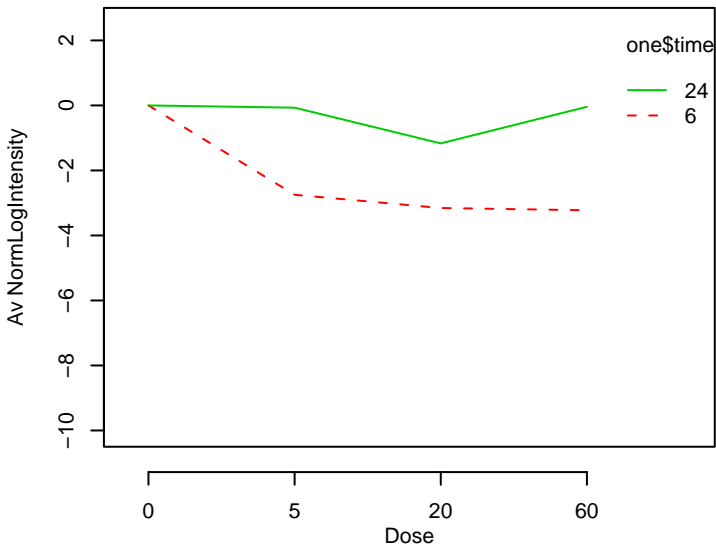

**GO\_0001776 : leukocyte homeostasis**

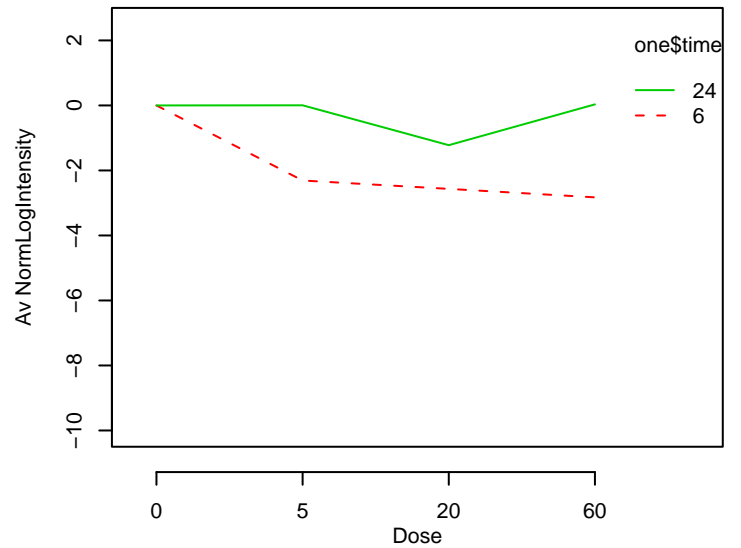

**GO\_0001782 : B cell homeostasis**

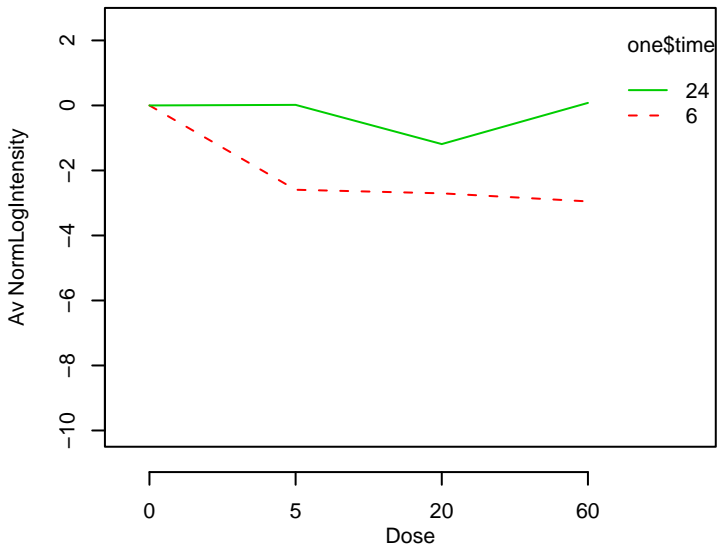

**GO\_0001816 : cytokine production**

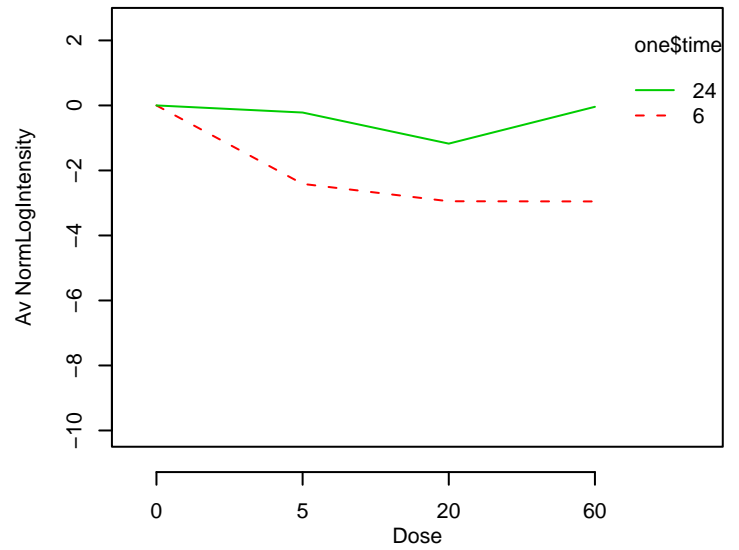

**GO\_0001817 : regulation of cytokine production**

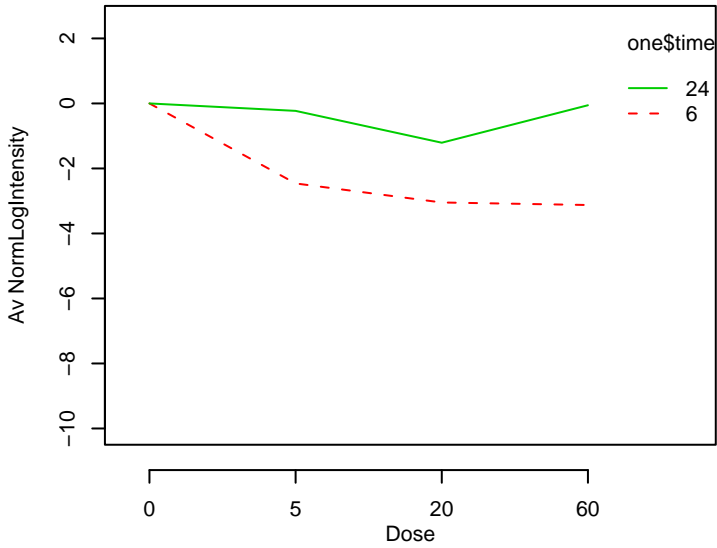

**GO\_0001818 : negative regulation of cytokine production**

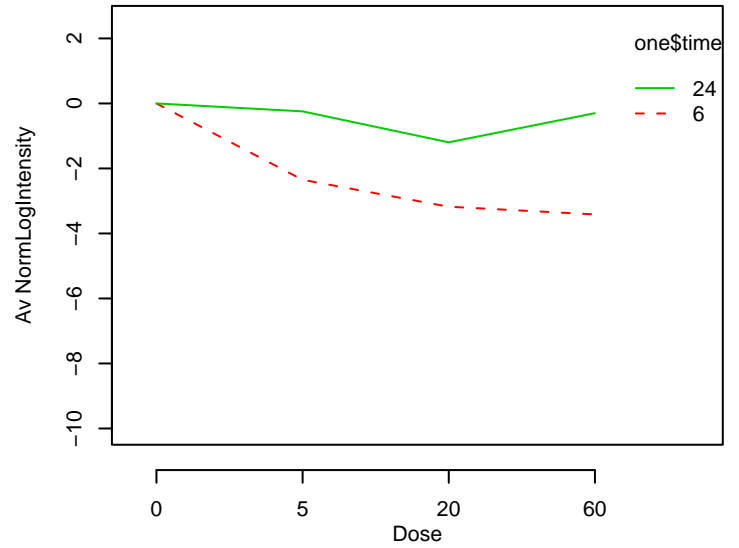

**GO\_0001819 : positive regulation of cytokine production**

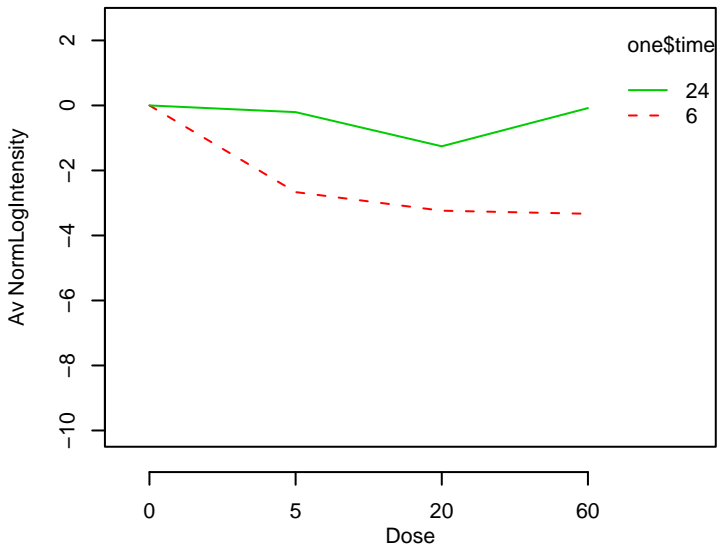

**GO\_0001822 : kidney development**

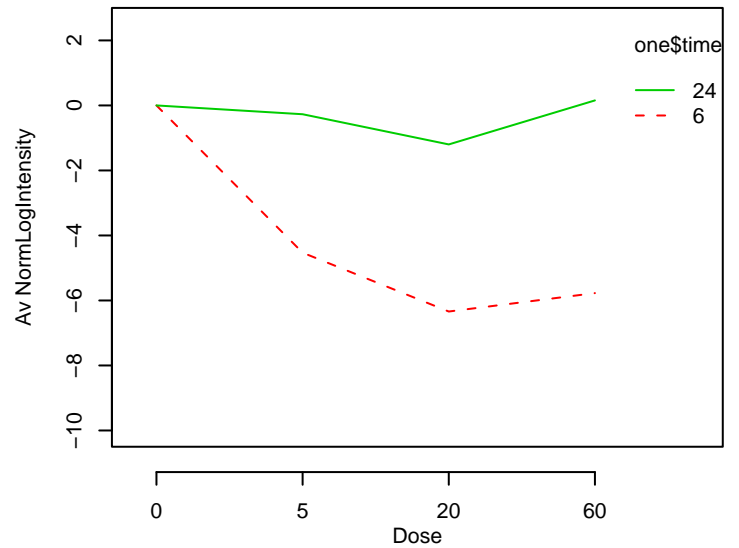

**GO\_0001824 : blastocyst development**

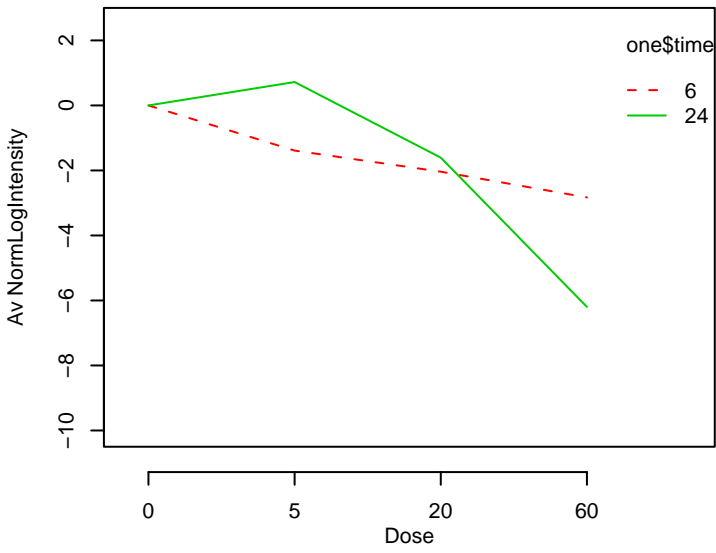

**GO\_0001832 : blastocyst growth**

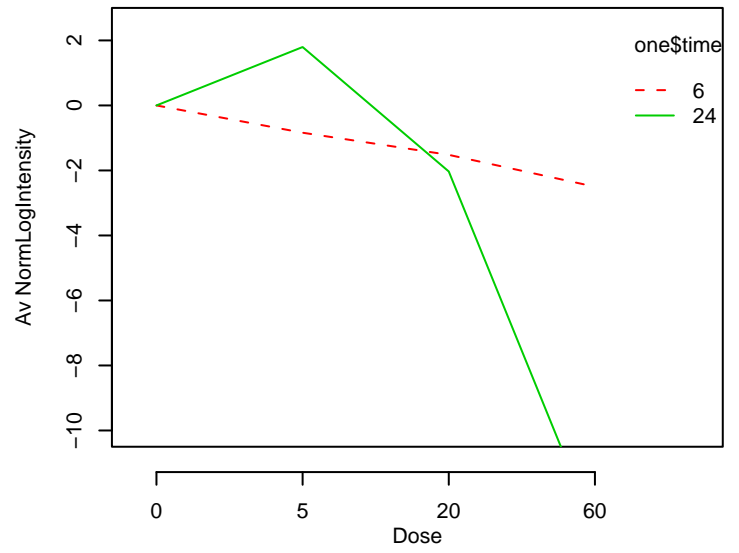

**GO\_0001836 : release of cytochrome c from mitochondria**

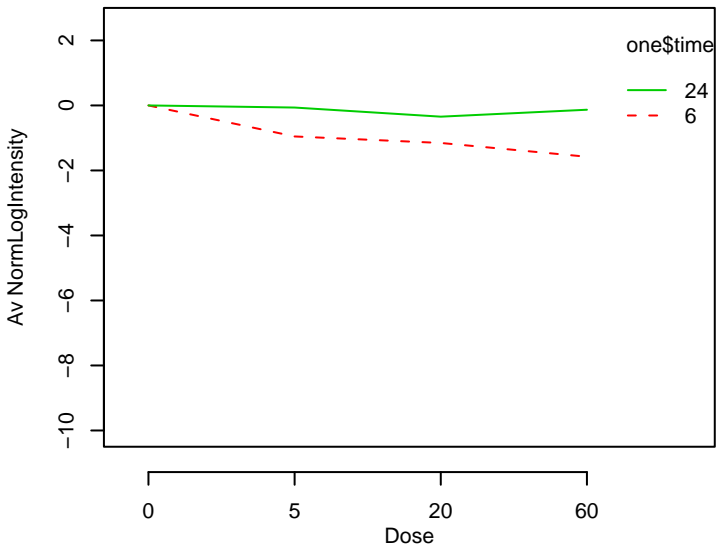

**GO\_0001837 : epithelial to mesenchymal transition**

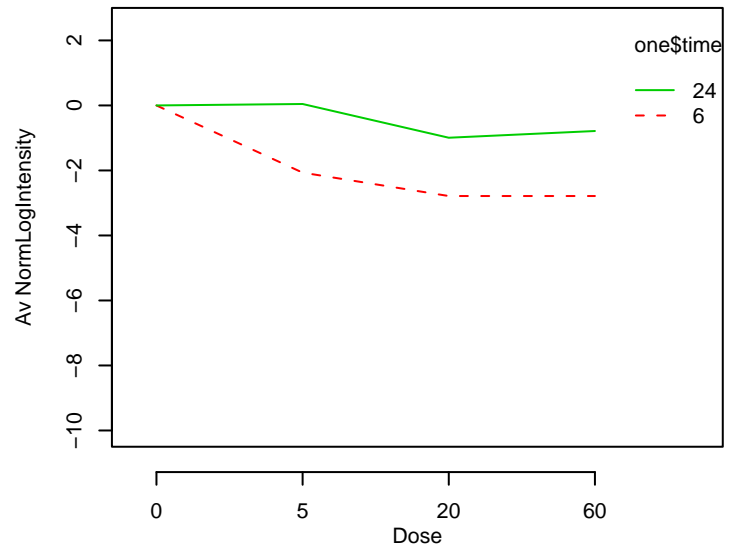

**GO\_0001838 : embryonic epithelial tube formation**

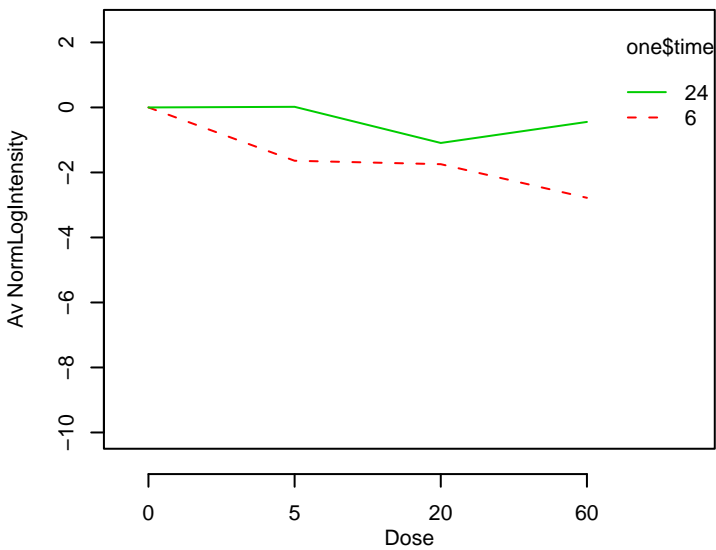

**GO\_0001839 : neural plate morphogenesis**

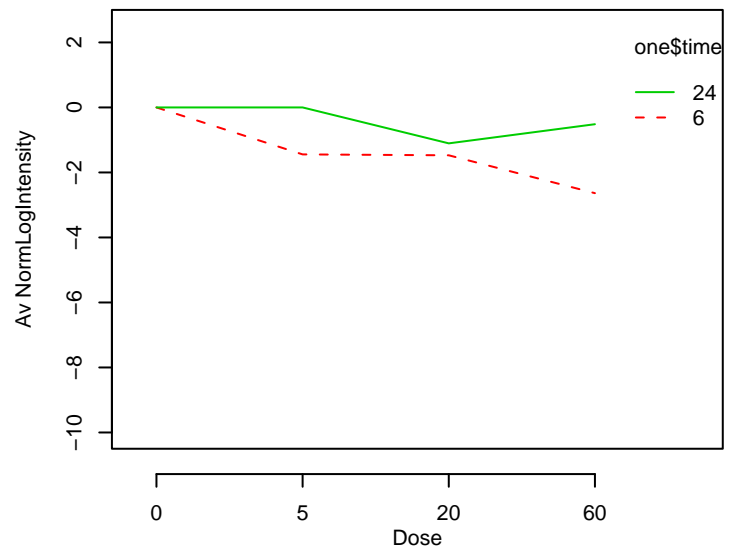

**GO\_0001841 : neural tube formation**

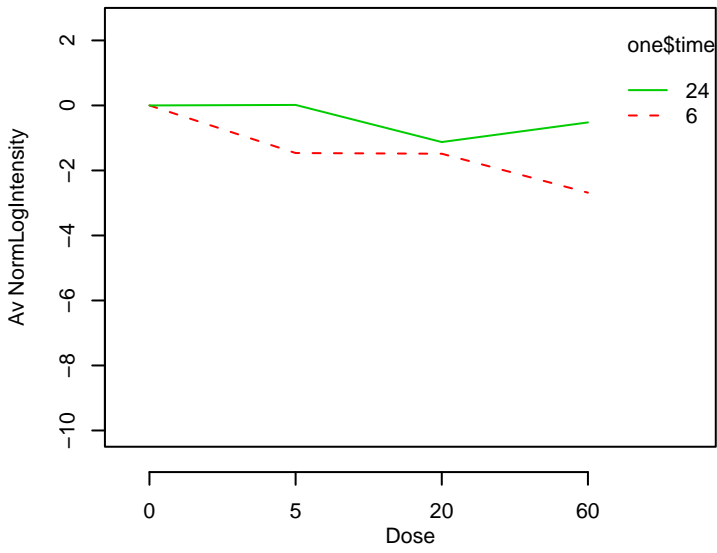

**GO\_0001843 : neural tube closure**

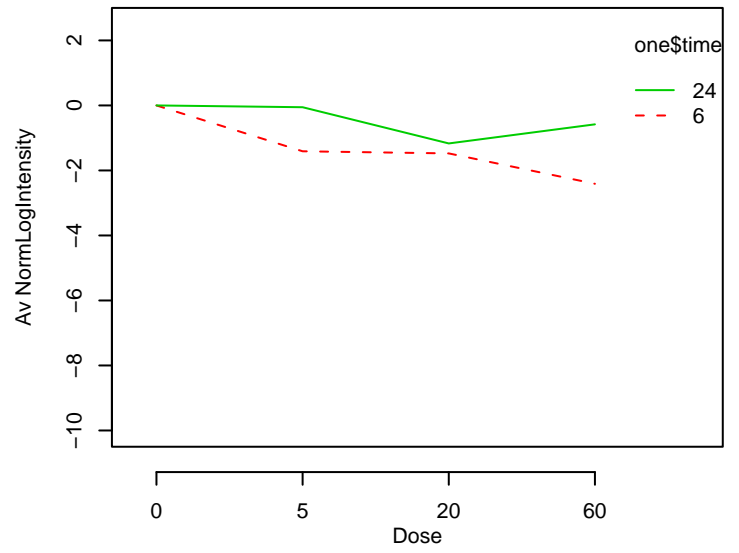

**GO\_0001889 : liver development**

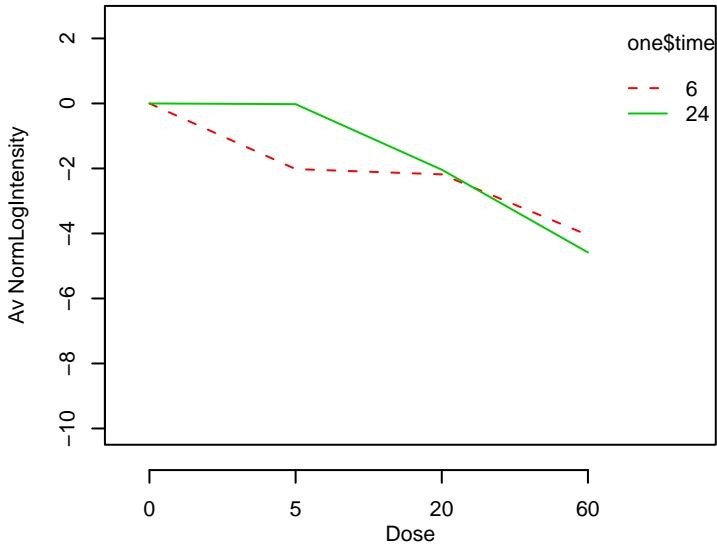

**GO\_0001890 : placenta development**

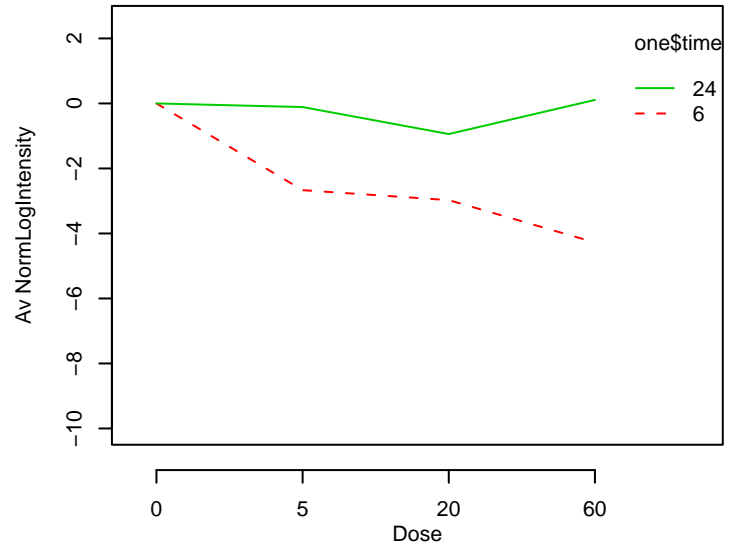

**GO\_0001892 : embryonic placenta development**

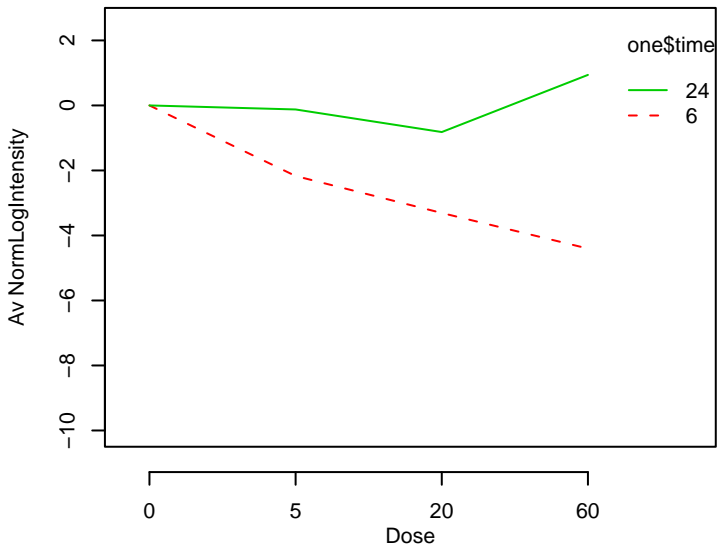

**GO\_0001894 : tissue homeostasis**

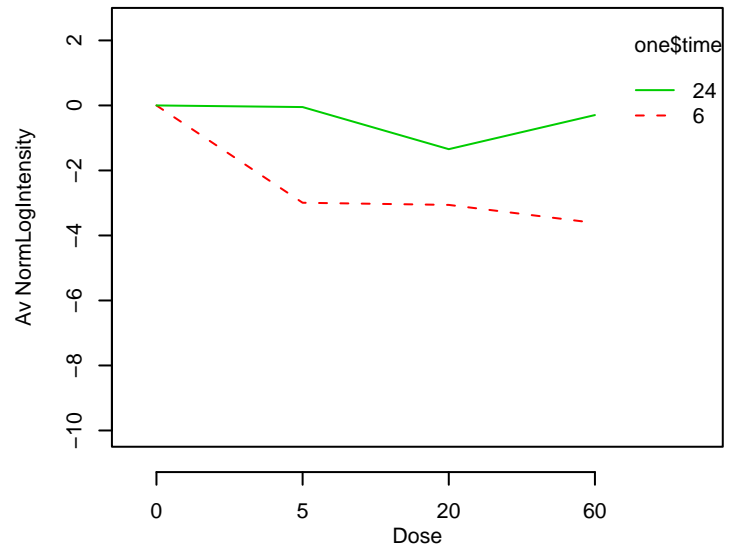

**GO\_0001906 : cell killing**

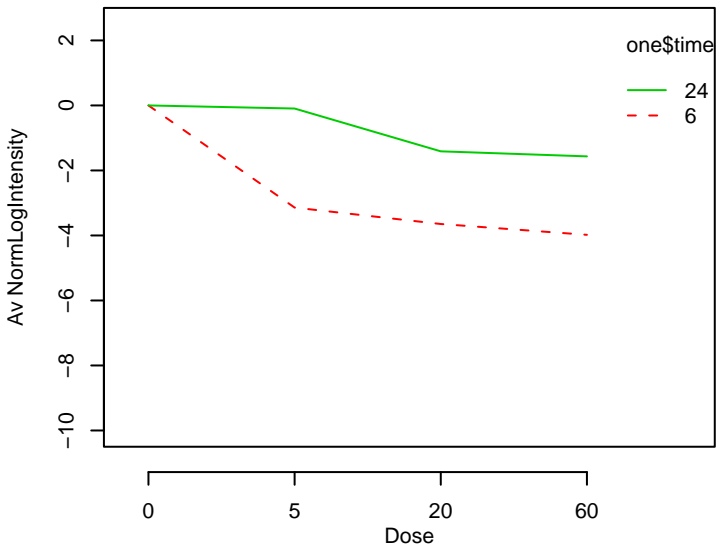

**GO\_0001909 : leukocyte mediated cytotoxicity**

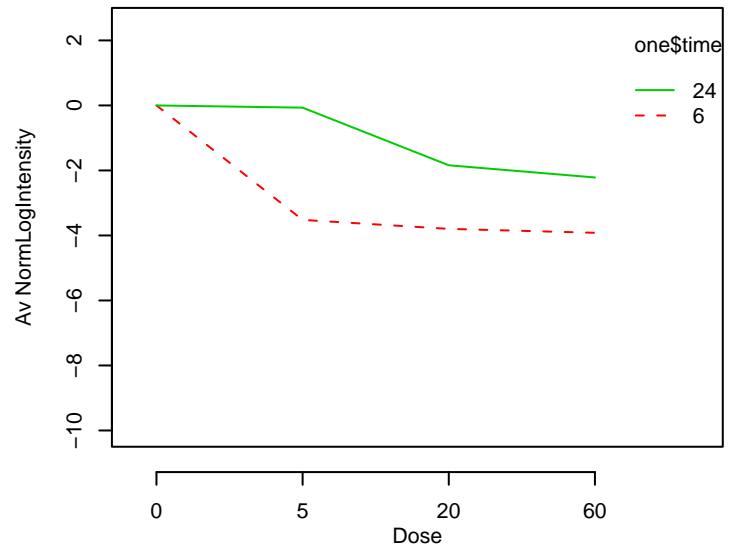

**GO\_0001932 : regulation of protein amino acid phosphorylation** **GO\_0001933 : negative regulation of protein amino acid phosphorylation**

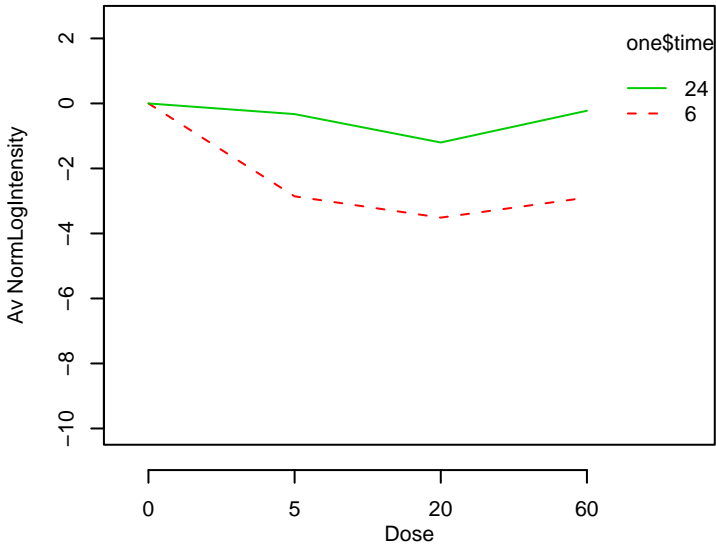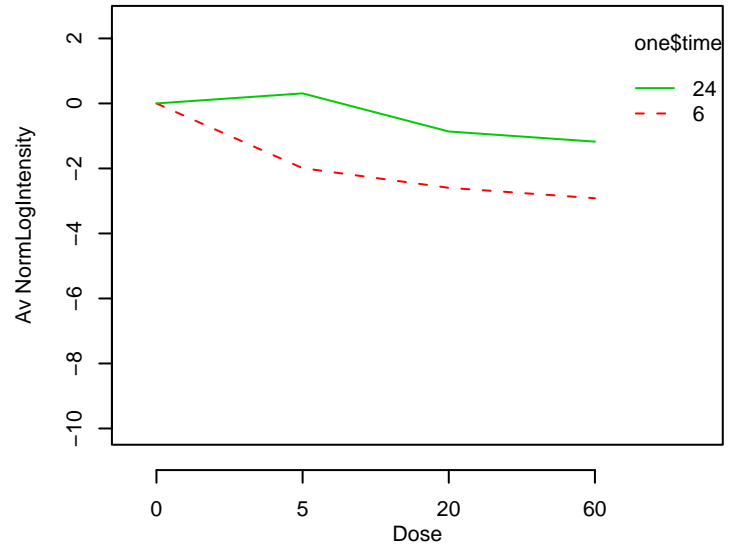

**GO\_0001934 : positive regulation of protein amino acid phosphorylation**

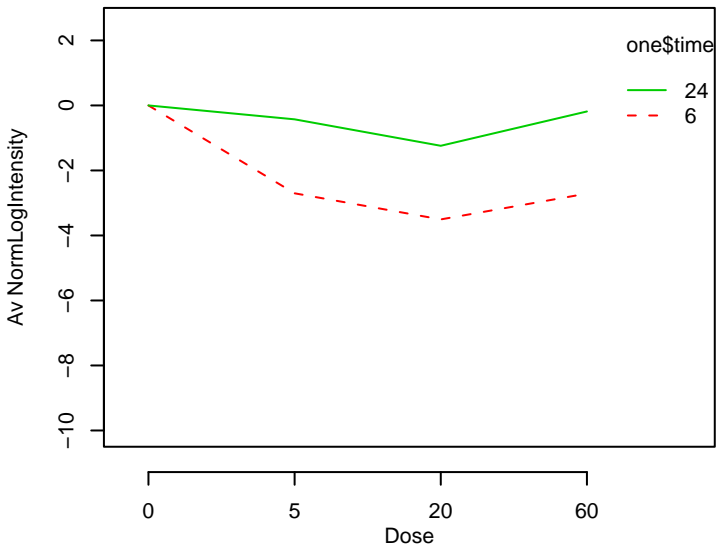

**GO\_0001935 : endothelial cell proliferation**

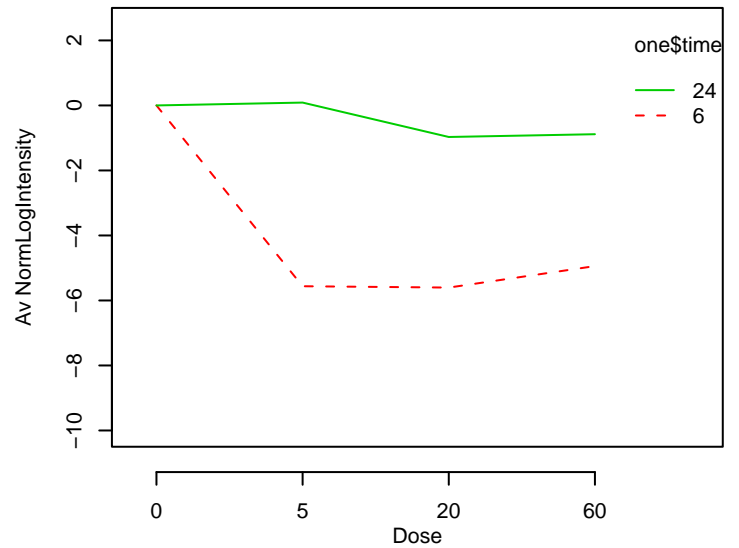

**GO\_0001936 : regulation of endothelial cell proliferation**    **GO\_0001937 : negative regulation of endothelial cell prolife**

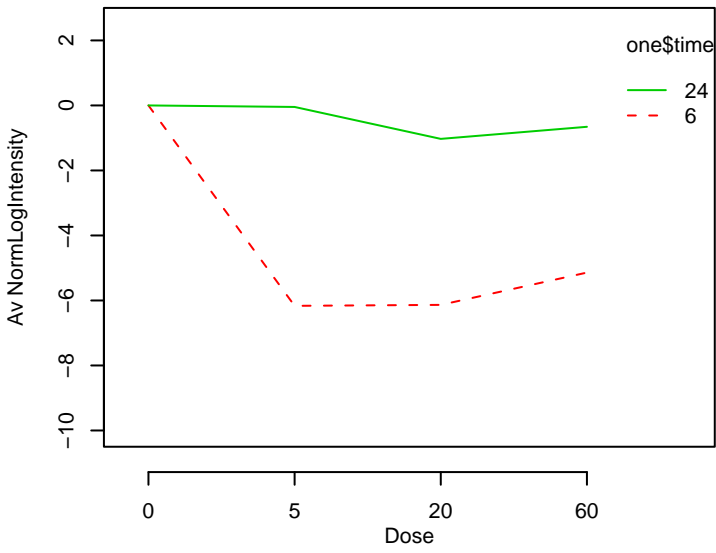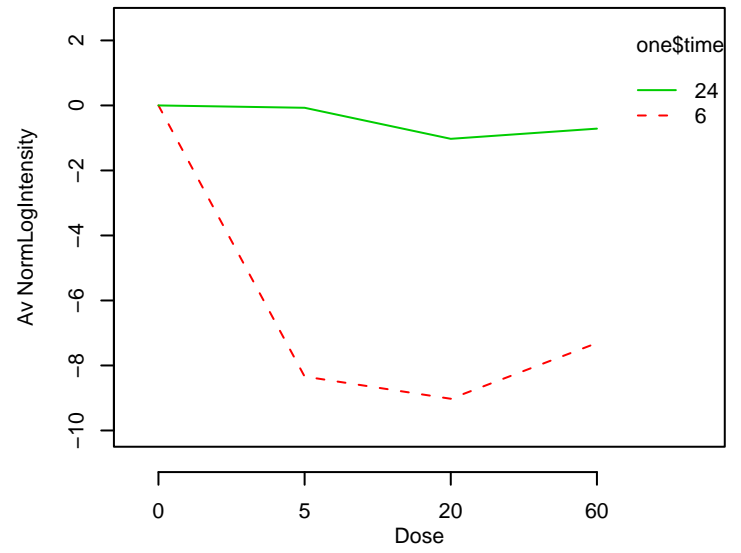

**GO\_0001942 : hair follicle development**

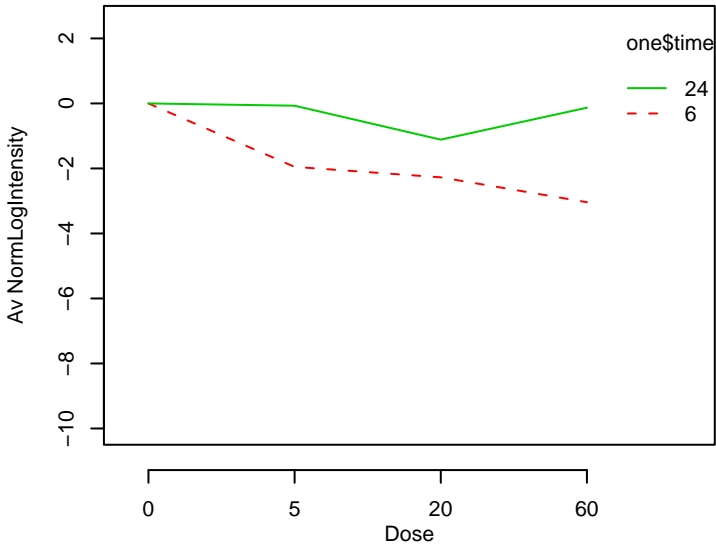

**GO\_0001944 : vasculature development**

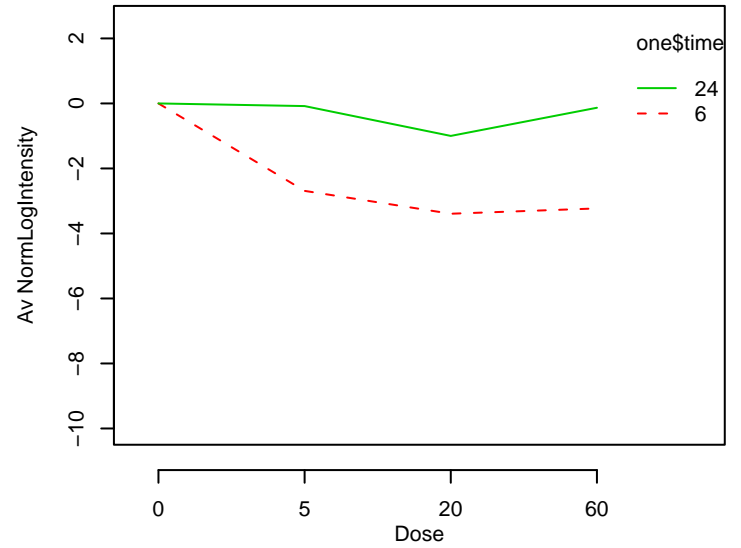

**GO\_0001947 : heart looping**

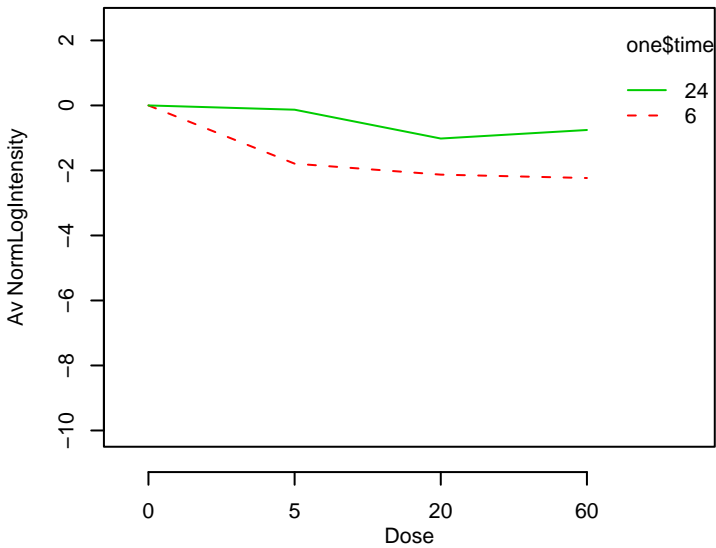

**GO\_0001952 : regulation of cell-matrix adhesion**

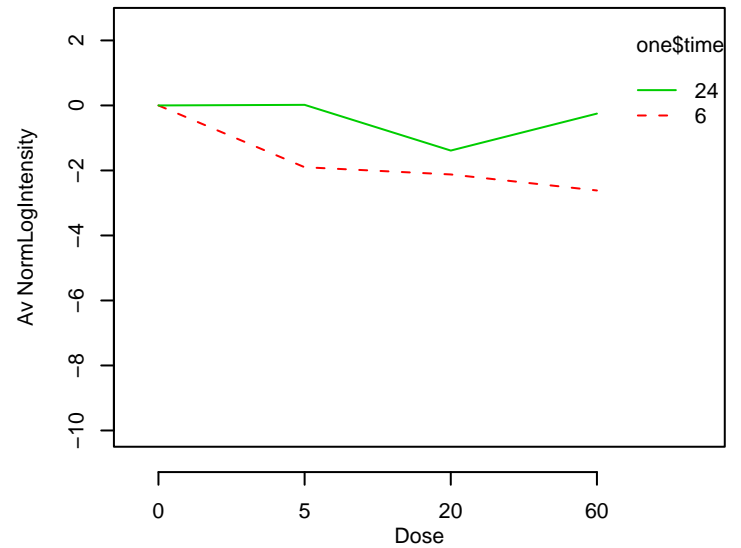

**GO\_0001974 : blood vessel remodeling**

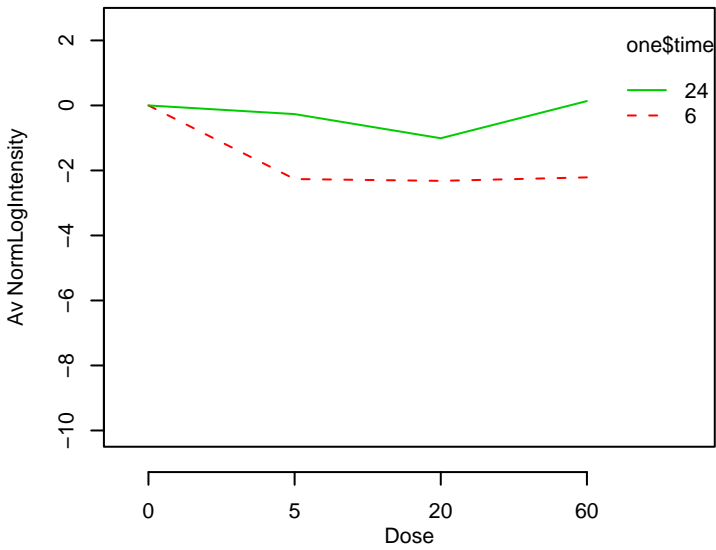

**GO\_0001976 : fast regulation of arterial pressure**

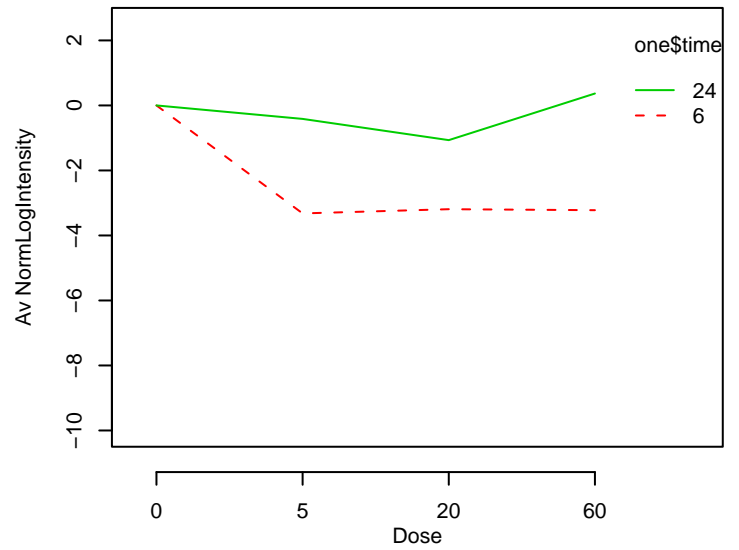

**GO\_0001990 : regulation of blood pressure by hormones** **GO\_0001993 : norepinephrine-epinephrine regulation of blood pressure**

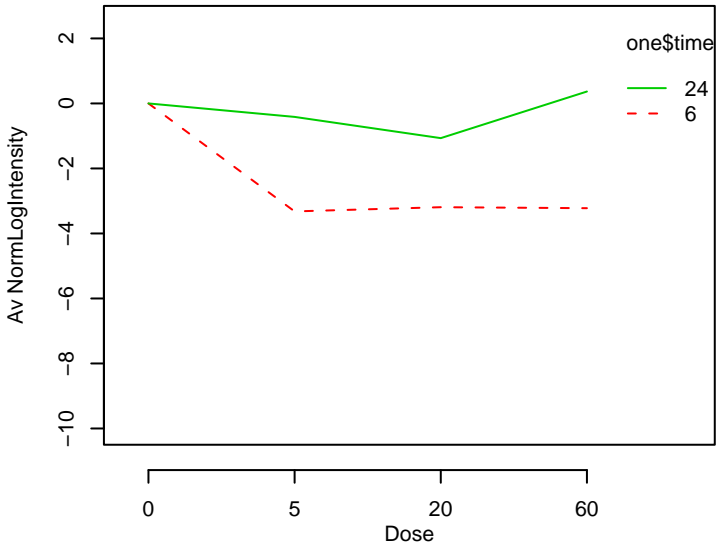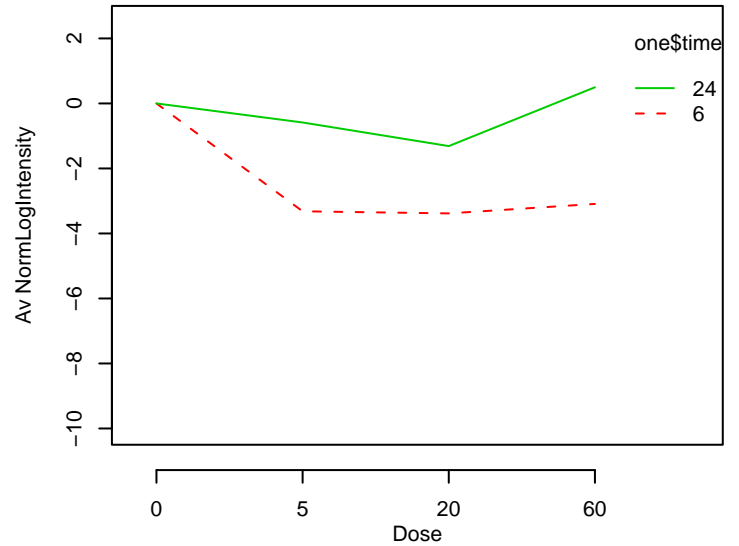

**GO\_0002009 : morphogenesis of an epithelium**

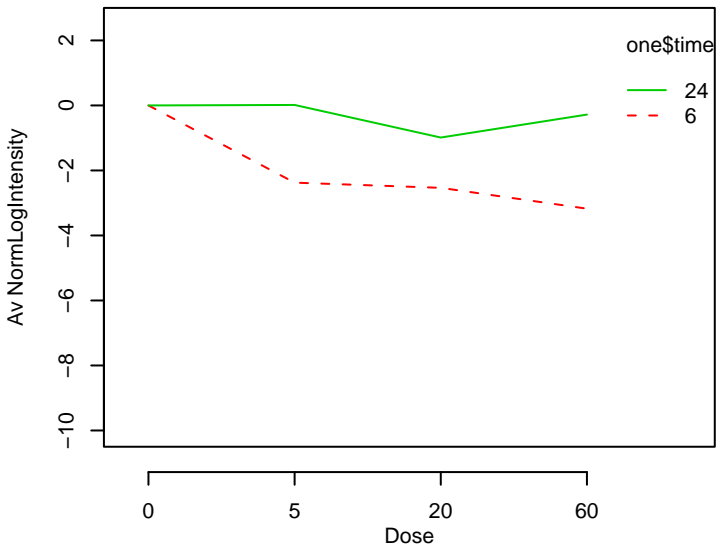

**GO\_0002011 : morphogenesis of an epithelial sheet**

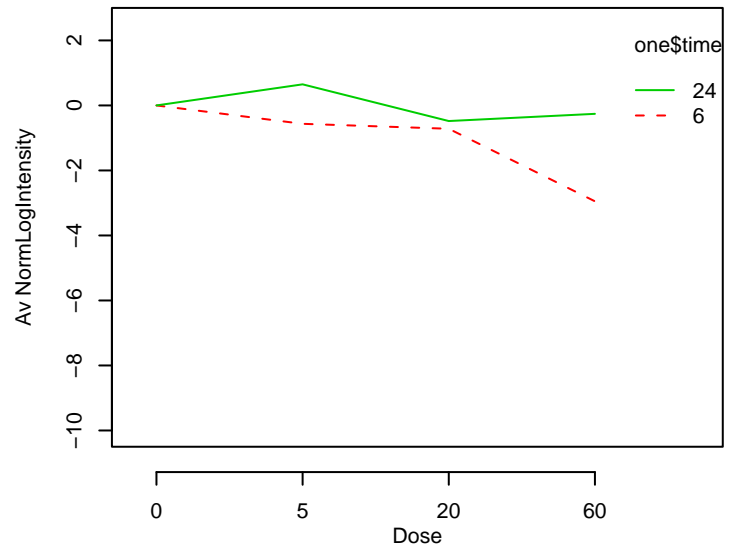

**GO\_0002026 : cardiac inotropy**

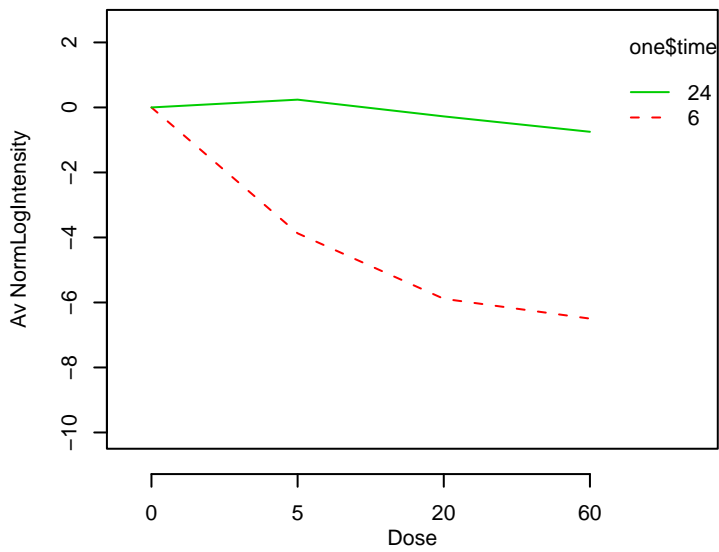

**GO\_0002443 : leukocyte mediated immunity**

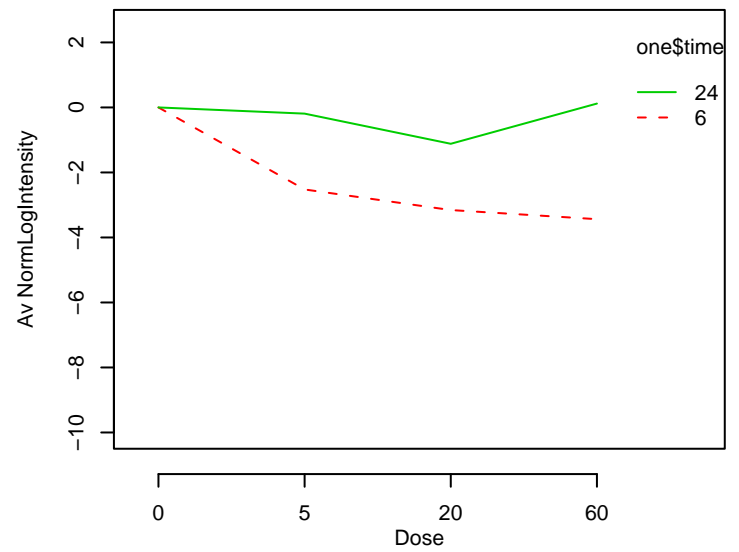

**GO\_0005513 : detection of calcium ion**

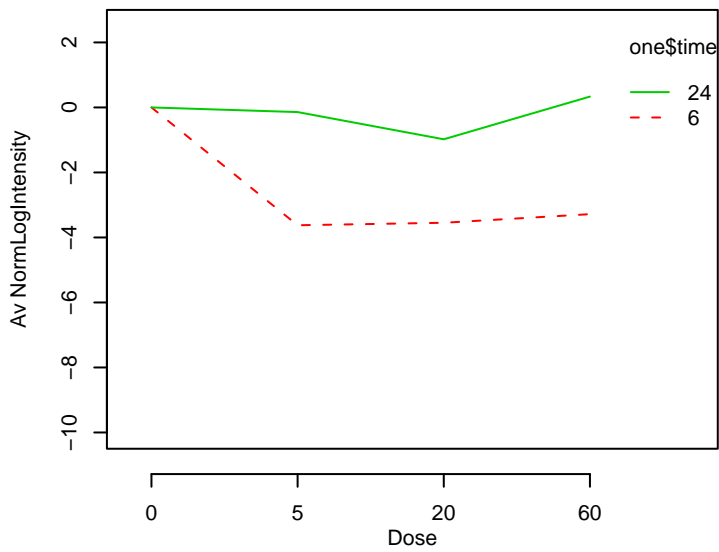

**GO\_0005976 : polysaccharide metabolism**

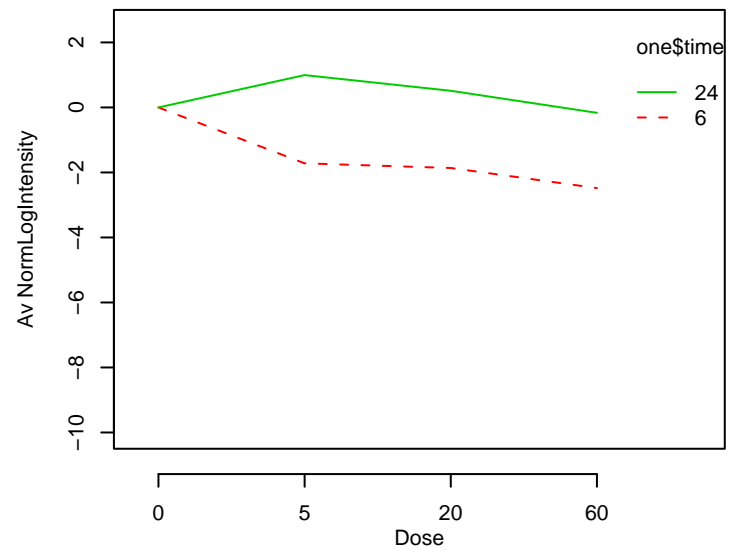

**GO\_0005977 : glycogen metabolism**

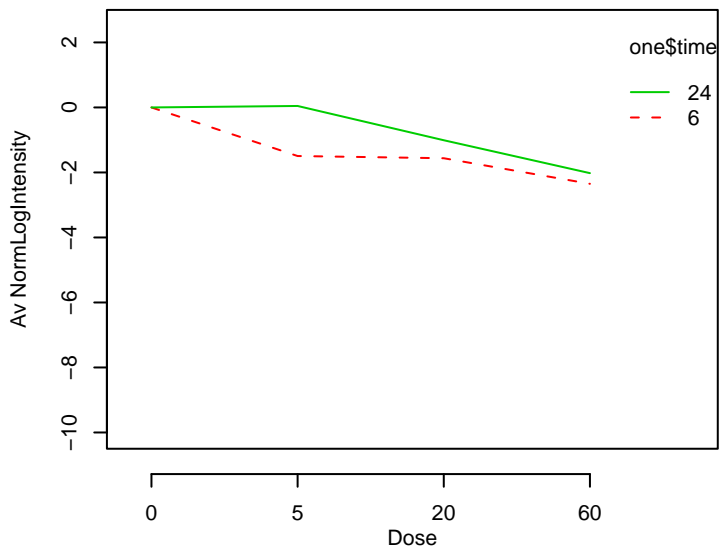

**GO\_0005978 : glycogen biosynthesis**

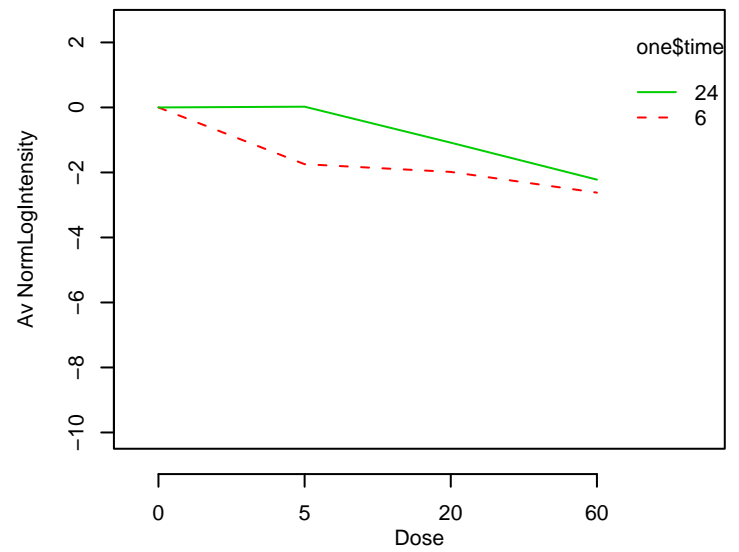



**GO\_0005980 : glycogen catabolism**

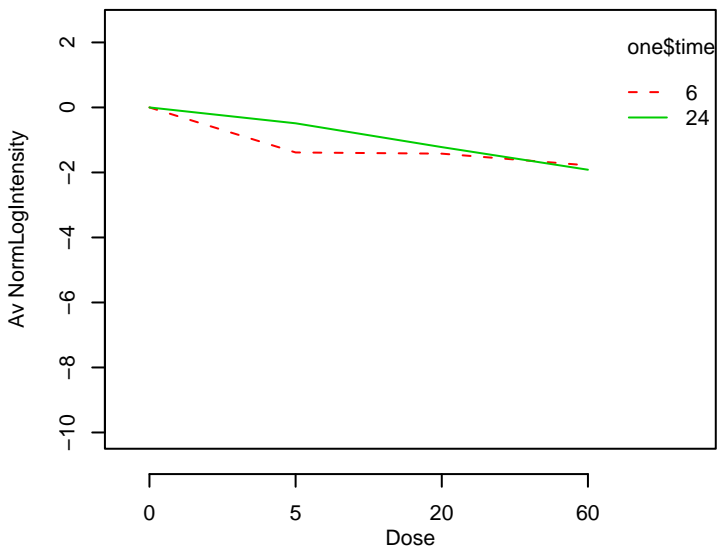

**GO\_0005996 : monosaccharide metabolism**

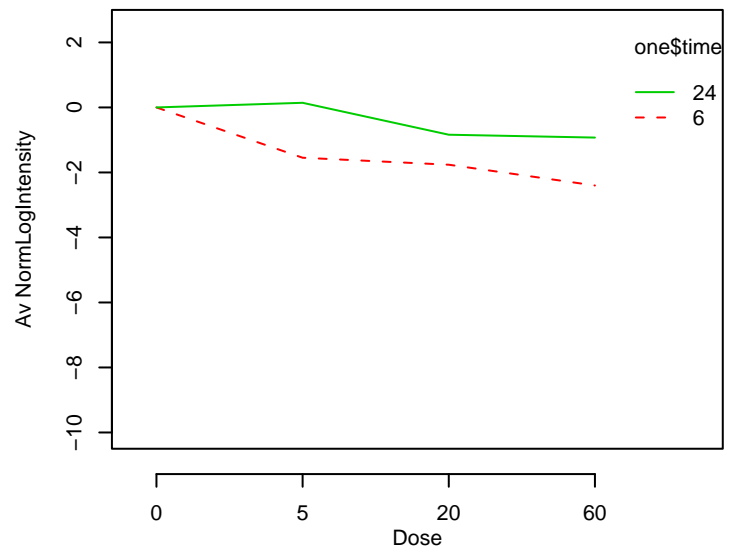

**GO\_0006000 : fructose metabolism**

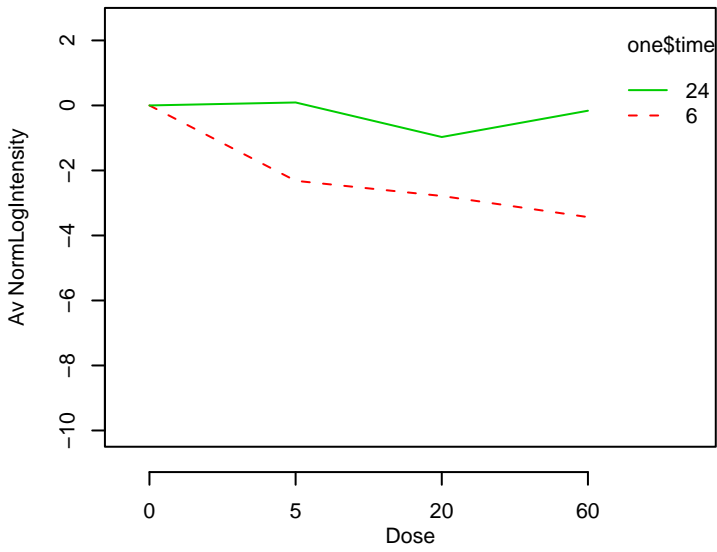

**GO\_0006004 : fucose metabolism**

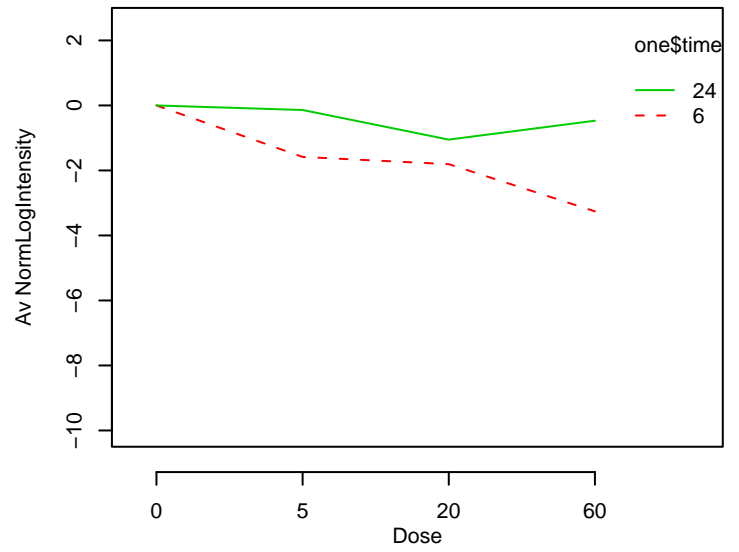

**GO\_0006006 : glucose metabolism**

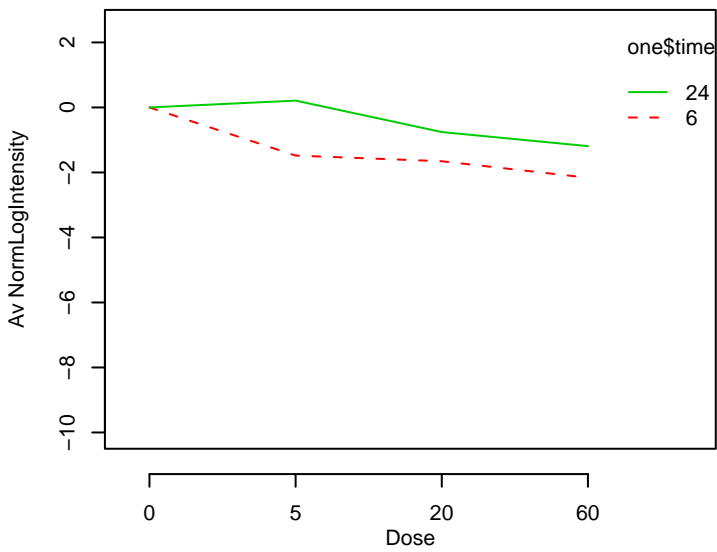

**GO\_0006007 : glucose catabolism**

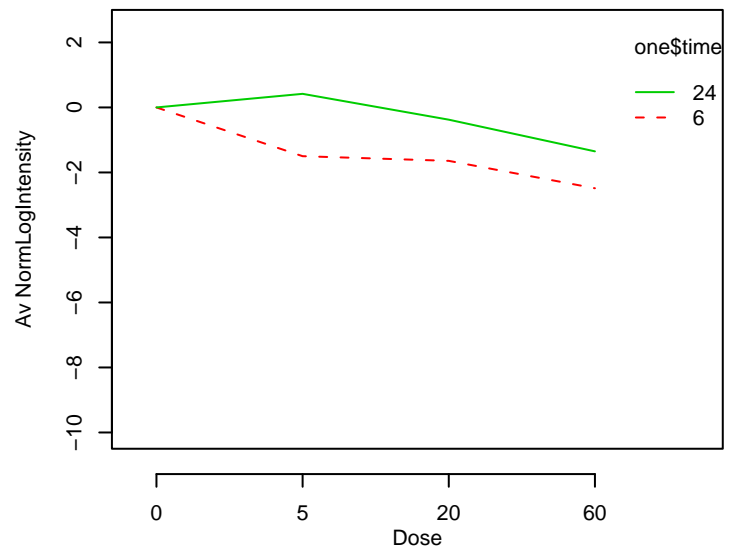

**GO\_0006012 : galactose metabolism**

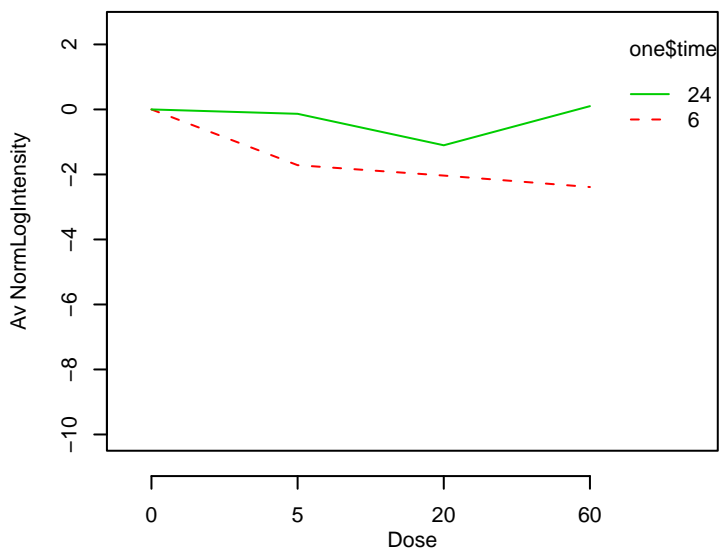

**GO\_0006013 : mannose metabolism**

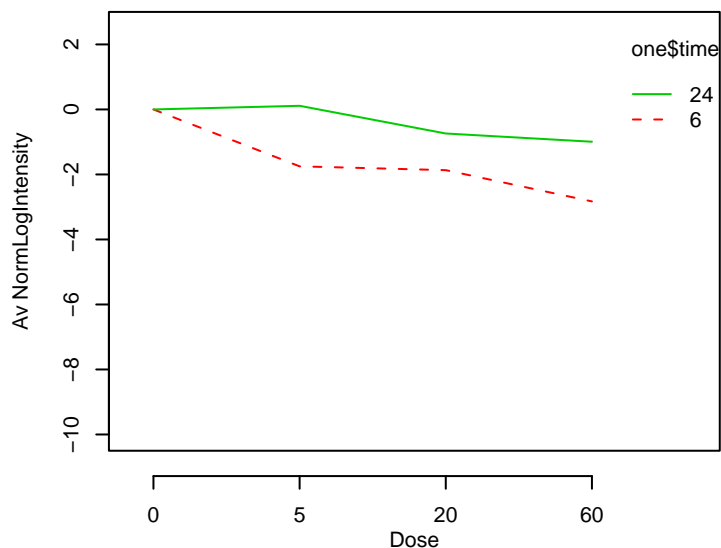

**GO\_0006020 : myo-inositol metabolism**

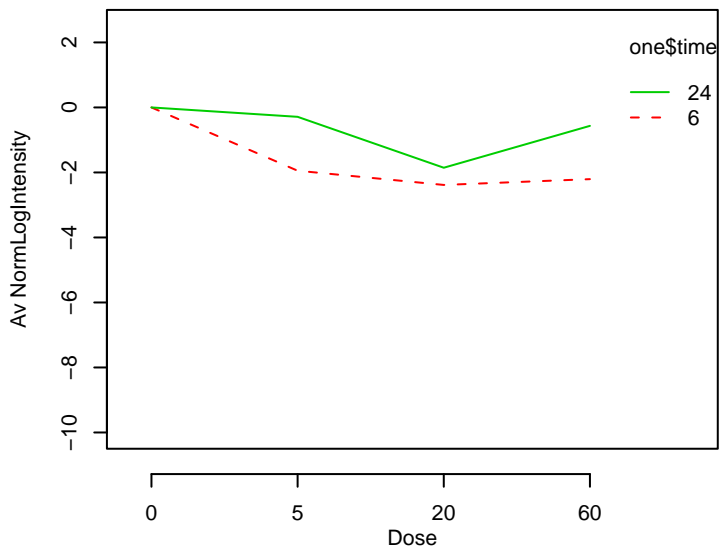

**GO\_0006022 : aminoglycan metabolism**

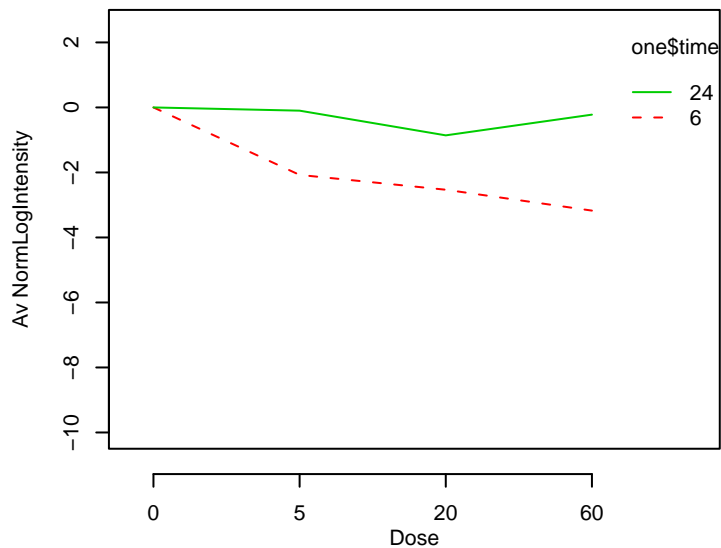

**GO\_0006023 : aminoglycan biosynthesis**

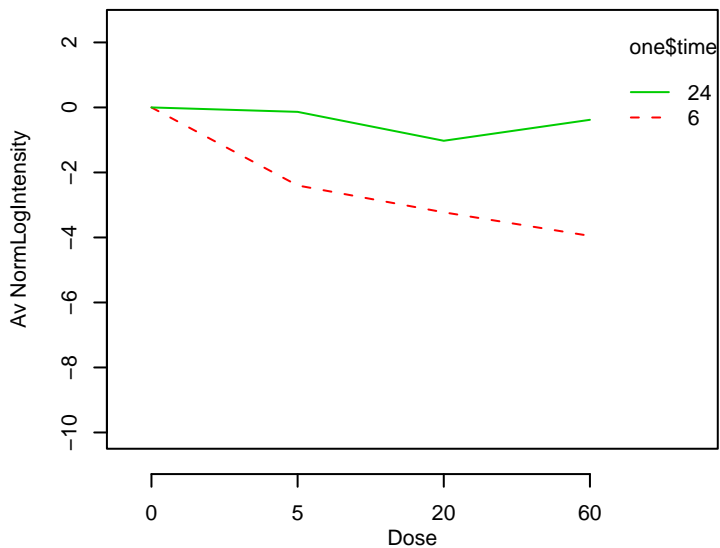

**GO\_0006024 : glycosaminoglycan biosynthesis**

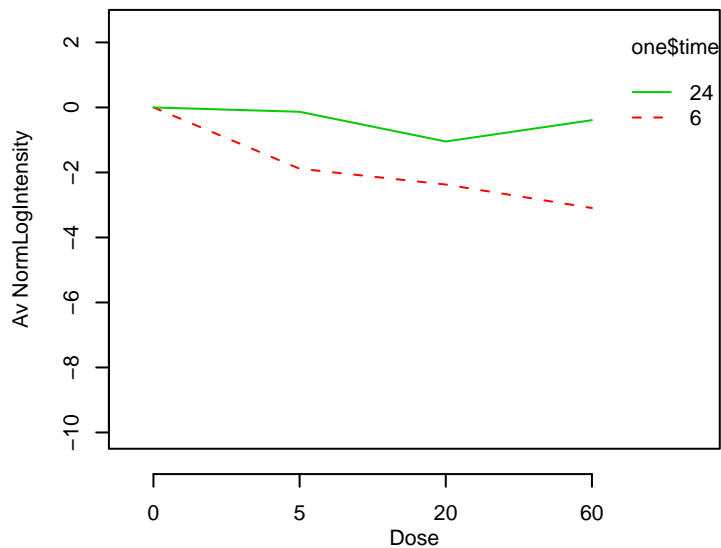

**GO\_0006026 : aminoglycan catabolism**

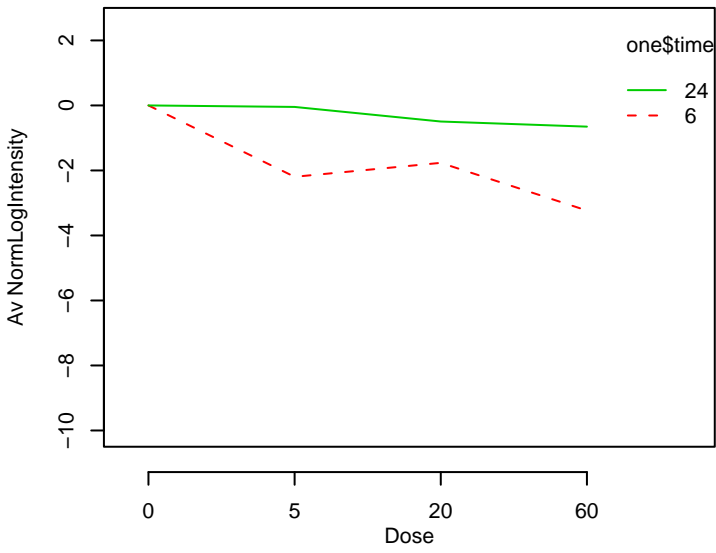

**GO\_0006027 : glycosaminoglycan catabolism**

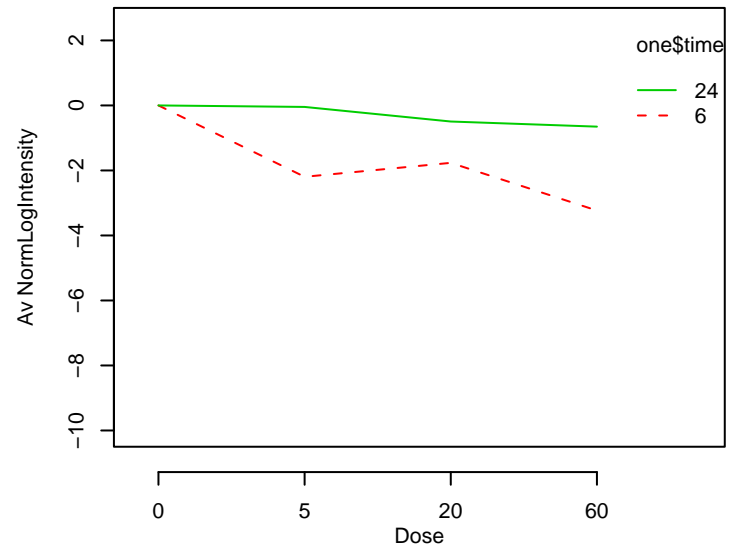

**GO\_0006029 : proteoglycan metabolism**

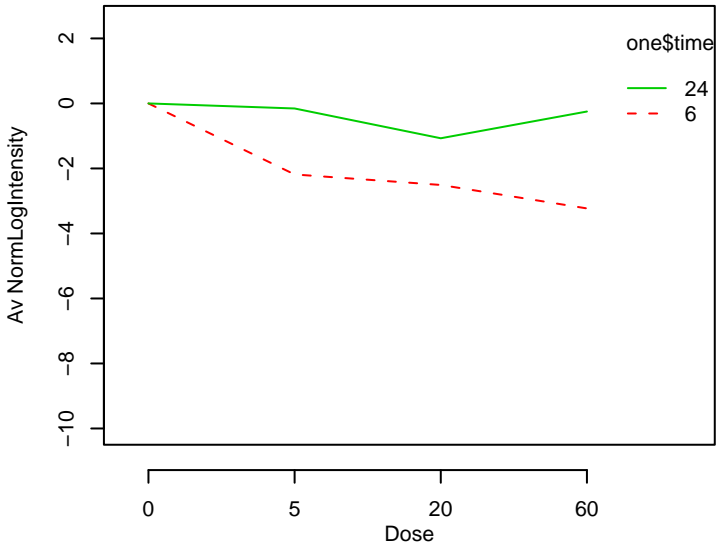

**GO\_0006030 : chitin metabolism**

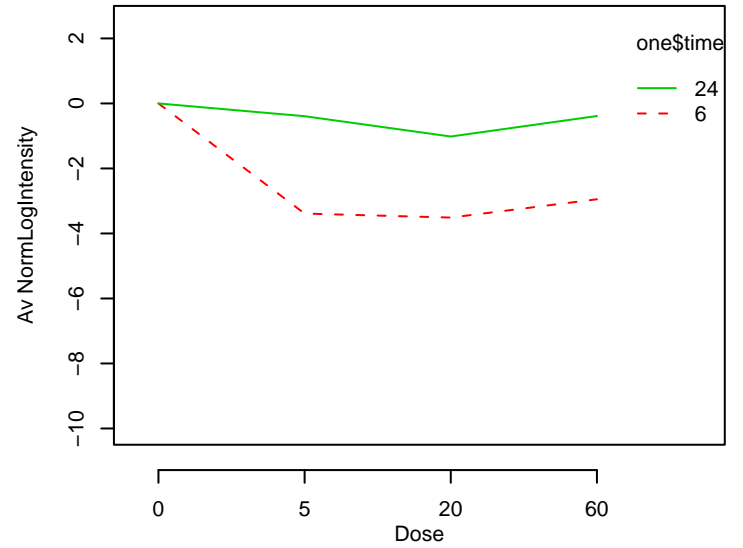

**GO\_0006032 : chitin catabolism**

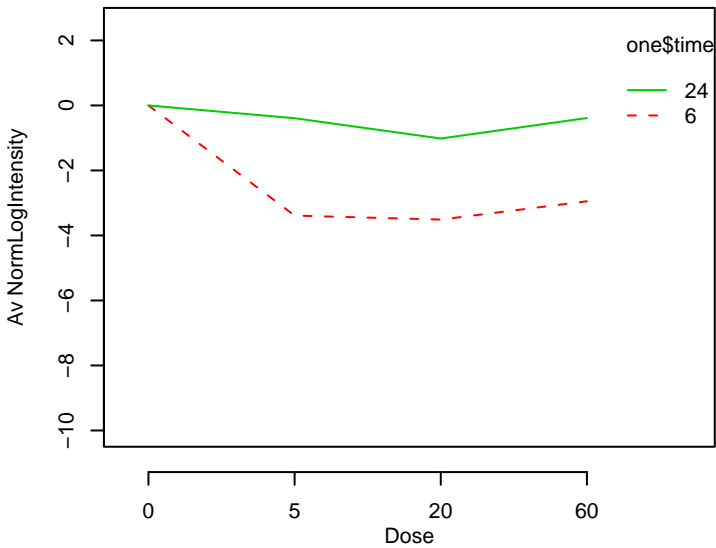

**GO\_0006040 : amino sugar metabolism**

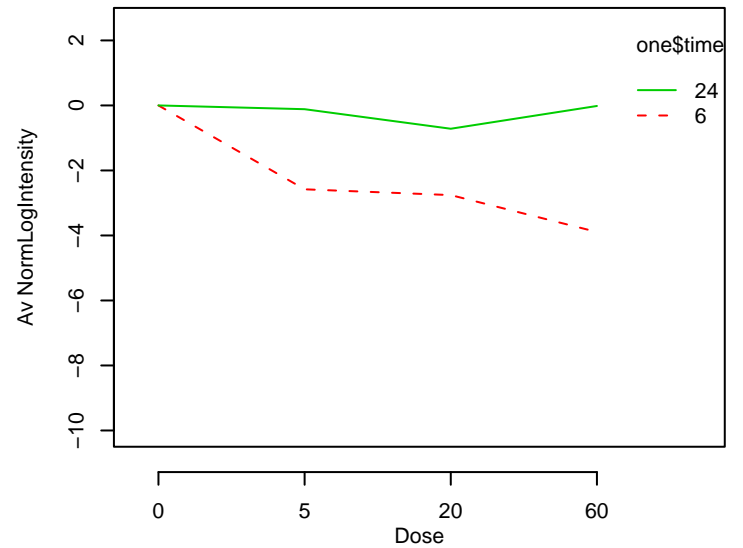

**GO\_0006041 : glucosamine metabolism**

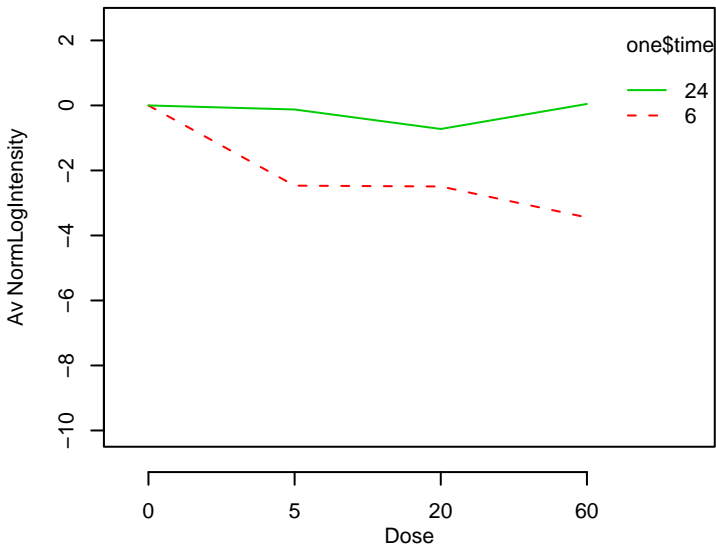

**GO\_0006043 : glucosamine catabolism**

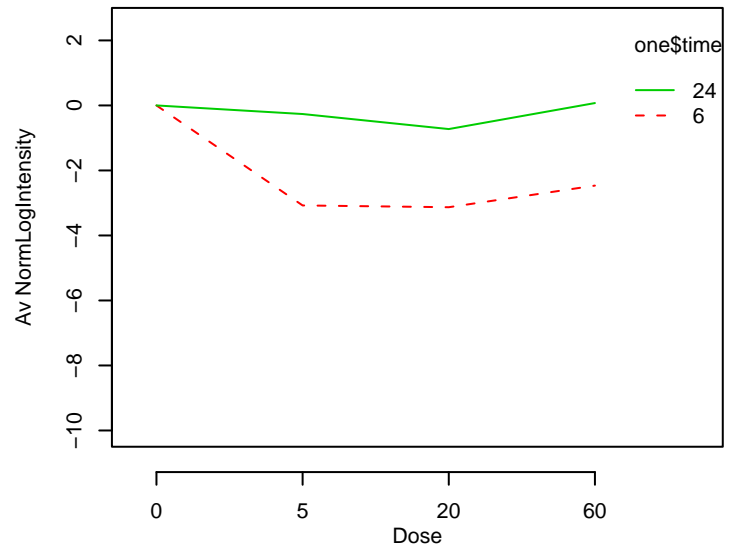

**GO\_0006044 : N-acetylglucosamine metabolism**

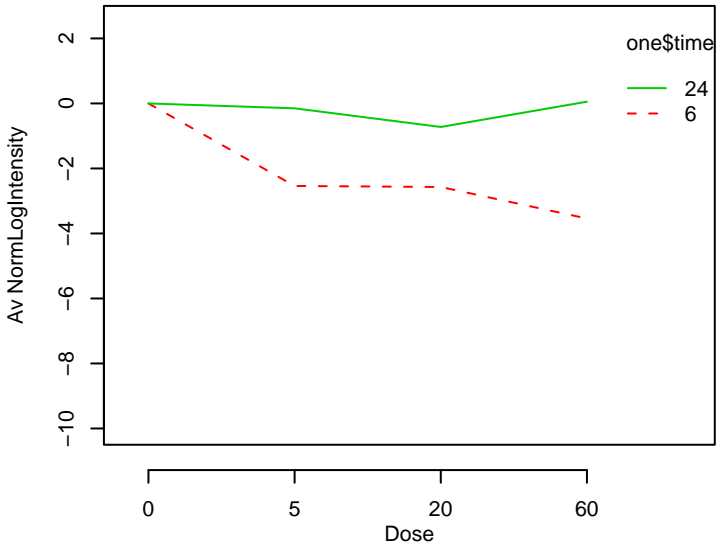

**GO\_0006046 : N-acetylglucosamine catabolism**

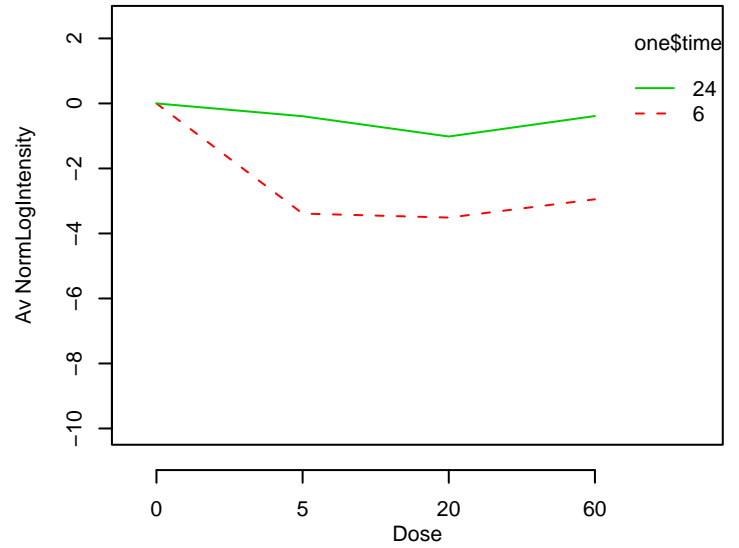

**GO\_0006067 : ethanol metabolism**

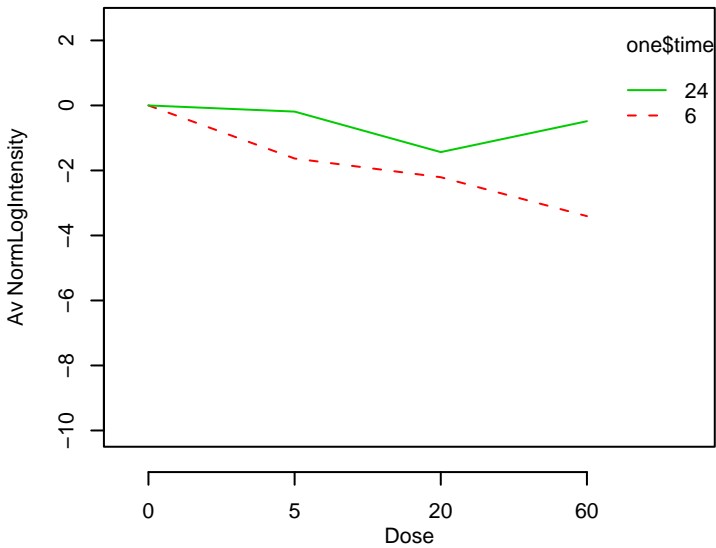

**GO\_0006069 : ethanol oxidation**

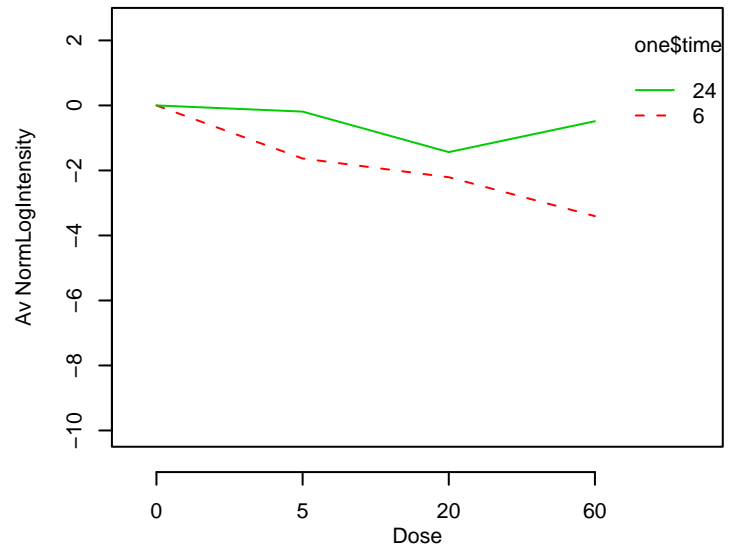

**GO\_0006071 : glycerol metabolism**

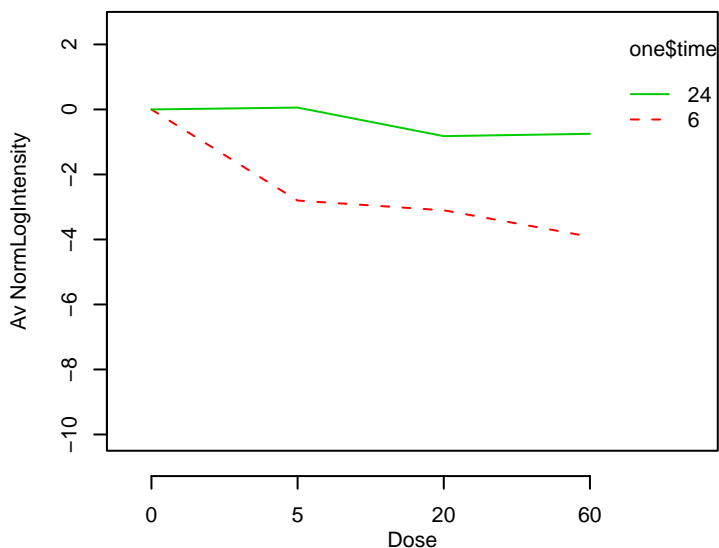

**GO\_0006072 : glycerol-3-phosphate metabolism**

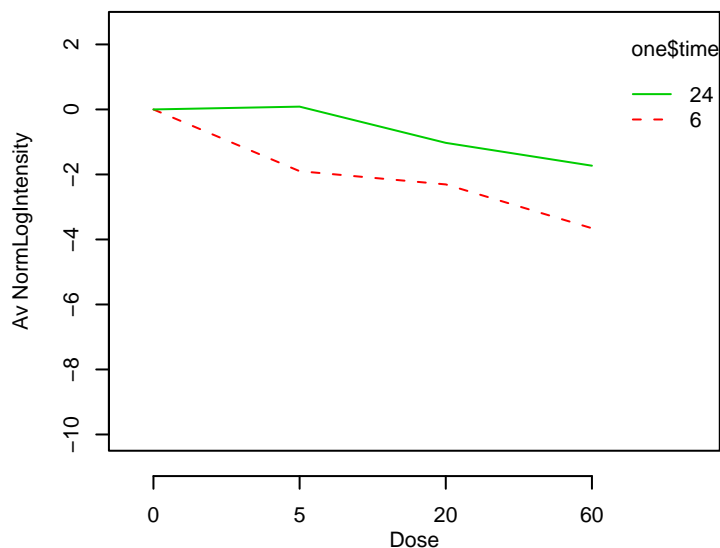

**GO\_0006073 : glucan metabolism**

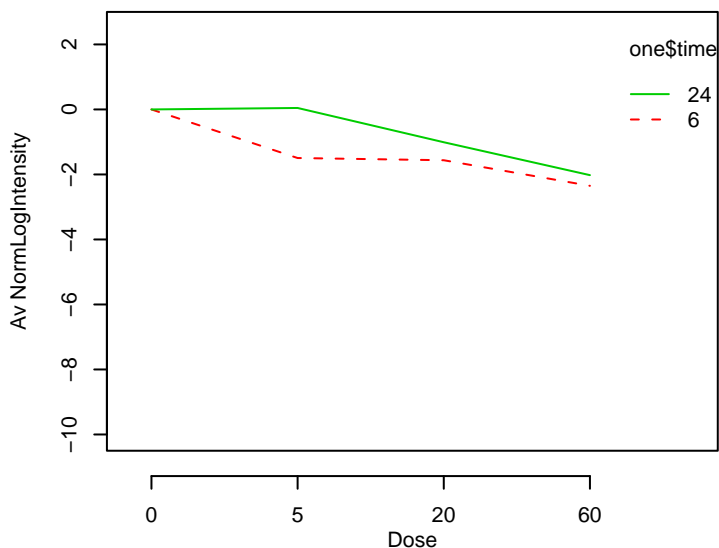

**GO\_0006081 : aldehyde metabolism**

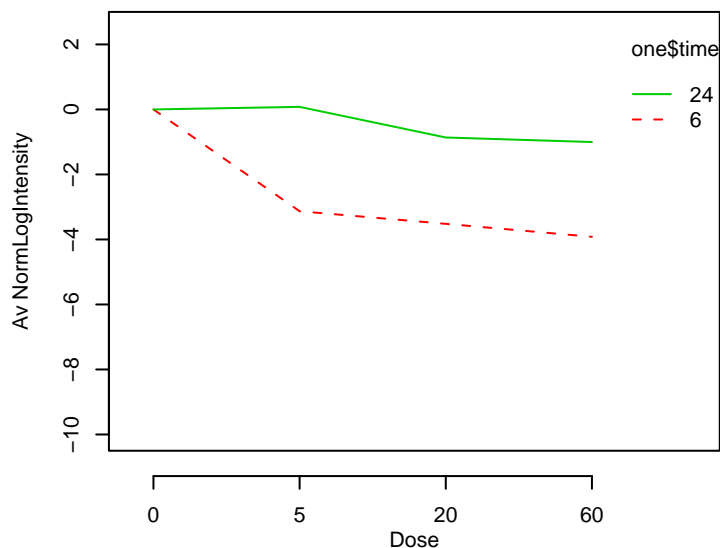

**GO\_0006084 : acetyl-CoA metabolism**

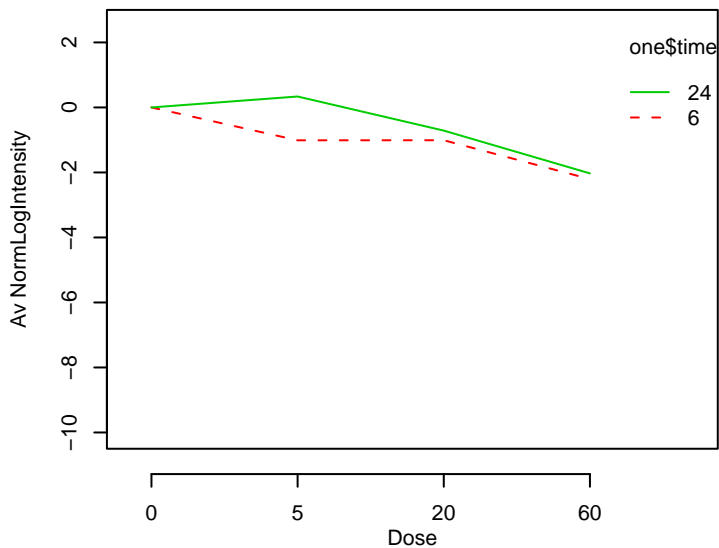

**GO\_0006090 : pyruvate metabolism**

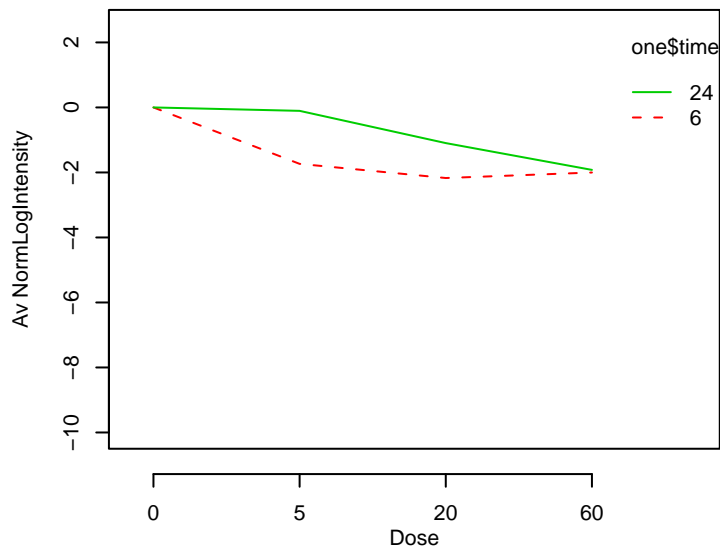

**GO\_0006092 : main pathways of carbohydrate metabolism**

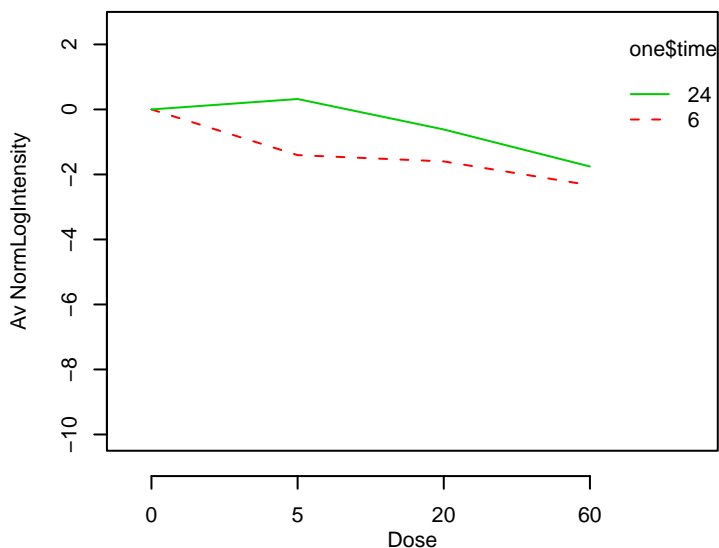

**GO\_0006094 : gluconeogenesis**

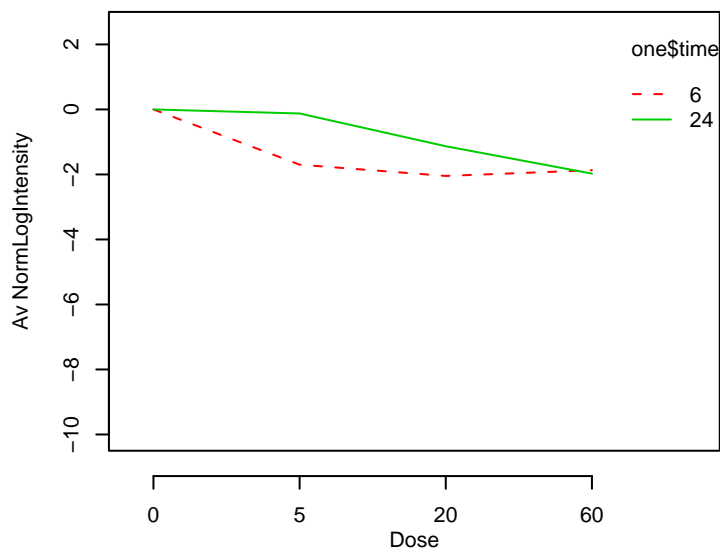

**GO\_0006096 : glycolysis**

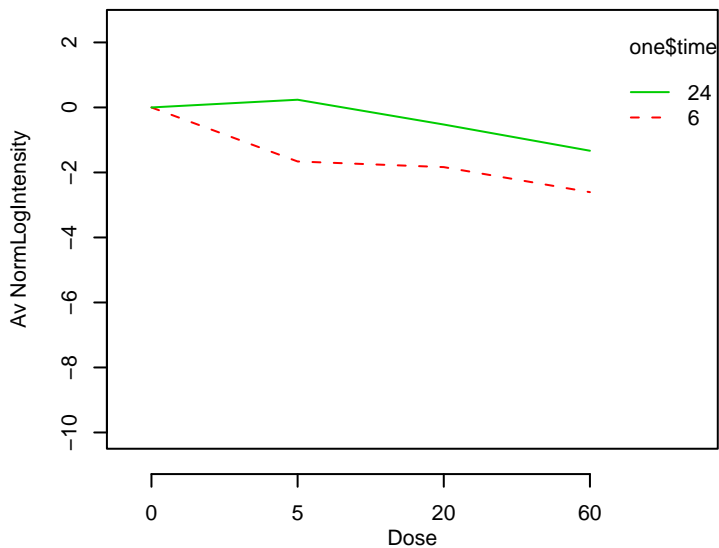

**GO\_0006098 : pentose-phosphate shunt**

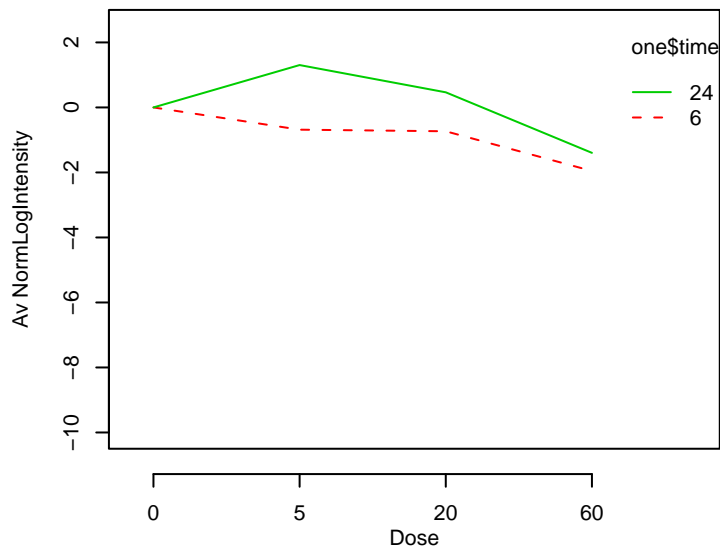

**GO\_0006099 : tricarboxylic acid cycle**

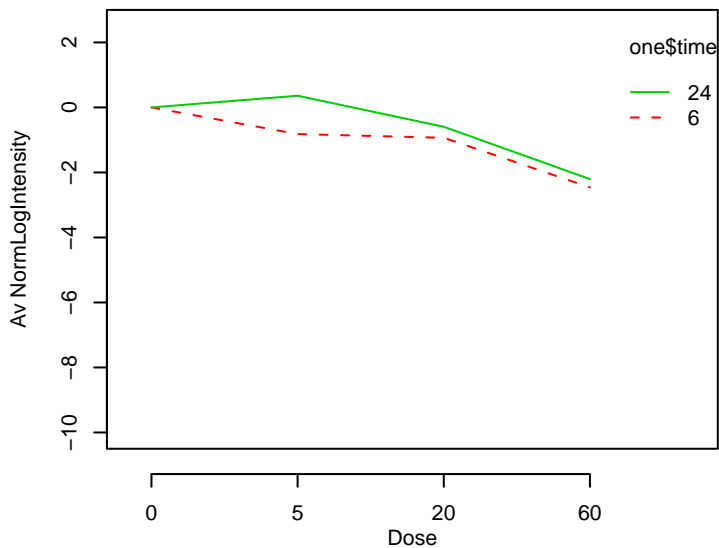

**GO\_0006100 : tricarboxylic acid cycle intermediate metaboli**

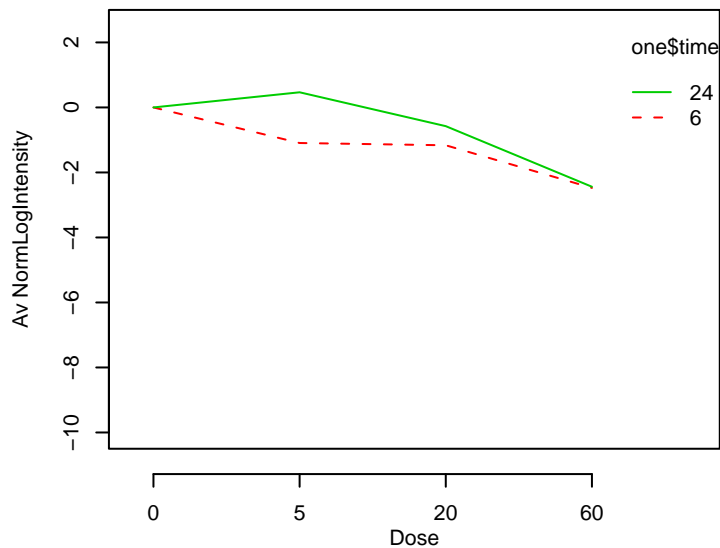

**GO\_0006108 : malate metabolism**

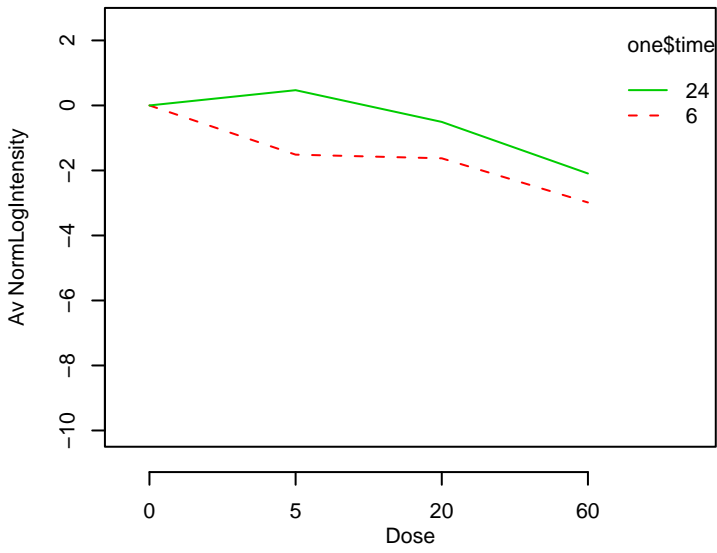

**GO\_0006109 : regulation of carbohydrate metabolism**

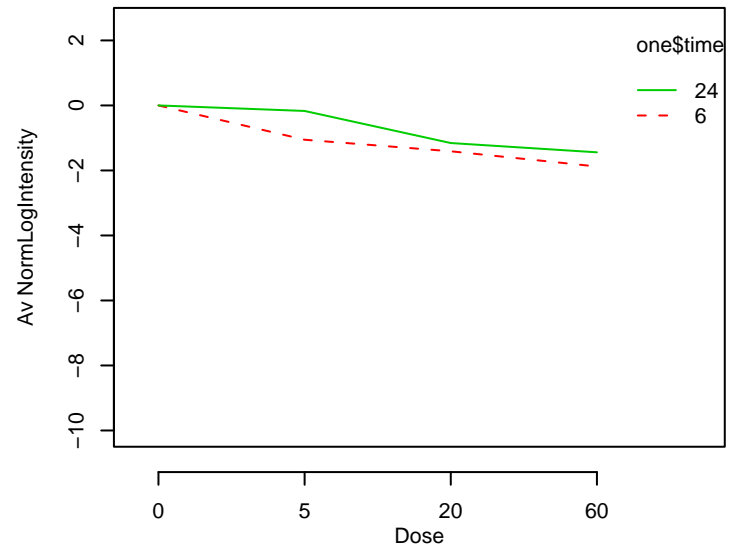

**GO\_0006112 : energy reserve metabolism**

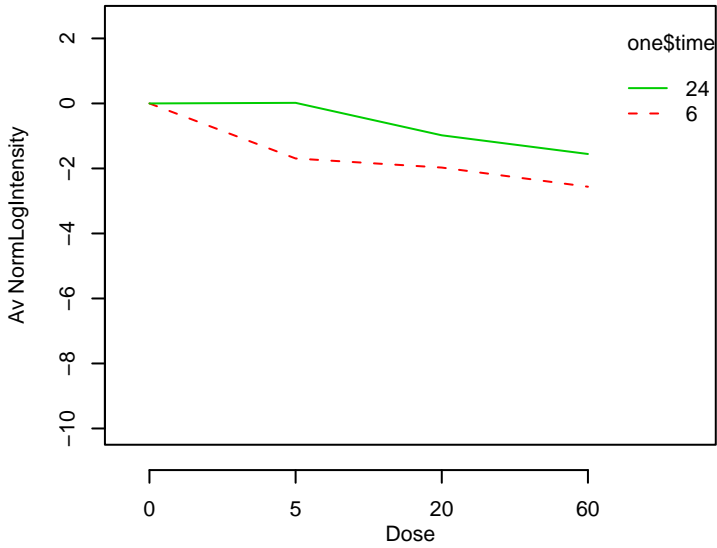

**GO\_0006119 : oxidative phosphorylation**

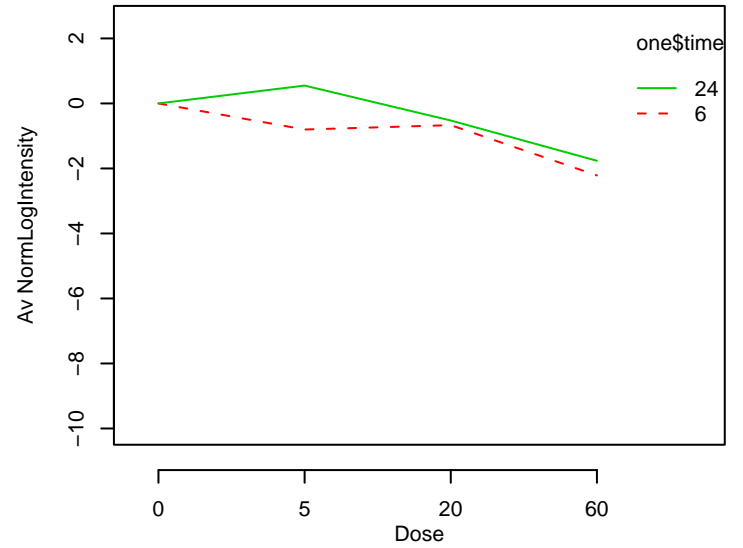

**GO\_0006120 : mitochondrial electron transport, NADH to ubi**

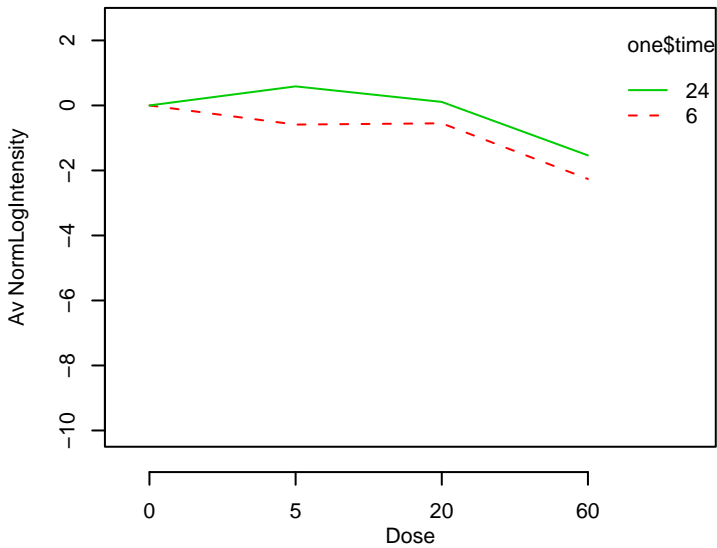

**GO\_0006140 : regulation of nucleotide metabolism**

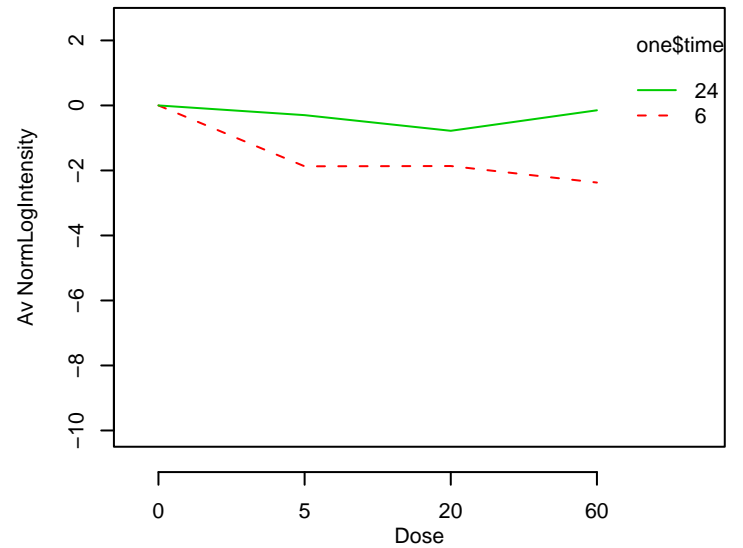

**GO\_0006144 : purine base metabolism**

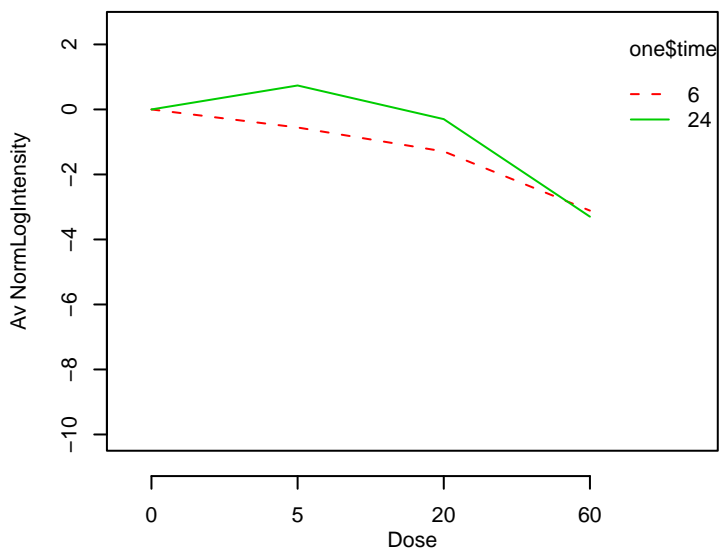

**GO\_0006163 : purine nucleotide metabolism**

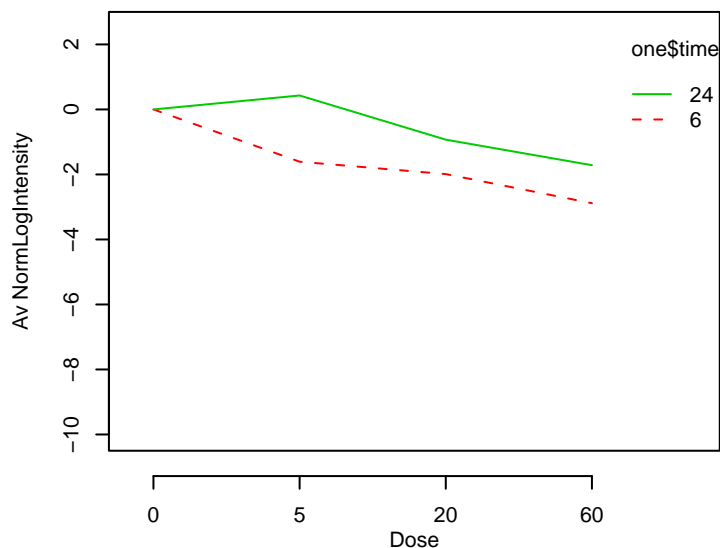

**GO\_0006164 : purine nucleotide biosynthesis**

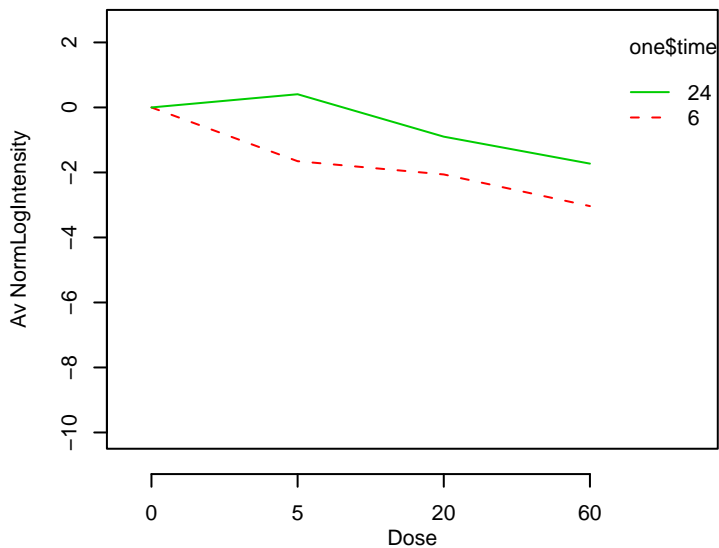

**GO\_0006171 : cAMP biosynthesis**

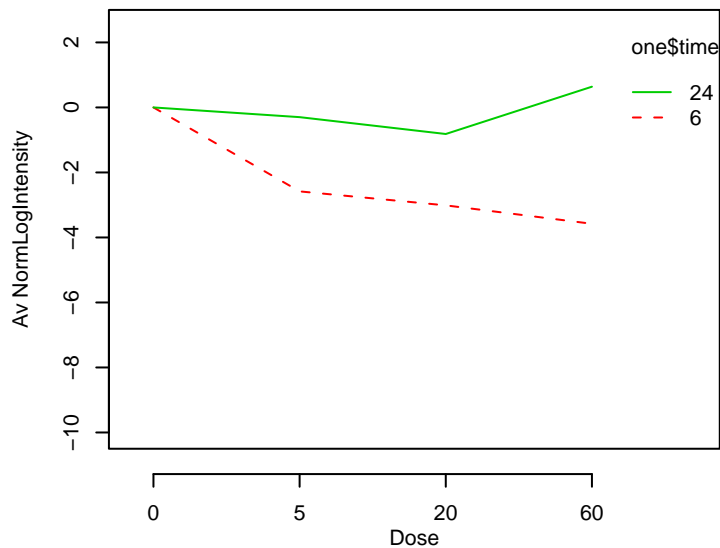

**GO\_0006182 : cGMP biosynthesis**

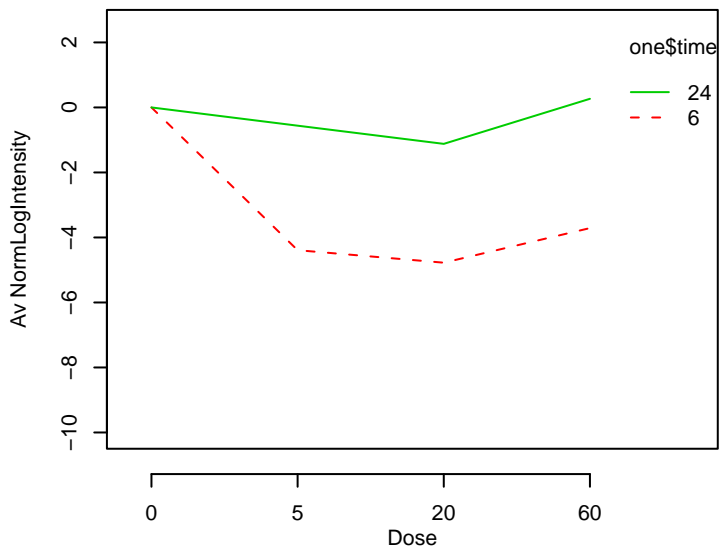

**GO\_0006183 : GTP biosynthesis**

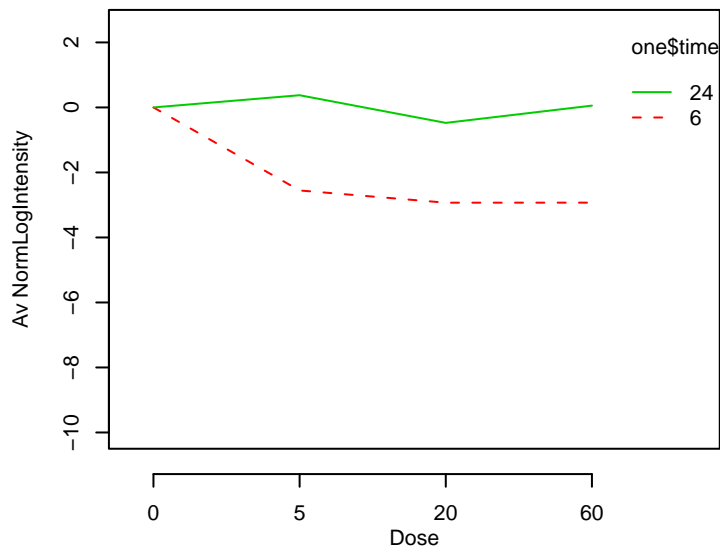



**GO\_0006195 : purine nucleotide catabolism**

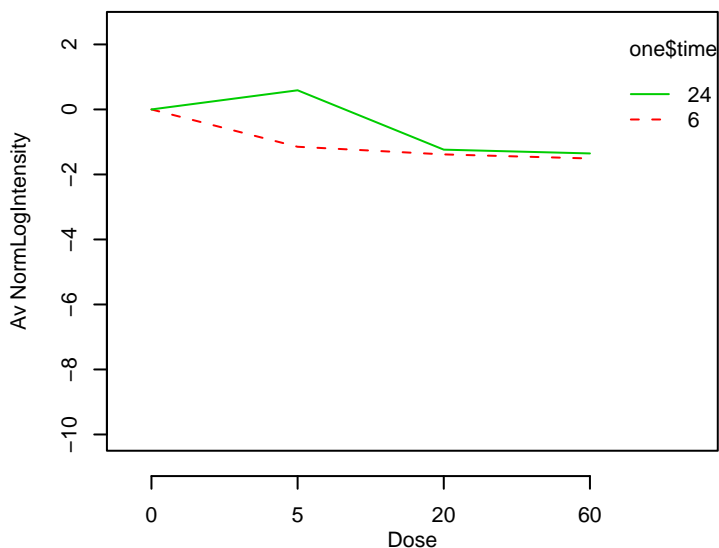

**GO\_0006206 : pyrimidine base metabolism**

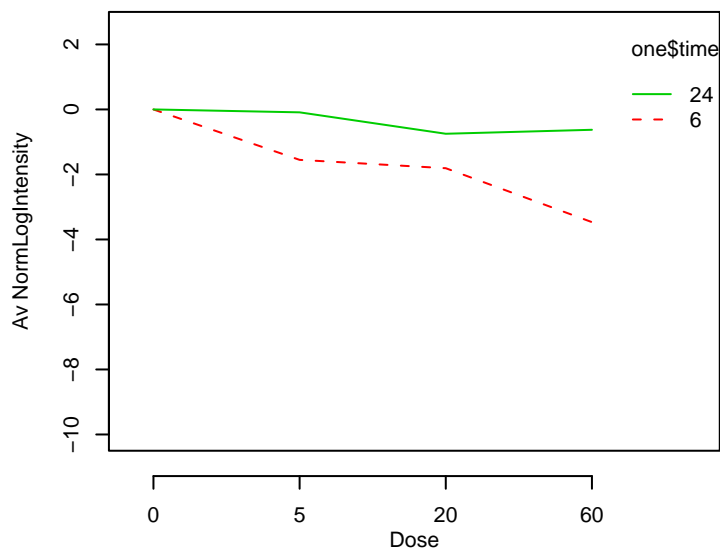

**GO\_0006207 : 'de novo' pyrimidine base biosynthesis**

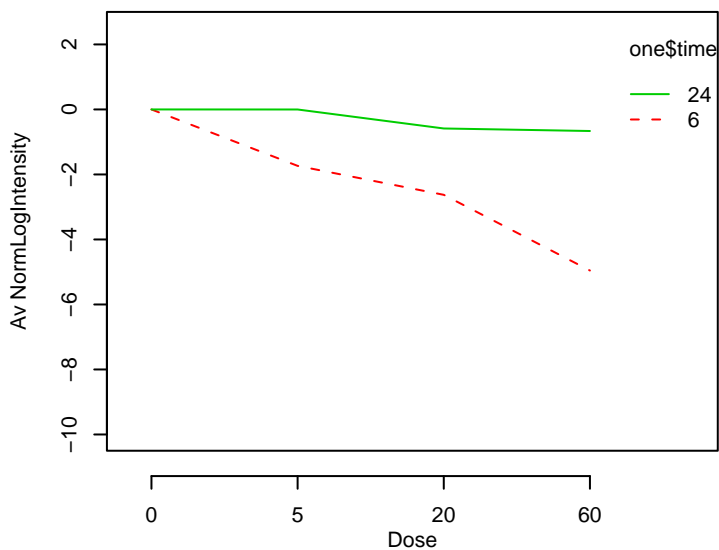

**GO\_0006213 : pyrimidine nucleoside metabolism**

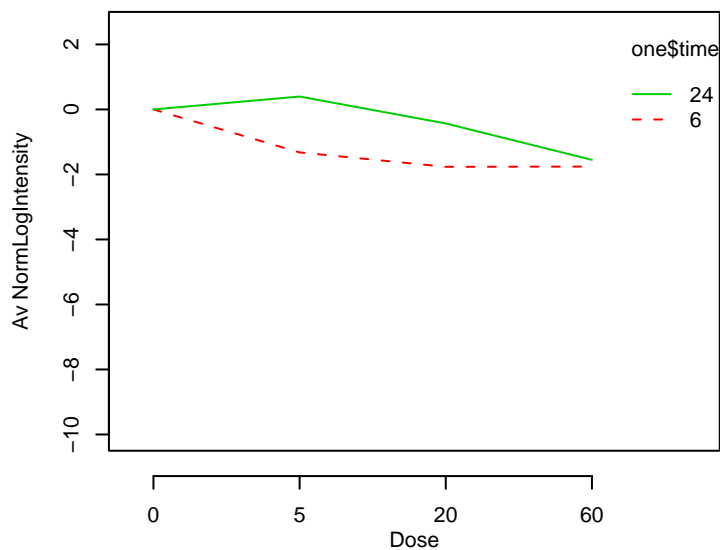

**GO\_0006220 : pyrimidine nucleotide metabolism**

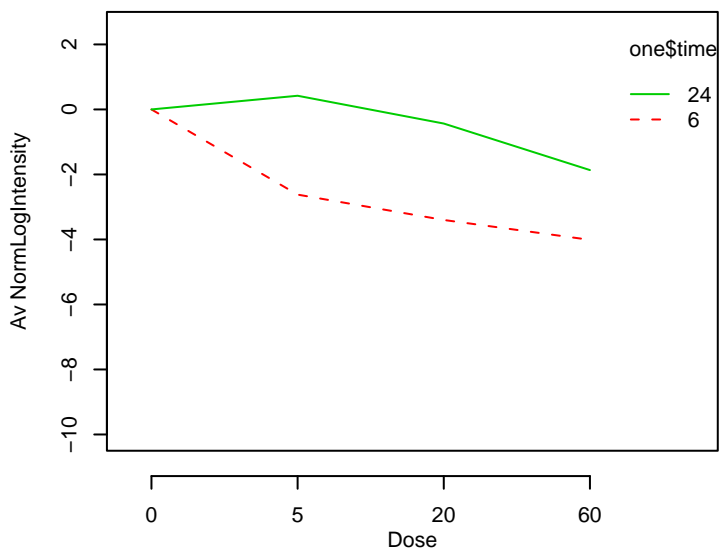

**GO\_0006221 : pyrimidine nucleotide biosynthesis**

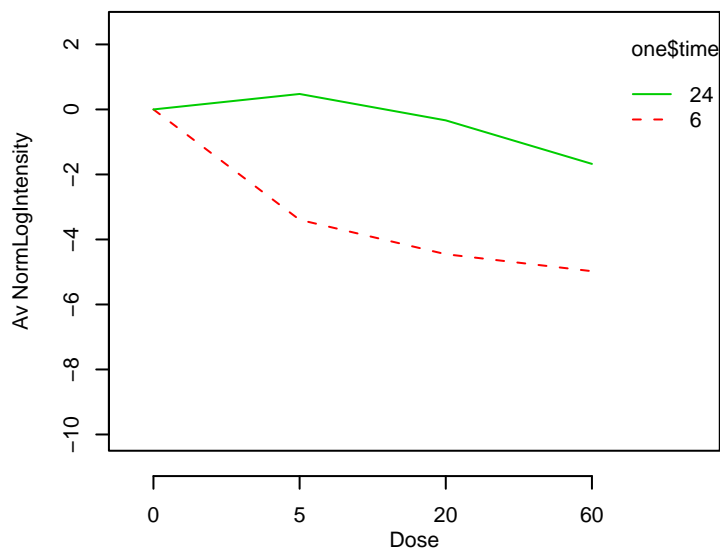

**GO\_0006228 : UTP biosynthesis**

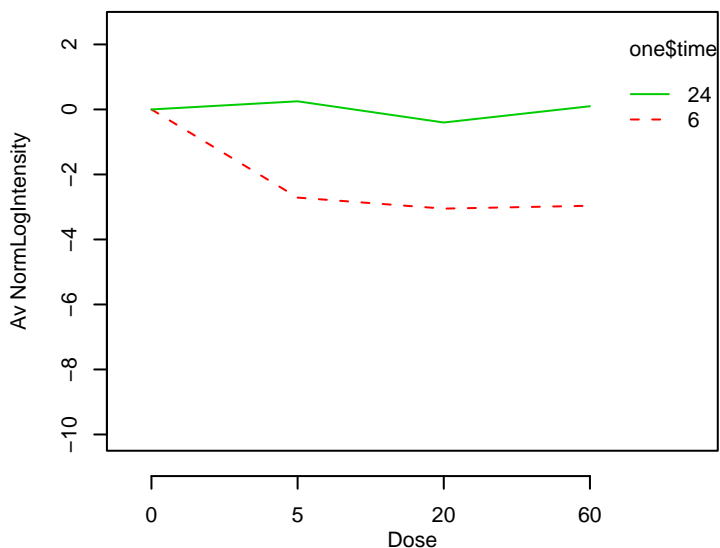

**GO\_0006241 : CTP biosynthesis**

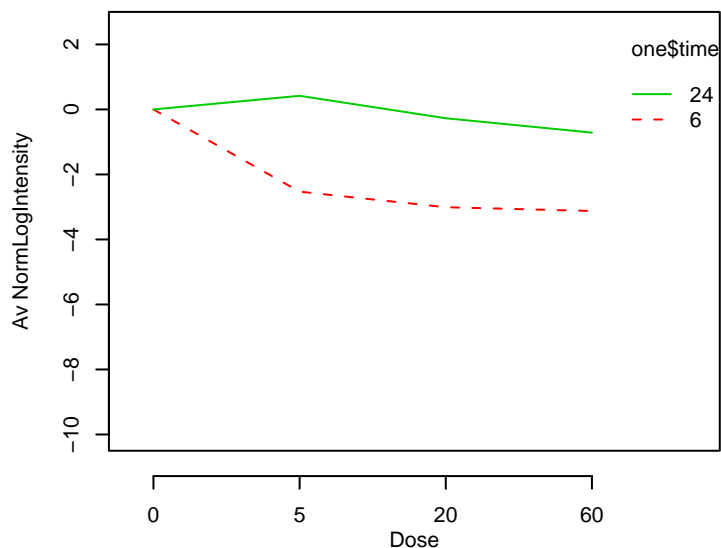

**GO\_0006260 : DNA replication**

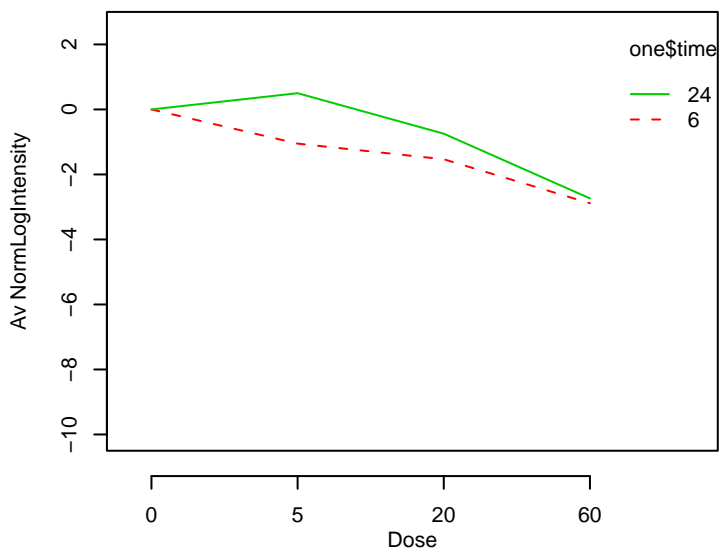

**GO\_0006261 : DNA-dependent DNA replication**

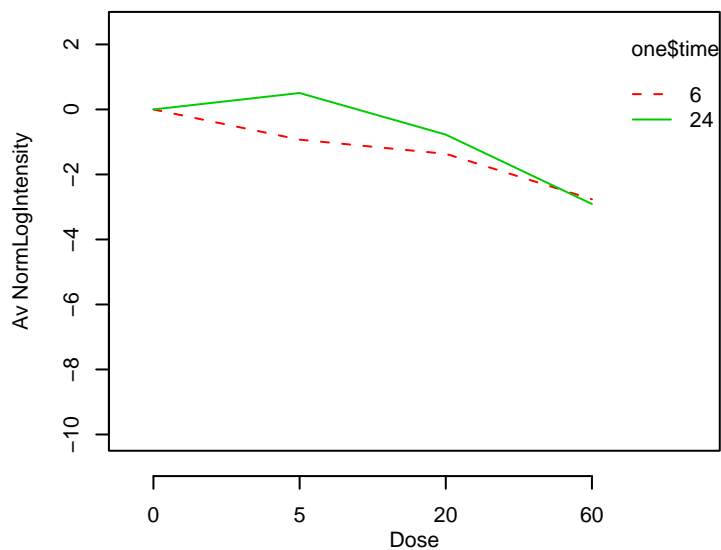

**GO\_0006265 : DNA topological change**

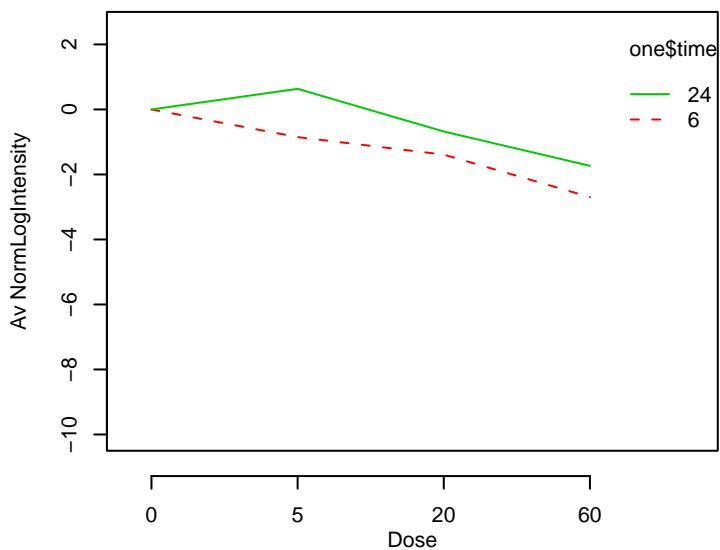

**GO\_0006268 : DNA unwinding during replication**

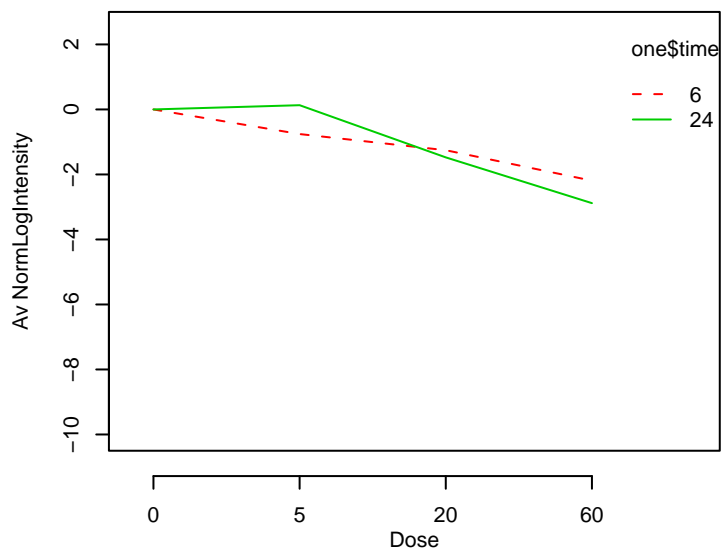

**GO\_0006270 : DNA replication initiation**

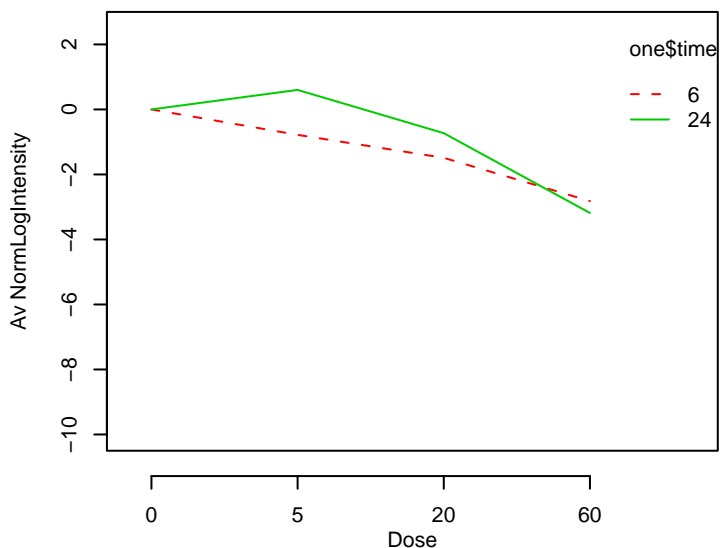

**GO\_0006271 : DNA strand elongation**

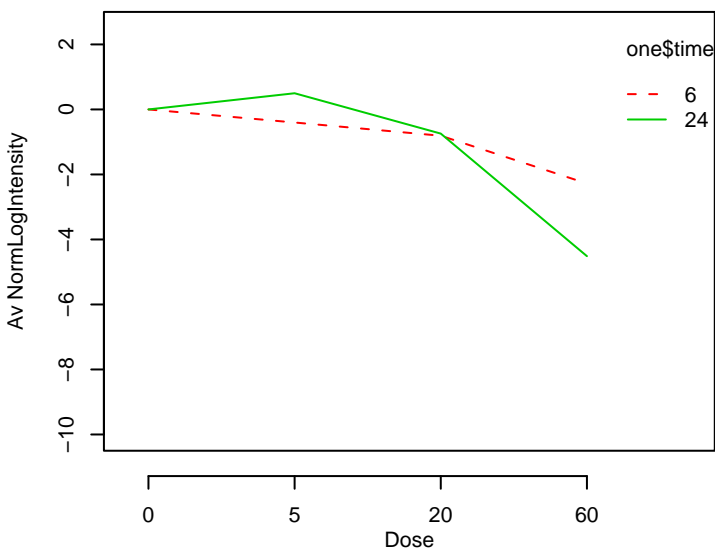

**GO\_0006275 : regulation of DNA replication**

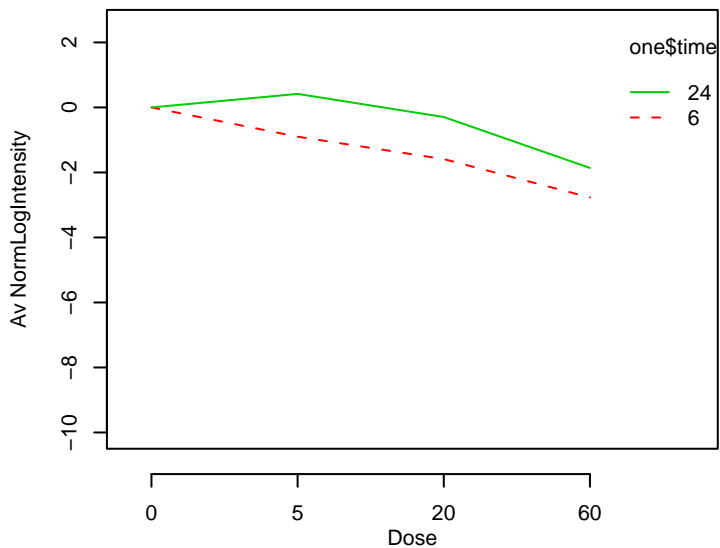

**GO\_0006281 : DNA repair**

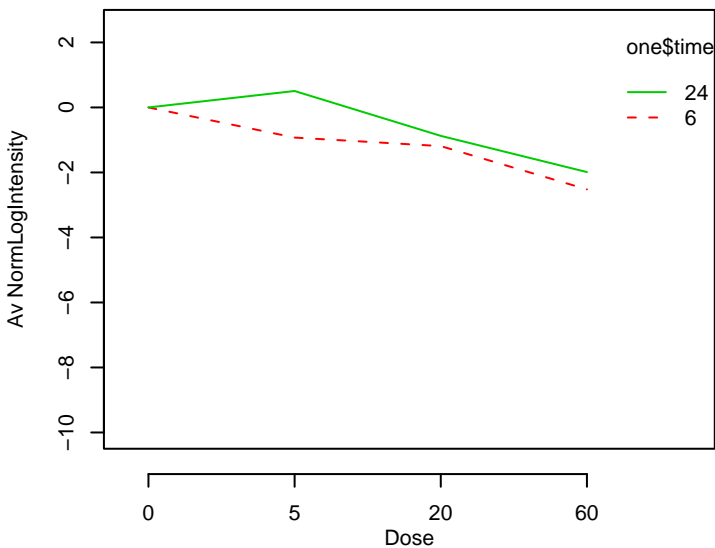

**GO\_0006282 : regulation of DNA repair**

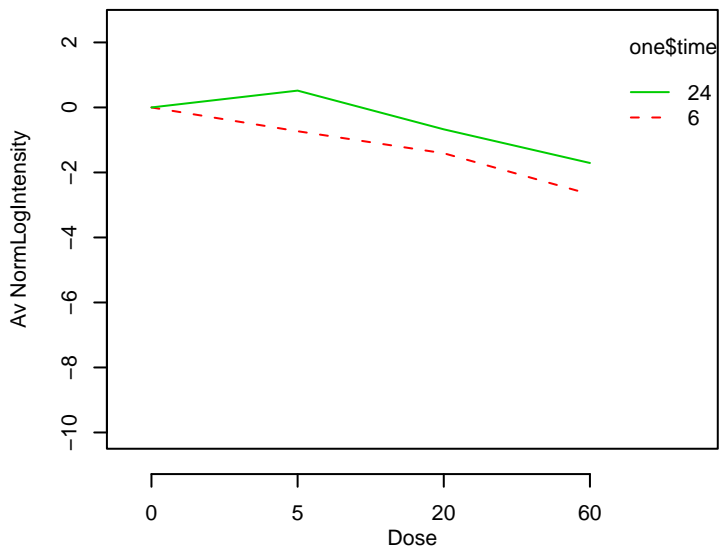

**GO\_0006283 : transcription-coupled nucleotide-excision re**

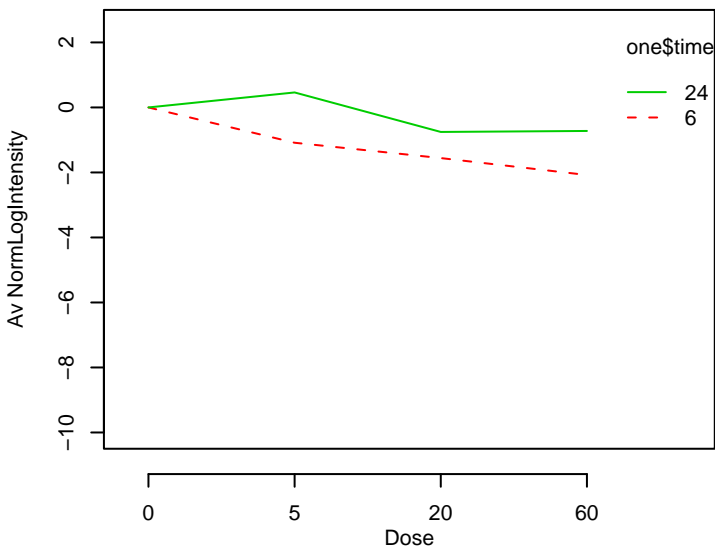

**GO\_0006284 : base-excision repair**

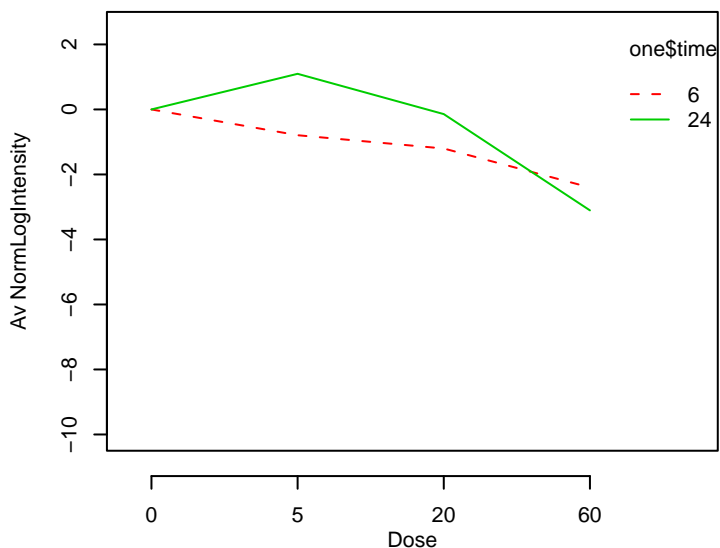

**GO\_0006289 : nucleotide-excision repair**

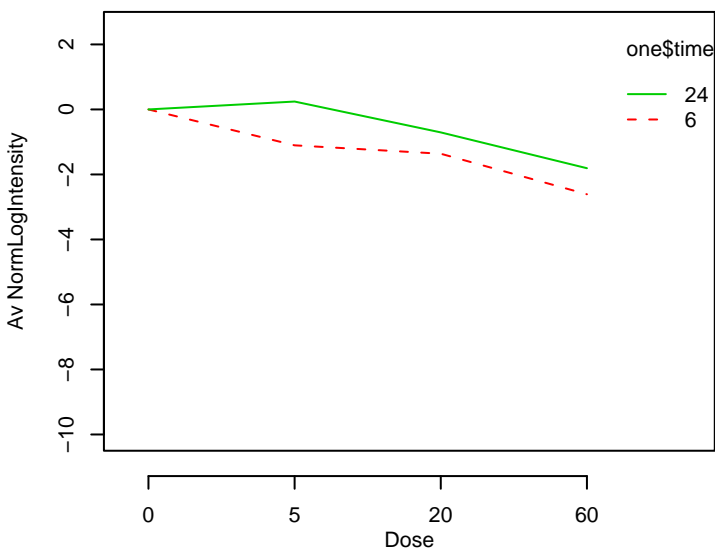

**GO\_0006298 : mismatch repair**

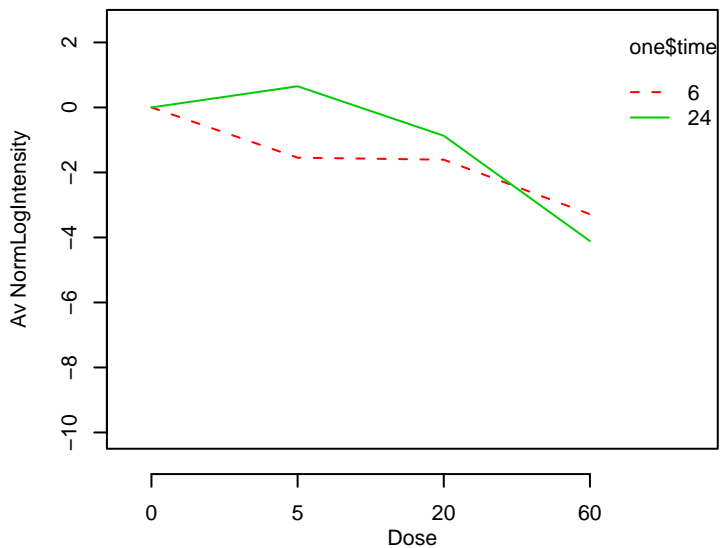

**GO\_0006301 : postreplication repair**

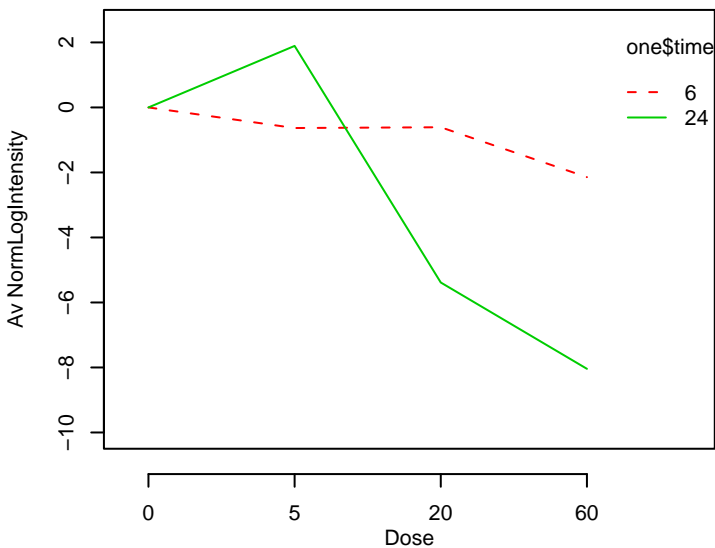

**GO\_0006302 : double-strand break repair**

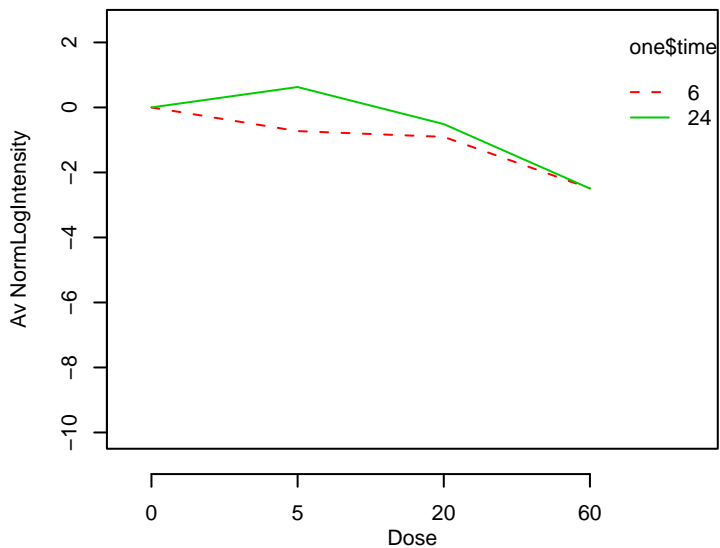

**O\_0006303 : double-strand break repair via nonhomologous**

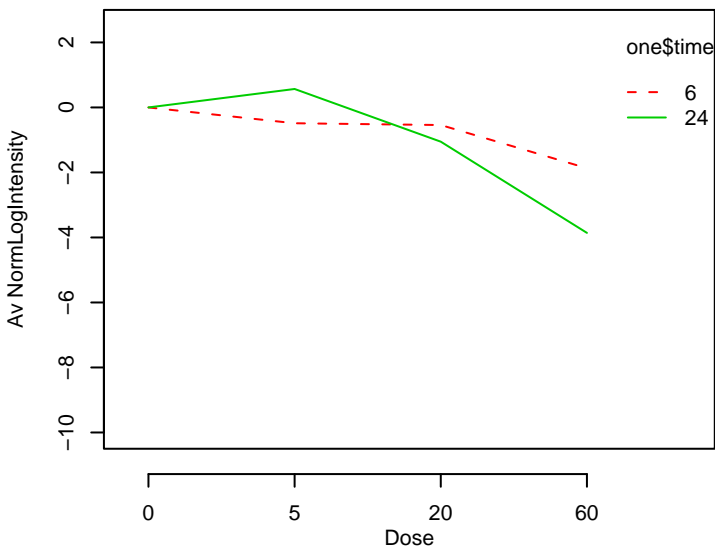

**GO\_0006304 : DNA modification**

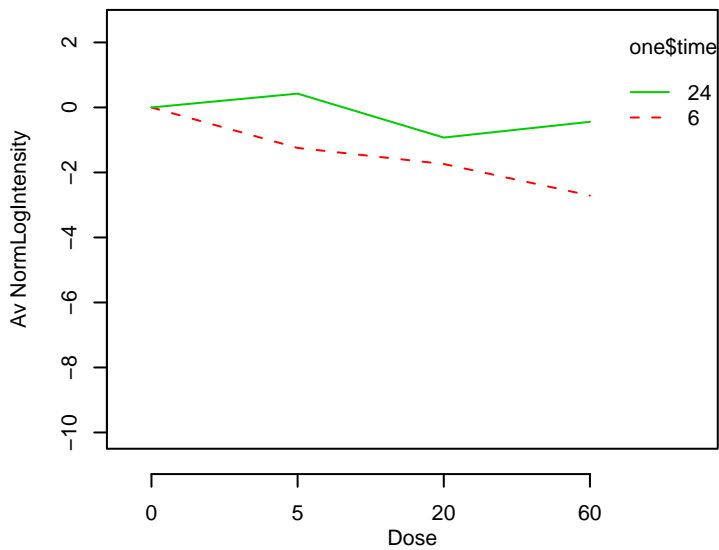

**GO\_0006305 : DNA alkylation**

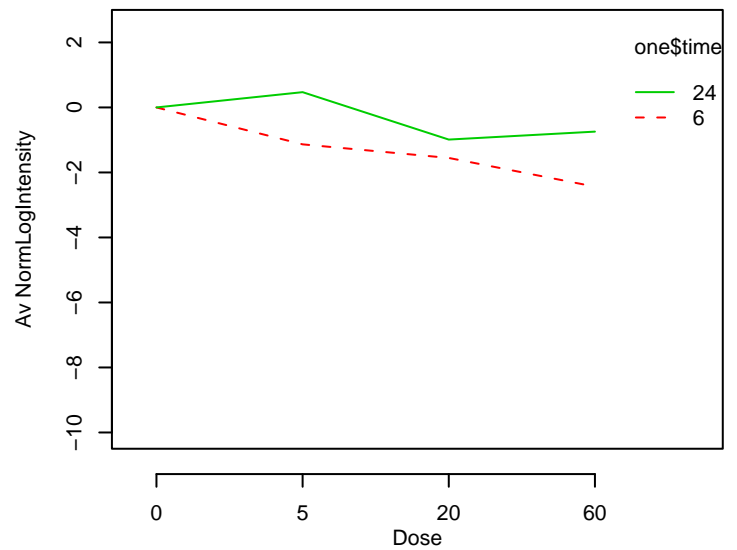

**GO\_0006306 : DNA methylation**

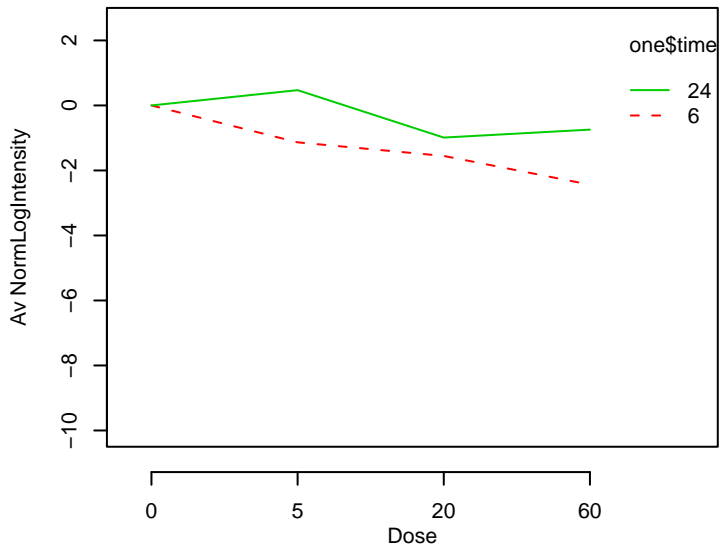

**GO\_0006308 : DNA catabolism**

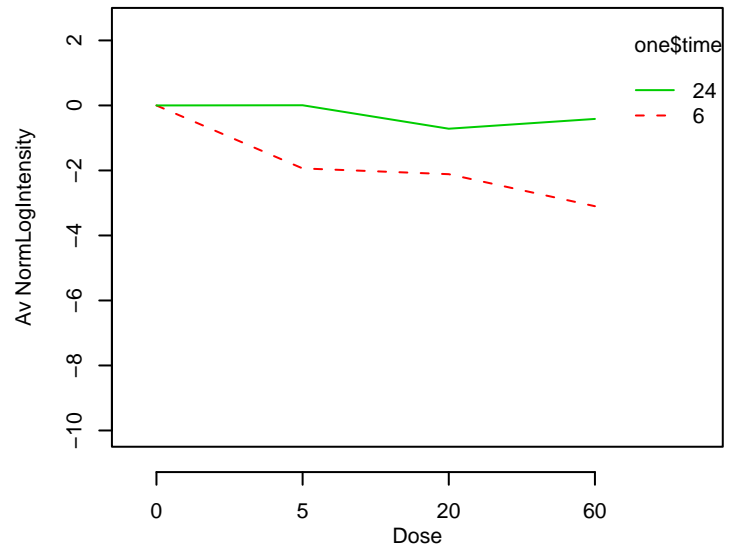

**GO\_0006309 : DNA fragmentation during apoptosis**

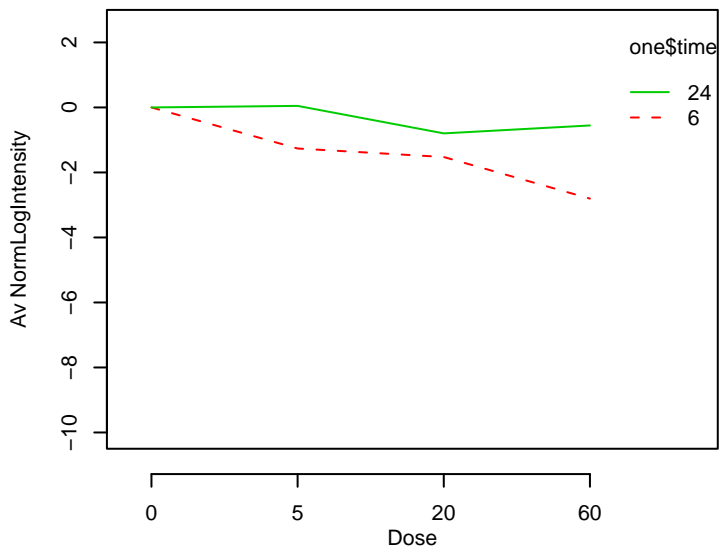

**GO\_0006310 : DNA recombination**

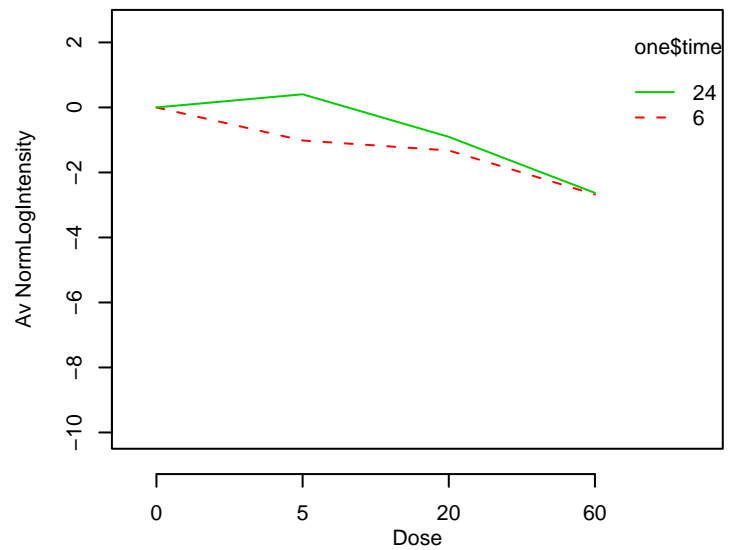

**GO\_0006312 : mitotic recombination**

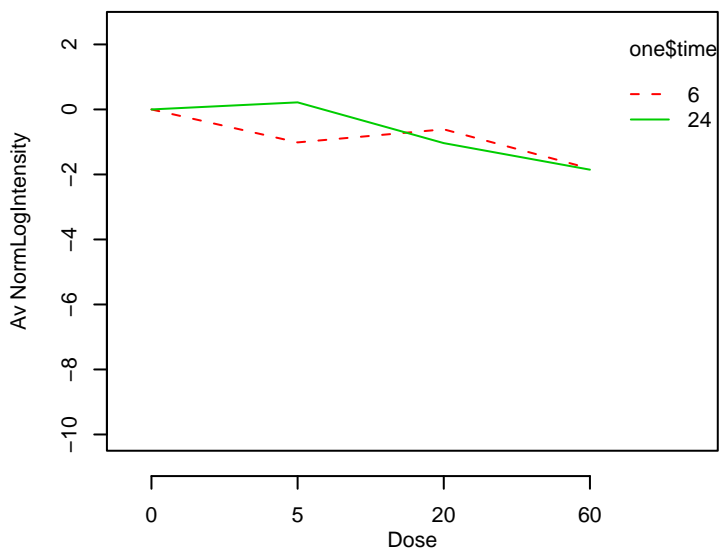

**GO\_0006333 : chromatin assembly or disassembly**

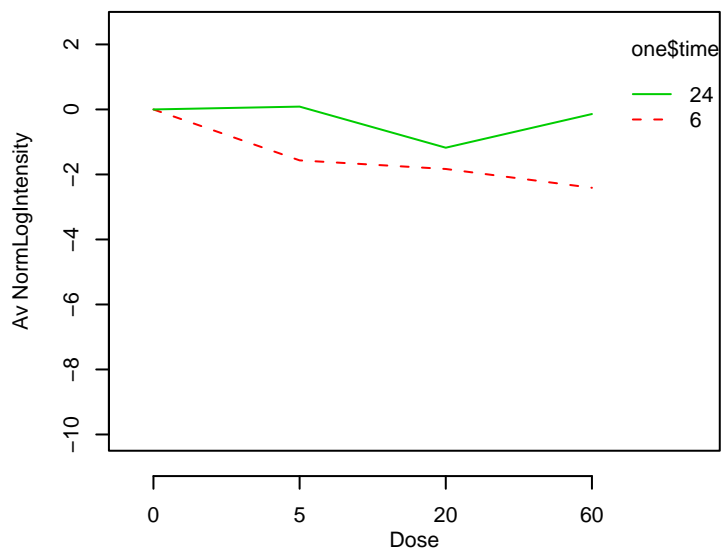

**GO\_0006334 : nucleosome assembly**

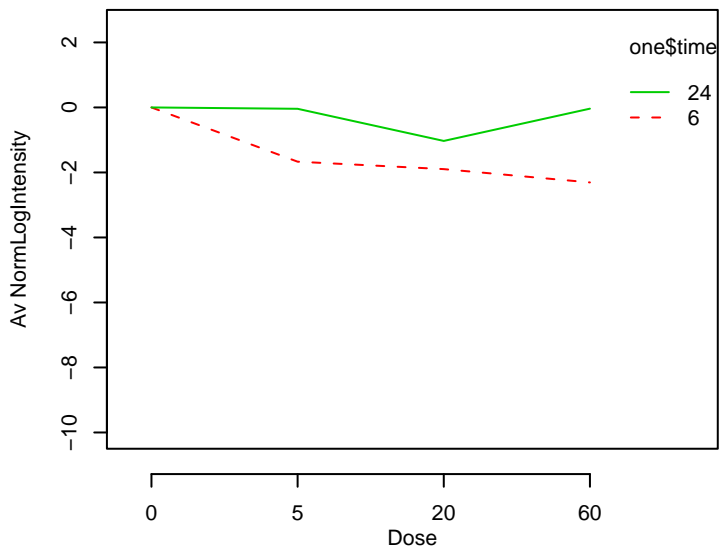

**GO\_0006337 : nucleosome disassembly**

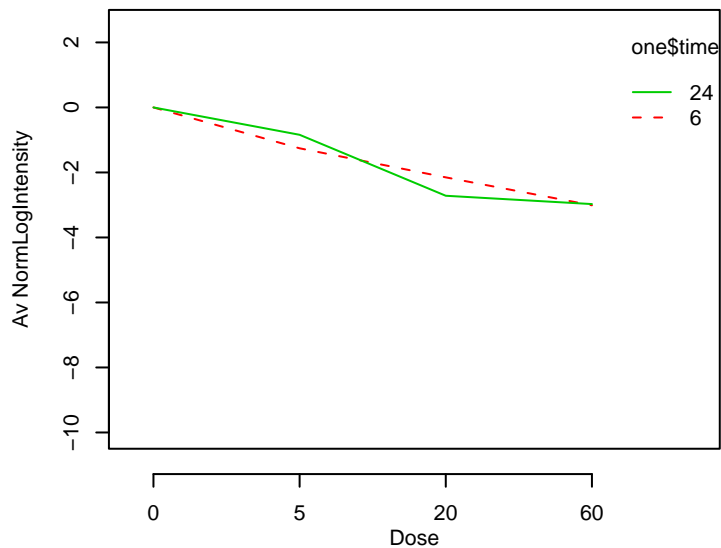

**GO\_0006338 : chromatin remodeling**

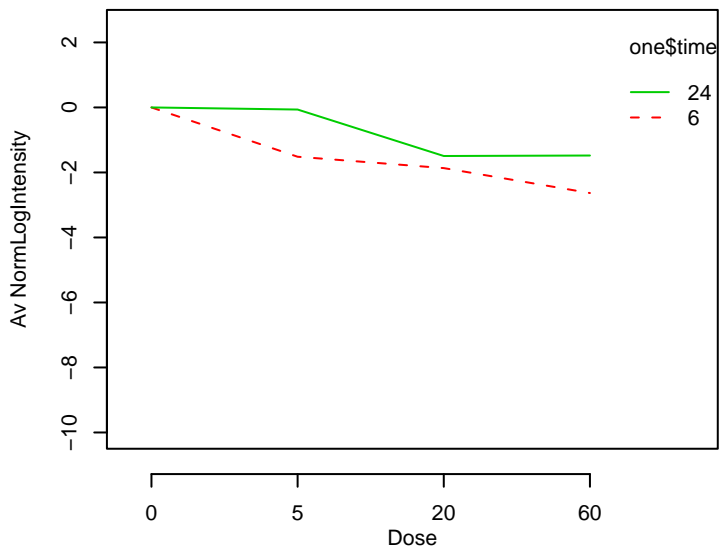

**GO\_0006342 : chromatin silencing**

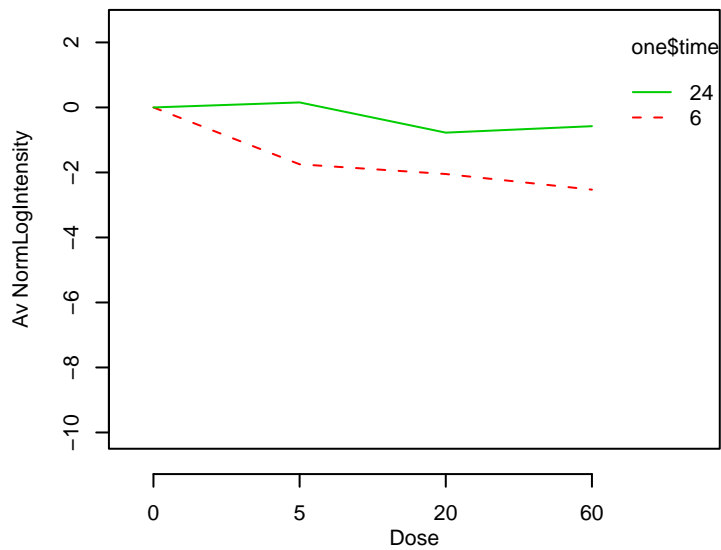

**GO\_0006349 : imprinting**

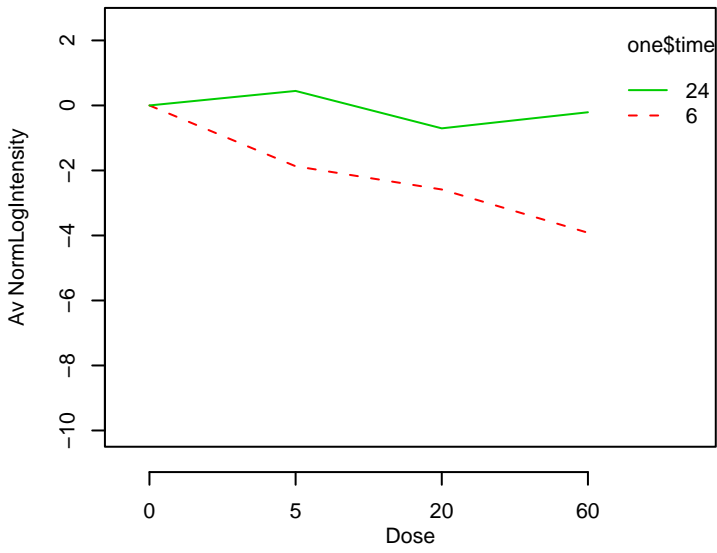

**GO\_0006352 : transcription initiation**

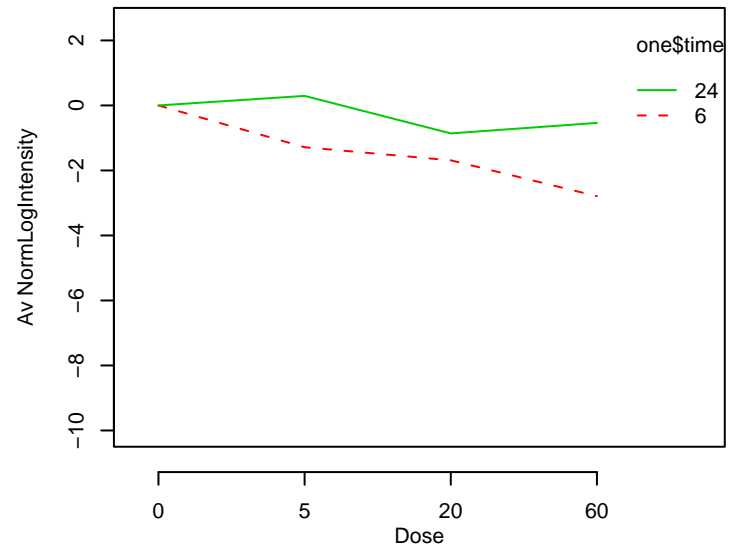

**GO\_0006353 : transcription termination**

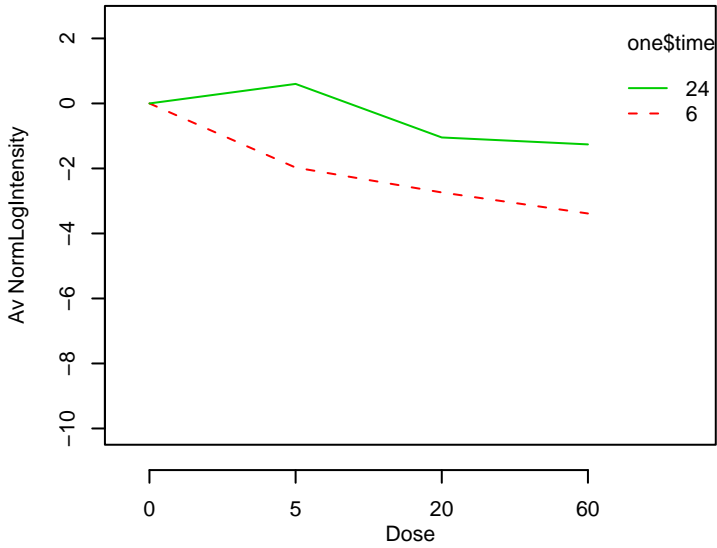

**GO\_0006354 : RNA elongation**

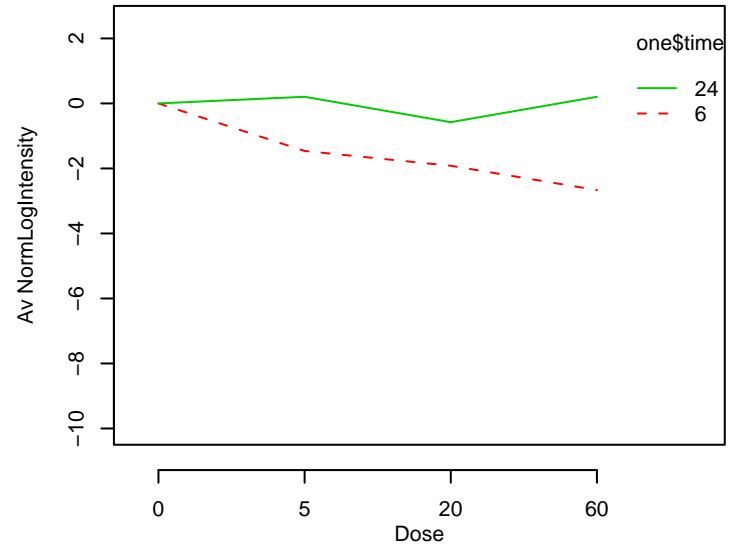

**GO\_0006359 : regulation of transcription from RNA polymerase II promoter**    **GO\_0006360 : transcription from RNA polymerase I promoter**

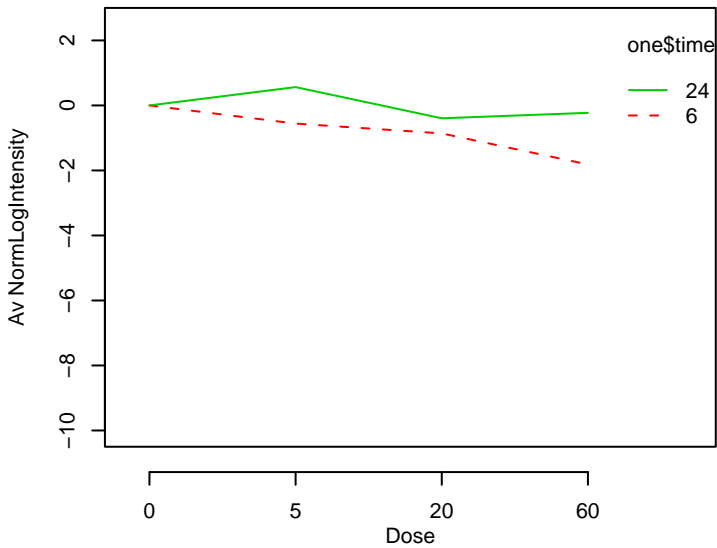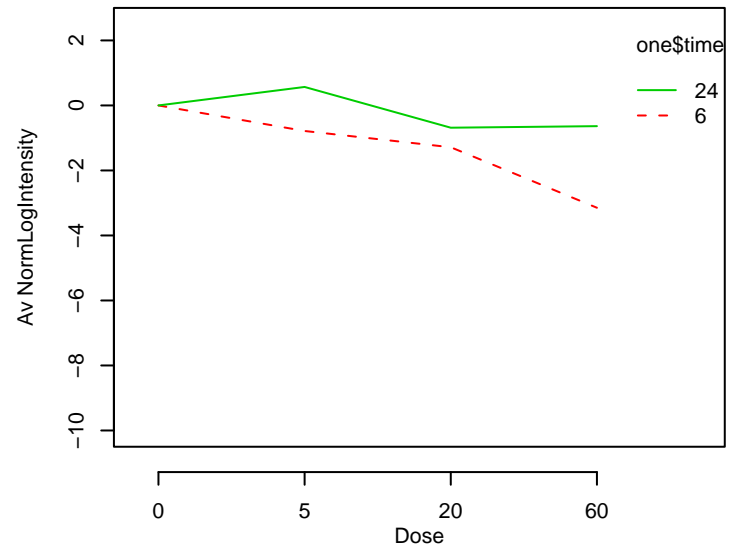

**GO\_0006364 : rRNA processing**

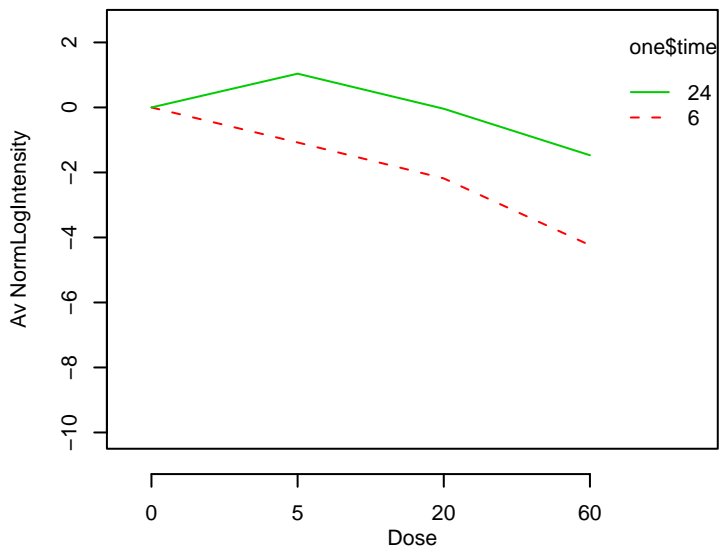

**GO\_0006365 : 35S primary transcript processing**

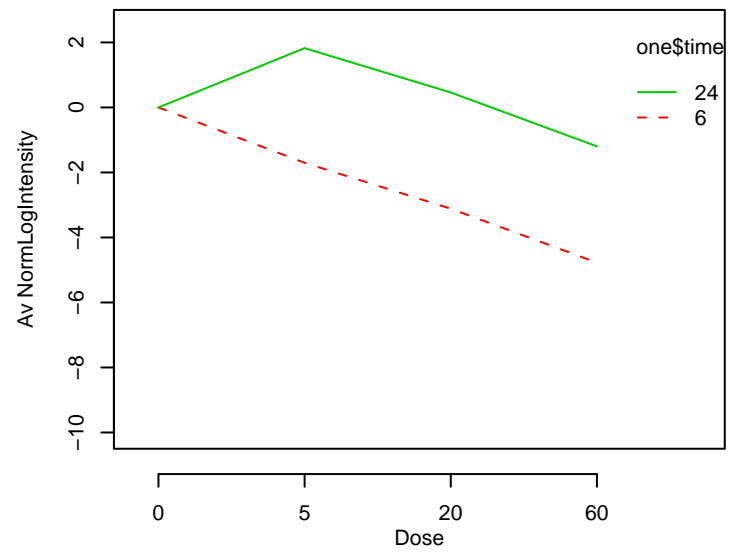

**GO\_0006367 : transcription initiation from RNA polymerase** **GO\_0006368 : RNA elongation from RNA polymerase II prom**

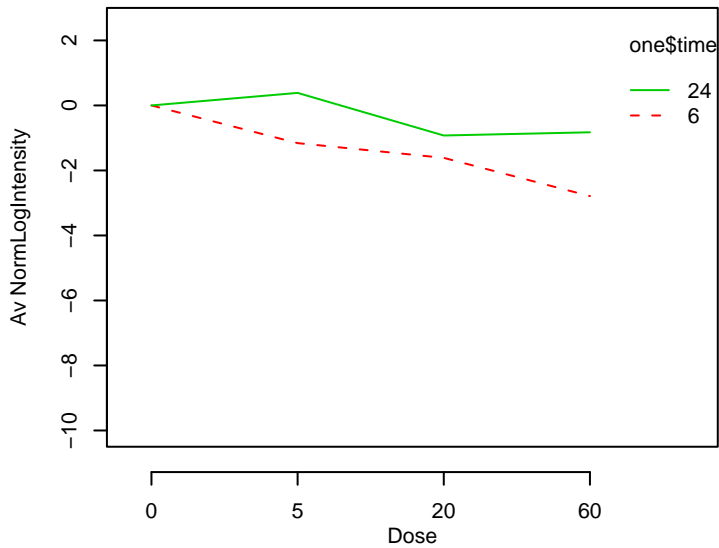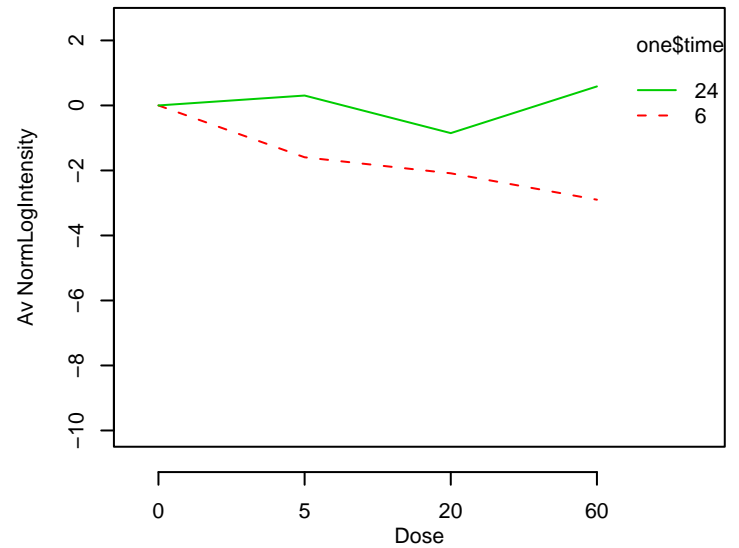

**GO\_0006376 : mRNA splice site selection**

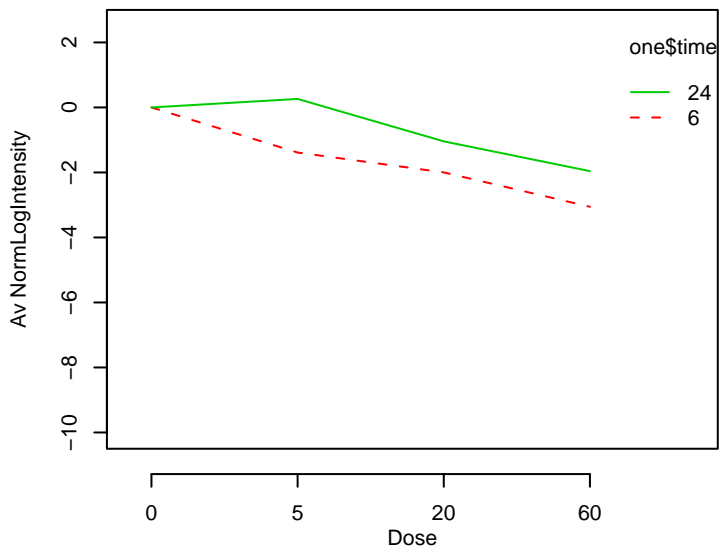

**GO\_0006378 : mRNA polyadenylation**

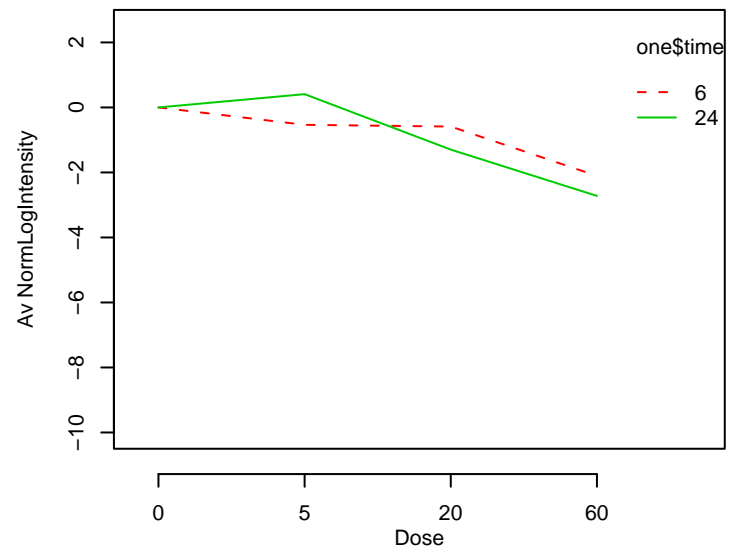



**GO\_0006379 : mRNA cleavage**

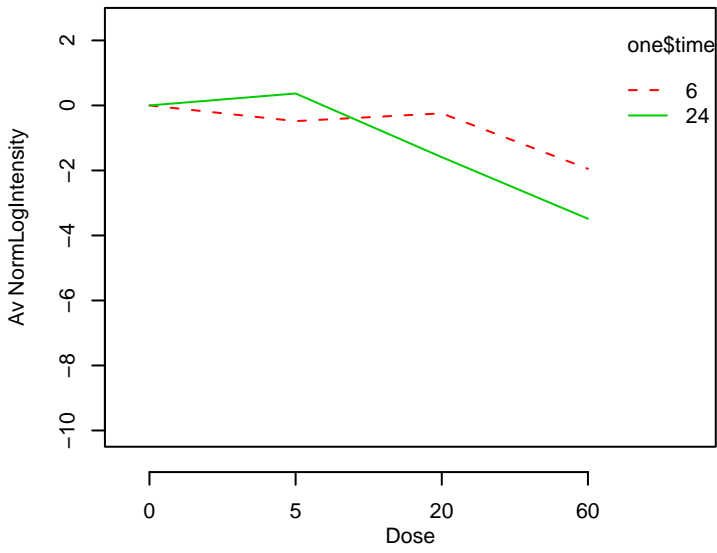

**GO\_0006381 : mRNA editing**

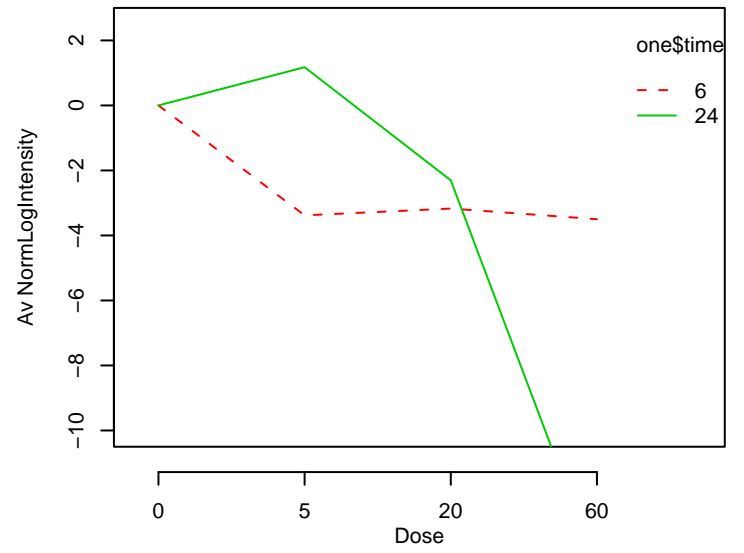

**GO\_0006383 : transcription from RNA polymerase III promo**

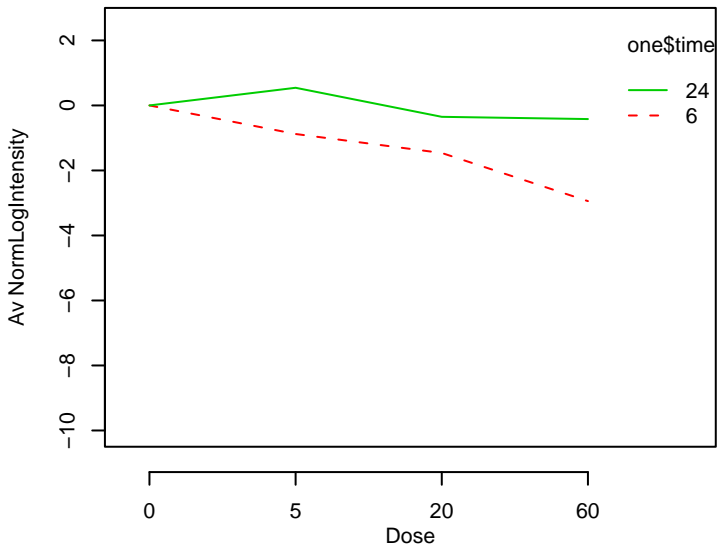

**GO\_0006397 : mRNA processing**

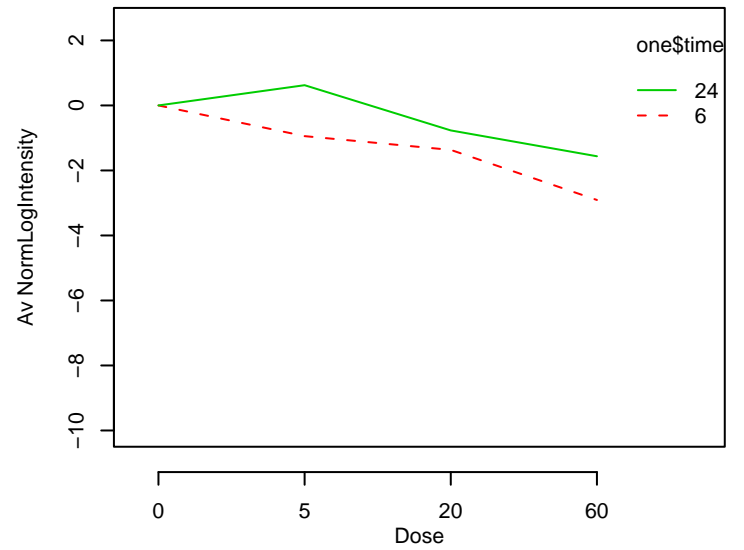

**GO\_0006399 : tRNA metabolism**

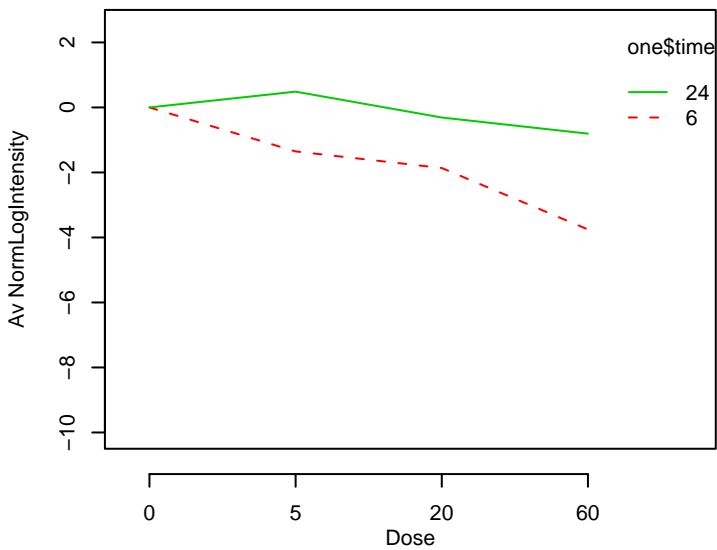

**GO\_0006400 : tRNA modification**

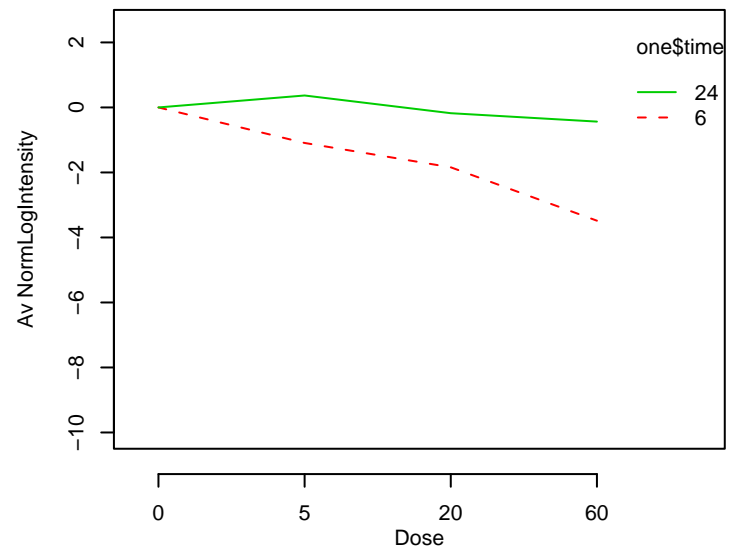

**GO\_0006401 : RNA catabolism**

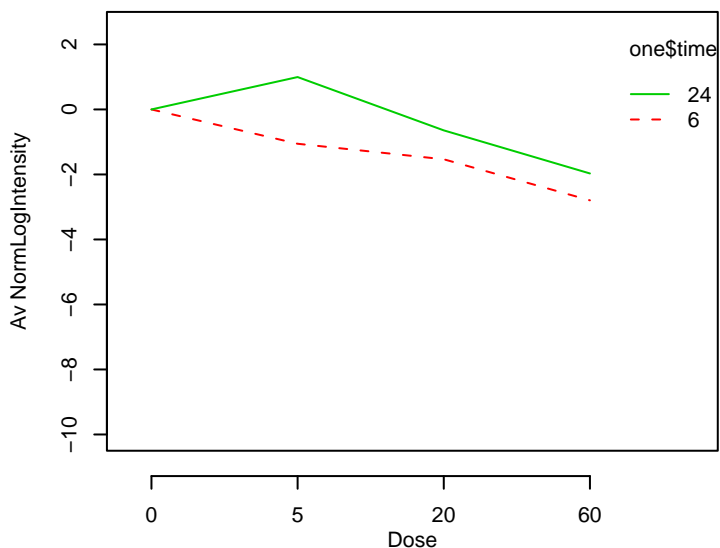

**GO\_0006402 : mRNA catabolism**

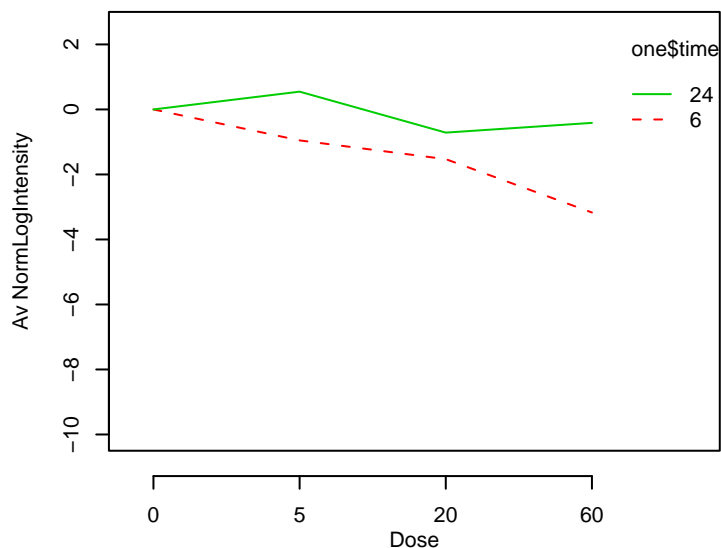

**GO\_0006403 : RNA localization**

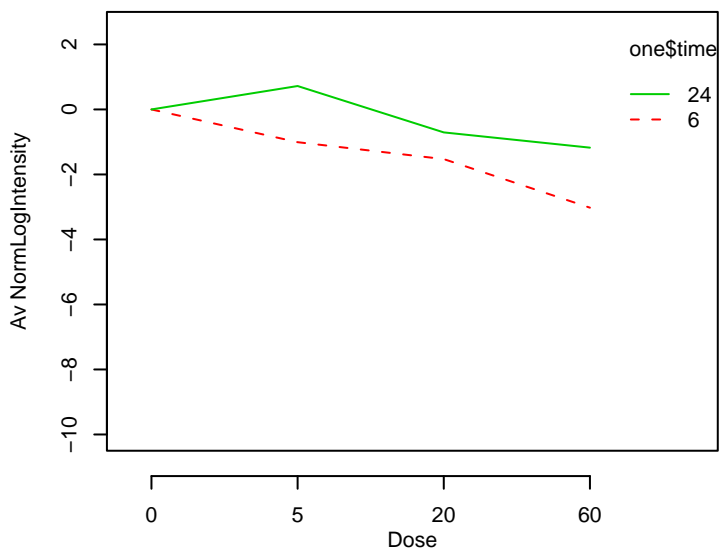

**GO\_0006405 : RNA export from nucleus**

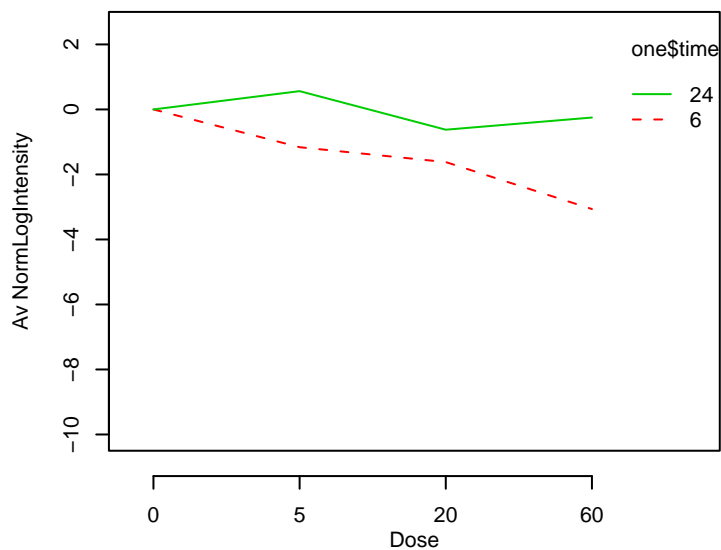

**GO\_0006406 : mRNA export from nucleus**

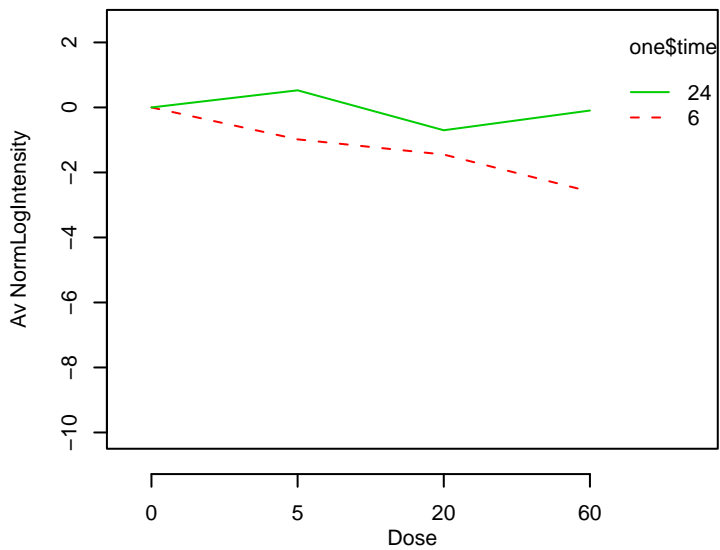

**GO\_0006413 : translational initiation**

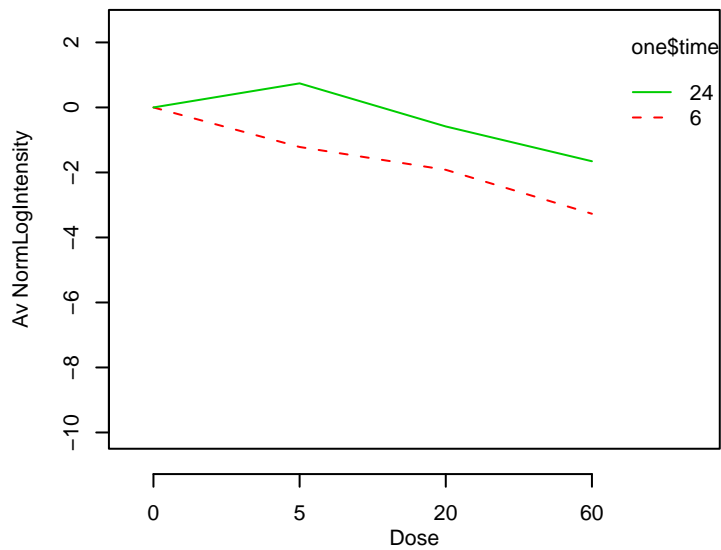

**GO\_0006414 : translational elongation**

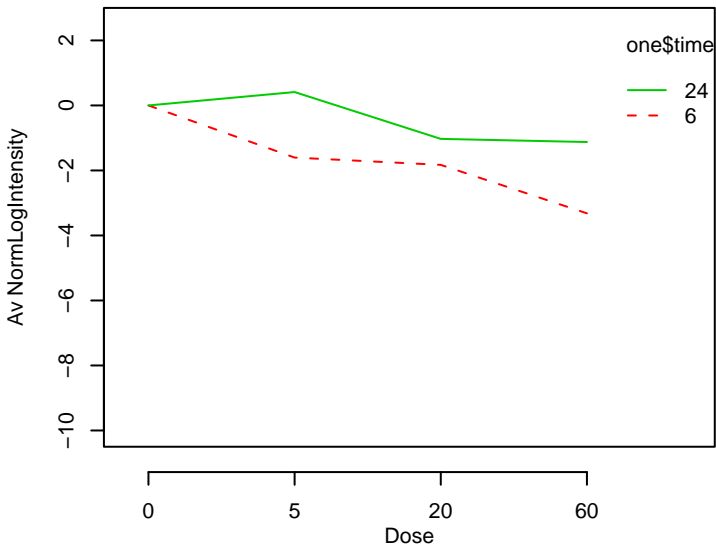

**GO\_0006415 : translational termination**

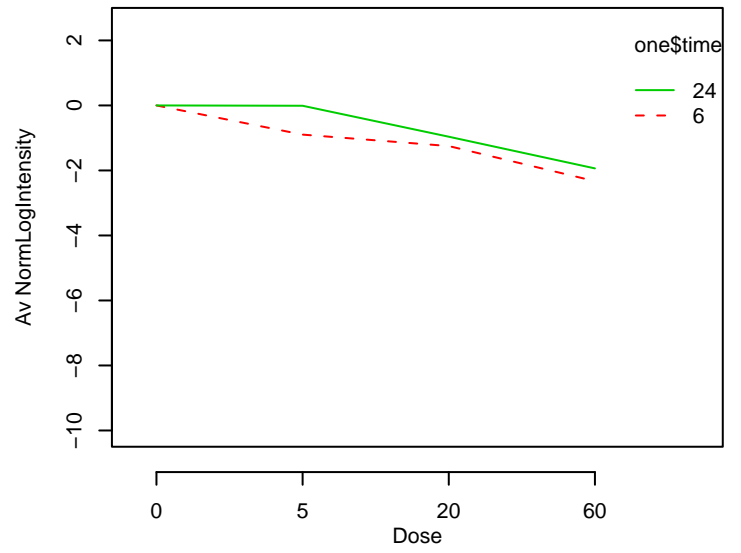

**GO\_0006417 : regulation of protein biosynthesis**

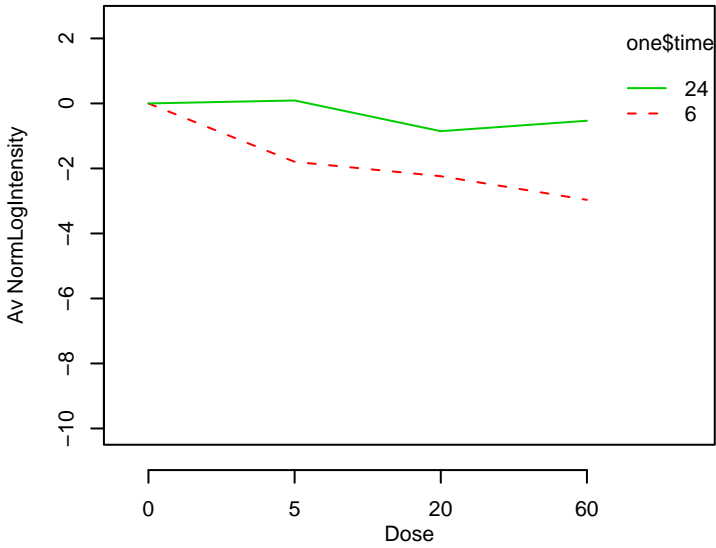

**GO\_0006418 : tRNA aminoacylation for protein translation**

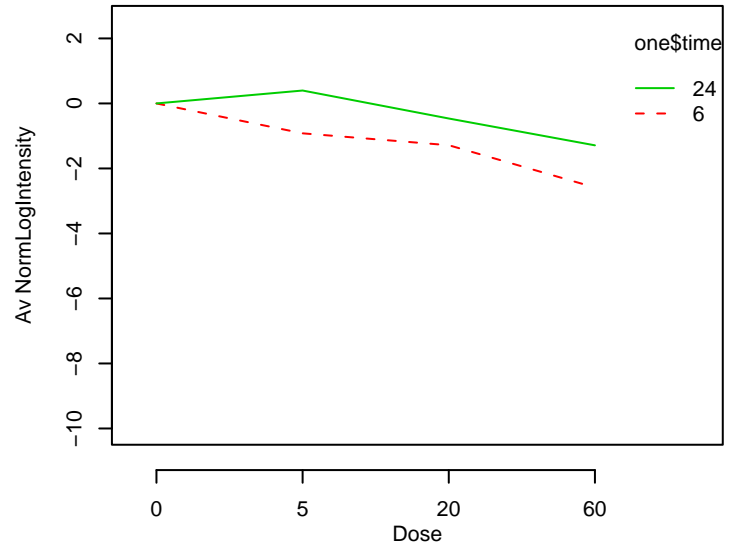

**GO\_0006445 : regulation of translation**

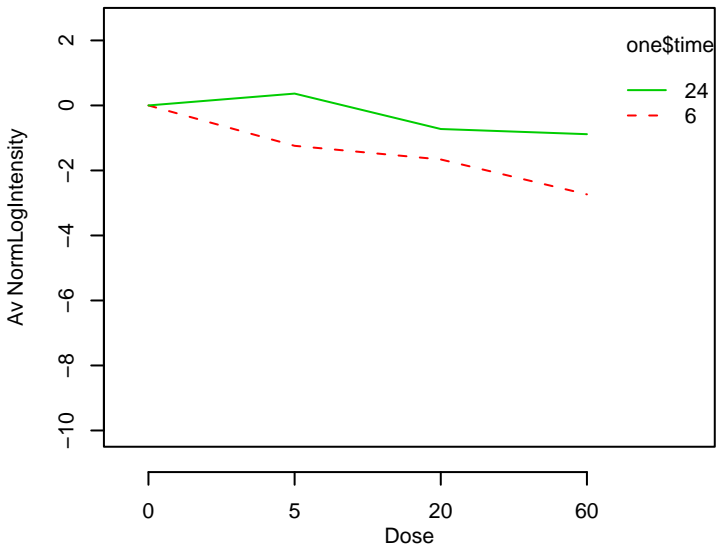

**GO\_0006446 : regulation of translational initiation**

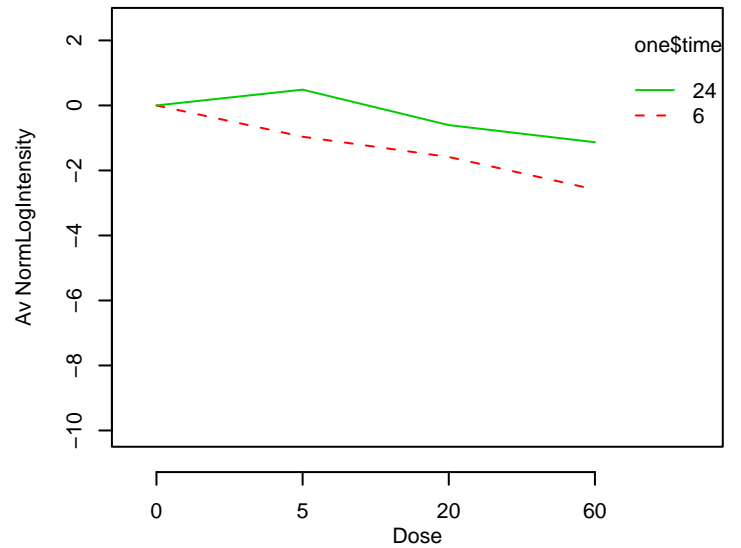

**GO\_0006451 : translational readthrough**

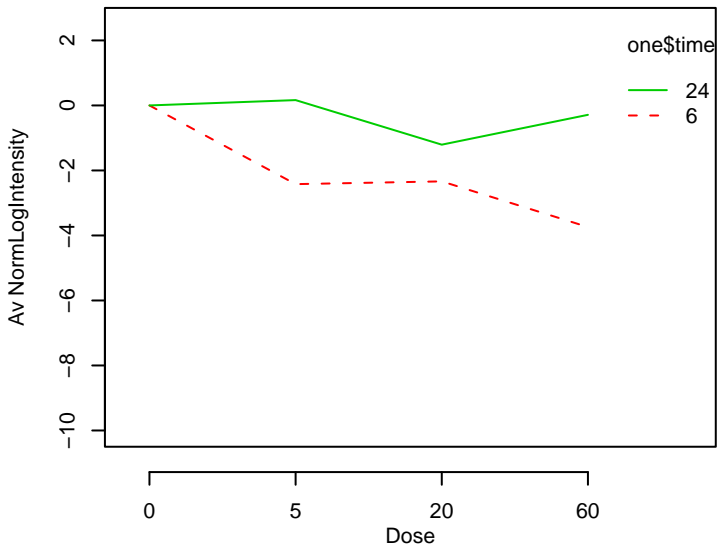

**GO\_0006457 : protein folding**

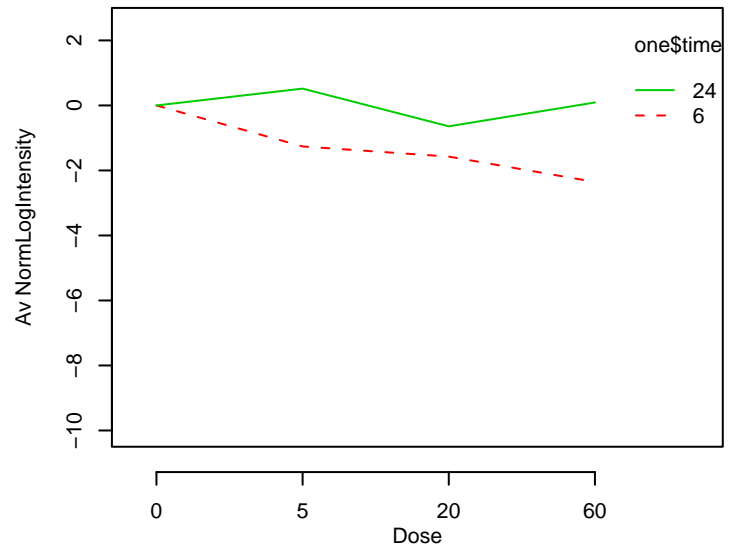

**GO\_0006465 : signal peptide processing**

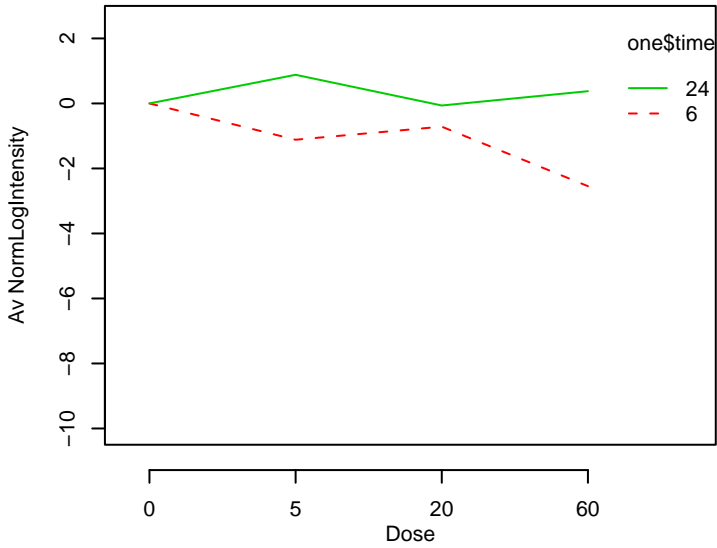

**GO\_0006469 : negative regulation of protein kinase activit**

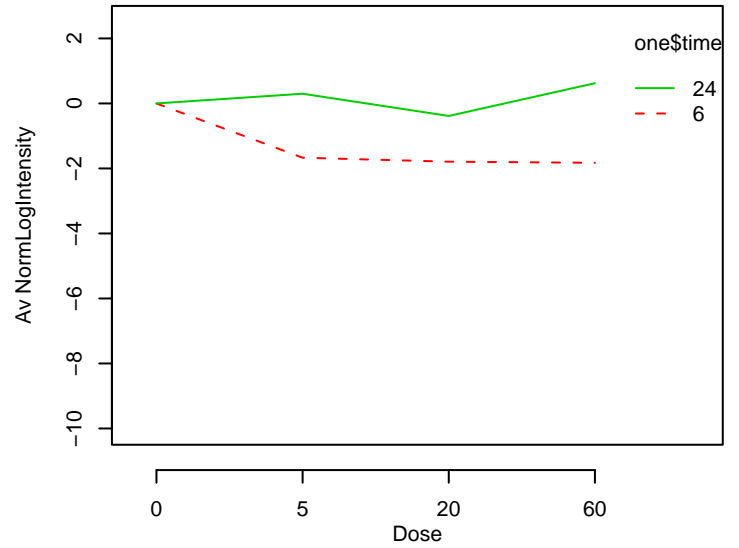

**GO\_0006470 : protein amino acid dephosphorylation**

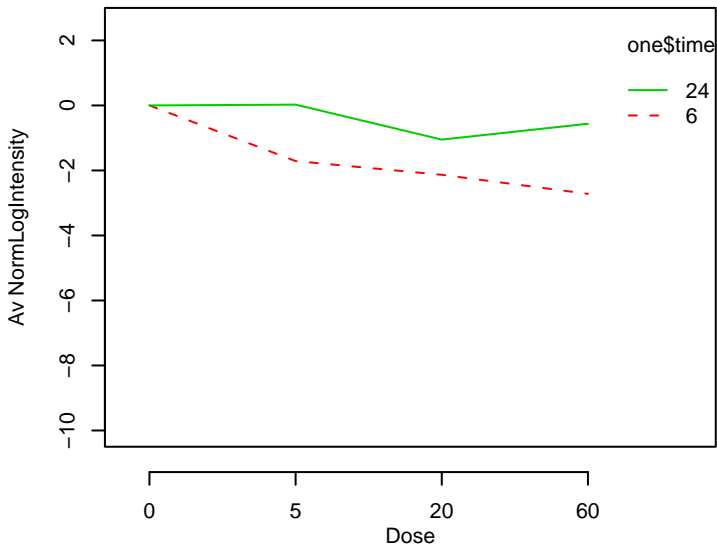

**GO\_0006471 : protein amino acid ADP-ribosylation**

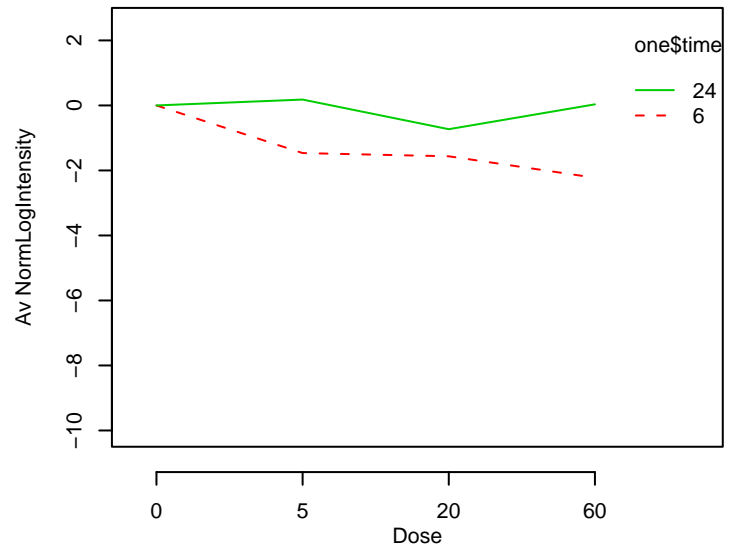

**GO\_0006473 : protein amino acid acetylation**

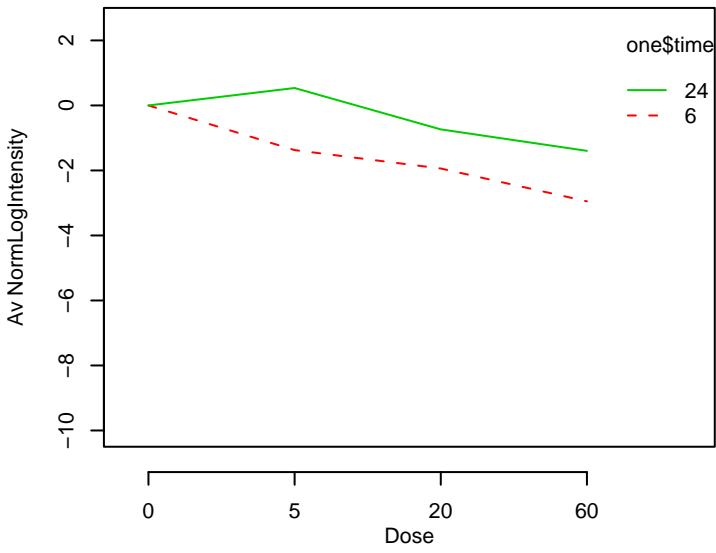

**GO\_0006476 : protein amino acid deacetylation**

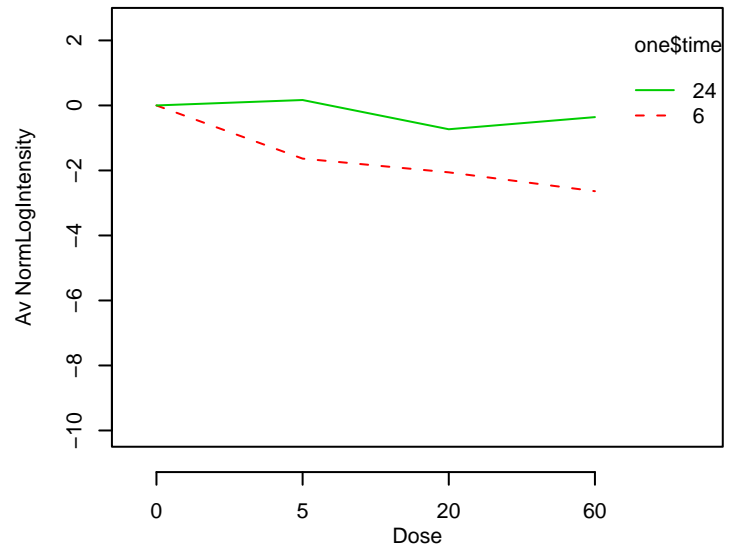

**GO\_0006477 : protein amino acid sulfation**

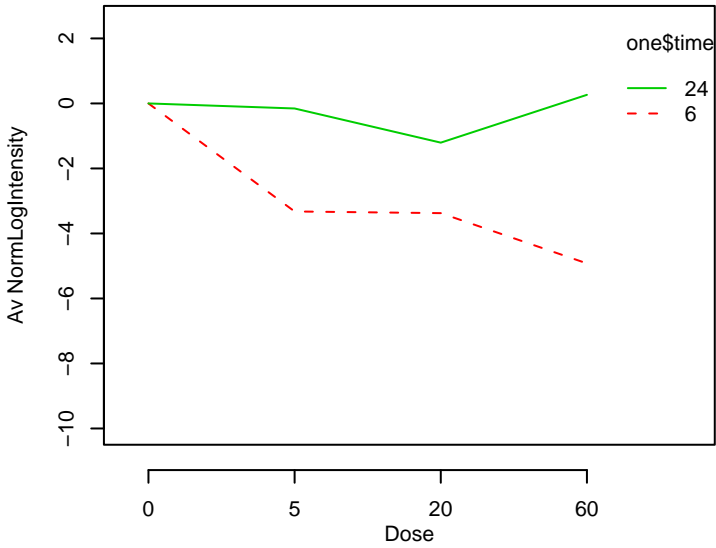

**GO\_0006479 : protein amino acid methylation**

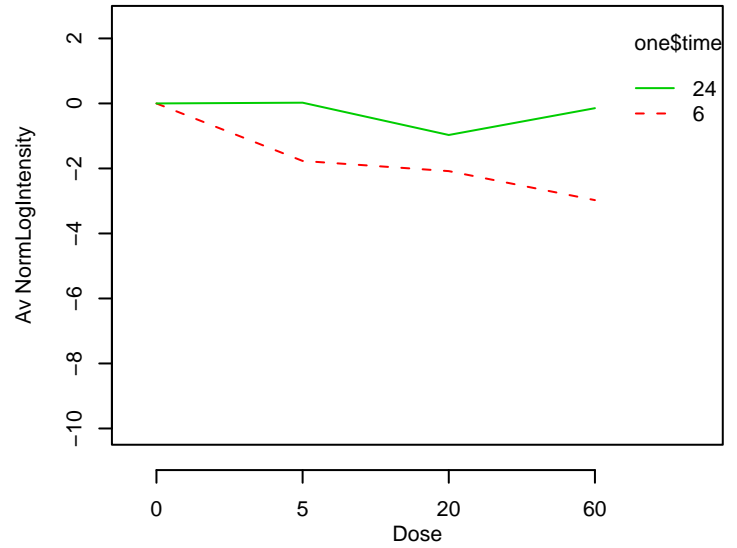

**GO\_0006486 : protein amino acid glycosylation**

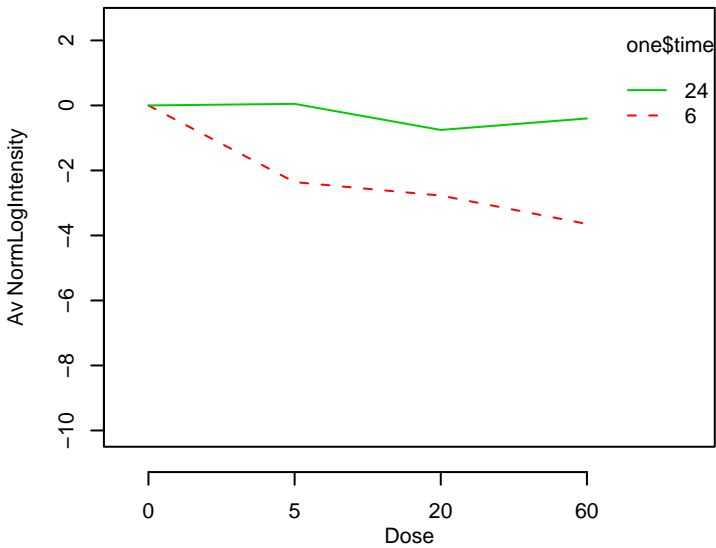

**GO\_0006487 : protein amino acid N-linked glycosylation**

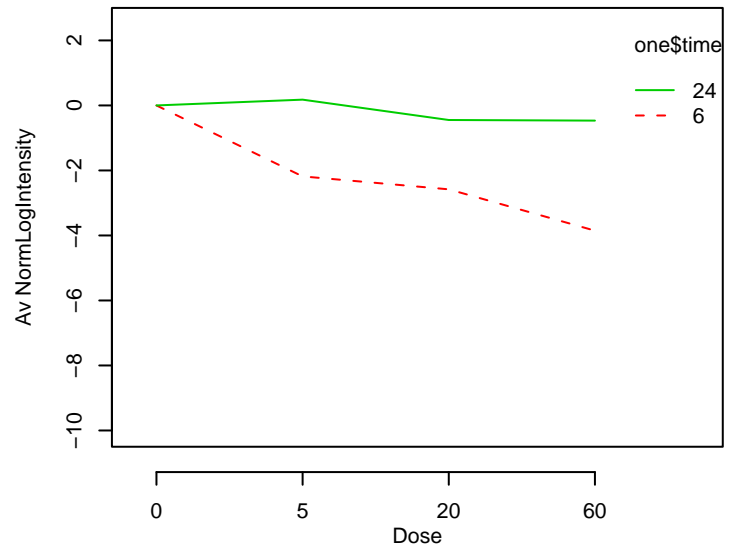

**GO\_0006491 : N-glycan processing**

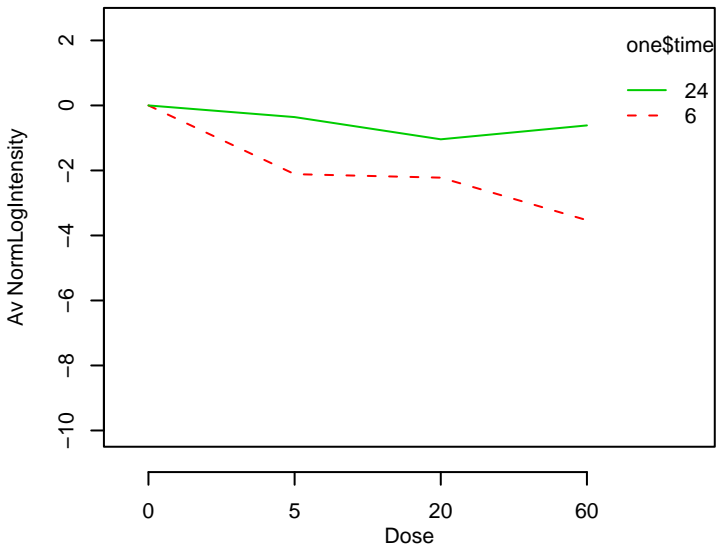

**GO\_0006493 : protein amino acid O-linked glycosylation**

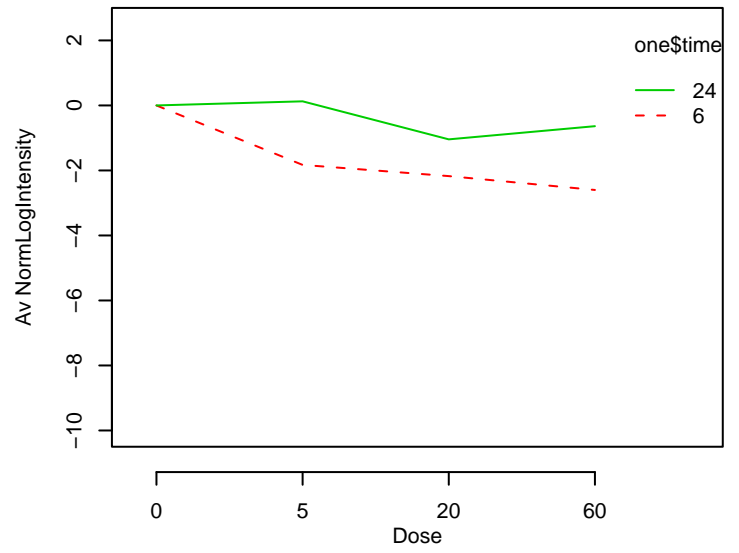

**GO\_0006497 : protein amino acid lipidation**

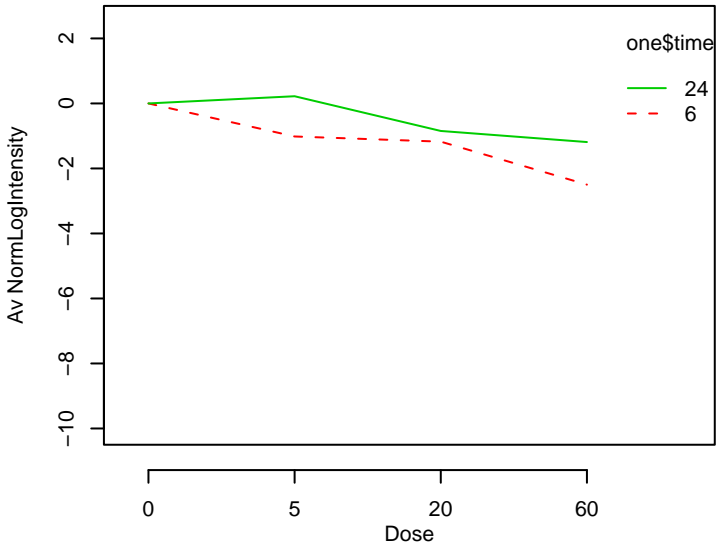

**GO\_0006505 : GPI anchor metabolism**

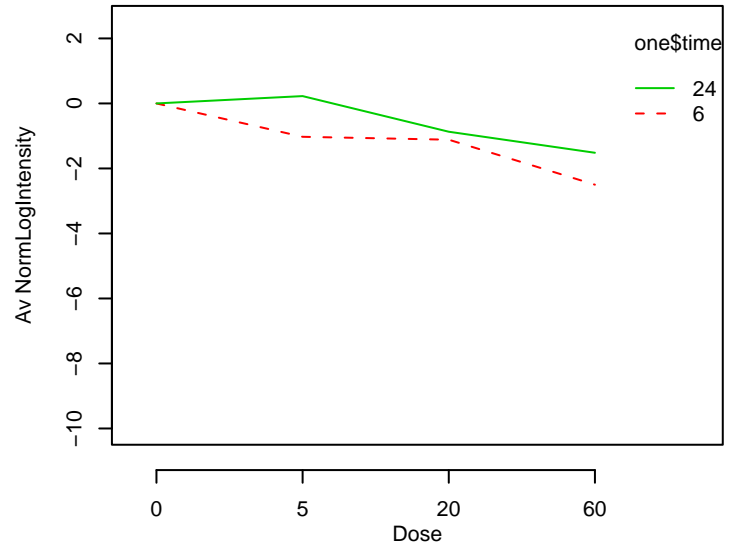

**GO\_0006506 : GPI anchor biosynthesis**

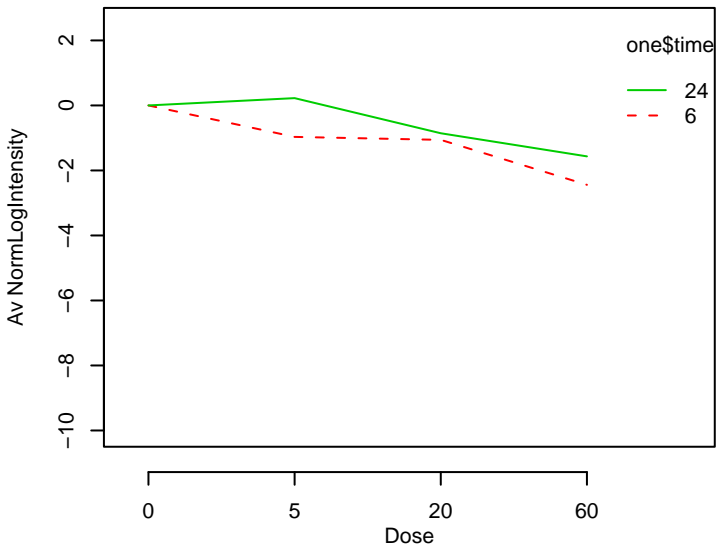

**GO\_0006509 : membrane protein ectodomain proteolysis**

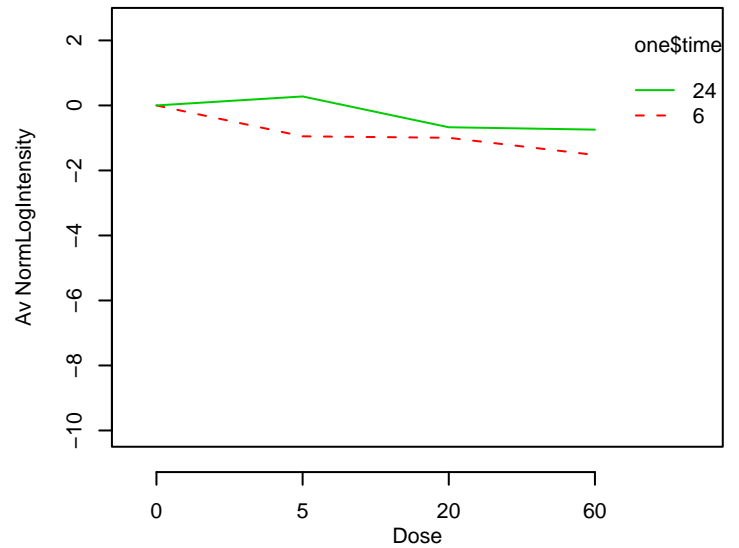

**GO\_0006510 : ATP-dependent proteolysis**

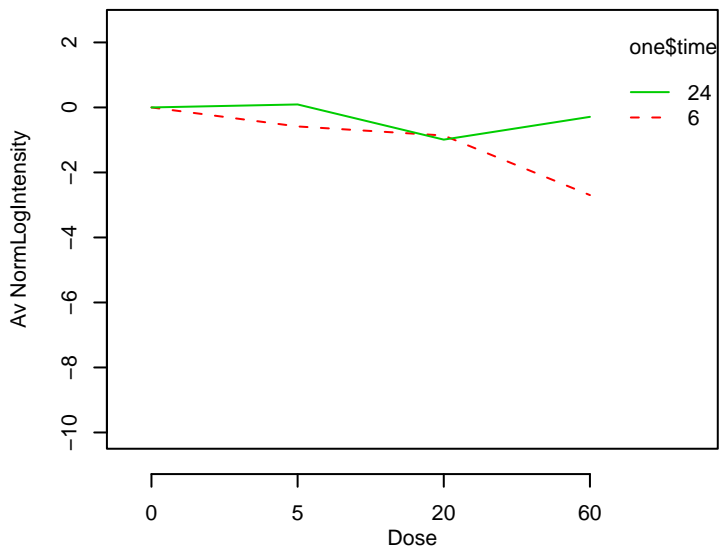

**GO\_0006511 : ubiquitin-dependent protein catabolism**

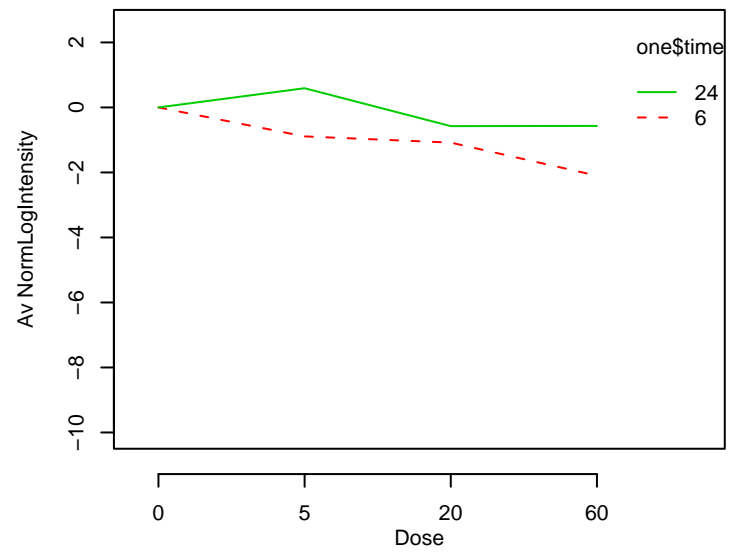

**GO\_0006515 : misfolded or incompletely synthesized protein**

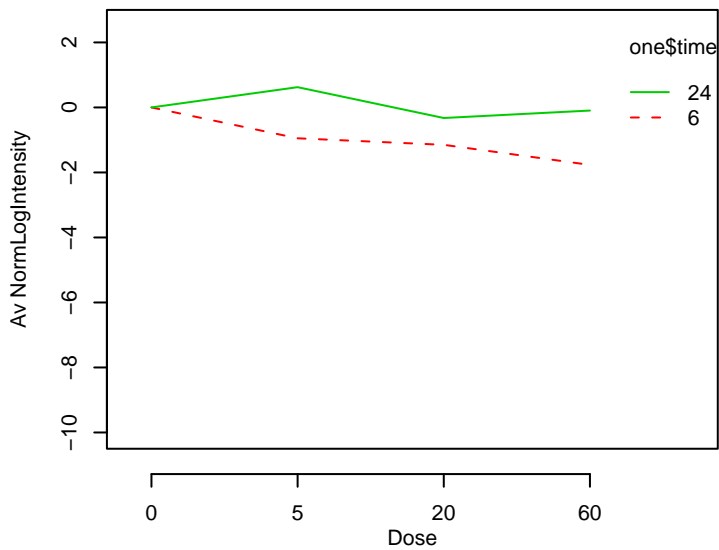

**GO\_0006516 : glycoprotein catabolism**

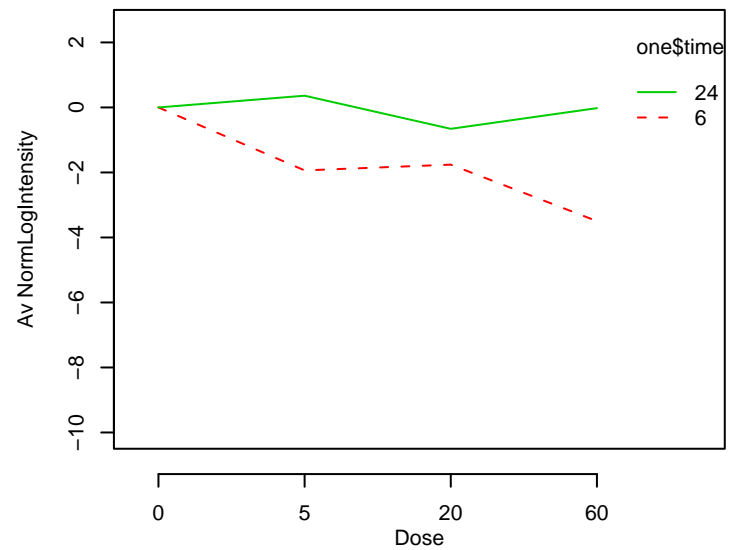

**GO\_0006518 : peptide metabolism**

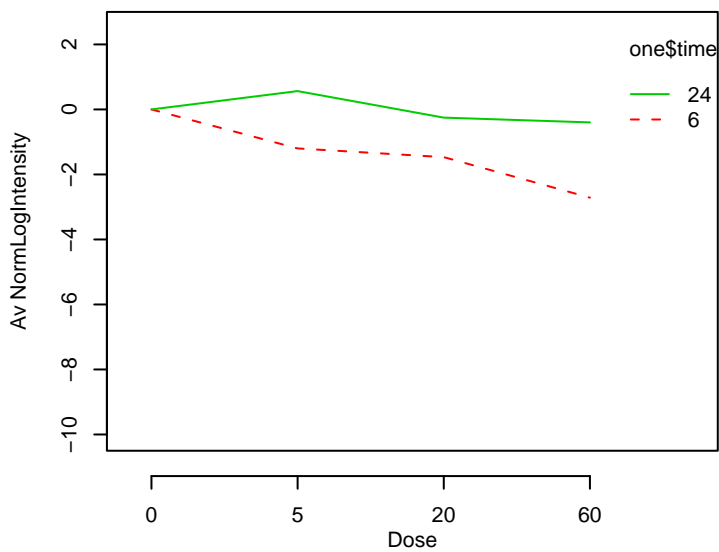

**GO\_0006520 : amino acid metabolism**

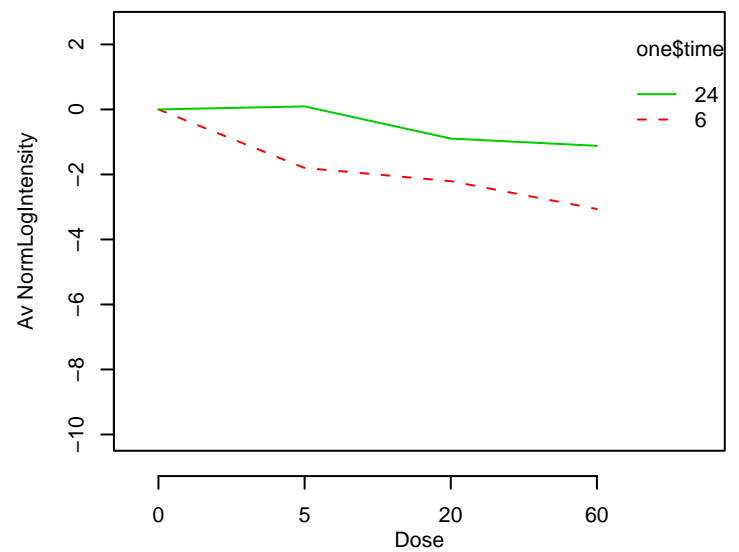

**GO\_0006521 : regulation of amino acid metabolism**

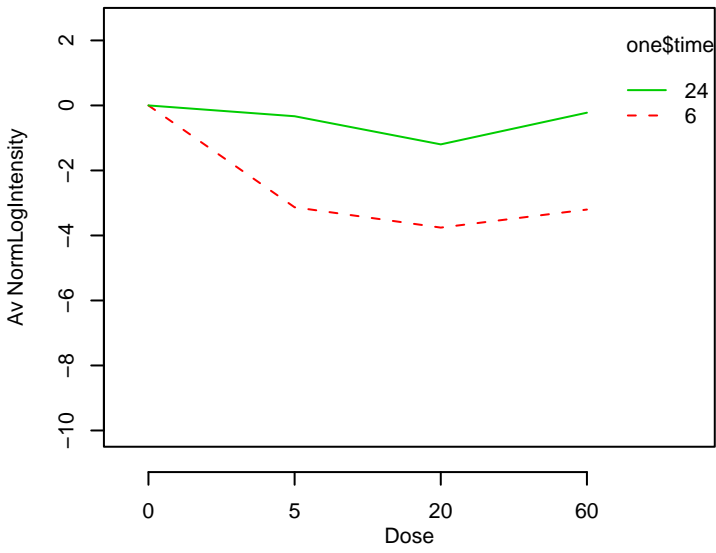

**GO\_0006525 : arginine metabolism**

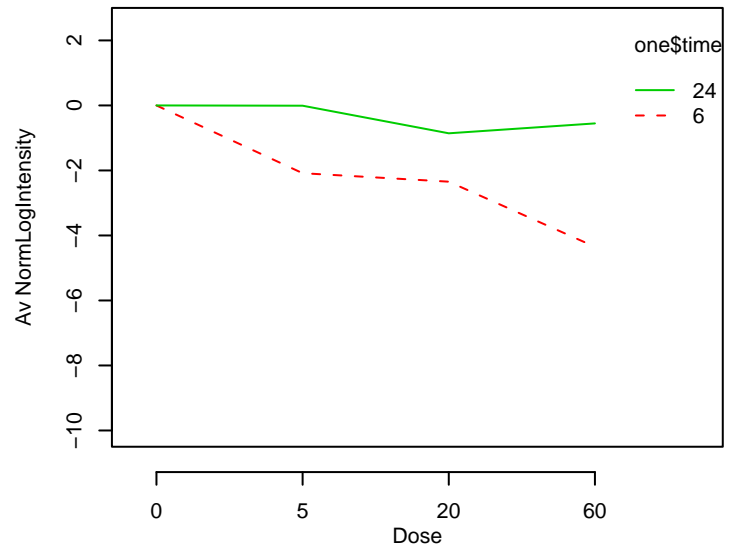

**GO\_0006526 : arginine biosynthesis**

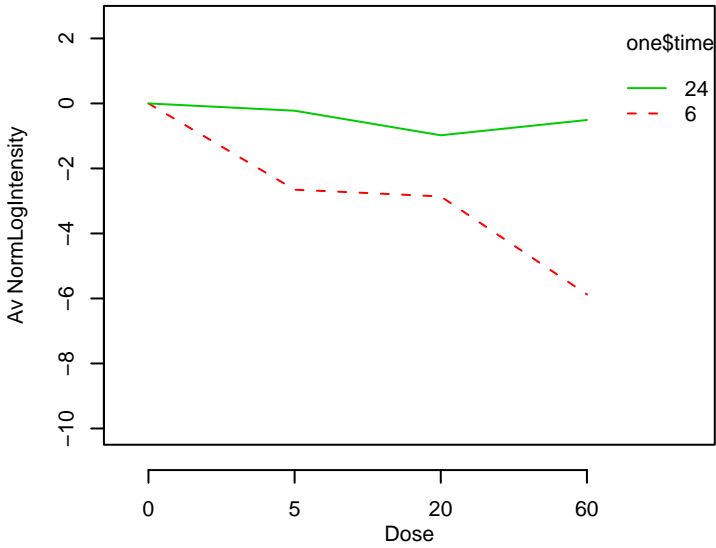

**GO\_0006527 : arginine catabolism**

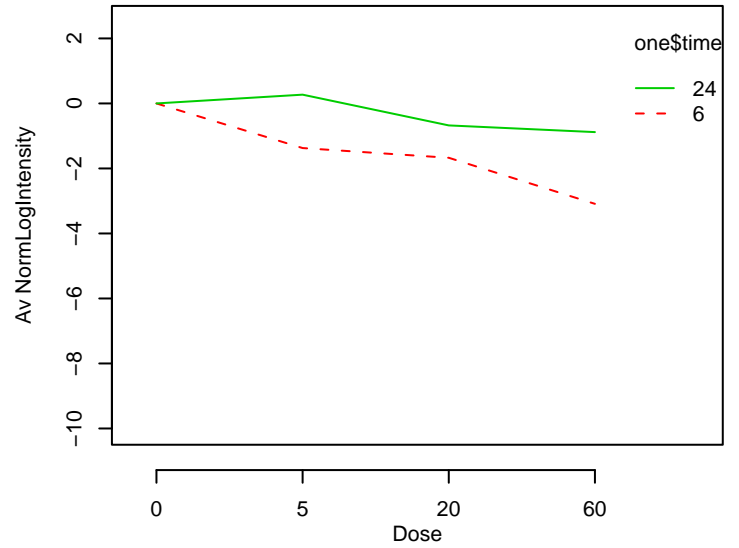

**GO\_0006534 : cysteine metabolism**

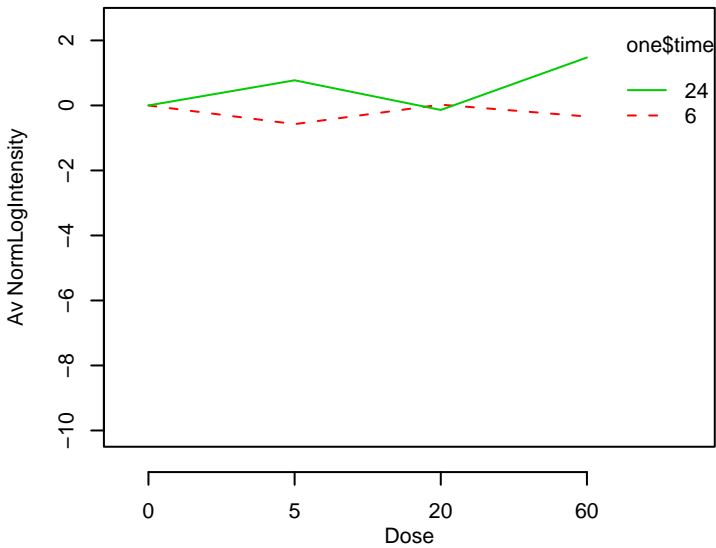

**GO\_0006536 : glutamate metabolism**

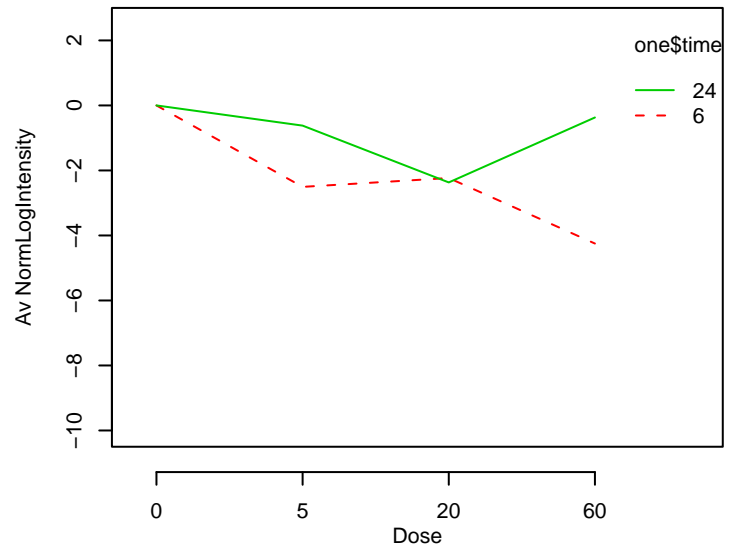



**GO\_0006541 : glutamine metabolism**

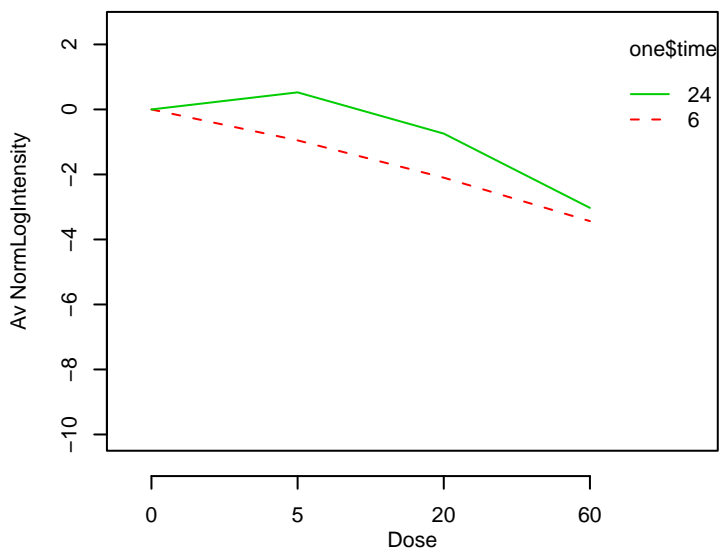

**GO\_0006544 : glycine metabolism**

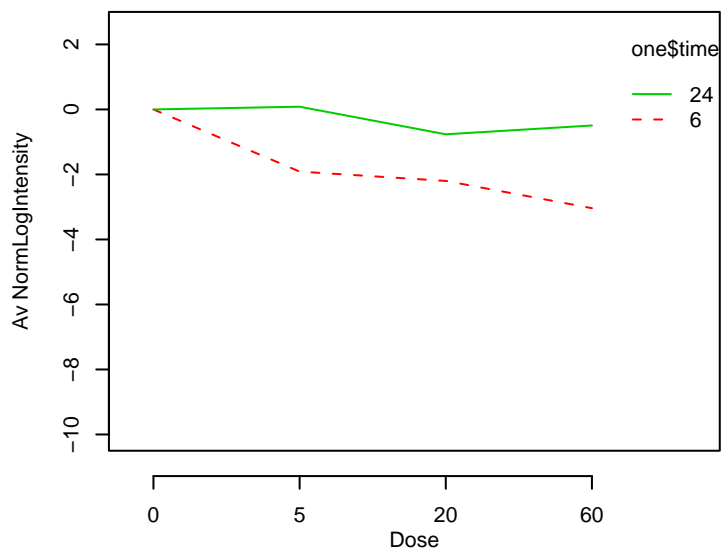

**GO\_0006546 : glycine catabolism**

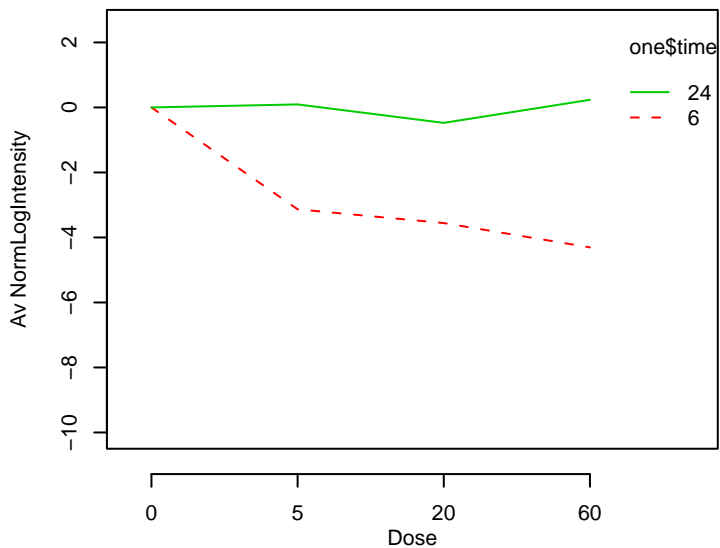

**GO\_0006547 : histidine metabolism**

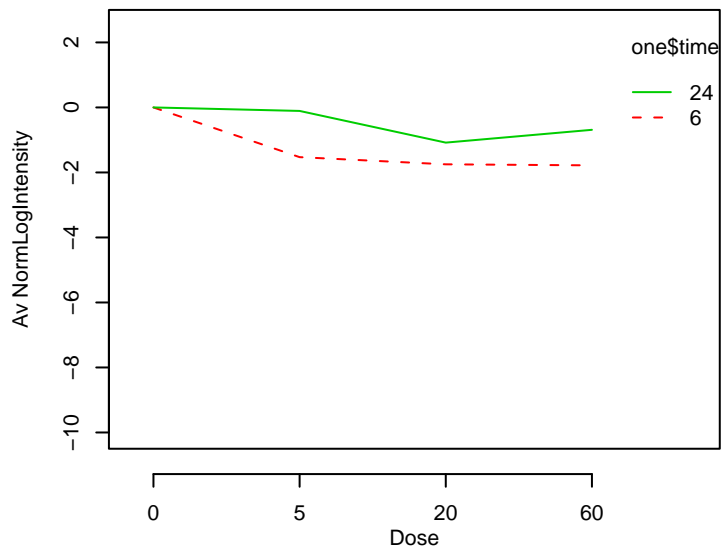

**GO\_0006548 : histidine catabolism**

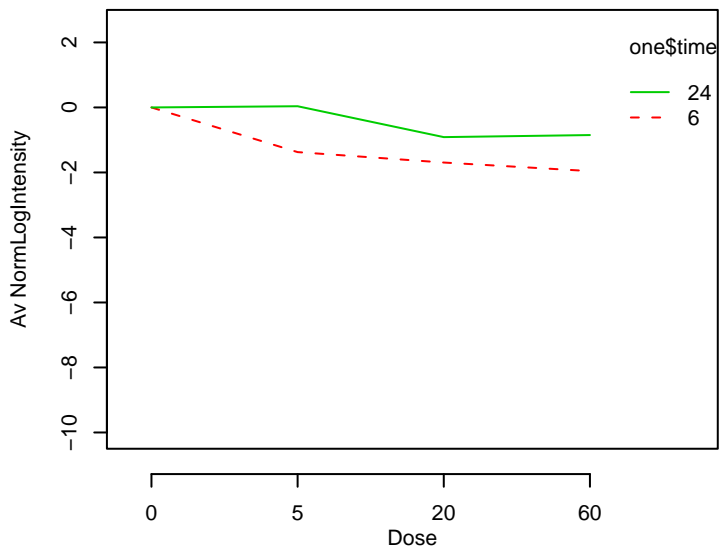

**GO\_0006555 : methionine metabolism**

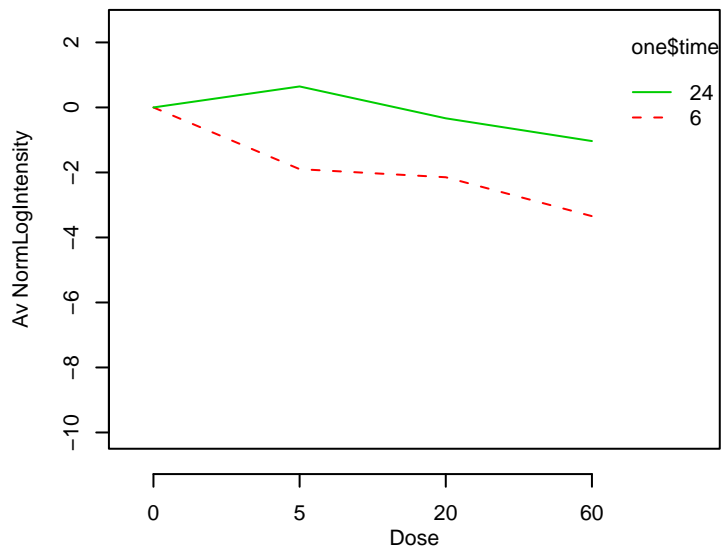

**GO\_0006558 : L-phenylalanine metabolism**

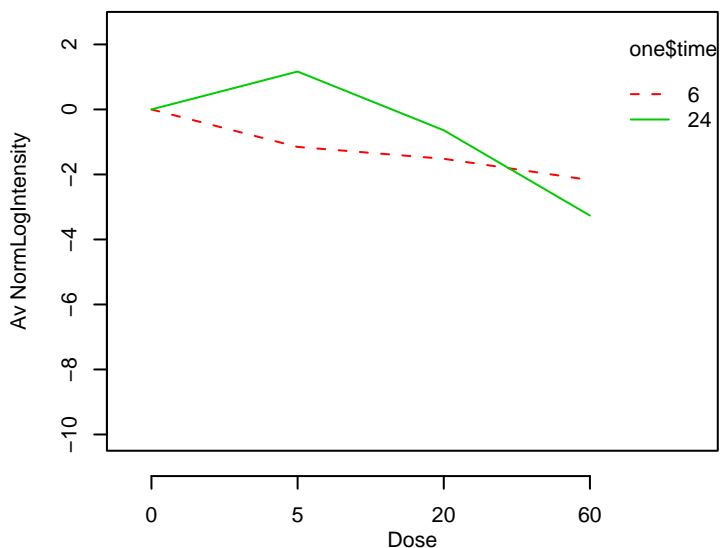

**GO\_0006559 : L-phenylalanine catabolism**

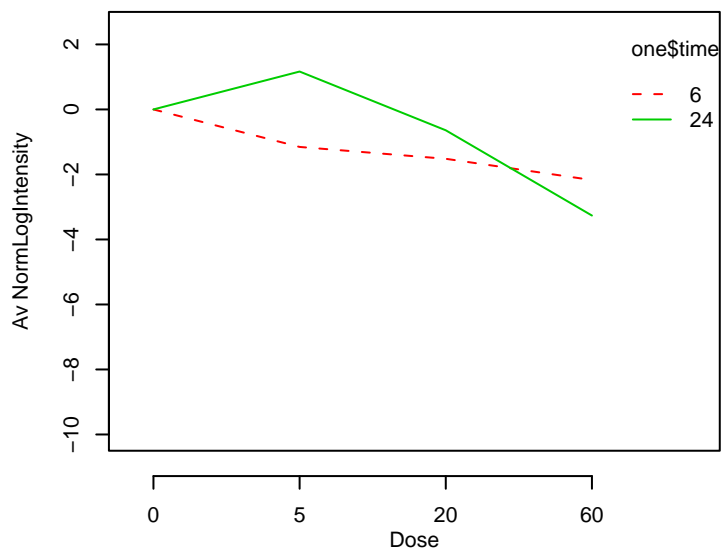

**GO\_0006560 : proline metabolism**

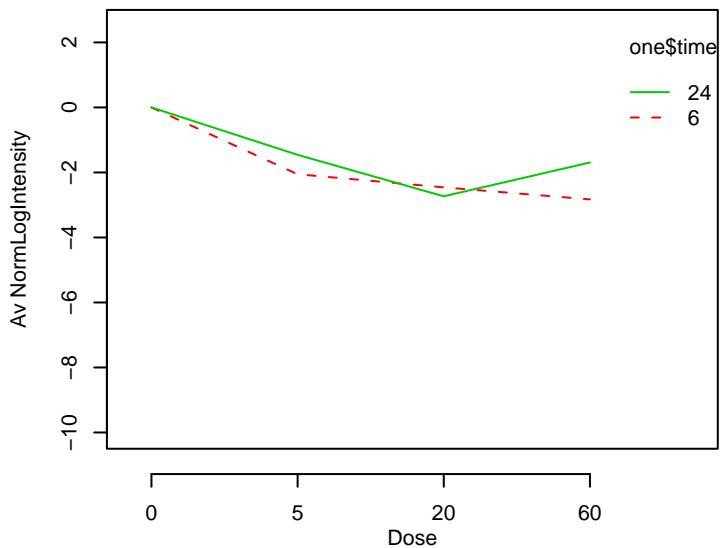

**GO\_0006561 : proline biosynthesis**

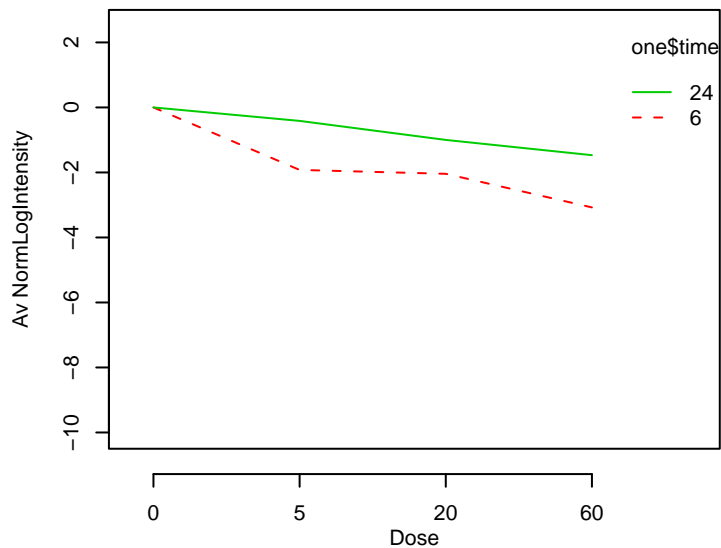

**GO\_0006563 : L-serine metabolism**

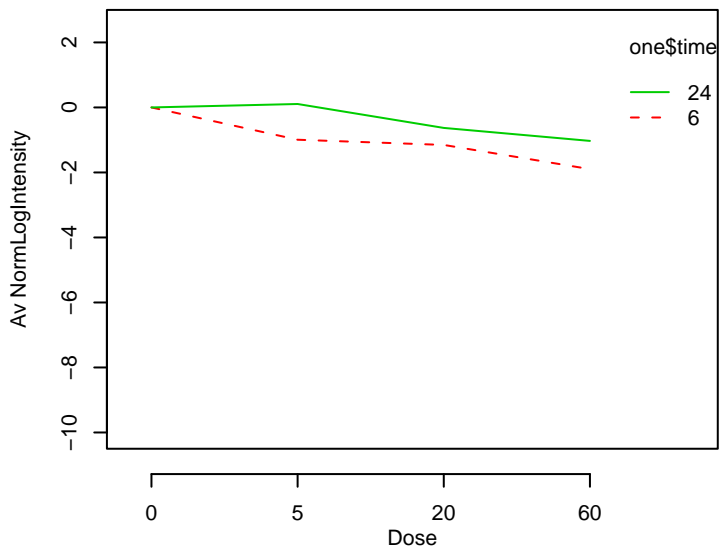

**GO\_0006564 : L-serine biosynthesis**

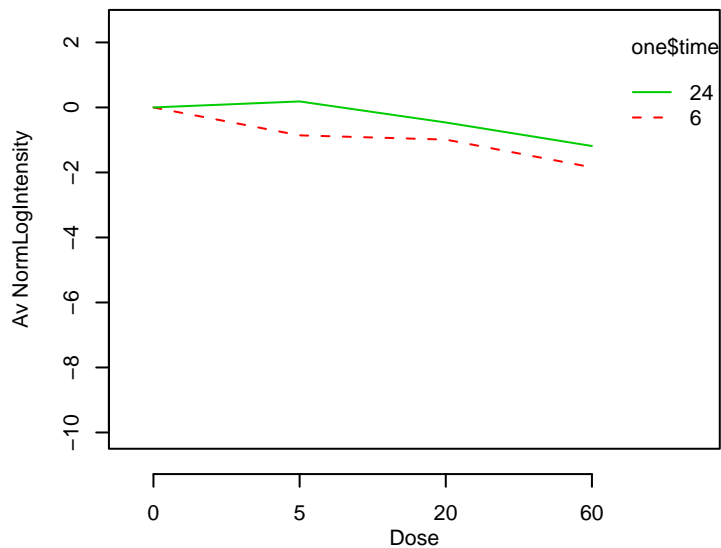

**GO\_0006568 : tryptophan metabolism**

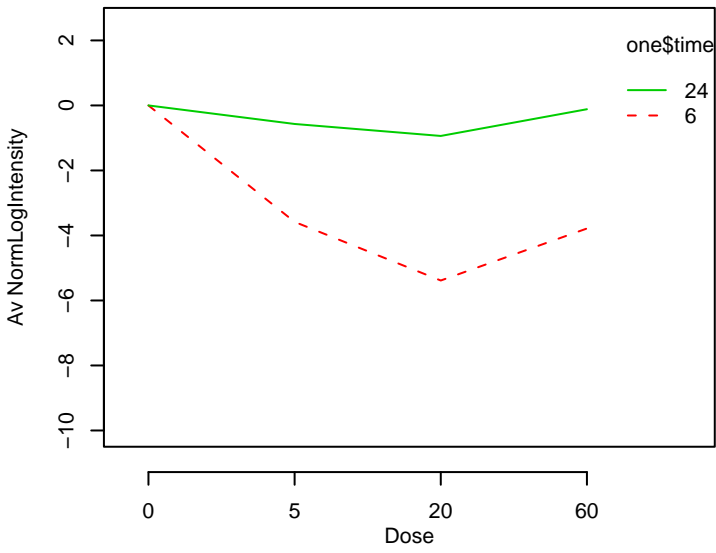

**GO\_0006570 : tyrosine metabolism**

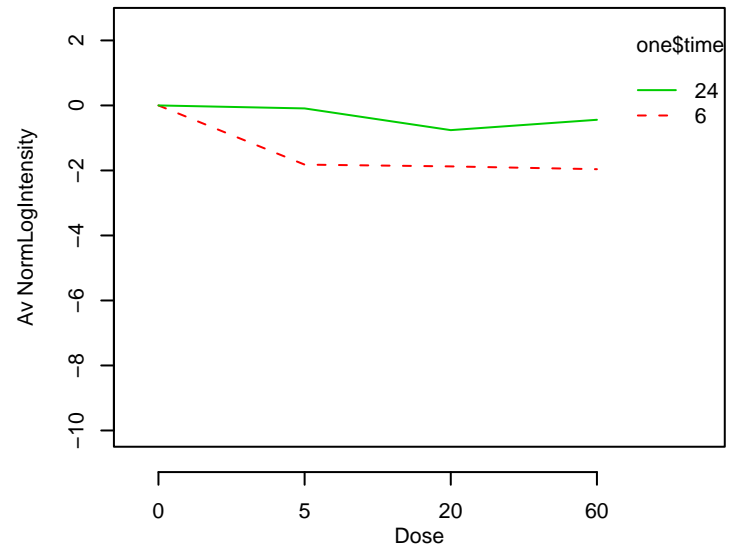

**GO\_0006572 : tyrosine catabolism**

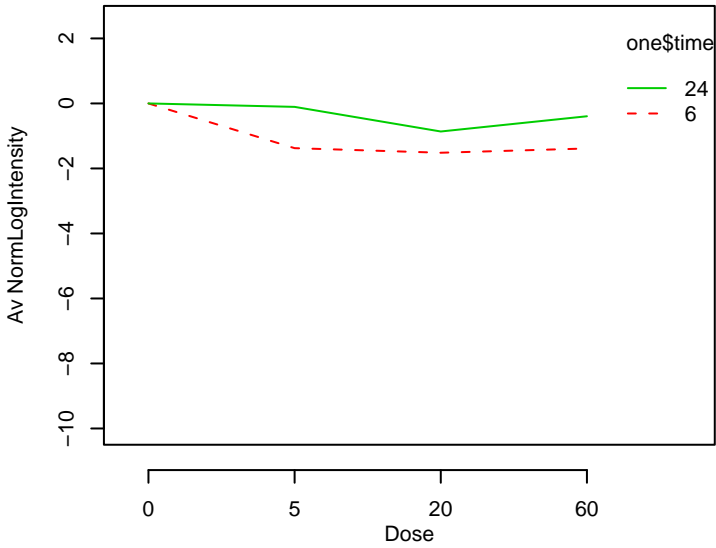

**GO\_0006575 : amino acid derivative metabolism**

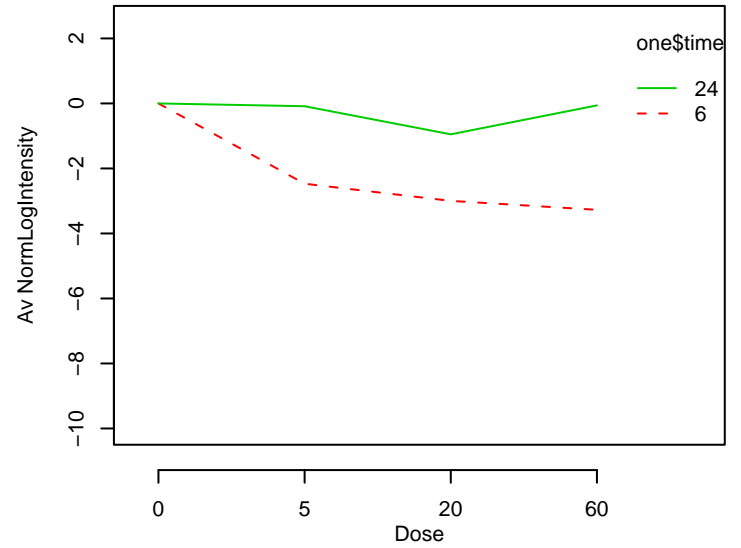

**GO\_0006576 : biogenic amine metabolism**

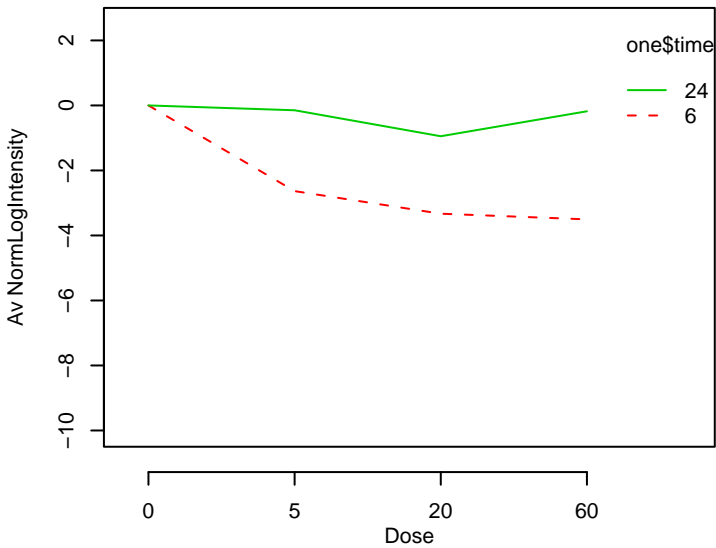

**GO\_0006582 : melanin metabolism**

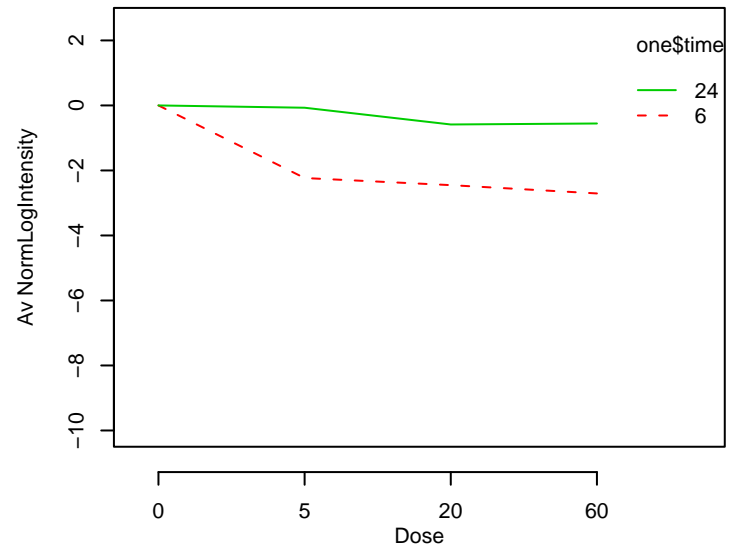

**GO\_0006583 : melanin biosynthesis from tyrosine**

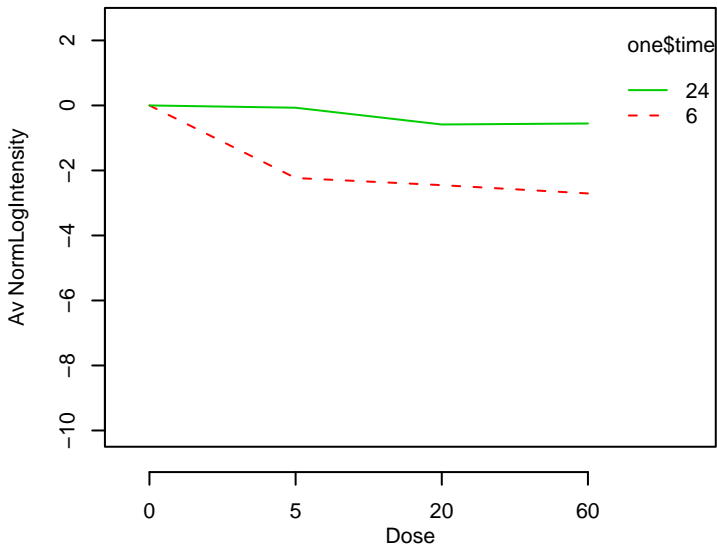

**GO\_0006584 : catecholamine metabolism**

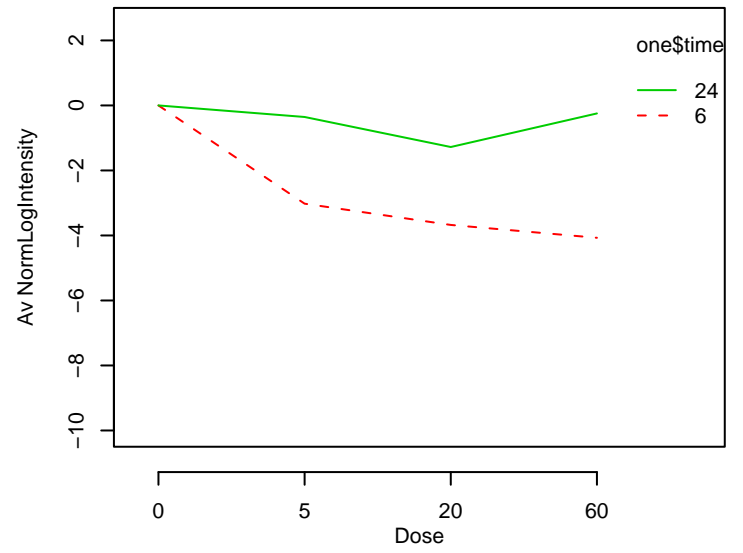

**GO\_0006586 : indolalkylamine metabolism**

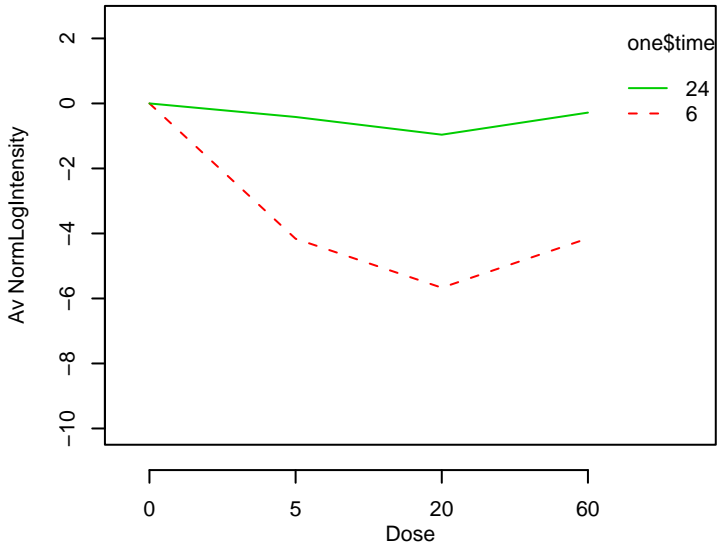

**GO\_0006590 : thyroid hormone generation**

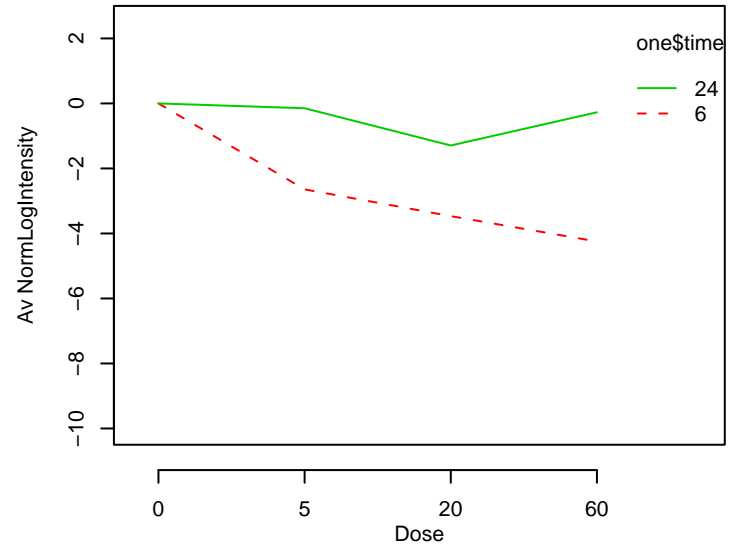

**GO\_0006595 : polyamine metabolism**

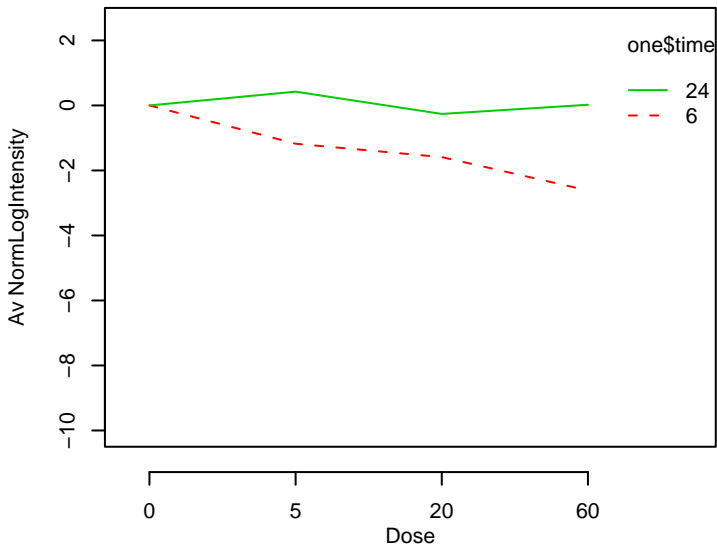

**GO\_0006596 : polyamine biosynthesis**

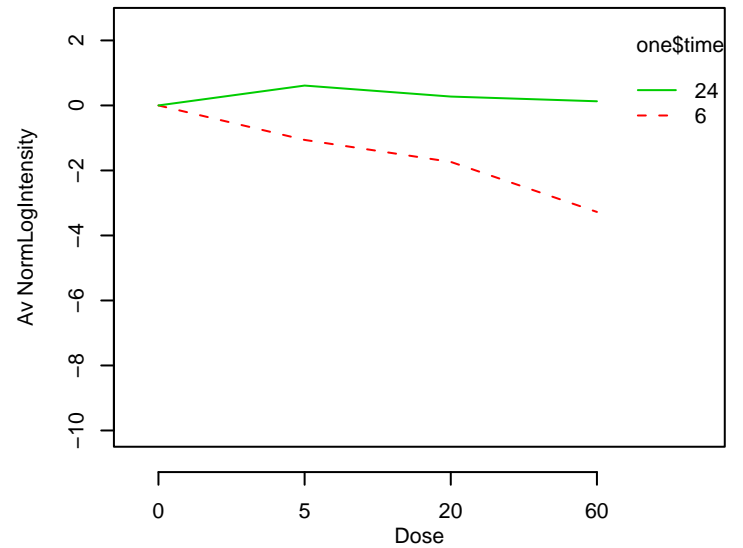

**GO\_0006605 : protein targeting**

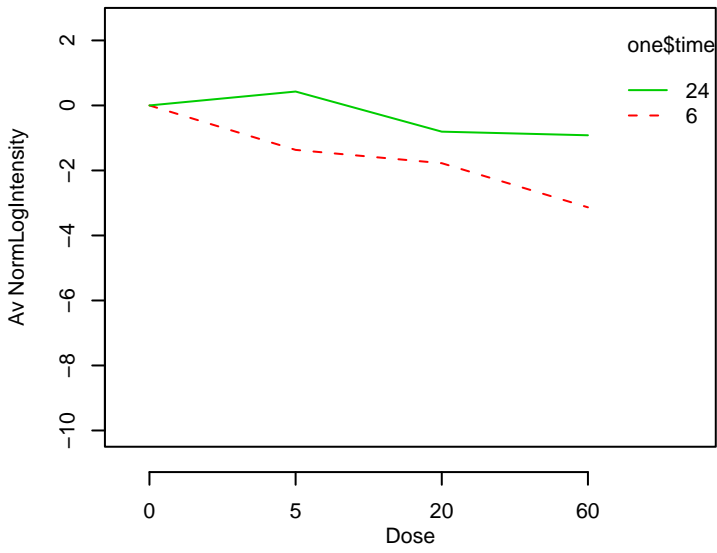

**GO\_0006606 : protein import into nucleus**

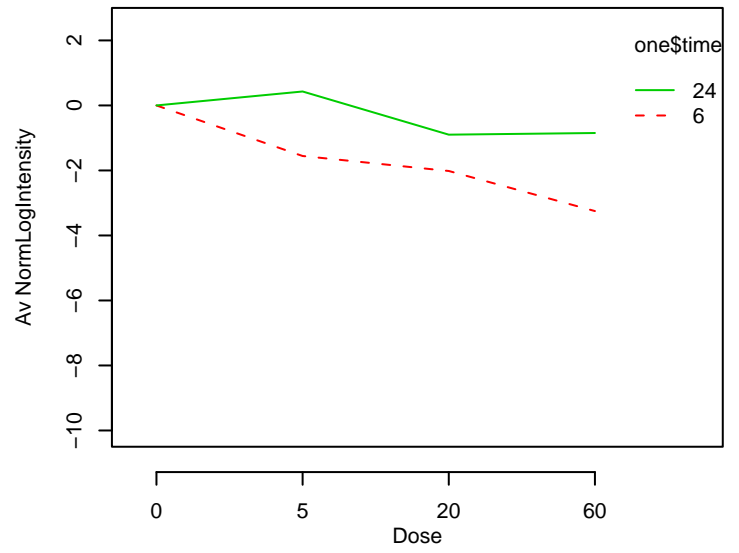

**GO\_0006607 : NLS-bearing substrate import into nucleus**

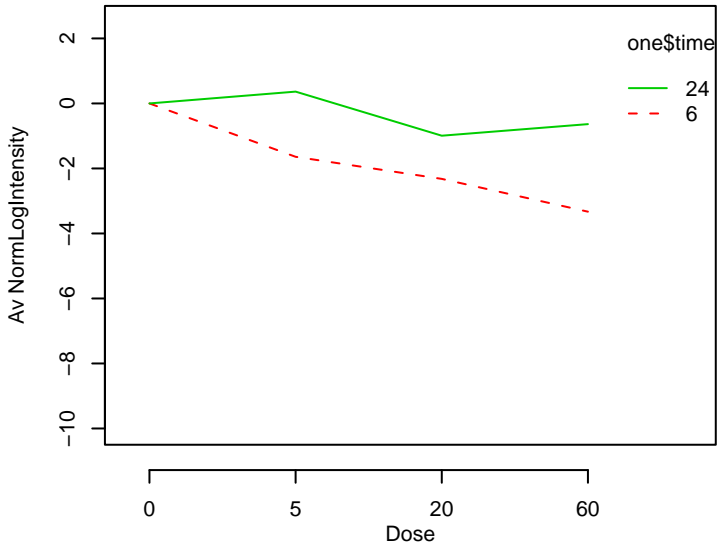

**GO\_0006611 : protein export from nucleus**

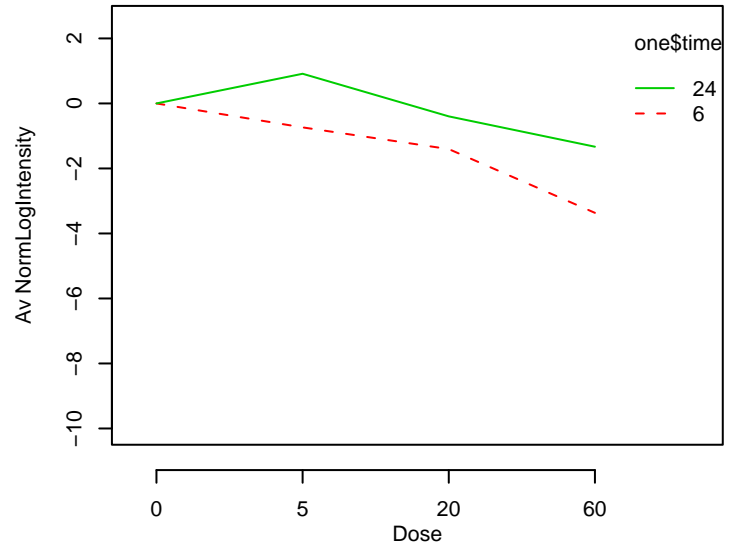

**GO\_0006612 : protein targeting to membrane**

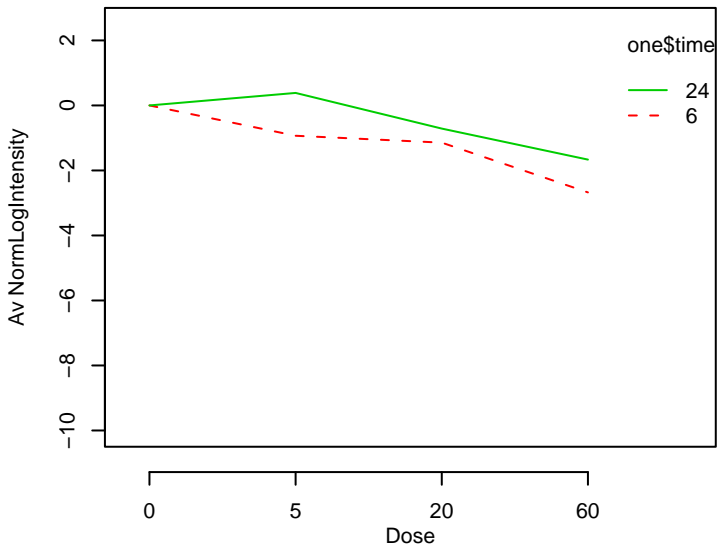

**GO\_0006613 : cotranslational protein targeting to membra**

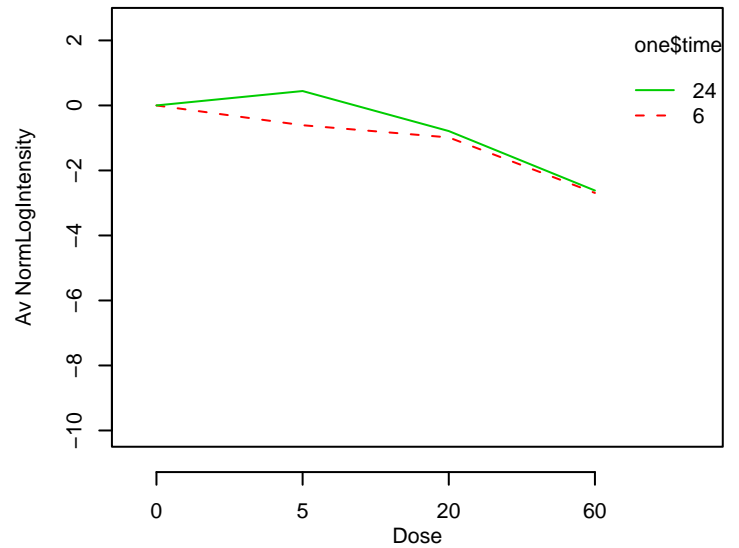

**GO\_0006621 : protein retention in ER**

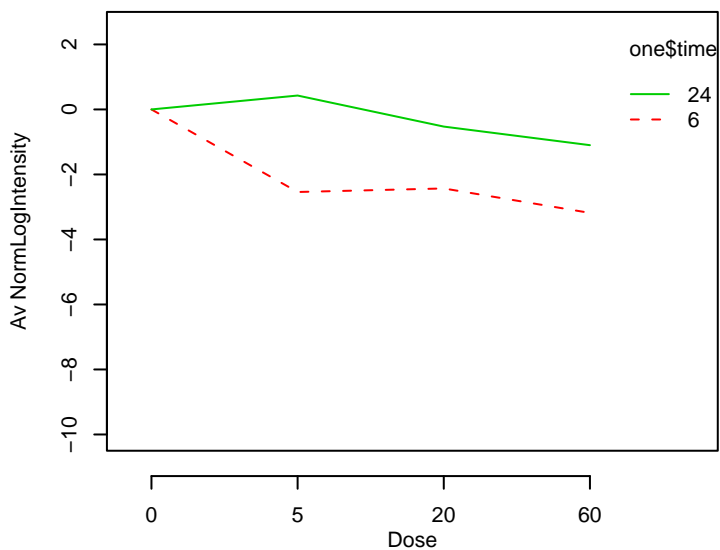

**GO\_0006625 : protein targeting to peroxisome**

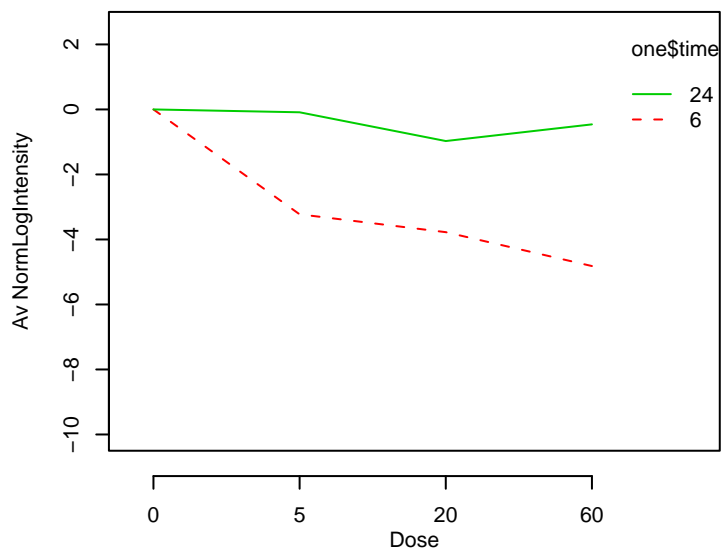

**GO\_0006626 : protein targeting to mitochondrion**

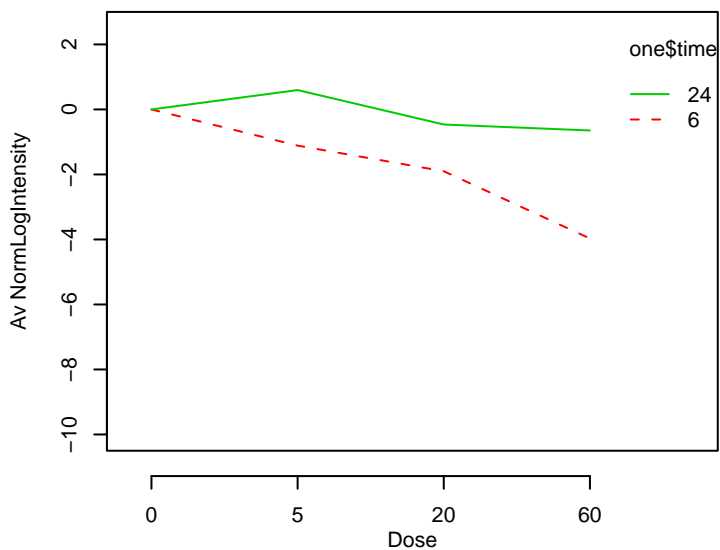

**GO\_0006631 : fatty acid metabolism**

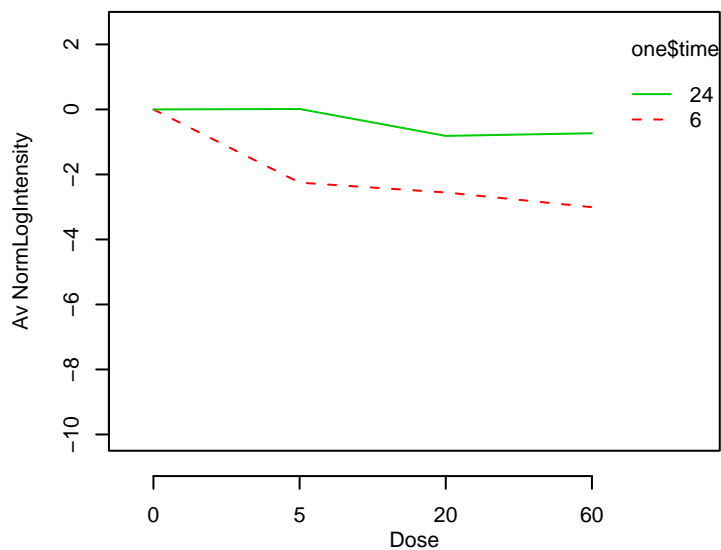

**GO\_0006633 : fatty acid biosynthesis**

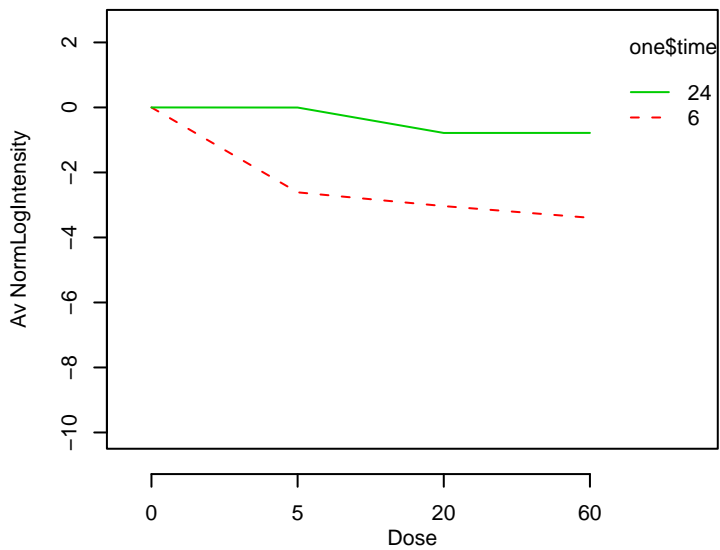

**GO\_0006635 : fatty acid beta-oxidation**

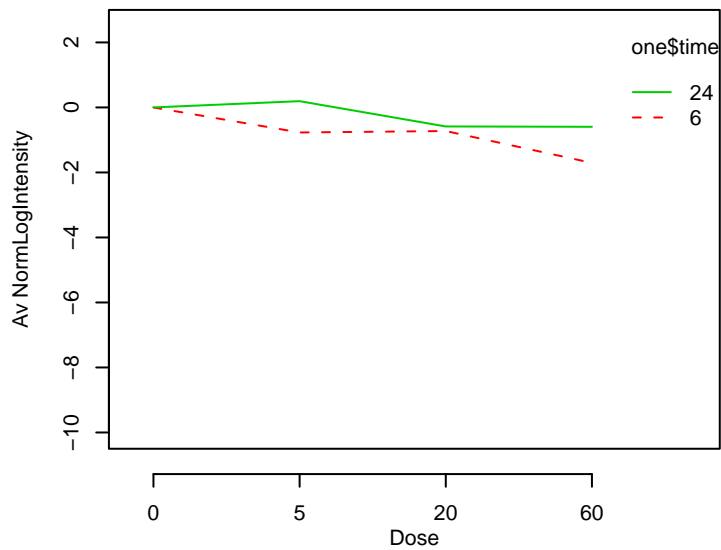

**GO\_0006636 : fatty acid desaturation**

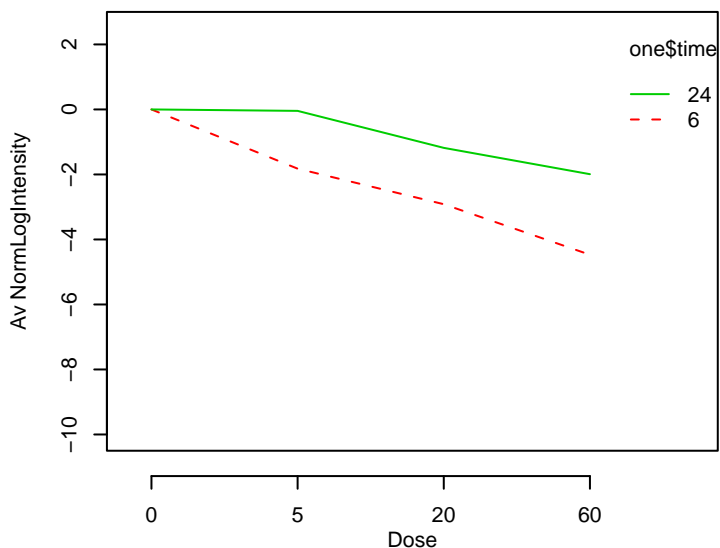

**GO\_0006637 : acyl-CoA metabolism**

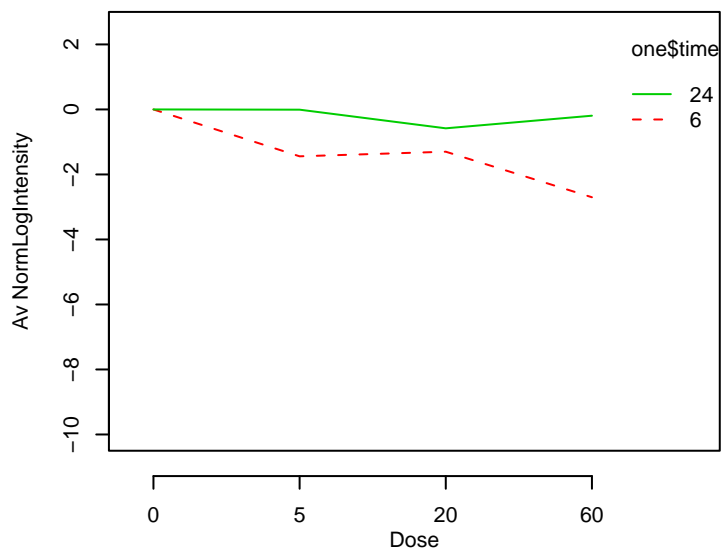

**GO\_0006638 : neutral lipid metabolism**

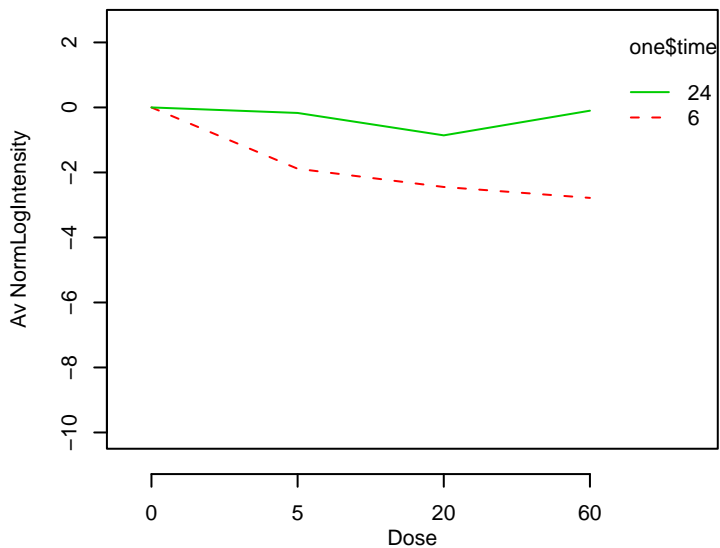

**GO\_0006639 : acylglycerol metabolism**

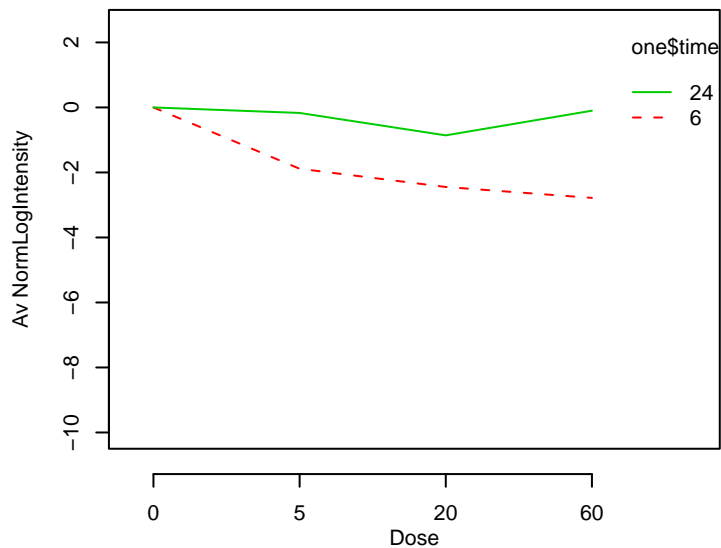

**GO\_0006641 : triacylglycerol metabolism**

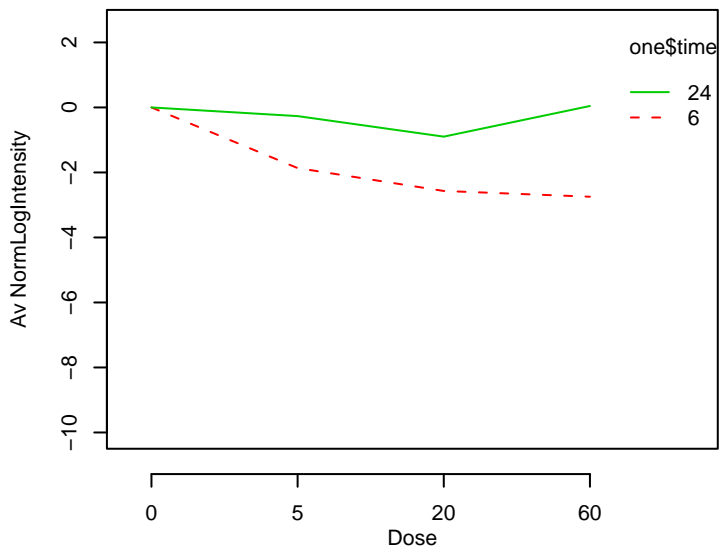

**GO\_0006643 : membrane lipid metabolism**

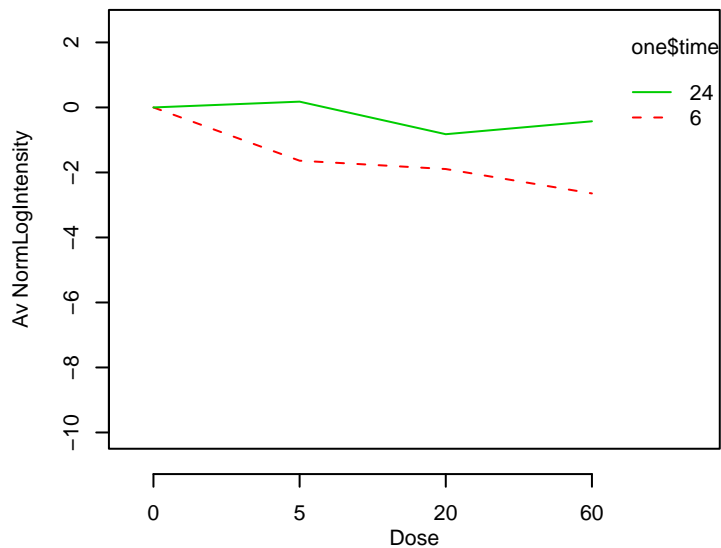

**GO\_0006644 : phospholipid metabolism**

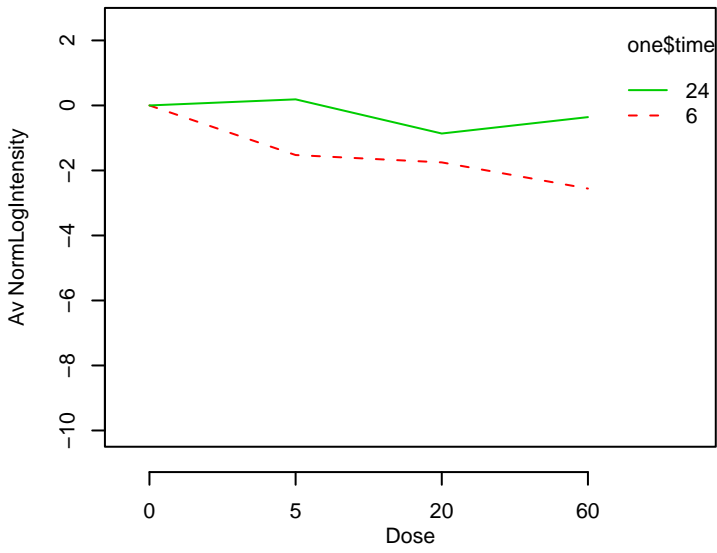

**GO\_0006650 : glycerophospholipid metabolism**

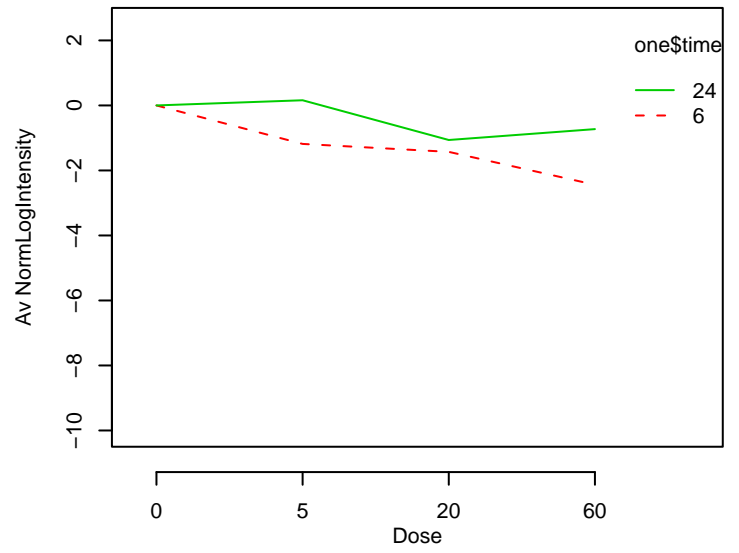

**GO\_0006656 : phosphatidylcholine biosynthesis**

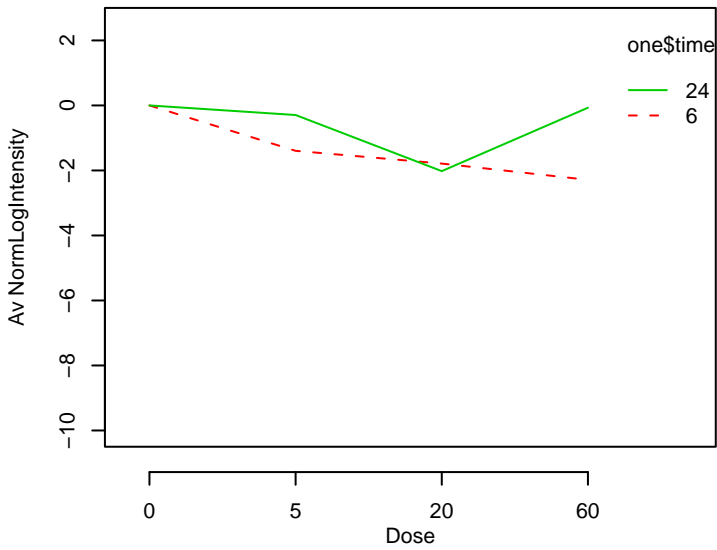

**GO\_0006661 : phosphatidylinositol biosynthesis**

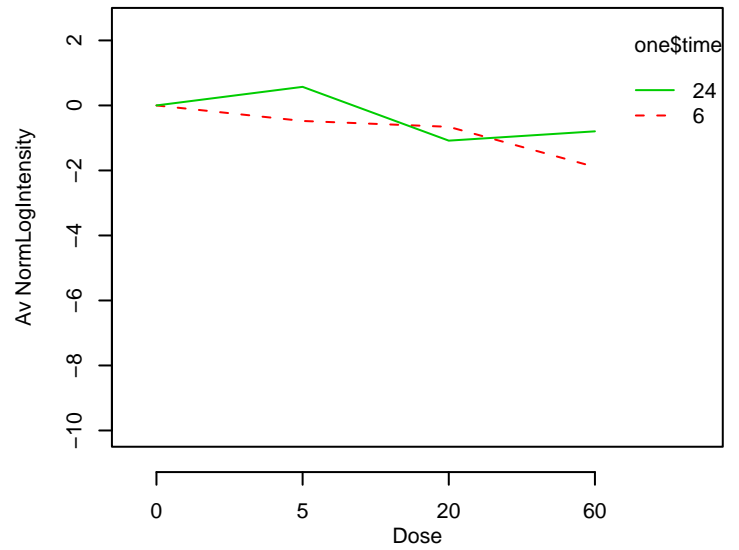

**GO\_0006662 : glycerol ether metabolism**

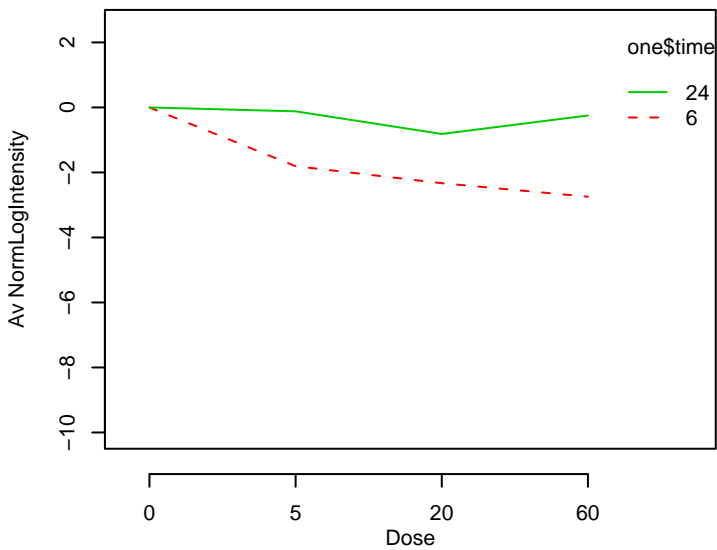

**GO\_0006664 : glycolipid metabolism**

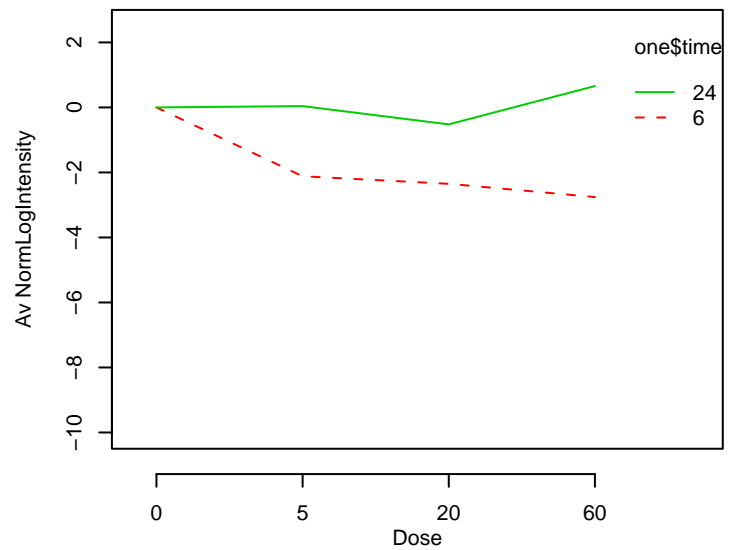



**GO\_0006665 : sphingolipid metabolism**

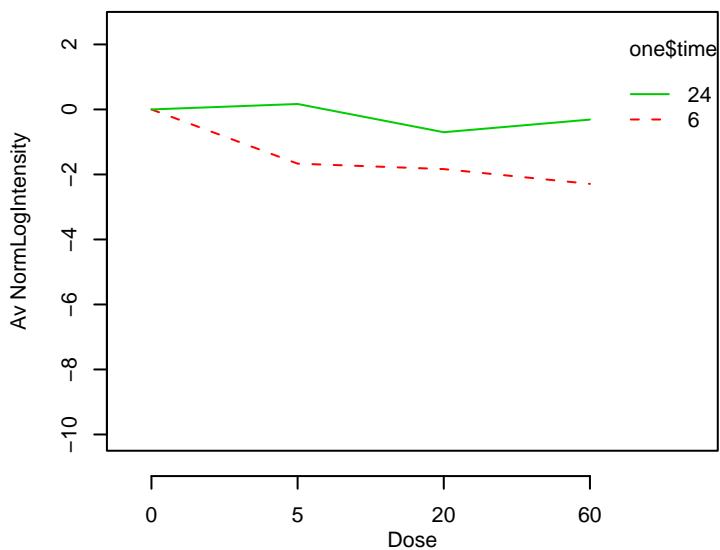

**GO\_0006672 : ceramide metabolism**

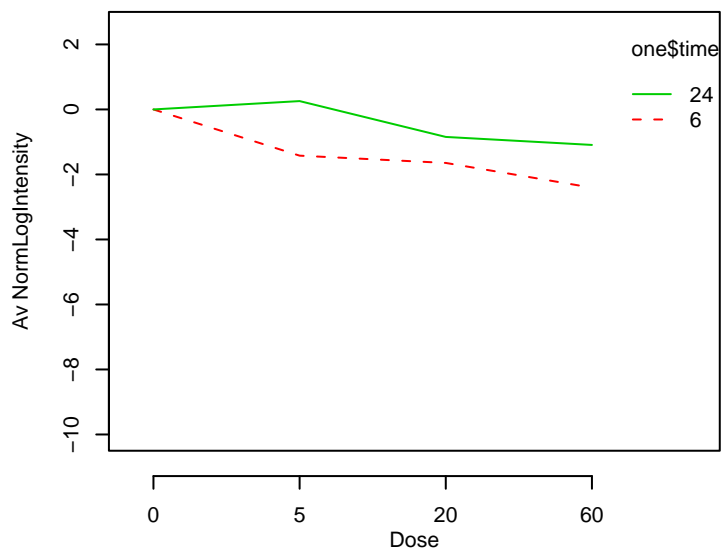

**GO\_0006677 : glycosylceramide metabolism**

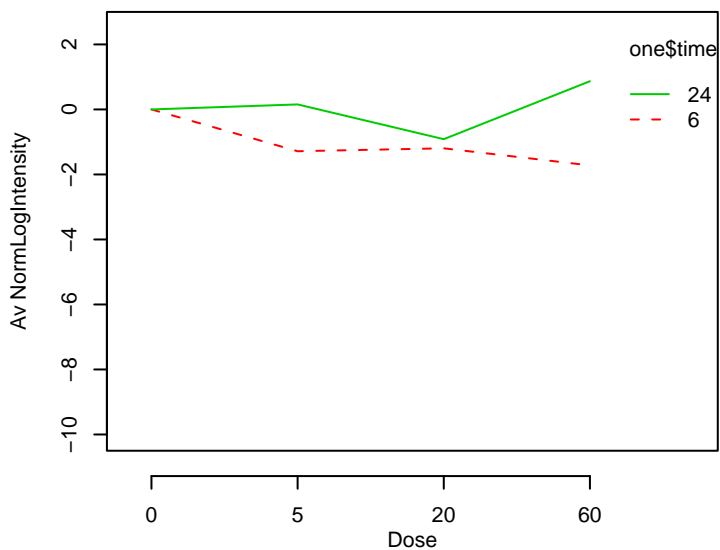

**GO\_0006684 : sphingomyelin metabolism**

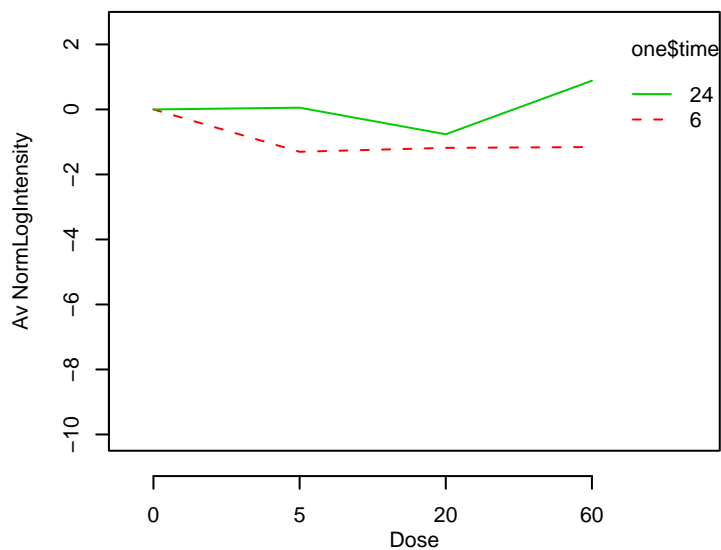

**GO\_0006687 : glycosphingolipid metabolism**

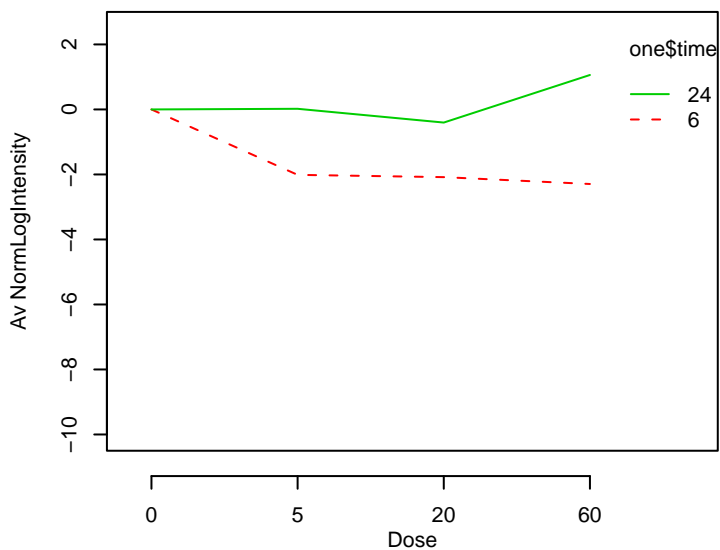

**GO\_0006688 : glycosphingolipid biosynthesis**

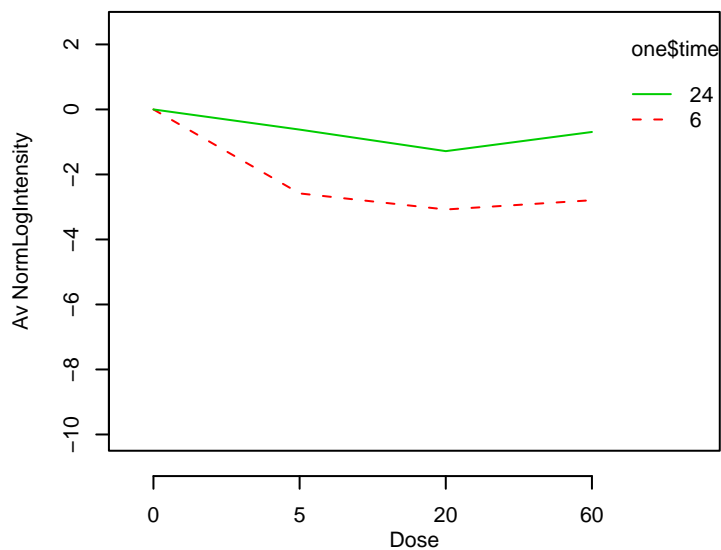

**GO\_0006690 : icosanoid metabolism**

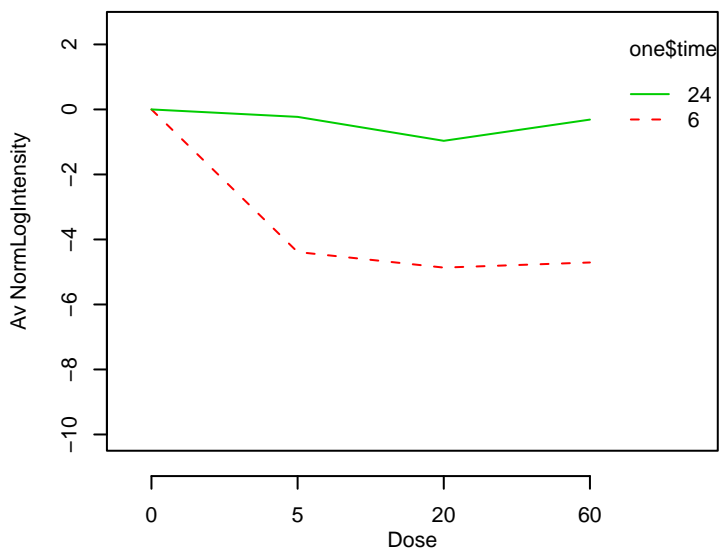

**GO\_0006691 : leukotriene metabolism**

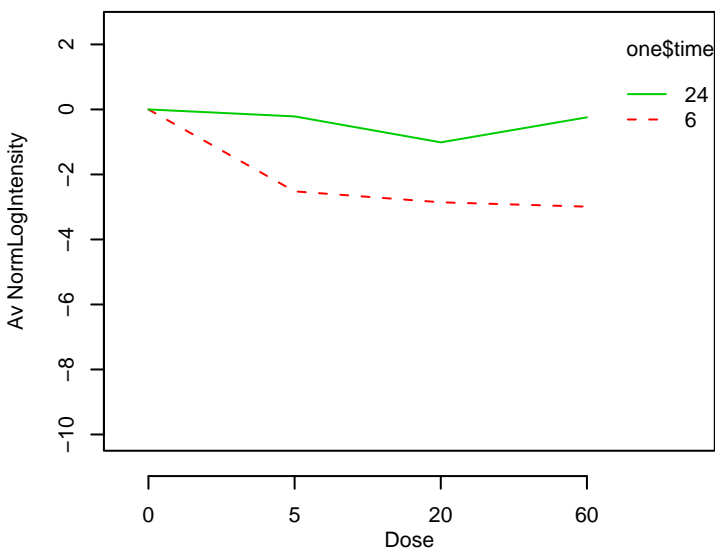

**GO\_0006692 : prostanoid metabolism**

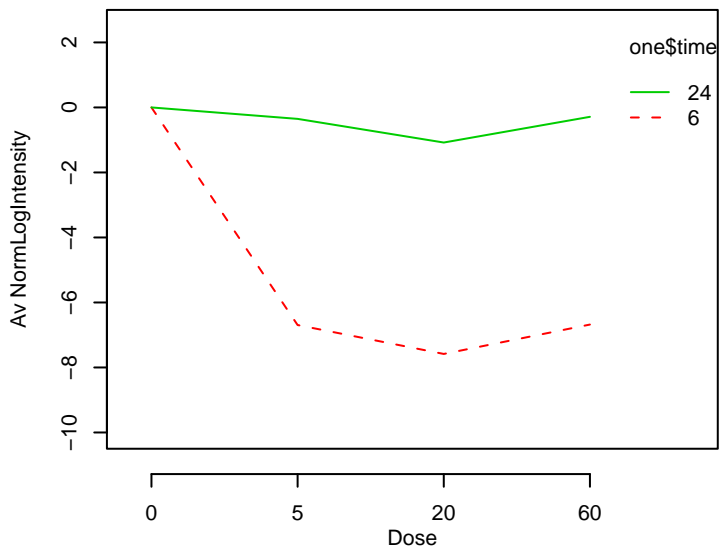

**GO\_0006693 : prostaglandin metabolism**

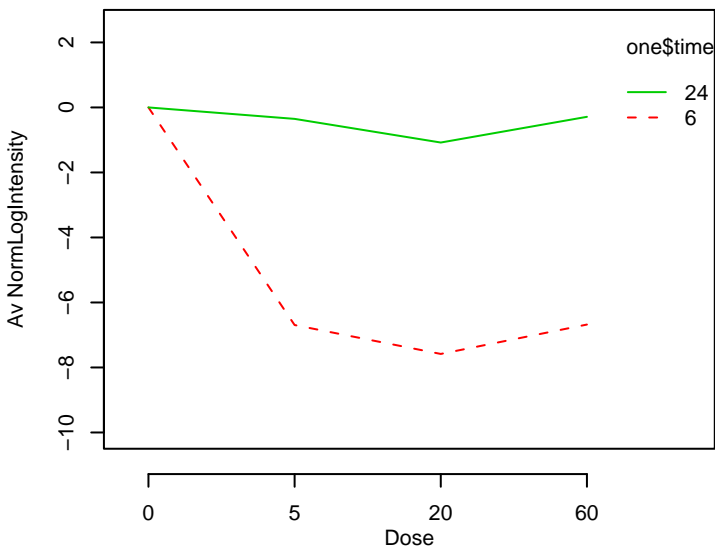

**GO\_0006694 : steroid biosynthesis**

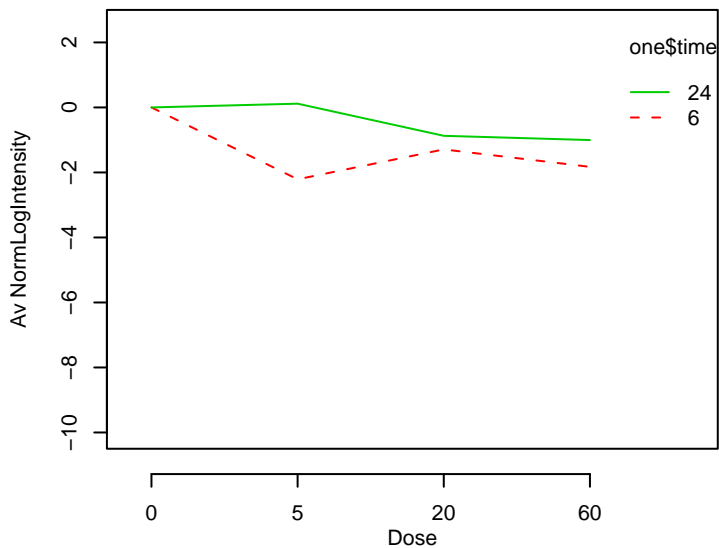

**GO\_0006695 : cholesterol biosynthesis**

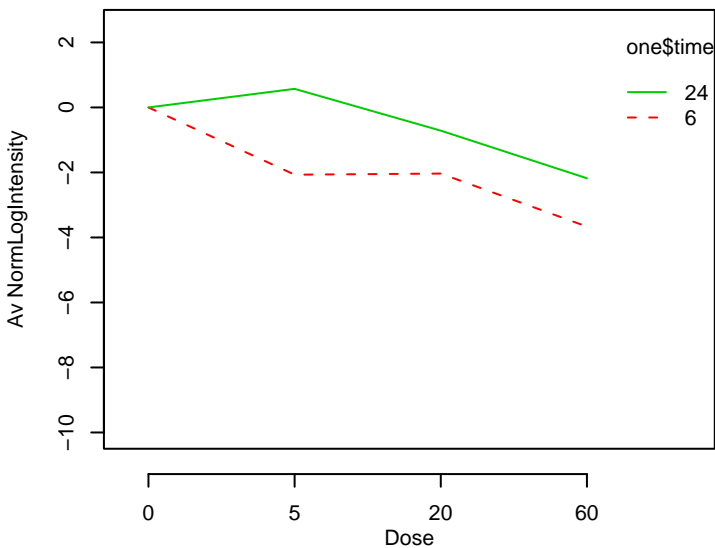

**GO\_0006699 : bile acid biosynthesis**

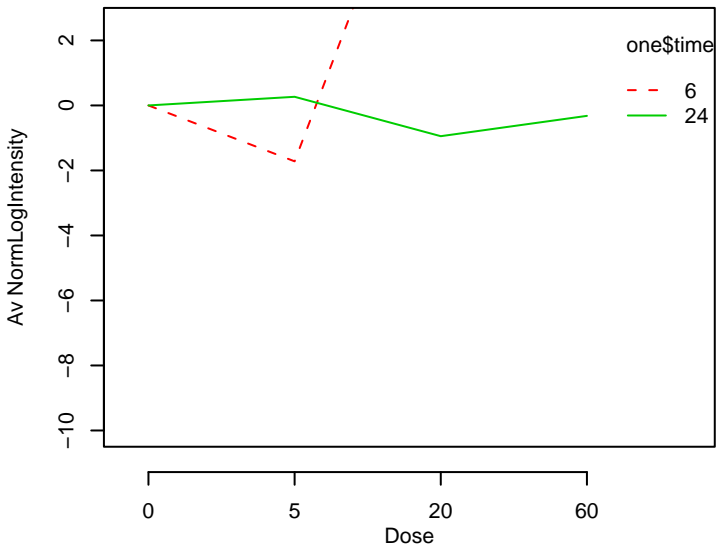

**GO\_0006700 : C21-steroid hormone biosynthesis**

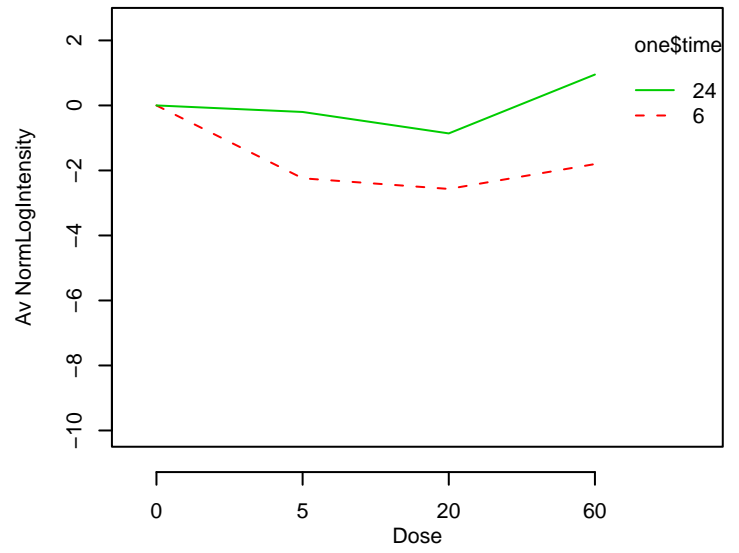

**GO\_0006702 : androgen biosynthesis**

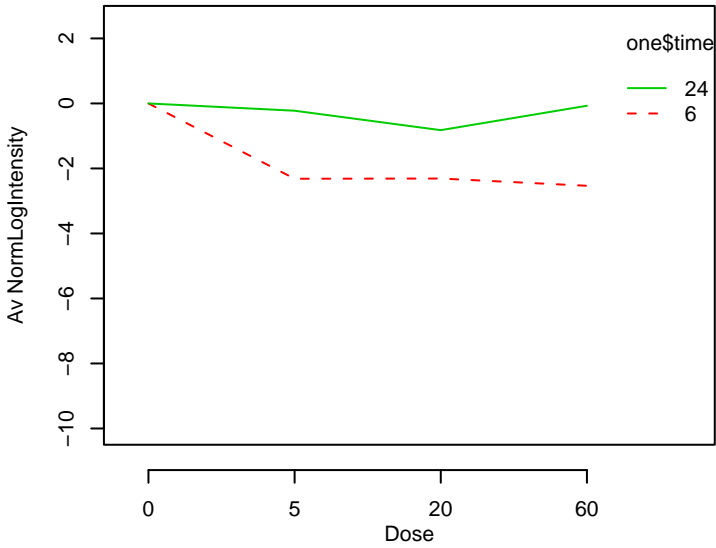

**GO\_0006703 : estrogen biosynthesis**

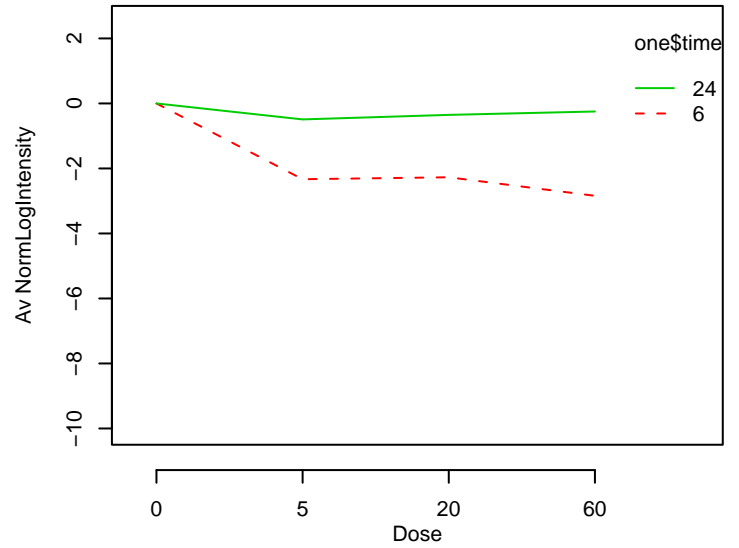

**GO\_0006706 : steroid catabolism**

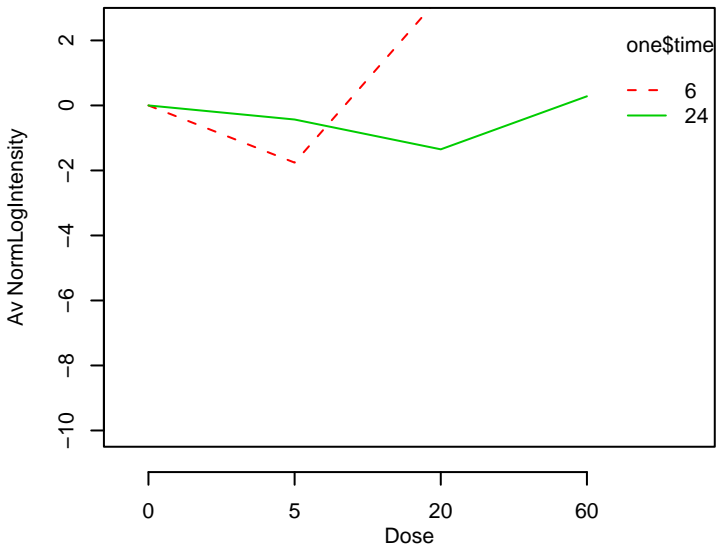

**GO\_0006707 : cholesterol catabolism**

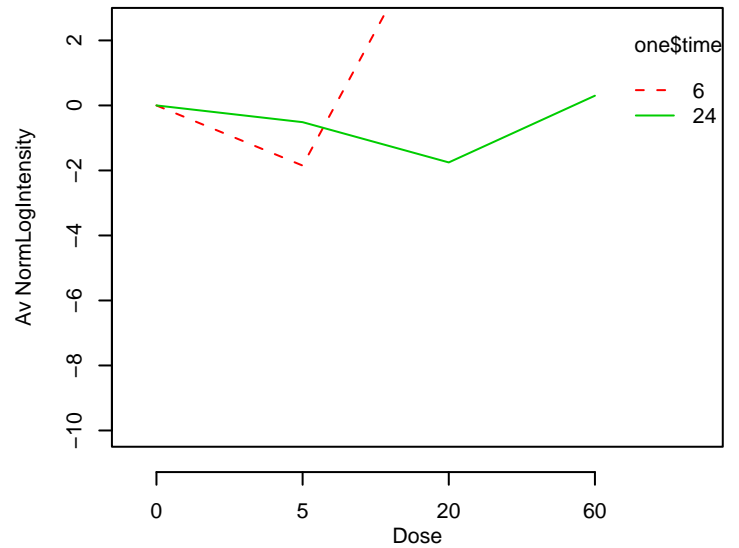

**GO\_0006720 : isoprenoid metabolism**

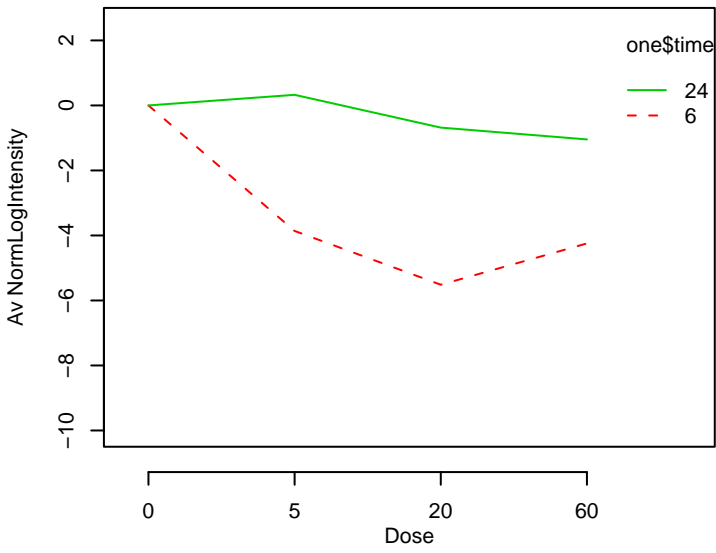

**GO\_0006721 : terpenoid metabolism**

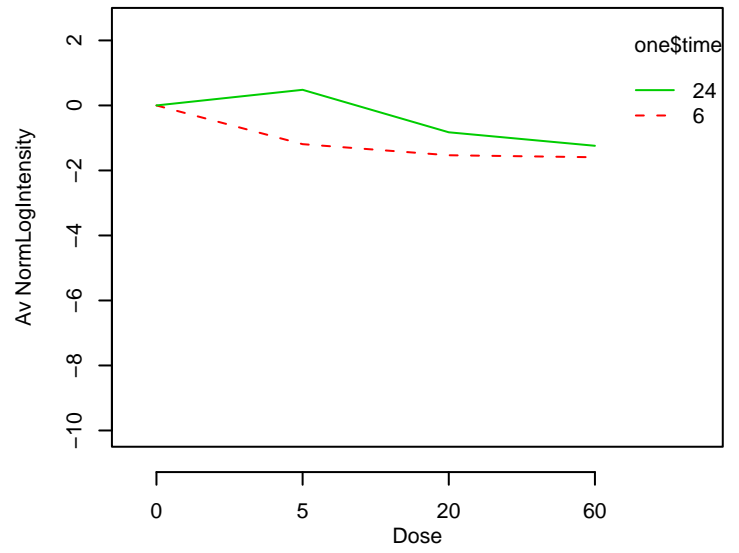

**GO\_0006725 : aromatic compound metabolism**

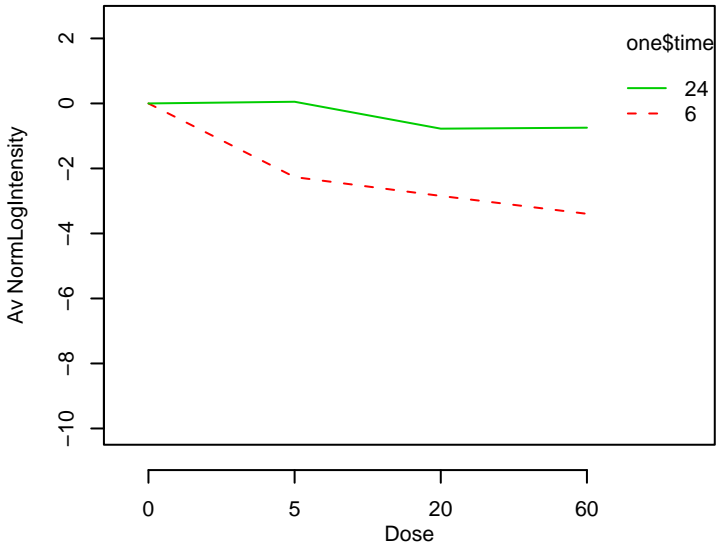

**GO\_0006729 : tetrahydrobiopterin biosynthesis**

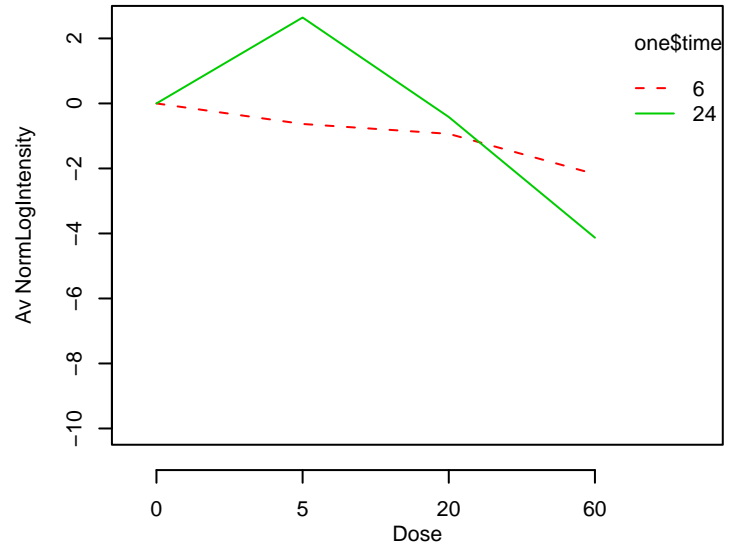

**GO\_0006730 : one-carbon compound metabolism**

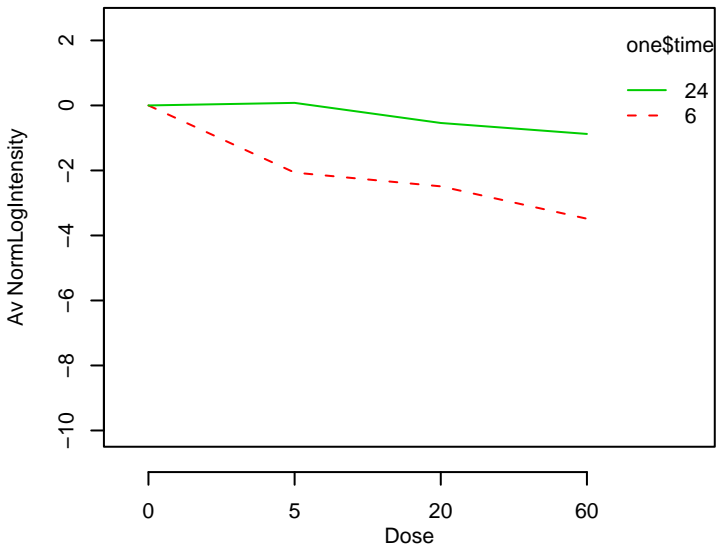

**GO\_0006732 : coenzyme metabolism**

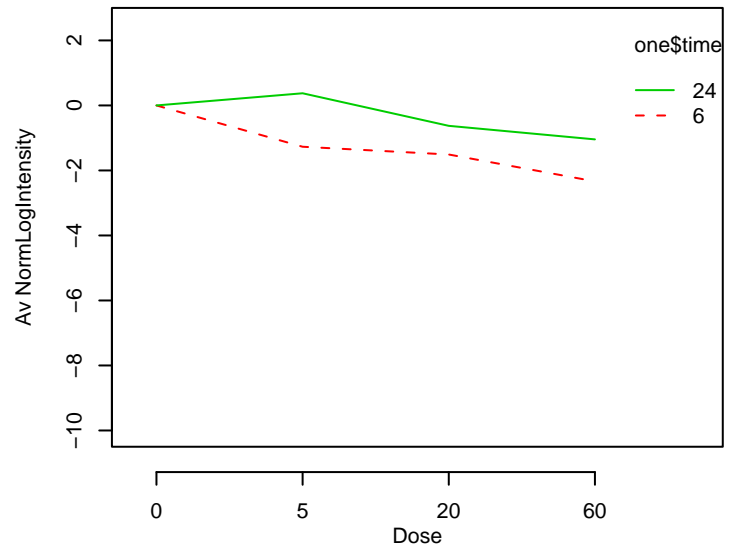

**GO\_0006733 : oxidoreduction coenzyme metabolism**

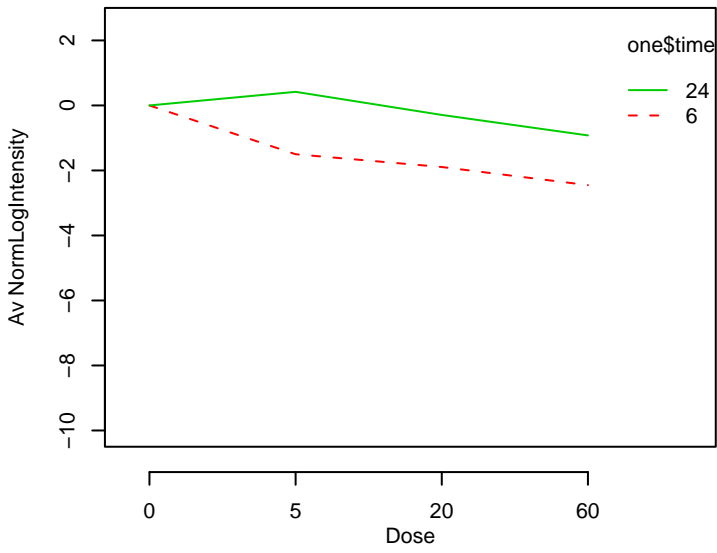

**GO\_0006739 : NADP metabolism**

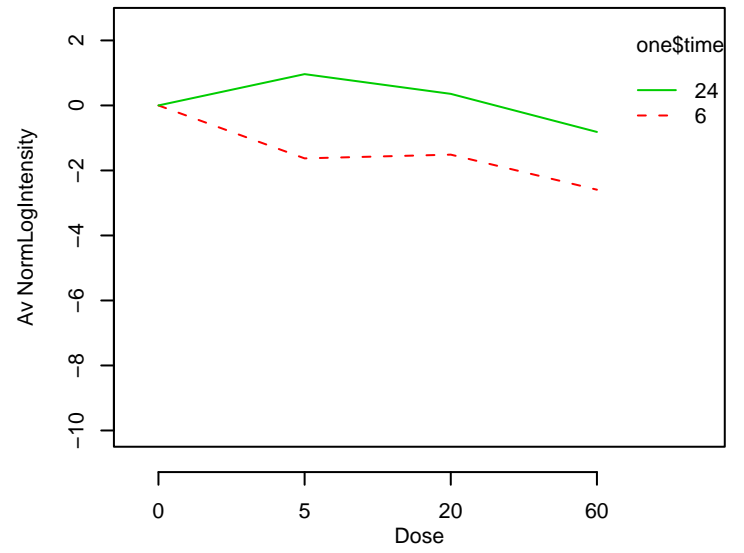

**GO\_0006740 : NADPH regeneration**

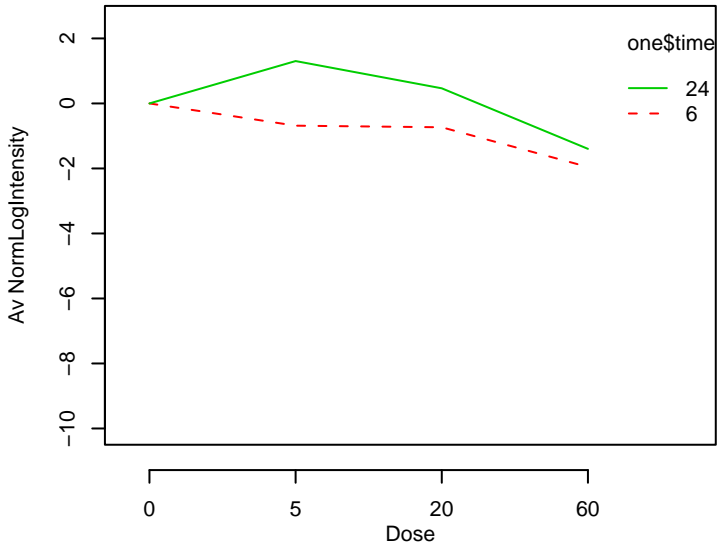

**GO\_0006743 : ubiquinone metabolism**

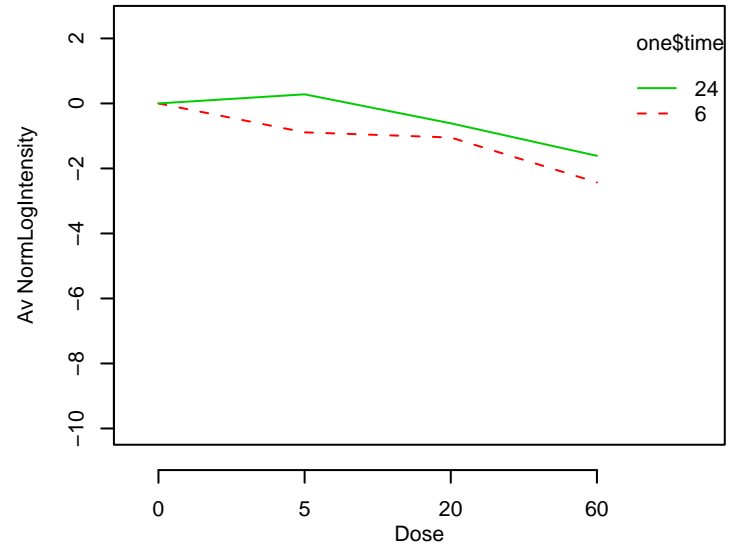

**GO\_0006744 : ubiquinone biosynthesis**

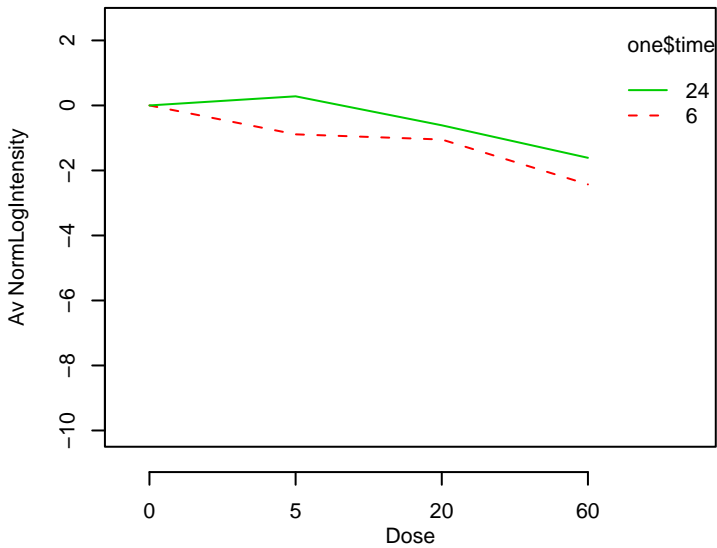

**GO\_0006749 : glutathione metabolism**

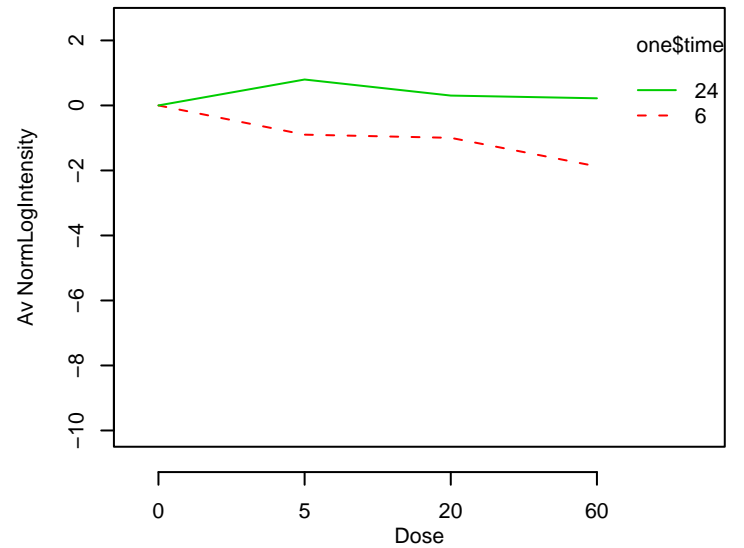

**GO\_0006750 : glutathione biosynthesis**

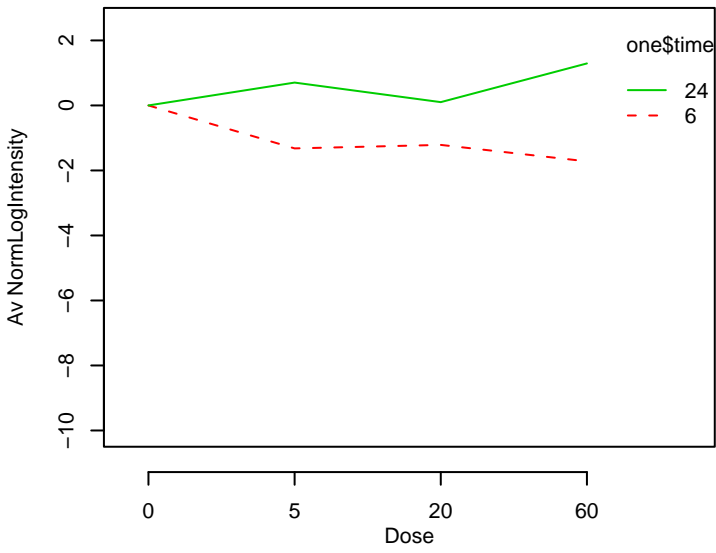

**GO\_0006752 : group transfer coenzyme metabolism**

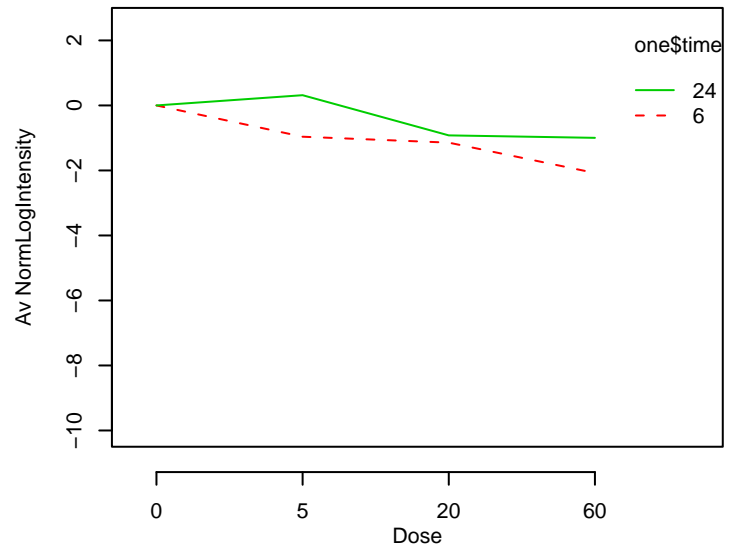

**GO\_0006753 : nucleoside phosphate metabolism**

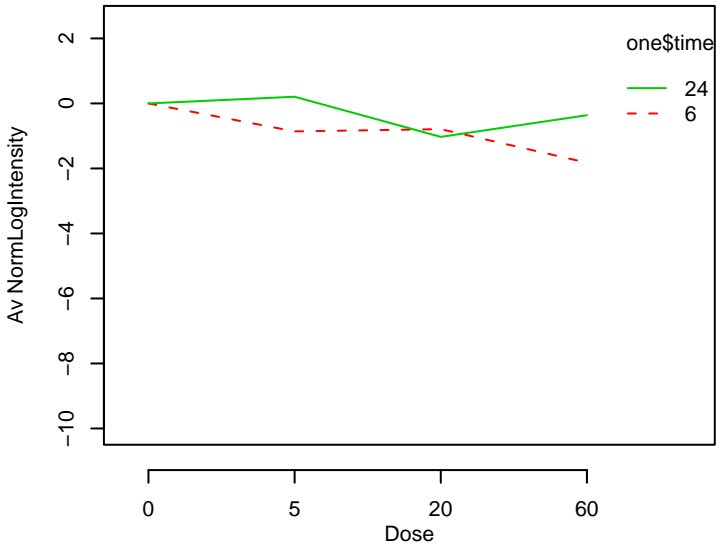

**GO\_0006754 : ATP biosynthesis**

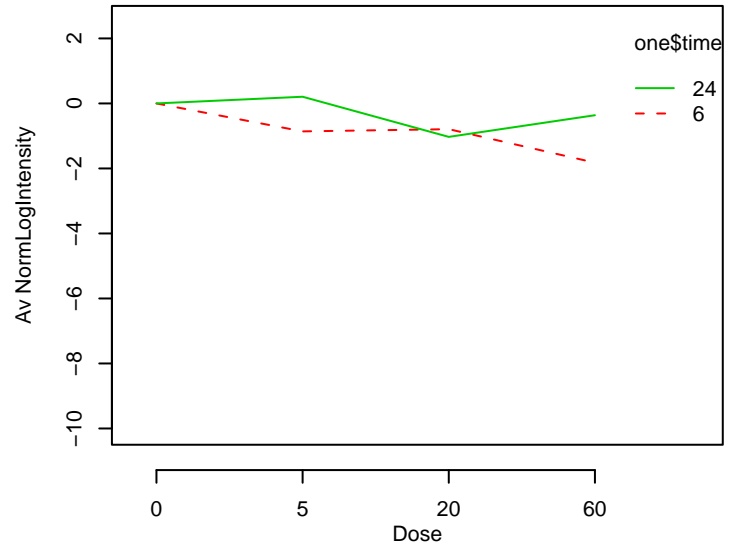

**GO\_0006760 : folic acid and derivative metabolism**

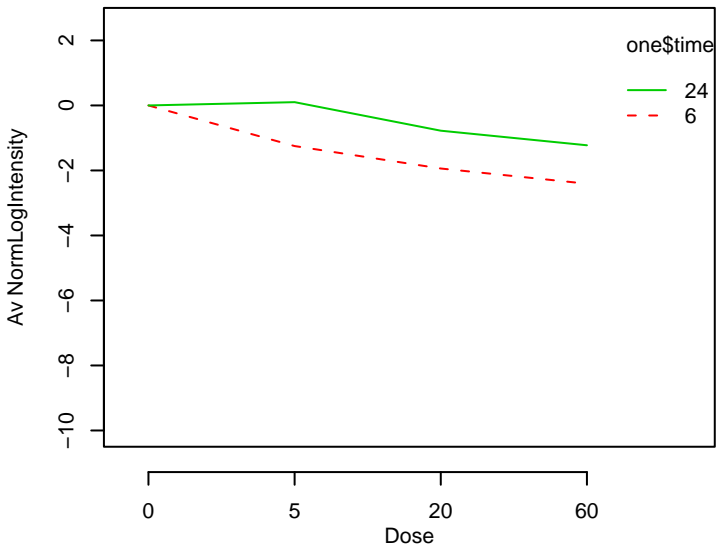

**GO\_0006766 : vitamin metabolism**

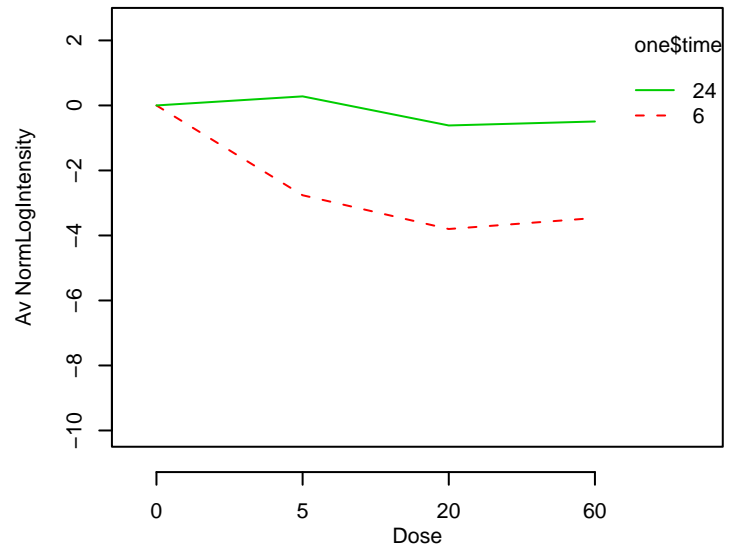

**GO\_0006767 : water-soluble vitamin metabolism**

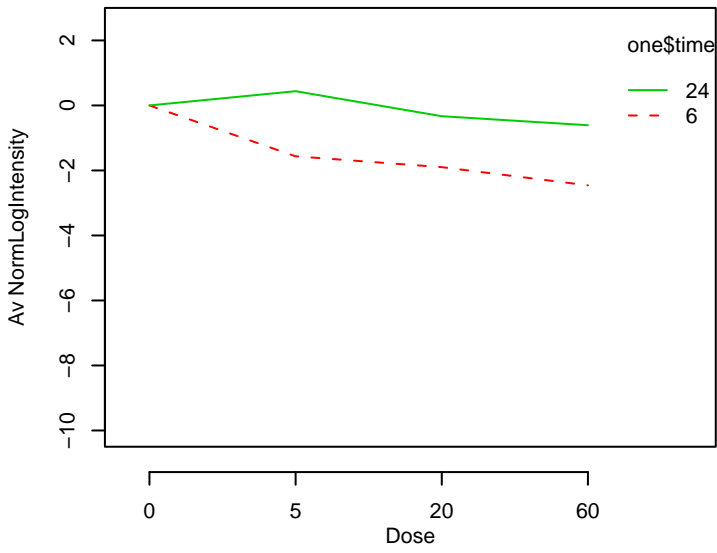

**GO\_0006769 : nicotinamide metabolism**

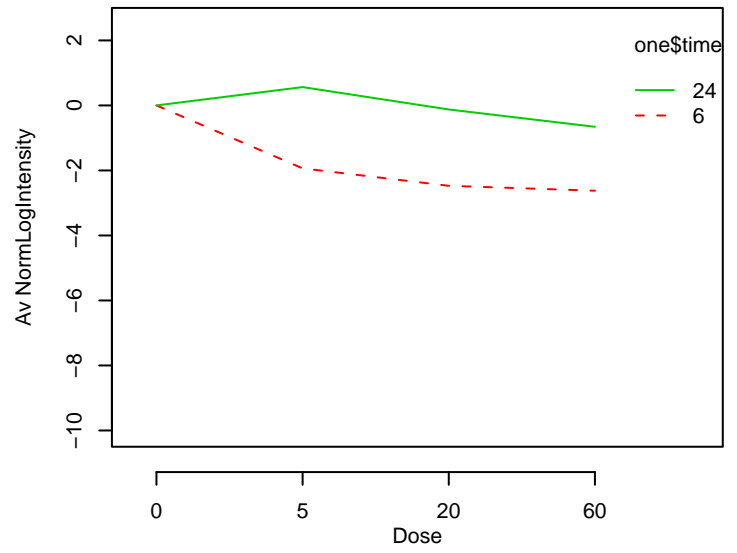

**GO\_0006775 : fat-soluble vitamin metabolism**

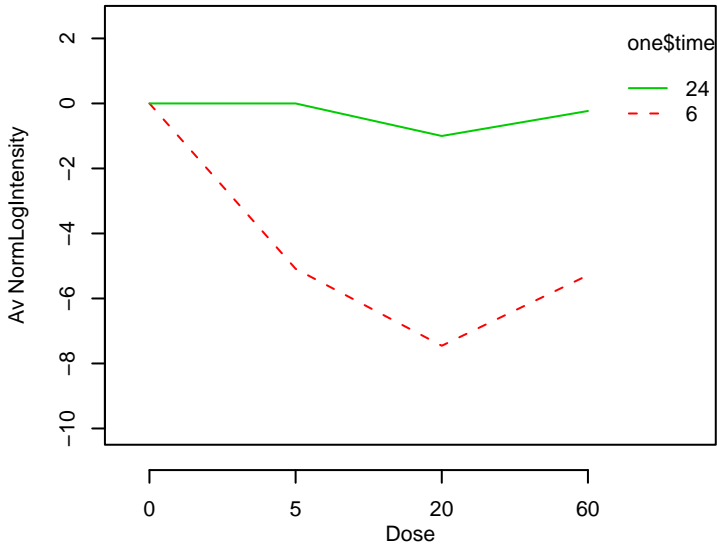

**GO\_0006776 : vitamin A metabolism**

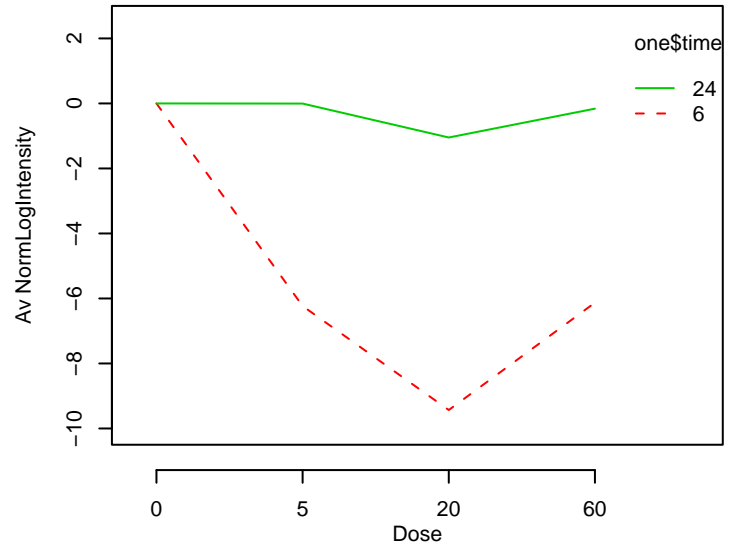

**GO\_0006777 : Mo-molybdopterin cofactor biosynthesis**

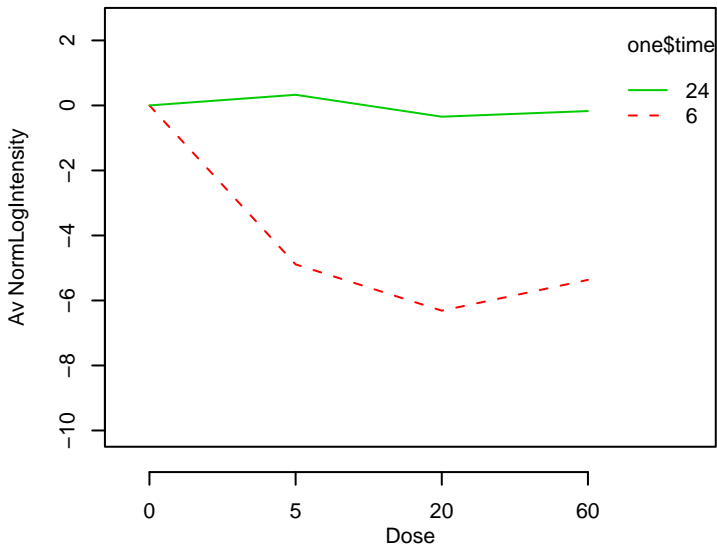

**GO\_0006778 : porphyrin metabolism**

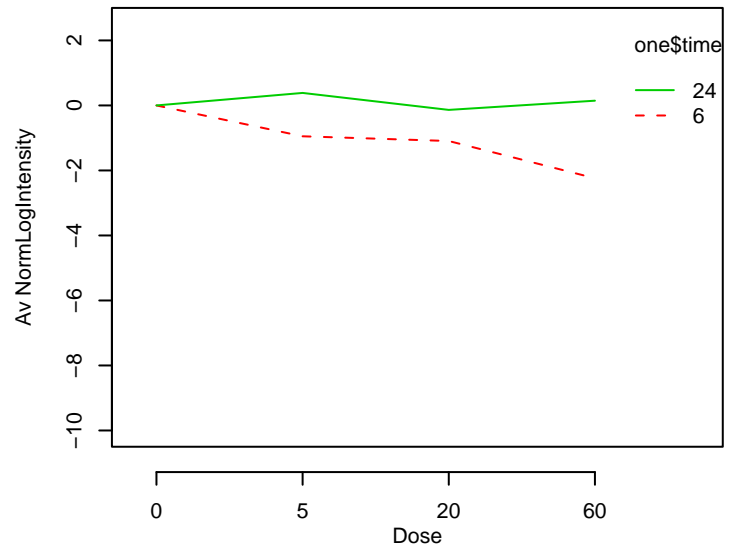

**GO\_0006779 : porphyrin biosynthesis**

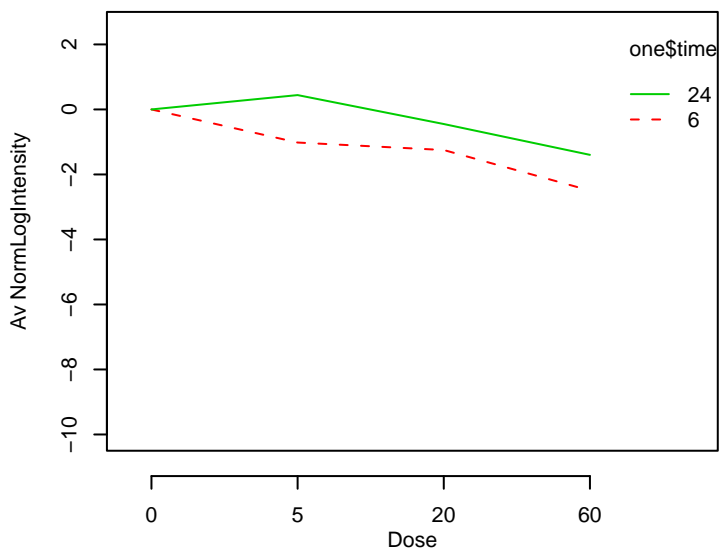

**GO\_0006783 : heme biosynthesis**

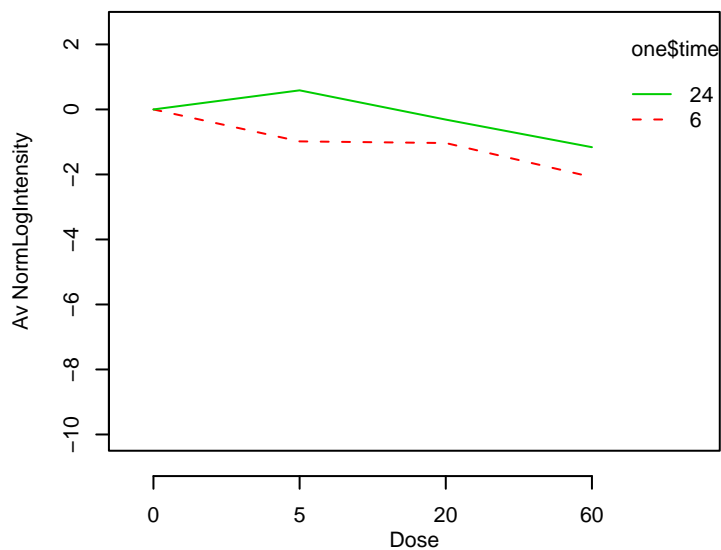

**GO\_0006787 : porphyrin catabolism**

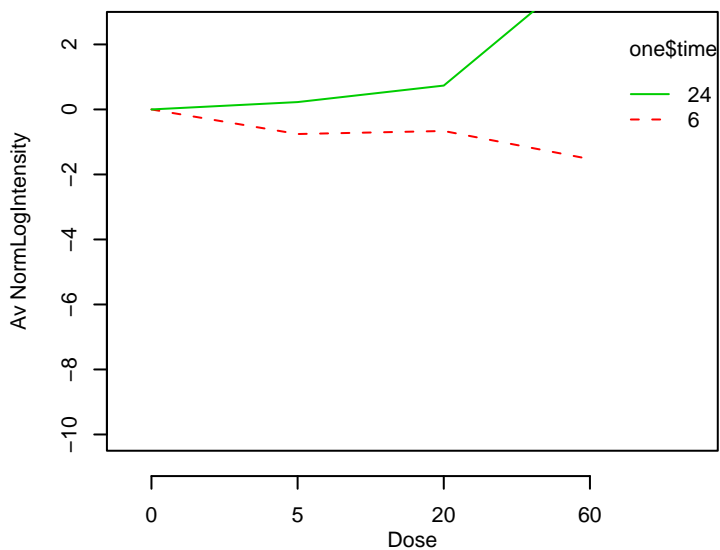

**GO\_0006790 : sulfur metabolism**

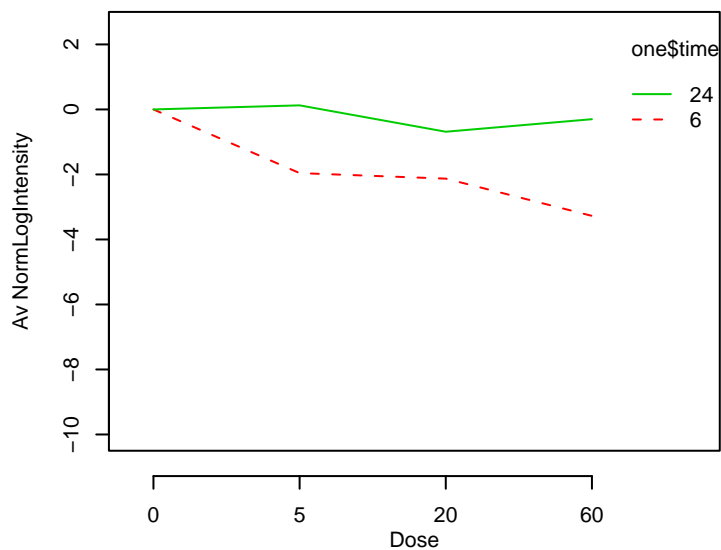

**GO\_0006800 : oxygen and reactive oxygen species metaboli**

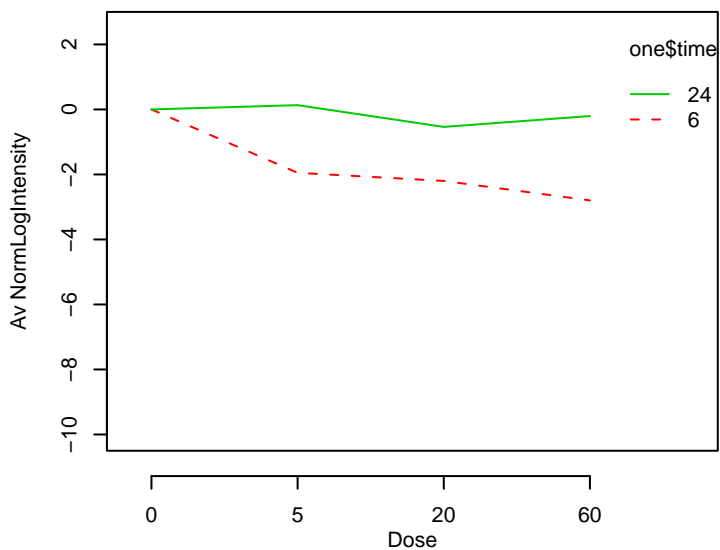

**GO\_0006801 : superoxide metabolism**

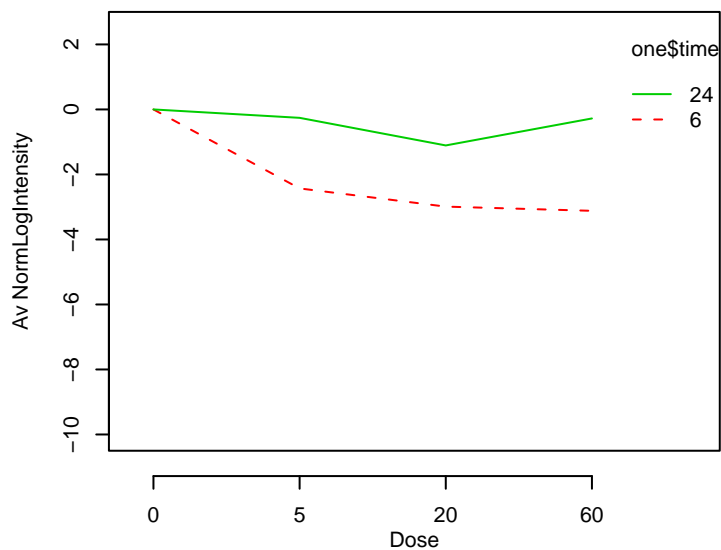



**GO\_0006805 : xenobiotic metabolism**

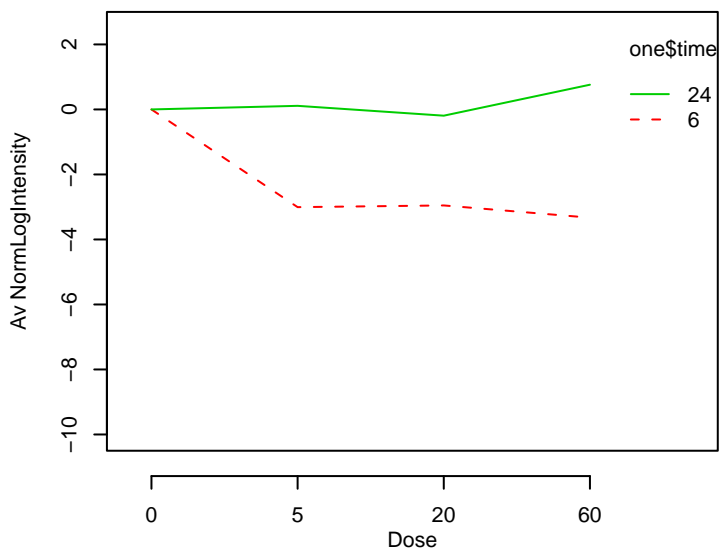

**GO\_0006809 : nitric oxide biosynthesis**

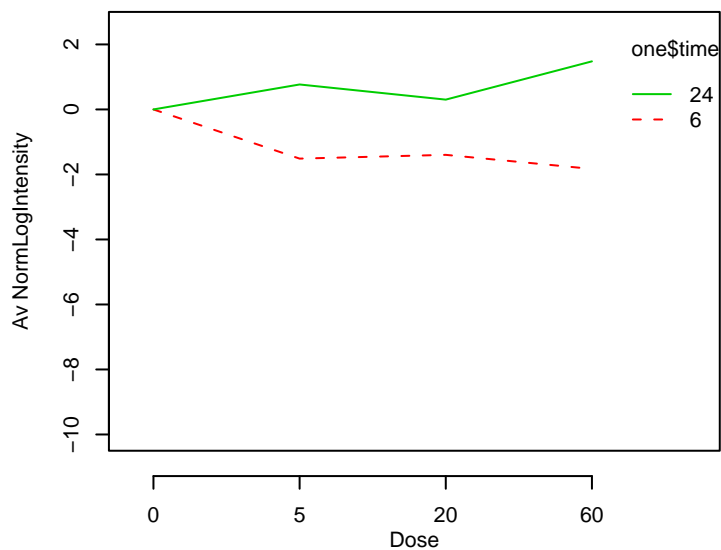

**GO\_0006813 : potassium ion transport**

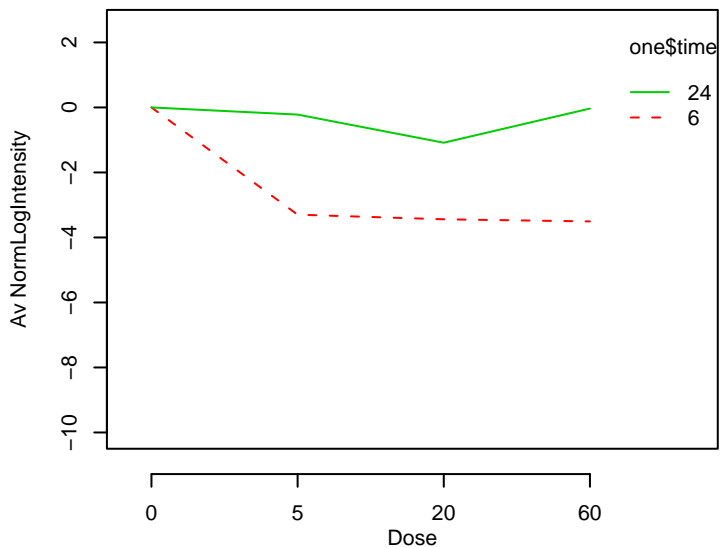

**GO\_0006814 : sodium ion transport**

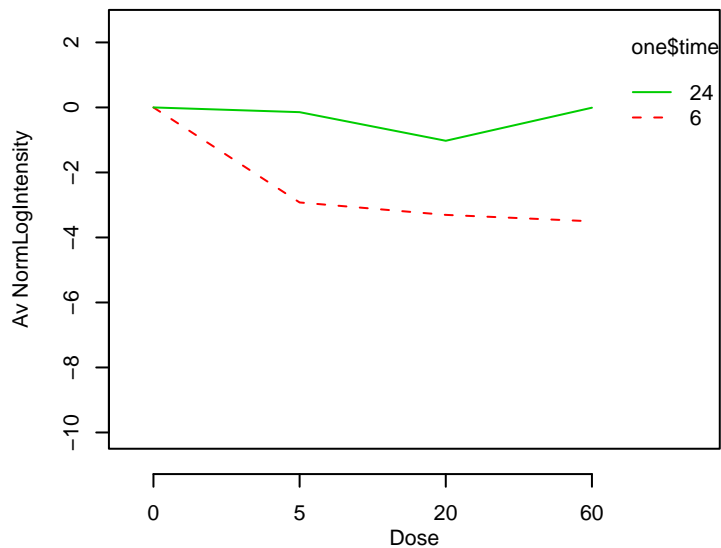

**GO\_0006816 : calcium ion transport**

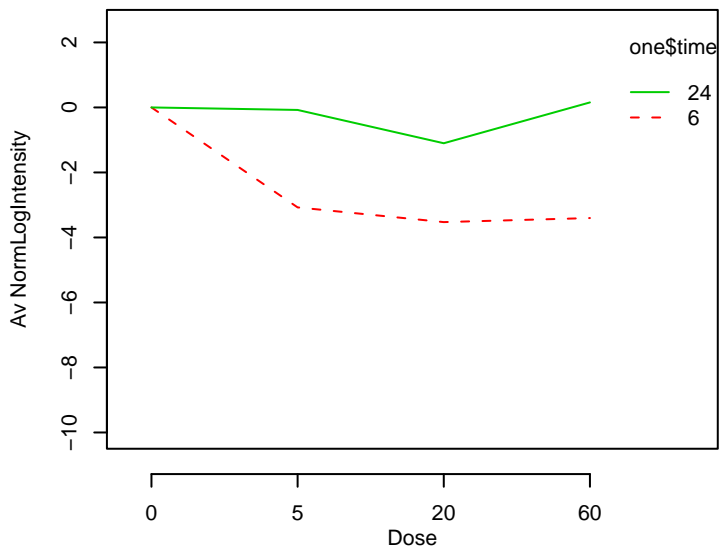

**GO\_0006817 : phosphate transport**

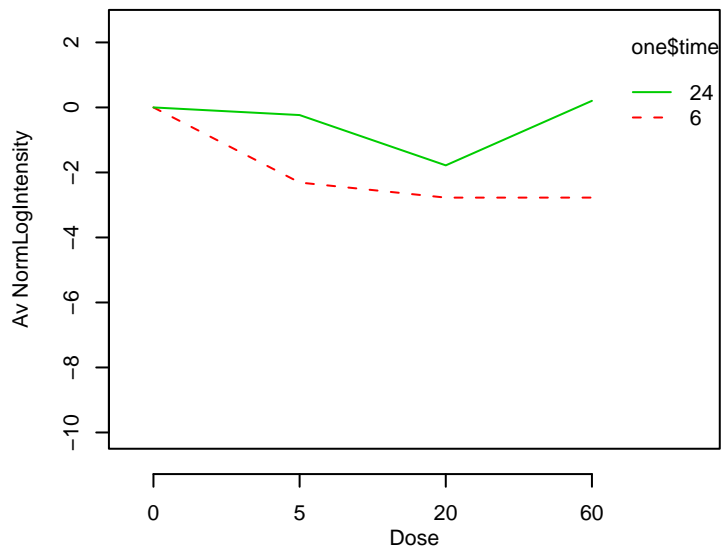

**GO\_0006818 : hydrogen transport**

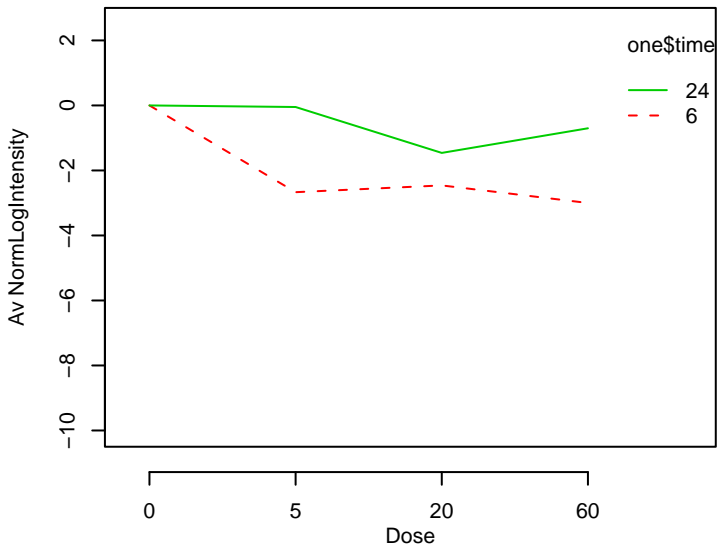

**GO\_0006820 : anion transport**

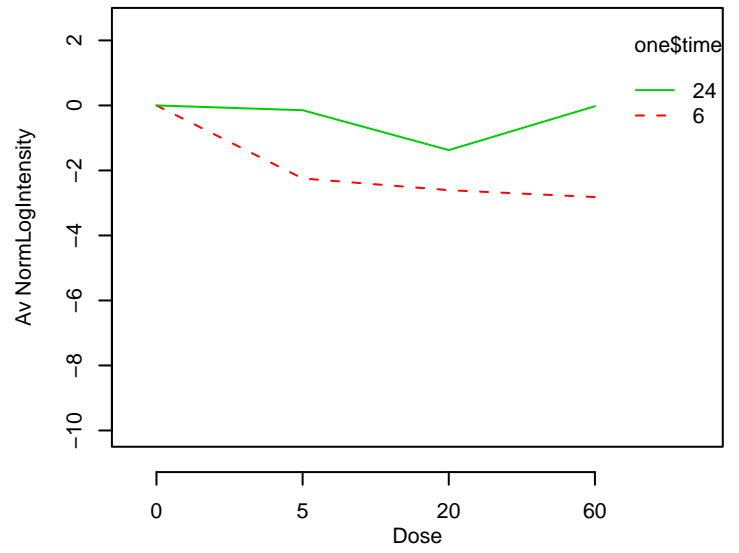

**GO\_0006821 : chloride transport**

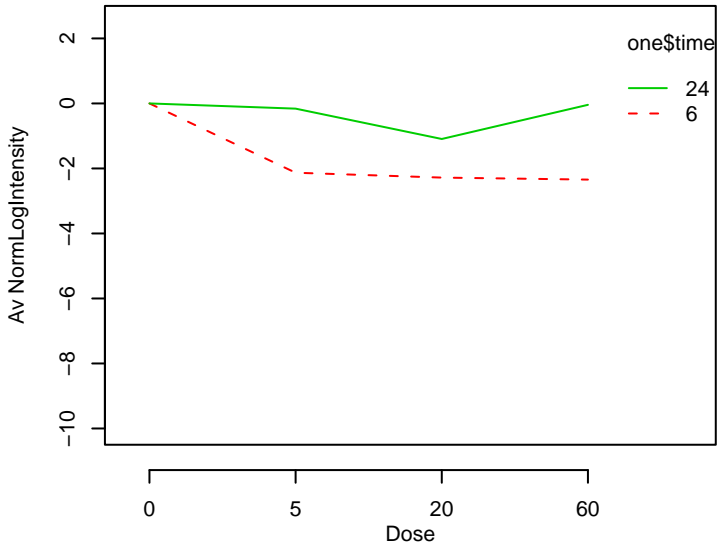

**GO\_0006825 : copper ion transport**

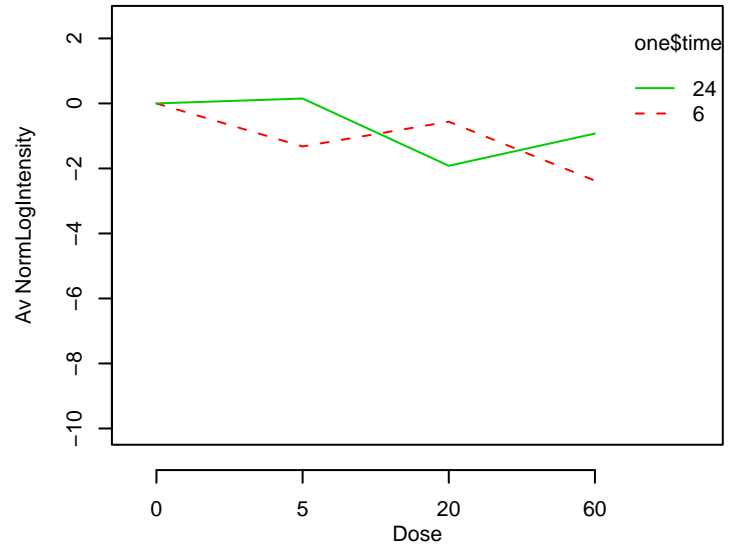

**GO\_0006826 : iron ion transport**

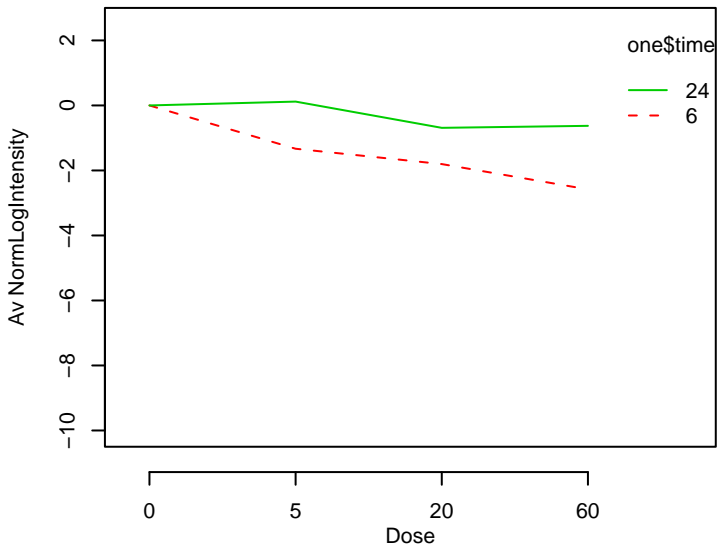

**GO\_0006829 : zinc ion transport**

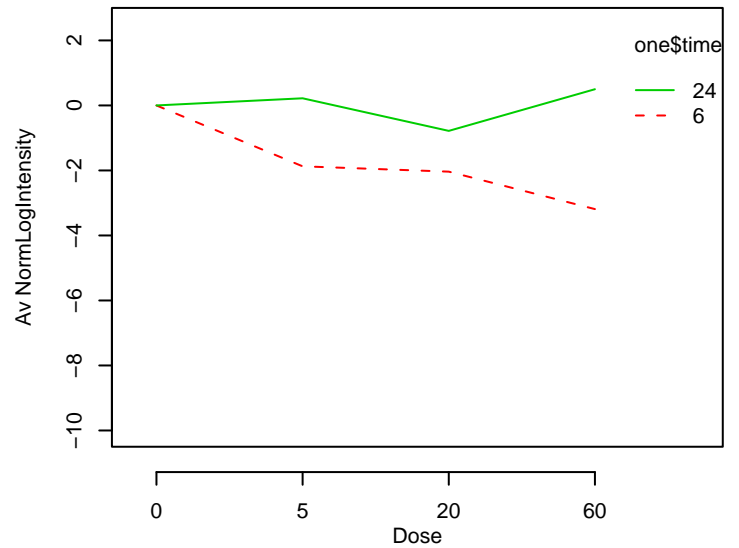

**GO\_0006833 : water transport**

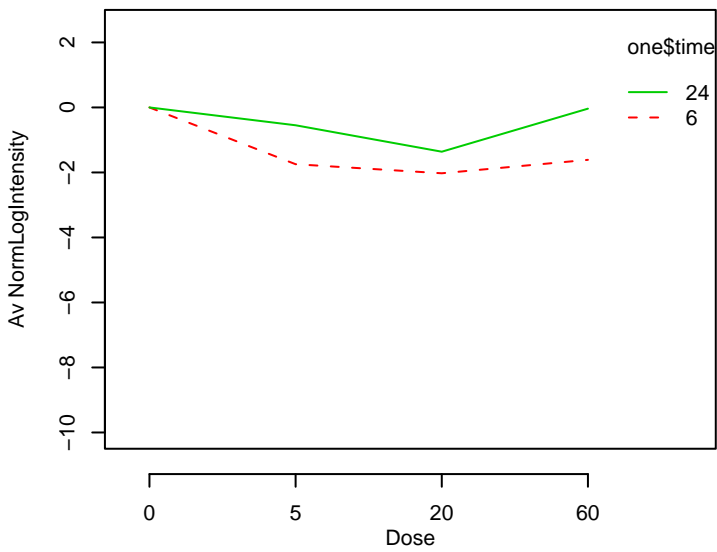

**GO\_0006835 : dicarboxylic acid transport**

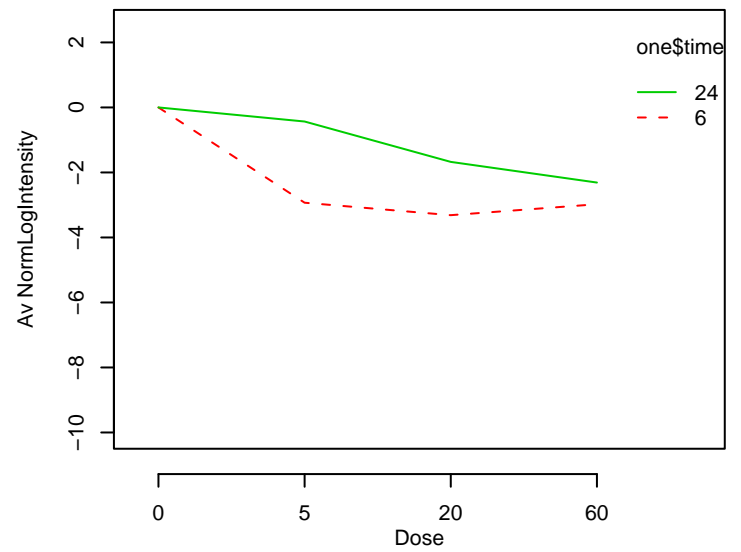

**GO\_0006836 : neurotransmitter transport**

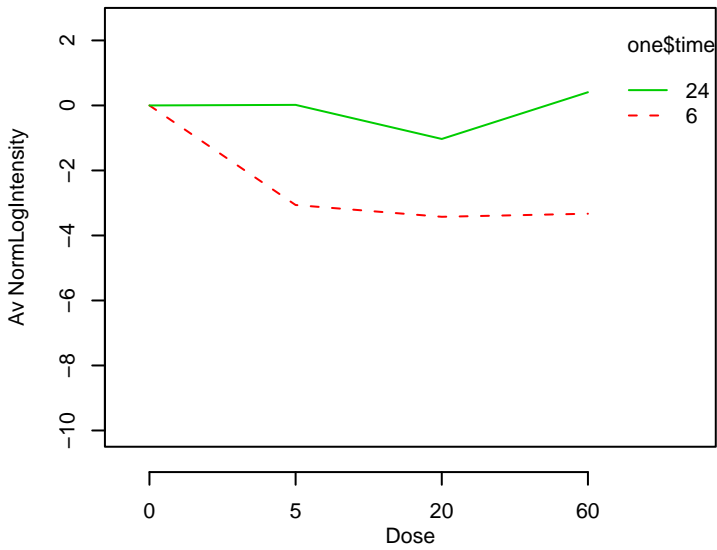

**GO\_0006839 : mitochondrial transport**

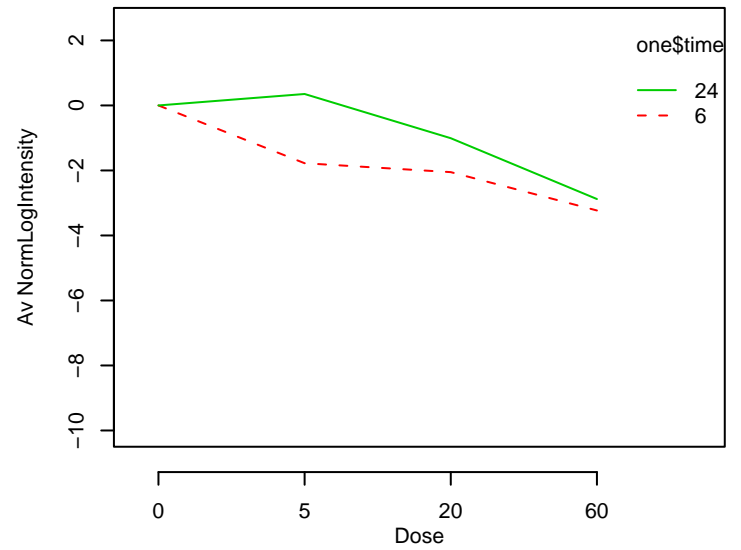

**GO\_0006857 : oligopeptide transport**

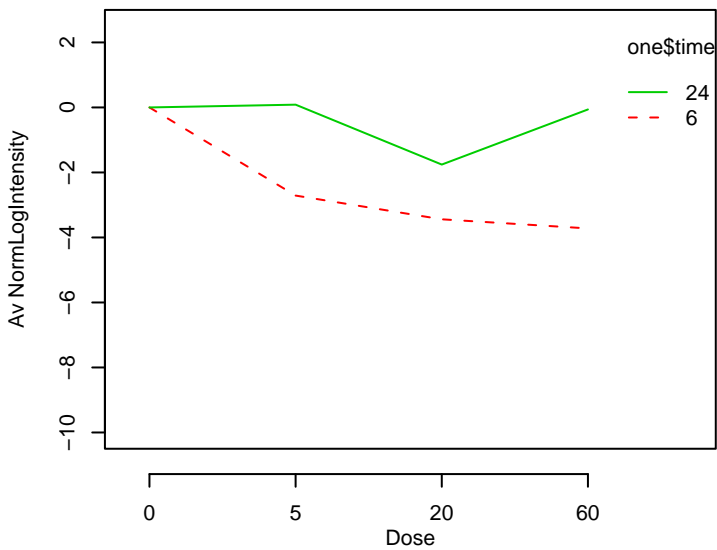

**GO\_0006865 : amino acid transport**

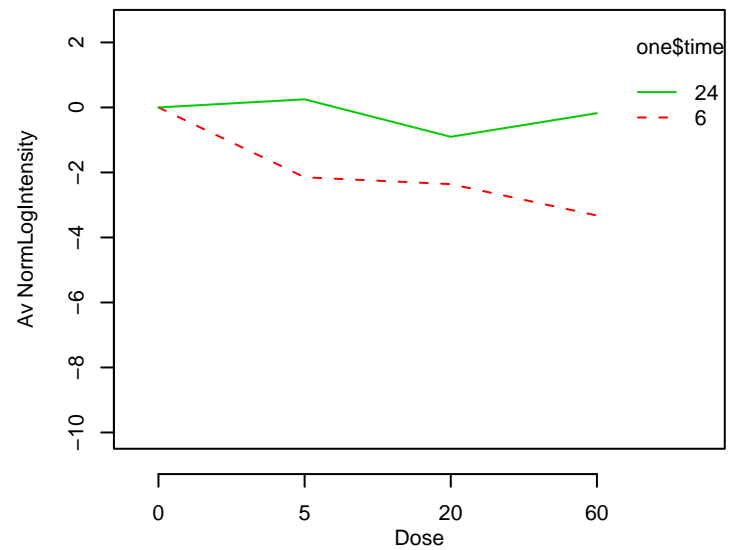

**GO\_0006869 : lipid transport**

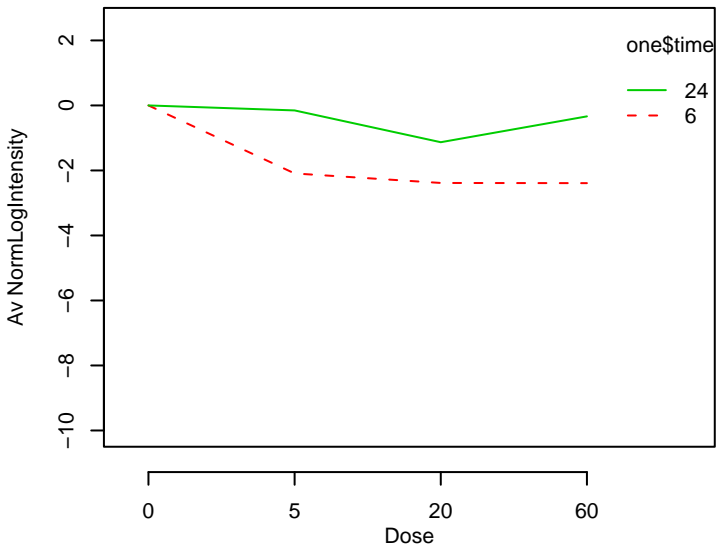

**GO\_0006873 : cell ion homeostasis**

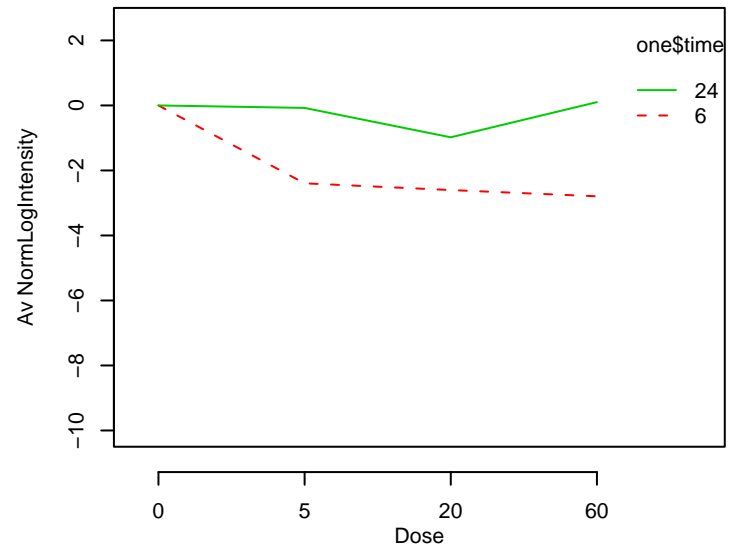

**GO\_0006874 : calcium ion homeostasis**

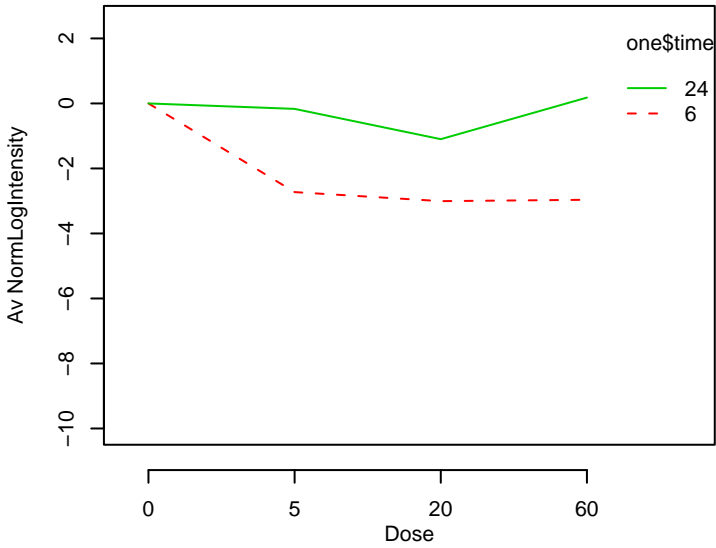

**GO\_0006875 : metal ion homeostasis**

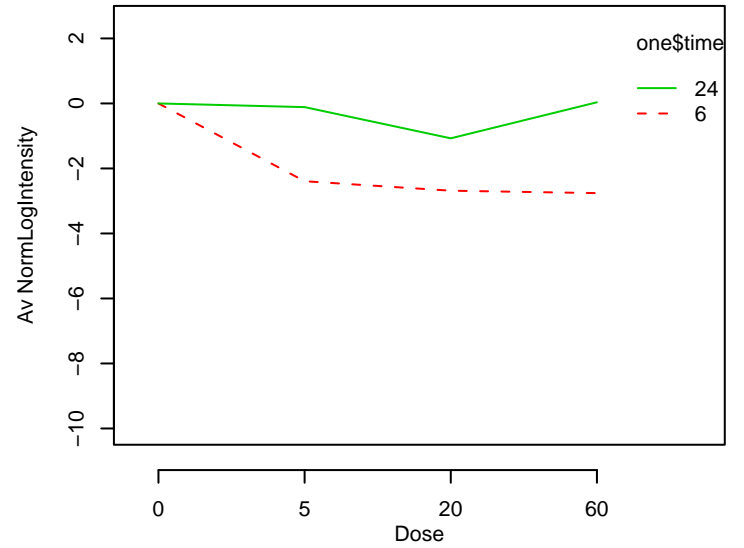

**GO\_0006878 : copper ion homeostasis**

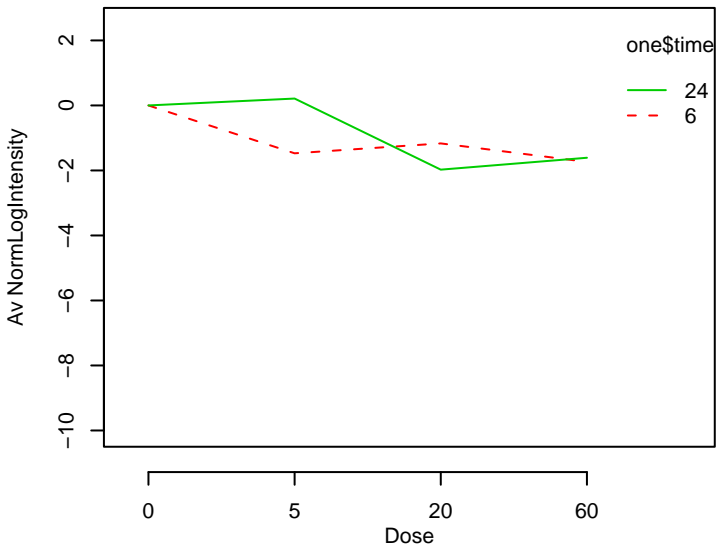

**GO\_0006879 : iron ion homeostasis**

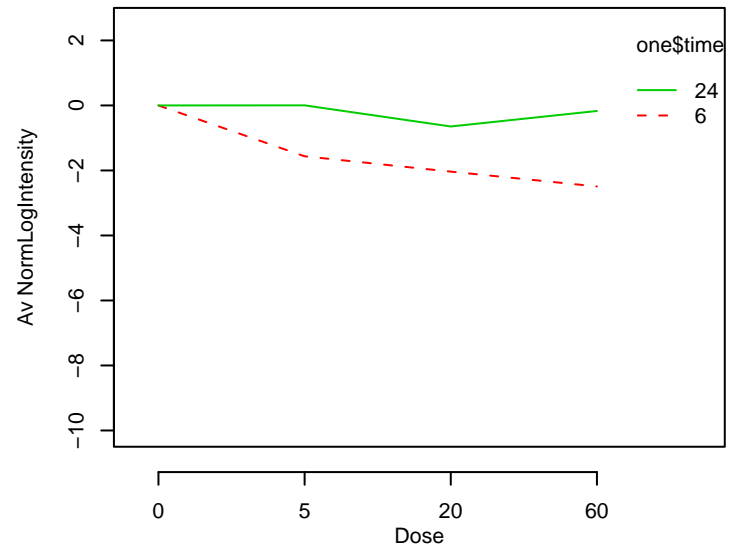

**GO\_0006882 : zinc ion homeostasis**

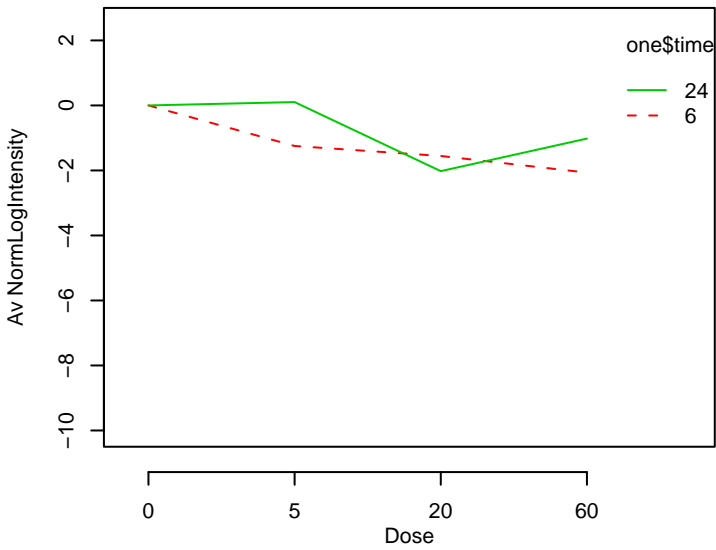

**GO\_0006884 : regulation of cell volume**

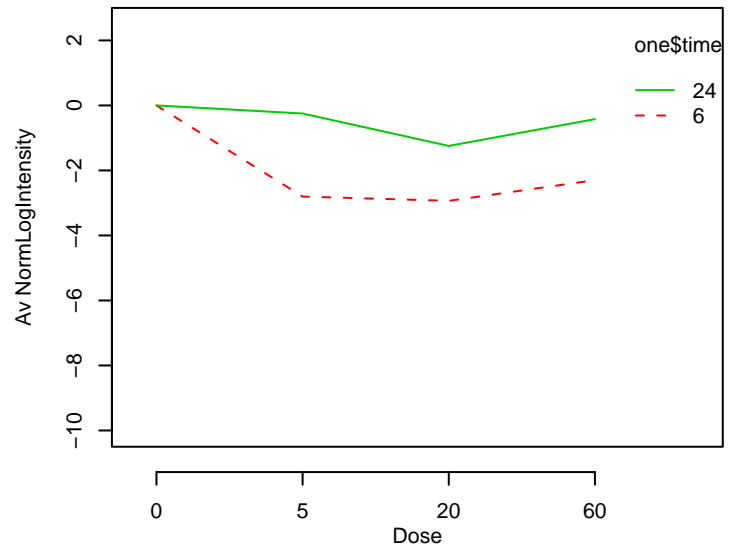

**GO\_0006885 : regulation of pH**

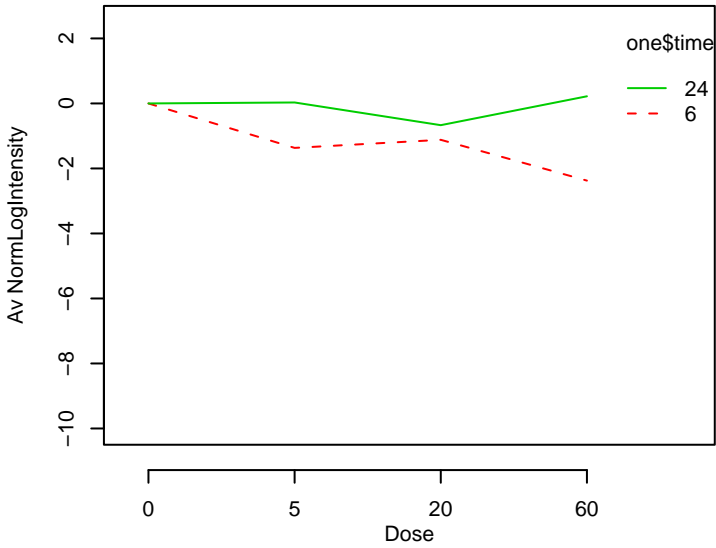

**GO\_0006887 : exocytosis**

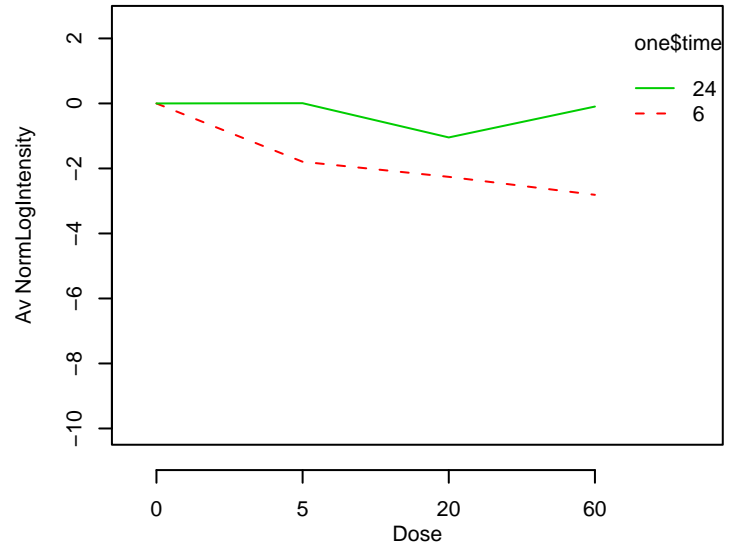

**GO\_0006888 : ER to Golgi vesicle-mediated transport** **GO\_0006890 : retrograde vesicle-mediated transport, Golgi**

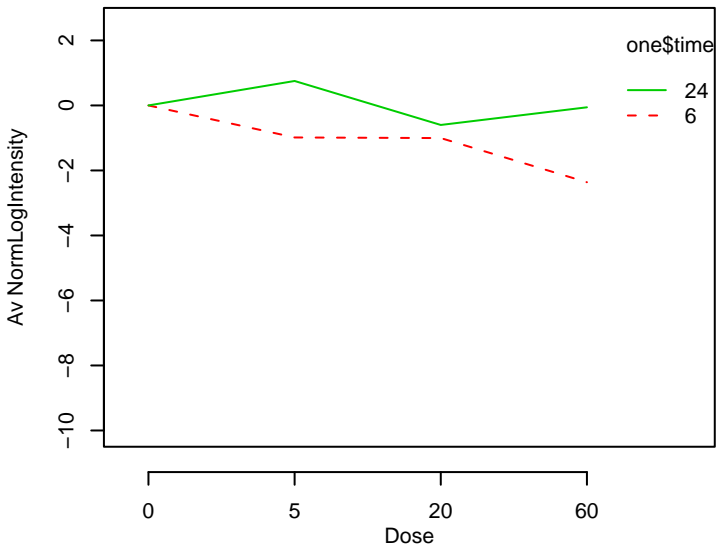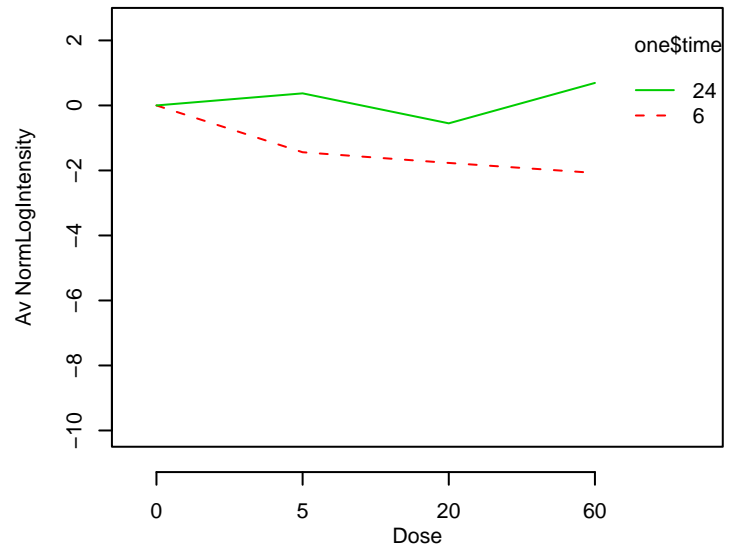

**GO\_0006891 : intra-Golgi vesicle-mediated transport**

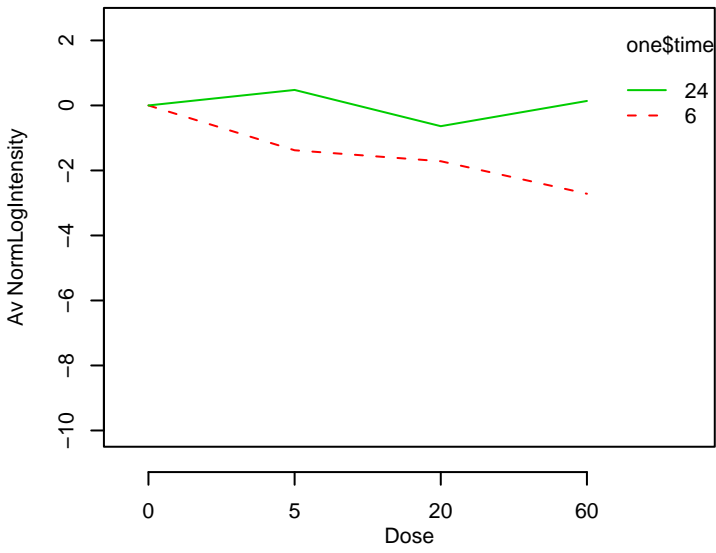

**GO\_0006892 : post-Golgi vesicle-mediated transport**

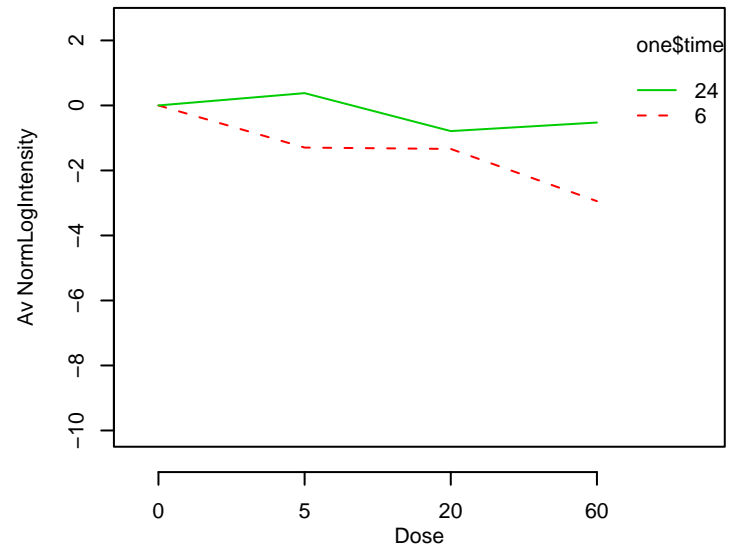

**GO\_0006895 : Golgi to endosome transport**

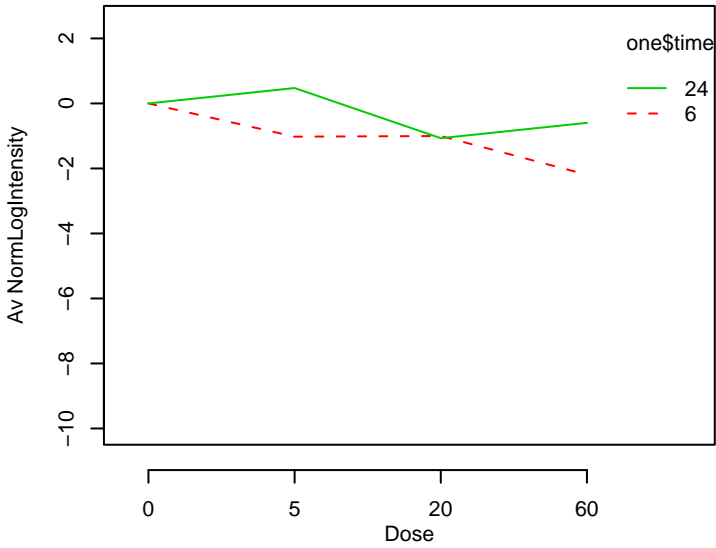

**GO\_0006897 : endocytosis**

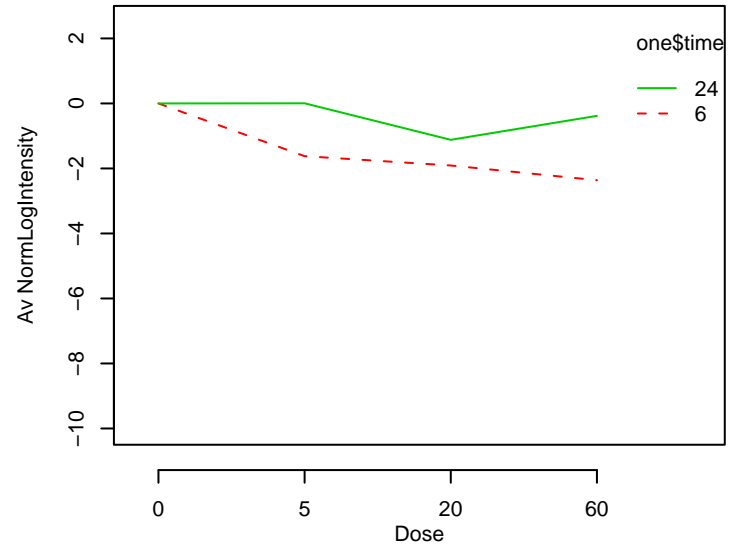

**GO\_0006898 : receptor-mediated endocytosis**

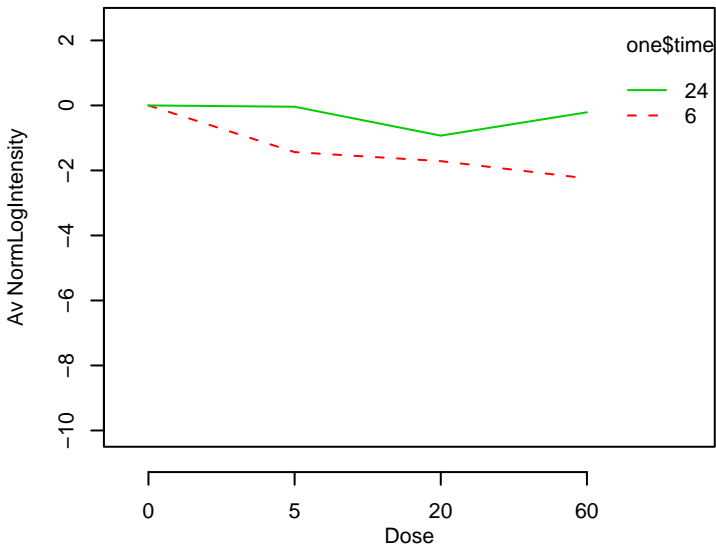

**GO\_0006903 : vesicle targeting**

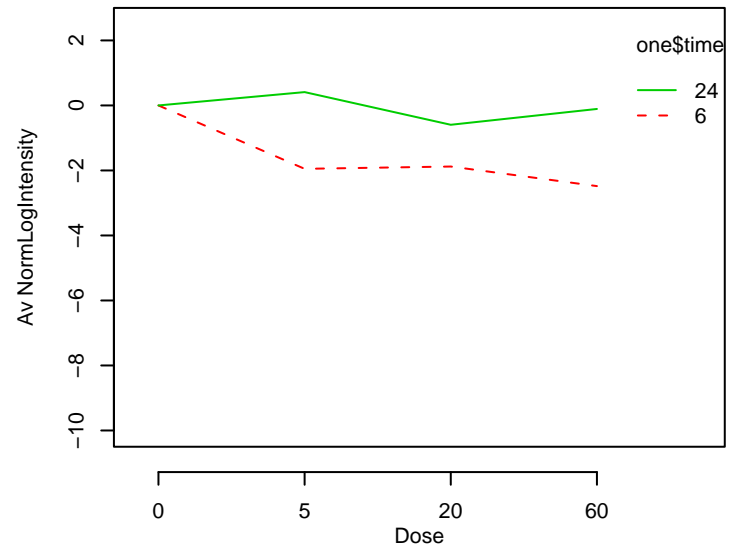

**GO\_0006904 : vesicle docking during exocytosis**

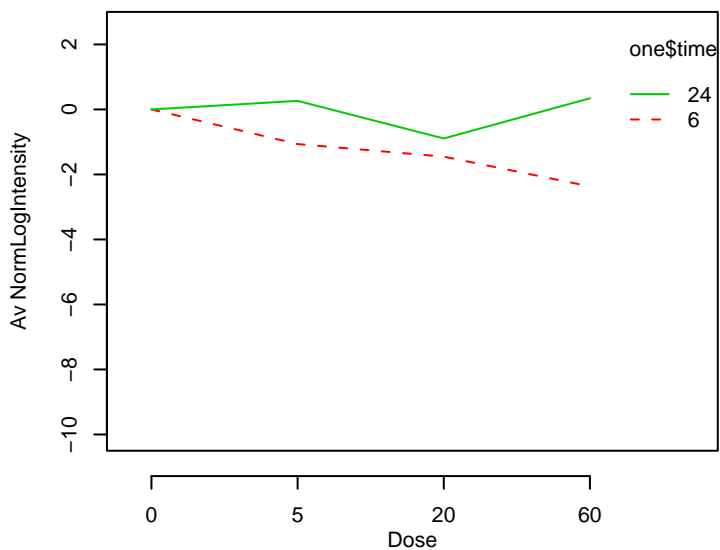

**GO\_0006906 : vesicle fusion**

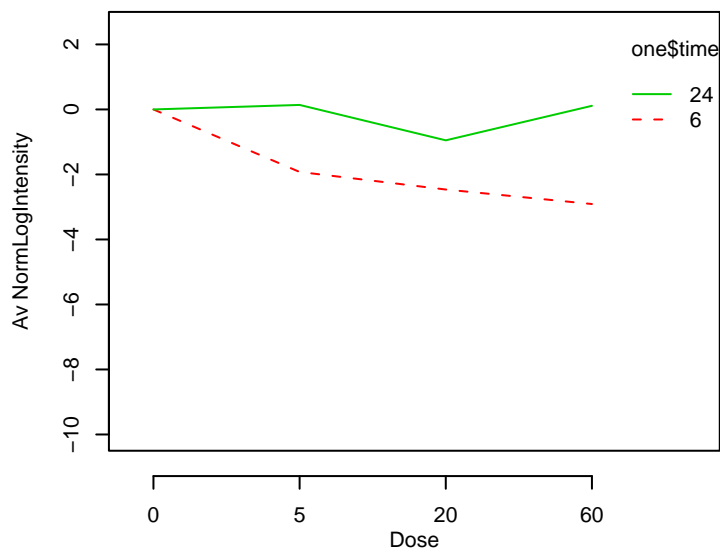

**GO\_0006909 : phagocytosis**

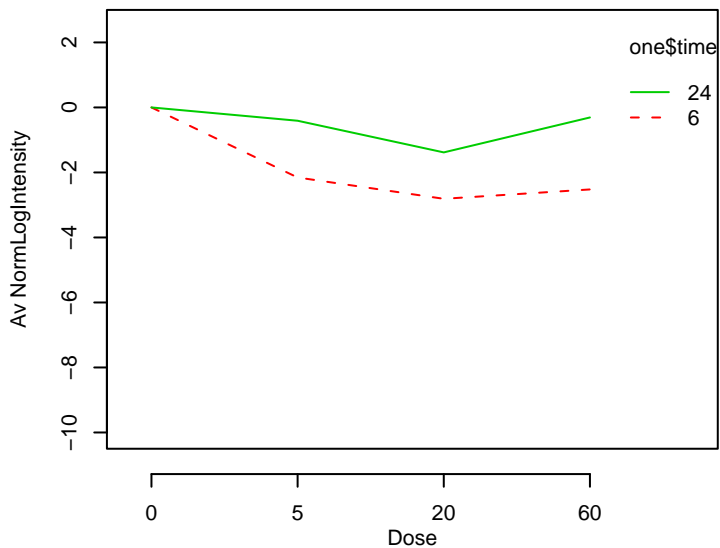

**GO\_0006911 : phagocytosis, engulfment**

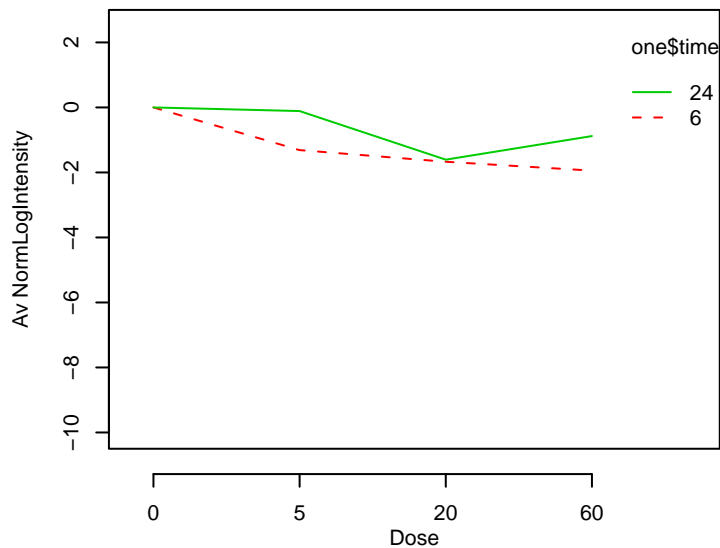

**GO\_0006913 : nucleocytoplasmic transport**

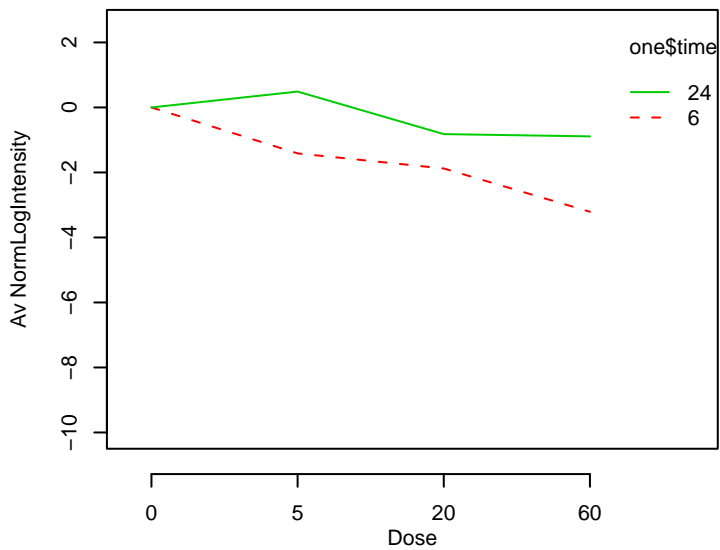

**GO\_0006914 : autophagy**

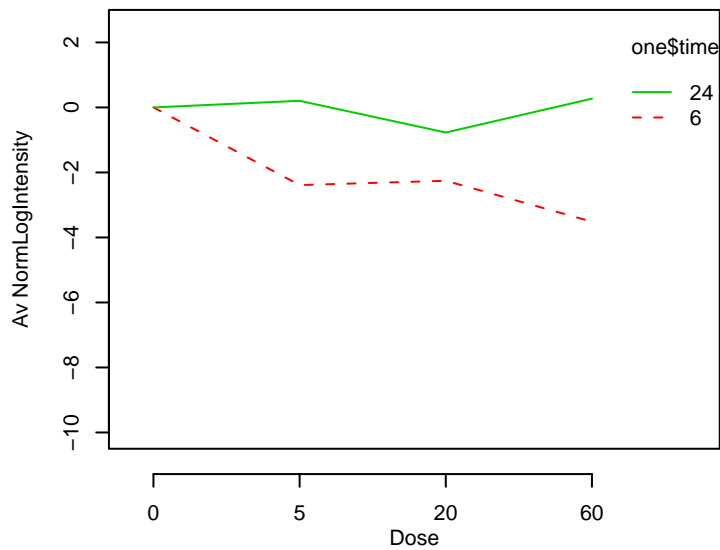

**GO\_0006916 : anti-apoptosis**

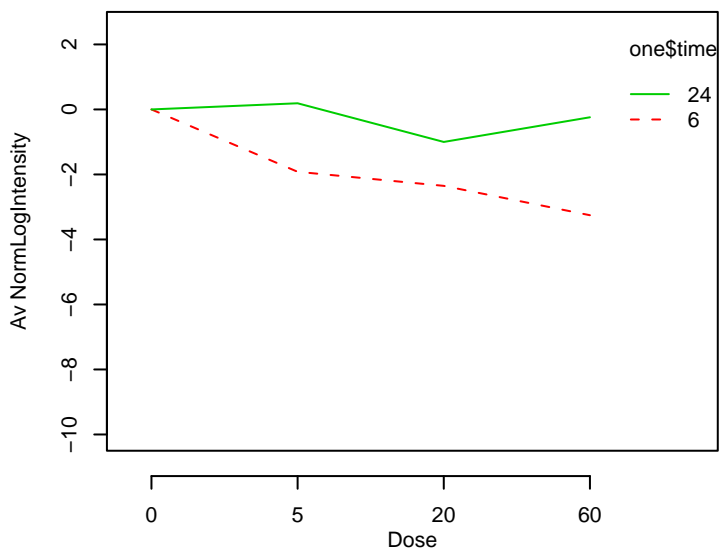

**GO\_0006917 : induction of apoptosis**

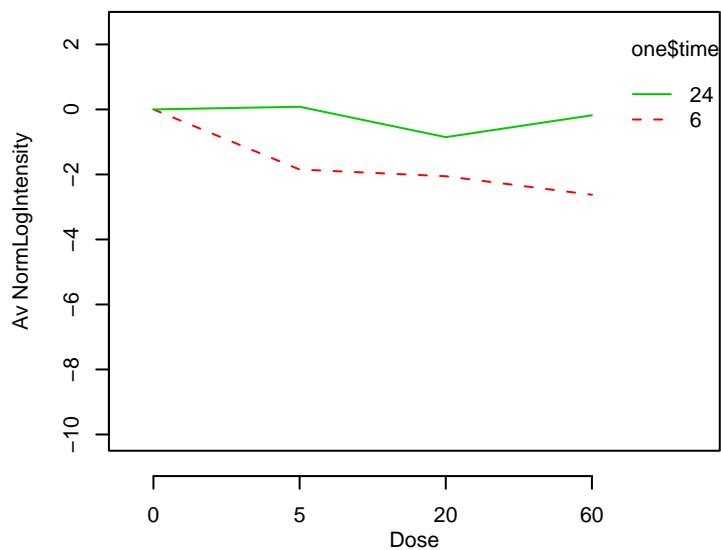

**GO\_0006919 : caspase activation**

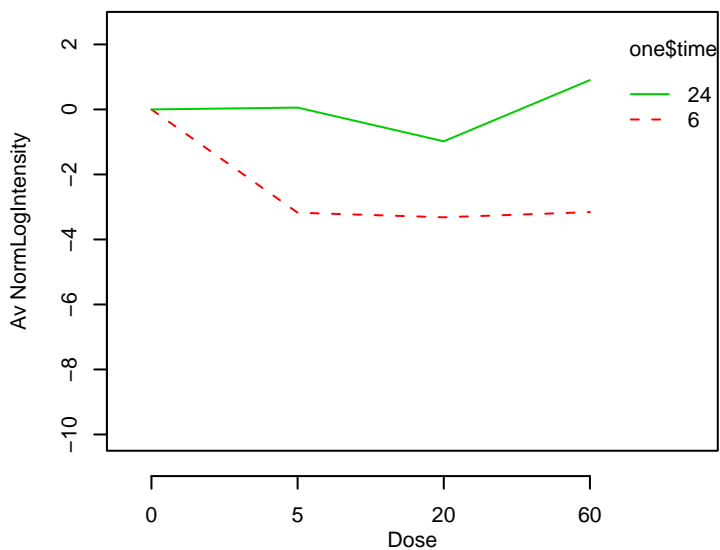

**GO\_0006921 : disassembly of cell structures during apopto**

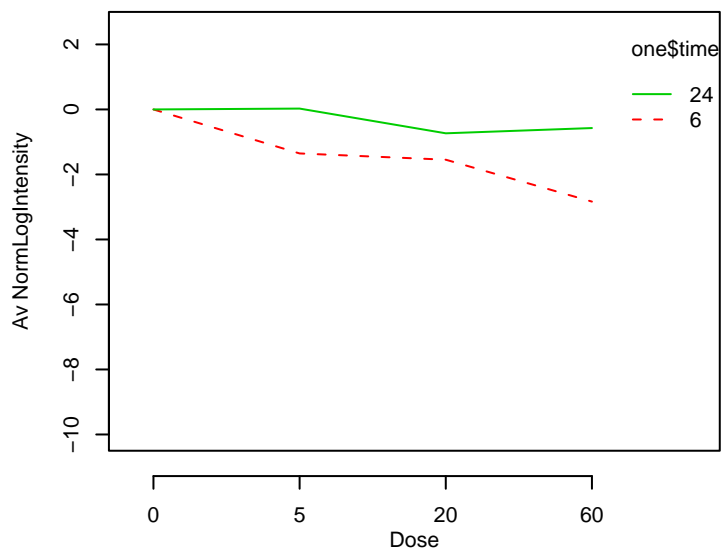

**GO\_0006929 : substrate-bound cell migration**

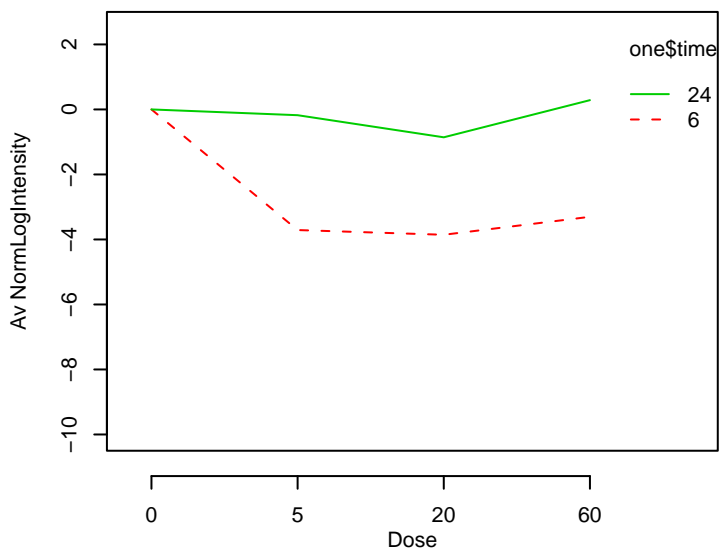

**GO\_0006935 : chemotaxis**

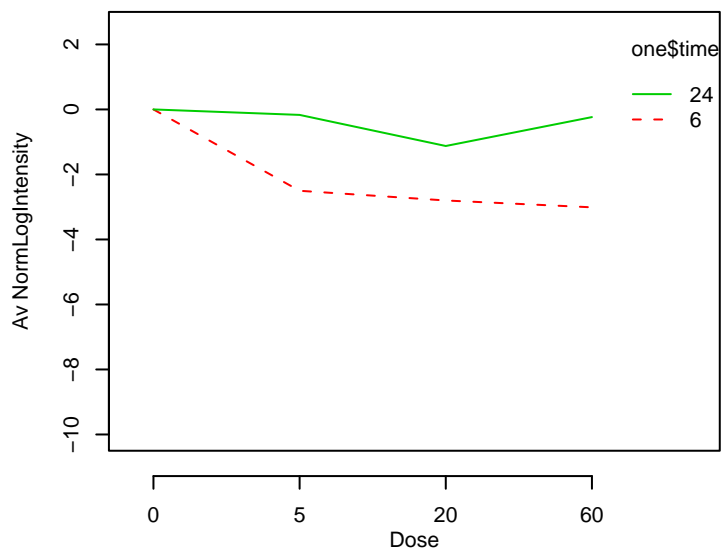



**GO\_0006936 : muscle contraction**

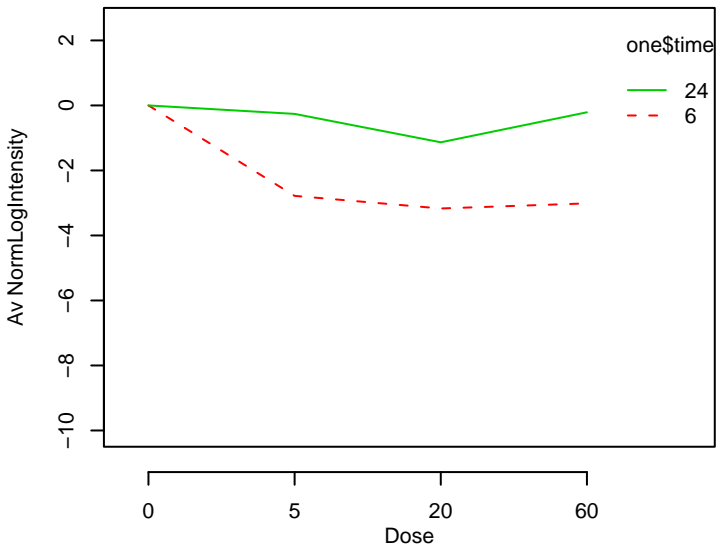

**GO\_0006937 : regulation of muscle contraction**

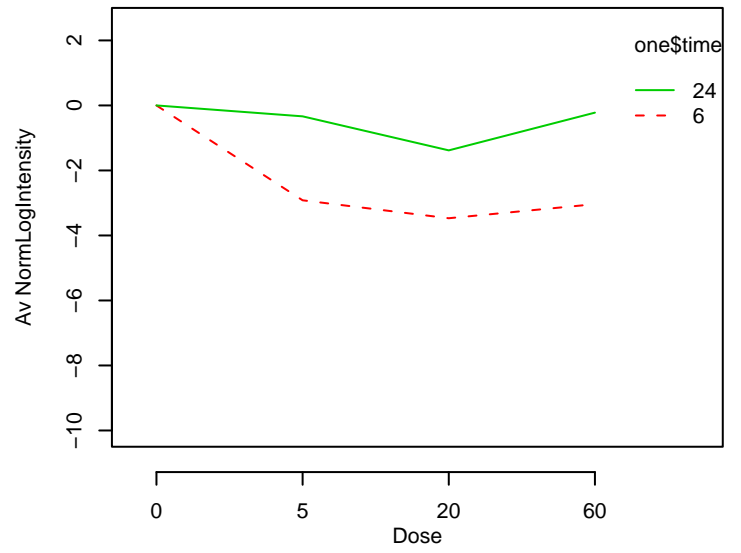

**GO\_0006939 : smooth muscle contraction**

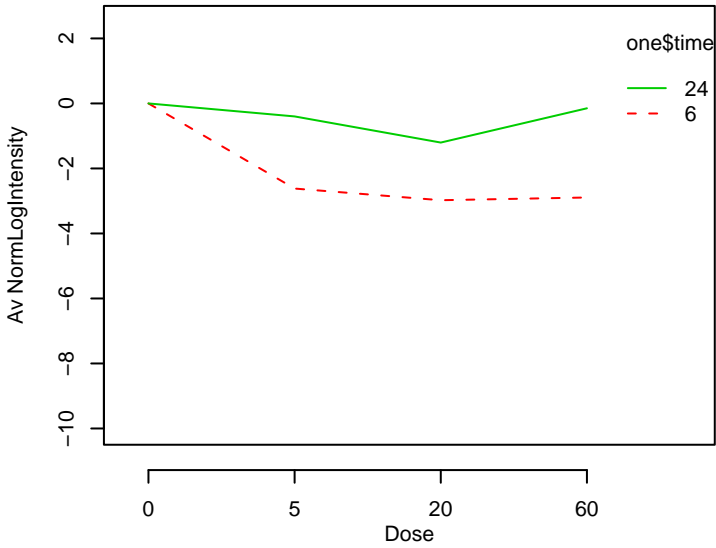

**GO\_0006940 : regulation of smooth muscle contraction**

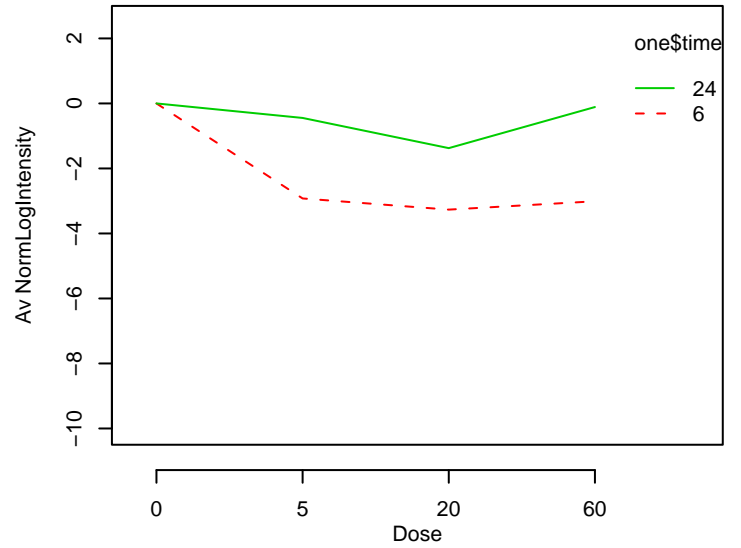

**GO\_0006941 : striated muscle contraction**

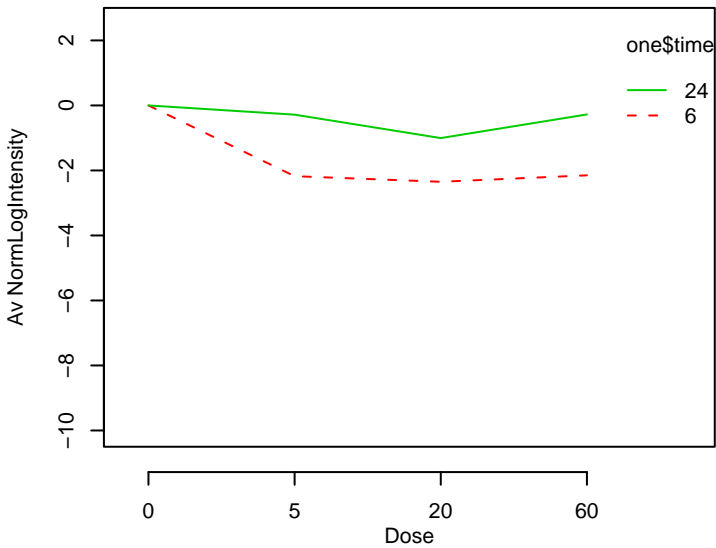

**GO\_0006942 : regulation of striated muscle contraction**

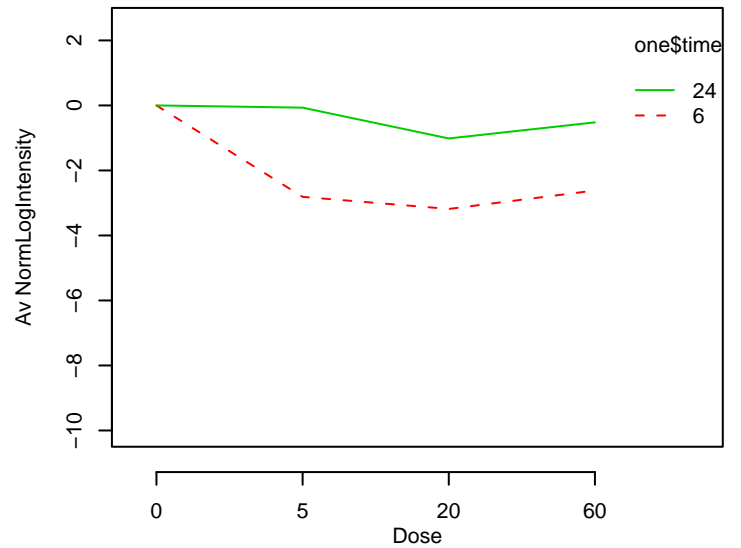

**GO\_0006944 : membrane fusion**

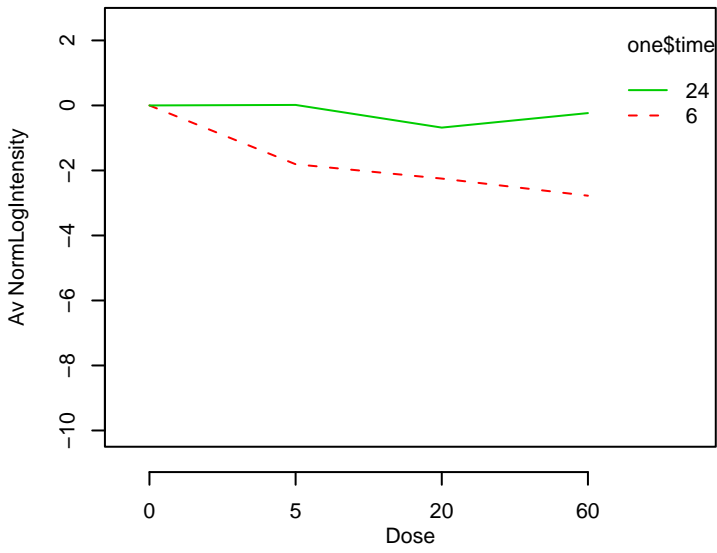

**GO\_0006953 : acute-phase response**

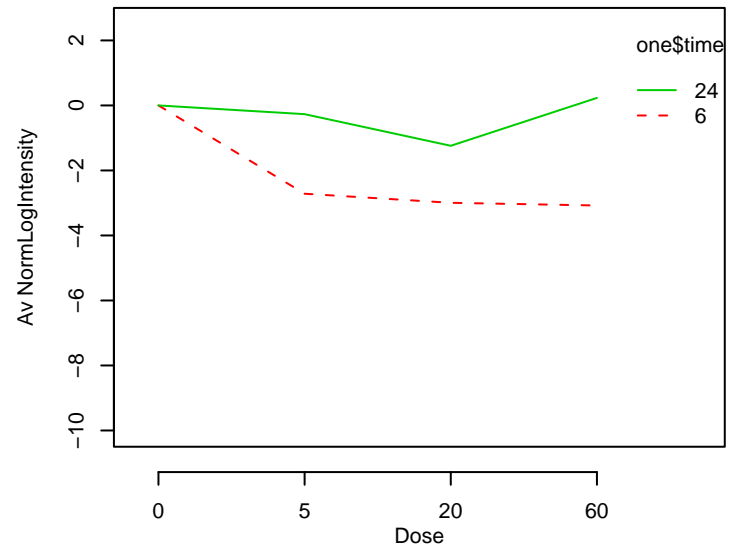

**GO\_0006954 : inflammatory response**

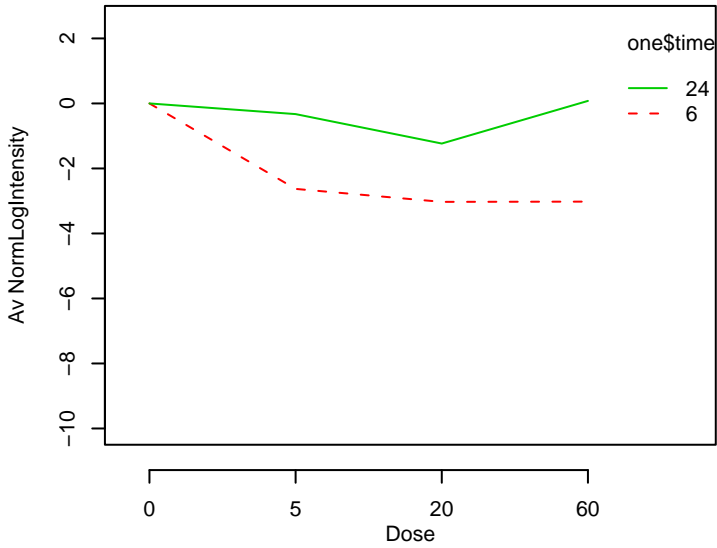

**GO\_0006956 : complement activation**

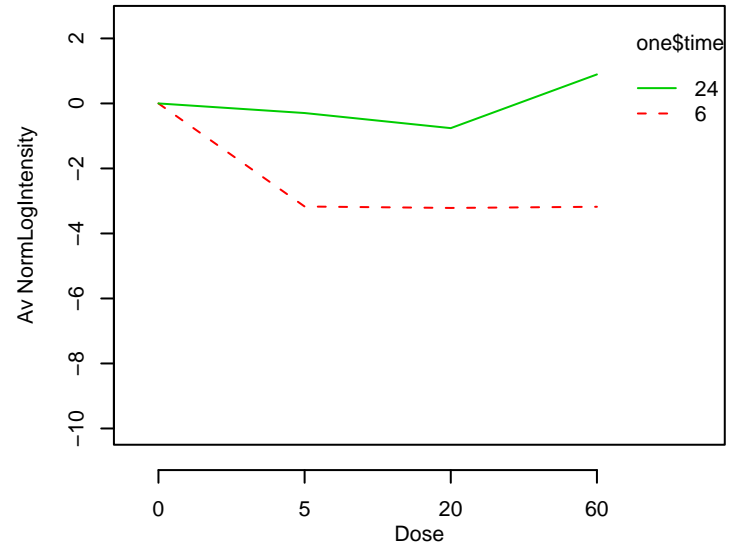

**GO\_0006957 : complement activation, alternative pathway**

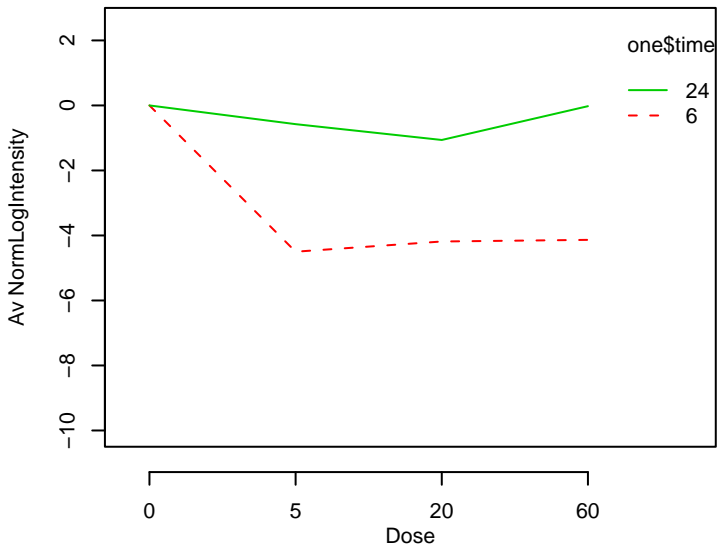

**GO\_0006958 : complement activation, classical pathway**

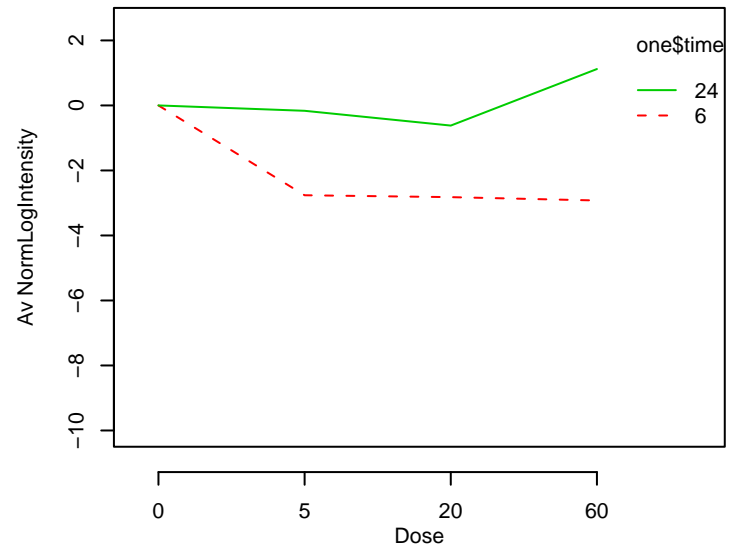

**GO\_0006959 : humoral immune response**

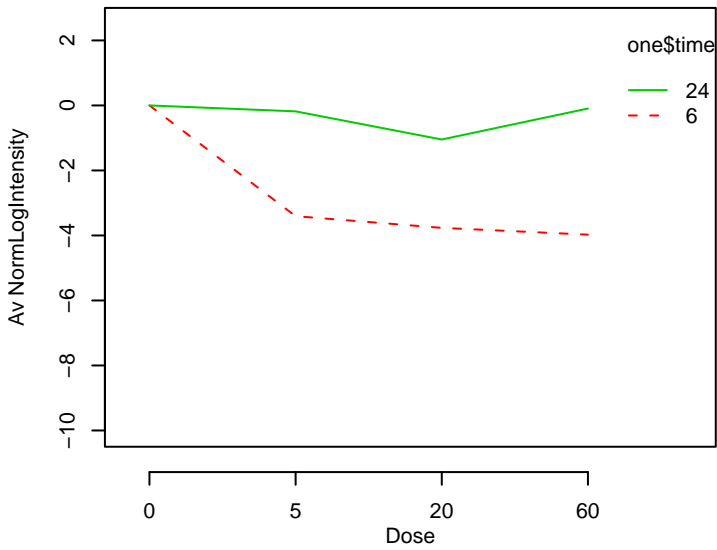

**GO\_0006968 : cellular defense response**

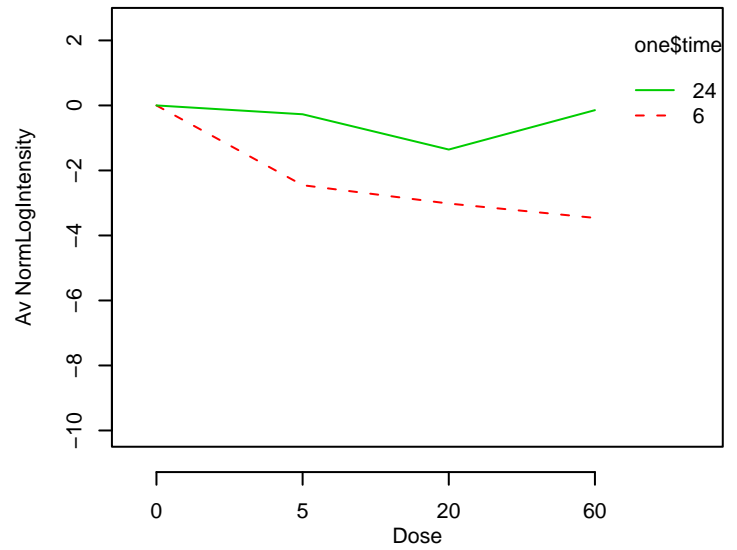

**GO\_0006970 : response to osmotic stress**

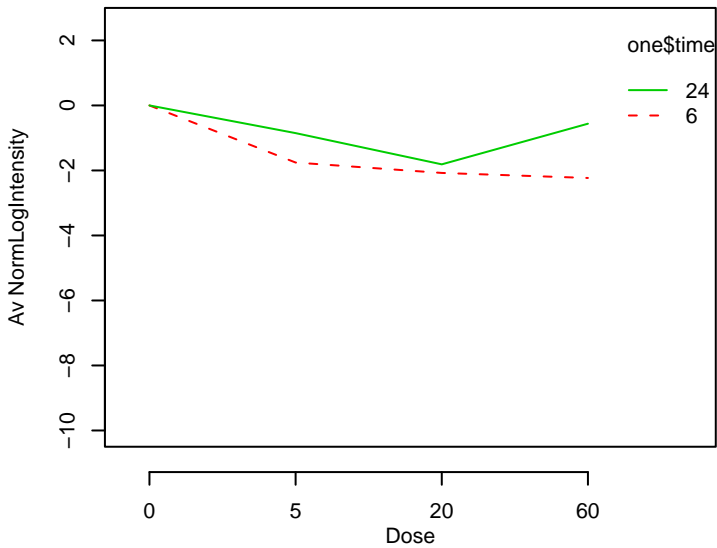

**GO\_0006972 : hyperosmotic response**

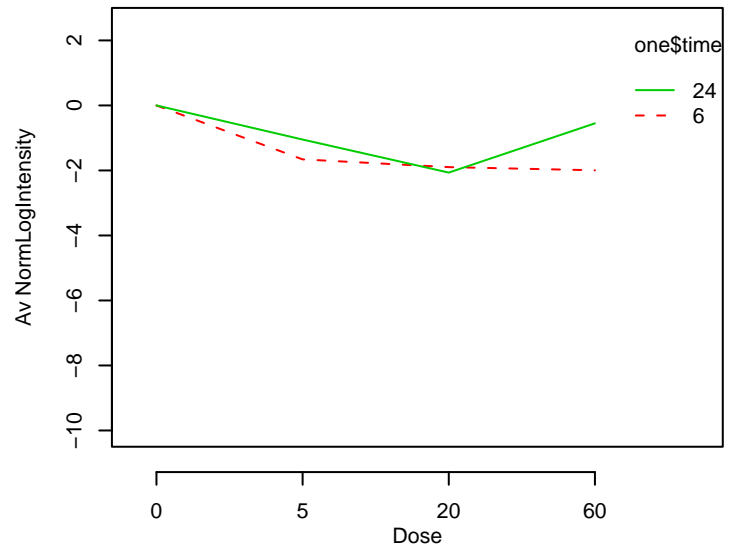

**O\_0006977 : DNA damage response, signal transduction by**

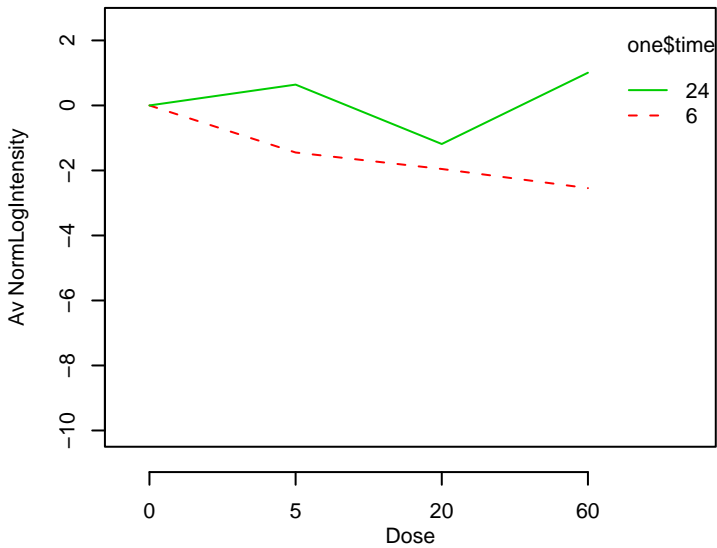

**GO\_0006979 : response to oxidative stress**

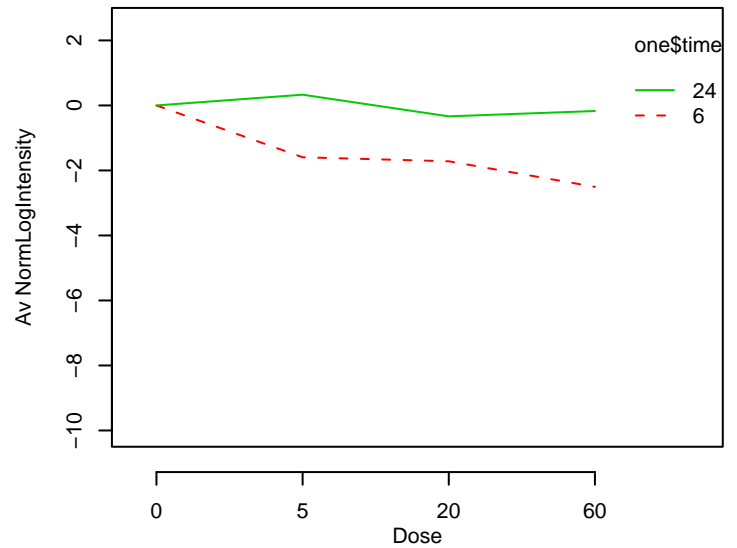

**GO\_0006984 : ER–nuclear signaling pathway**

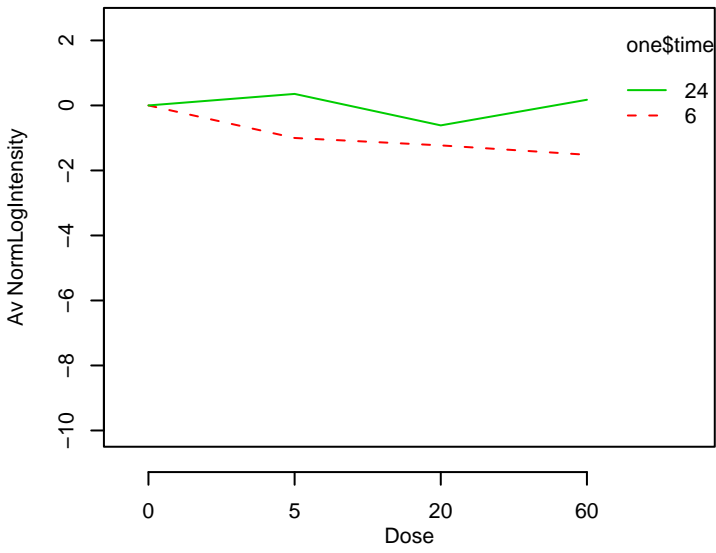

**GO\_0006986 : response to unfolded protein**

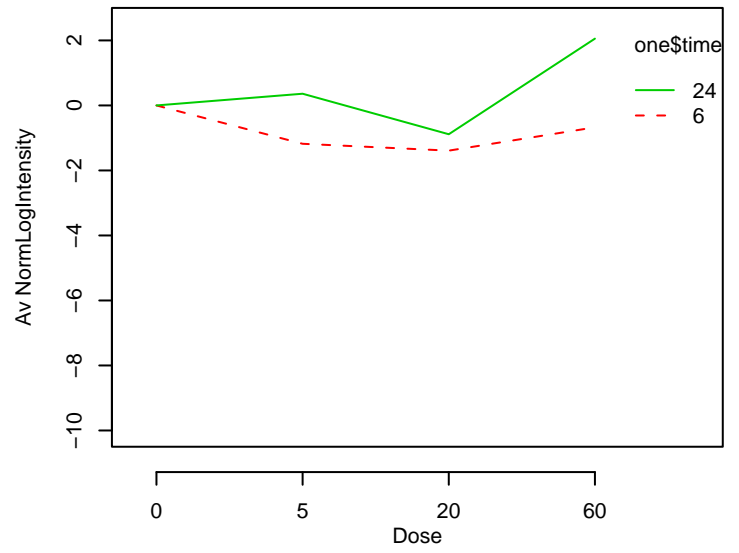

**GO\_0006997 : nuclear organization and biogenesis**

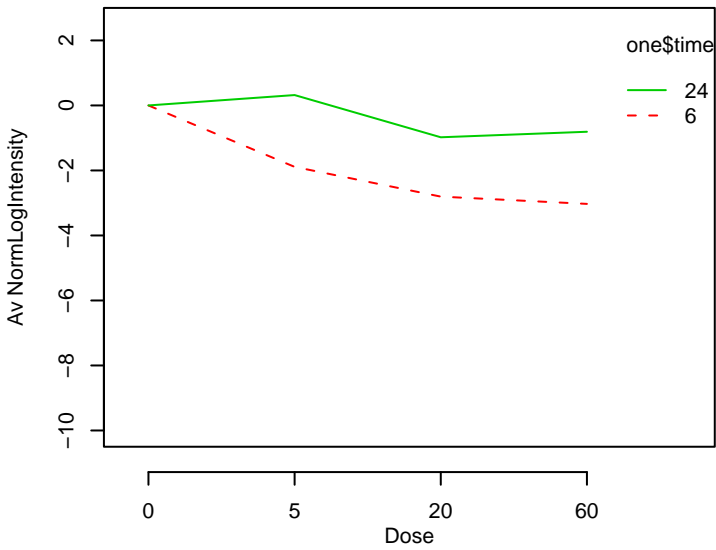

**GO\_0007004 : telomere maintenance via telomerase**

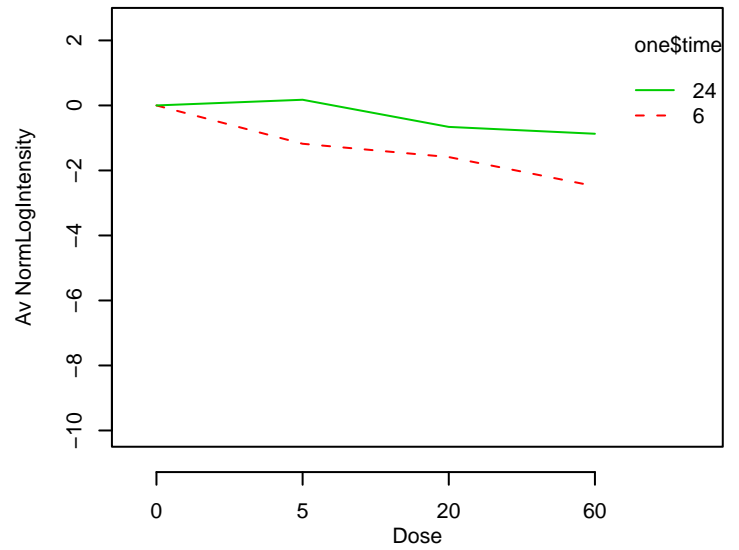

**GO\_0007005 : mitochondrion organization and biogenesis**

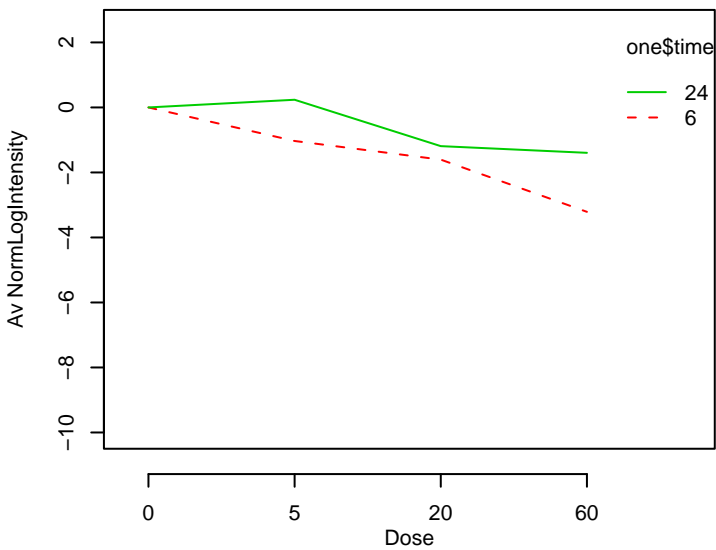

**GO\_0007006 : mitochondrial membrane organization and biogenesis**

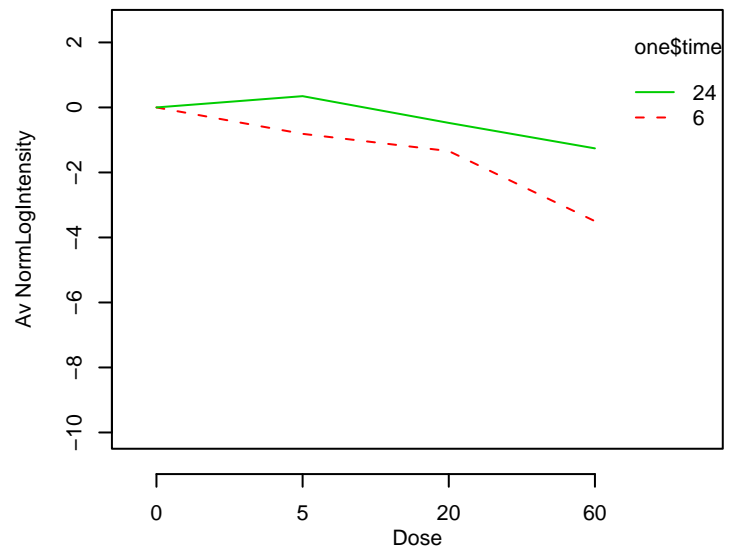

**O\_0007007 : inner mitochondrial membrane organization and** **GO\_0007009 : plasma membrane organization and biogene**

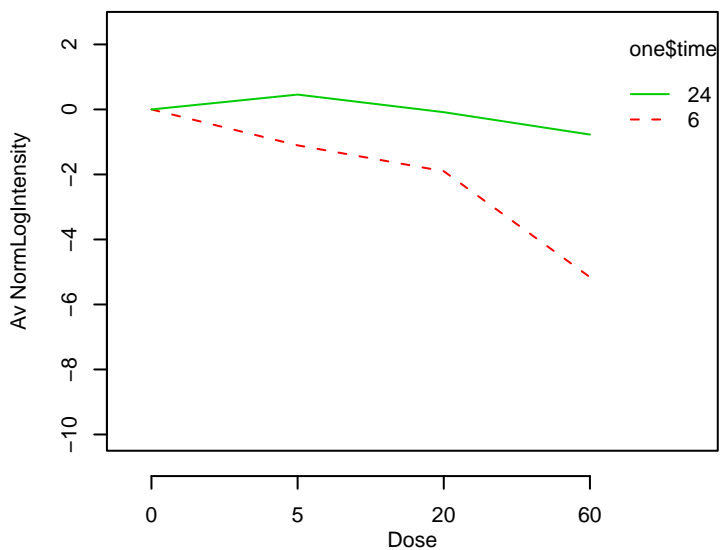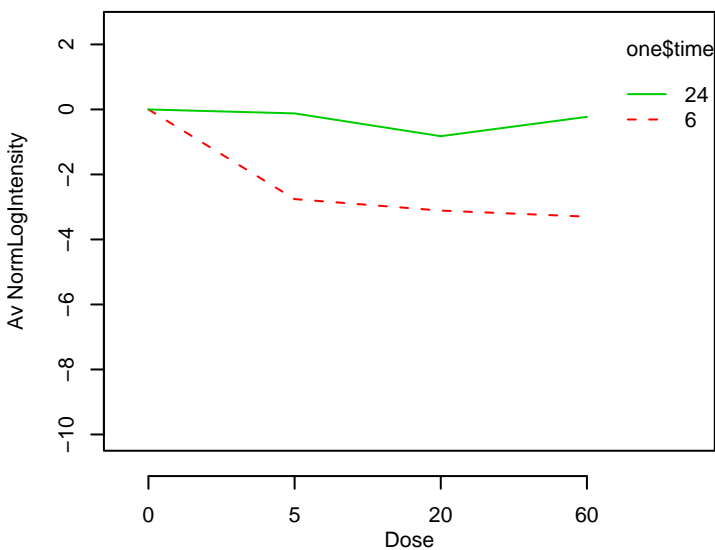

**GO\_0007015 : actin filament organization**

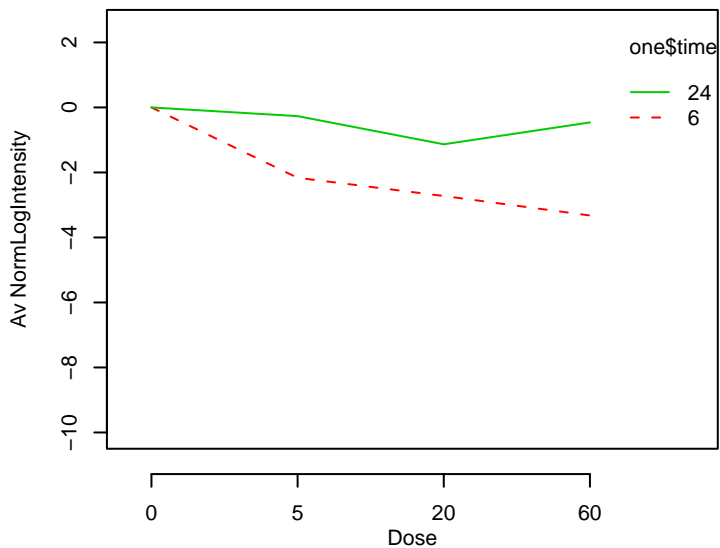

**GO\_0007016 : cytoskeletal anchoring**

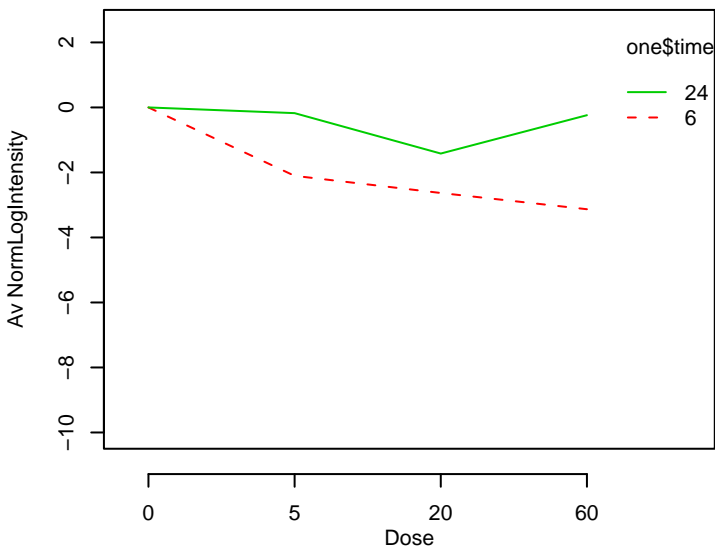

**GO\_0007017 : microtubule-based process**

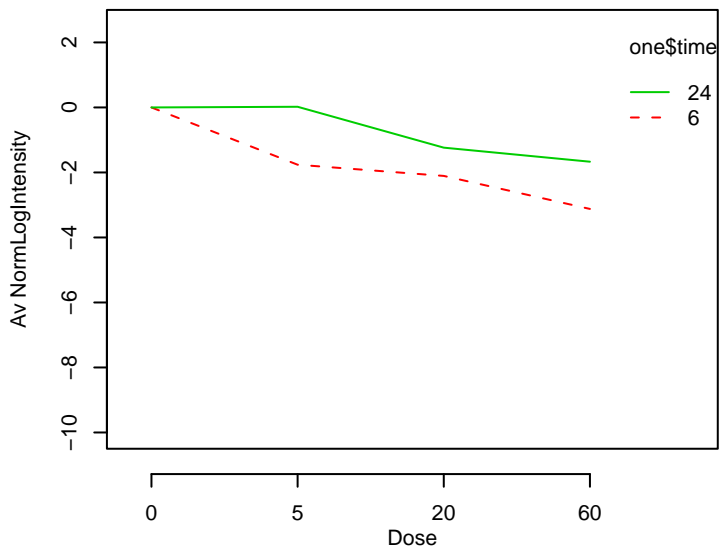

**GO\_0007018 : microtubule-based movement**

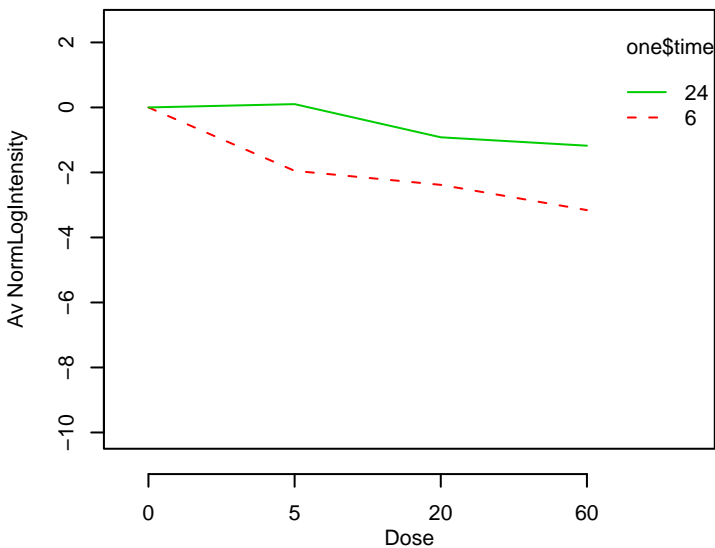

**GO\_0007019 : microtubule depolymerization**

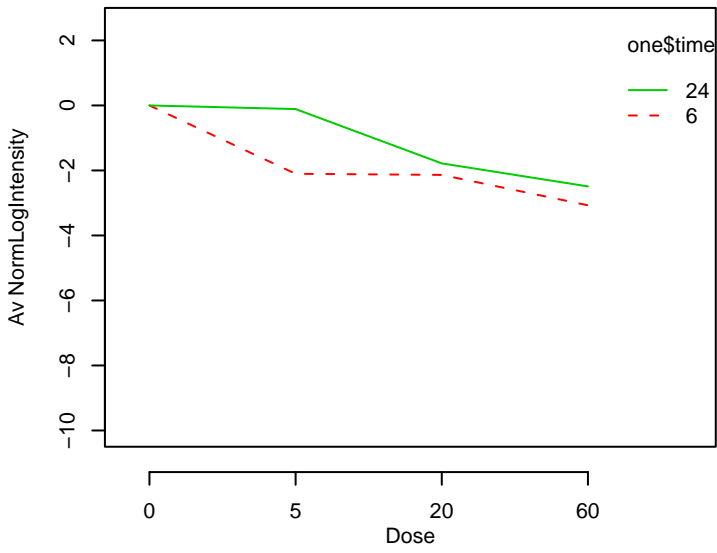

**GO\_0007020 : microtubule nucleation**

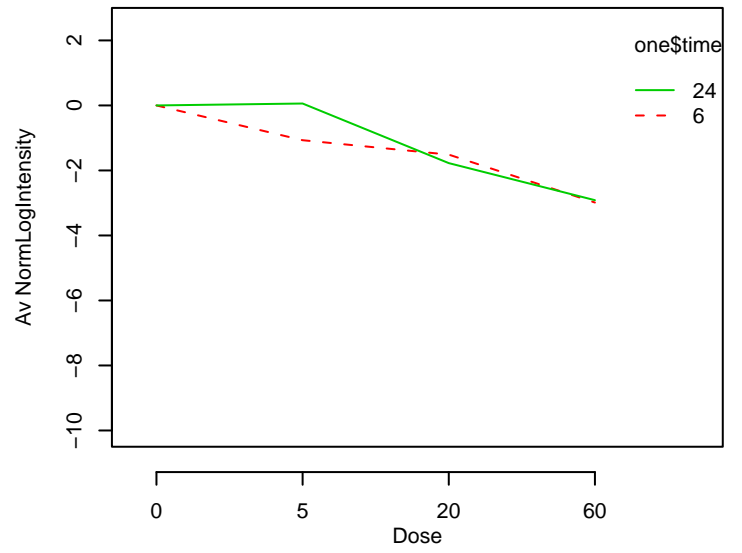

**GO\_0007021 : tubulin folding**

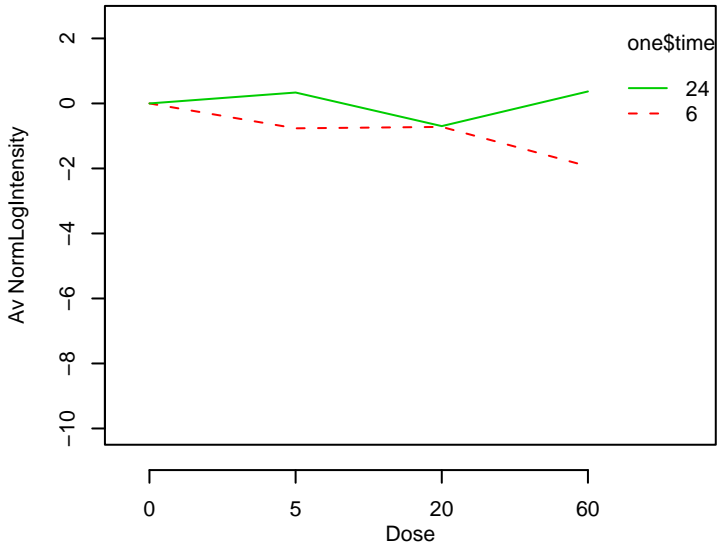

**GO\_0007025 : beta-tubulin folding**

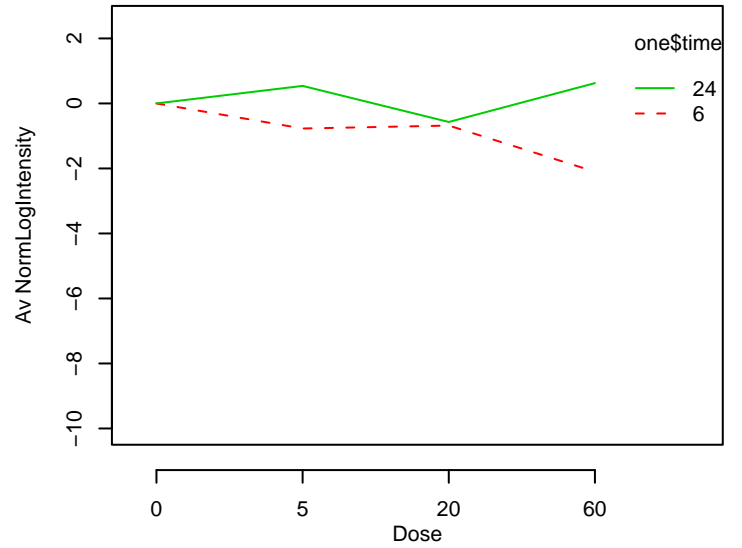

**GO\_0007026 : negative regulation of microtubule depolymeri:**

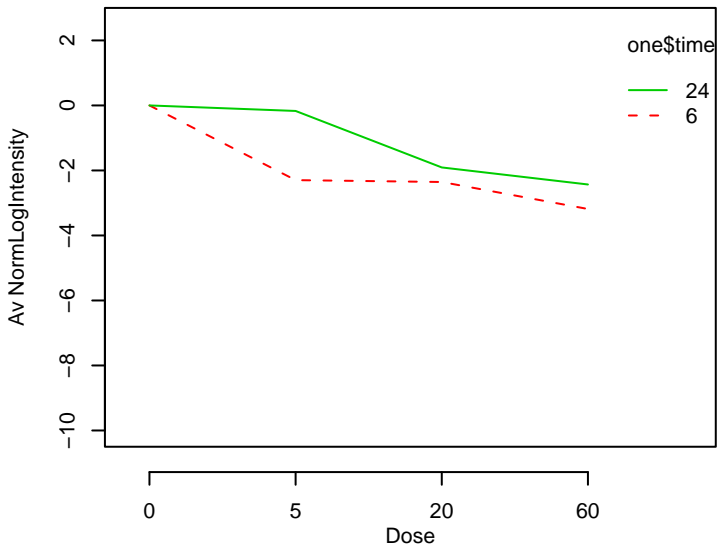

**GO\_0007028 : cytoplasm organization and biogenesis**

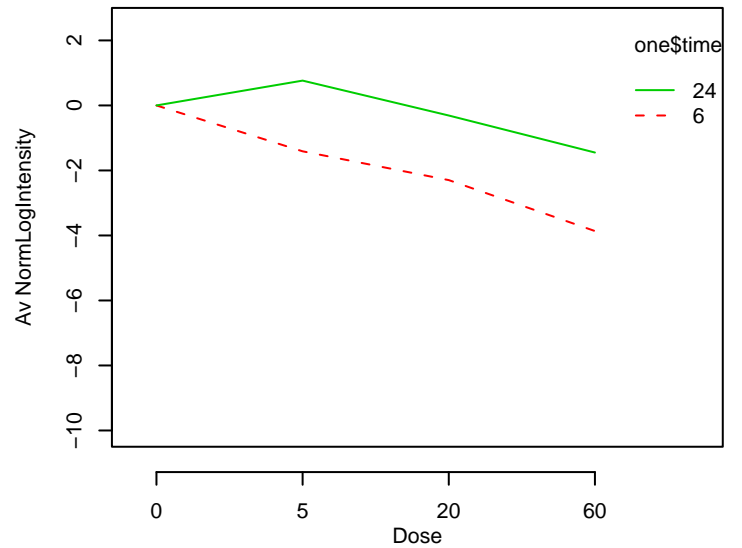

**GO\_0007030 : Golgi organization and biogenesis**

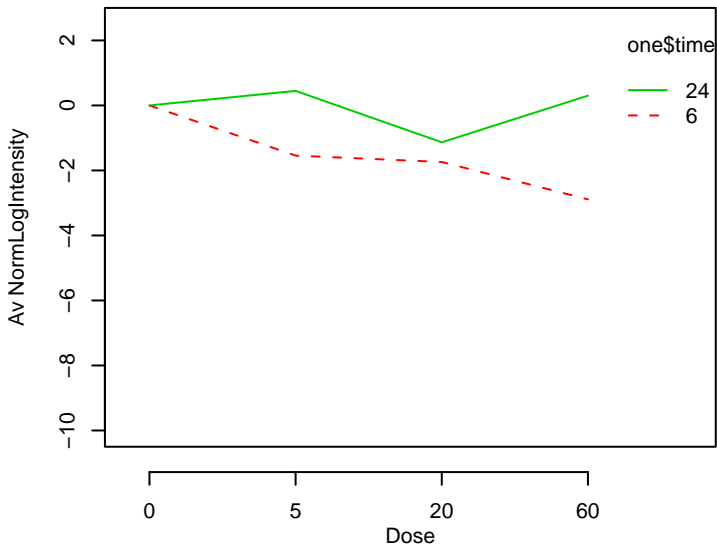

**GO\_0007031 : peroxisome organization and biogenesis**

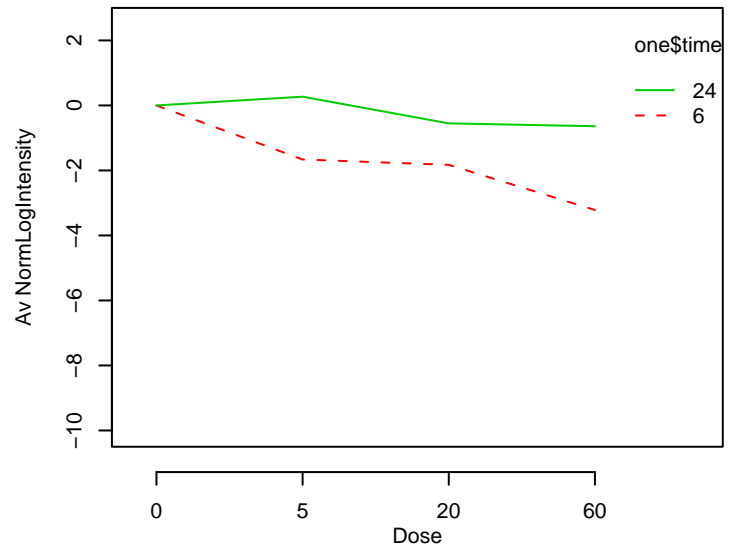

**GO\_0007032 : endosome organization and biogenesis**

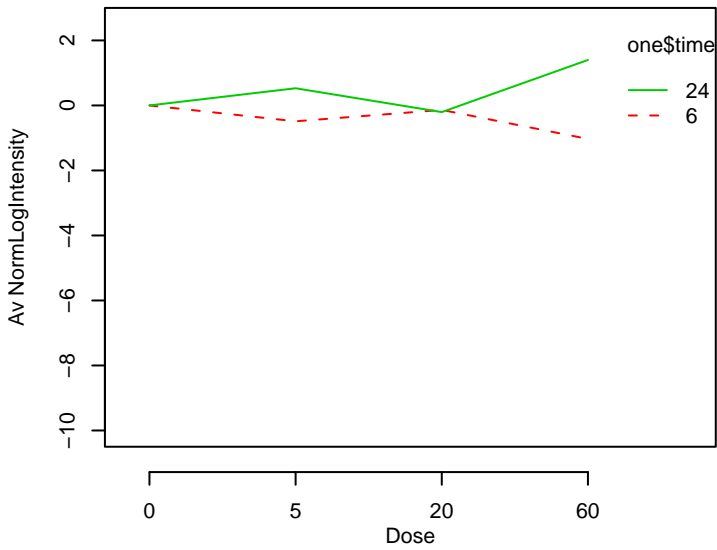

**GO\_0007033 : vacuole organization and biogenesis**

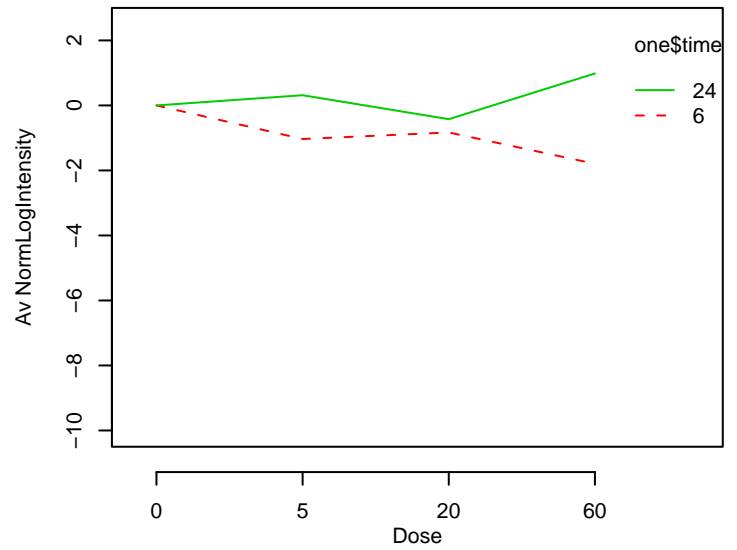

**GO\_0007034 : vacuolar transport**

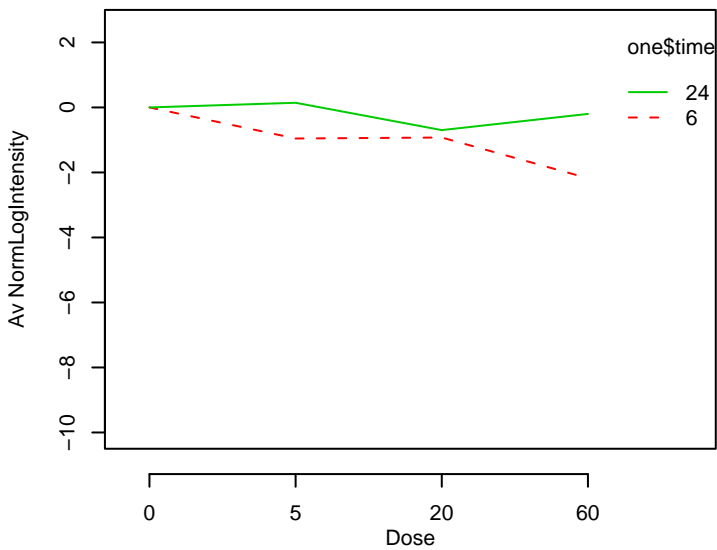

**GO\_0007040 : lysosome organization and biogenesis**

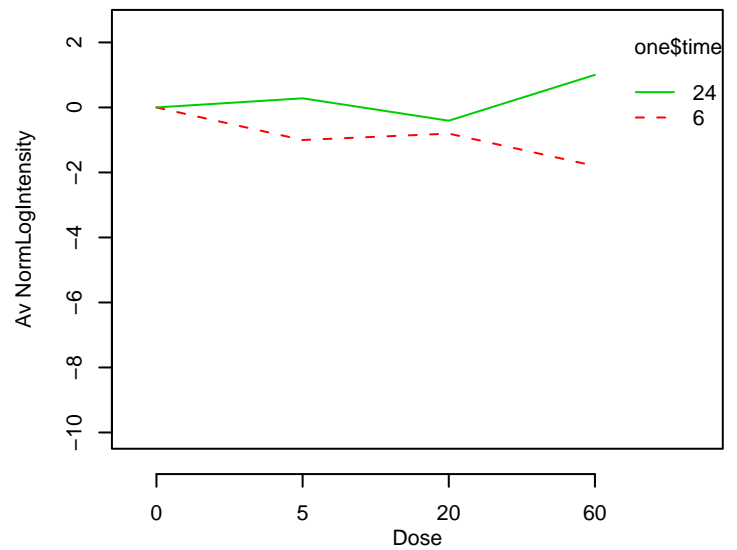

**GO\_0007041 : lysosomal transport**

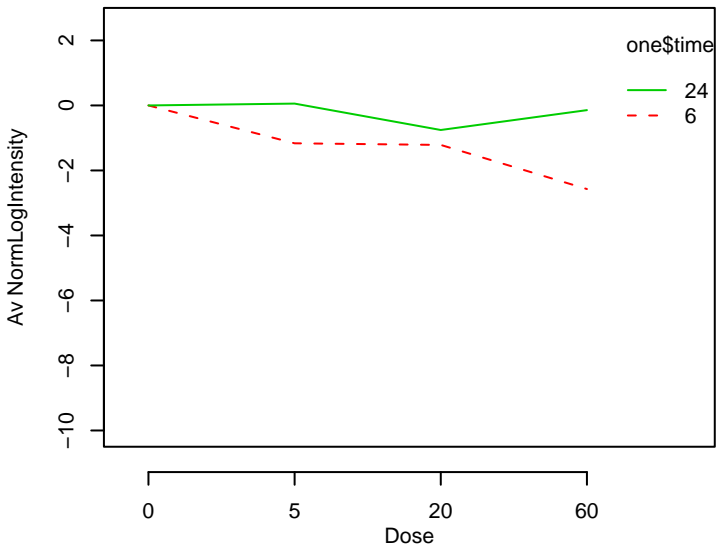

**GO\_0007043 : intercellular junction assembly**

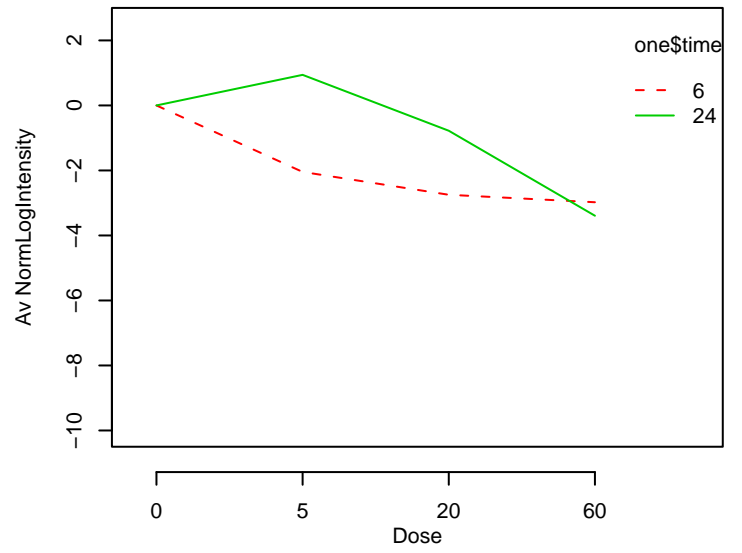

**GO\_0007044 : cell-substrate junction assembly**

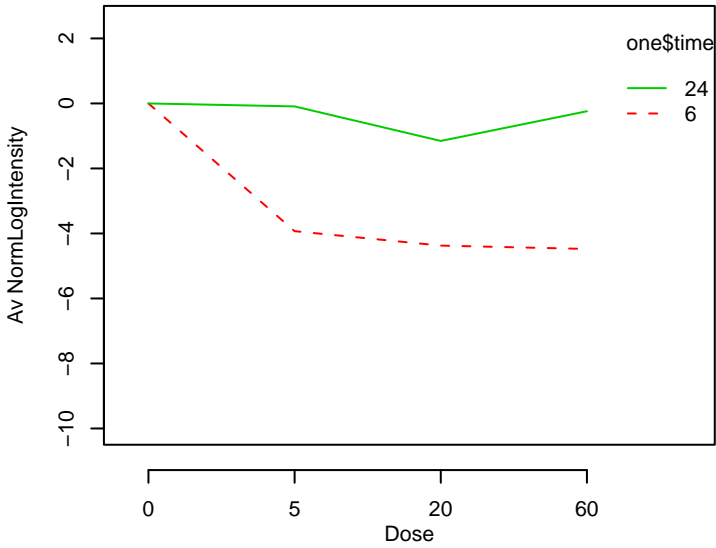

**GO\_0007046 : ribosome biogenesis**

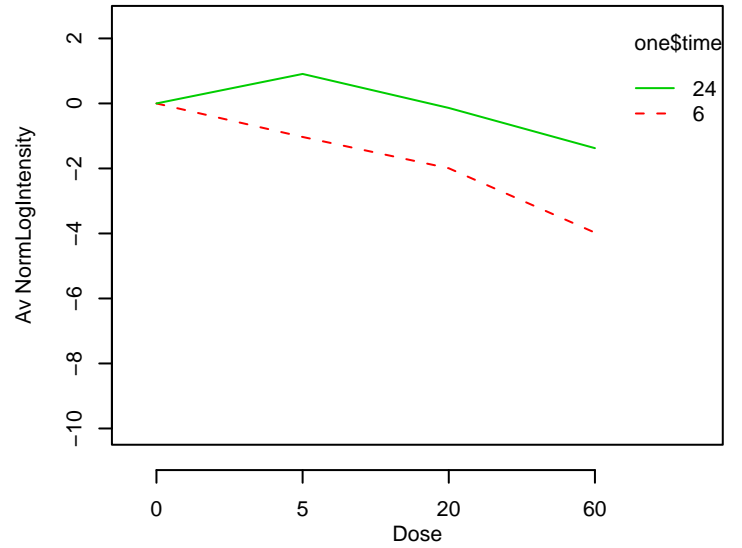

**GO\_0007050 : cell cycle arrest**

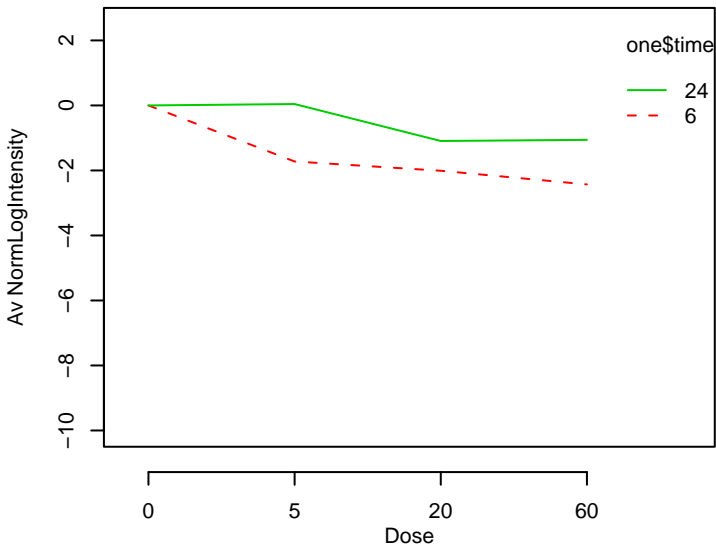

**GO\_0007051 : spindle organization and biogenesis**

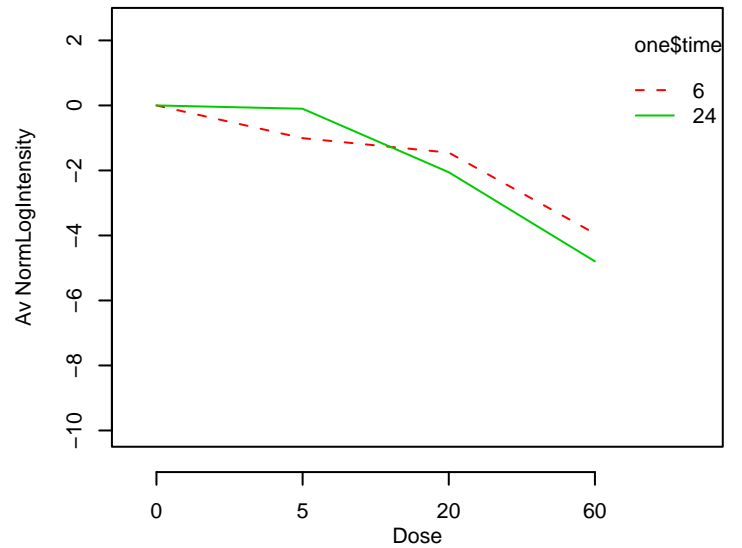



**GO\_0007052 : mitotic spindle organization and biogenesis**

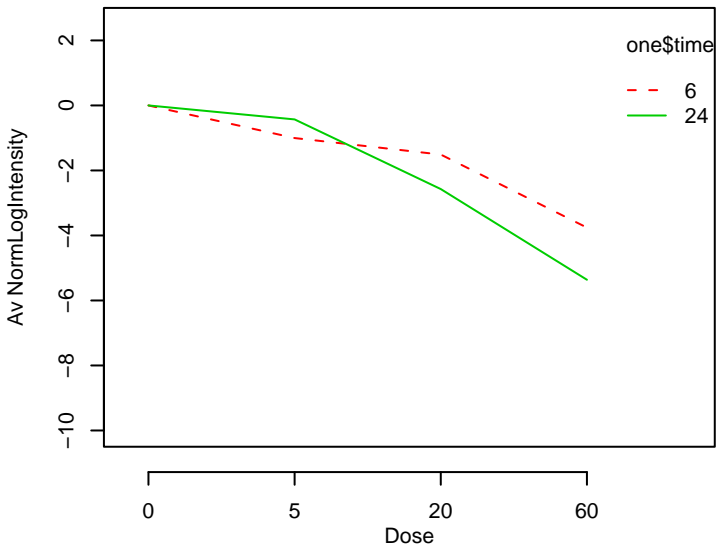

**GO\_0007059 : chromosome segregation**

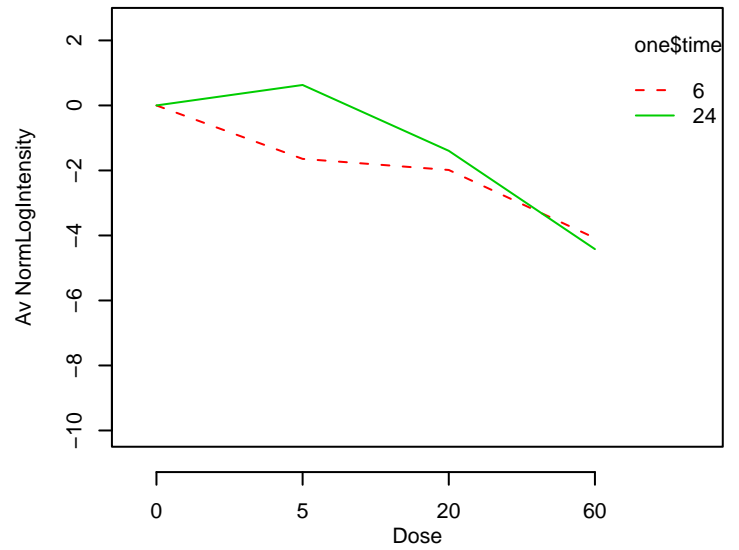

**GO\_0007062 : sister chromatid cohesion**

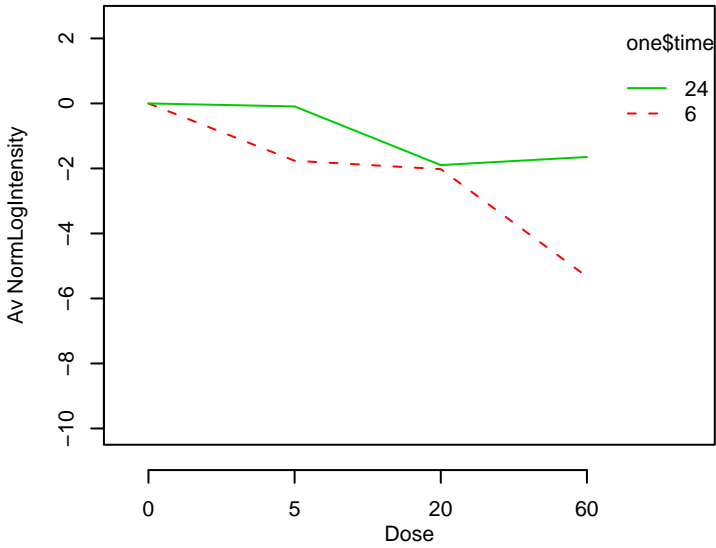

**GO\_0007067 : mitosis**

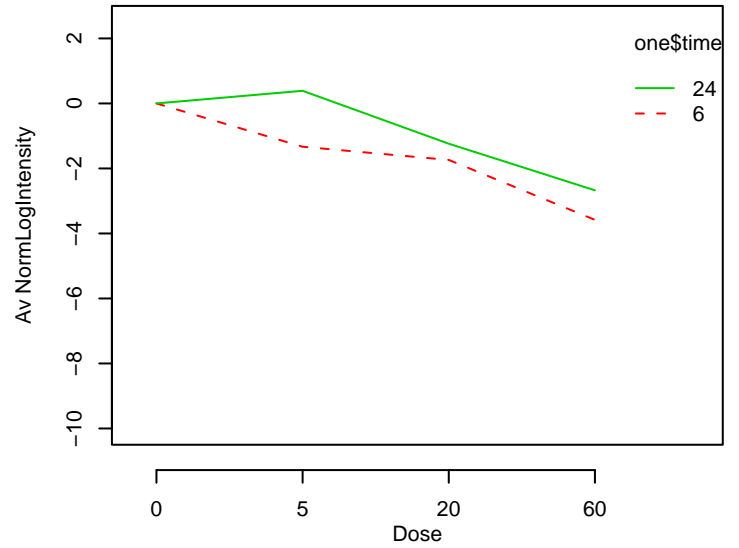

**GO\_0007076 : mitotic chromosome condensation**

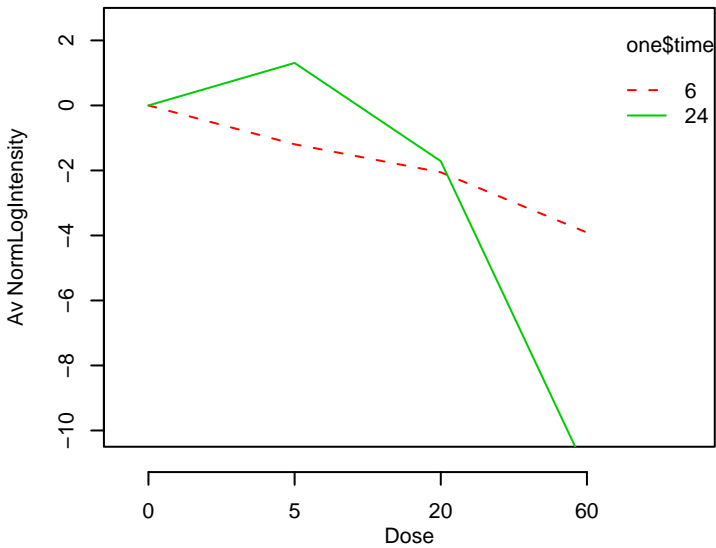

**GO\_0007088 : regulation of mitosis**

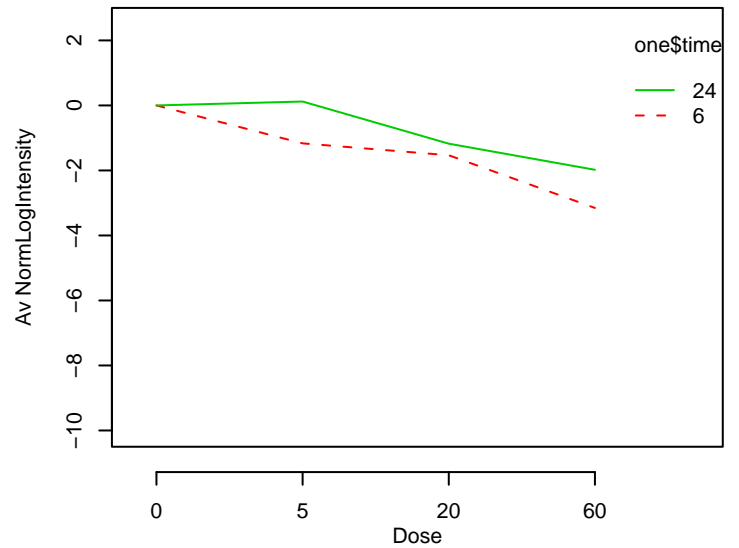

**GO\_0007089 : traversing start control point of mitotic cell c**

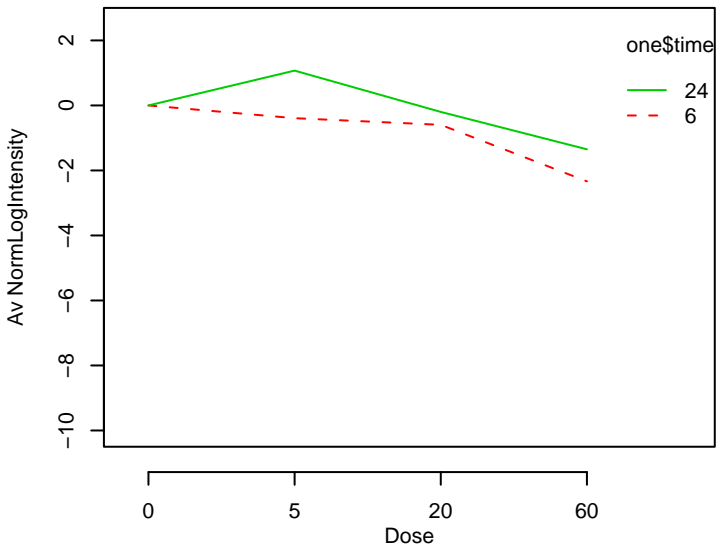

**GO\_0007090 : regulation of S phase of mitotic cell cycle**

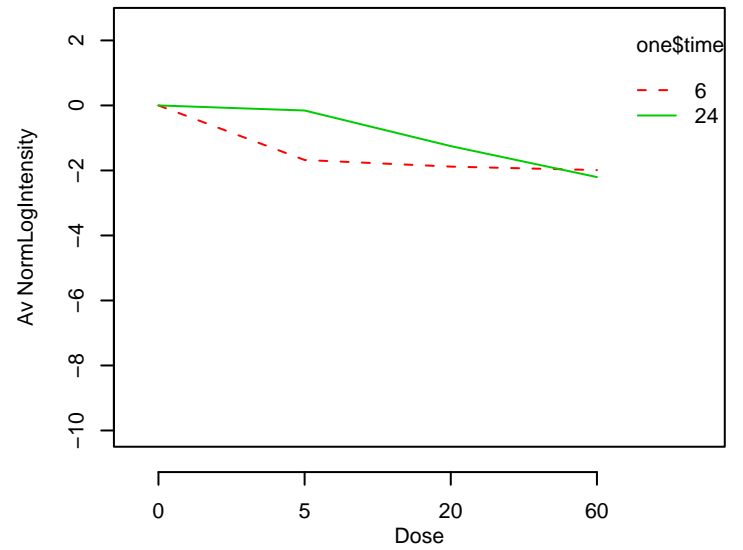

**GO\_0007091 : mitotic metaphase/anaphase transition**

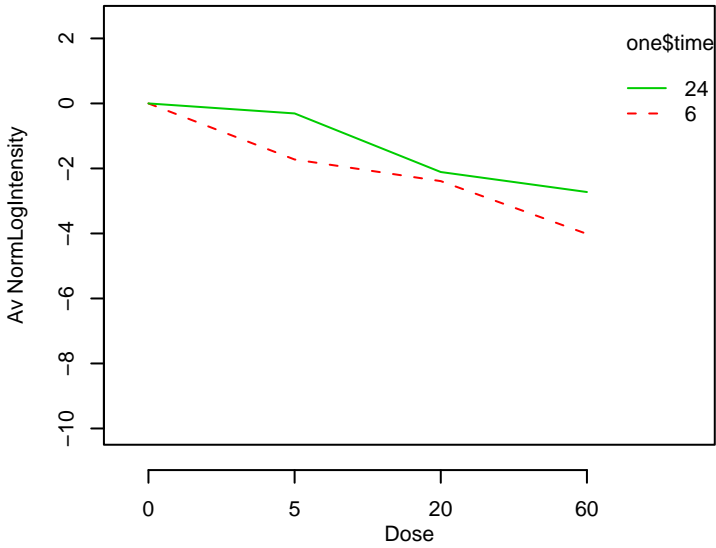

**GO\_0007093 : mitotic checkpoint**

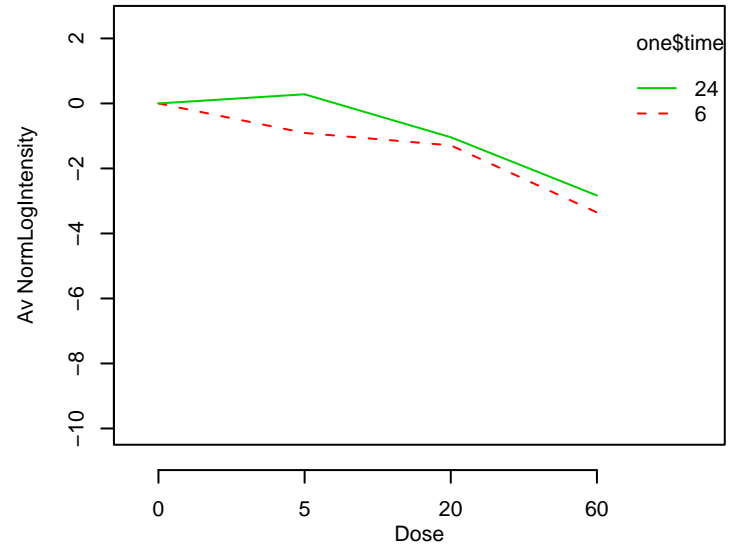

**GO\_0007094 : mitotic spindle checkpoint**

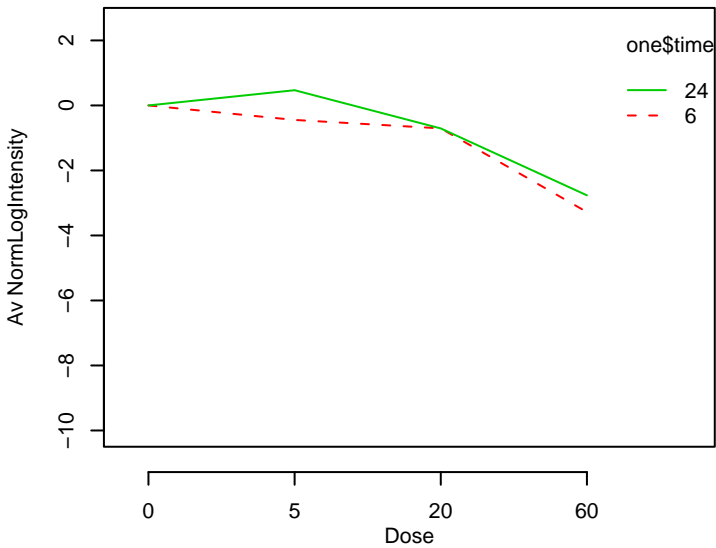

**GO\_0007096 : regulation of exit from mitosis**

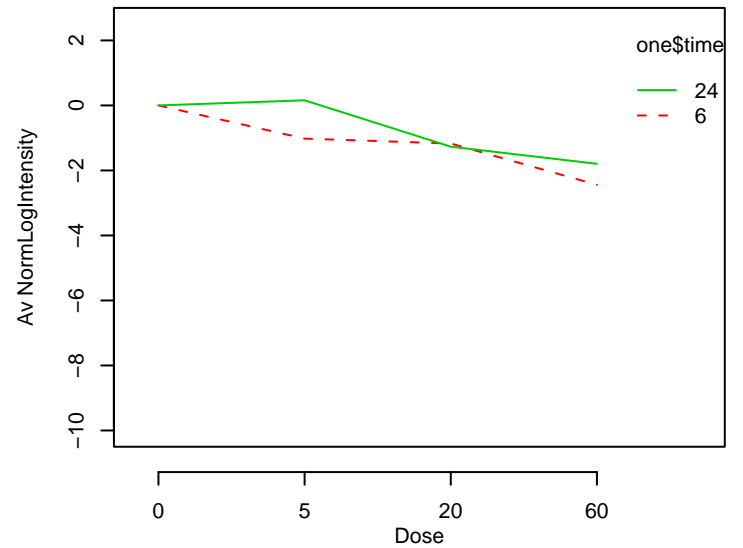

**GO\_0007098 : centrosome cycle**

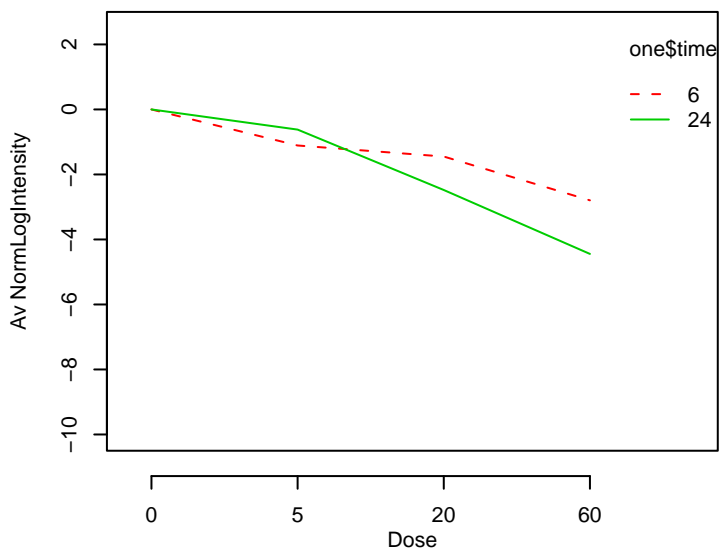

**GO\_0007126 : meiosis**

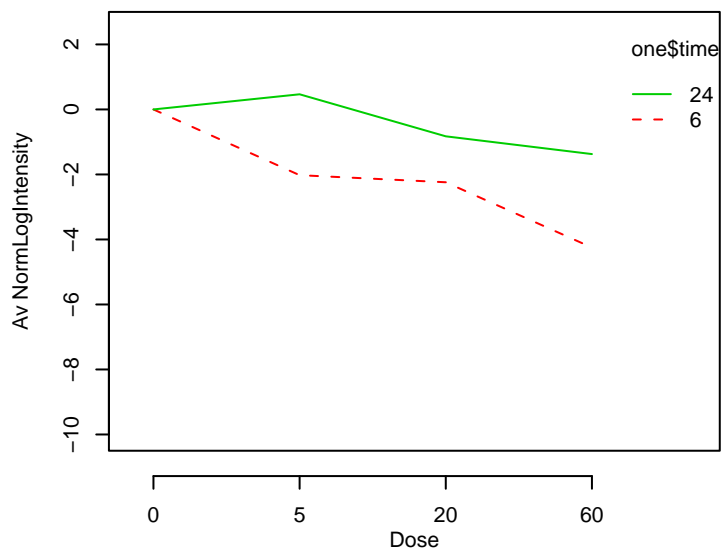

**GO\_0007127 : meiosis I**

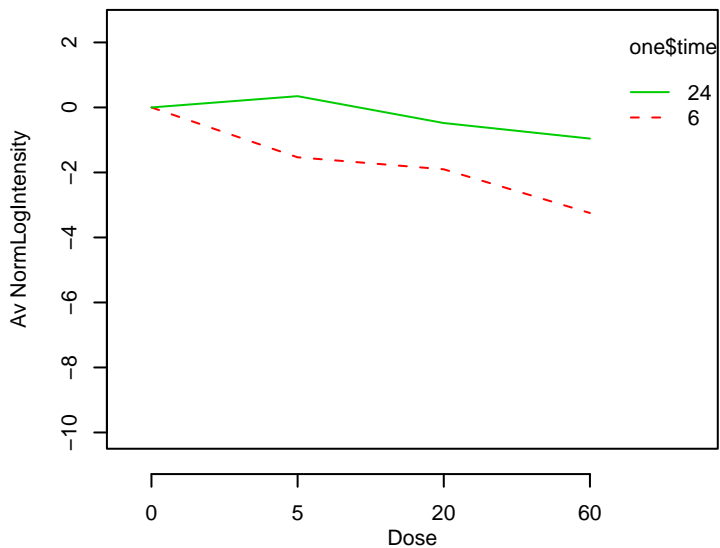

**GO\_0007128 : meiotic prophase I**

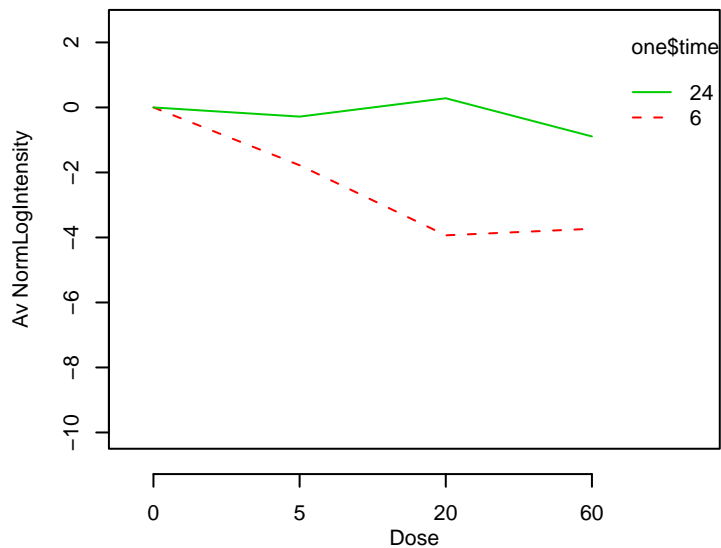

**GO\_0007129 : synapsis**

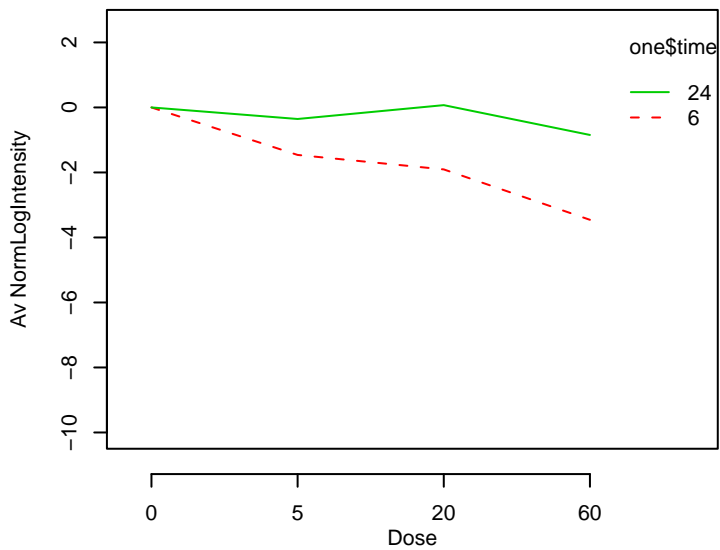

**GO\_0007130 : synaptonemal complex formation**

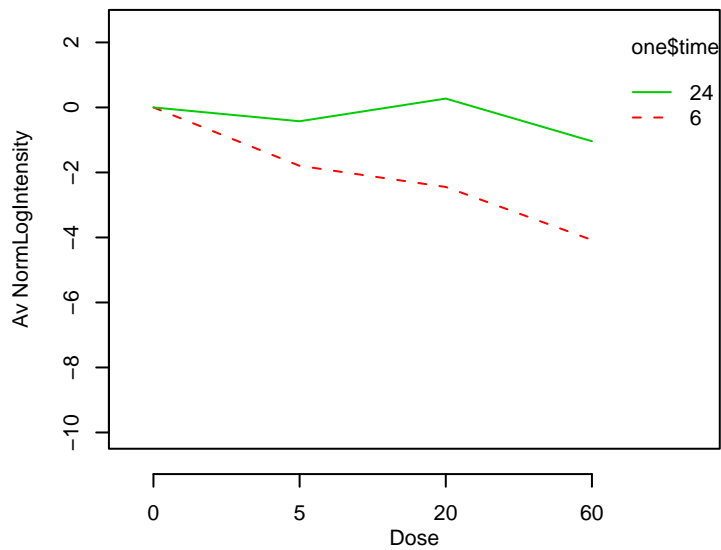

**GO\_0007131 : meiotic recombination**

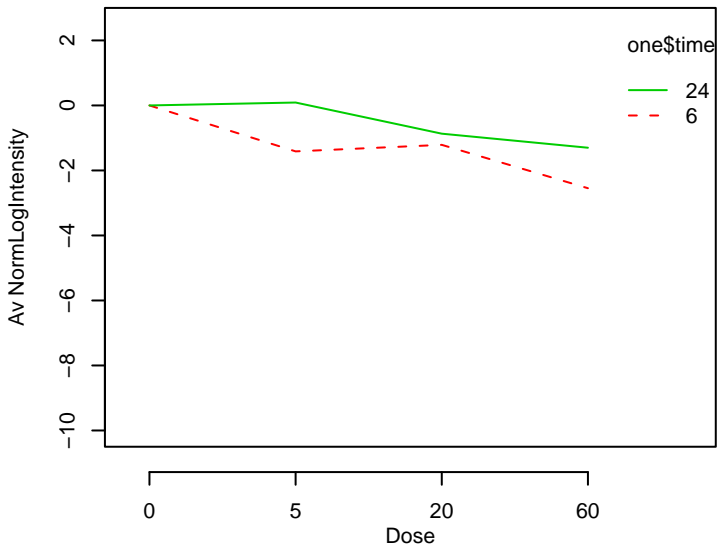

**GO\_0007140 : male meiosis**

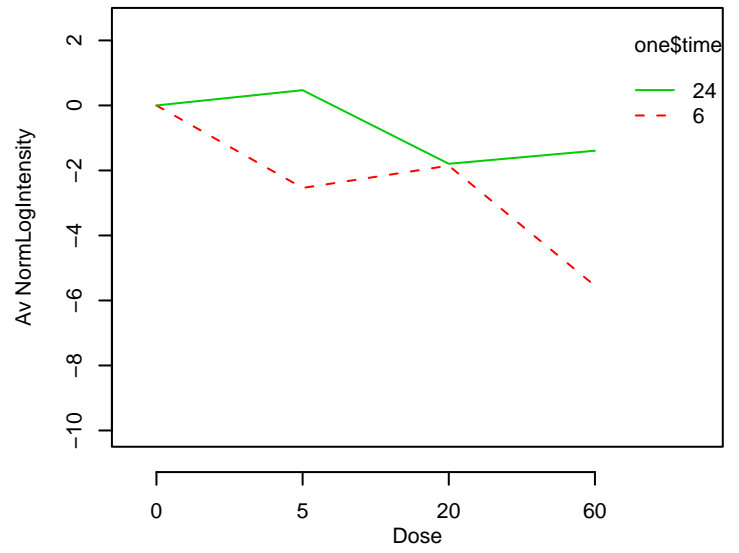

**GO\_0007156 : homophilic cell adhesion**

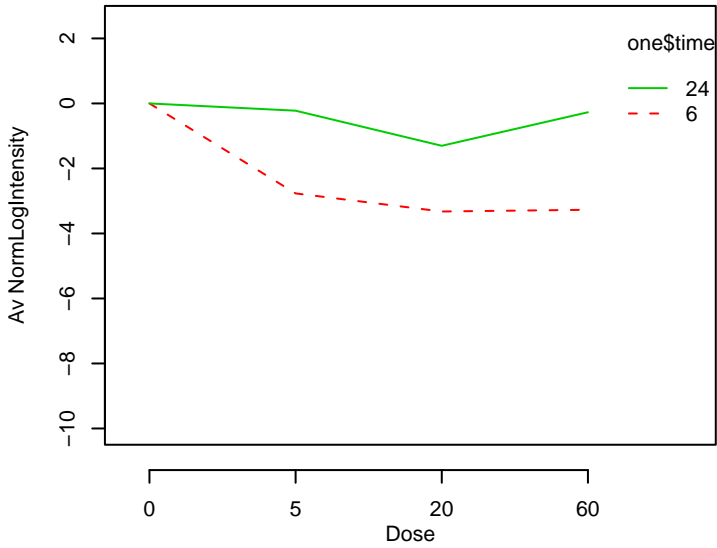

**GO\_0007157 : heterophilic cell adhesion**

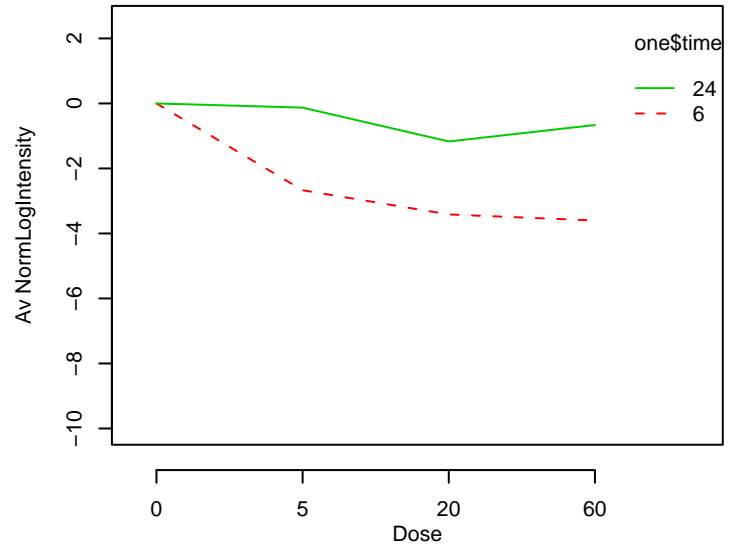

**GO\_0007158 : neuron adhesion**

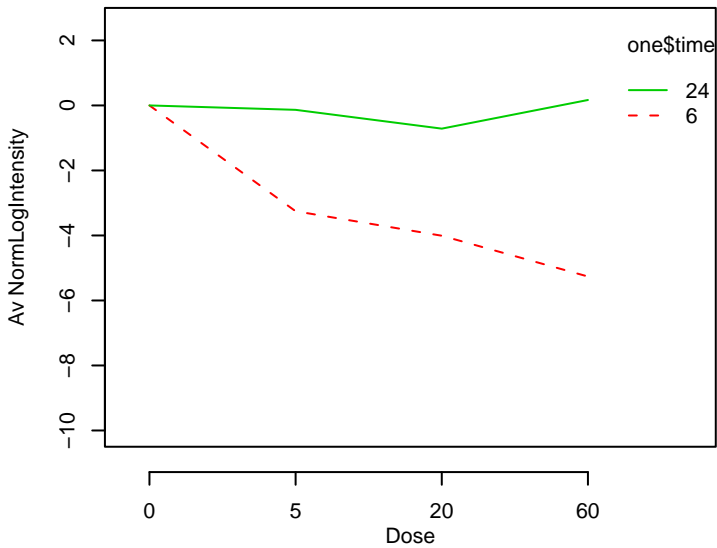

**GO\_0007159 : leukocyte adhesion**

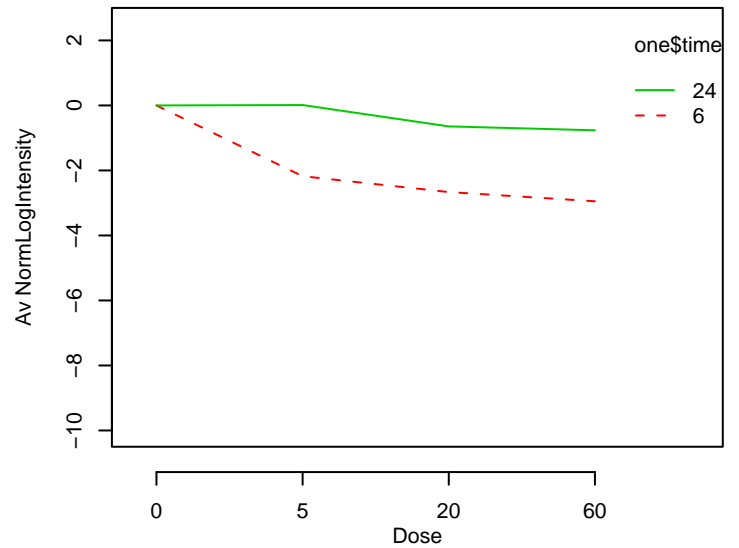

**GO\_0007160 : cell-matrix adhesion**

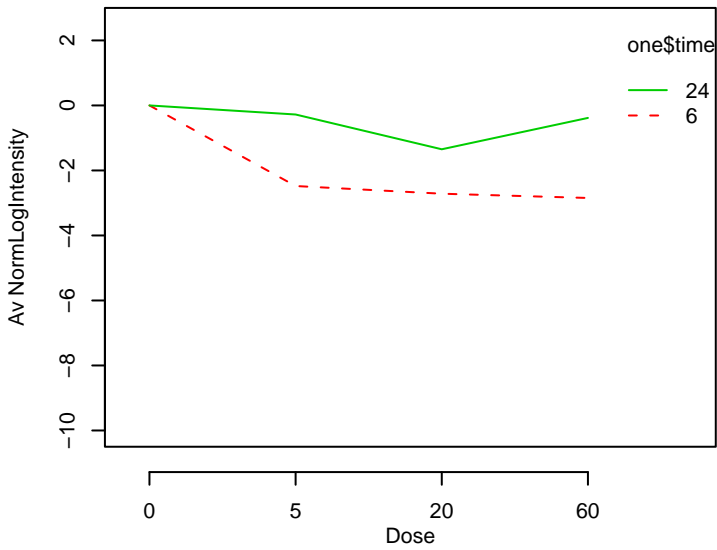

**GO\_0007162 : negative regulation of cell adhesion**

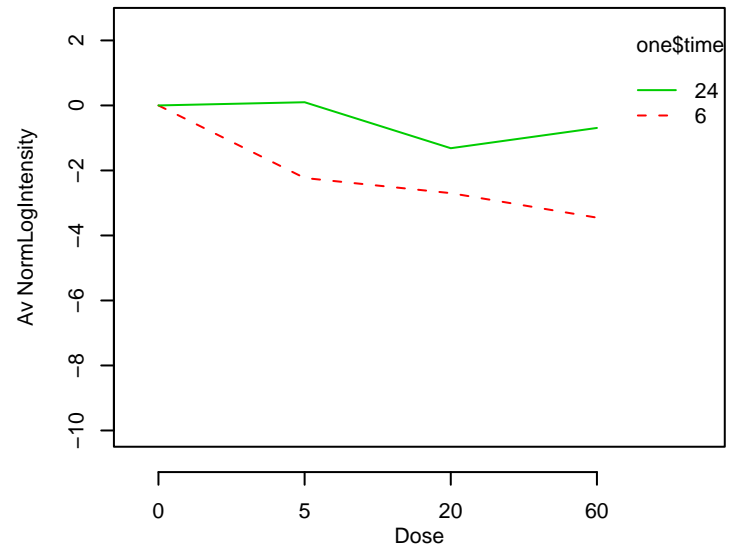

**GO\_0007163 : establishment and/or maintenance of cell pola**

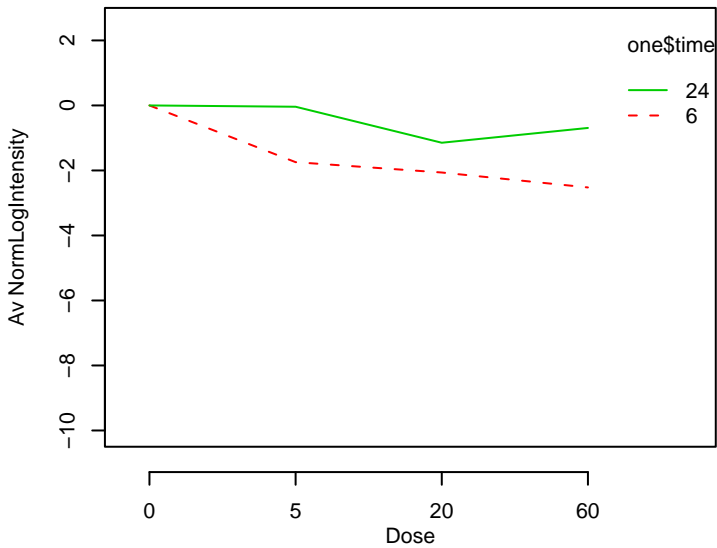

**GO\_0007164 : establishment of tissue polarity**

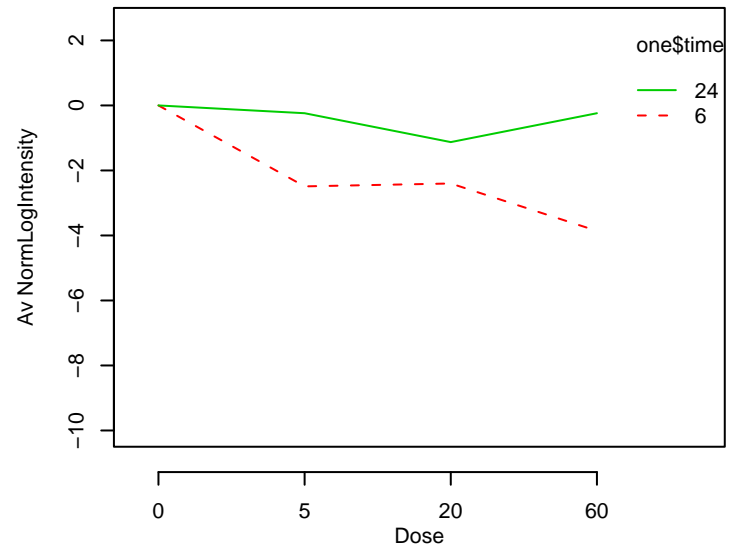

**GO\_0007168 : receptor guanylyl cyclase signaling pathwa** **GO\_0007169 : transmembrane receptor protein tyrosine kinas**

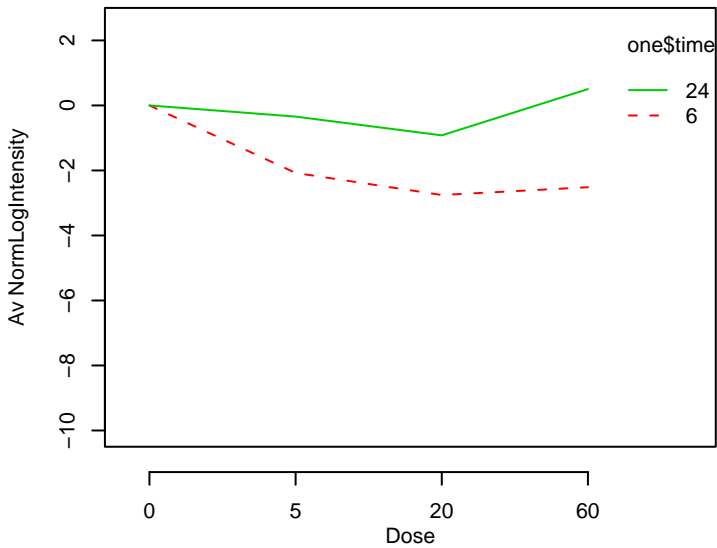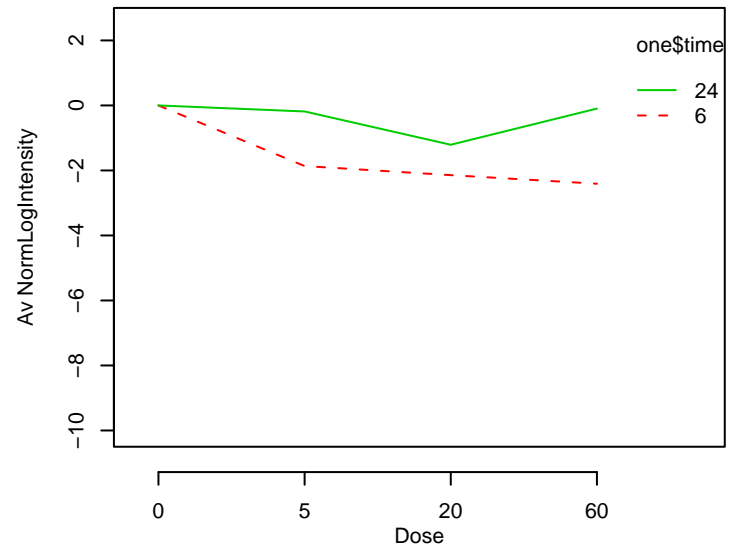

**GO\_0007172 : signal complex formation**

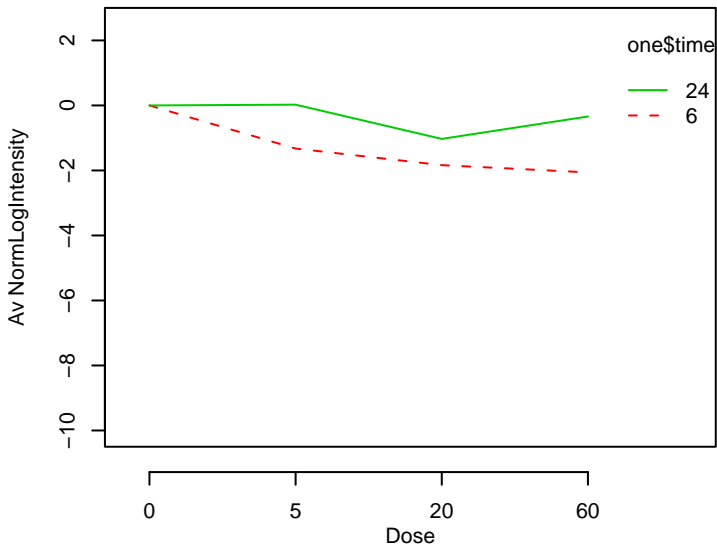

**GO\_0007173 : epidermal growth factor receptor signaling path**

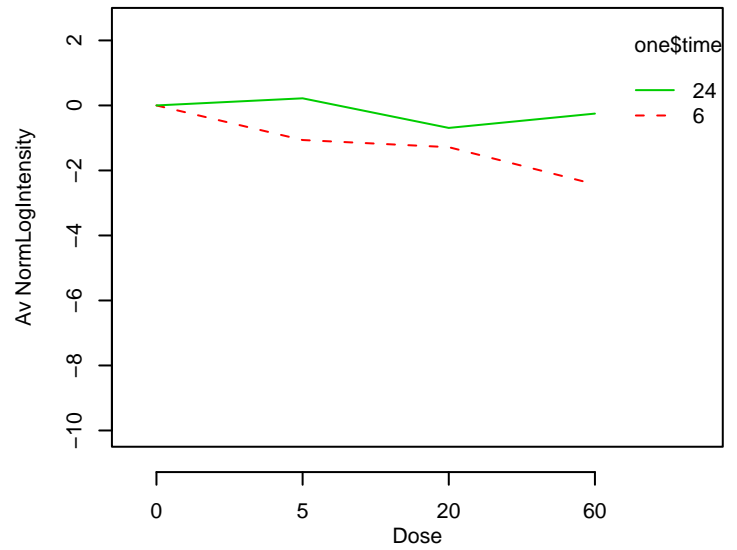

**GO\_0007176 : regulation of epidermal growth factor receptor signaling pathway**

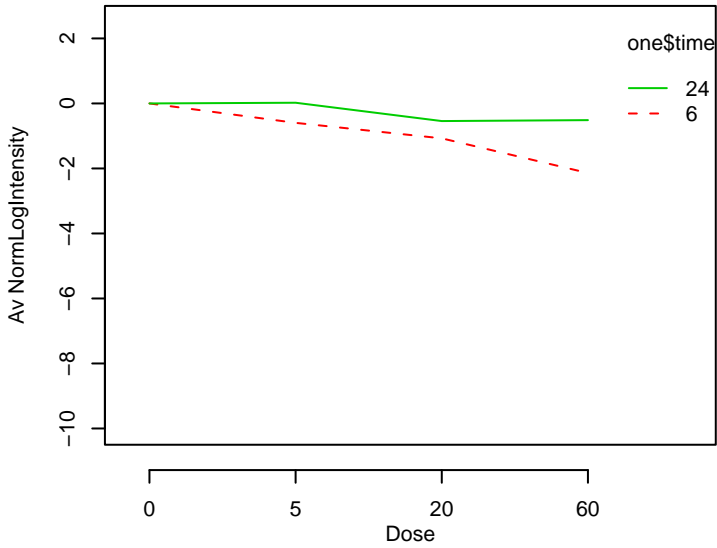

**GO\_0007178 : transmembrane receptor protein serine/threonine kinase**

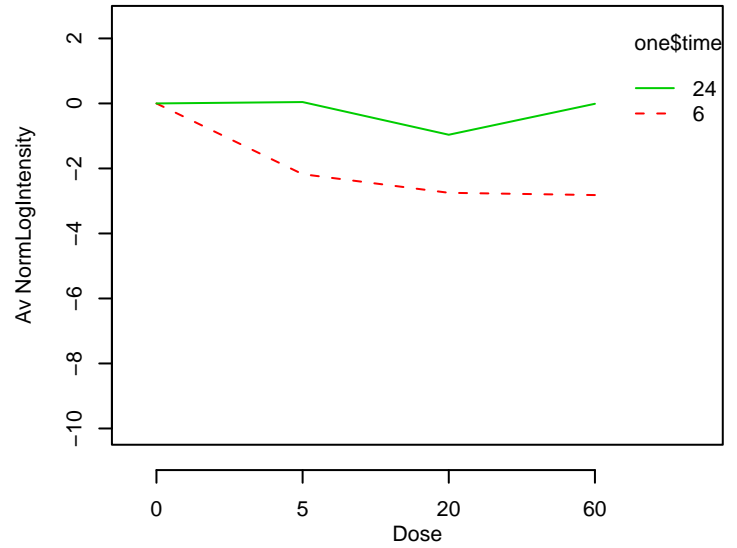

**GO\_0007179 : transforming growth factor beta receptor signaling pathway**

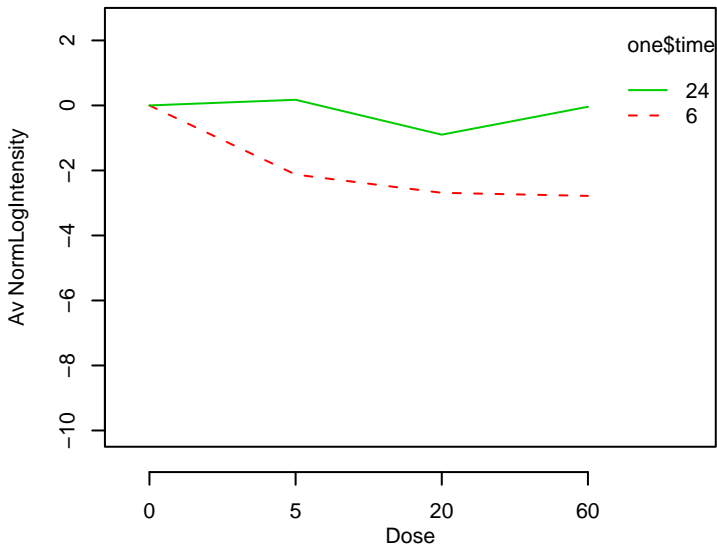

**GO\_0007185 : transmembrane receptor protein tyrosine phosphatase**

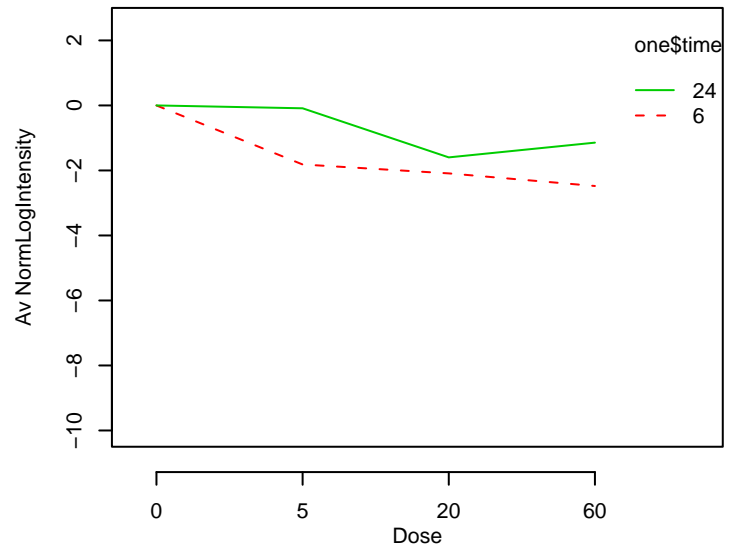

GO\_0007187 : G-protein signaling, coupled to cyclic nucleot  
GO\_0007188 : G-protein signaling, coupled to cAMP nucleot

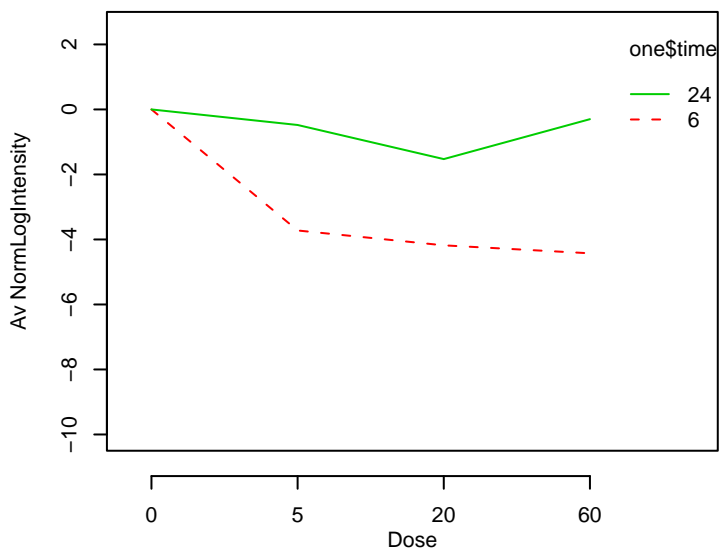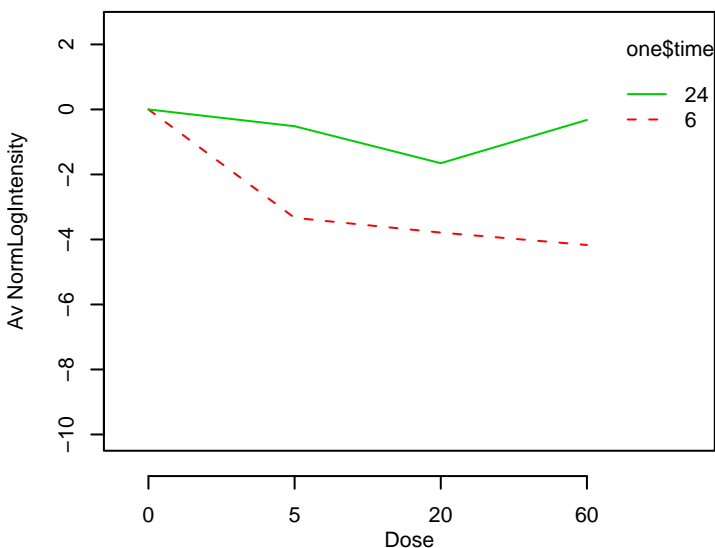

GO\_0007189 : G-protein signaling, adenylate cyclase activa

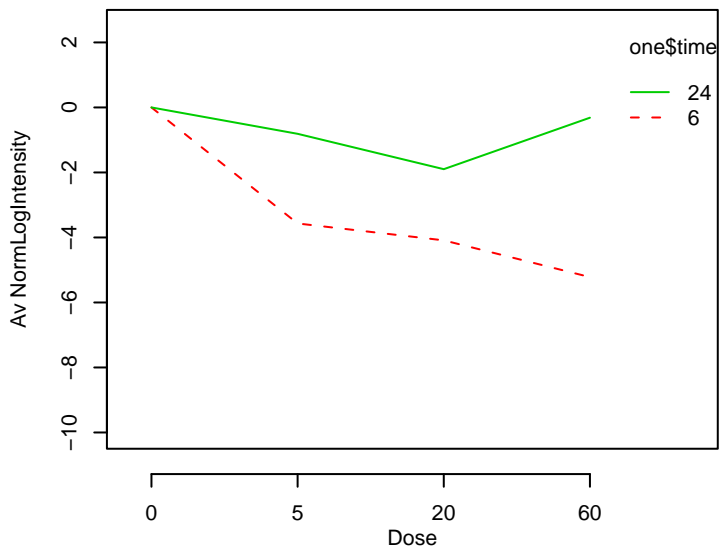

GO\_0007190 : adenylate cyclase activation

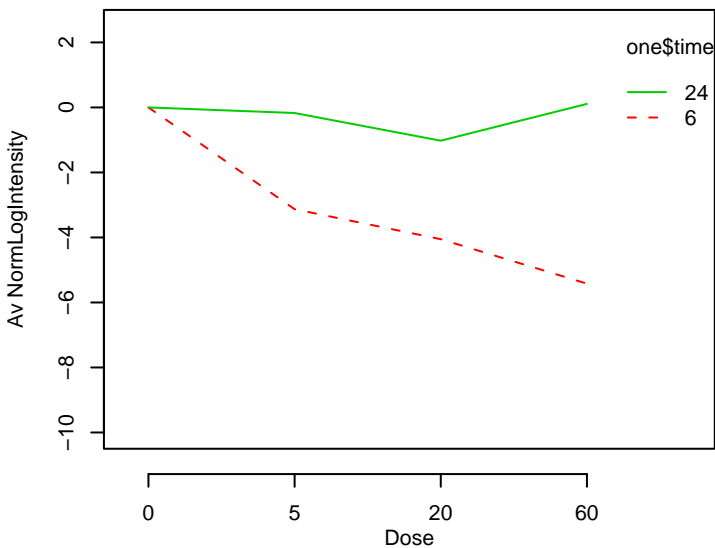

GO\_0007193 : G-protein signaling, adenylate cyclase inhibi  
GO\_0007194 : negative regulation of adenylate cyclase activ

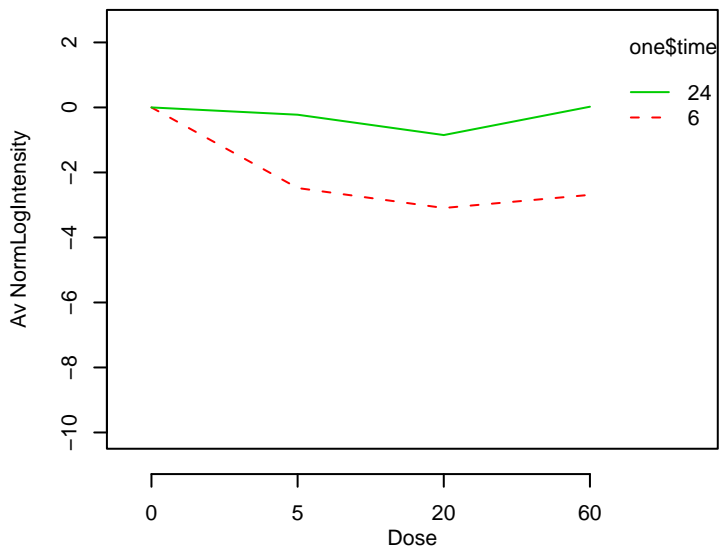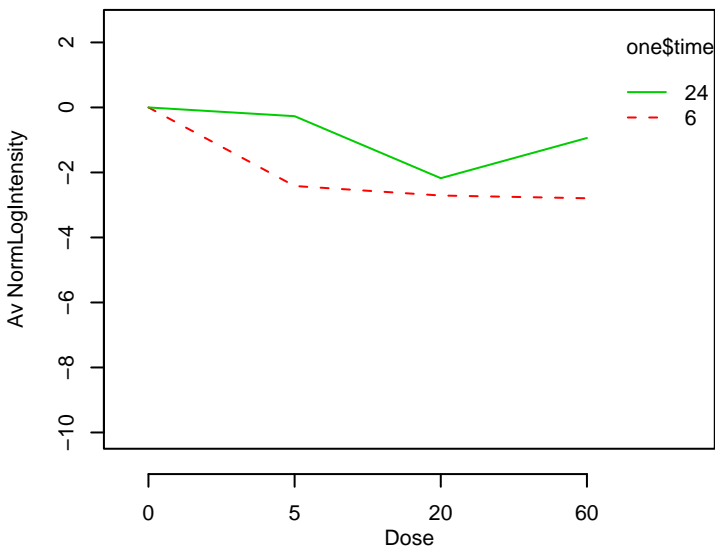

**GO\_0007200 : G-protein signaling, coupled to IP3 second me**

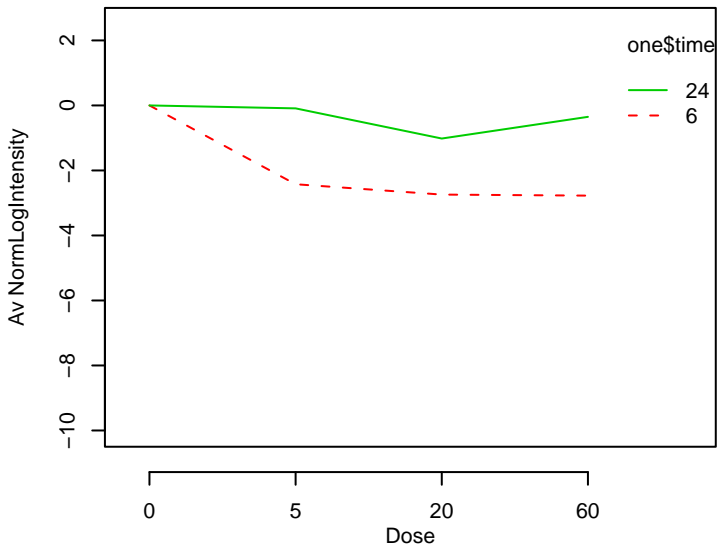

**GO\_0007202 : phospholipase C activation**

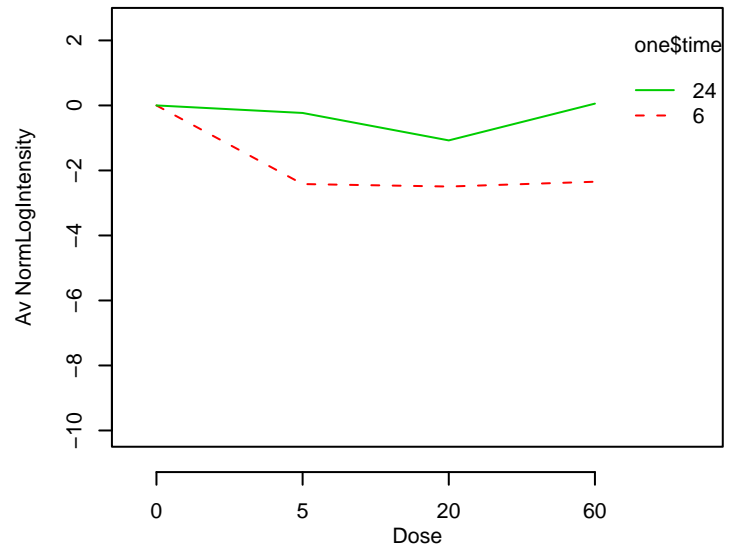

**GO\_0007204 : elevation of cytosolic calcium ion concentrati**

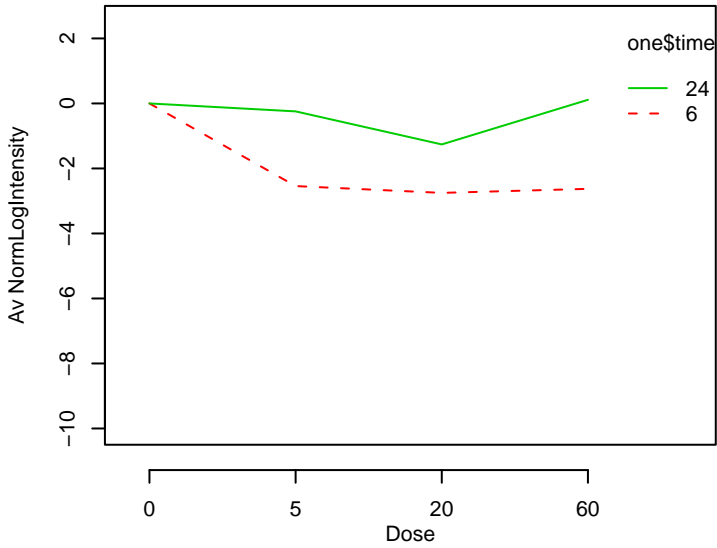

**GO\_0007205 : protein kinase C activation**

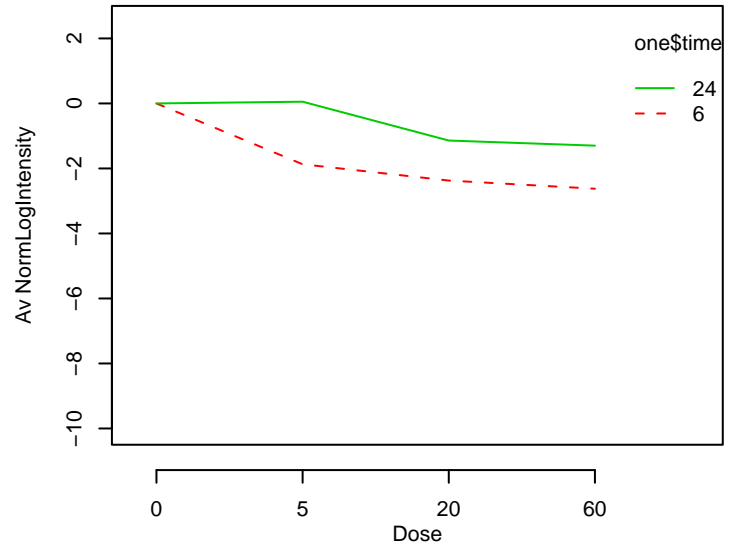

**GO\_0007212 : dopamine receptor signaling pathway**

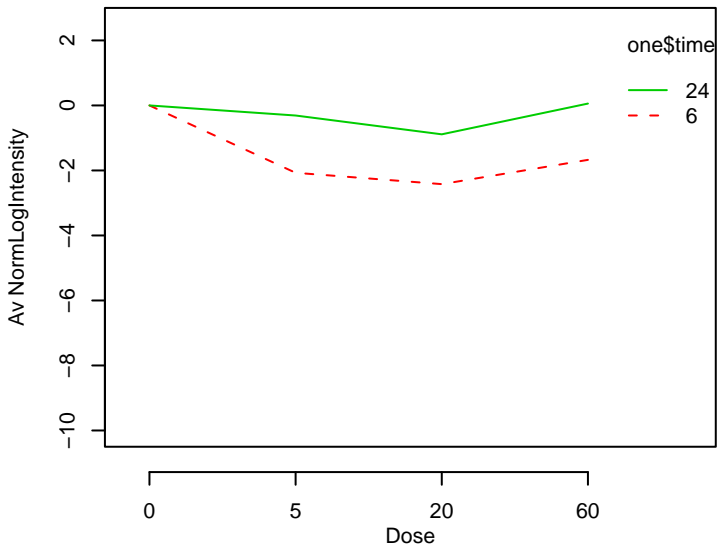

**GO\_0007213 : acetylcholine receptor signaling, muscarinic**

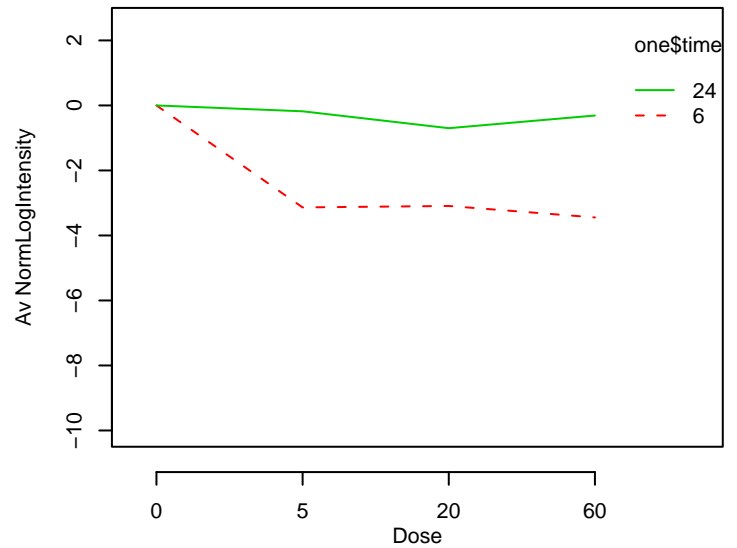



**GO\_0007214 : gamma-aminobutyric acid signaling pathway**

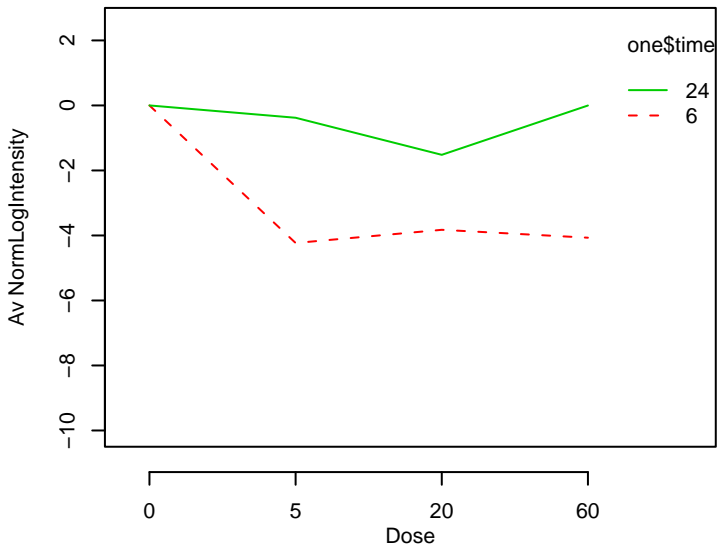

**GO\_0007215 : glutamate signaling pathway**

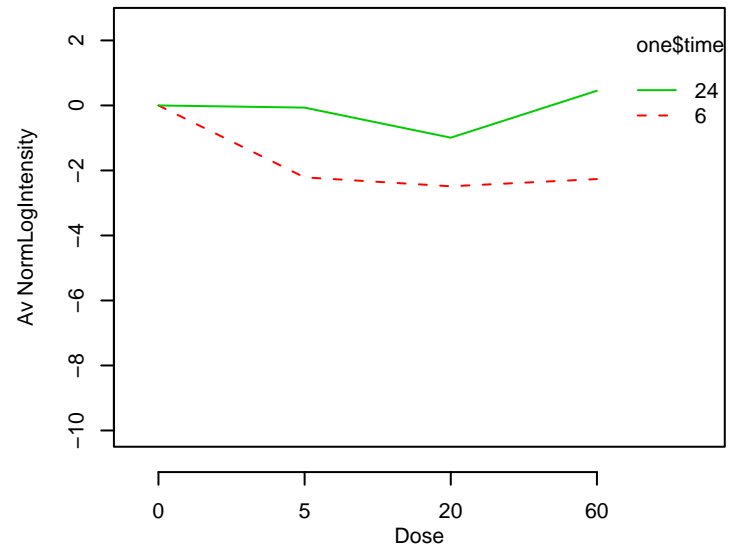

**GO\_0007216 : metabotropic glutamate receptor signaling pathway**

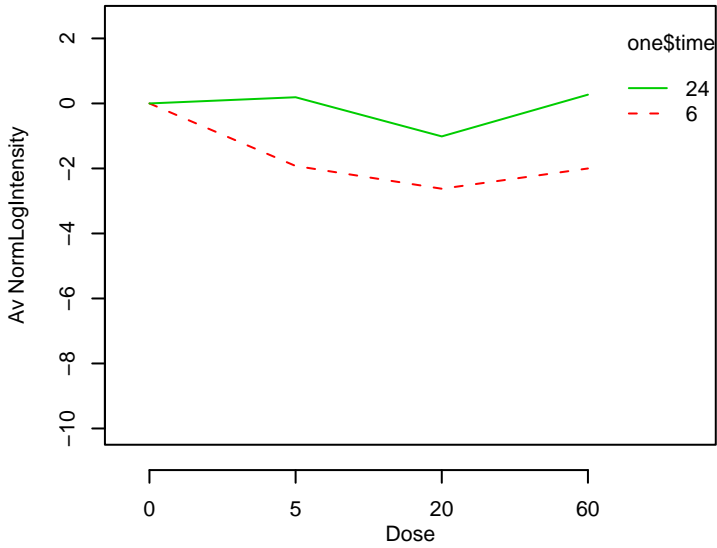

**GO\_0007217 : tachykinin signaling pathway**

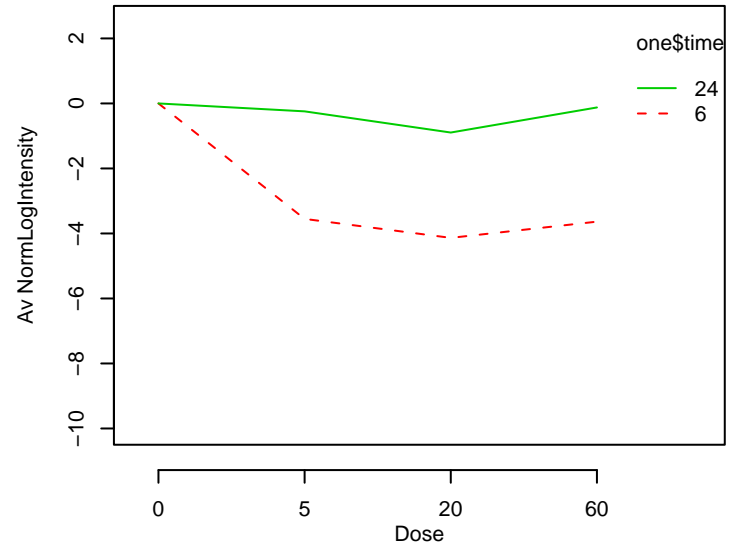

**GO\_0007218 : neuropeptide signaling pathway**

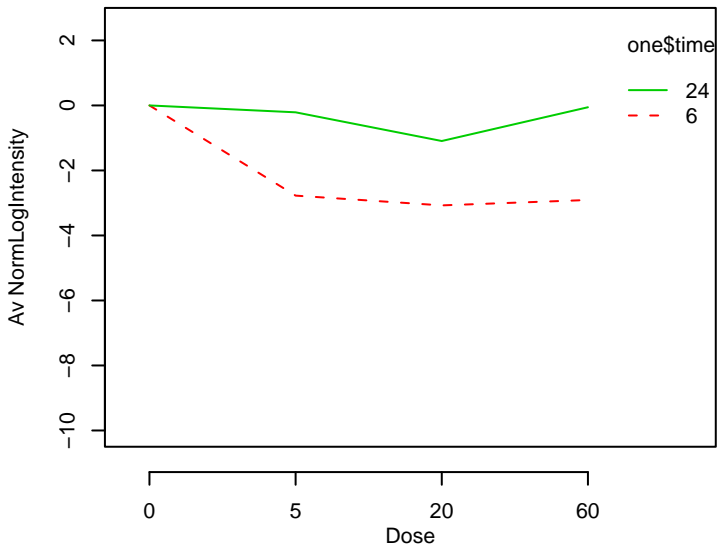

**GO\_0007219 : Notch signaling pathway**

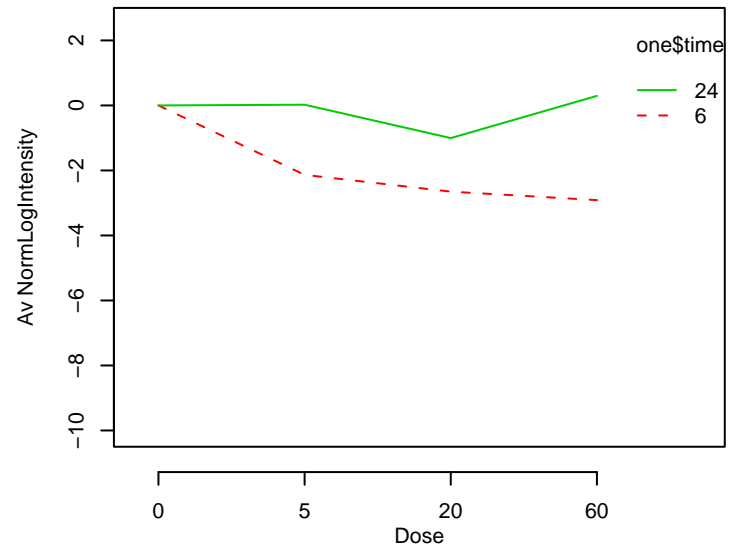

**GO\_0007220 : Notch receptor processing**

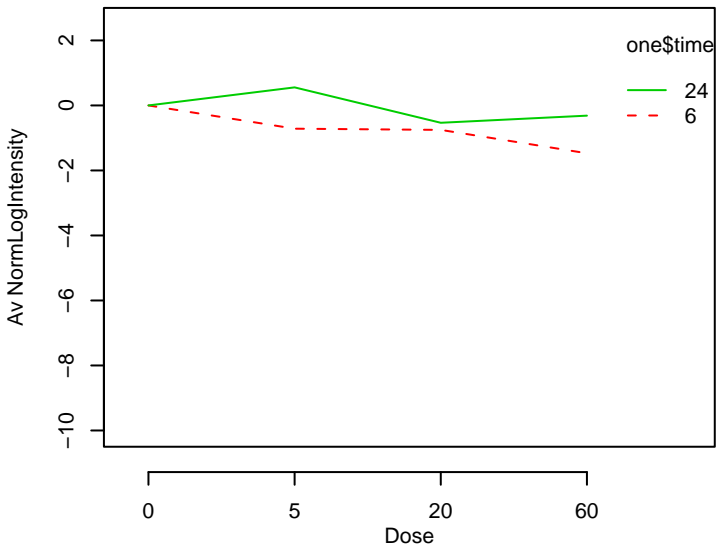

**GO\_0007222 : frizzled signaling pathway**

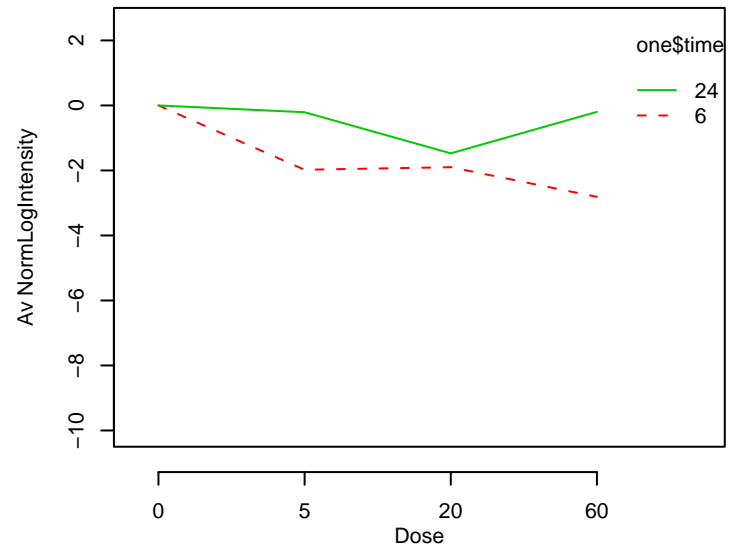

**GO\_0007223 : frizzled-2 signaling pathway**

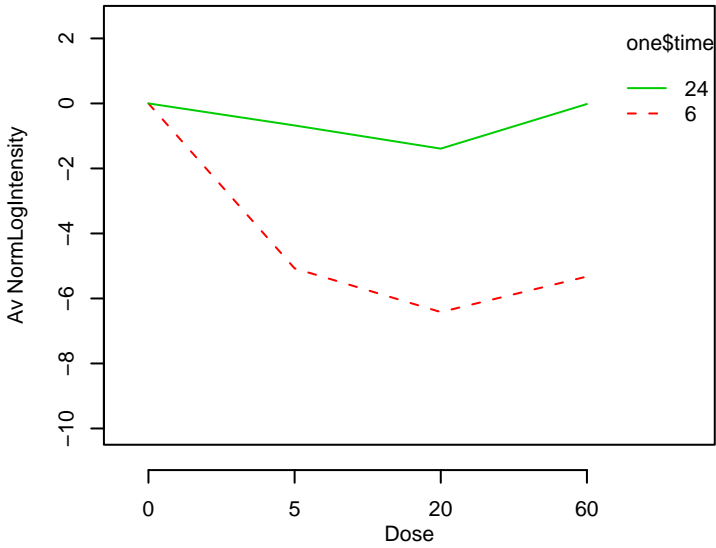

**GO\_0007224 : smoothed signaling pathway**

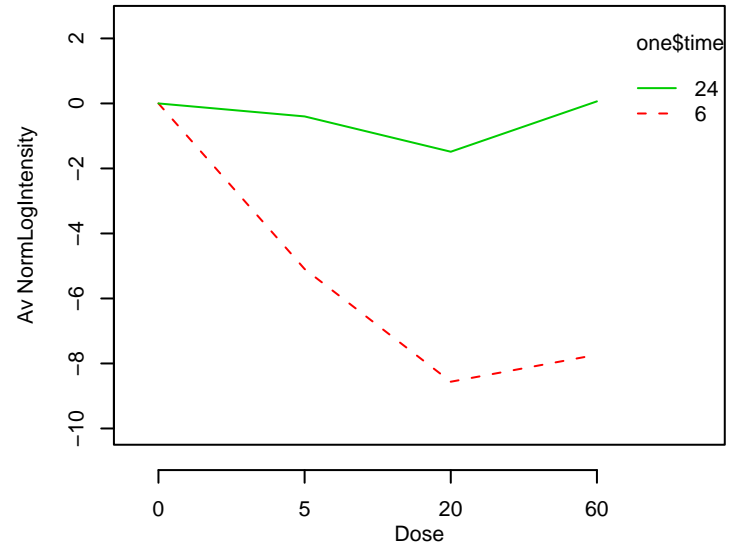

**GO\_0007229 : integrin-mediated signaling pathway**

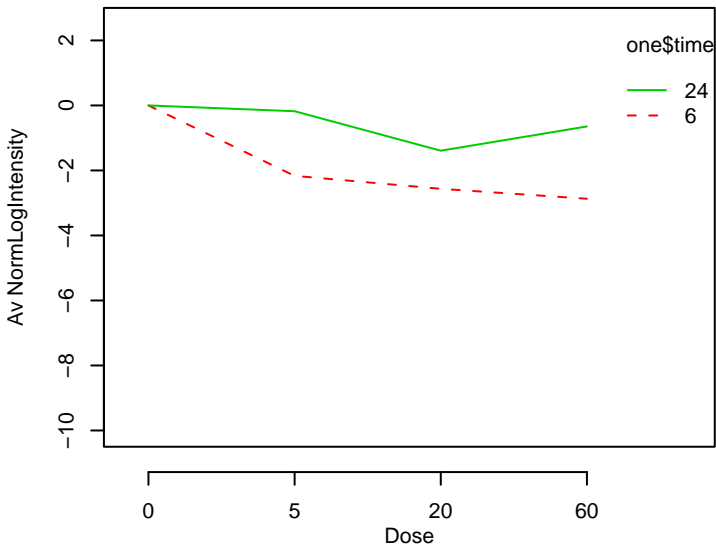

**GO\_0007249 : I-kappaB kinase/NF-kappaB cascade**

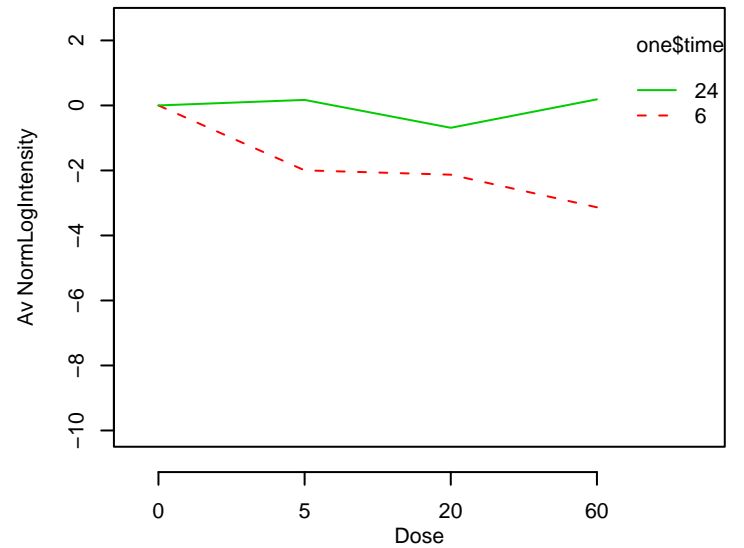

**GO\_0007250 : activation of NF-kappaB-inducing kinase**

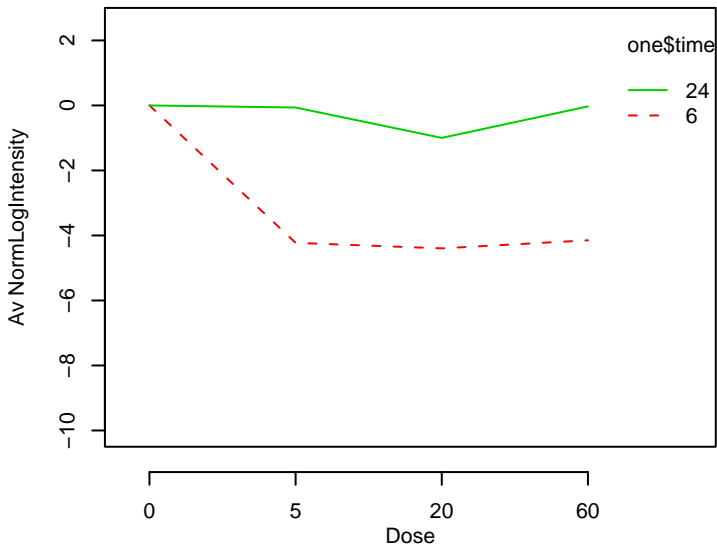

**GO\_0007253 : cytoplasmic sequestering of NF-kappaB**

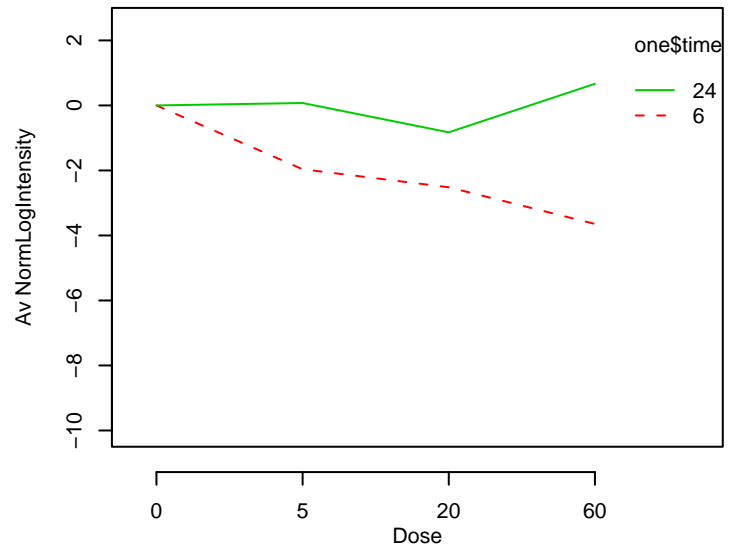

**GO\_0007254 : JNK cascade**

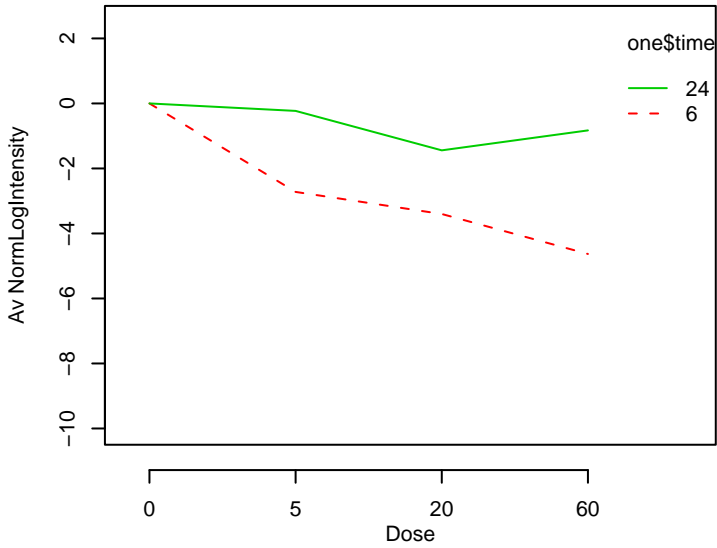

**GO\_0007257 : activation of JNK activity**

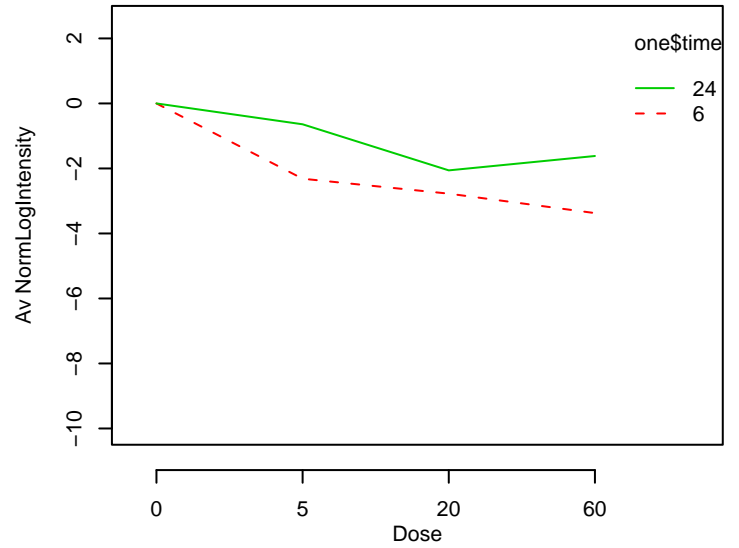

**GO\_0007259 : JAK-STAT cascade**

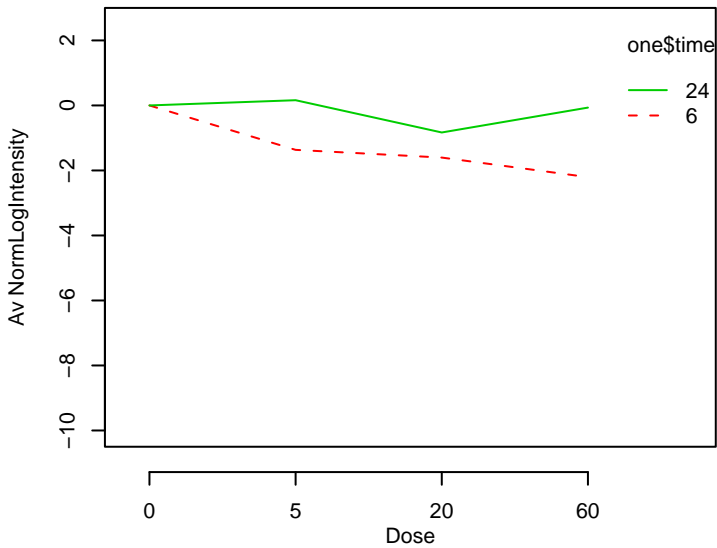

**GO\_0007260 : tyrosine phosphorylation of STAT protein**

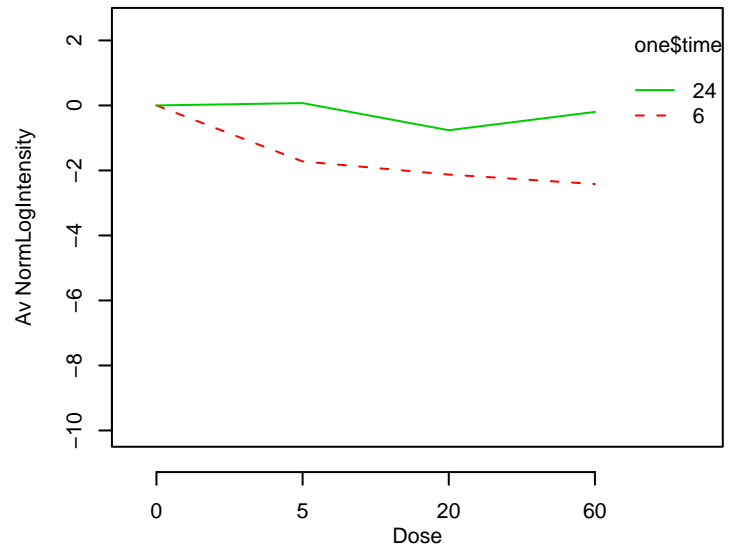

**GO\_0007263 : nitric oxide mediated signal transduction**

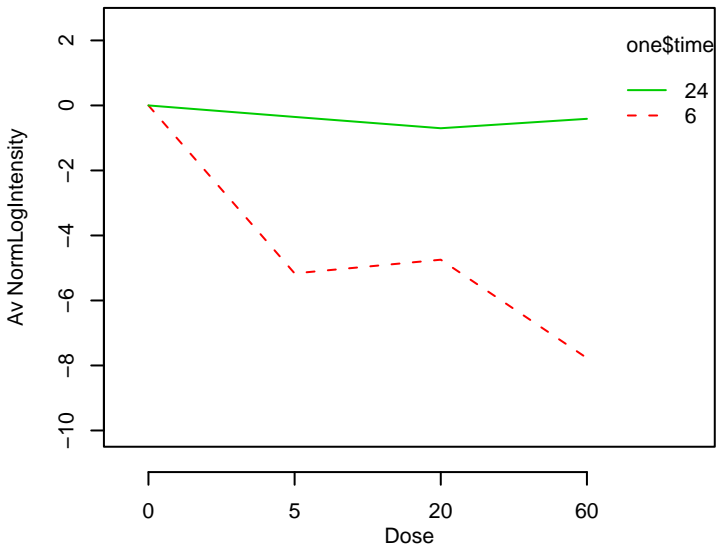

**GO\_0007265 : Ras protein signal transduction**

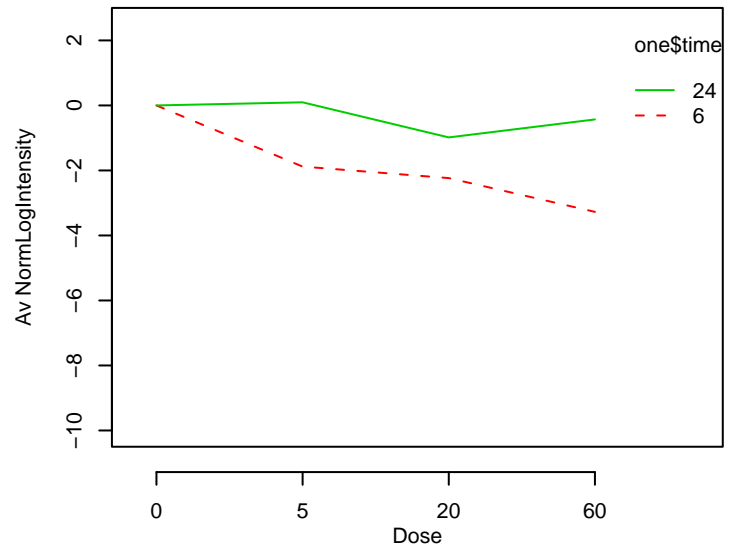

**GO\_0007266 : Rho protein signal transduction**

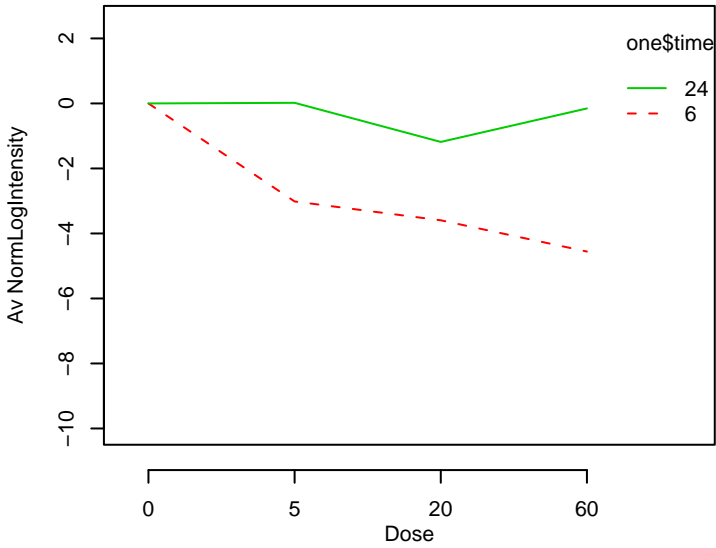

**GO\_0007269 : neurotransmitter secretion**

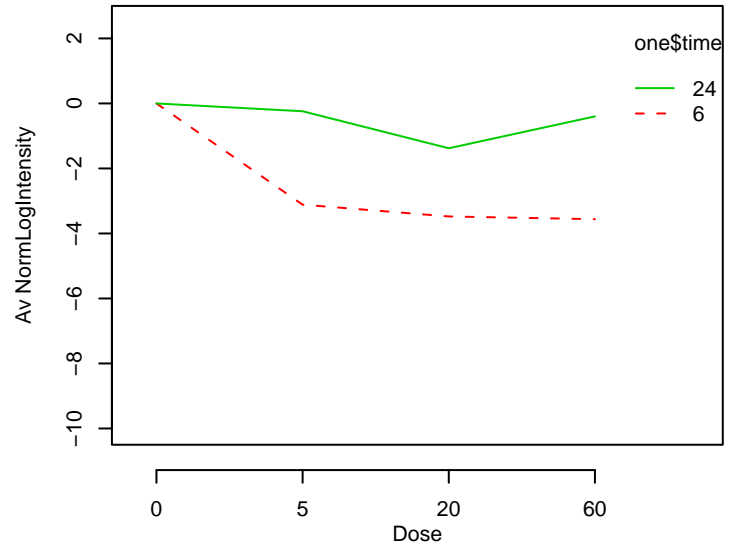

**GO\_0007270 : nerve-nerve synaptic transmission**

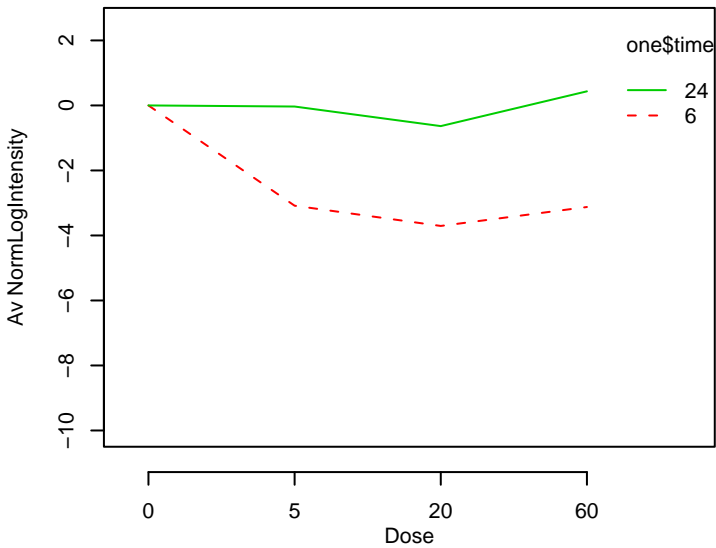

**GO\_0007271 : synaptic transmission\, cholinergic**

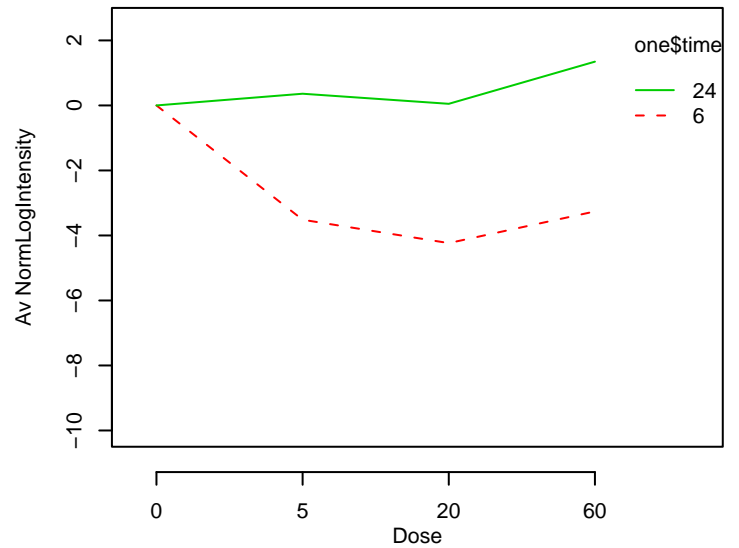

**GO\_0007272 : ensheathment of neurons**

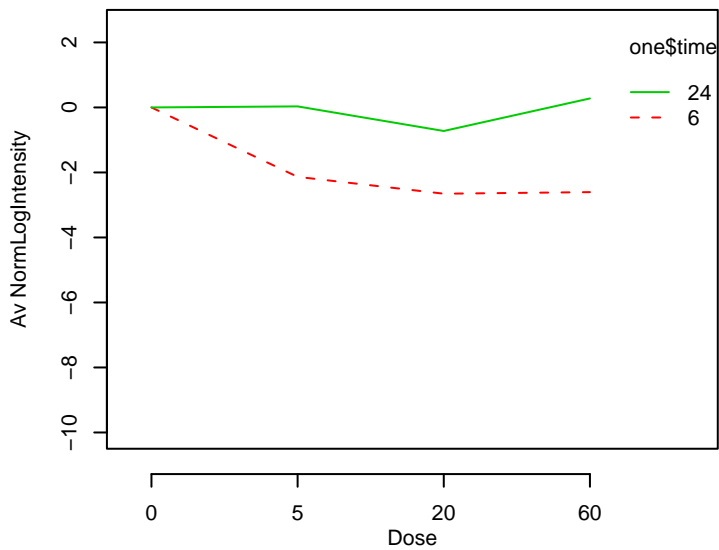

**GO\_0007274 : neuromuscular synaptic transmission**

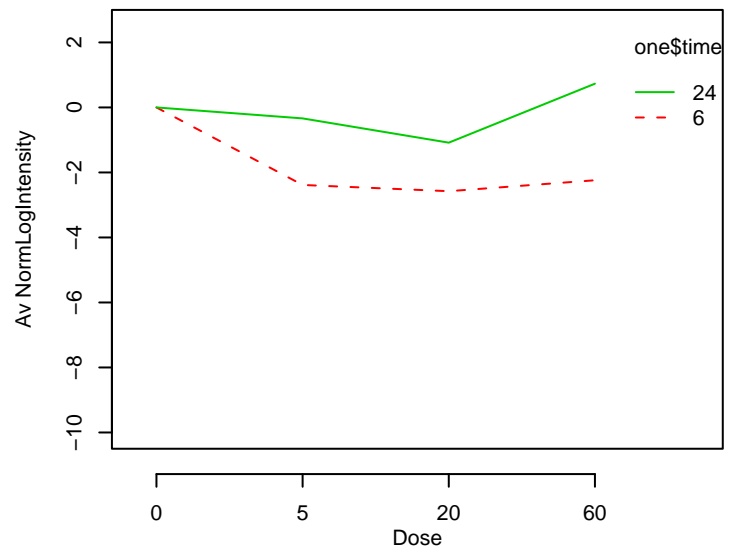

**GO\_0007276 : gametogenesis**

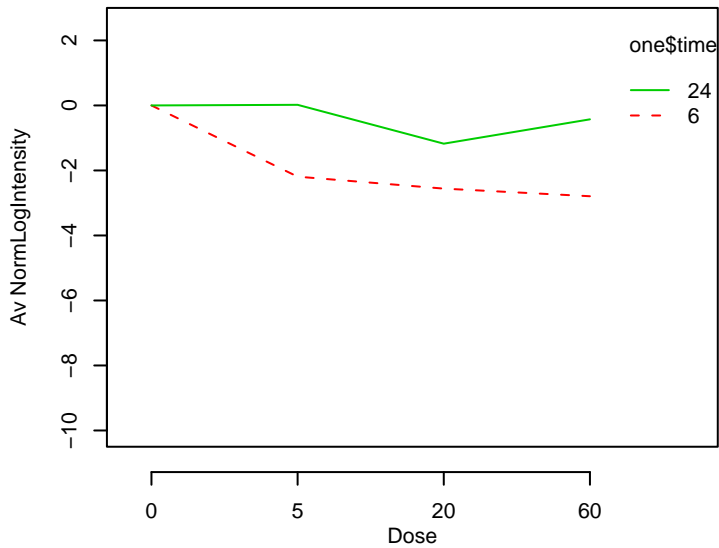

**GO\_0007281 : germ cell development**

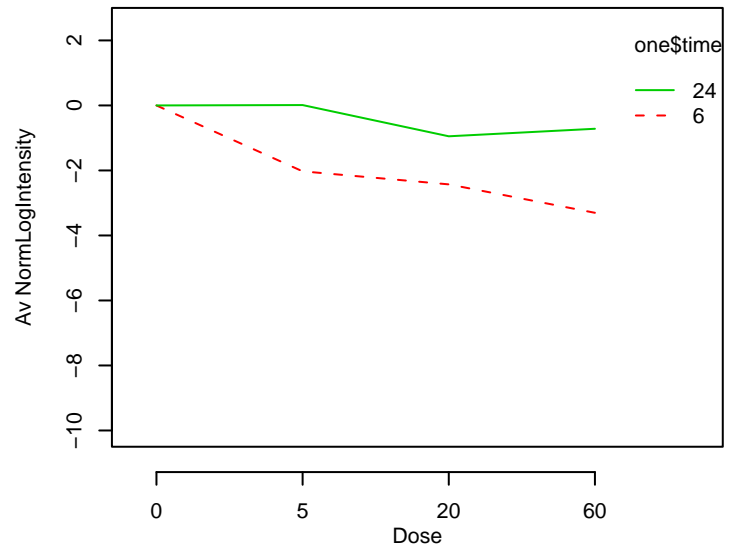

**GO\_0007283 : spermatogenesis**

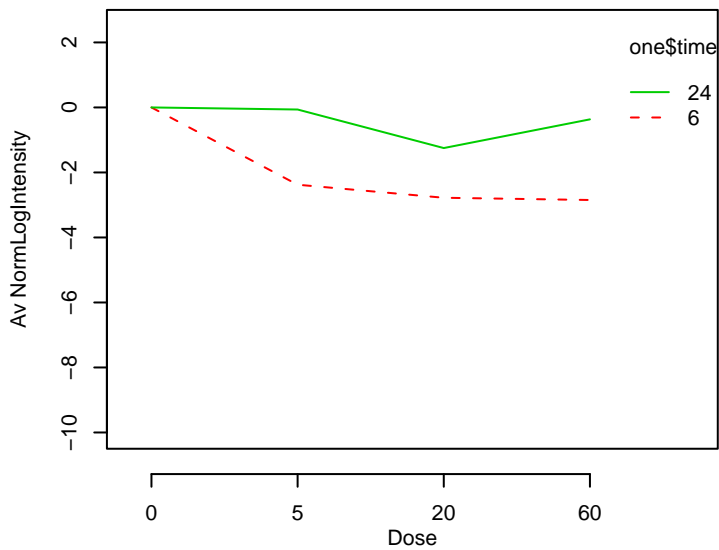

**GO\_0007286 : spermatid development**

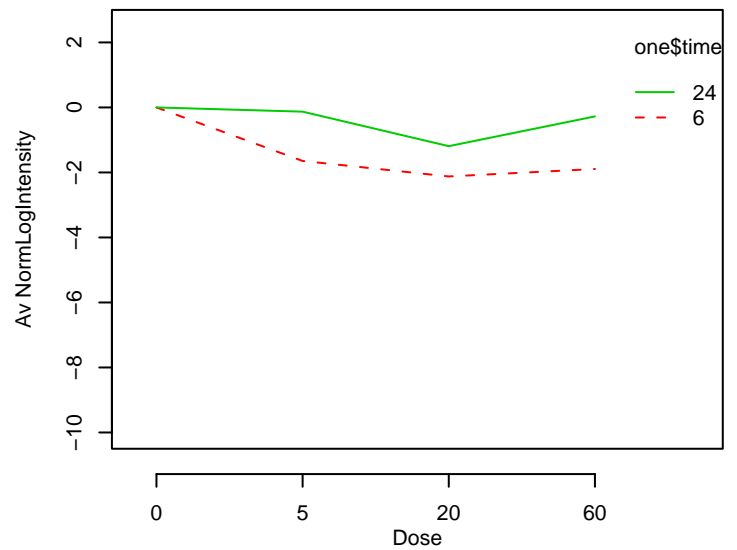

**GO\_0007292 : female gamete generation**

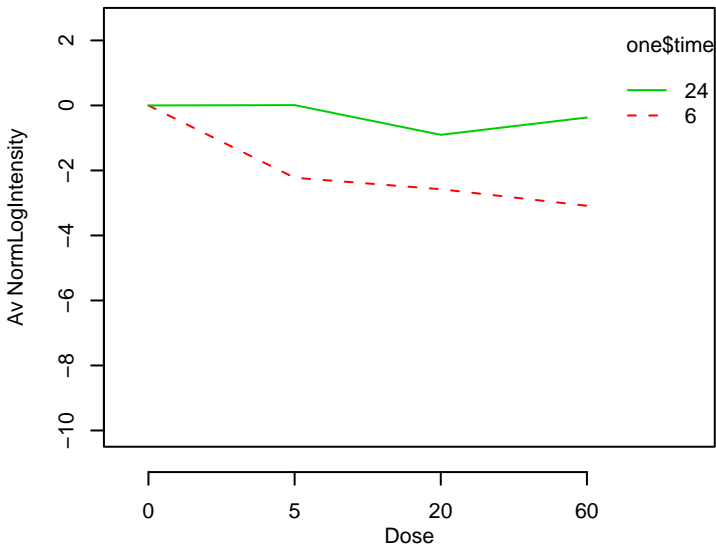

**GO\_0007338 : fertilization (sensu Metazoa)**

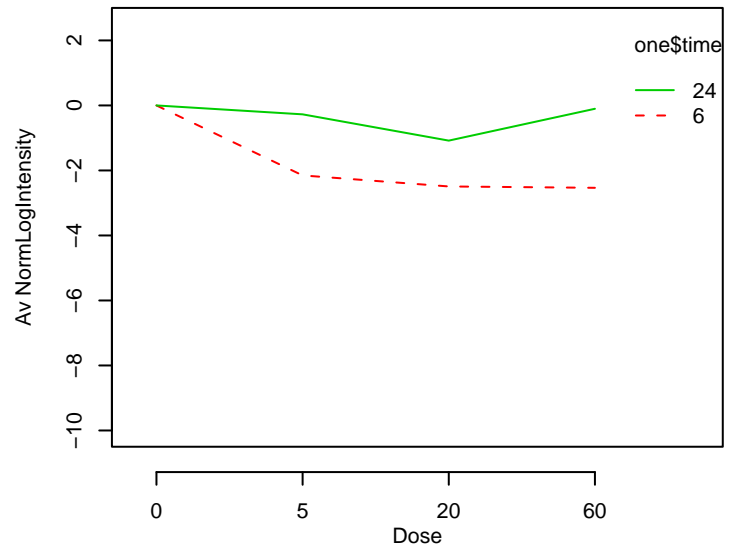

**GO\_0007339 : binding of sperm to zona pellucida**

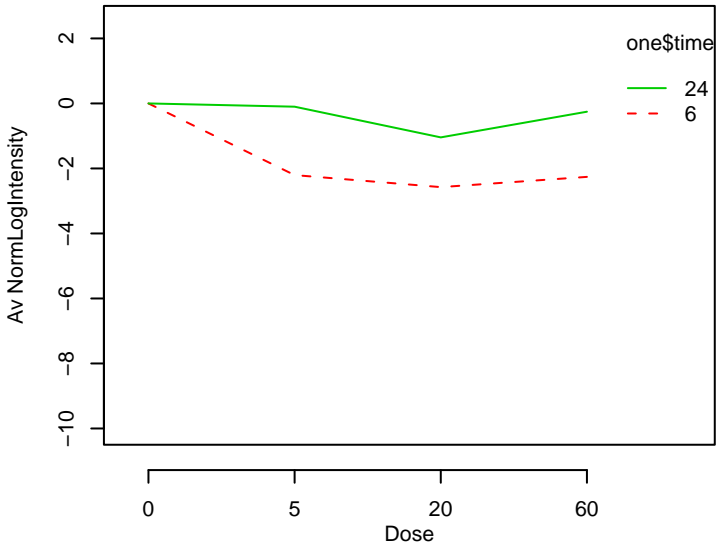

**GO\_0007340 : acrosome reaction**

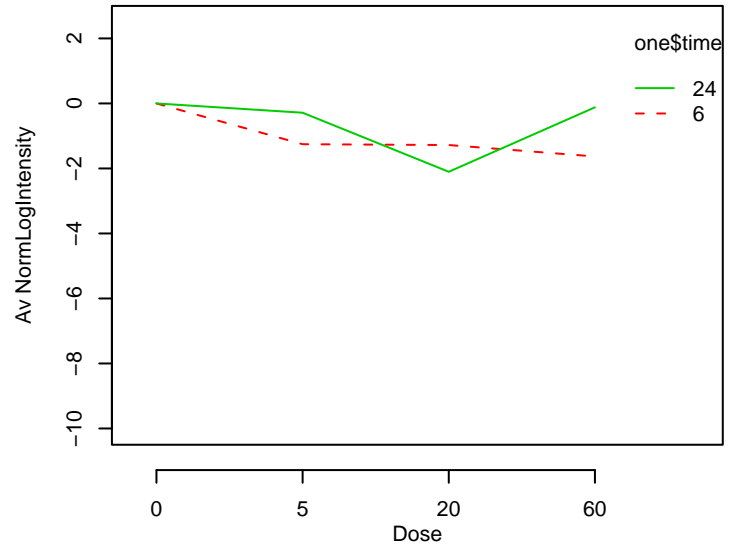

**GO\_0007342 : fusion of sperm to egg plasma membrane GO\_0007346 : regulation of progression through mitotic cell**

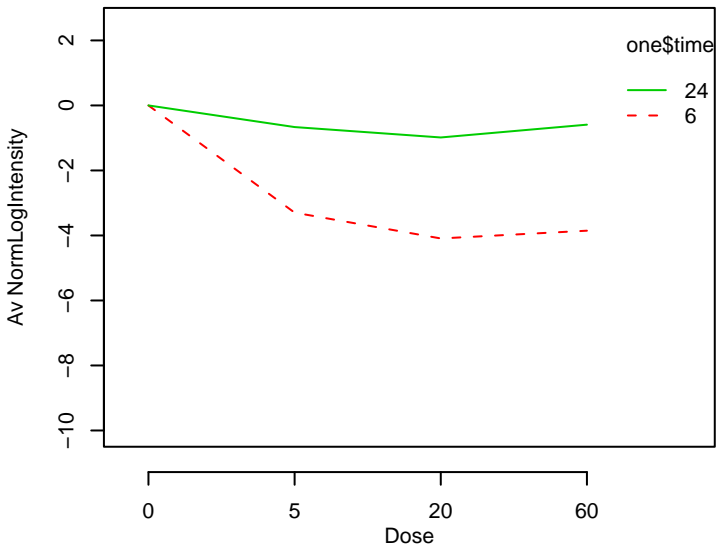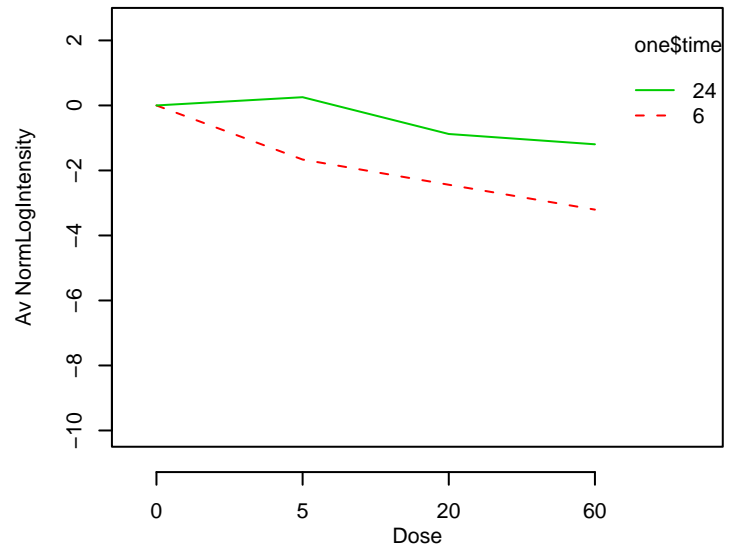

**GO\_0007350 : blastoderm segmentation**

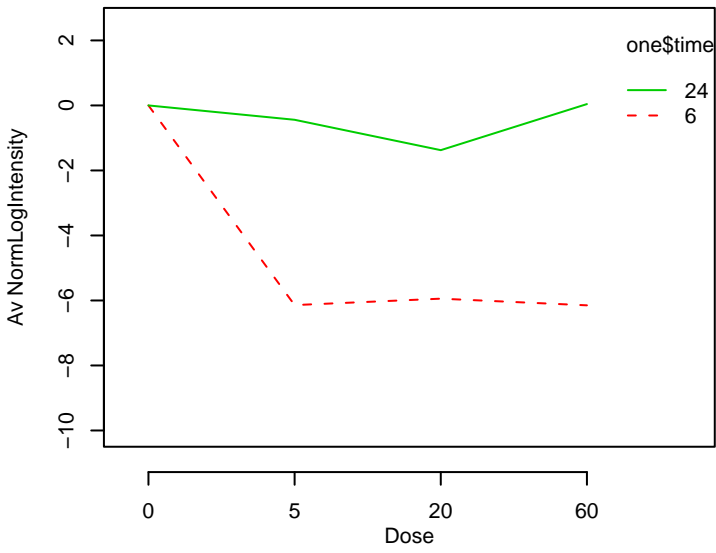

**GO\_0007351 : regional subdivision**

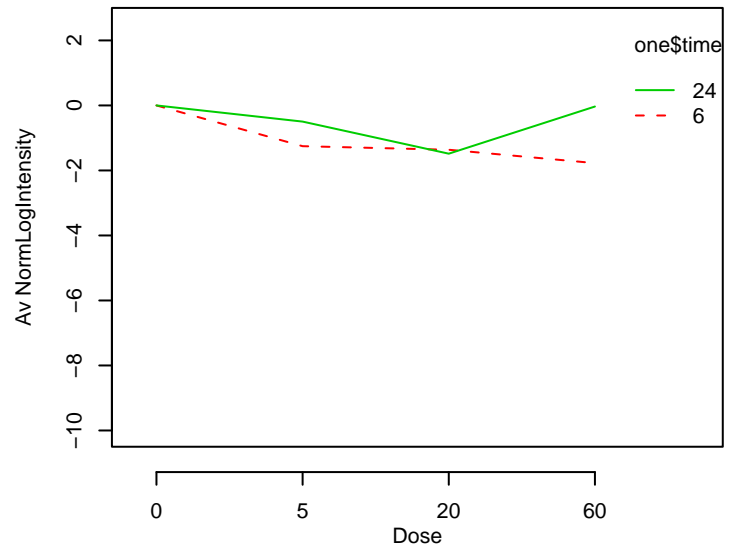

**GO\_0007368 : determination of left/right symmetry**

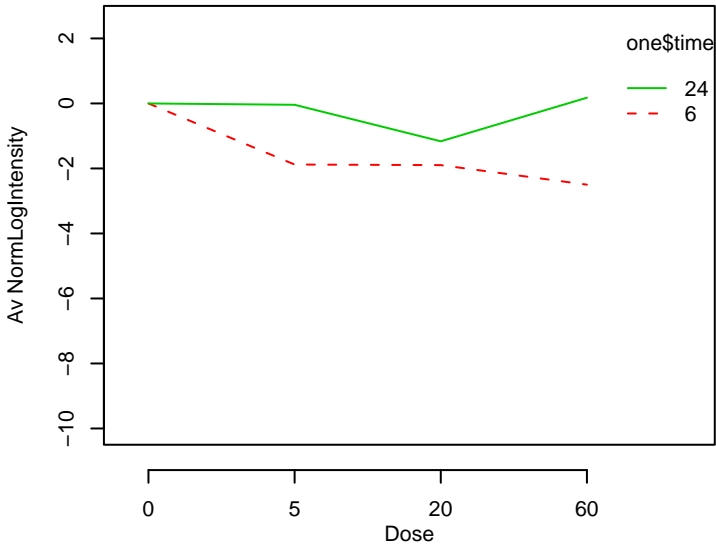

**GO\_0007369 : gastrulation**

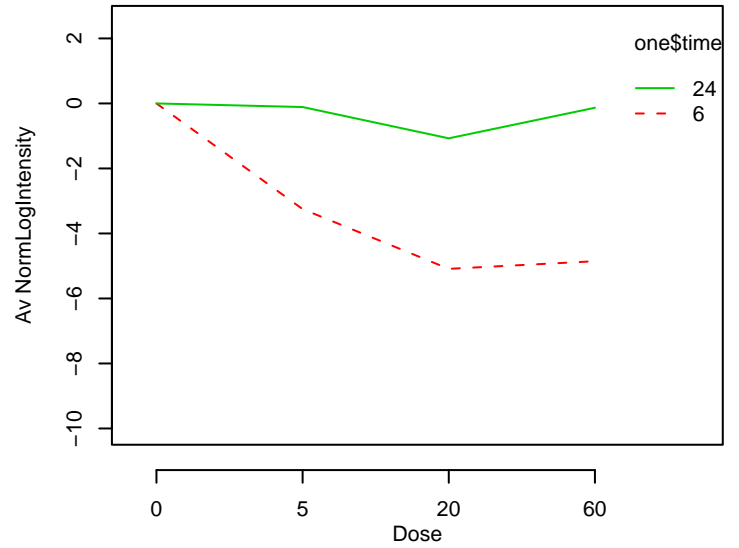

**GO\_0007379 : segment specification**

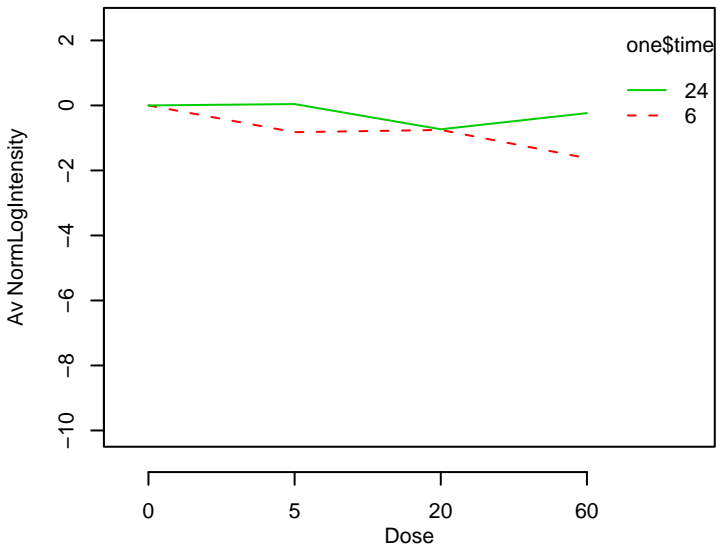

**GO\_0007386 : compartment specification**

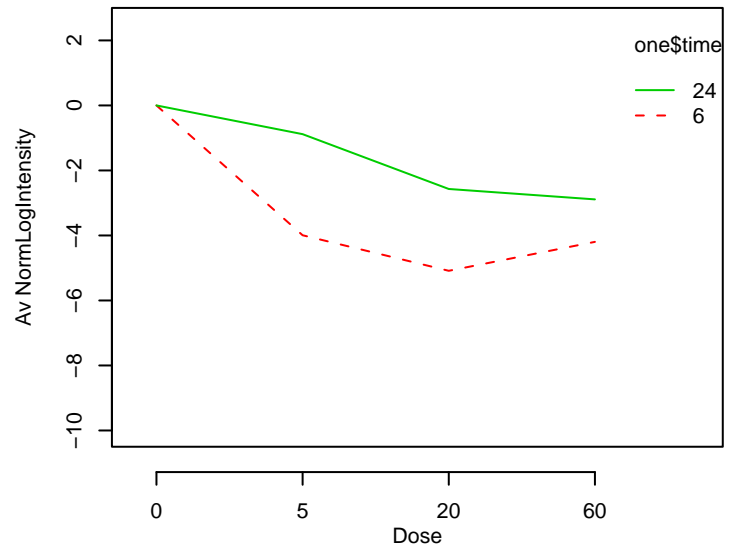

**GO\_0007389 : pattern specification**

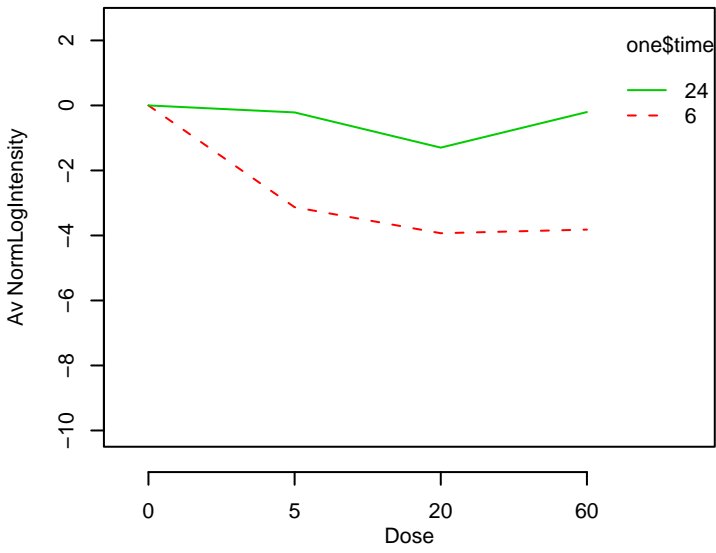

**GO\_0007398 : ectoderm development**

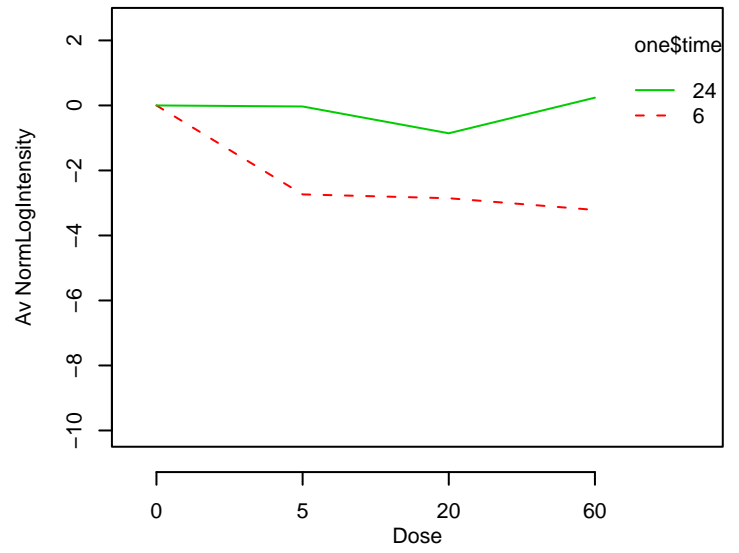

**GO\_0007405 : neuroblast proliferation**

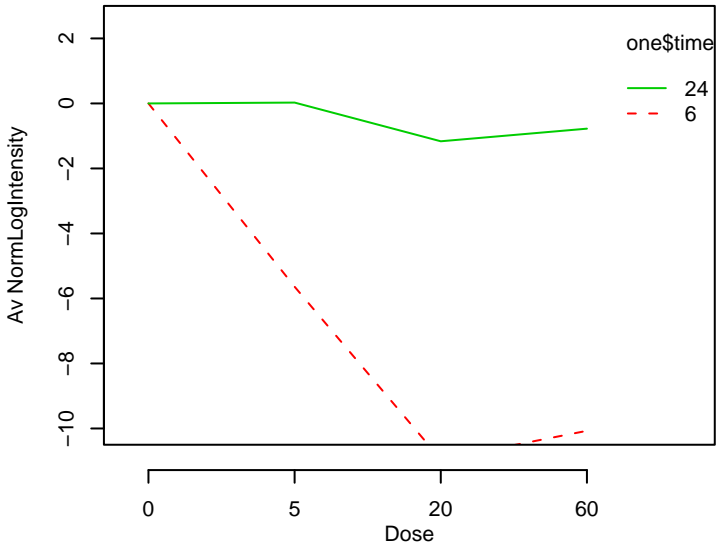

**GO\_0007409 : axonogenesis**

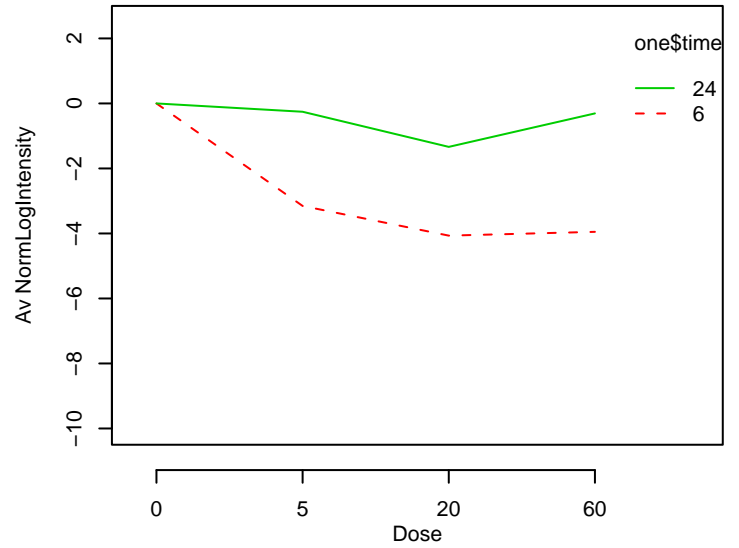

**GO\_0007411 : axon guidance**

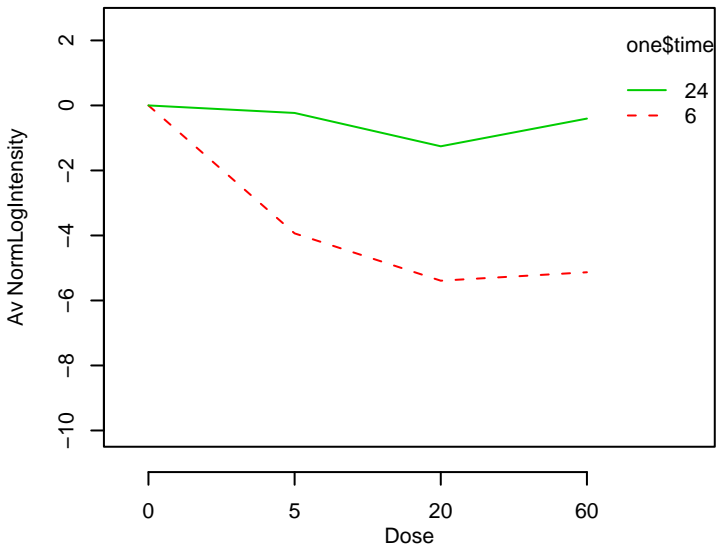

**GO\_0007413 : axonal fasciculation**

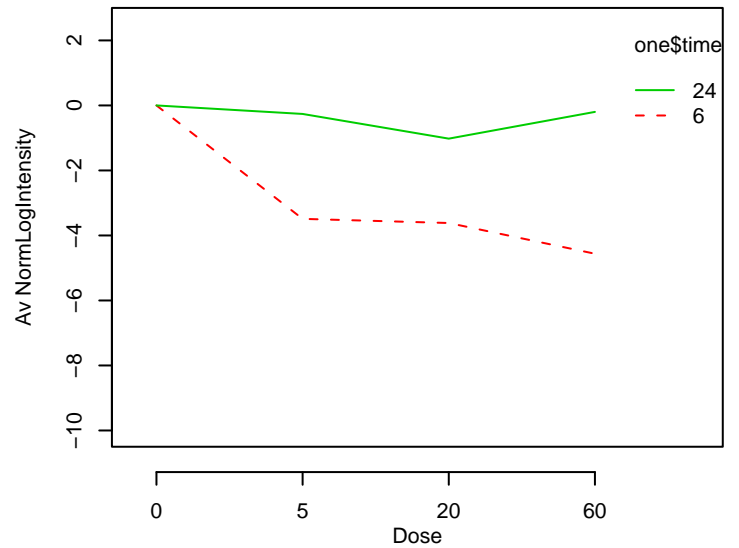



**GO\_0007416 : synaptogenesis**

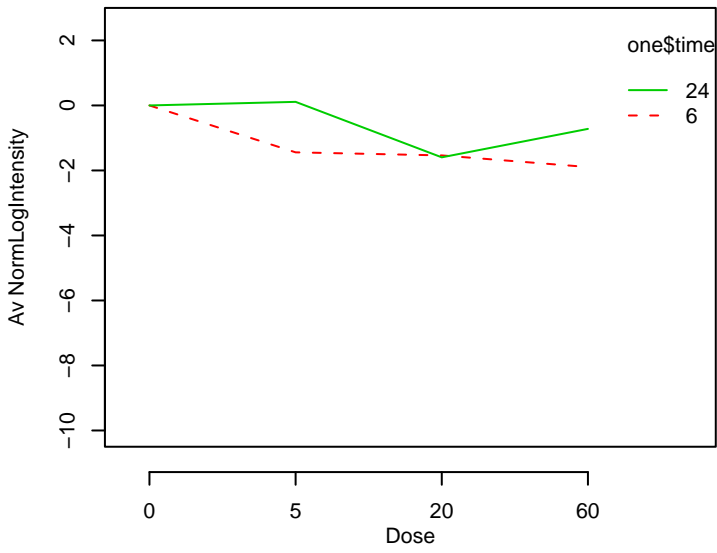

**GO\_0007417 : central nervous system development**

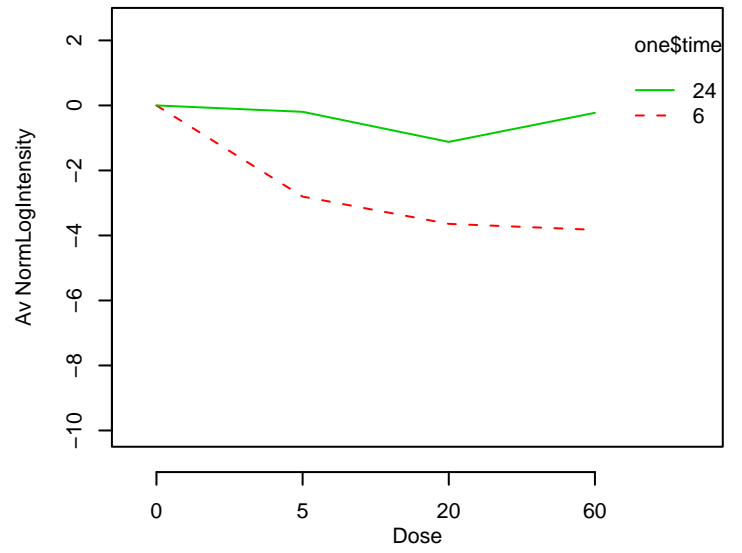

**GO\_0007420 : brain development**

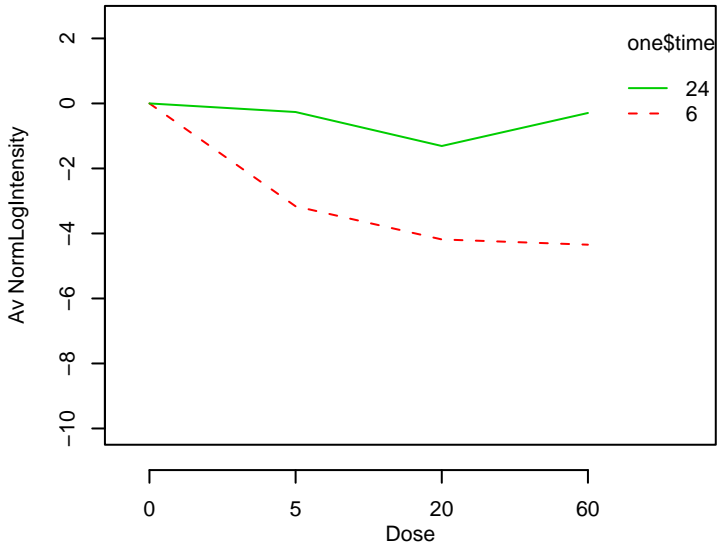

**GO\_0007422 : peripheral nervous system development**

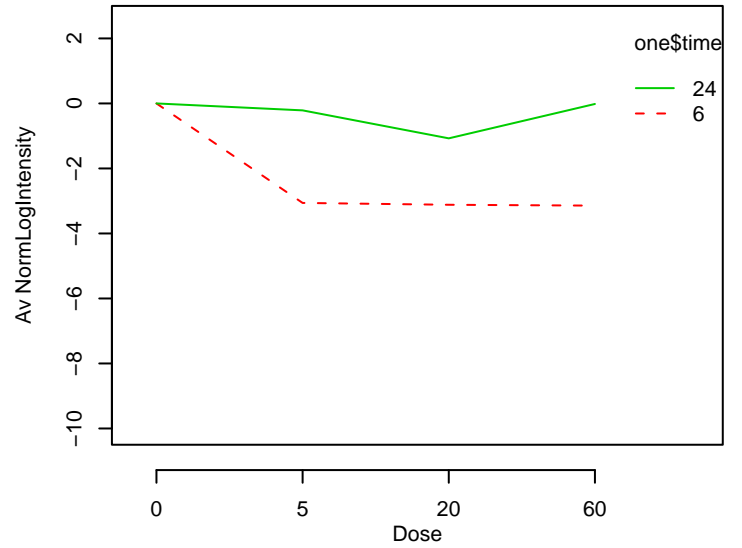

**GO\_0007423 : sensory organ development**

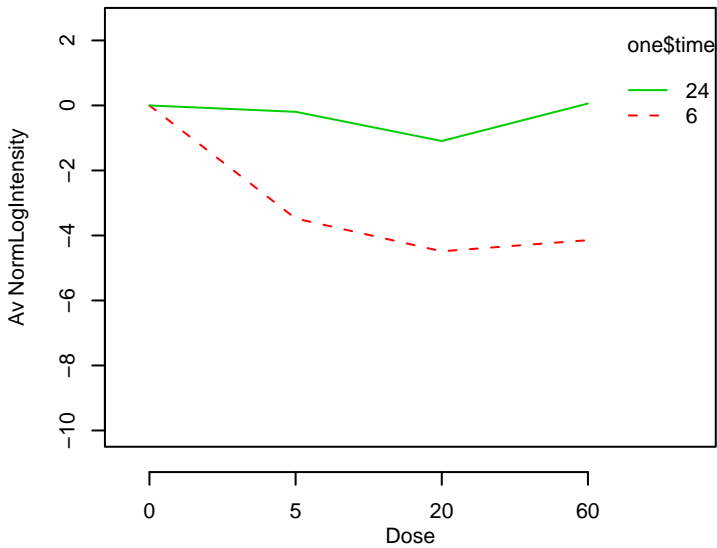

**GO\_0007431 : salivary gland development**

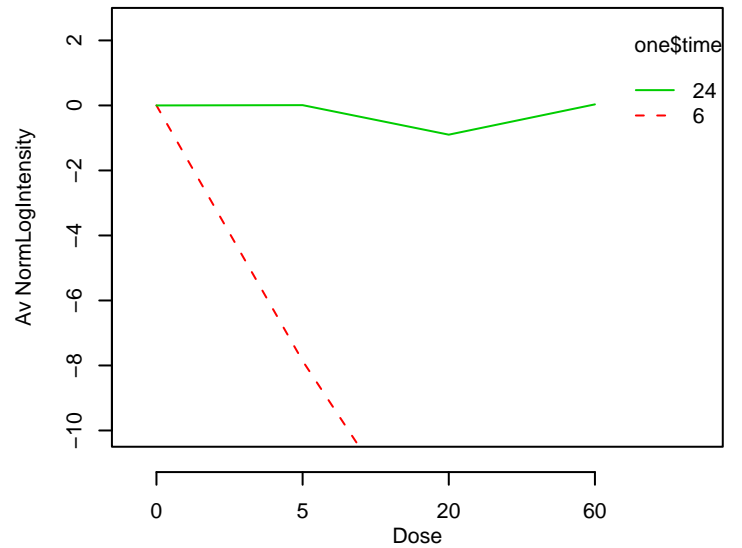

**GO\_0007435 : salivary gland morphogenesis**

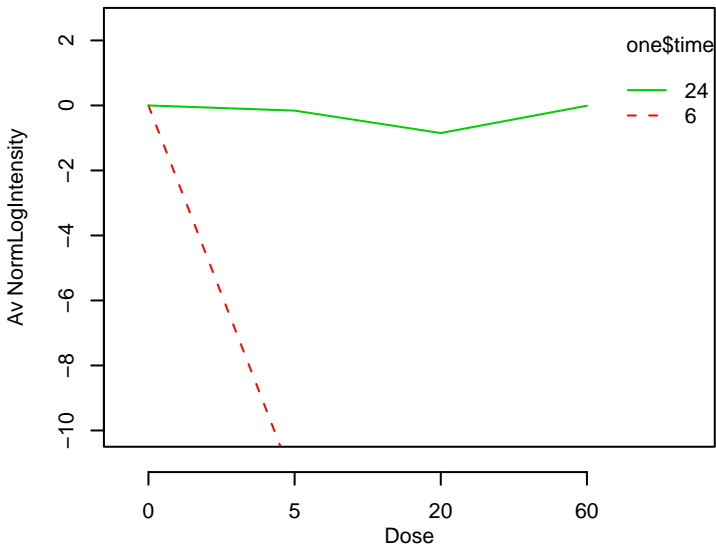

**GO\_0007439 : ectodermal gut development**

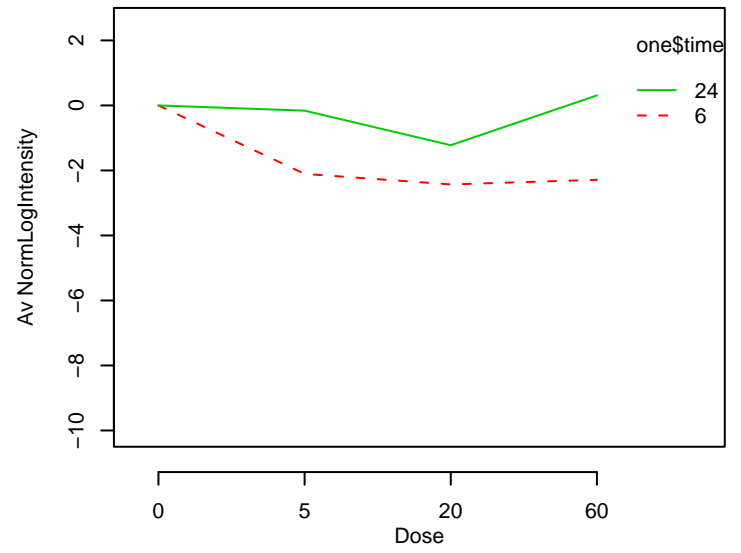

**GO\_0007492 : endoderm development**

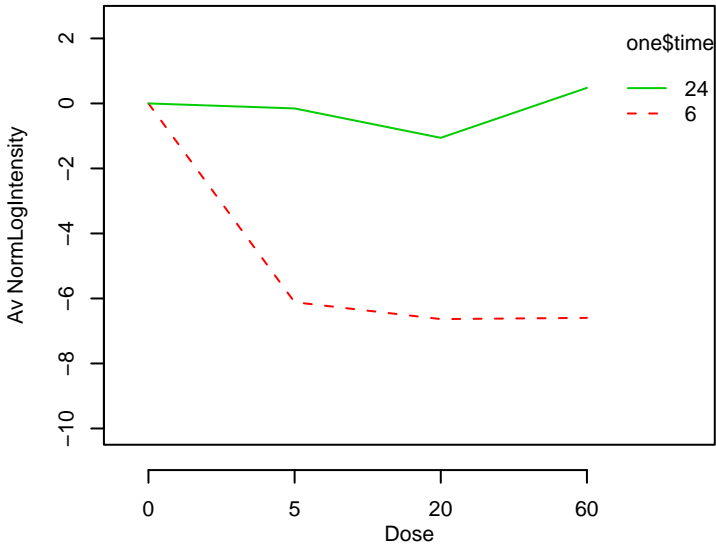

**GO\_0007498 : mesoderm development**

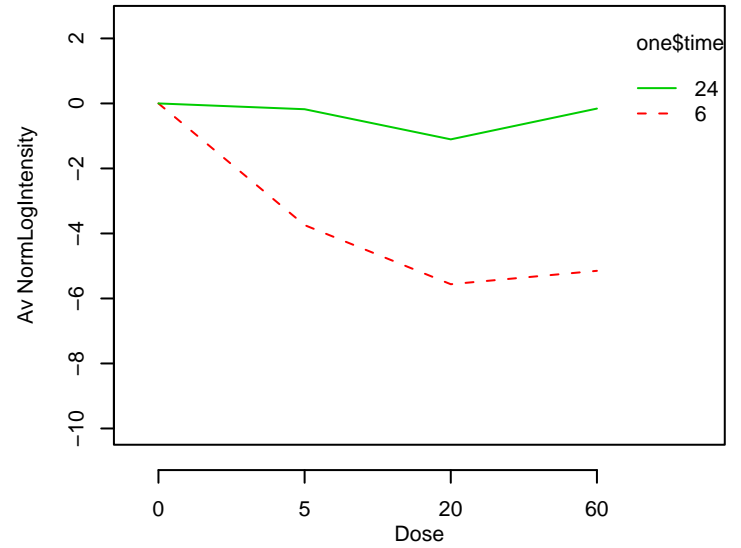

**GO\_0007507 : heart development**

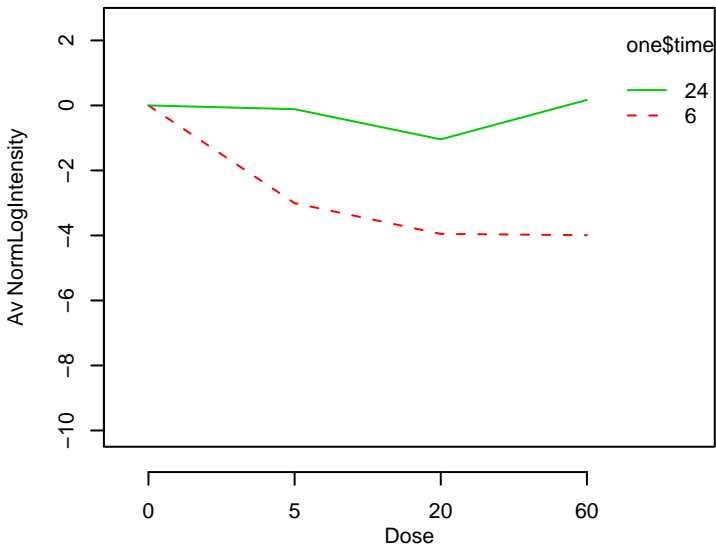

**GO\_0007512 : adult heart development**

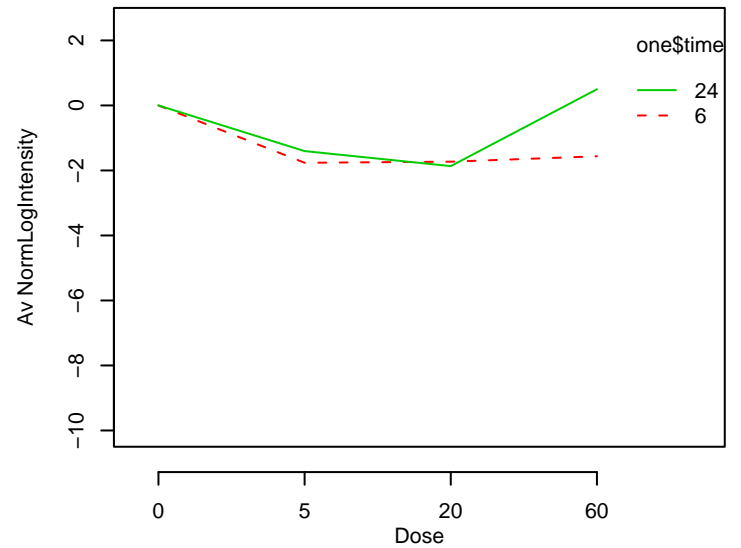

**GO\_0007516 : hemocyte development (sensu Arthropoda)**

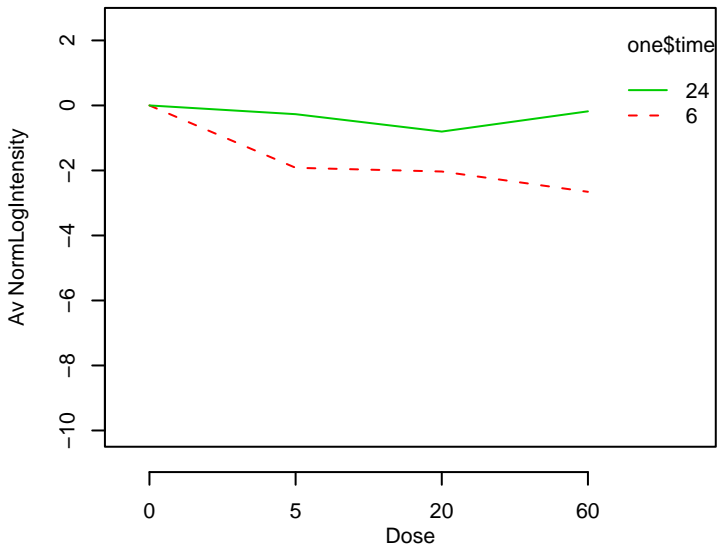

**GO\_0007517 : muscle development**

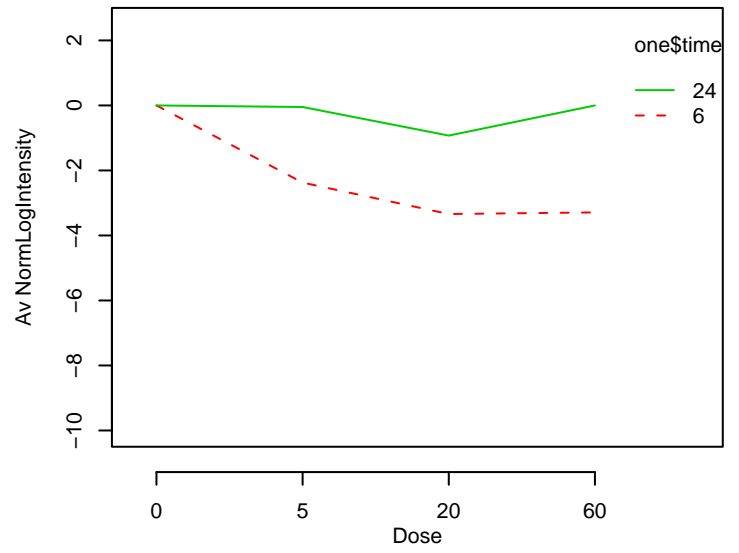

**GO\_0007519 : striated muscle development**

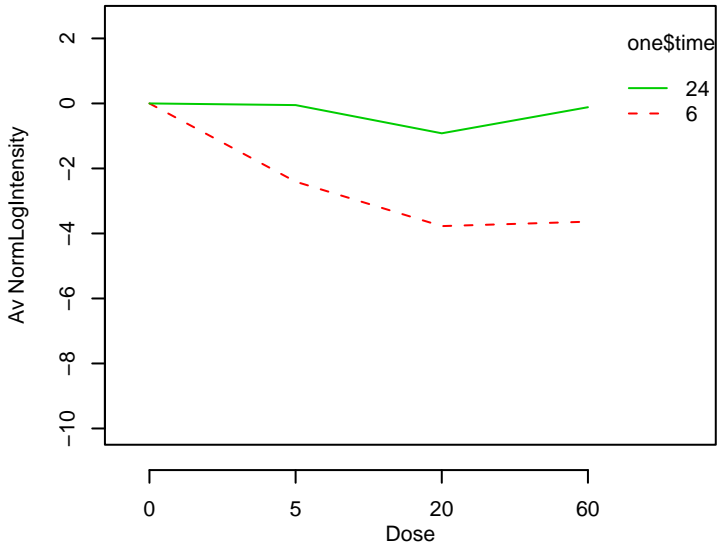

**GO\_0007520 : myoblast fusion**

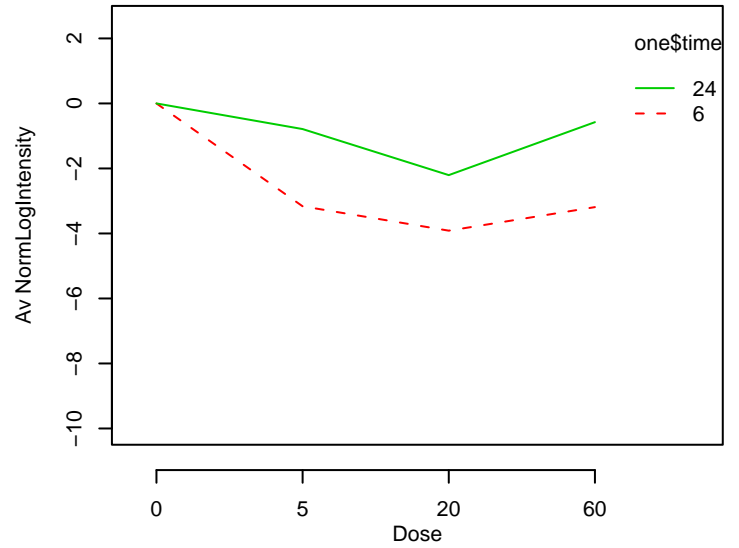

**GO\_0007528 : neuromuscular junction development**

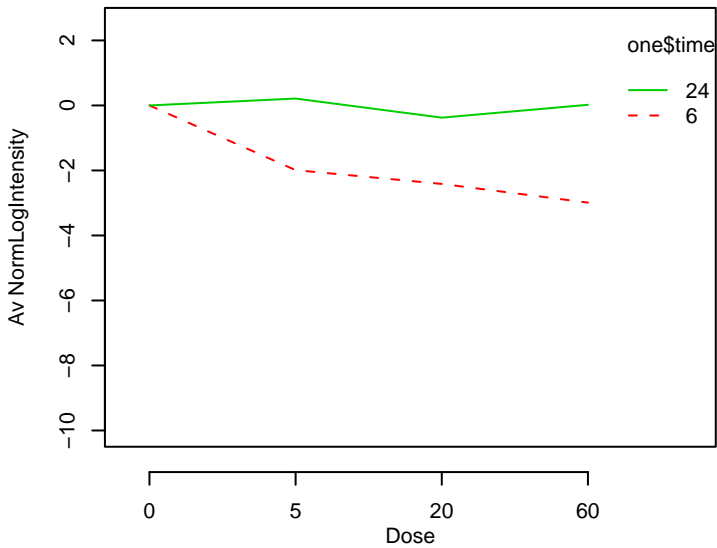

**GO\_0007530 : sex determination**

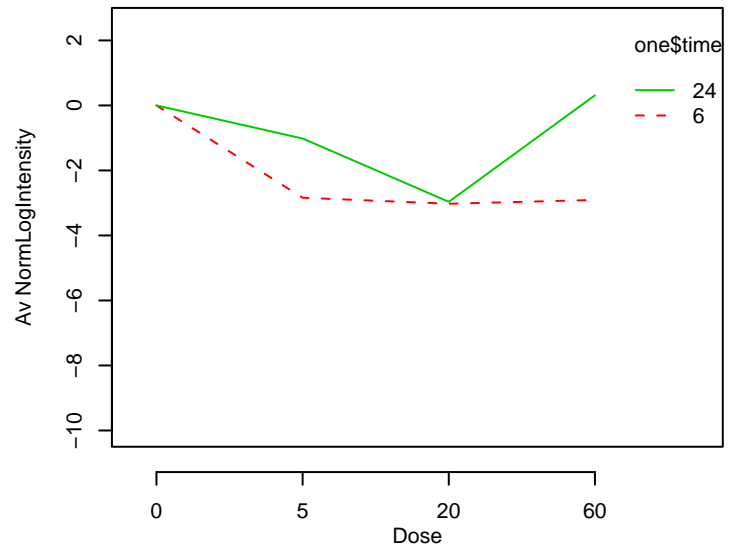

**GO\_0007548 : sex differentiation**

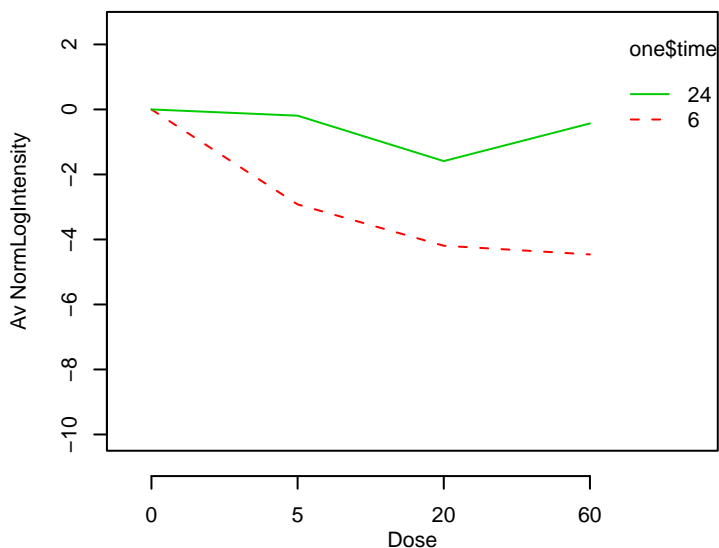

**GO\_0007565 : pregnancy**

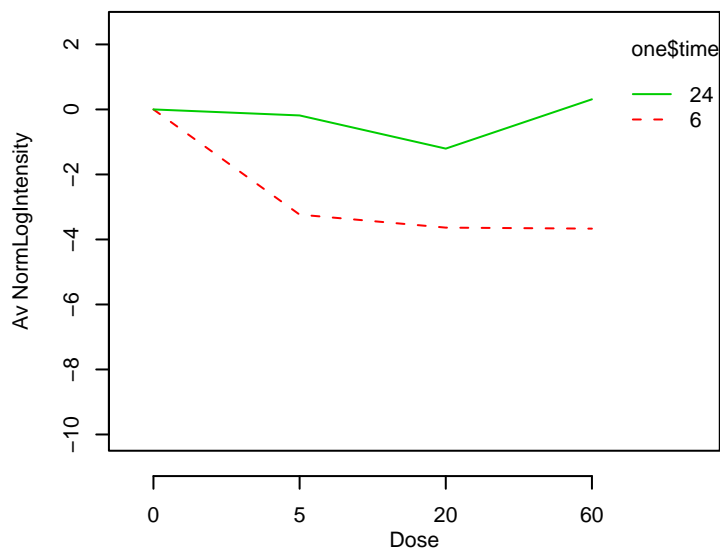

**GO\_0007566 : embryo implantation**

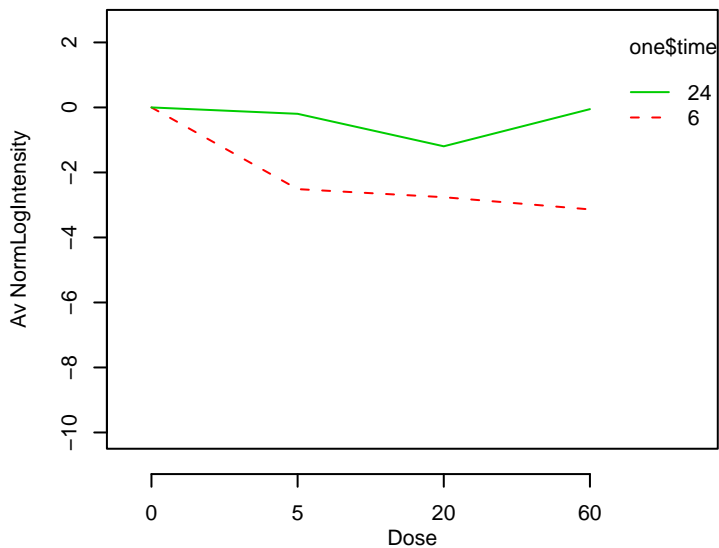

**GO\_0007567 : parturition**

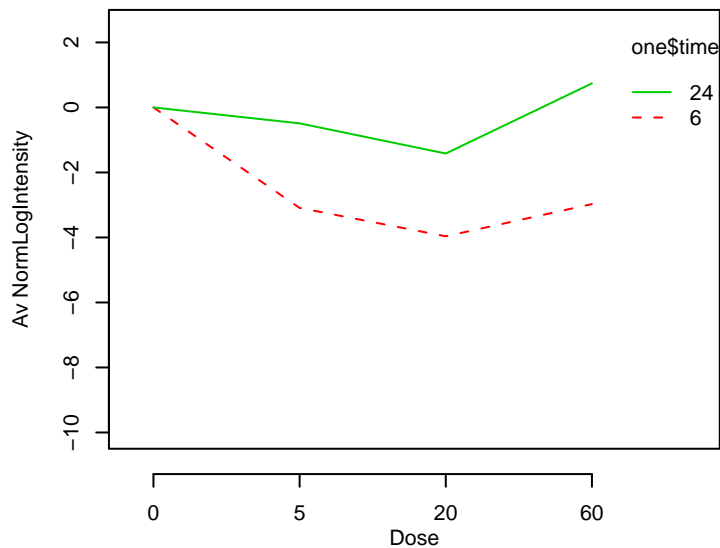

**GO\_0007568 : aging**

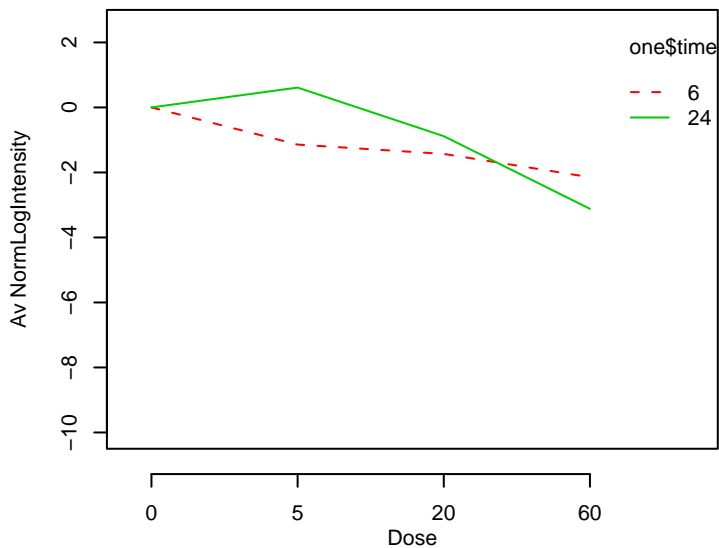

**GO\_0007569 : cell aging**

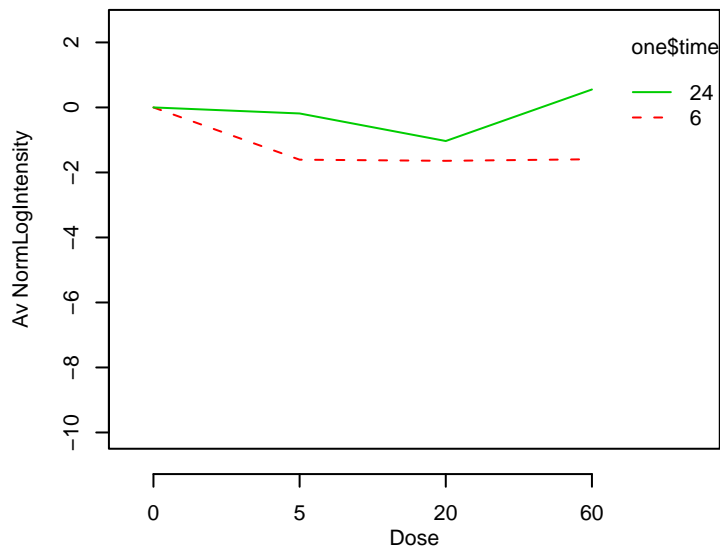

**GO\_0007584 : response to nutrient**

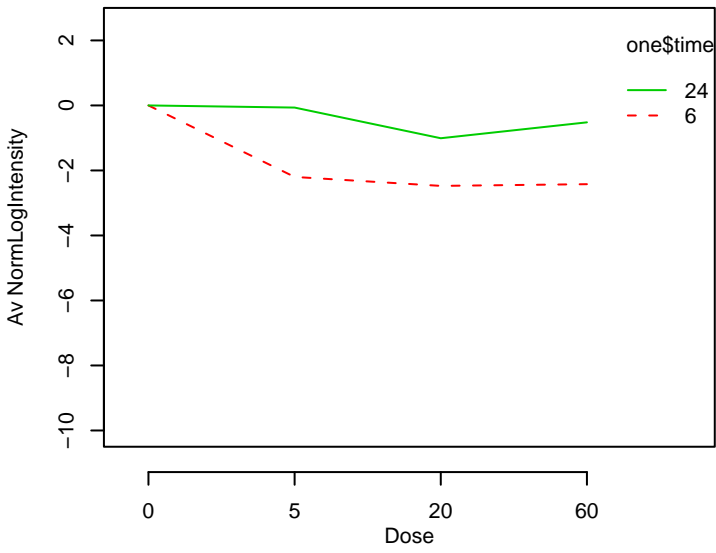

**GO\_0007585 : respiratory gaseous exchange**

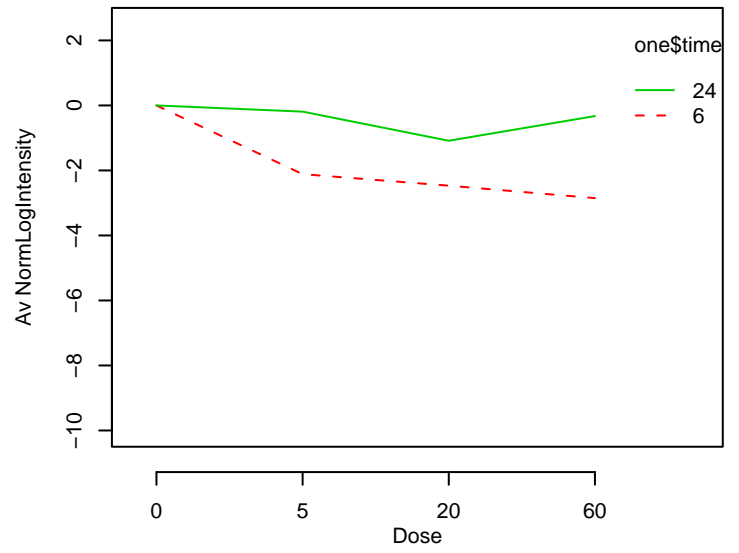

**GO\_0007586 : digestion**

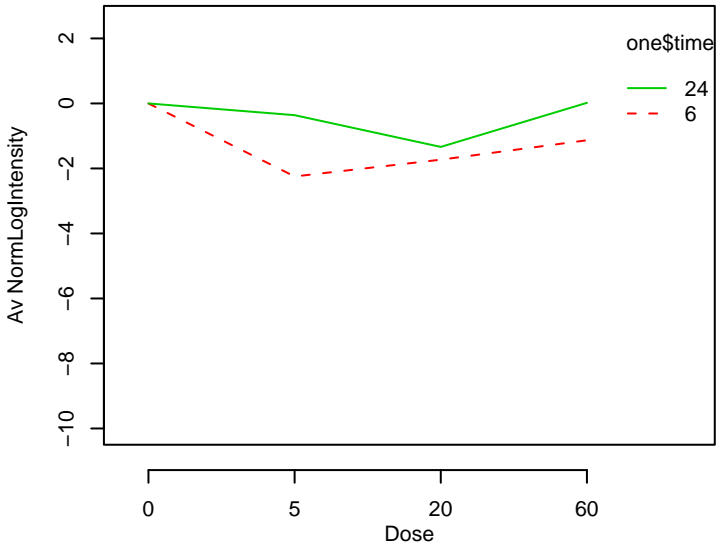

**GO\_0007588 : excretion**

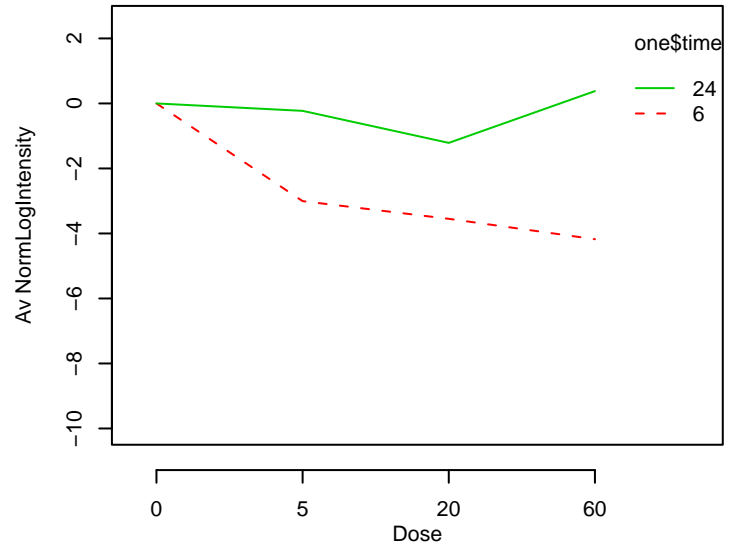

**GO\_0007589 : fluid secretion**

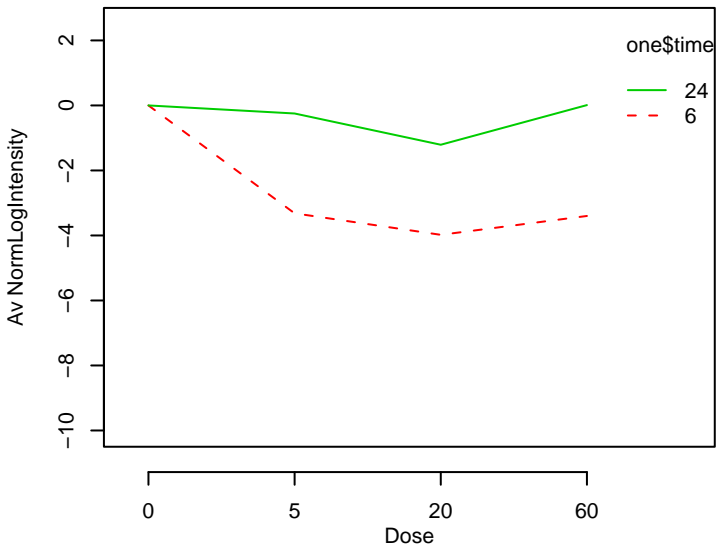

**GO\_0007595 : lactation**

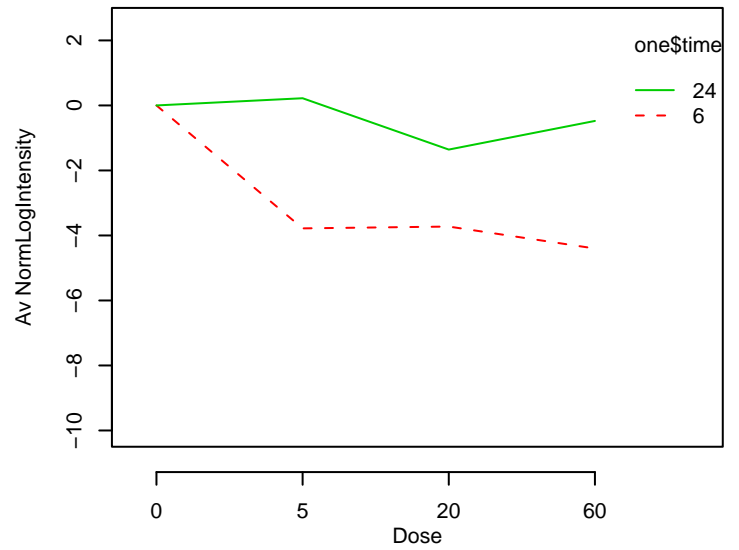

**GO\_0007596 : blood coagulation**

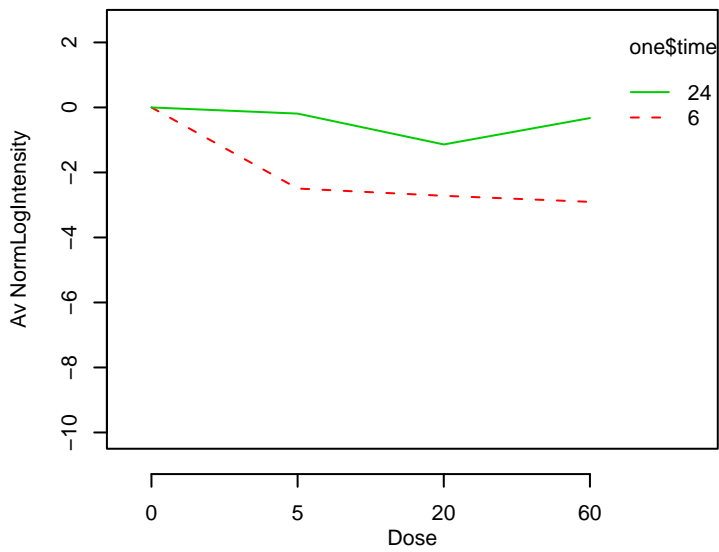

**GO\_0007599 : hemostasis**

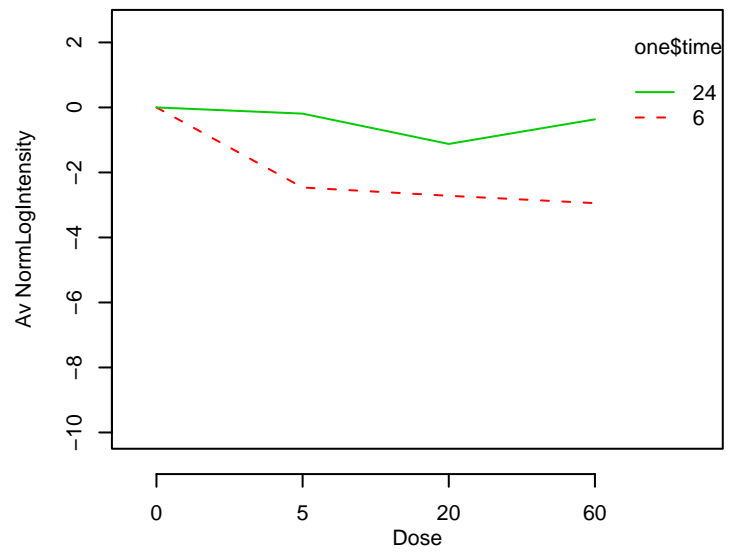

**GO\_0007601 : visual perception**

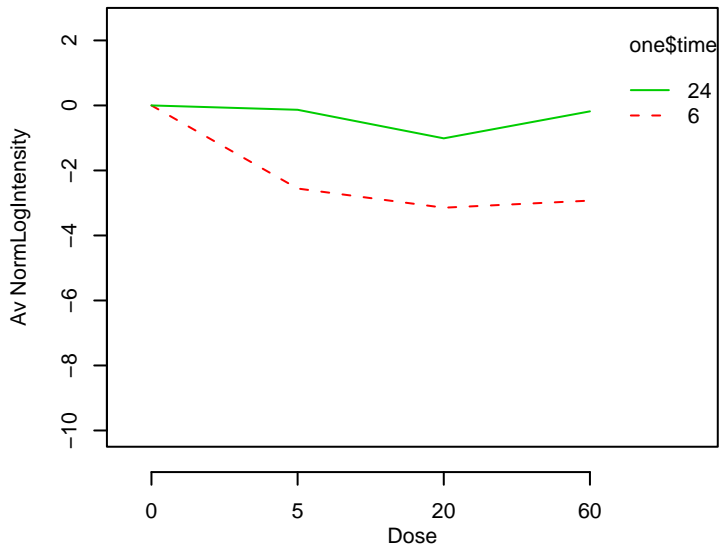

**GO\_0007602 : phototransduction**

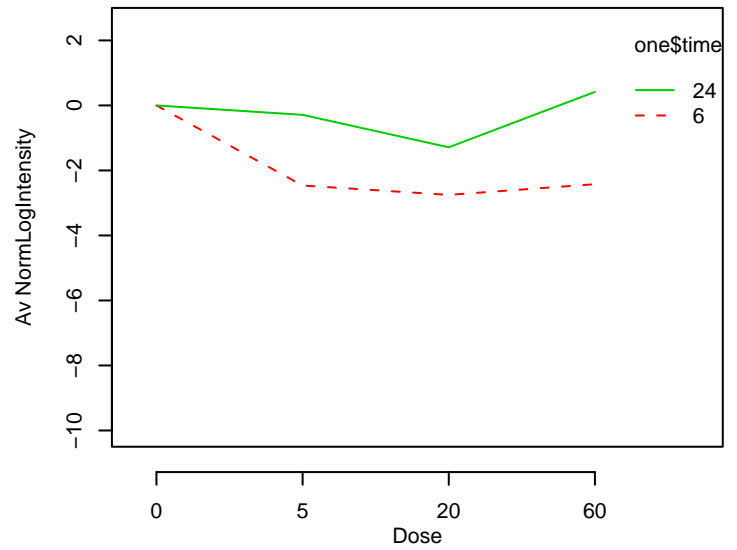

**GO\_0007603 : phototransduction), visible light**

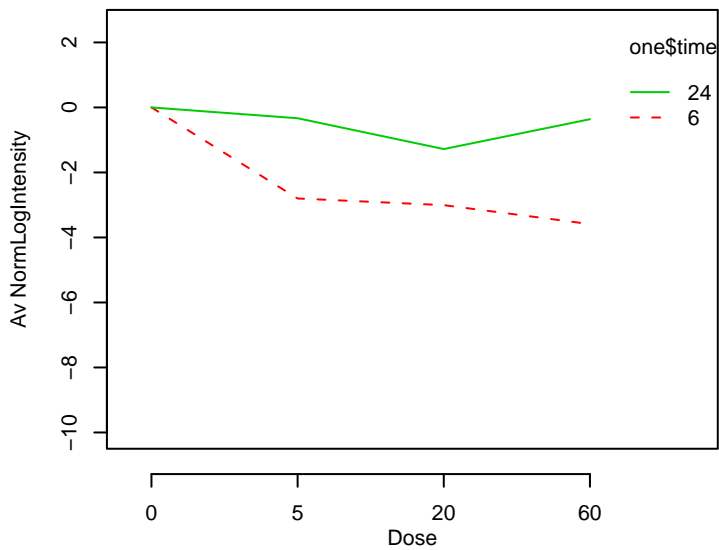

**GO\_0007605 : sensory perception of sound**

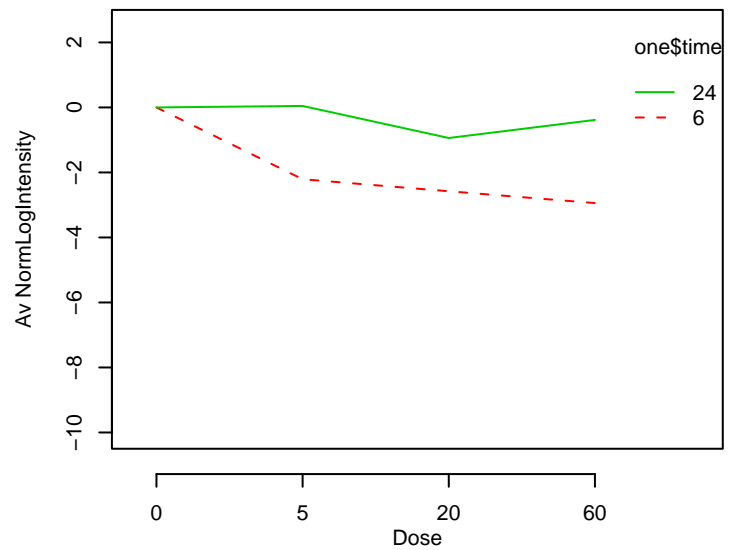

**GO\_0007606 : sensory perception of chemical stimulus**

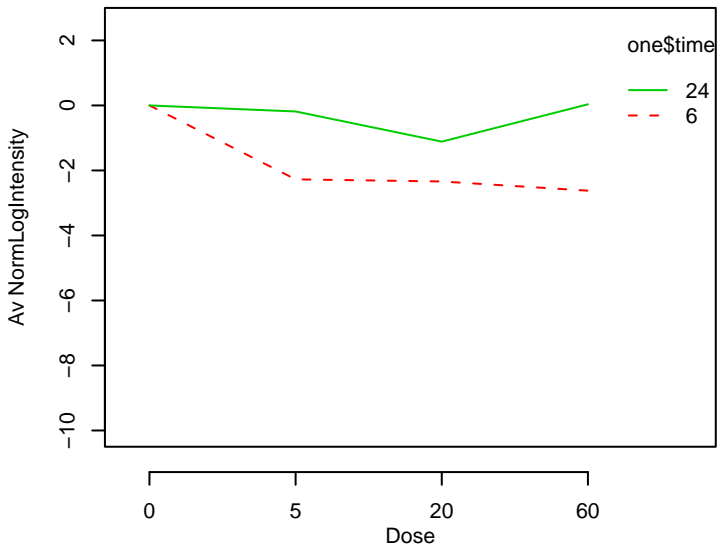

**GO\_0007608 : sensory perception of smell**

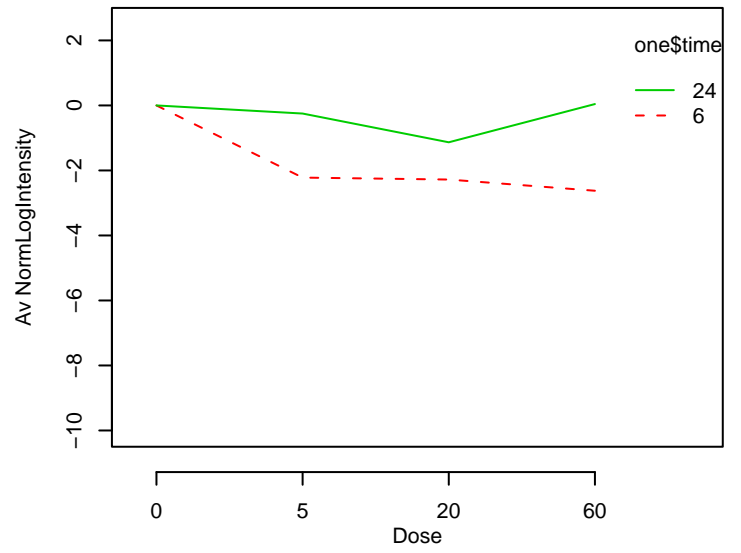

**GO\_0007611 : learning and/or memory**

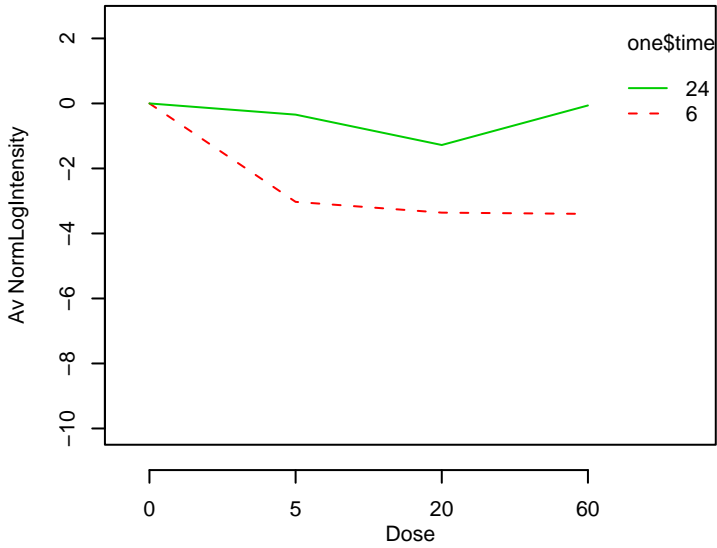

**GO\_0007612 : learning**

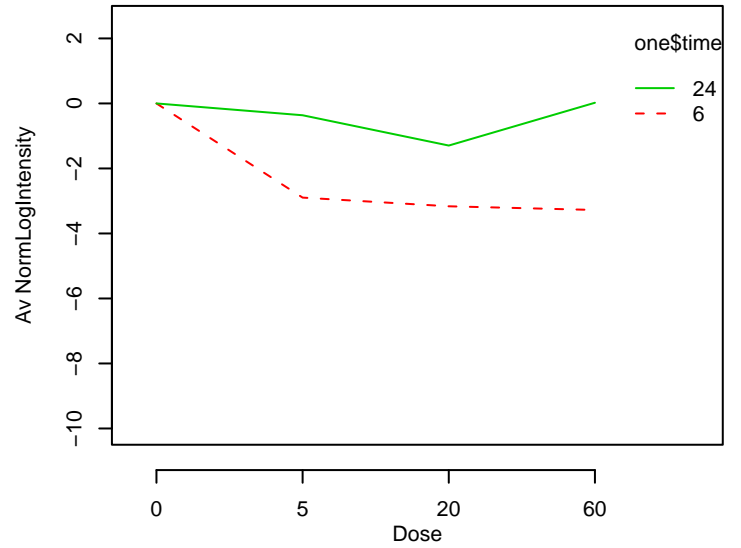

**GO\_0007613 : memory**

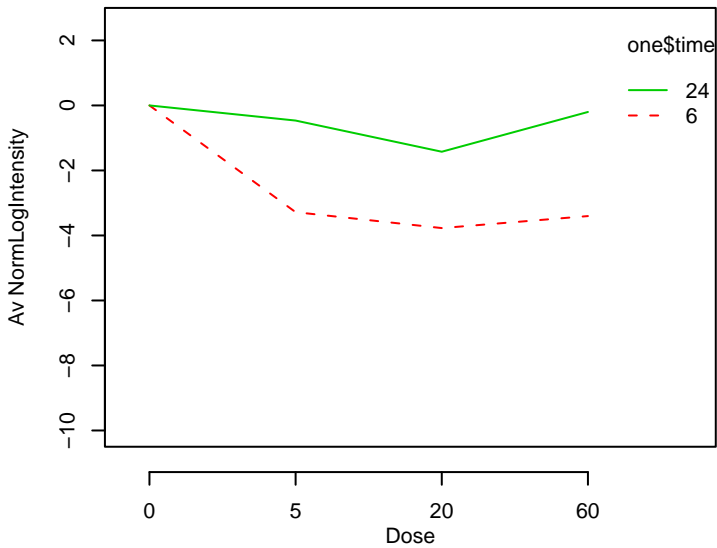

**GO\_0007617 : mating behavior**

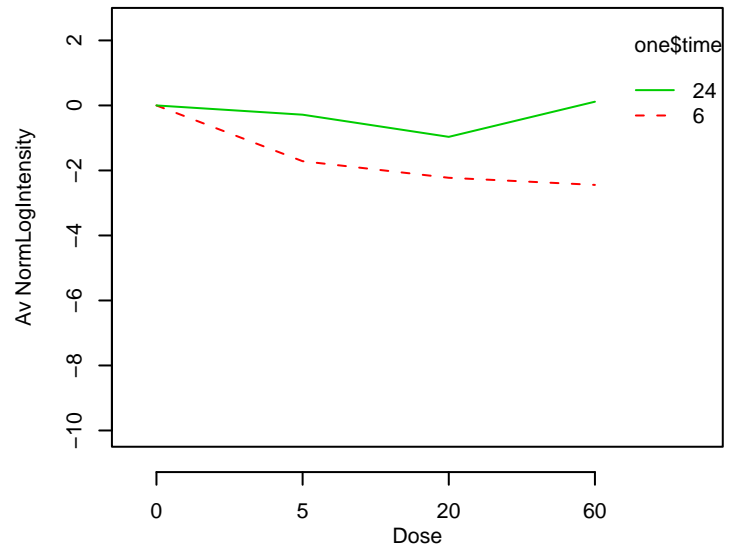

**GO\_0007623 : circadian rhythm**

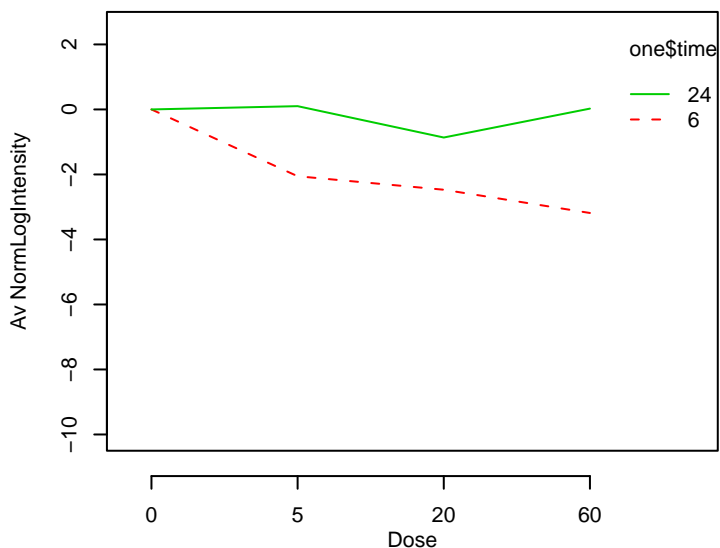

**GO\_0007626 : locomotory behavior**

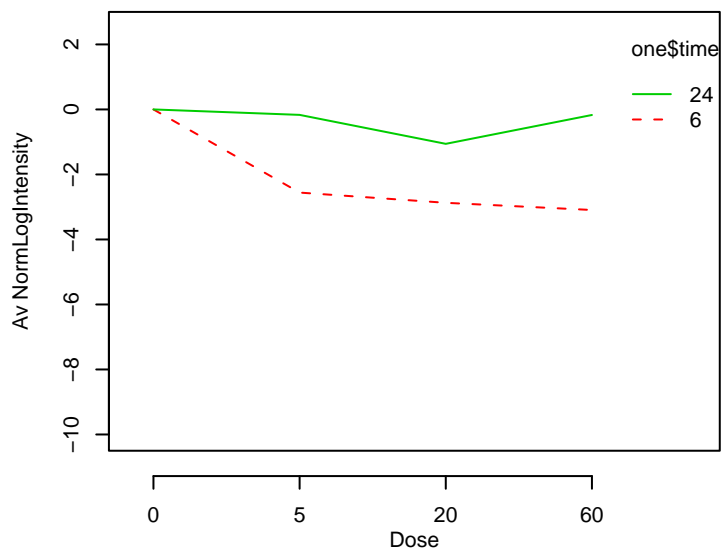

**GO\_0007628 : adult walking behavior**

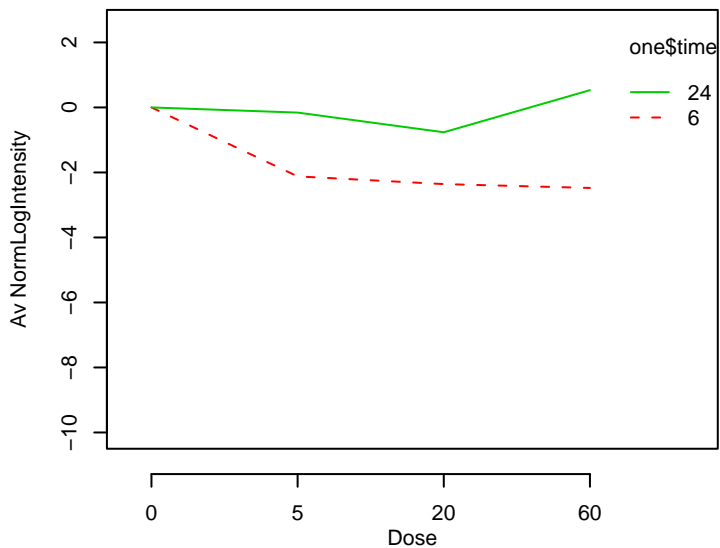

**GO\_0007631 : feeding behavior**

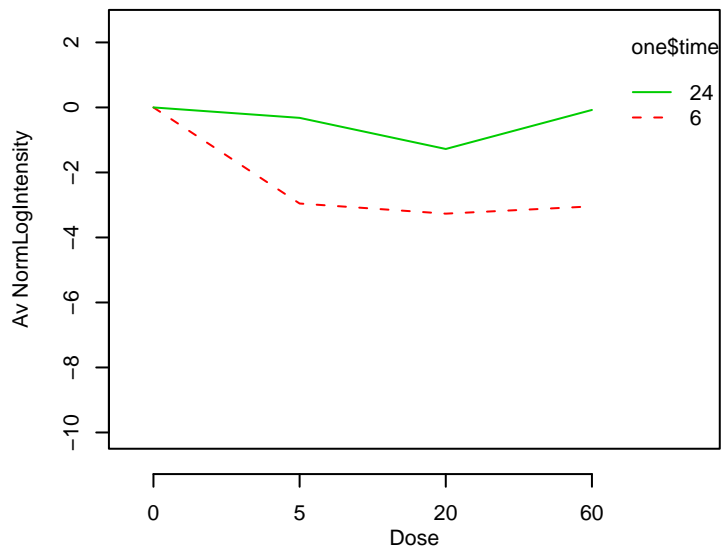

**GO\_0007632 : visual behavior**

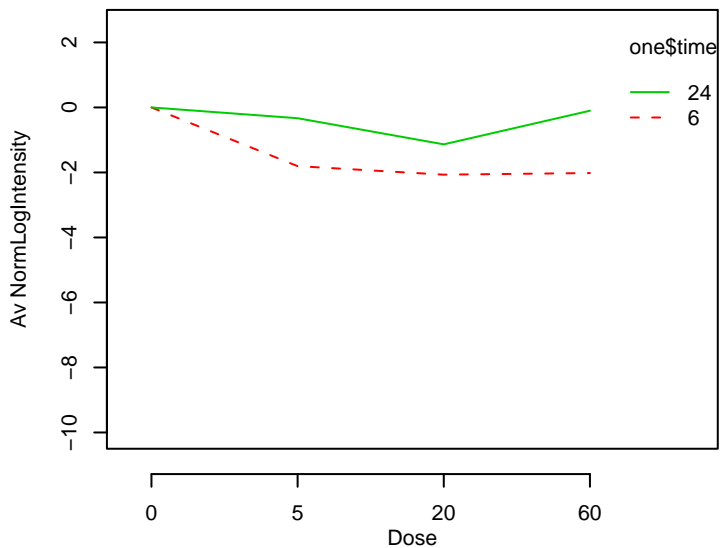

**GO\_0007635 : chemosensory behavior**

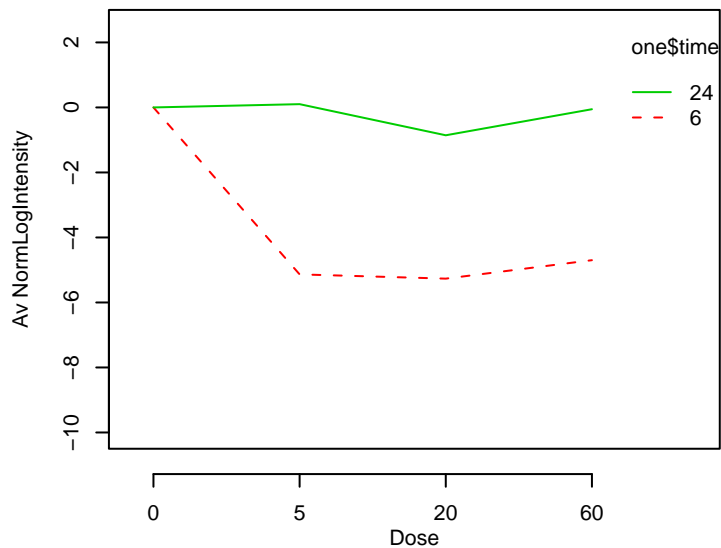



**GO\_0007638 : mechanosensory behavior**

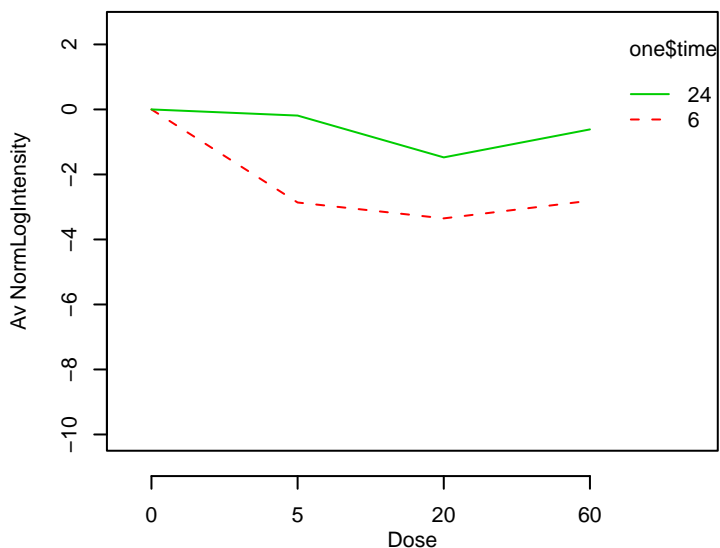

**GO\_0008015 : circulation**

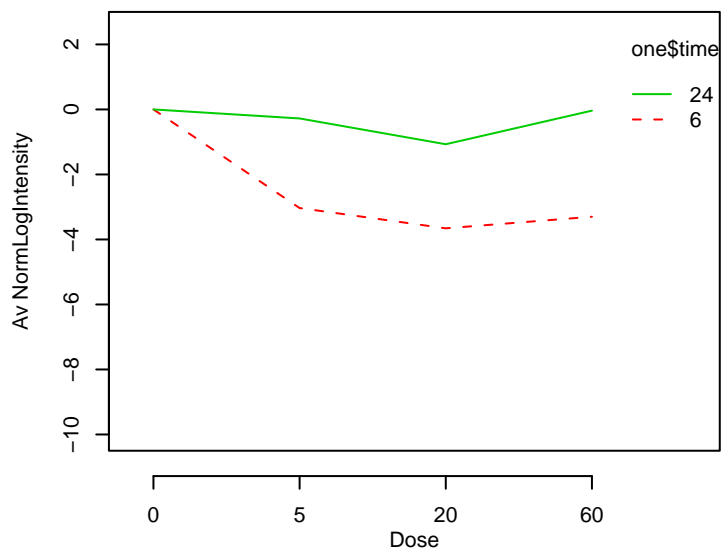

**GO\_0008016 : regulation of heart contraction**

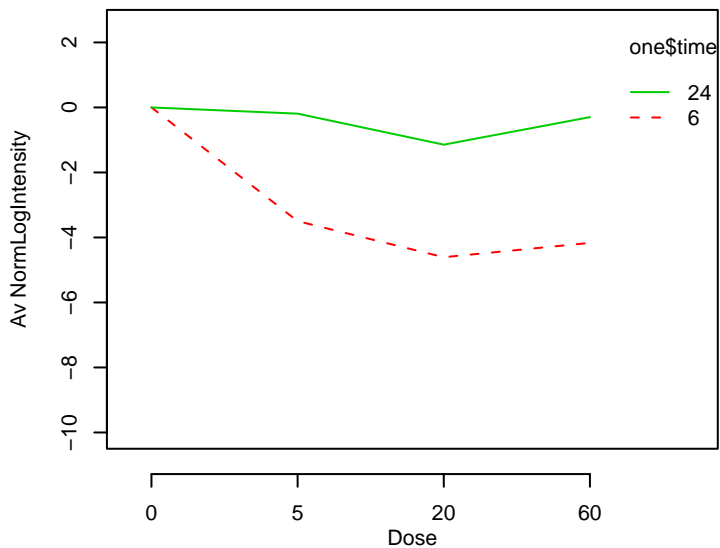

**GO\_0008033 : tRNA processing**

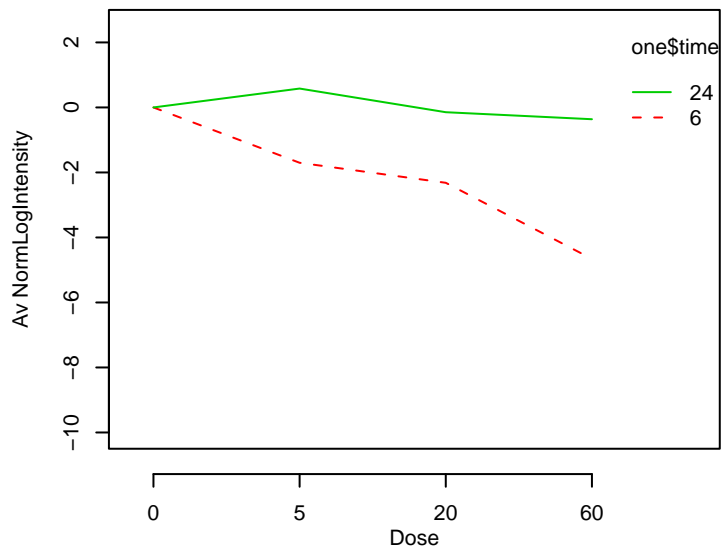

**GO\_0008037 : cell recognition**

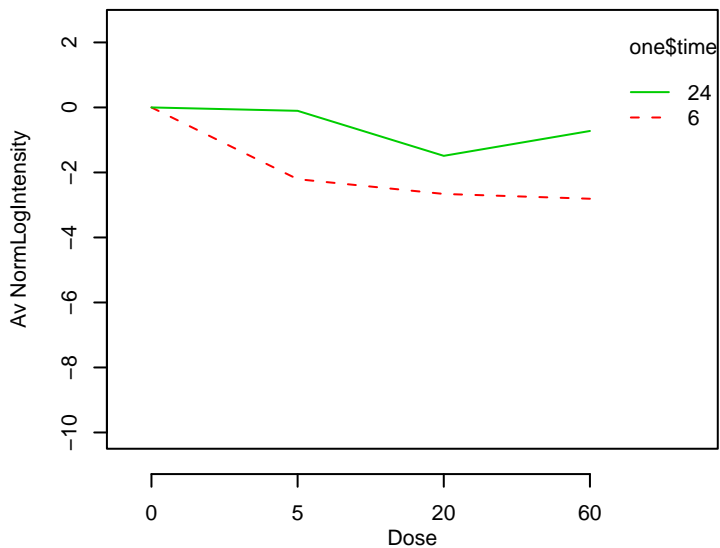

**GO\_0008038 : neuron recognition**

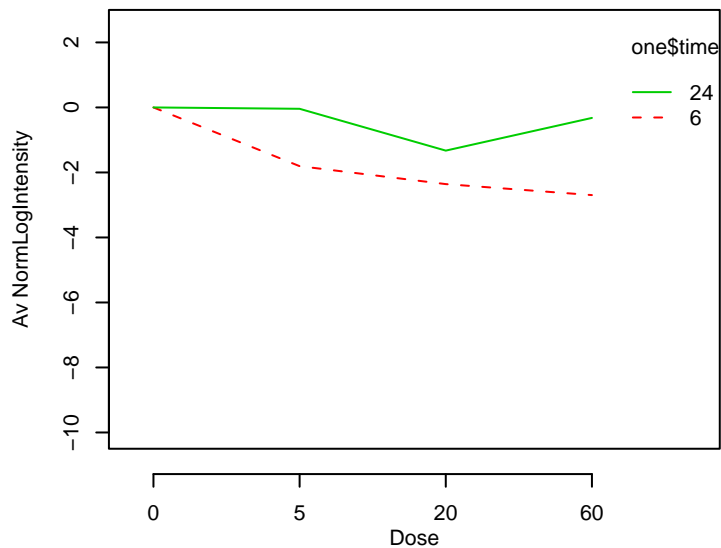

**GO\_0008045 : motor axon guidance**

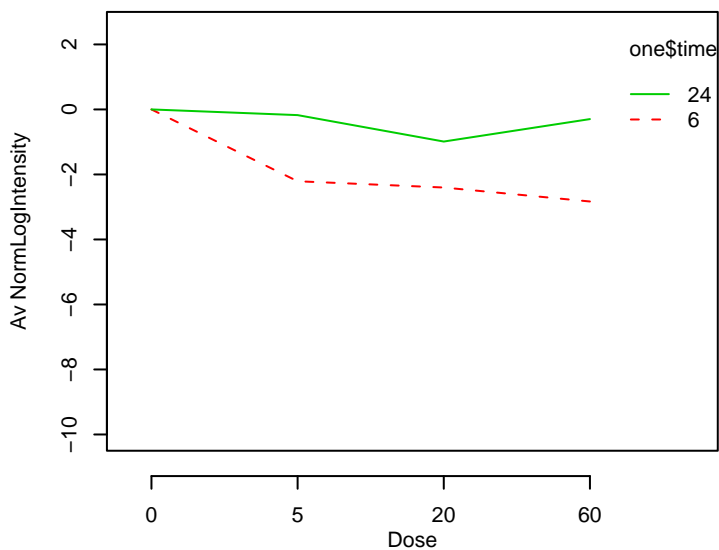

**GO\_0008064 : regulation of actin polymerization and/or depol**

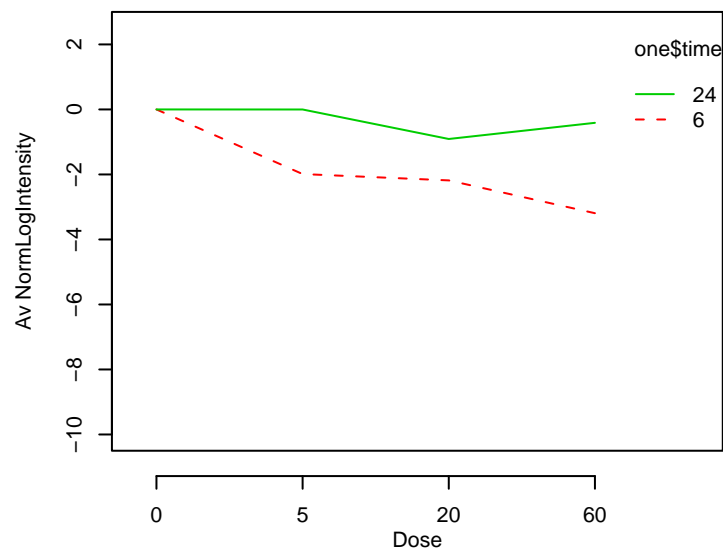

**GO\_0008088 : axon cargo transport**

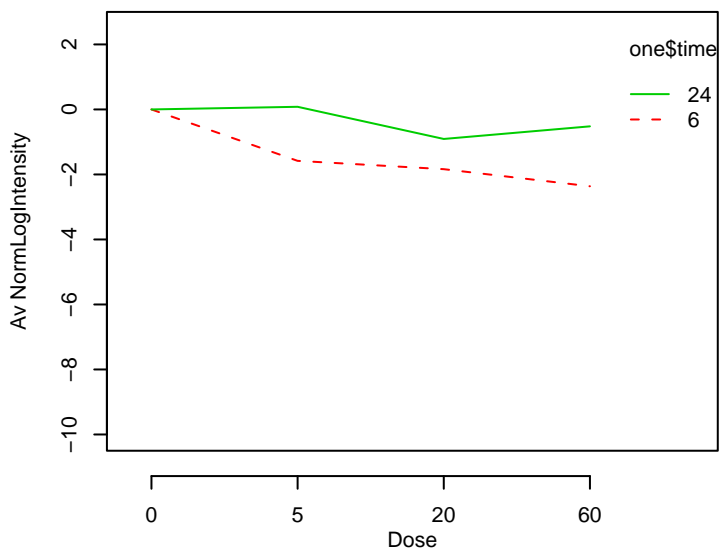

**GO\_0008105 : asymmetric protein localization**

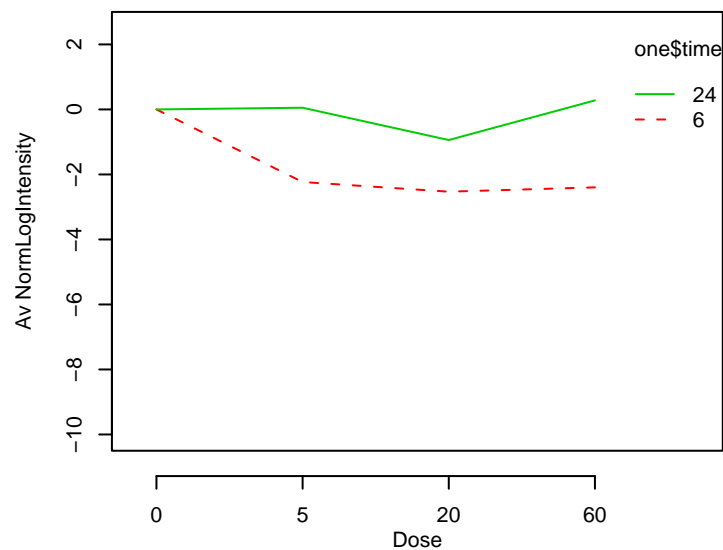

**GO\_0008154 : actin polymerization and/or depolymerizatio**

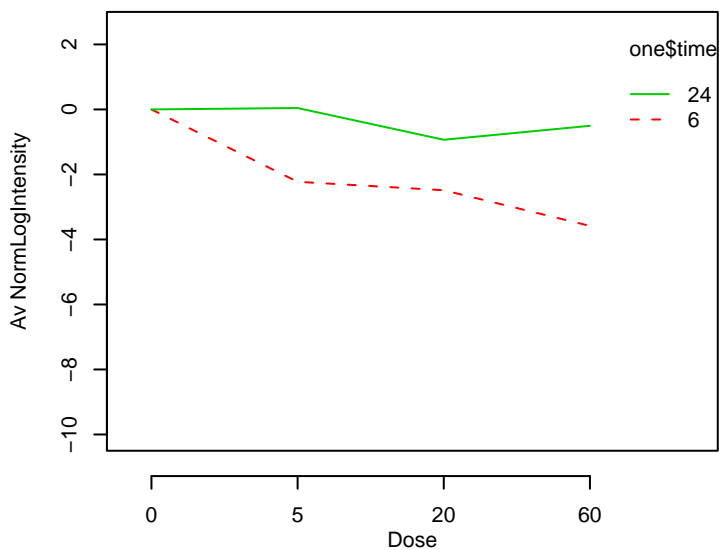

**GO\_0008156 : negative regulation of DNA replication**

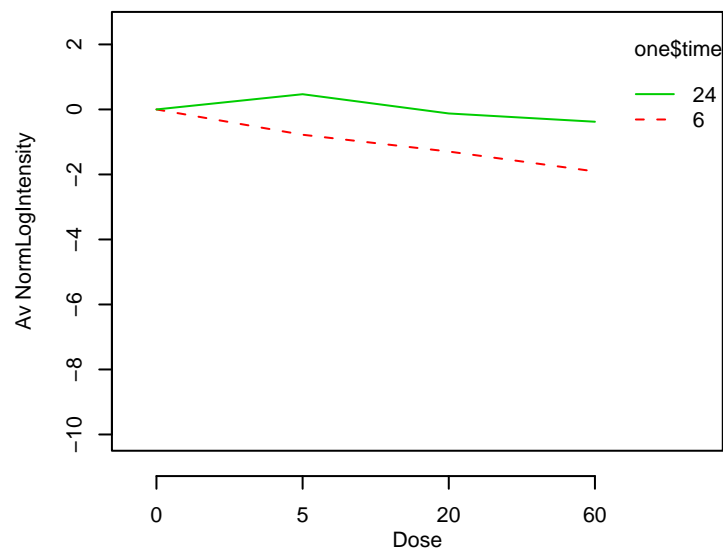

**GO\_0008202 : steroid metabolism**

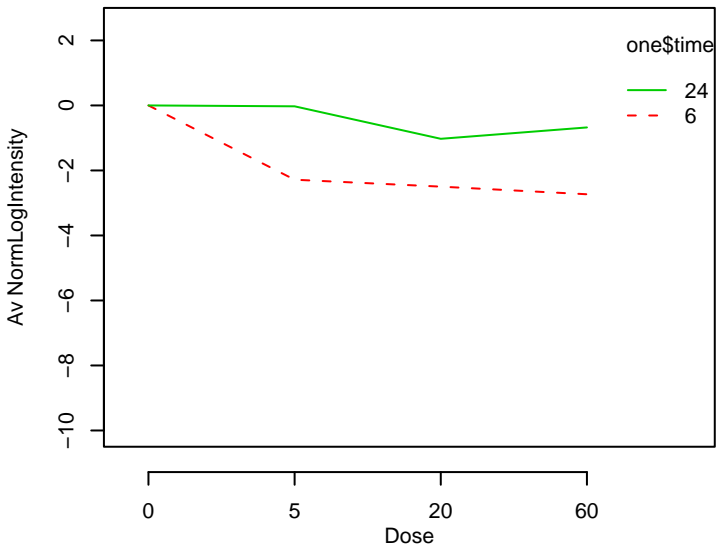

**GO\_0008203 : cholesterol metabolism**

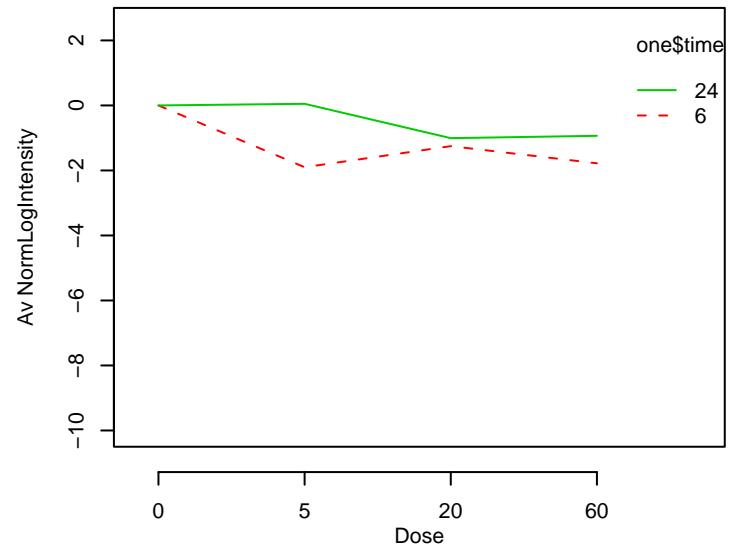

**GO\_0008206 : bile acid metabolism**

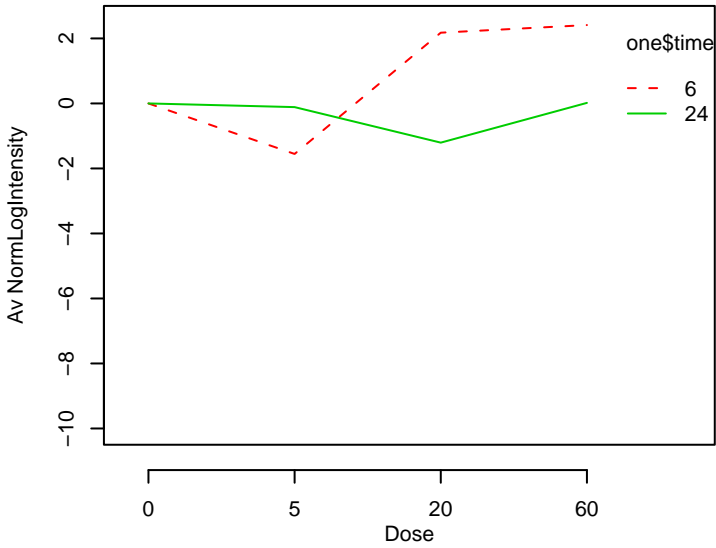

**GO\_0008207 : C21-steroid hormone metabolism**

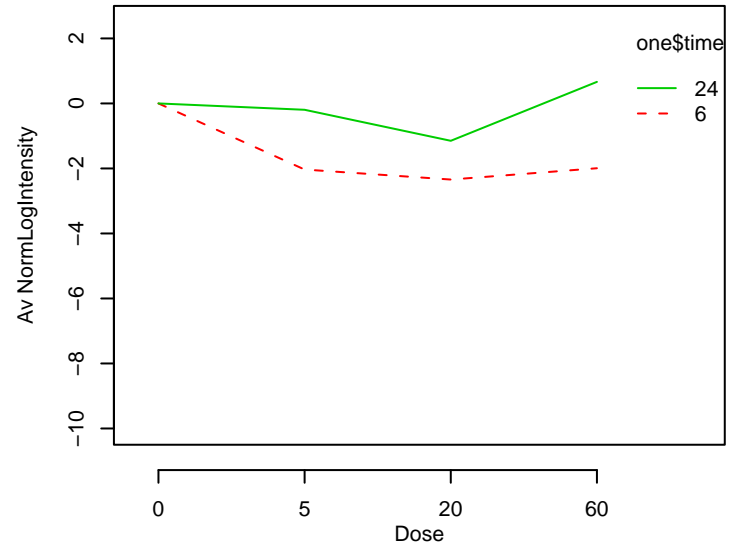

**GO\_0008209 : androgen metabolism**

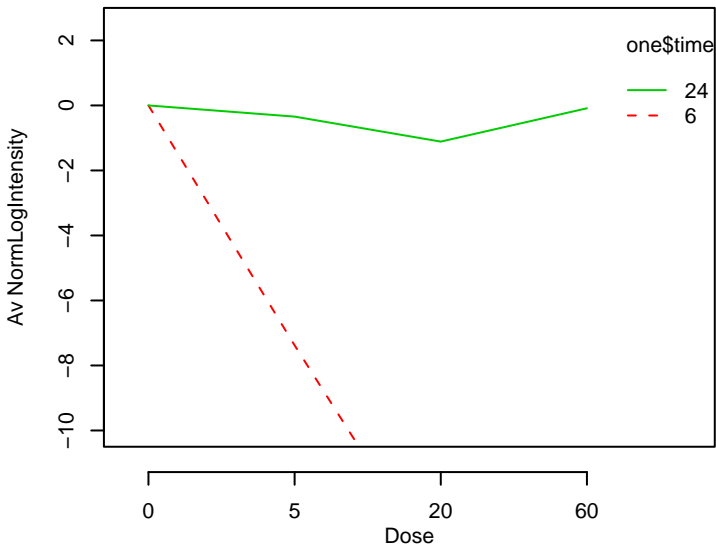

**GO\_0008210 : estrogen metabolism**

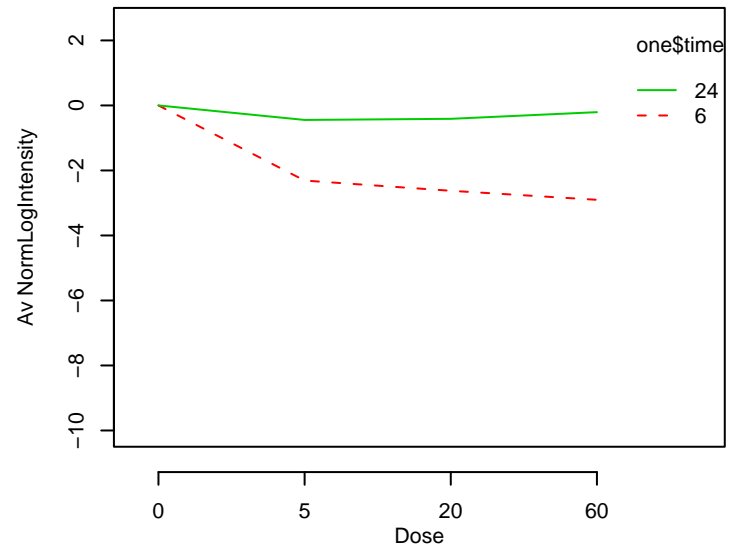

**GO\_0008213 : protein amino acid alkylation**

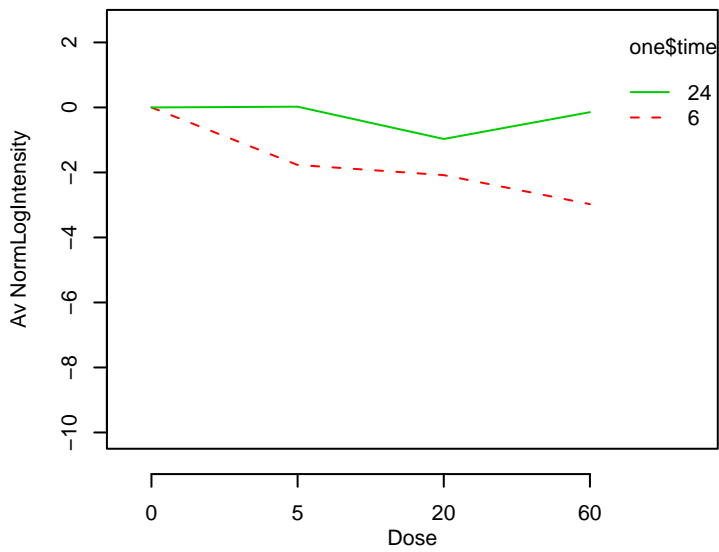

**GO\_0008216 : spermidine metabolism**

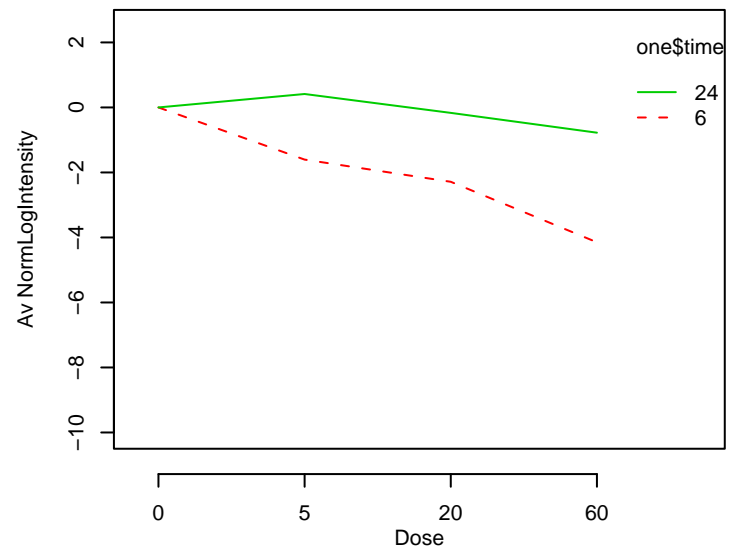

**GO\_0008217 : blood pressure regulation**

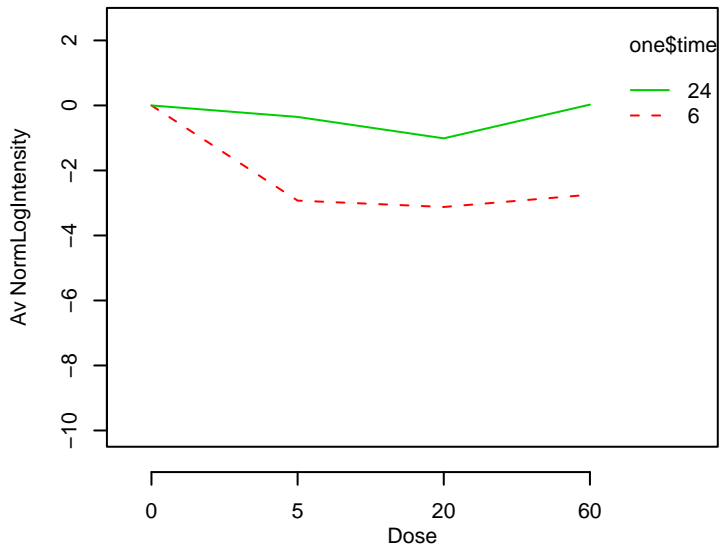

**GO\_0008272 : sulfate transport**

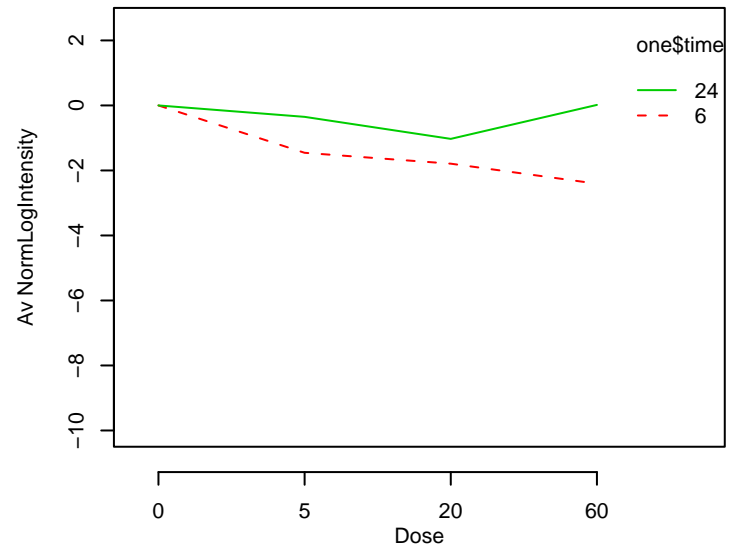

**GO\_0008277 : regulation of G-protein coupled receptor prote**

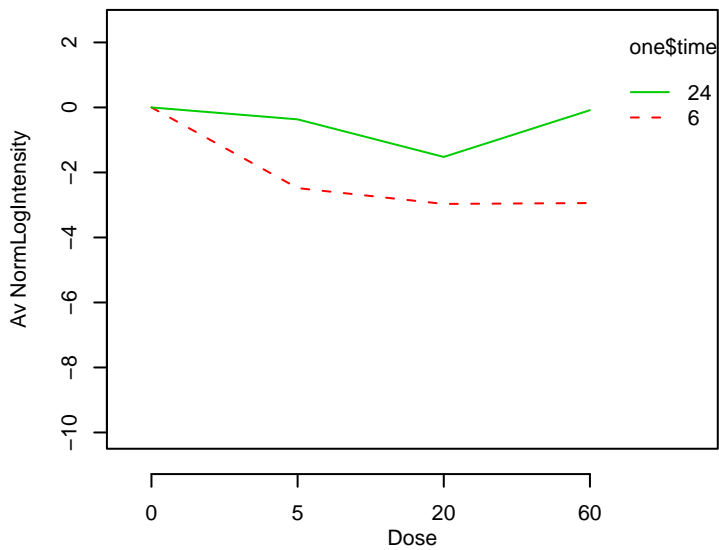

**GO\_0008284 : positive regulation of cell proliferation**

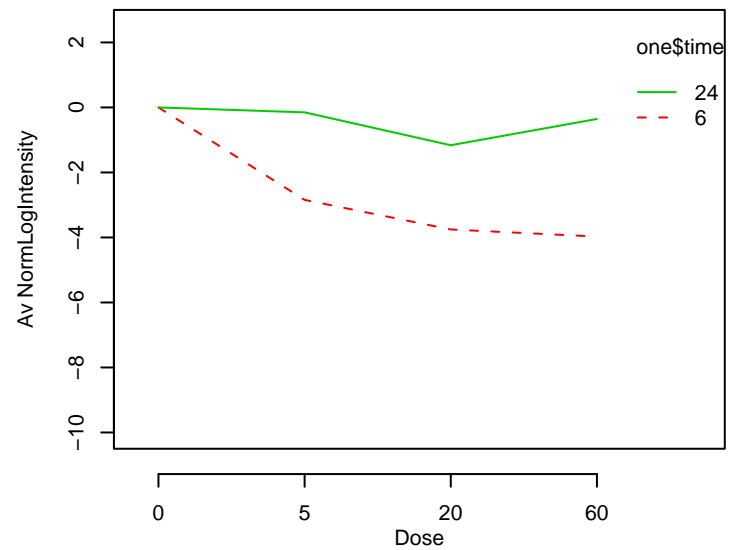

**GO\_0008285 : negative regulation of cell proliferation**

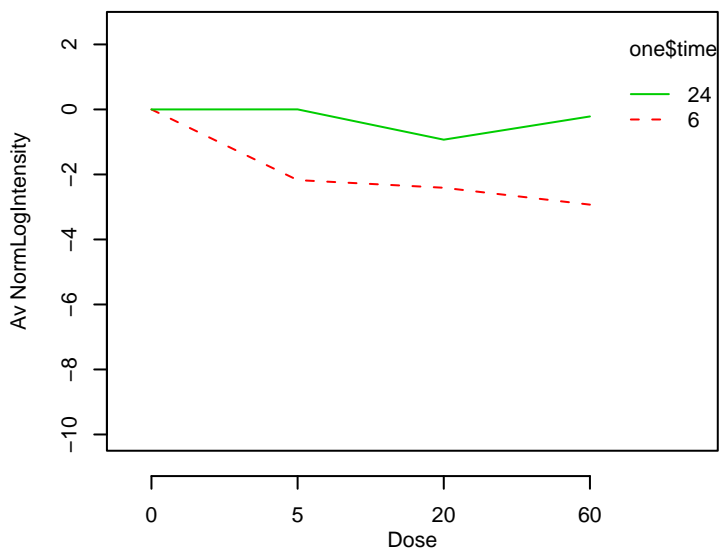

**GO\_0008286 : insulin receptor signaling pathway**

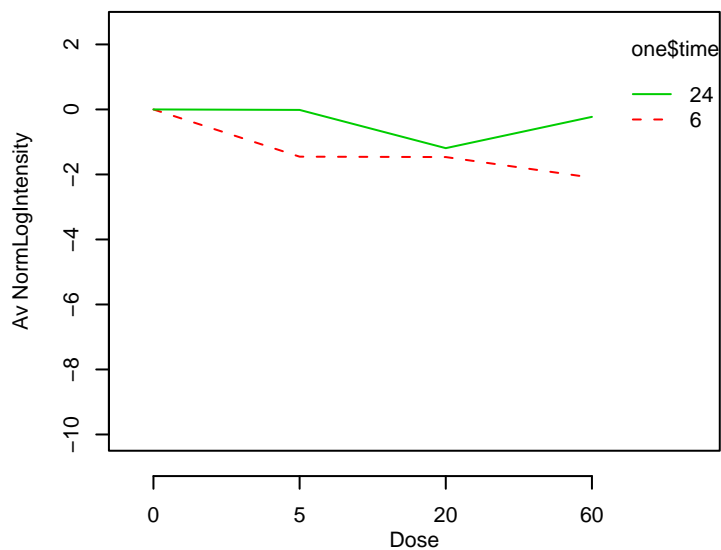

**GO\_0008299 : isoprenoid biosynthesis**

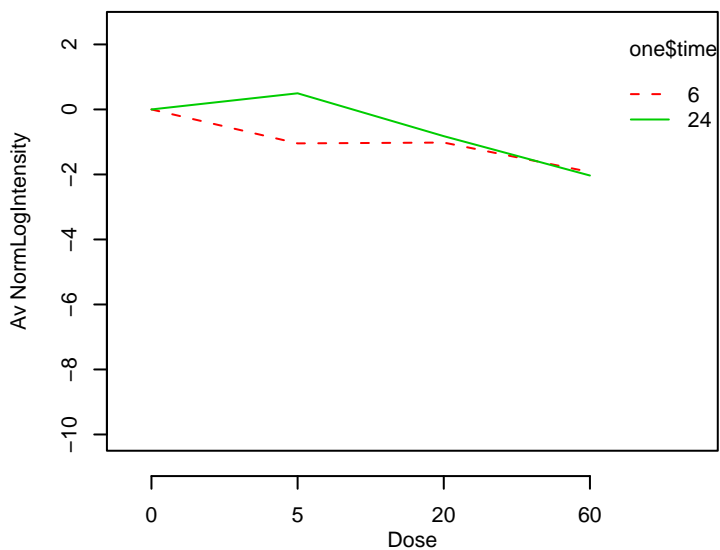

**GO\_0008306 : associative learning**

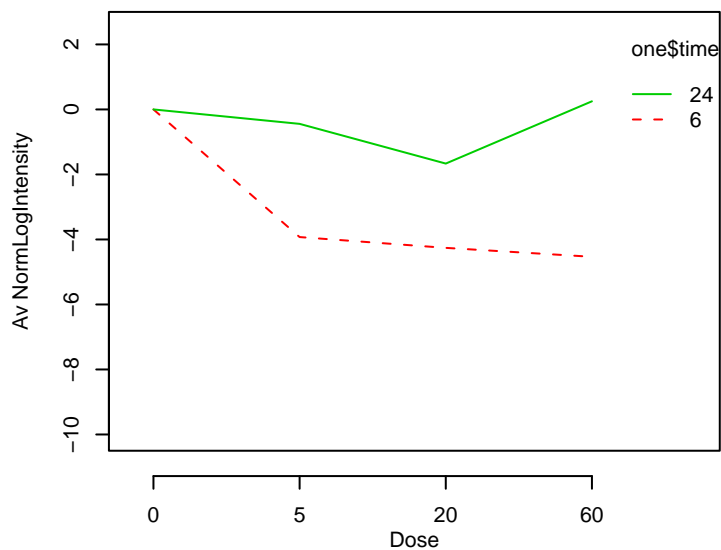

**GO\_0008333 : endosome to lysosome transport**

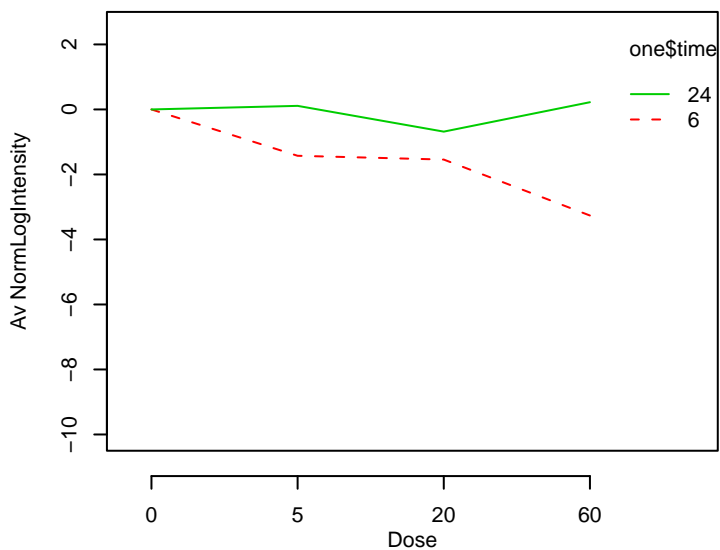

**GO\_0008344 : adult locomotory behavior**

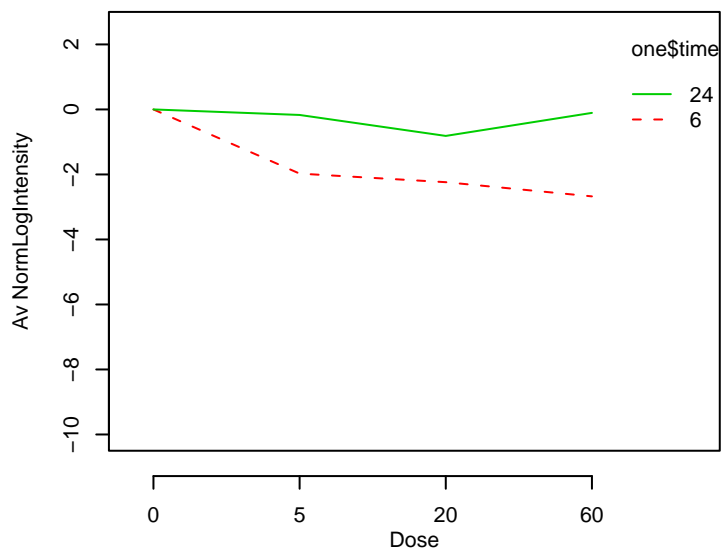

**GO\_0008354 : germ cell migration**

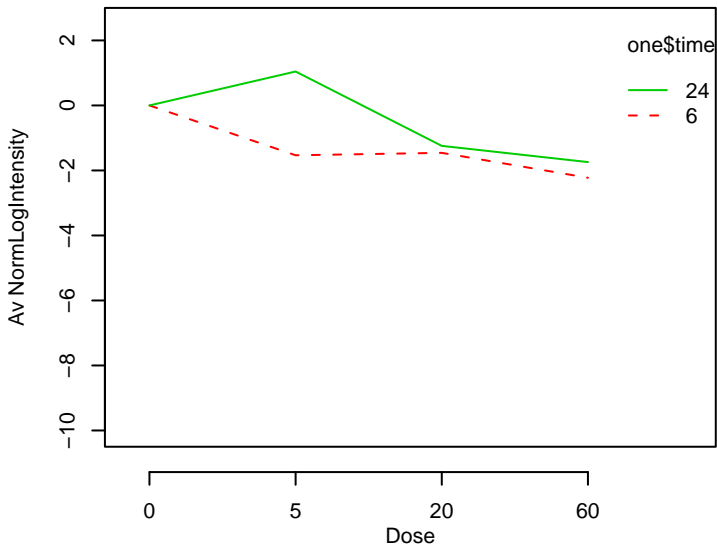

**GO\_0008360 : regulation of cell shape**

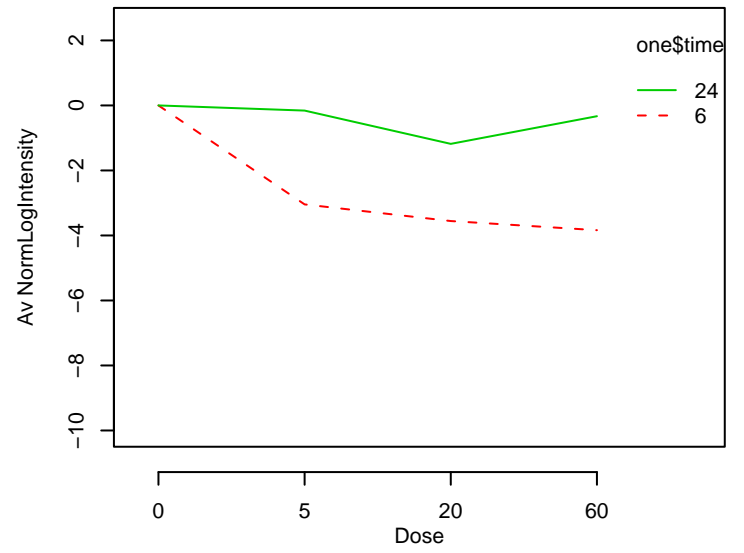

**GO\_0008361 : regulation of cell size**

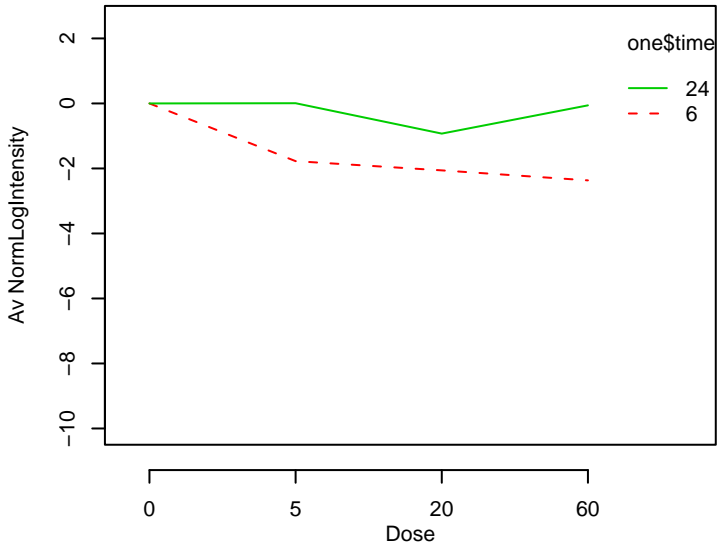

**GO\_0008366 : axon ensheathment**

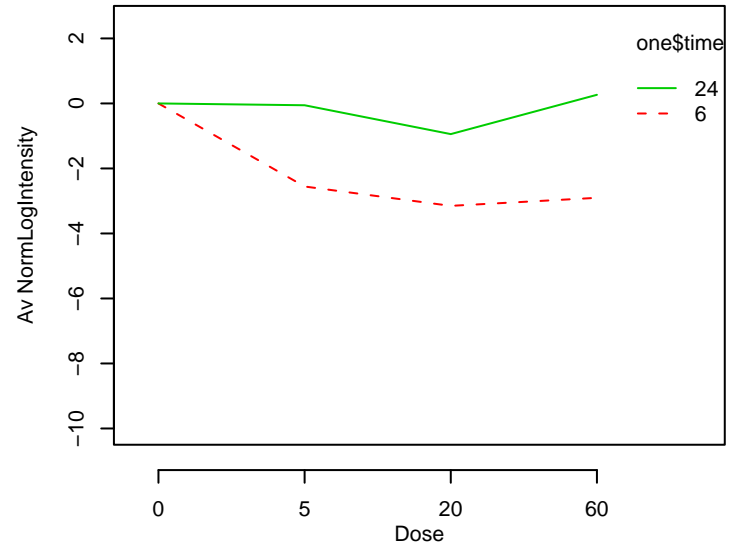

**GO\_0008380 : RNA splicing**

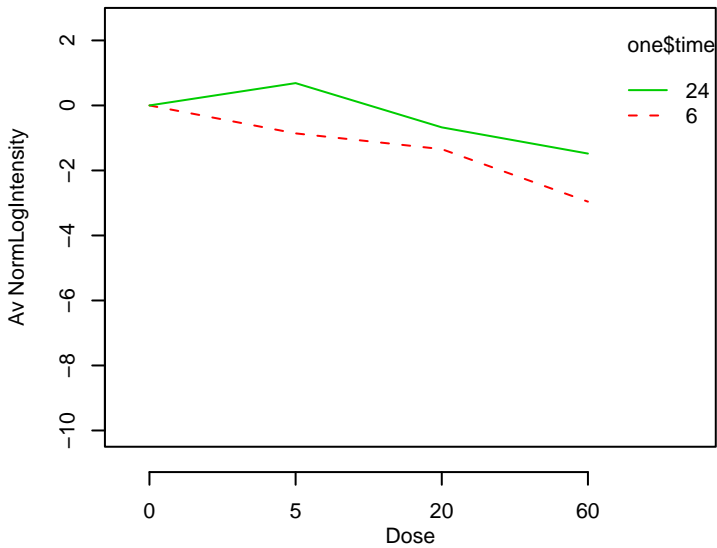

**GO\_0008406 : gonad development**

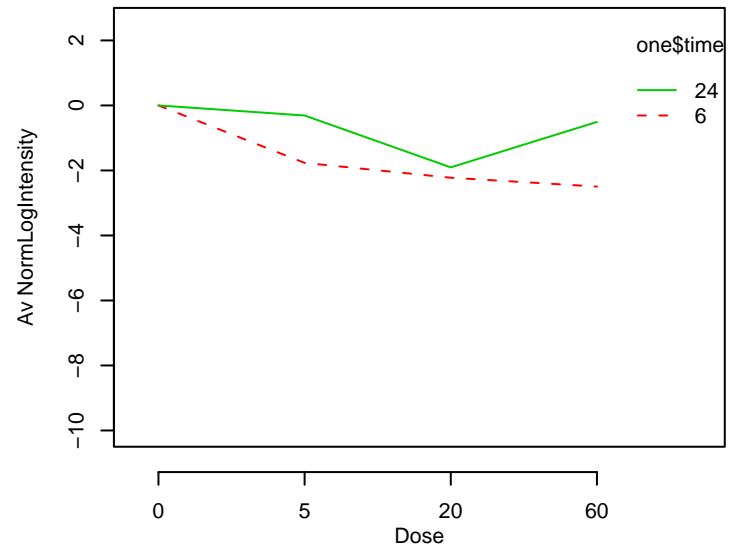

**GO\_0008535 : cytochrome c oxidase complex assembly**

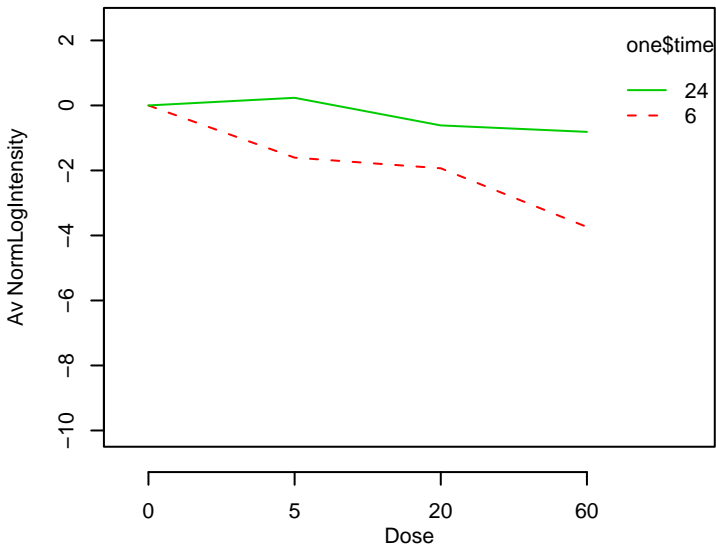

**GO\_0008542 : visual learning**

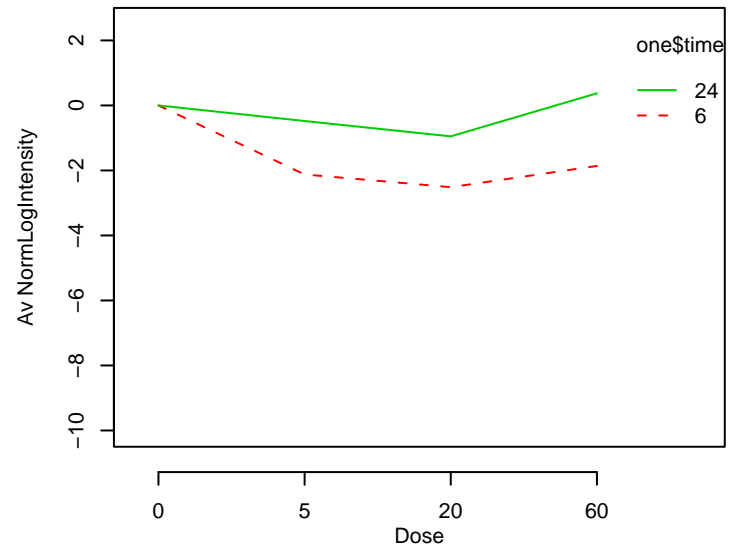

**GO\_0008543 : fibroblast growth factor receptor signaling pat**

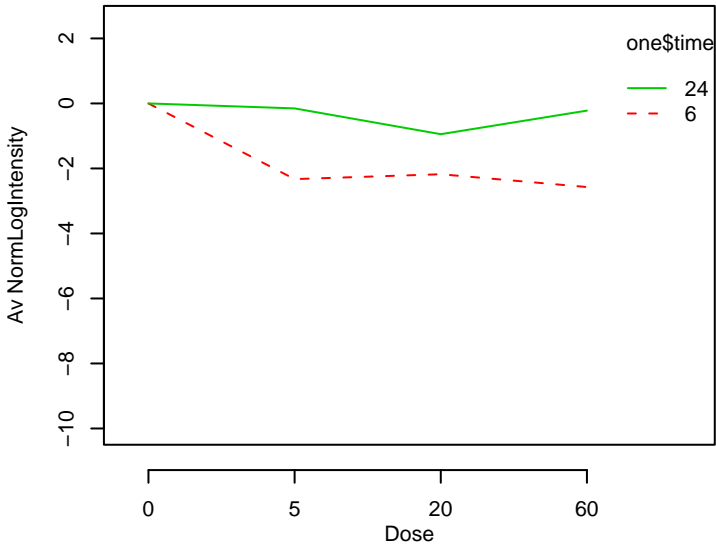

**GO\_0008544 : epidermis development**

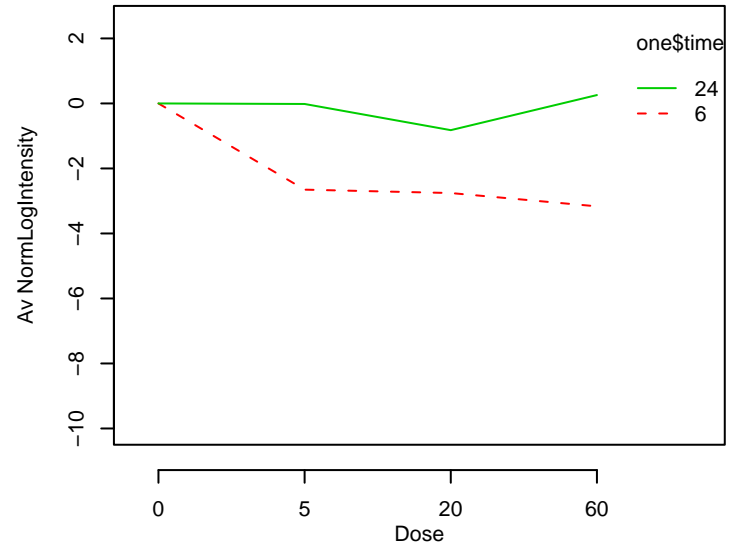

**GO\_0008582 : regulation of synaptic growth at neuromuscula**

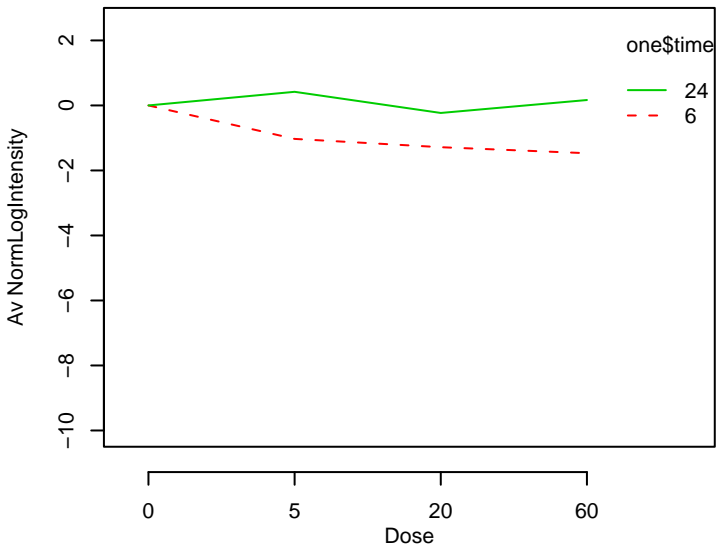

**GO\_0008584 : male gonad development**

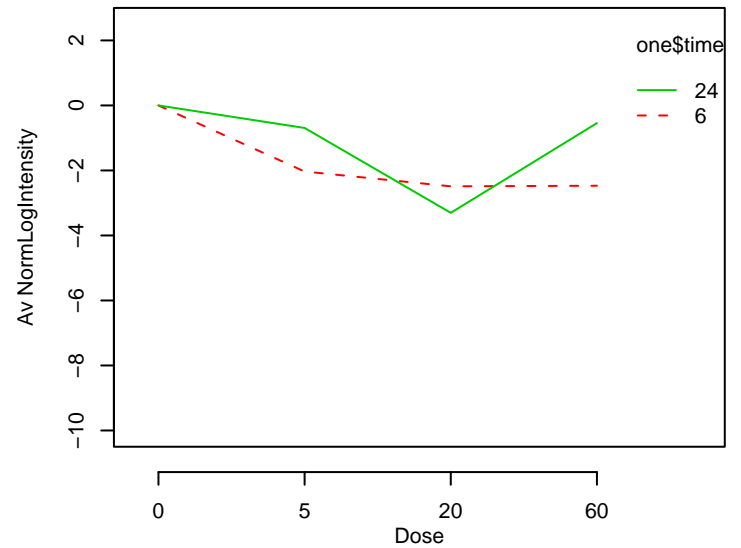

**GO\_0008585 : female gonad development**

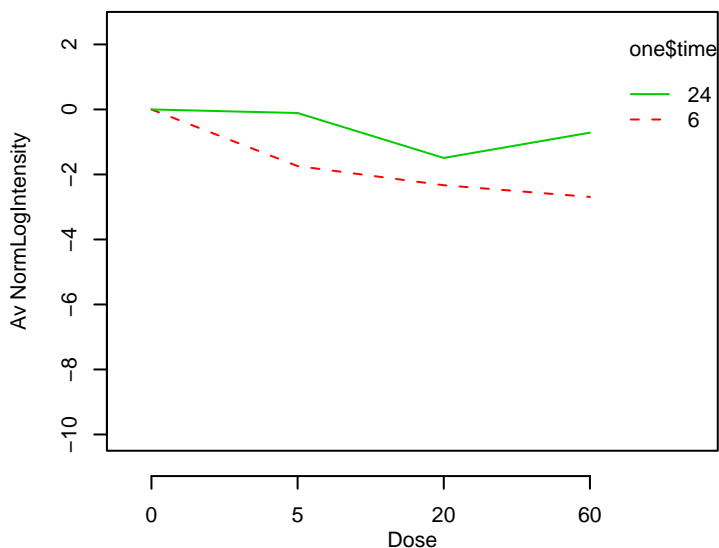

**GO\_0008589 : regulation of smoothed signaling pathwa**

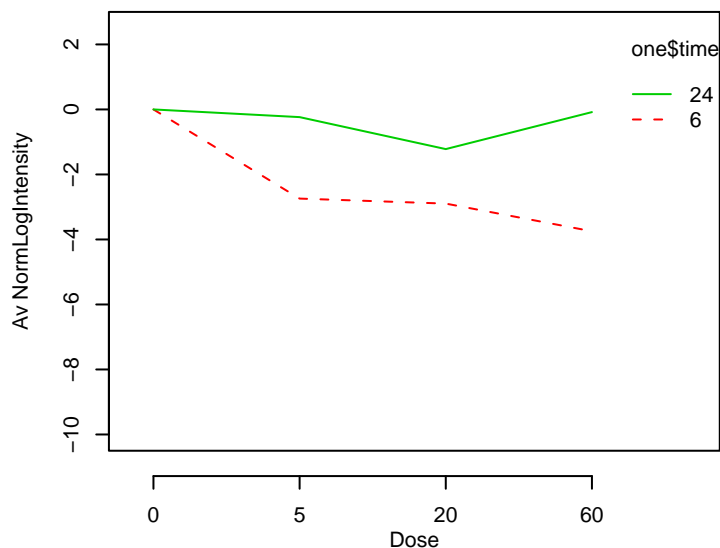

**GO\_0008593 : regulation of Notch signaling pathway**

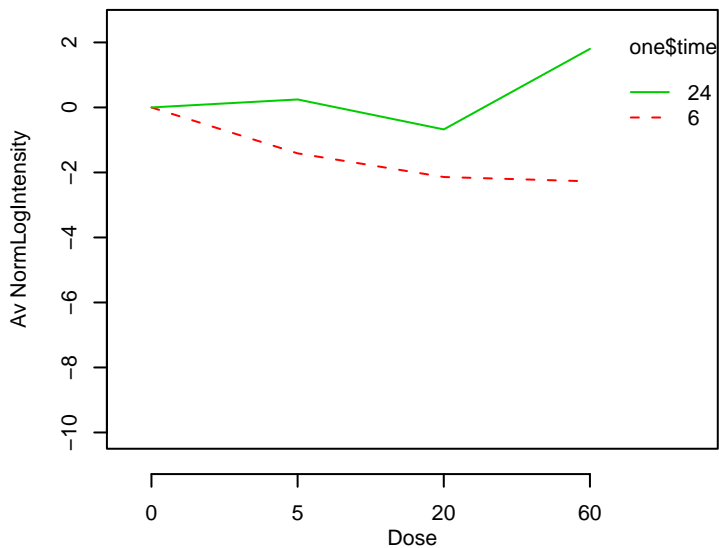

**GO\_0008595 : determination of anterior/posterior axis\, emb**

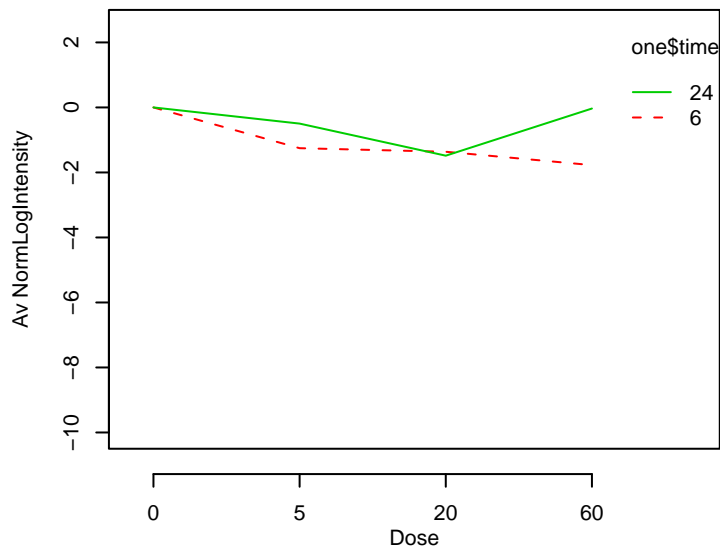

**GO\_0008610 : lipid biosynthesis**

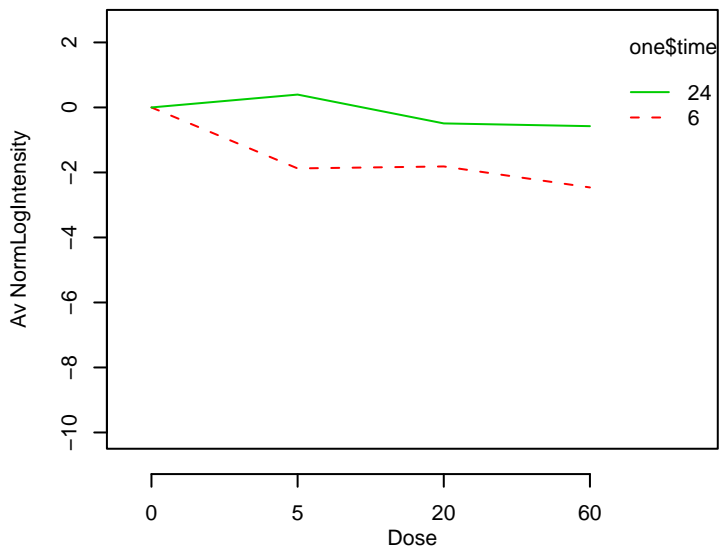

**GO\_0008624 : induction of apoptosis by extracellular signa**

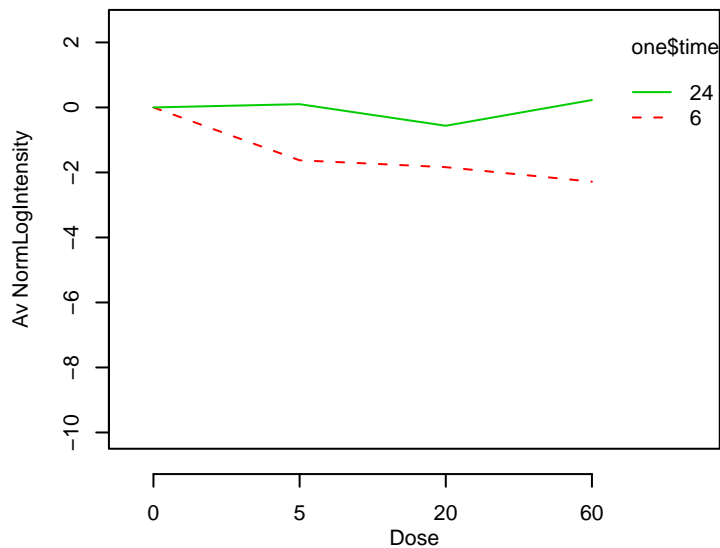



**GO\_0008625 : induction of apoptosis via death domain recep**

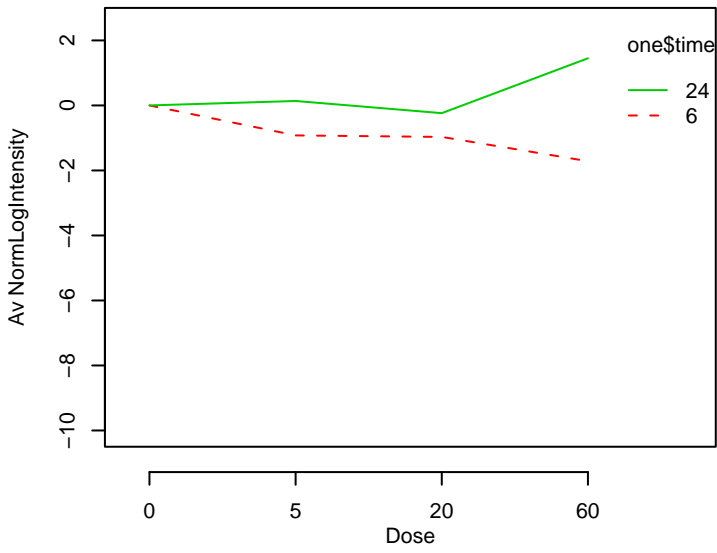

**GO\_0008629 : induction of apoptosis by intracellular signa**

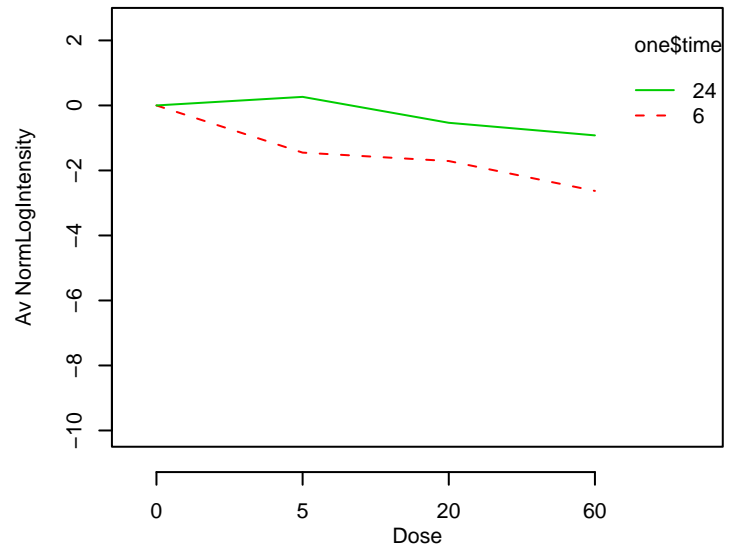

**GO\_0008630 : DNA damage response, signal transduction res**

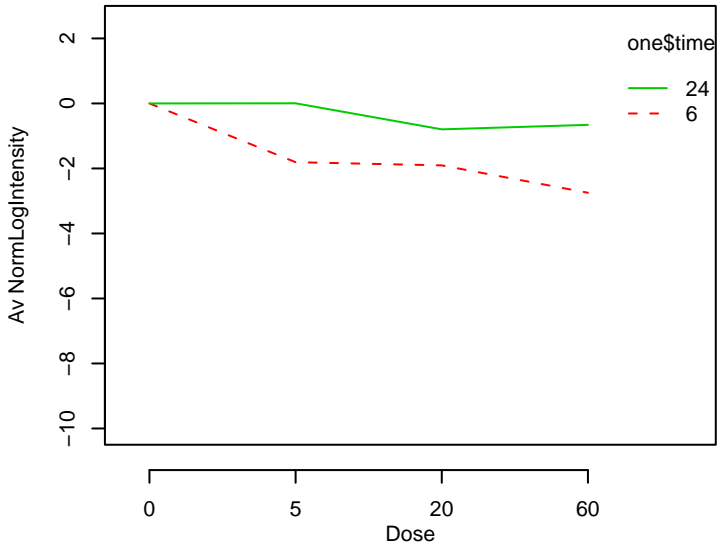

**GO\_0008631 : induction of apoptosis by oxidative stress**

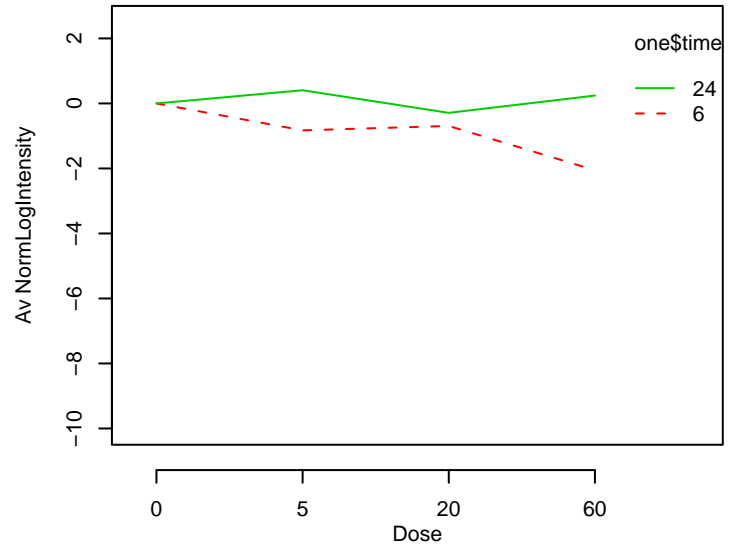

**GO\_0008632 : apoptotic program**

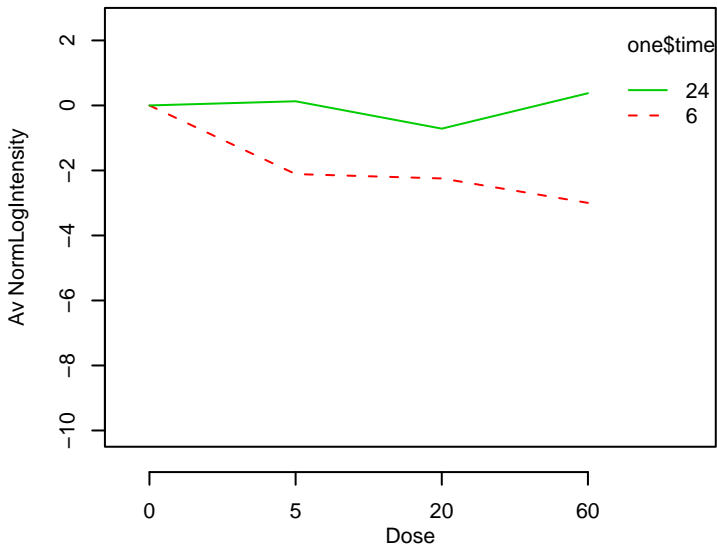

**GO\_0008634 : negative regulation of survival gene product a**

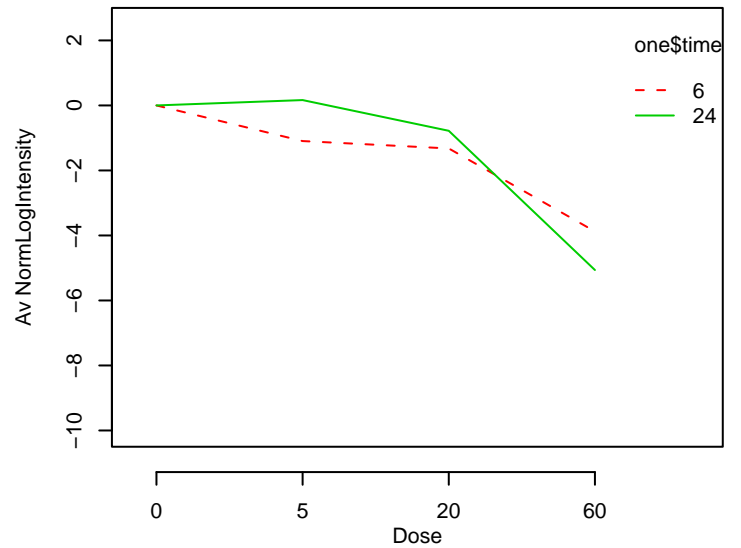

**GO\_0008635 : caspase activation via cytochrome c**

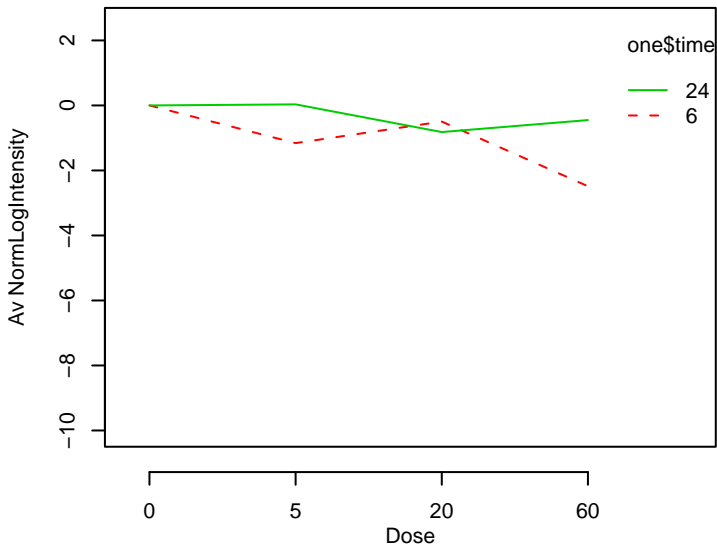

**GO\_0008637 : apoptotic mitochondrial changes**

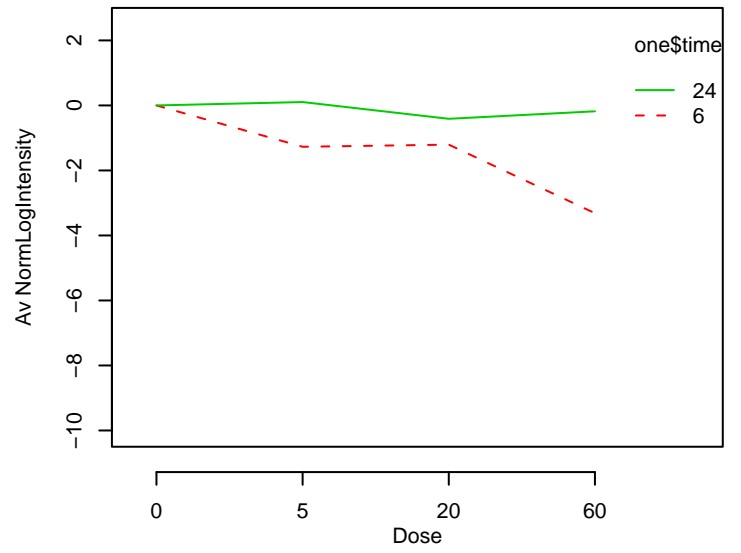

**GO\_0008643 : carbohydrate transport**

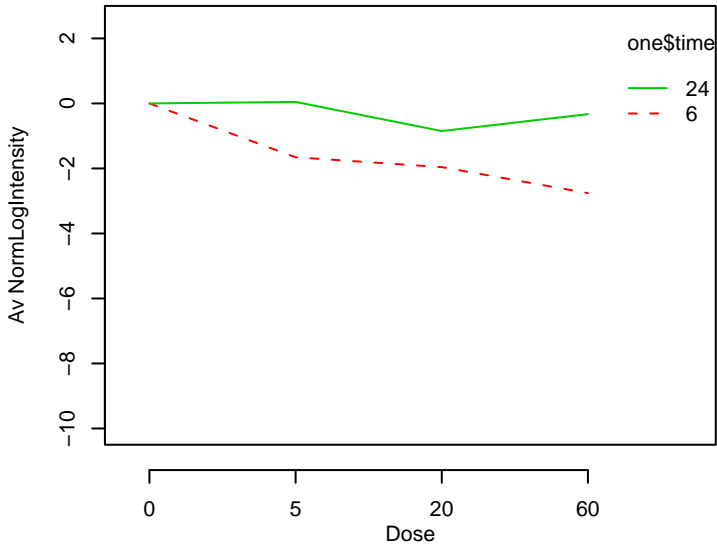

**GO\_0008645 : hexose transport**

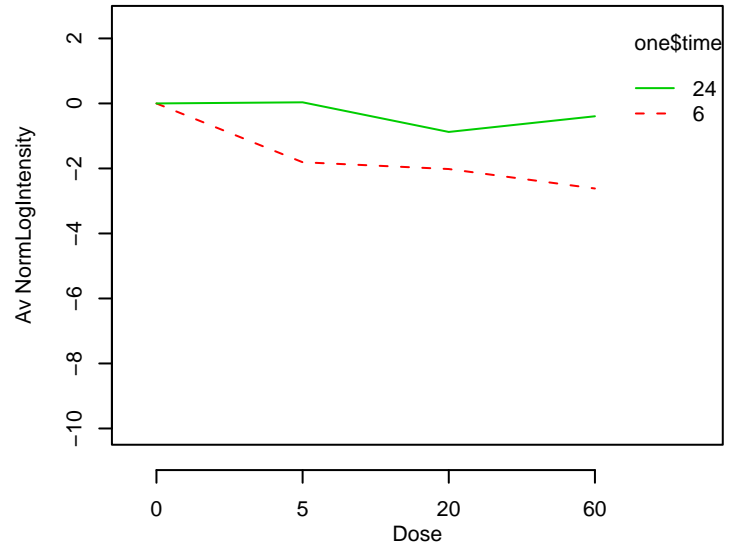

**GO\_0008652 : amino acid biosynthesis**

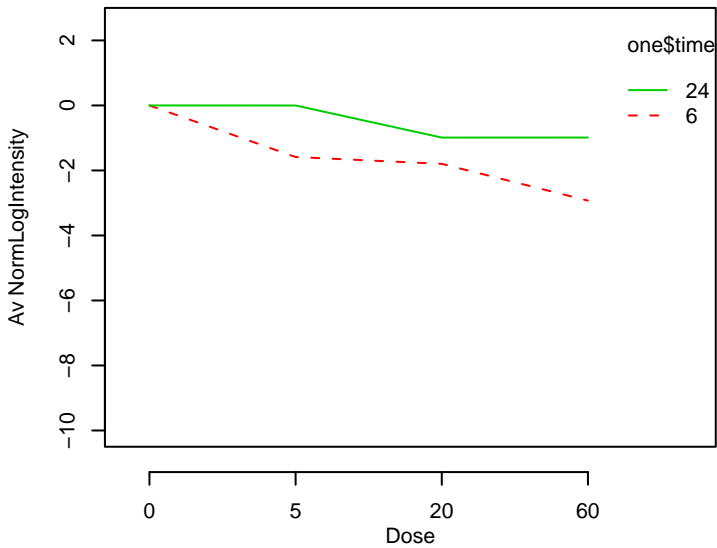

**GO\_0008653 : lipopolysaccharide metabolism**

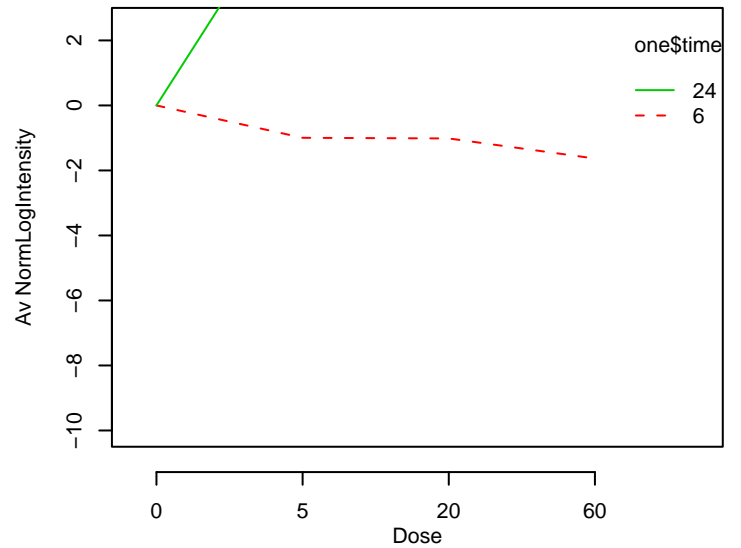

**GO\_0008654 : phospholipid biosynthesis**

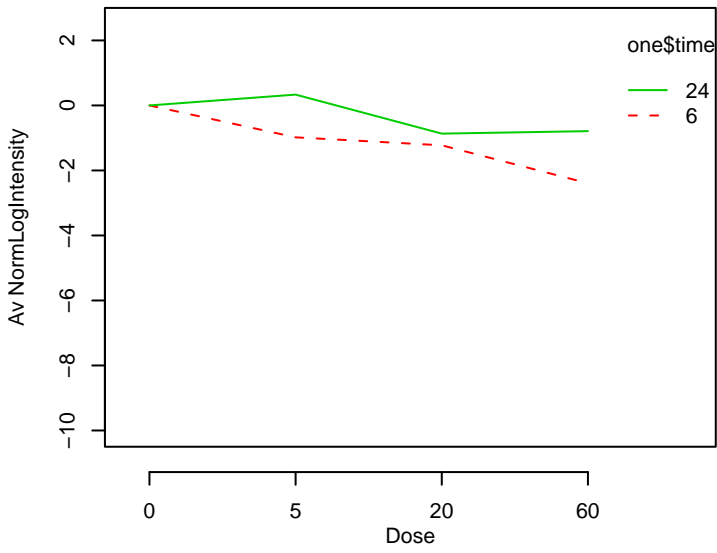

**GO\_0009060 : aerobic respiration**

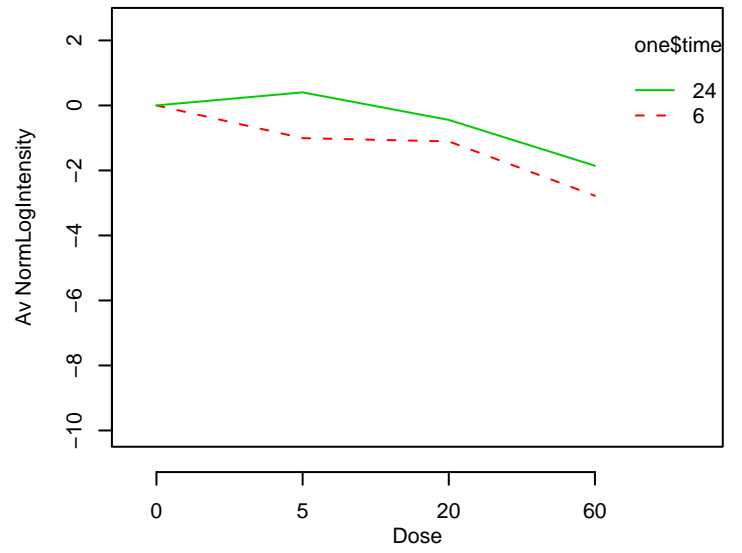

**GO\_0009063 : amino acid catabolism**

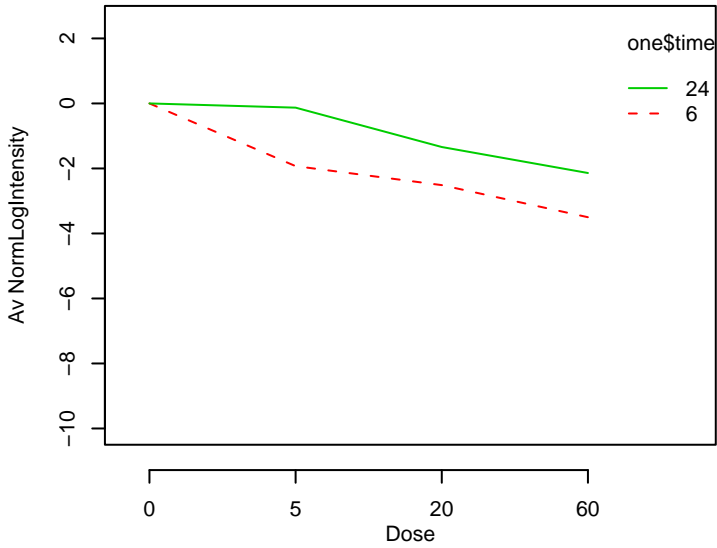

**GO\_0009064 : glutamine family amino acid metabolism**

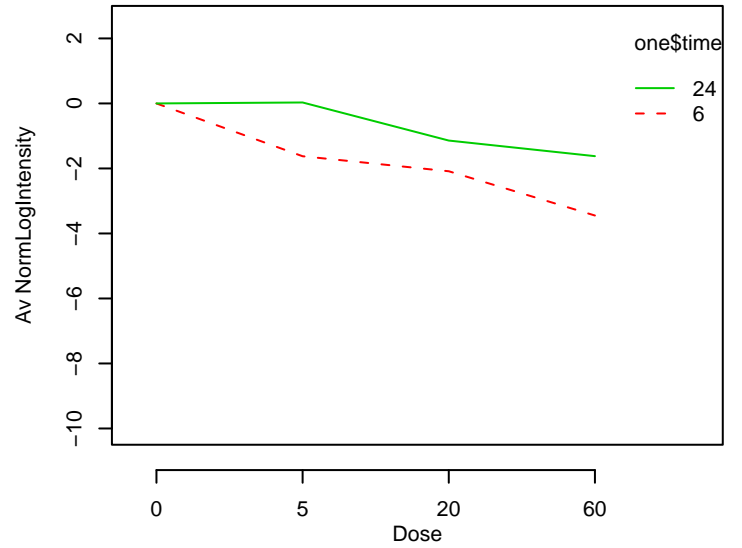

**GO\_0009065 : glutamine family amino acid catabolism**

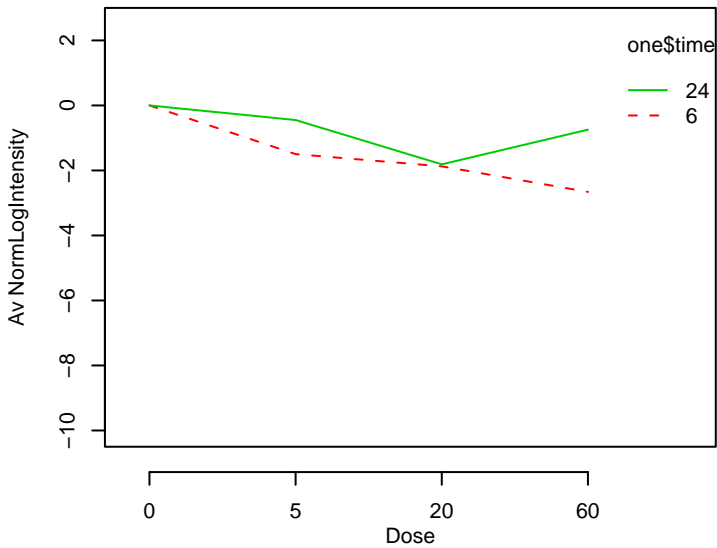

**GO\_0009066 : aspartate family amino acid metabolism**

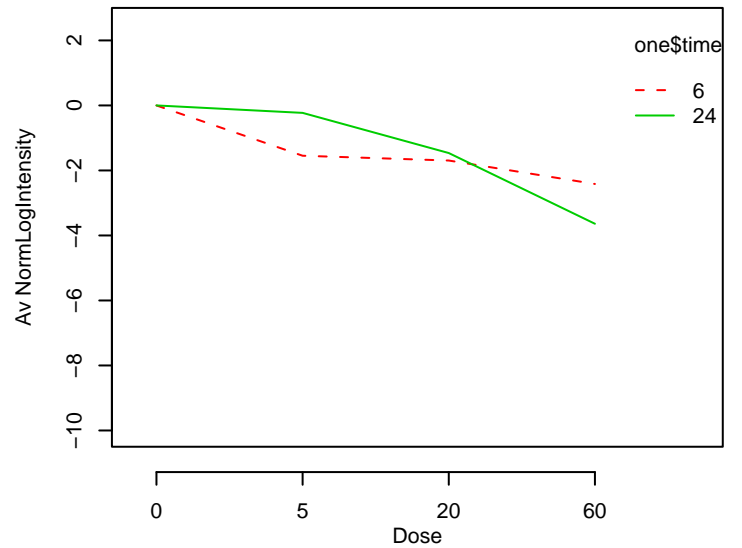

**GO\_0009067 : aspartate family amino acid biosynthesis**

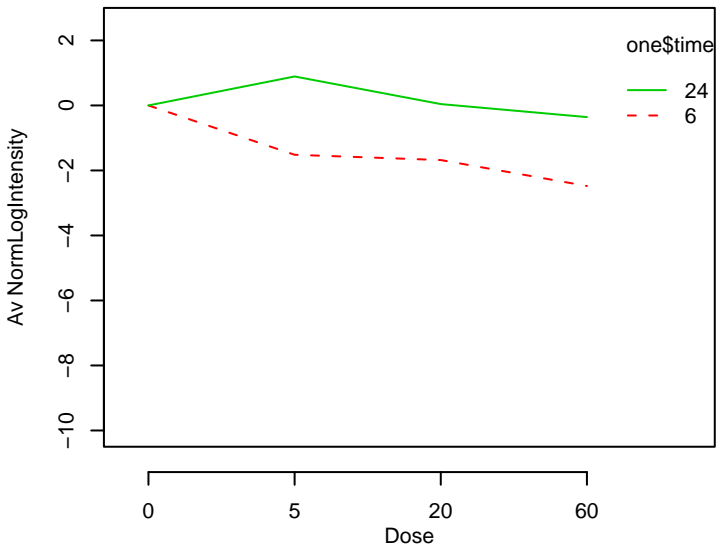

**GO\_0009068 : aspartate family amino acid catabolism**

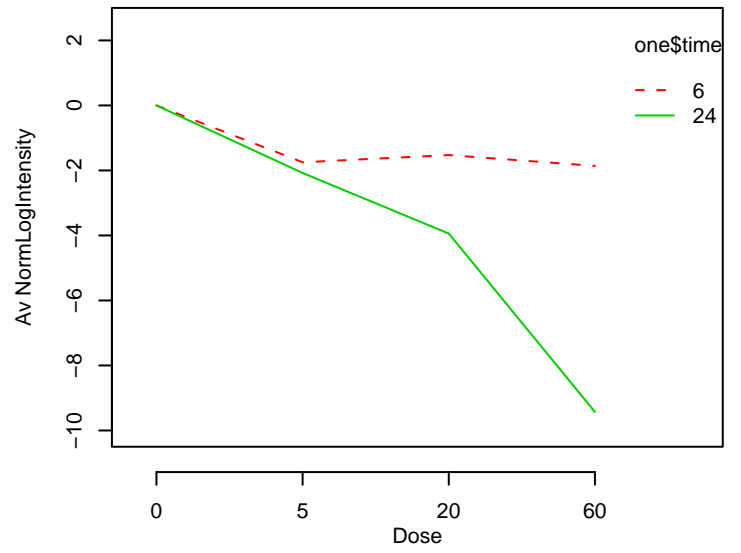

**GO\_0009069 : serine family amino acid metabolism**

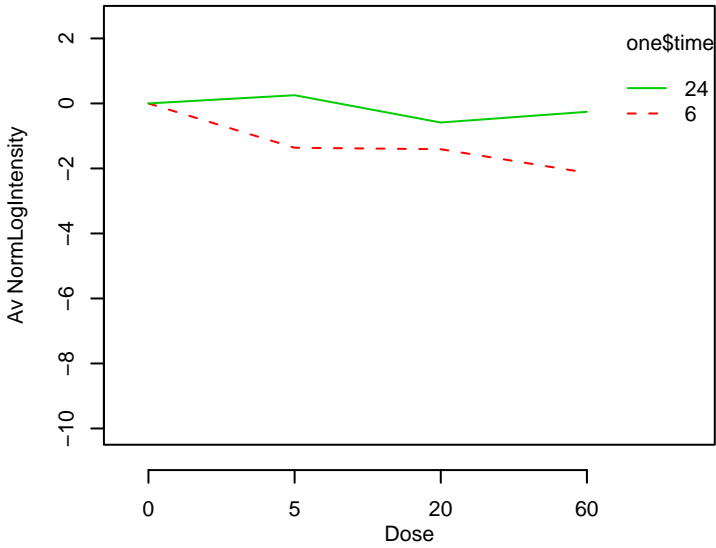

**GO\_0009070 : serine family amino acid biosynthesis**

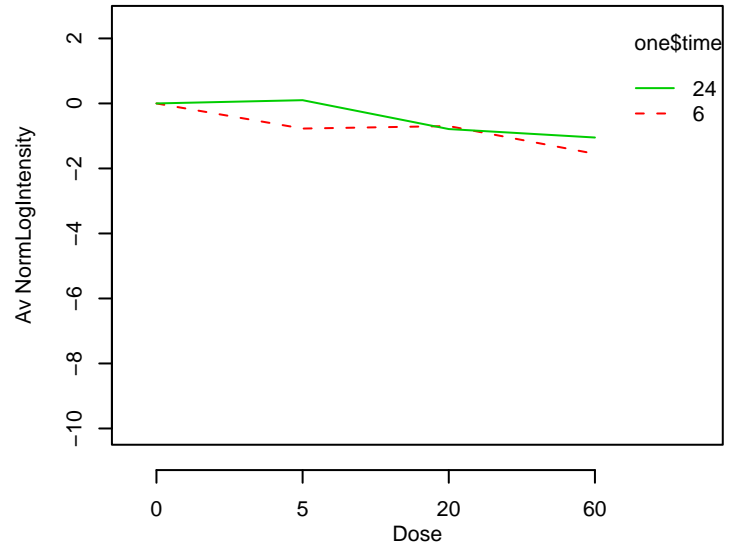

**GO\_0009071 : serine family amino acid catabolism**

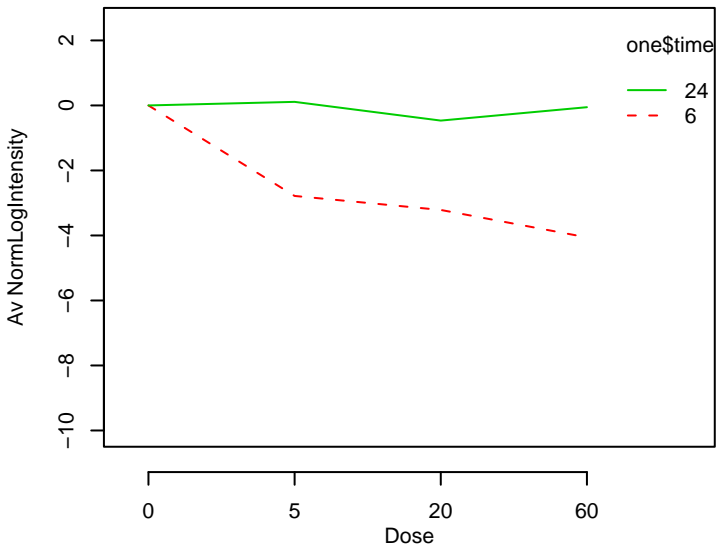

**GO\_0009072 : aromatic amino acid family metabolism**

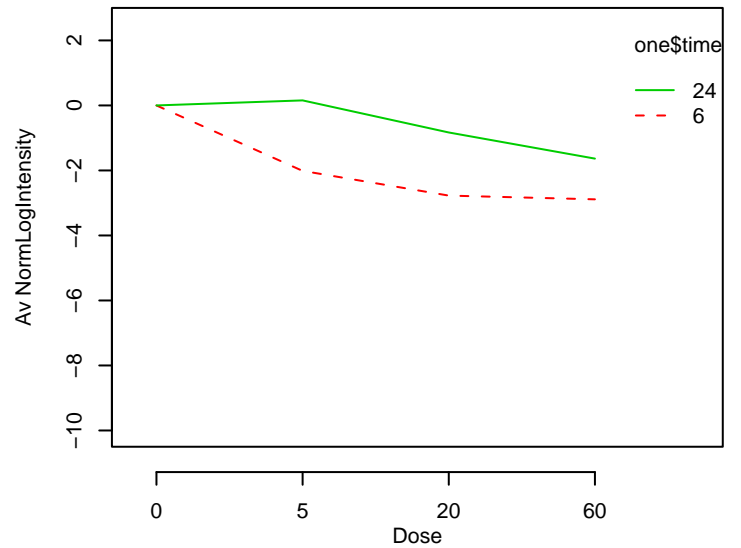

**GO\_0009074 : aromatic amino acid family catabolism**

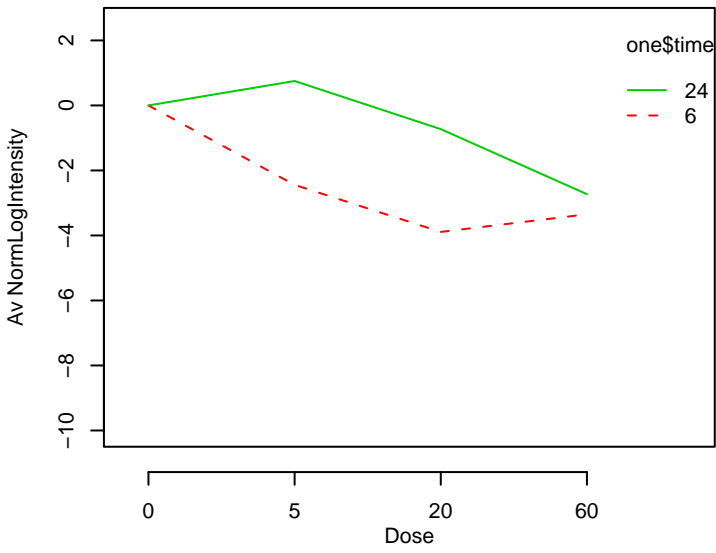

**GO\_0009075 : histidine family amino acid metabolism**

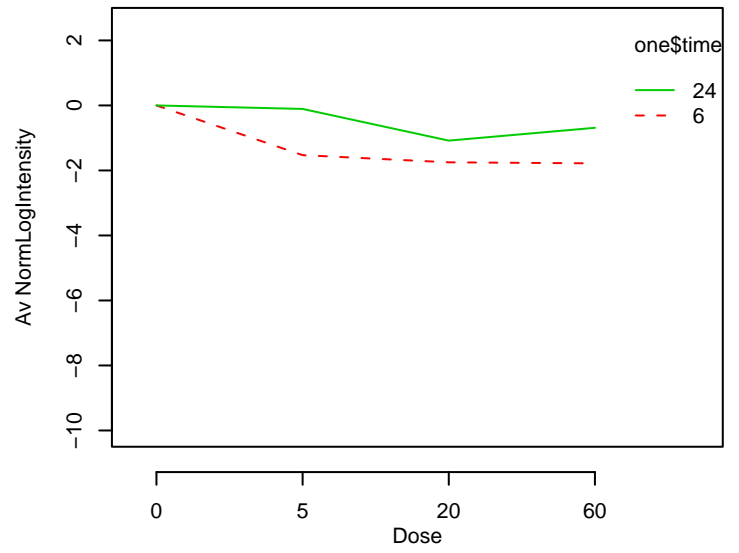

**GO\_0009077 : histidine family amino acid catabolism**

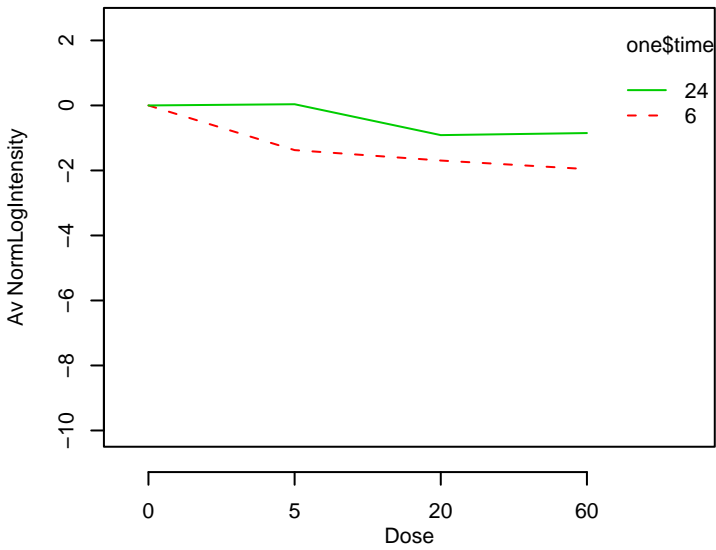

**GO\_0009081 : branched chain family amino acid metabolis**

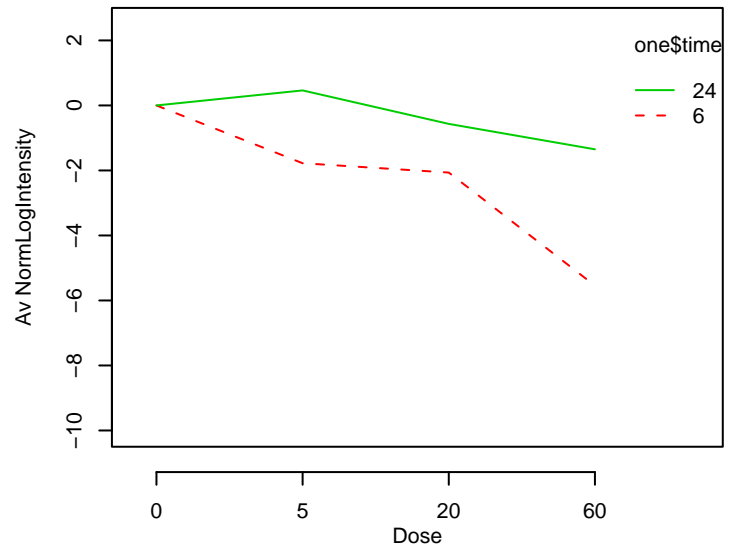

**GO\_0009083 : branched chain family amino acid catabolis**

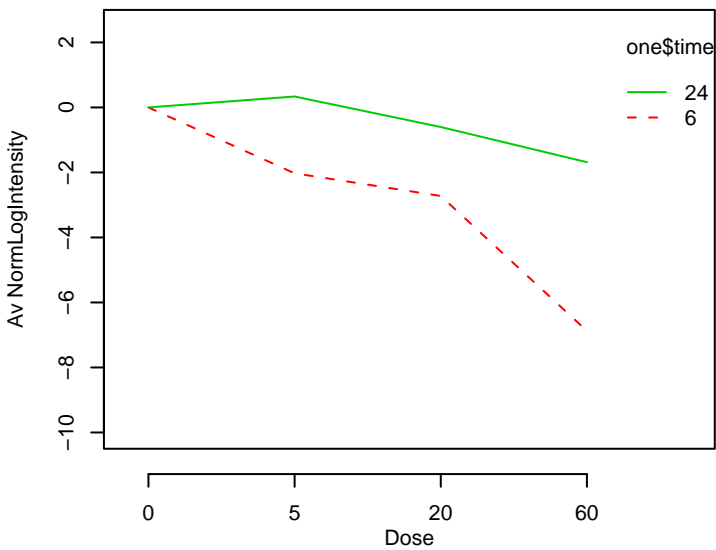

**GO\_0009084 : glutamine family amino acid biosynthesis**

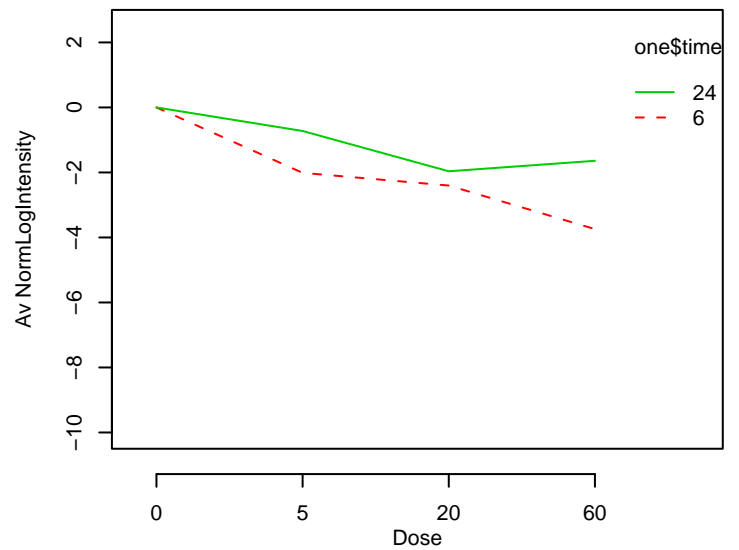

**GO\_0009086 : methionine biosynthesis**

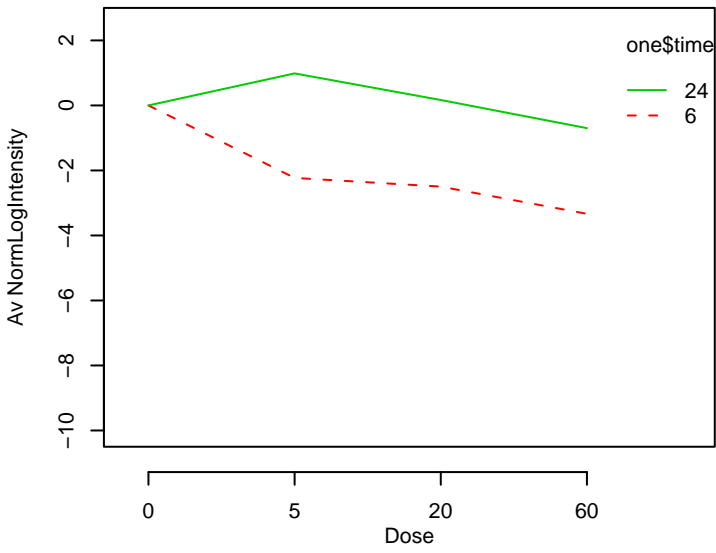

**GO\_0009100 : glycoprotein metabolism**

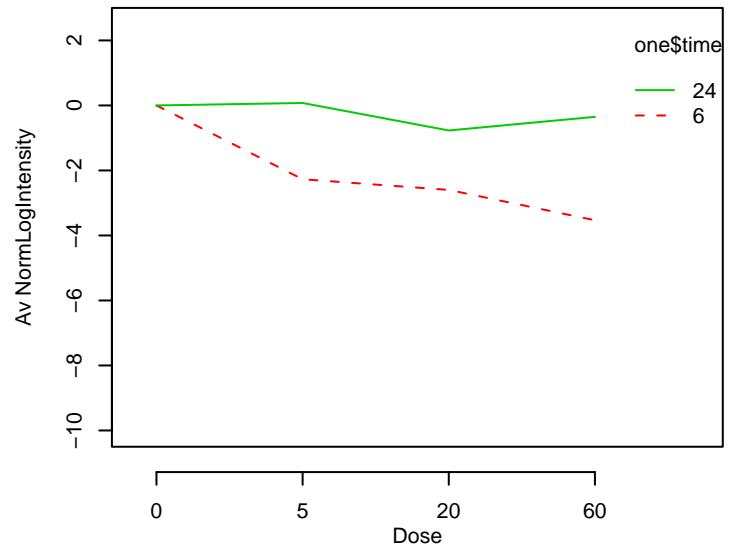

**GO\_0009101 : glycoprotein biosynthesis**

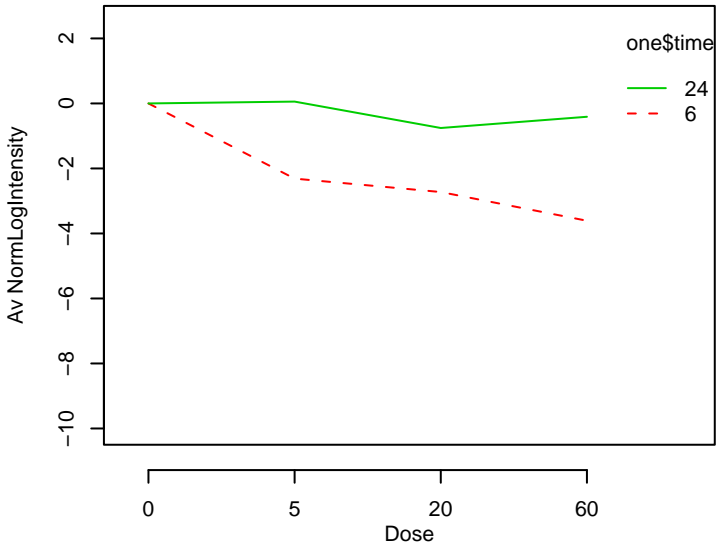

**GO\_0009103 : lipopolysaccharide biosynthesis**

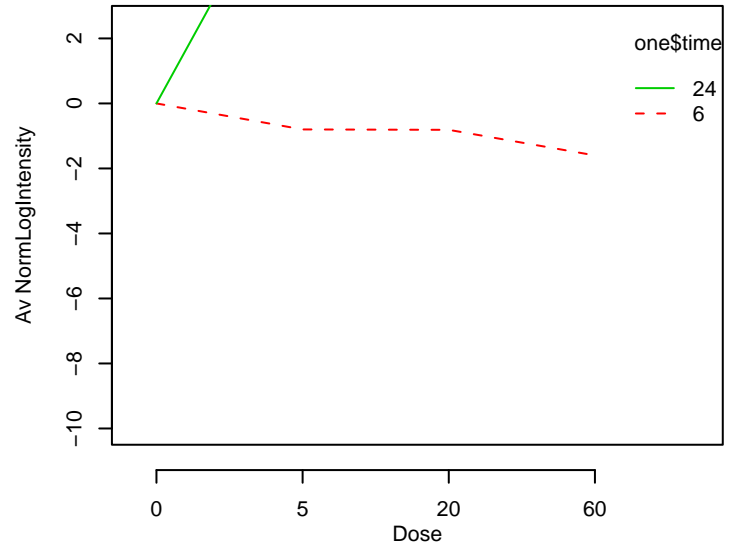

**GO\_0009108 : coenzyme biosynthesis**

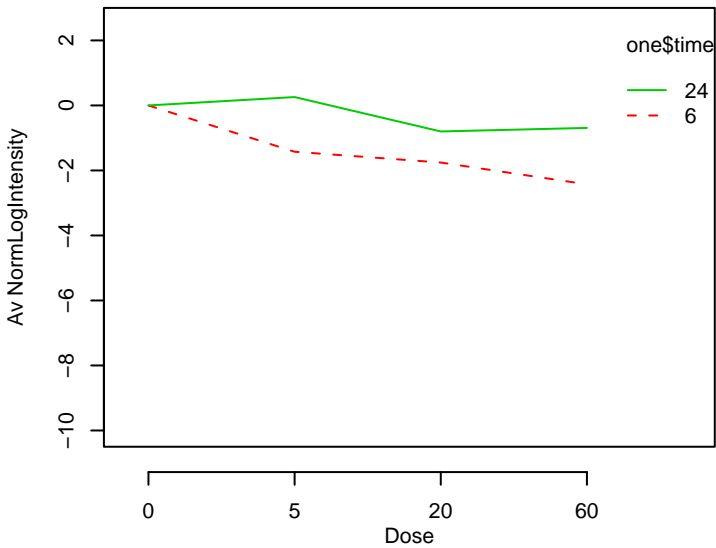

**GO\_0009109 : coenzyme catabolism**

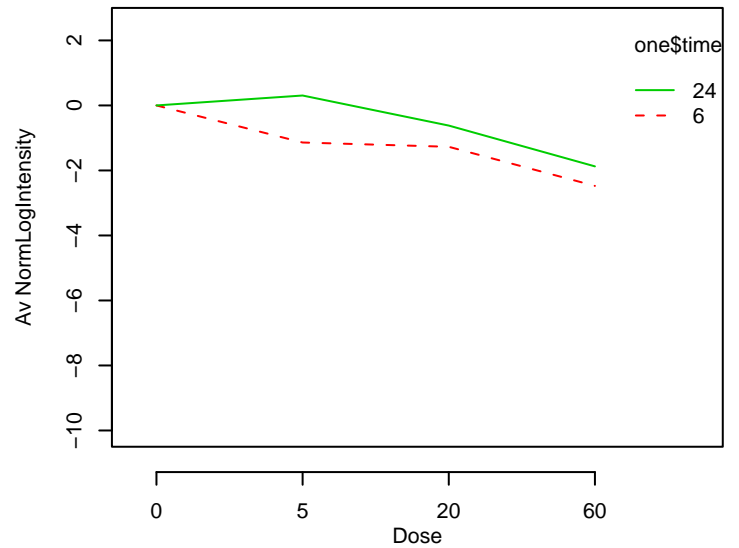

**GO\_0009110 : vitamin biosynthesis**

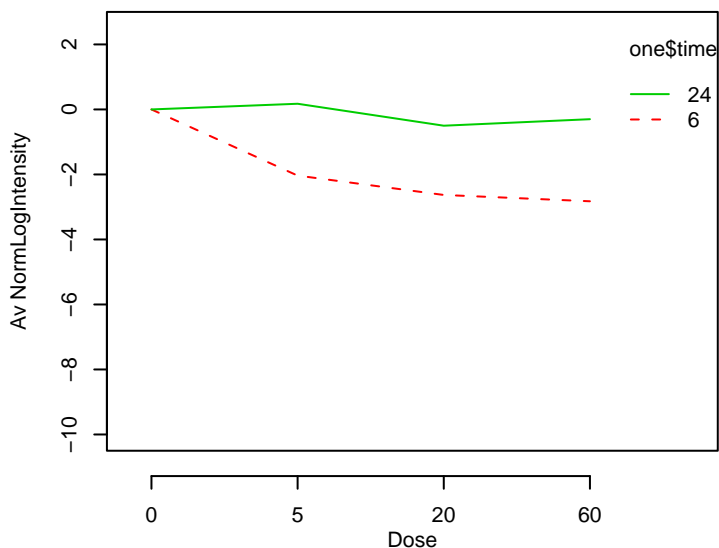

**GO\_0009112 : nucleobase metabolism**

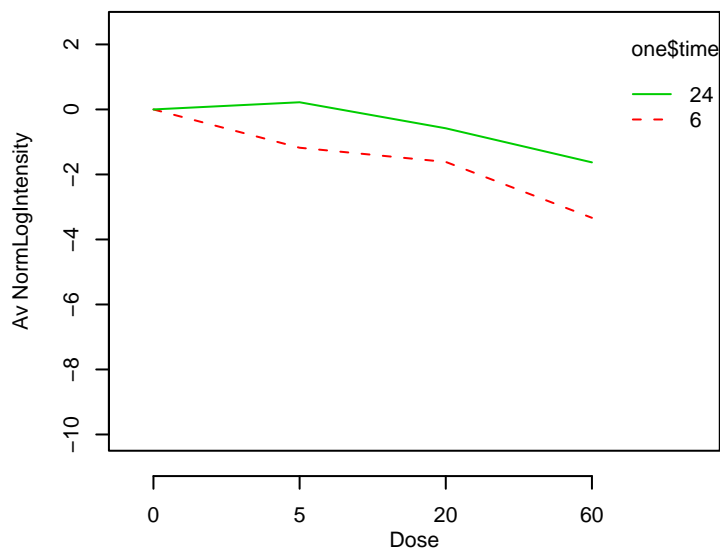

**GO\_0009116 : nucleoside metabolism**

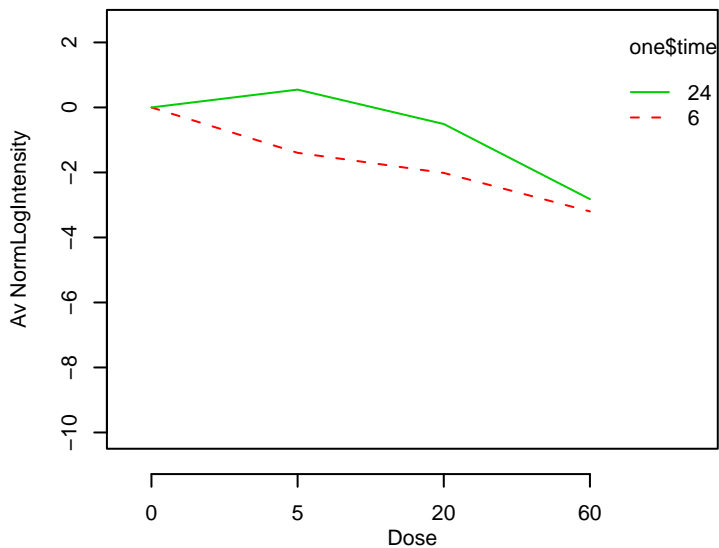

**GO\_0009117 : nucleotide metabolism**

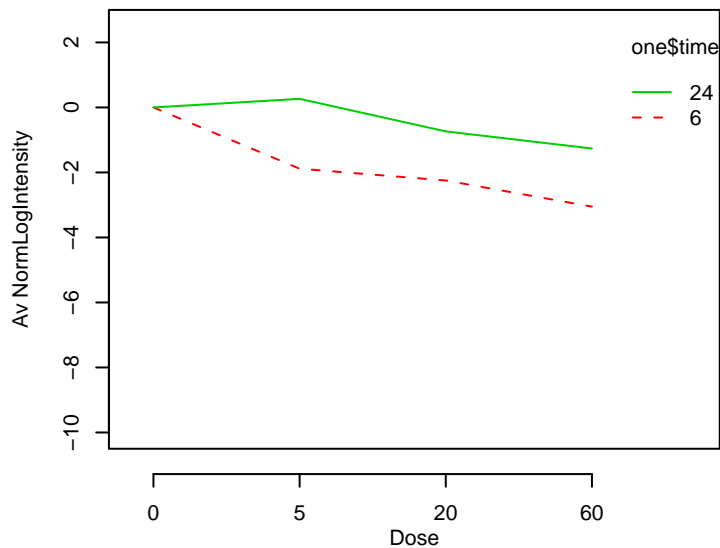

**GO\_0009119 : ribonucleoside metabolism**

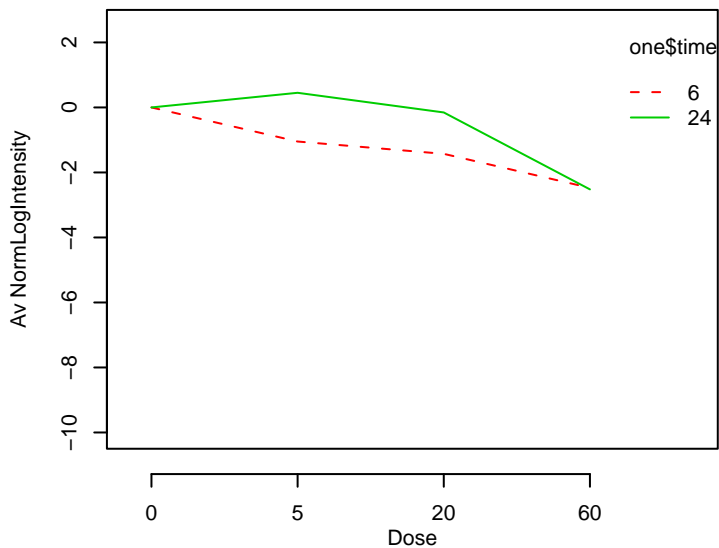

**GO\_0009120 : deoxyribonucleoside metabolism**

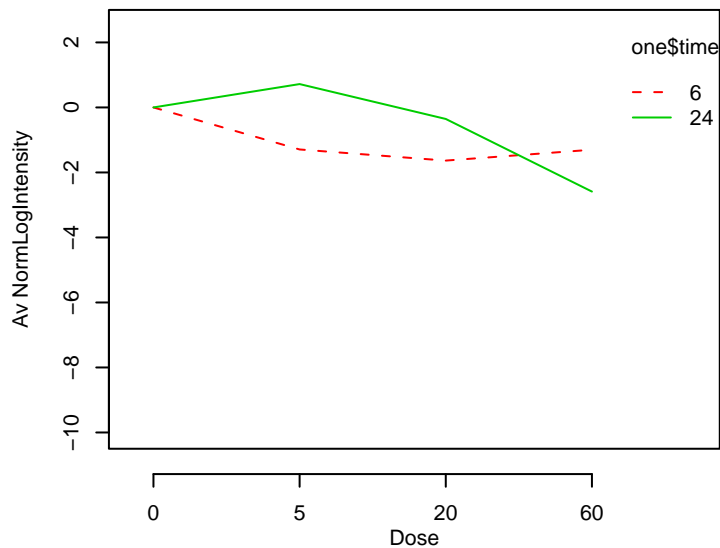

**GO\_0009123 : nucleoside monophosphate metabolism**

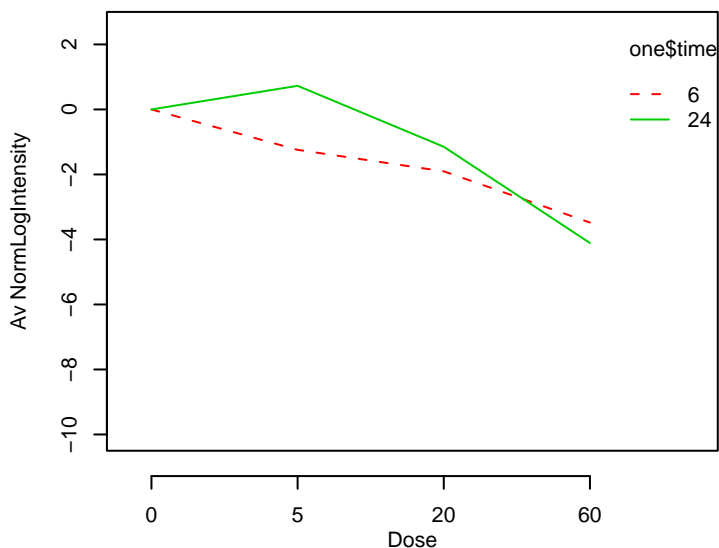

**GO\_0009124 : nucleoside monophosphate biosynthesis**

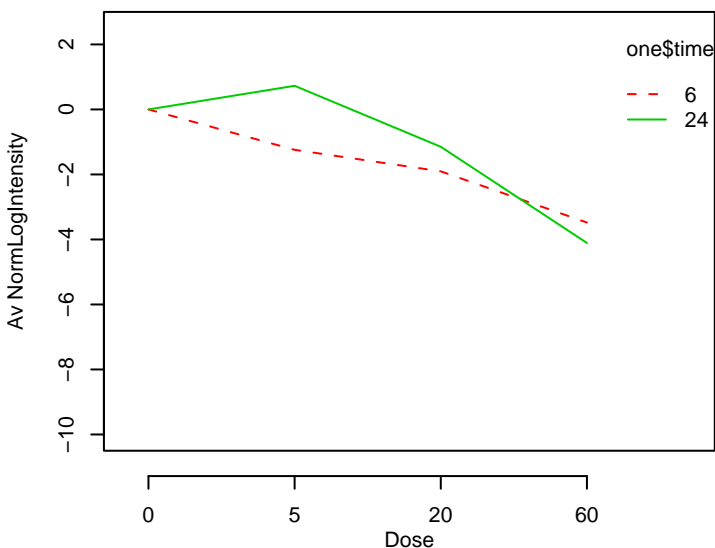

**GO\_0009126 : purine nucleoside monophosphate metabolism** **GO\_0009127 : purine nucleoside monophosphate biosynthesis**

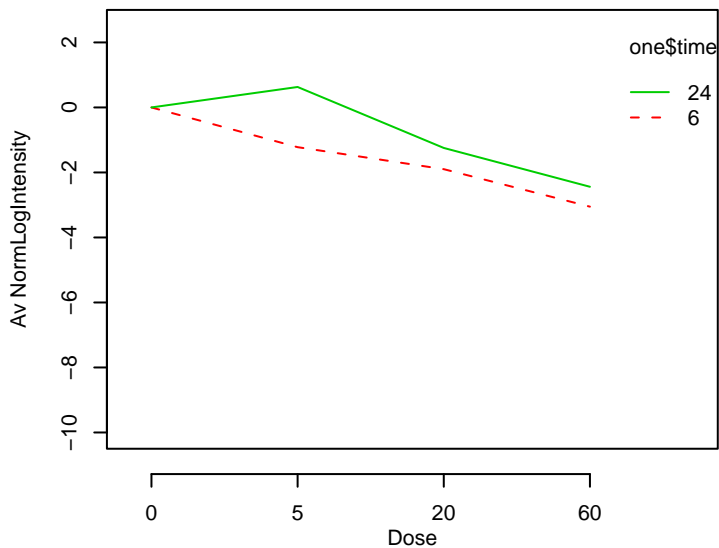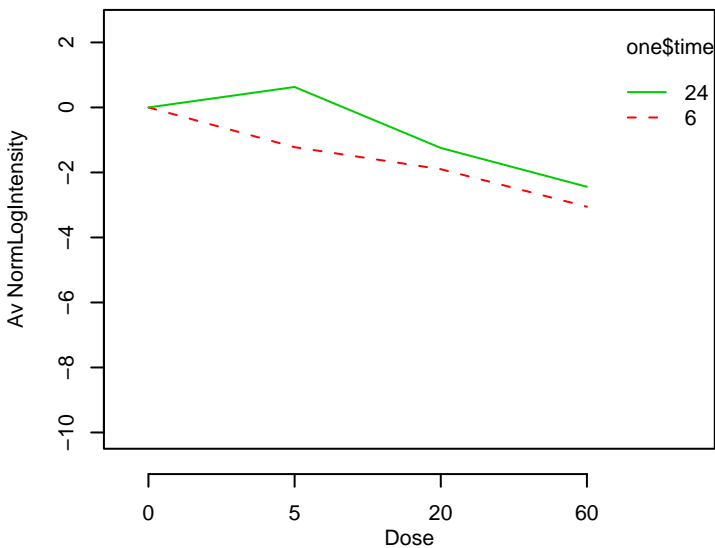

**GO\_0009132 : nucleoside diphosphate metabolism**

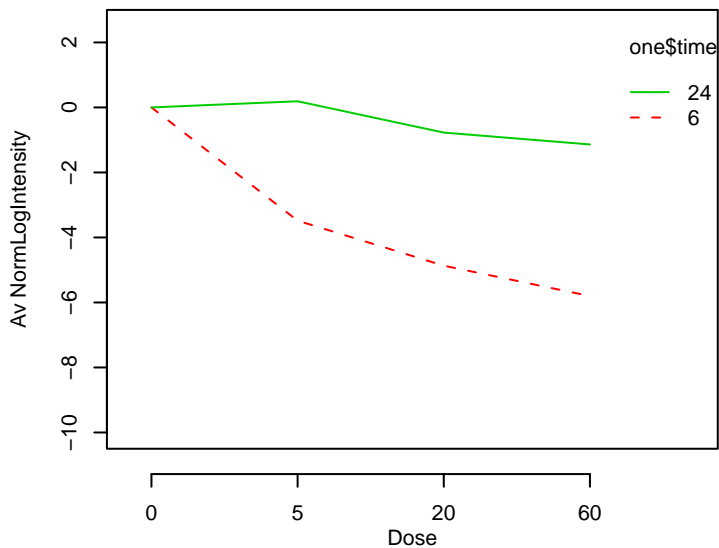

**GO\_0009134 : nucleoside diphosphate catabolism**

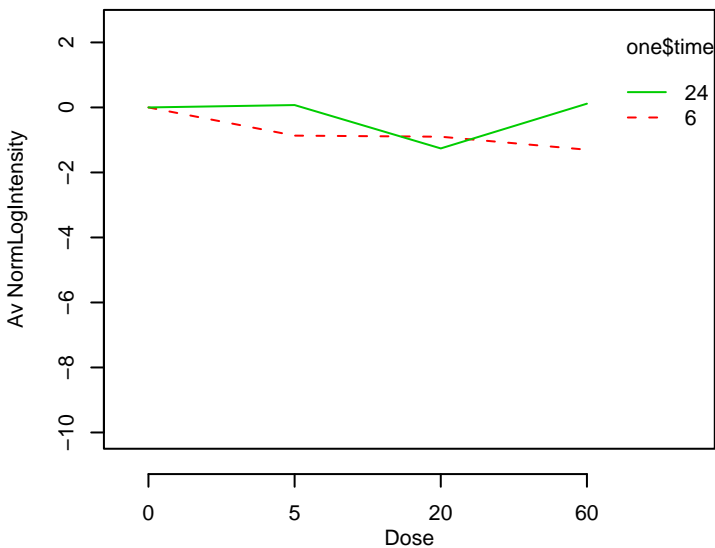



**GO\_0009135 : purine nucleoside diphosphate metabolism**

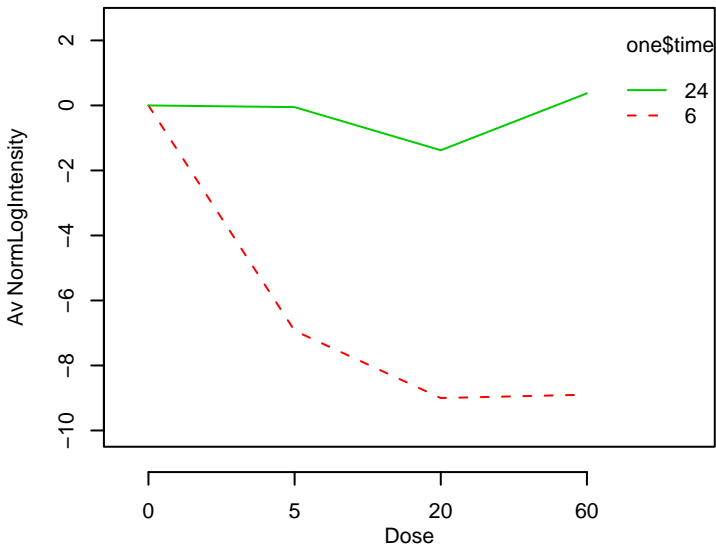

**GO\_0009141 : nucleoside triphosphate metabolism**

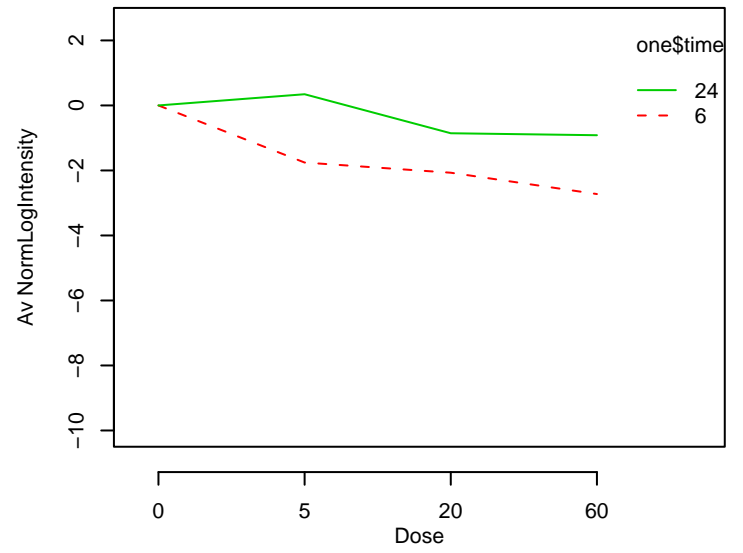

**GO\_0009142 : nucleoside triphosphate biosynthesis**

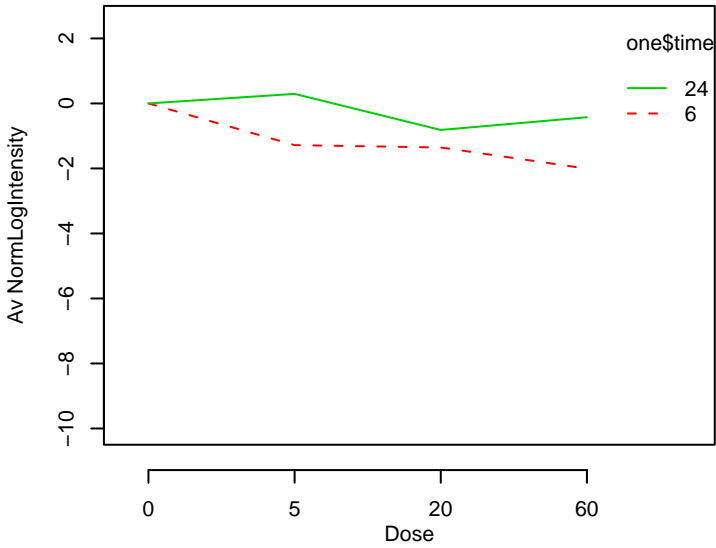

**GO\_0009144 : purine nucleoside triphosphate metabolism**

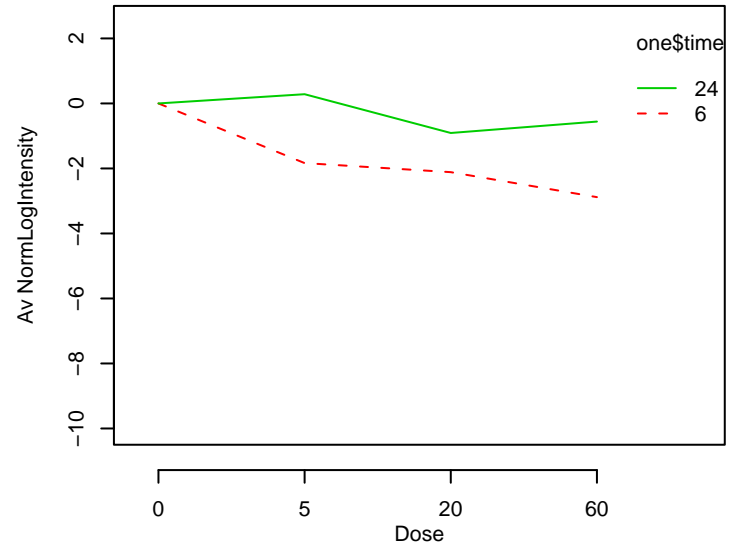

**GO\_0009145 : purine nucleoside triphosphate biosynthesis** **GO\_0009147 : pyrimidine nucleoside triphosphate metabolism**

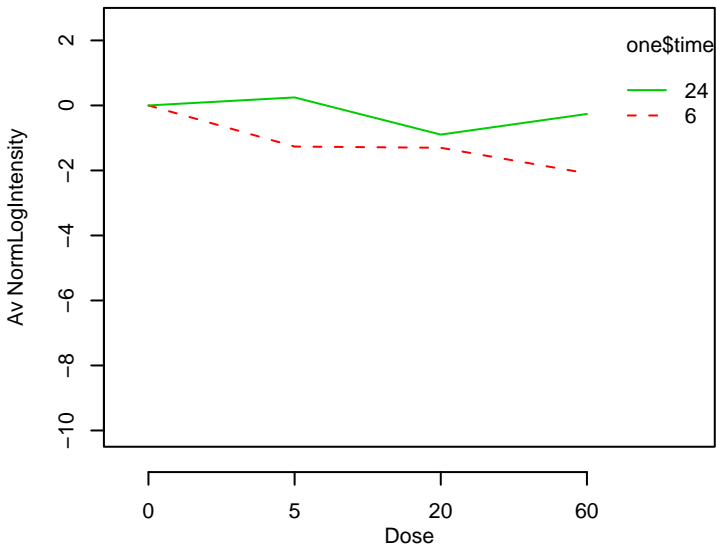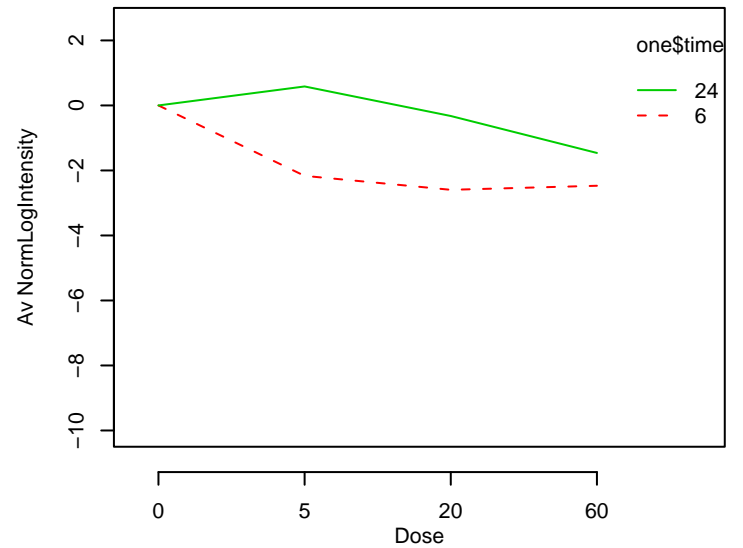

**GO\_0009150 : purine ribonucleotide metabolism**

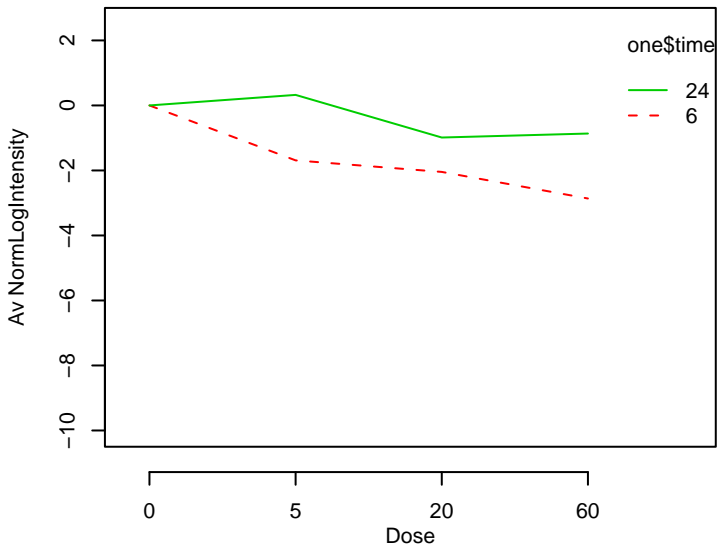

**GO\_0009152 : purine ribonucleotide biosynthesis**

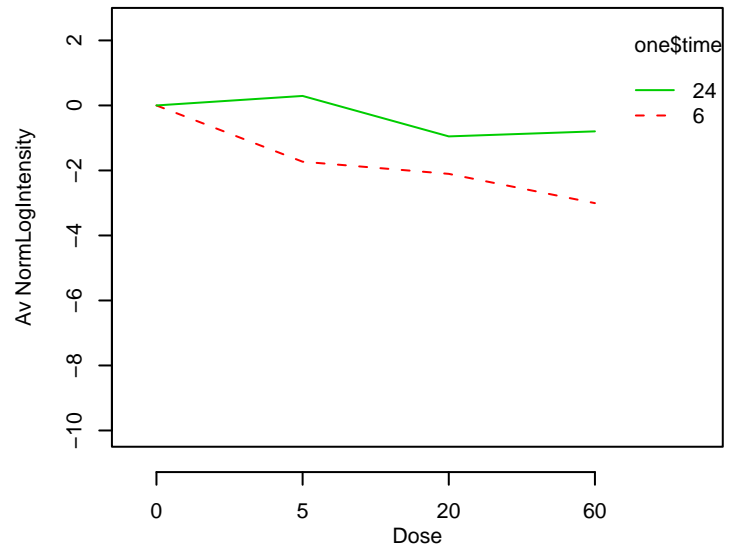

**GO\_0009154 : purine ribonucleotide catabolism**

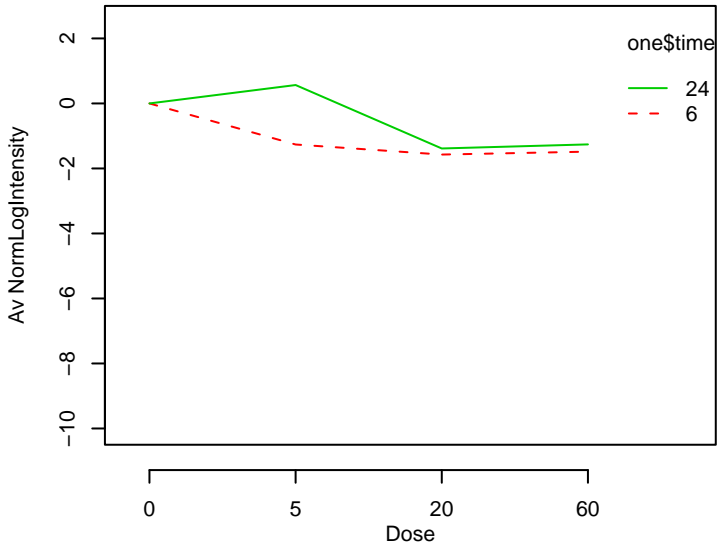

**GO\_0009156 : ribonucleoside monophosphate biosynthesis**

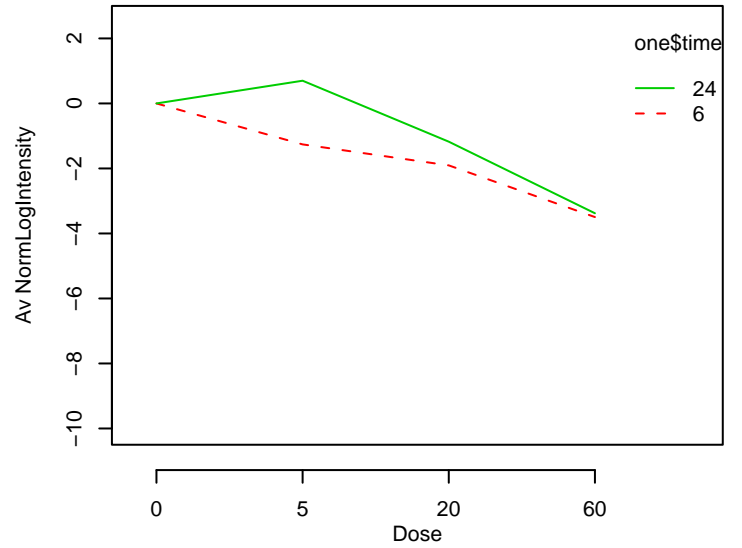

**GO\_0009161 : ribonucleoside monophosphate metabolism**

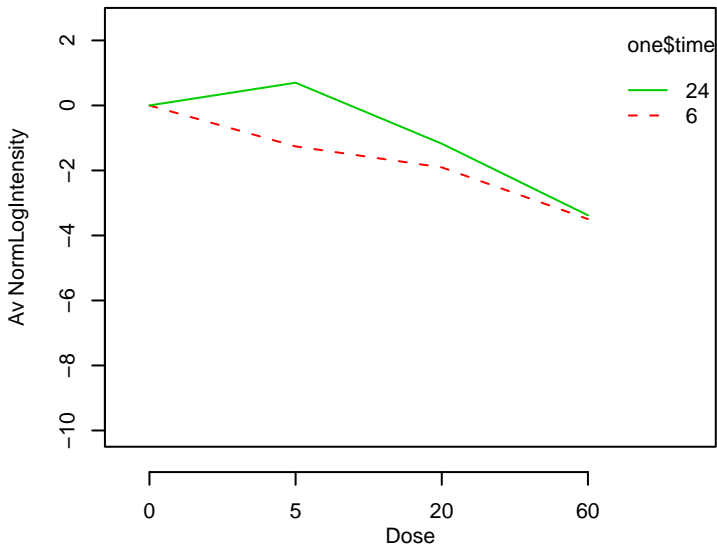

**GO\_0009165 : nucleotide biosynthesis**

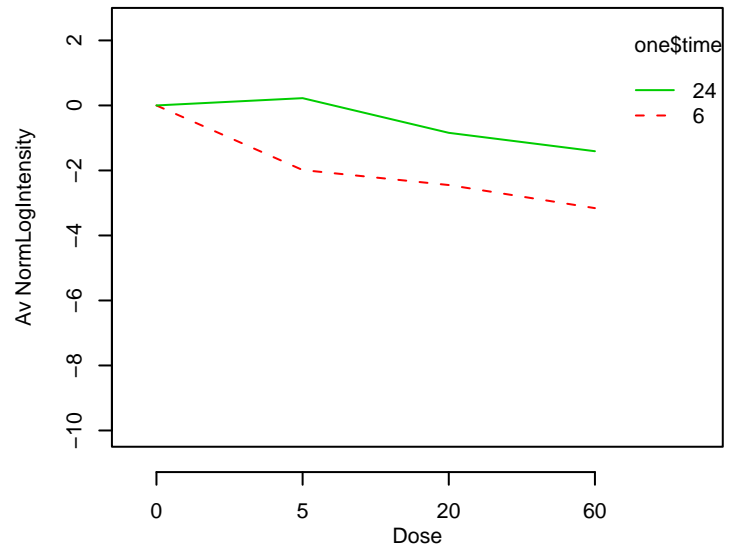

**GO\_0009166 : nucleotide catabolism**

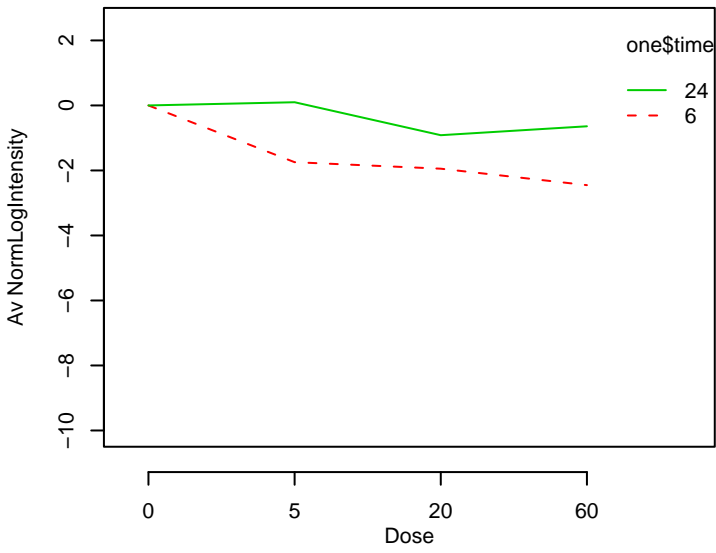

**GO\_0009167 : purine ribonucleoside monophosphate metabo**

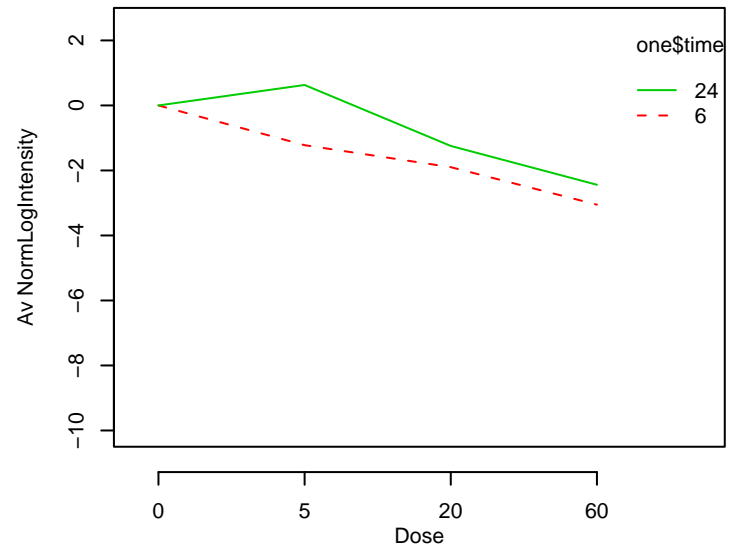

**GO\_0009168 : purine ribonucleoside monophosphate biosynt**      **GO\_0009179 : purine ribonucleoside diphosphate metaboli**

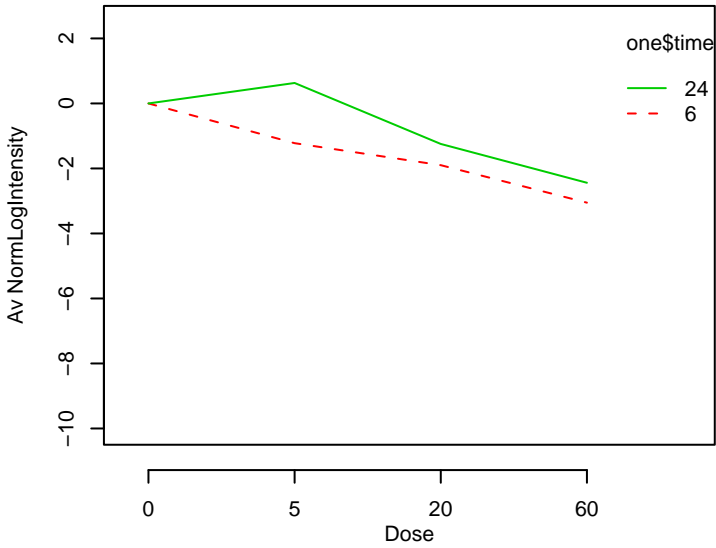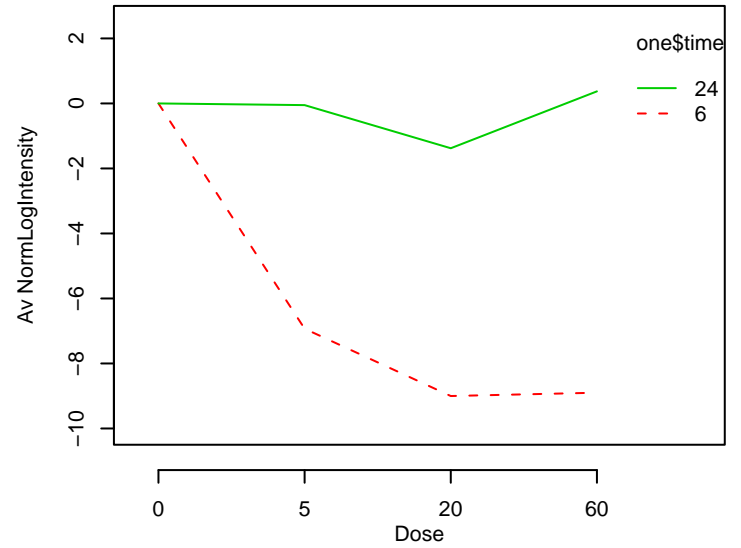

**GO\_0009185 : ribonucleoside diphosphate metabolism**

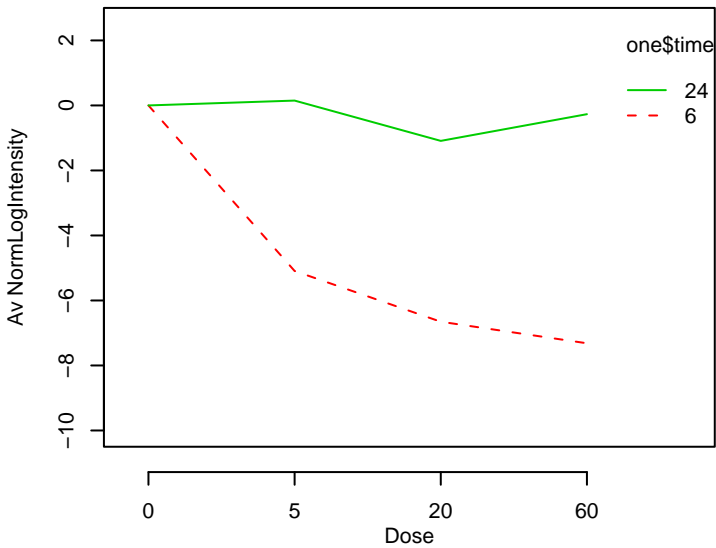

**GO\_0009187 : cyclic nucleotide metabolism**

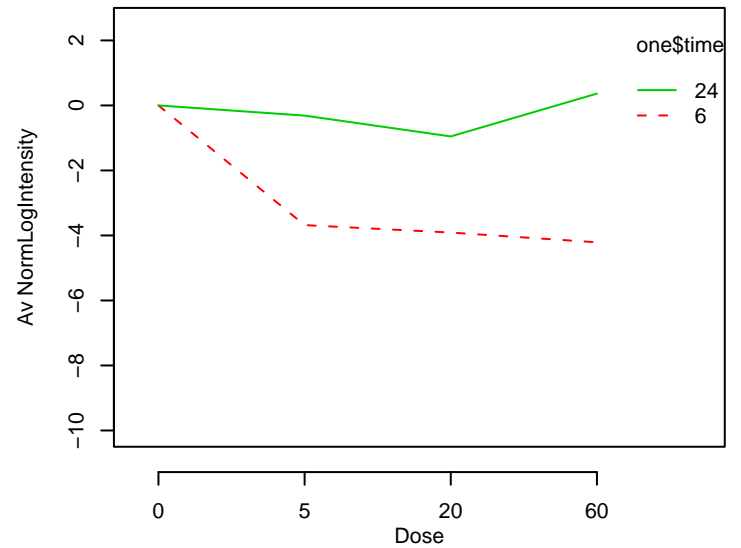

**GO\_0009190 : cyclic nucleotide biosynthesis**

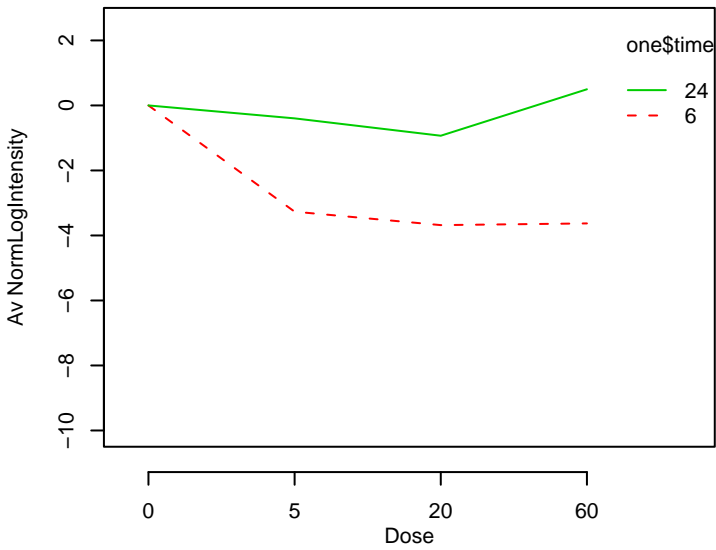

**GO\_0009191 : ribonucleoside diphosphate catabolism**

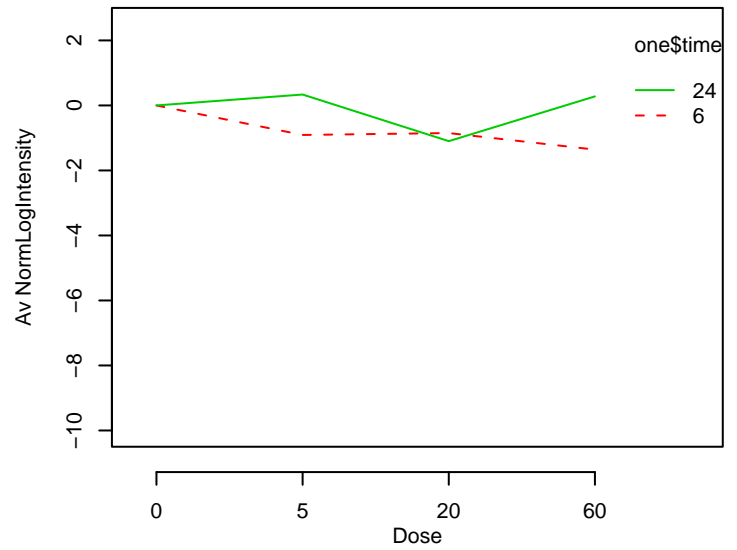

**GO\_0009199 : ribonucleoside triphosphate metabolism**

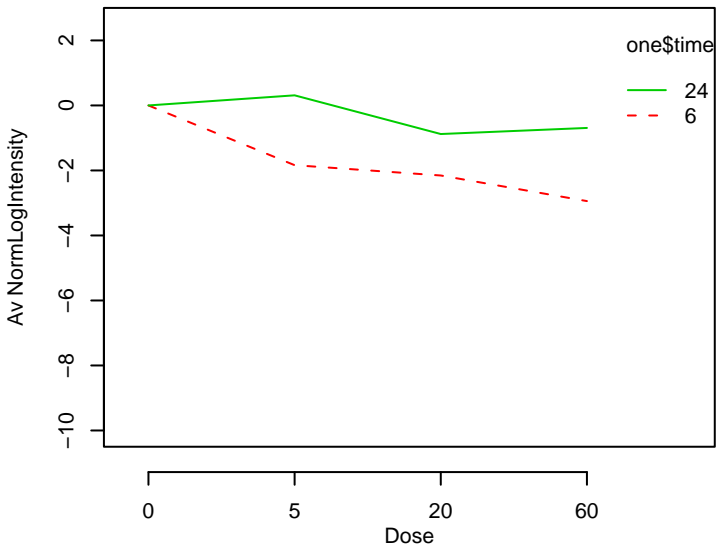

**GO\_0009200 : deoxyribonucleoside triphosphate metabolism**

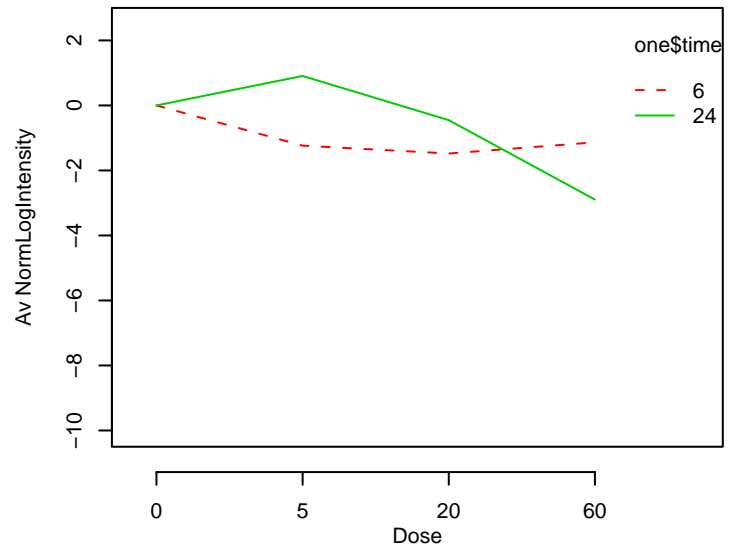

**GO\_0009201 : ribonucleoside triphosphate biosynthesis**

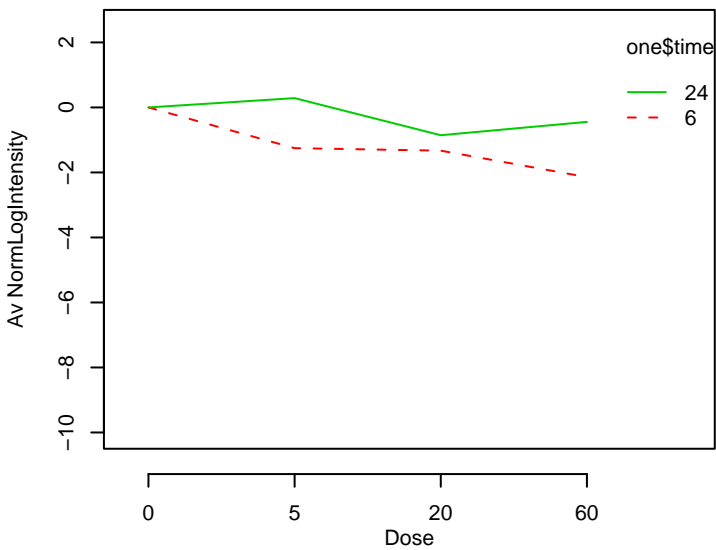

**GO\_0009205 : purine ribonucleoside triphosphate metabolism**

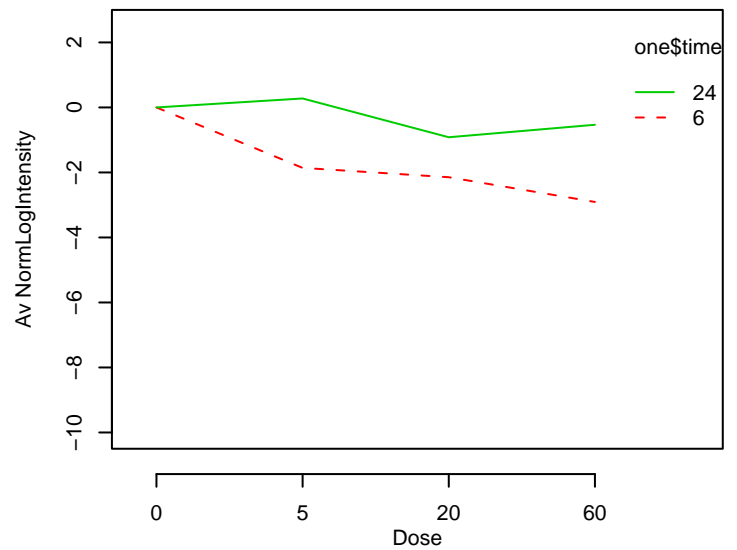

**GO\_0009206 : purine ribonucleoside triphosphate biosynthesis** **GO\_0009208 : pyrimidine ribonucleoside triphosphate metabolism**

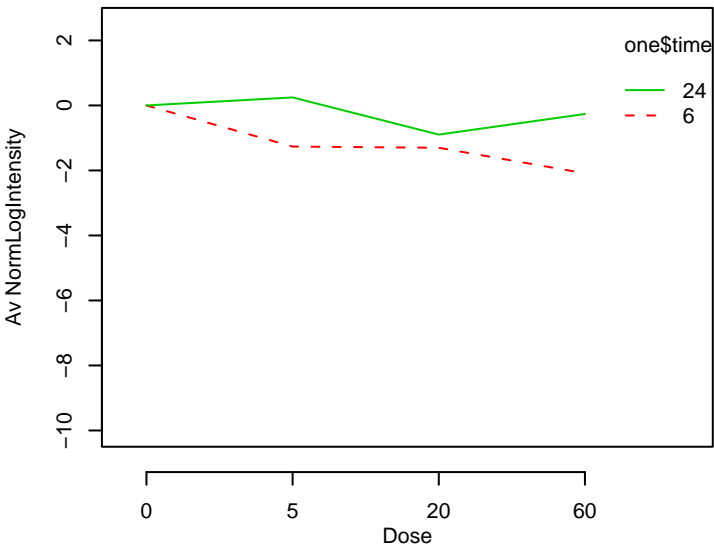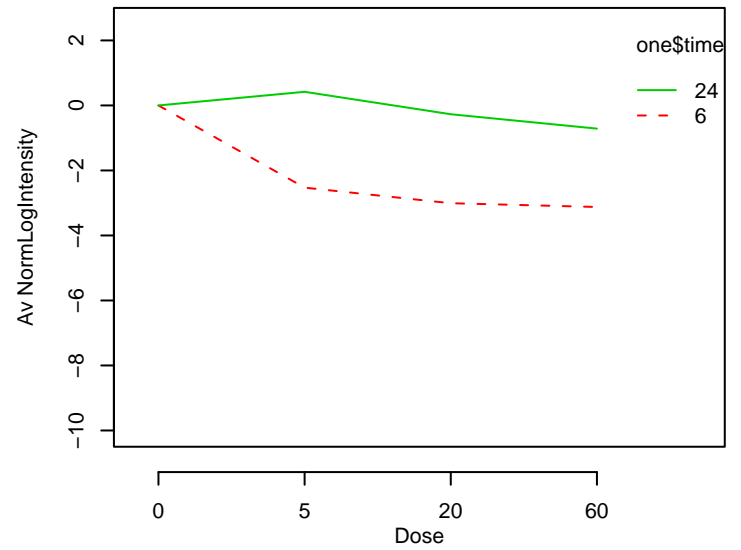

**GO\_0009209 : pyrimidine ribonucleoside triphosphate biosynthesis** **GO\_0009211 : pyrimidine deoxyribonucleoside triphosphate metabolism**

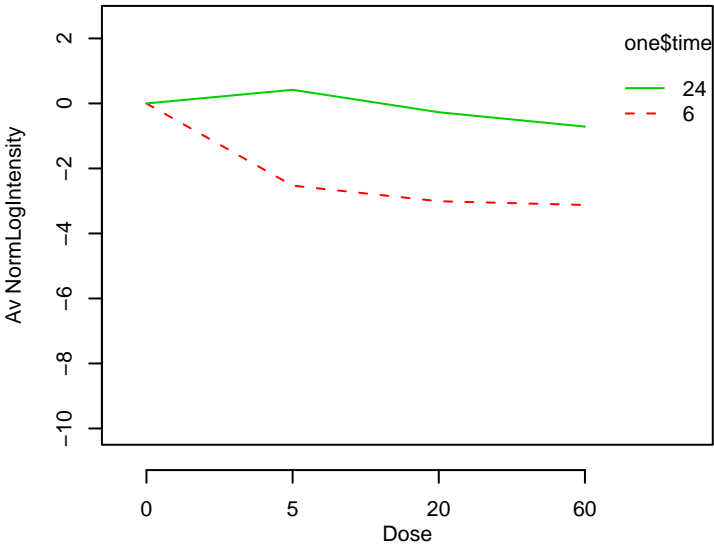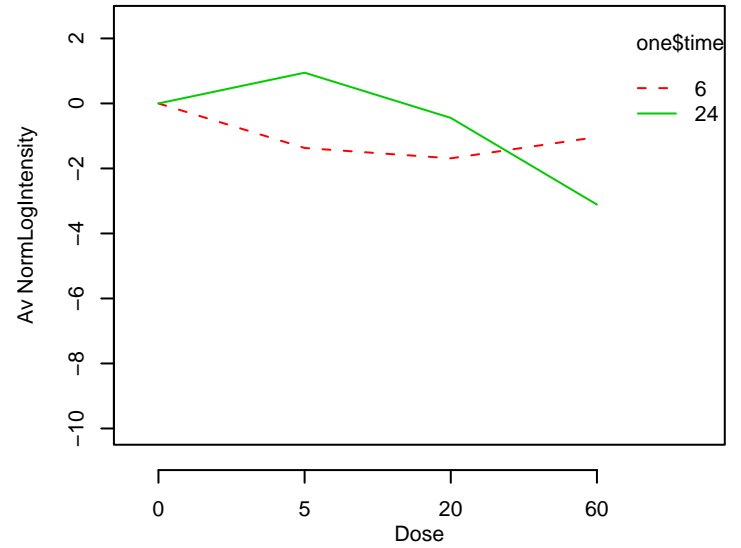

**GO\_0009218 : pyrimidine ribonucleotide metabolism**

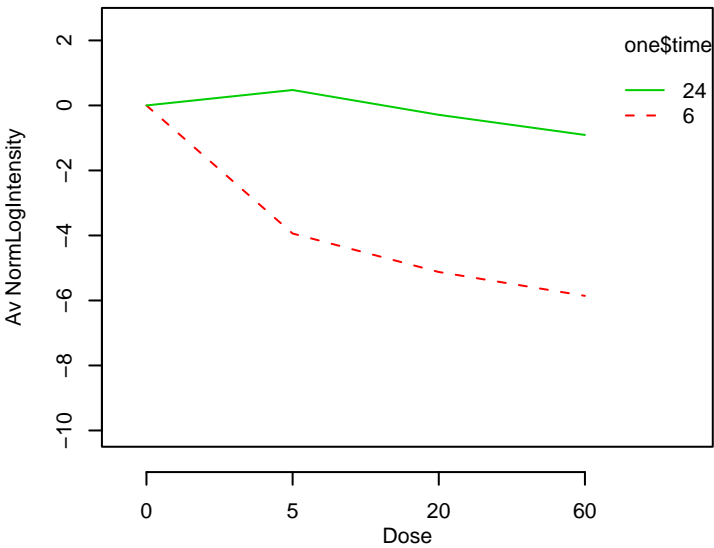

**GO\_0009219 : pyrimidine deoxyribonucleotide metabolism**

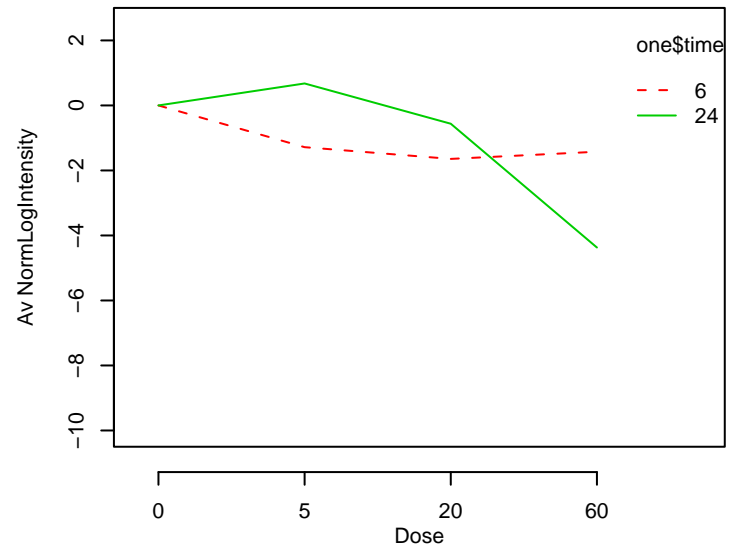

**GO\_0009220 : pyrimidine ribonucleotide biosynthesis**

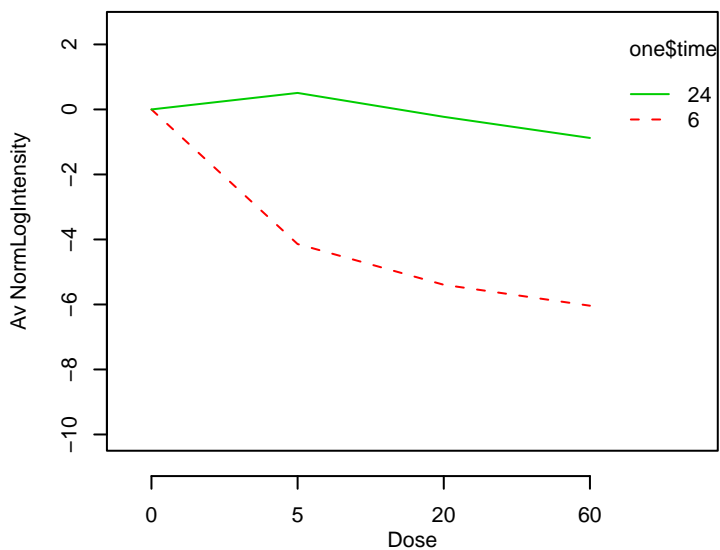

**GO\_0009225 : nucleotide-sugar metabolism**

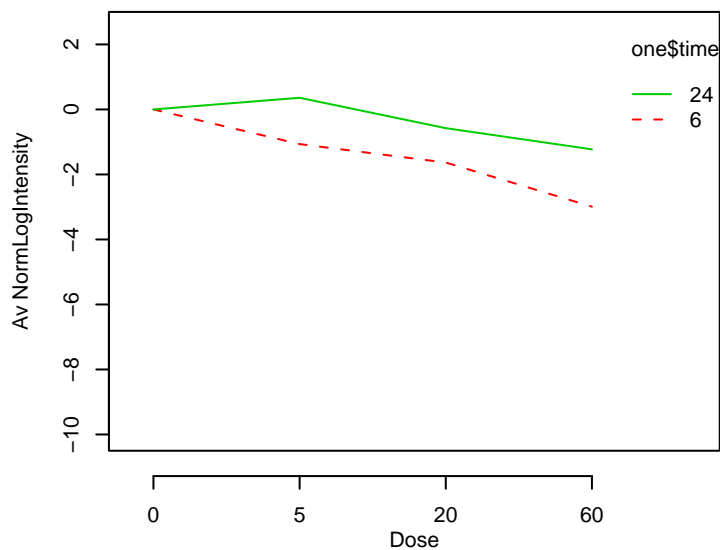

**GO\_0009247 : glycolipid biosynthesis**

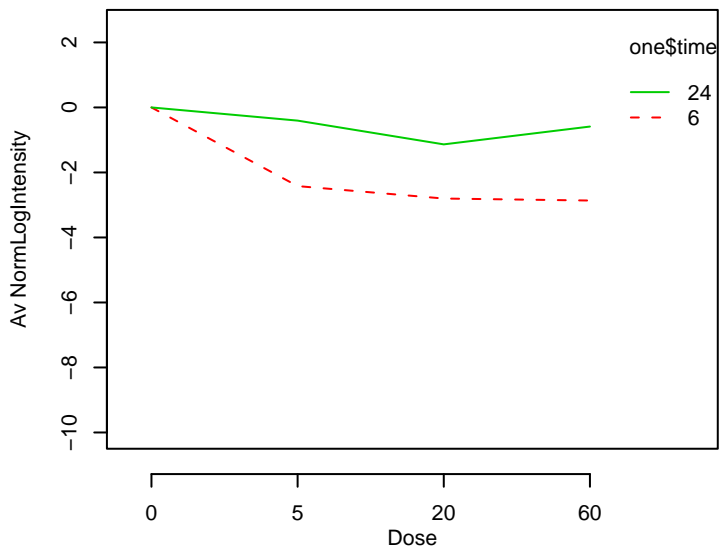

**GO\_0009250 : glucan biosynthesis**

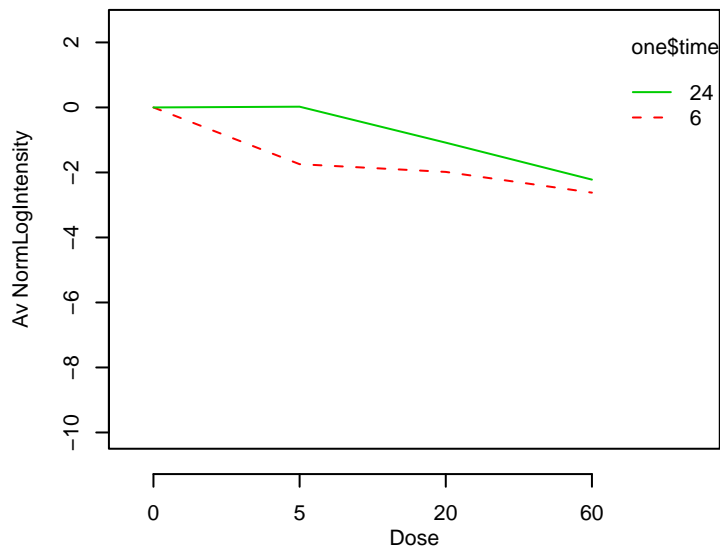

**GO\_0009251 : glucan catabolism**

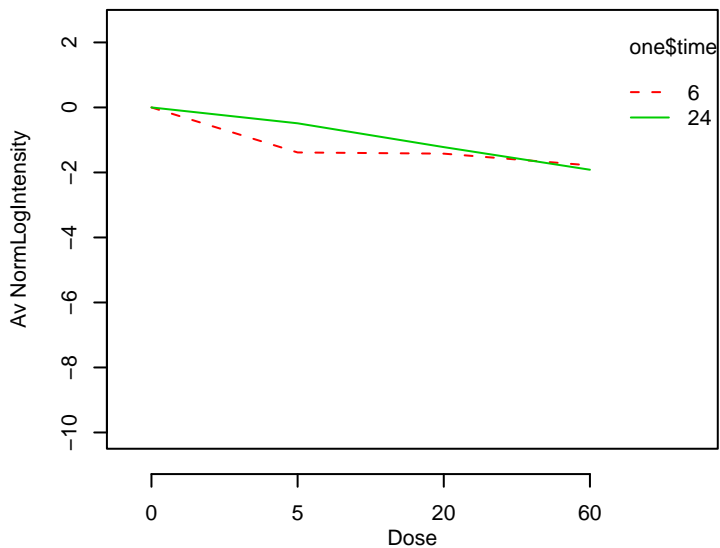

**GO\_0009253 : peptidoglycan catabolism**

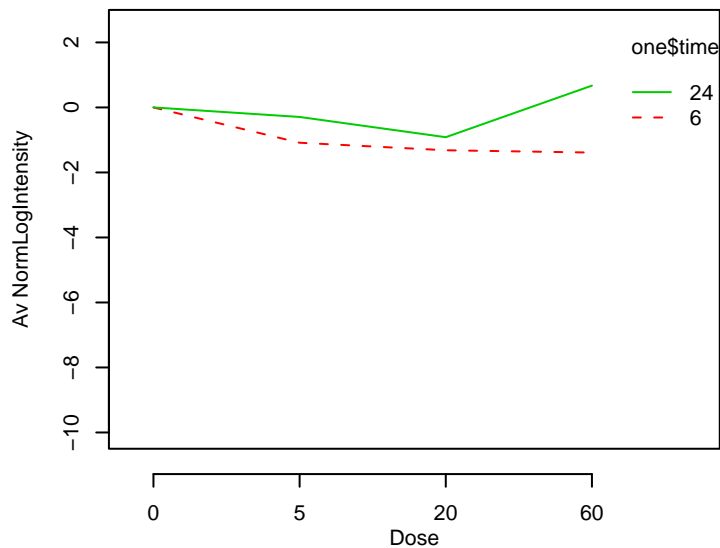

**GO\_0009259 : ribonucleotide metabolism**

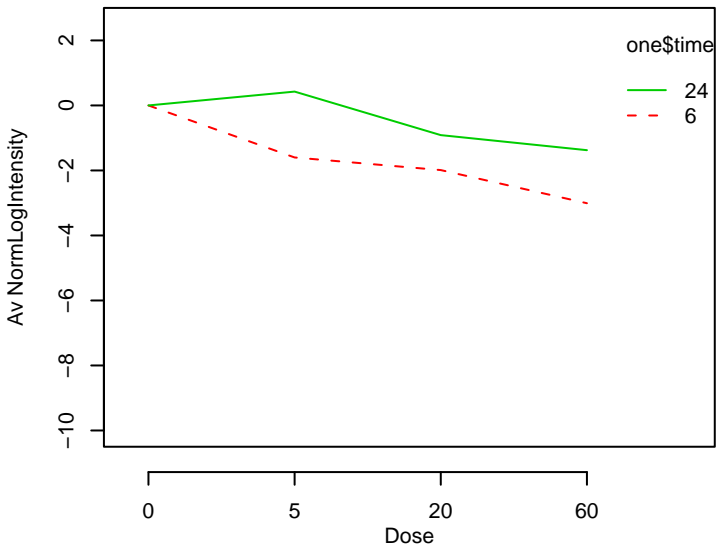

**GO\_0009260 : ribonucleotide biosynthesis**

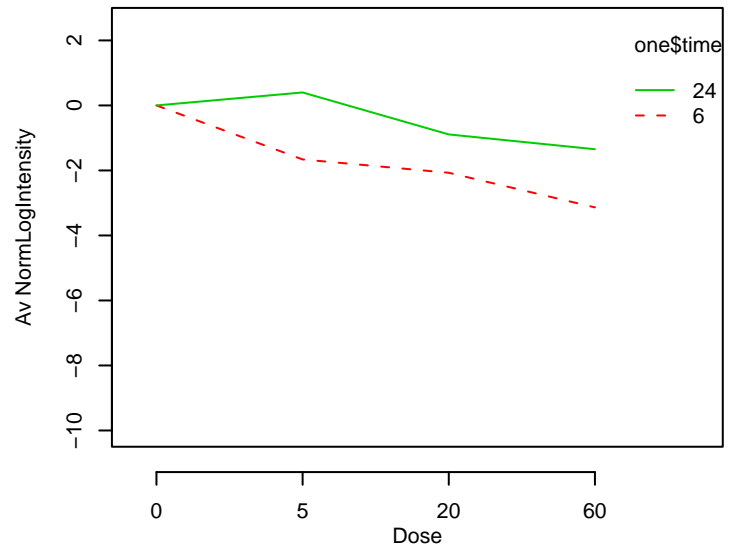

**GO\_0009261 : ribonucleotide catabolism**

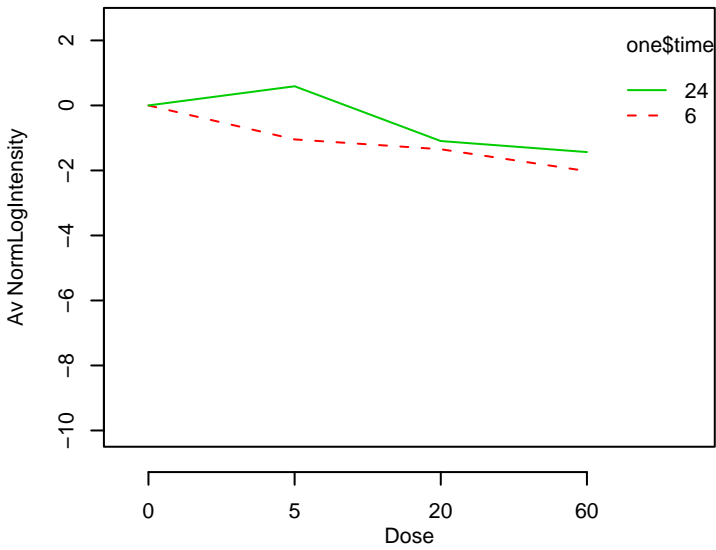

**GO\_0009262 : deoxyribonucleotide metabolism**

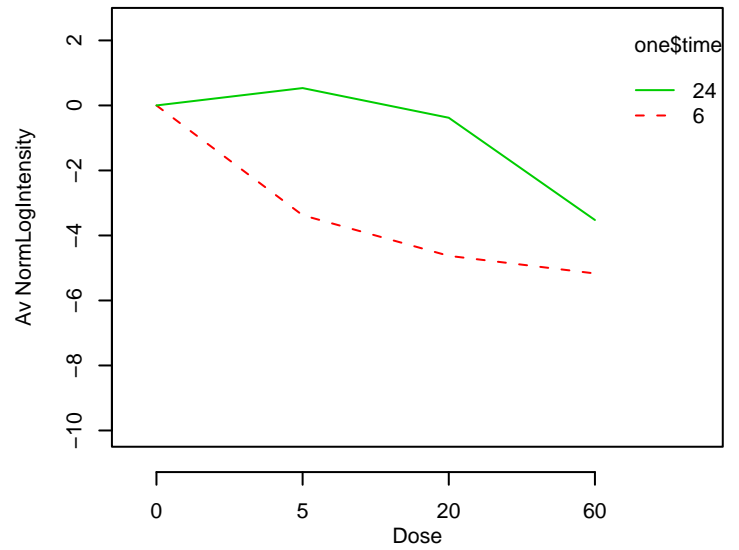

**GO\_0009263 : deoxyribonucleotide biosynthesis**

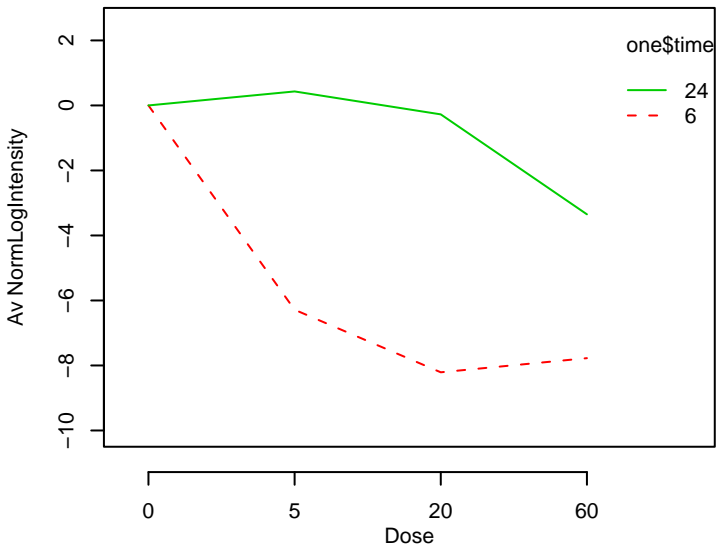

**GO\_0009266 : response to temperature stimulus**

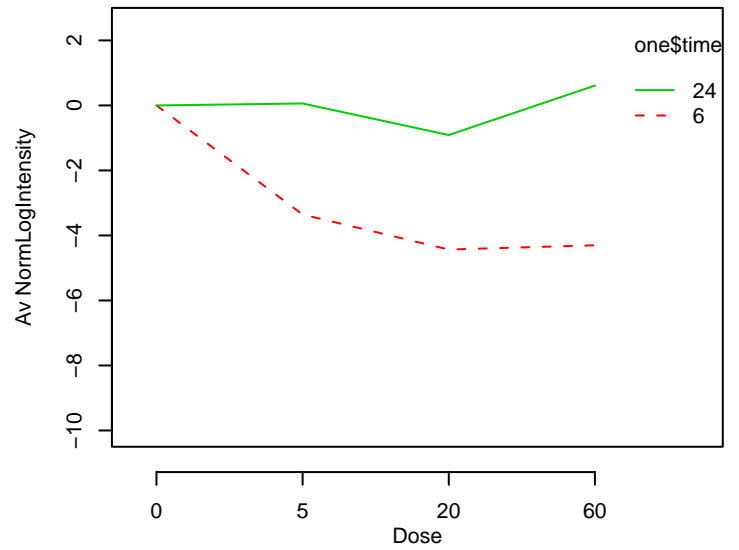

**GO\_0009267 : cellular response to starvation**

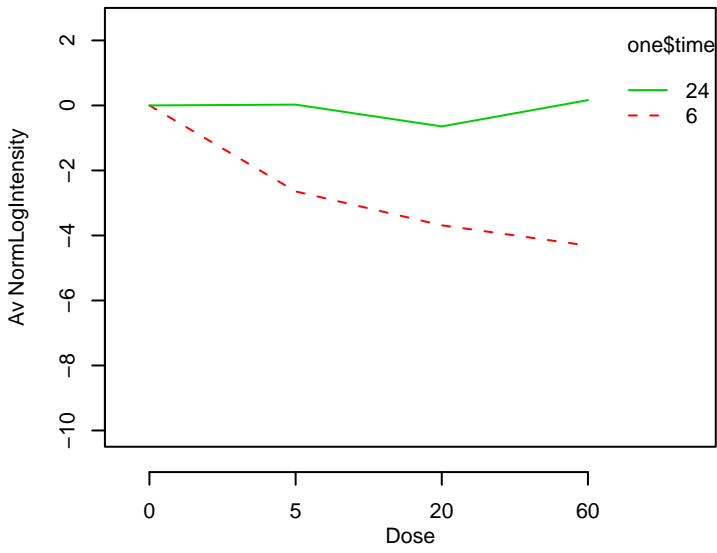

**GO\_0009268 : response to pH**

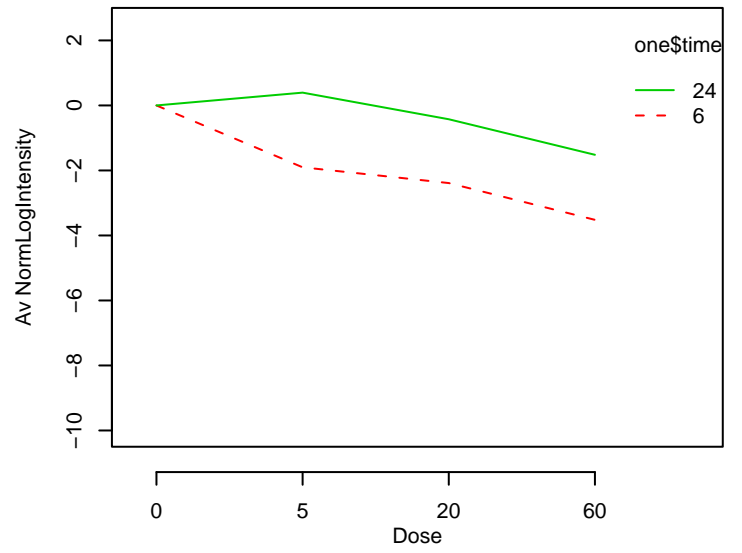

**GO\_0009296 : flagellum biogenesis**

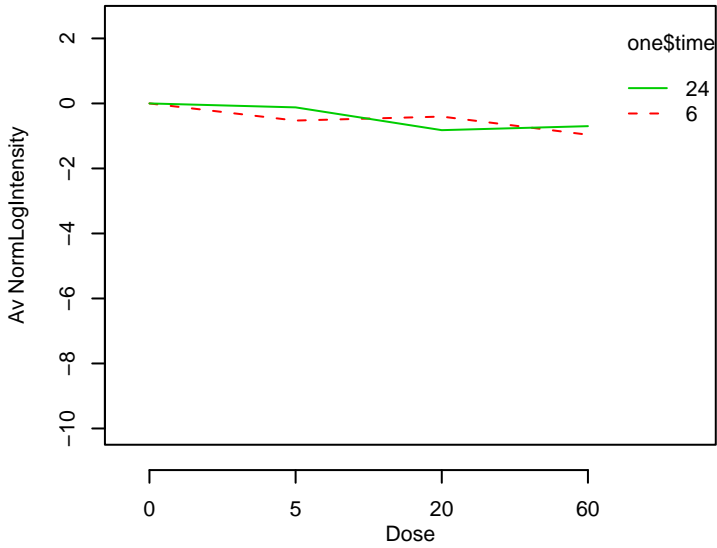

**GO\_0009303 : rRNA transcription**

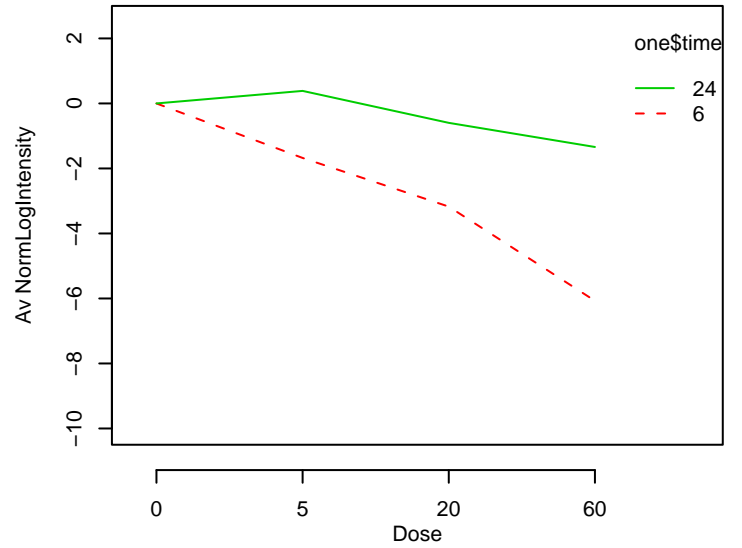

**GO\_0009306 : protein secretion**

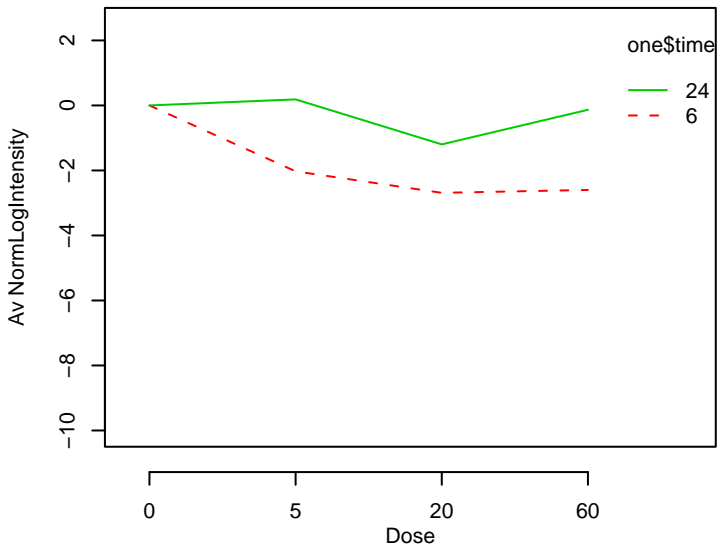

**GO\_0009309 : amine biosynthesis**

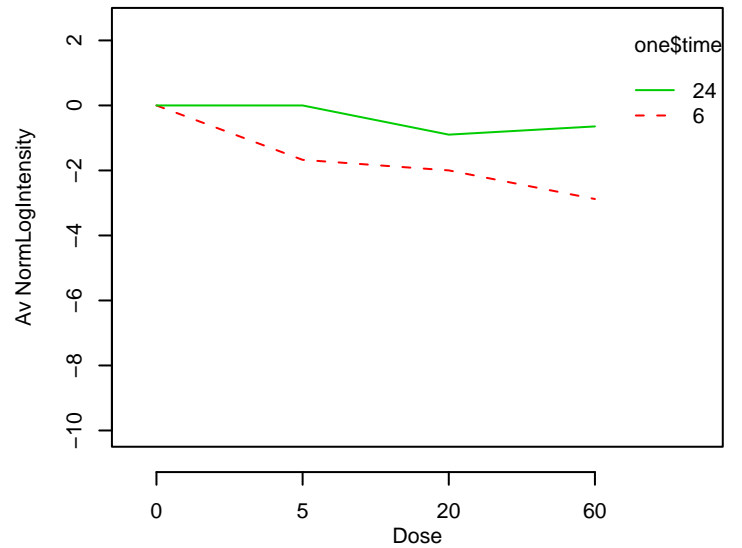



**GO\_0009310 : amine catabolism**

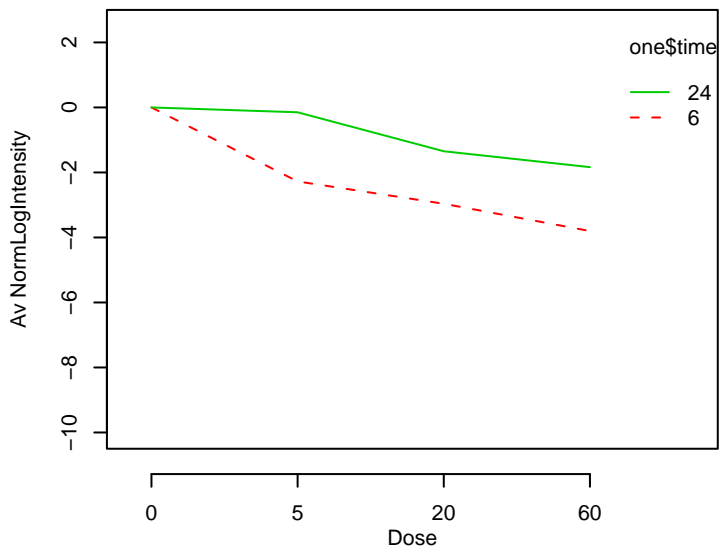

**GO\_0009311 : oligosaccharide metabolism**

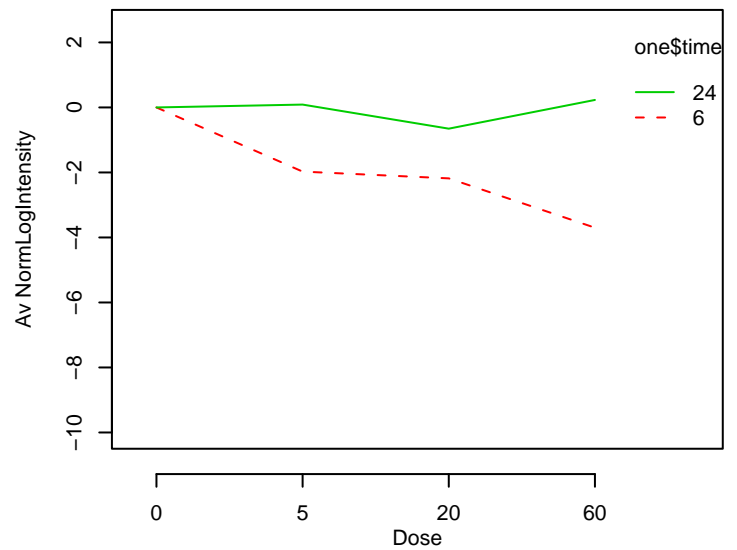

**GO\_0009312 : oligosaccharide biosynthesis**

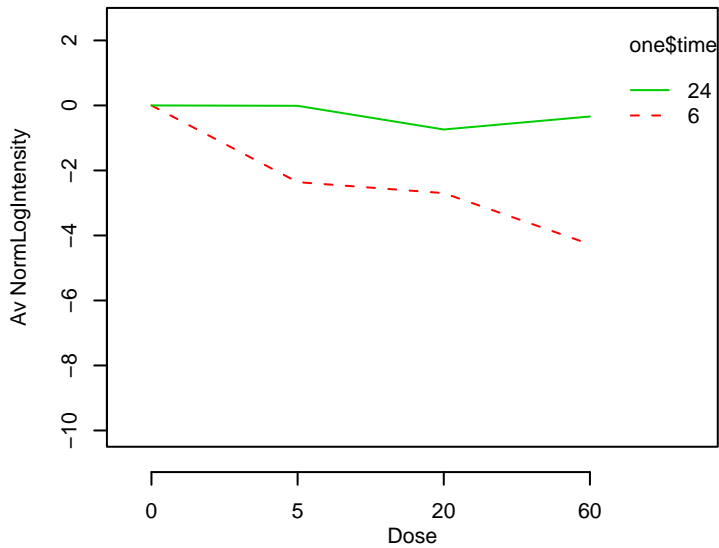

**GO\_0009314 : response to radiation**

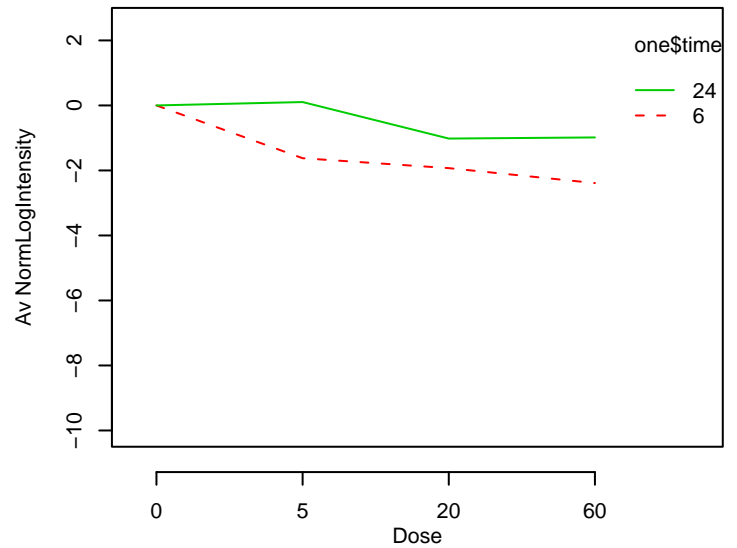

**GO\_0009395 : phospholipid catabolism**

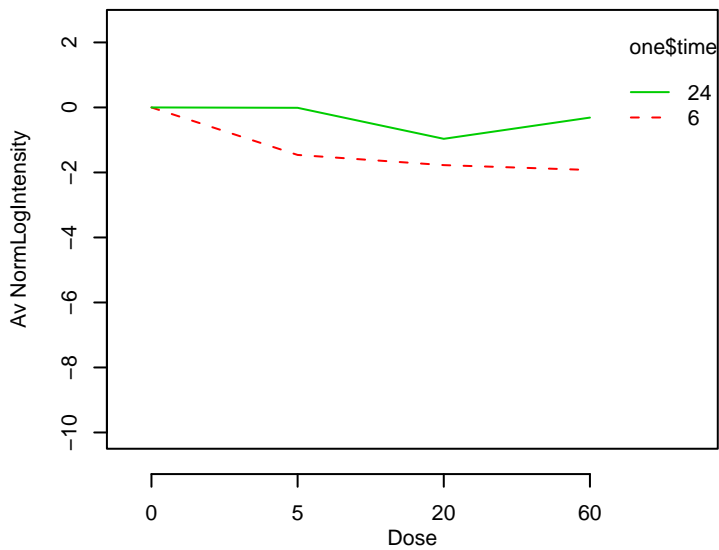

**GO\_0009396 : folic acid and derivative biosynthesis**

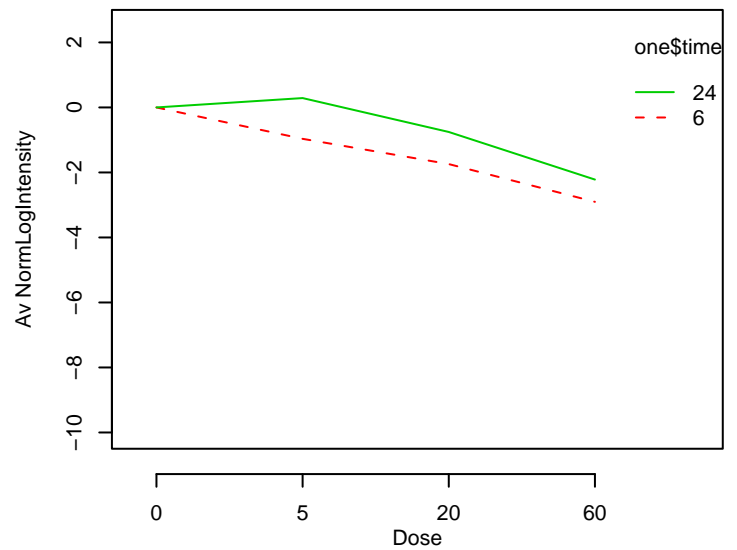

**GO\_0009405 : pathogenesis**

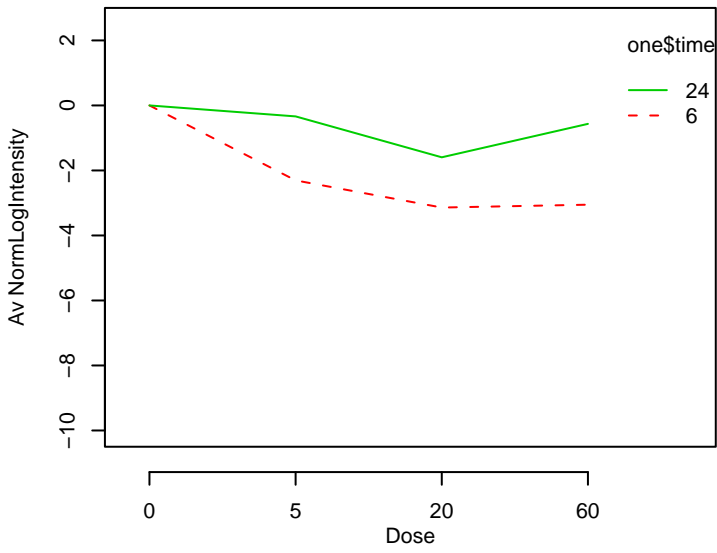

**GO\_0009408 : response to heat**

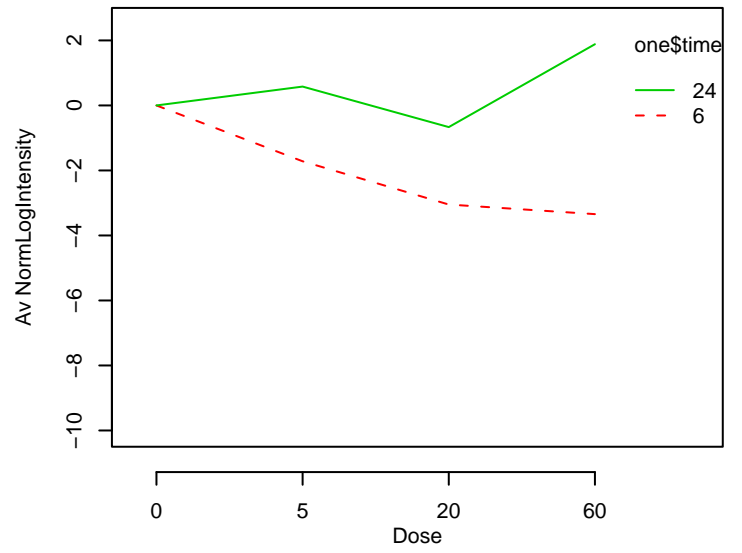

**GO\_0009409 : response to cold**

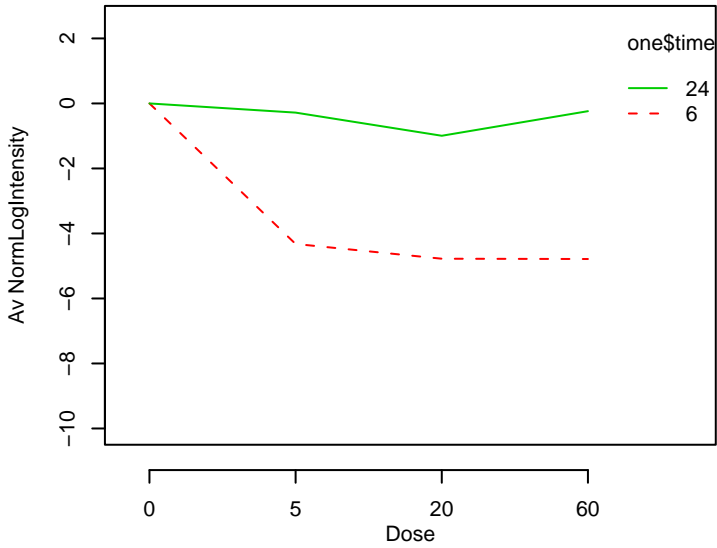

**GO\_0009410 : response to xenobiotic stimulus**

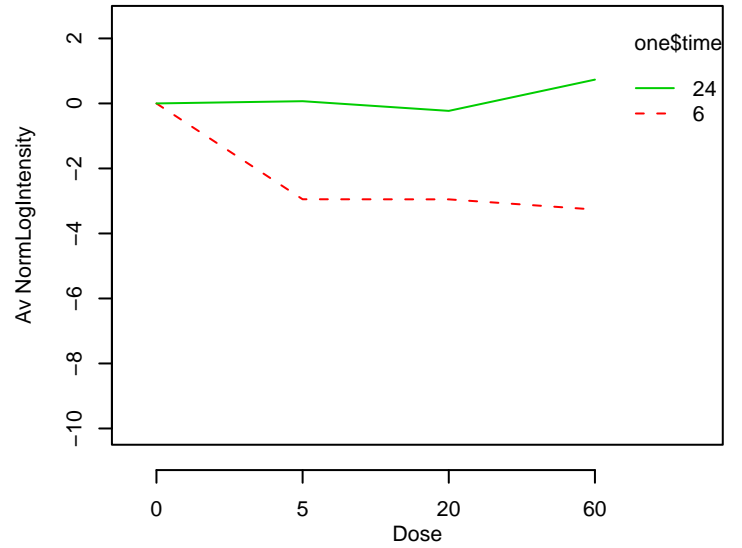

**GO\_0009411 : response to UV**

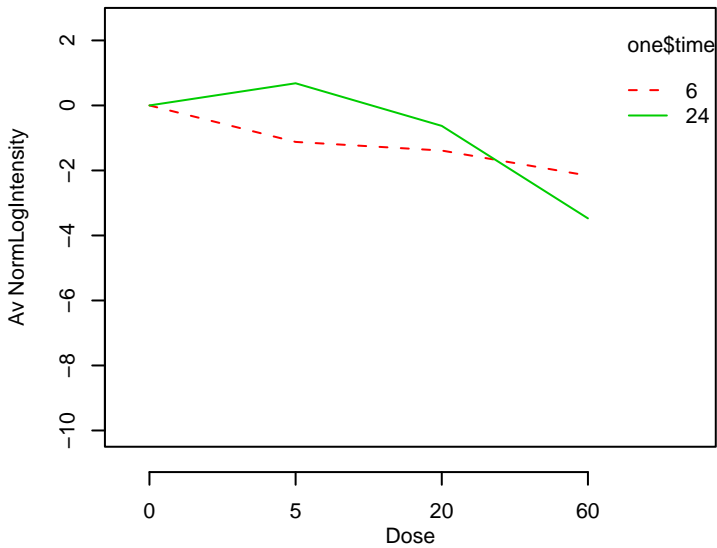

**GO\_0009416 : response to light stimulus**

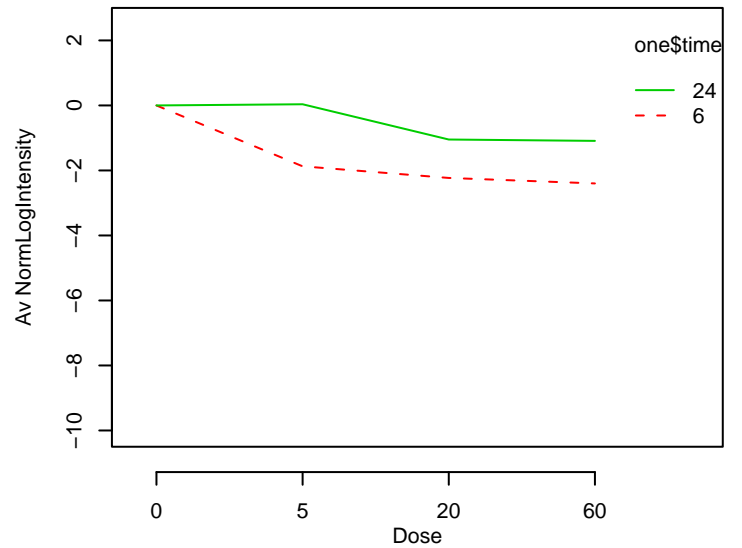

**GO\_0009435 : NAD biosynthesis**

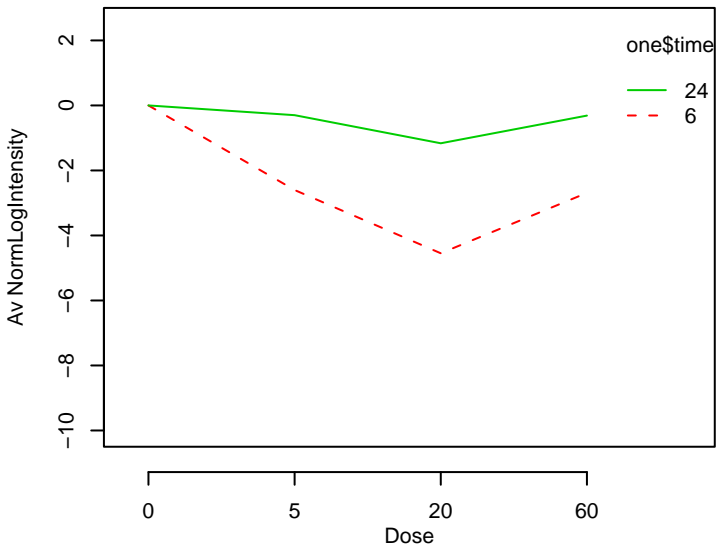

**GO\_0009451 : RNA modification**

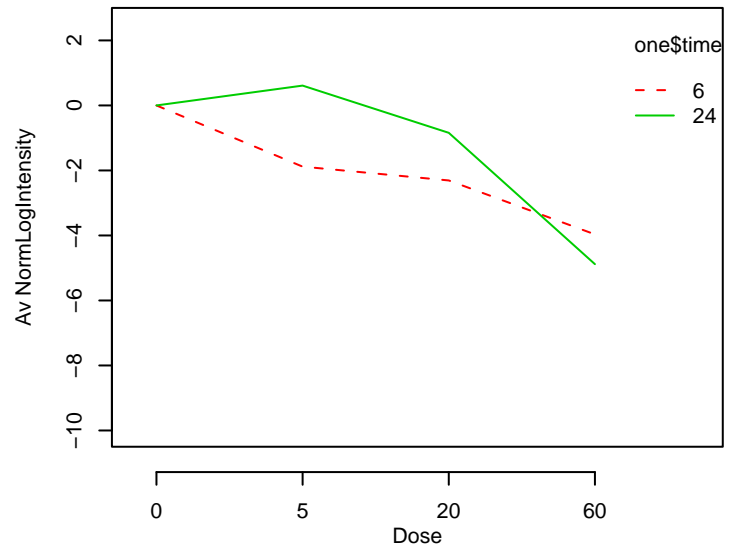

**GO\_0009566 : fertilization**

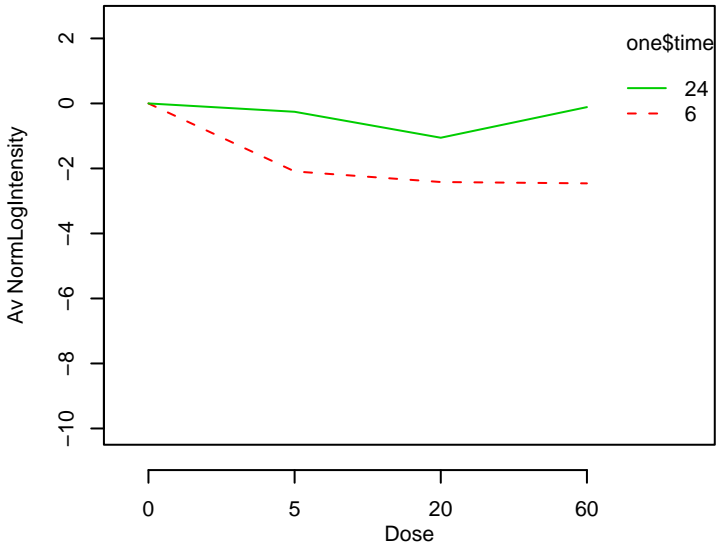

**GO\_0009581 : detection of external stimulus**

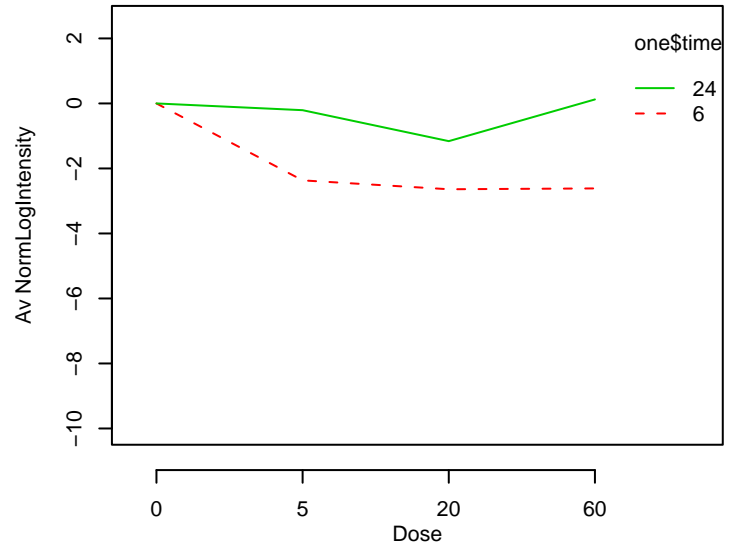

**GO\_0009582 : detection of abiotic stimulus**

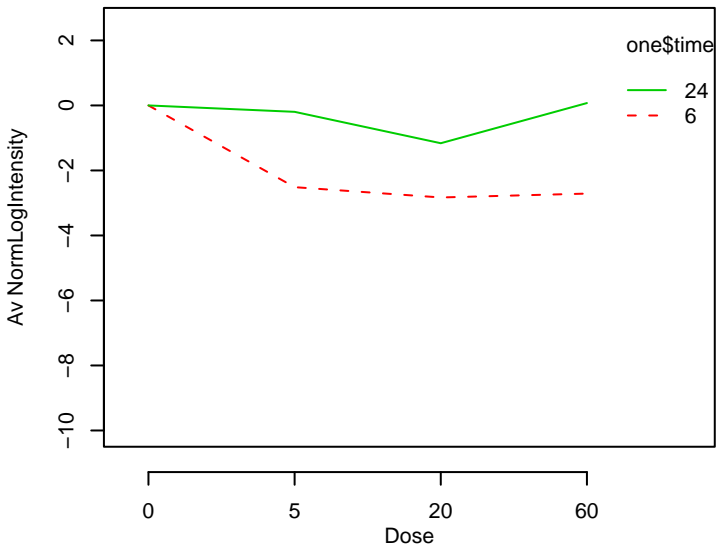

**GO\_0009583 : detection of light stimulus**

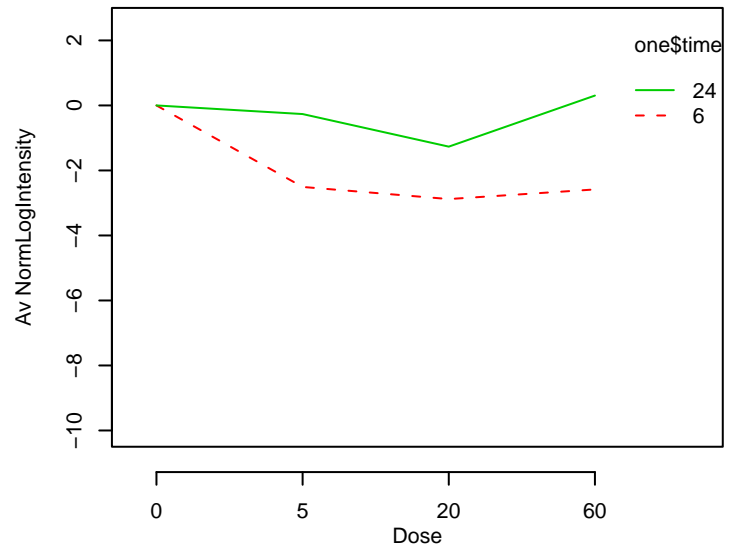

**GO\_0009584 : detection of visible light**

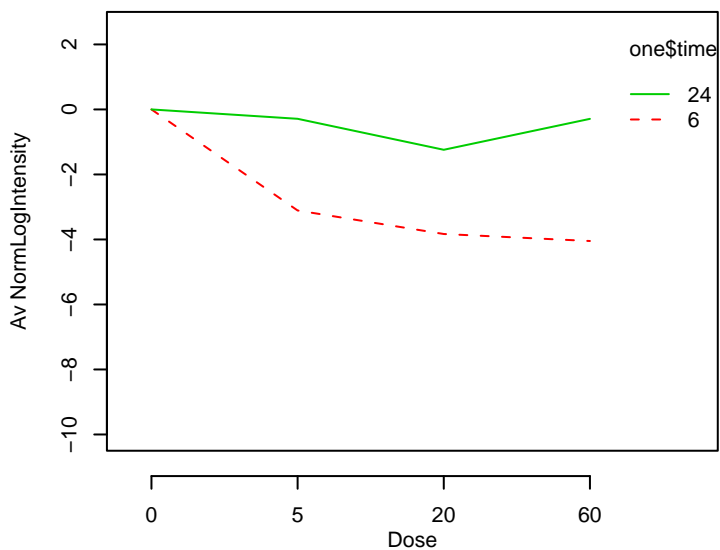

**GO\_0009593 : detection of chemical stimulus**

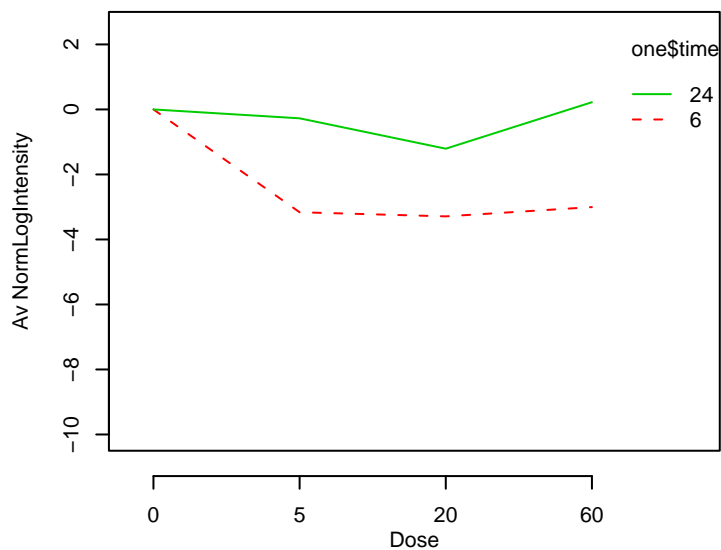

**GO\_0009595 : detection of biotic stimulus**

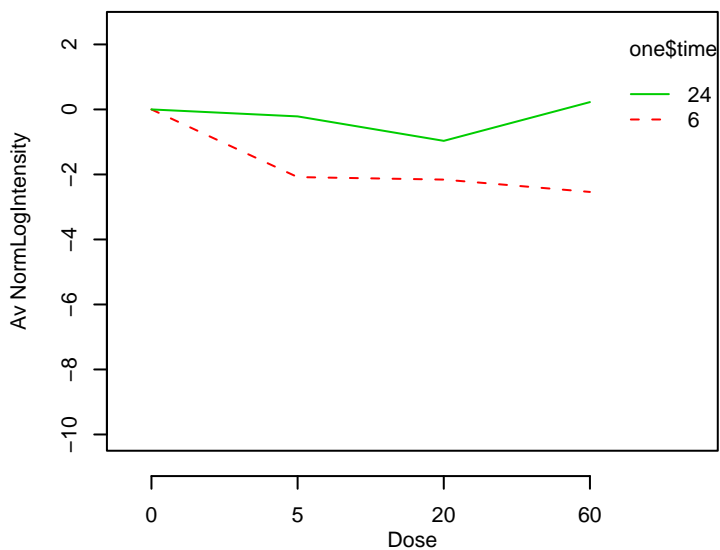

**GO\_0009612 : response to mechanical stimulus**

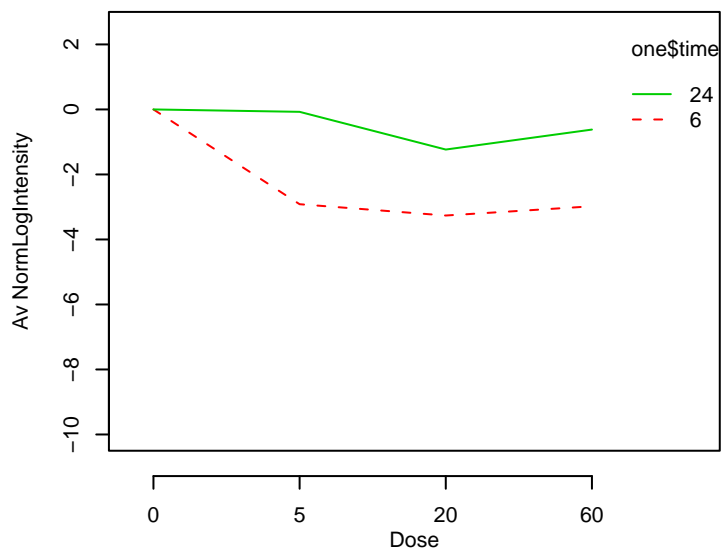

**GO\_0009615 : response to virus**

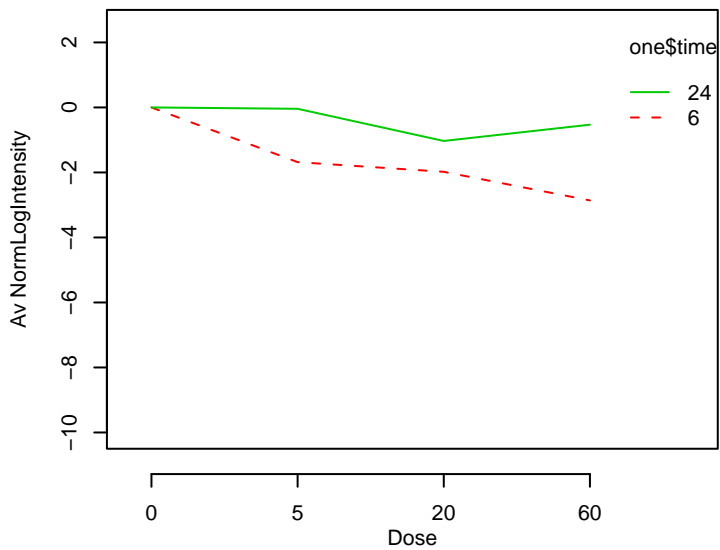

**GO\_0009617 : response to bacterium**

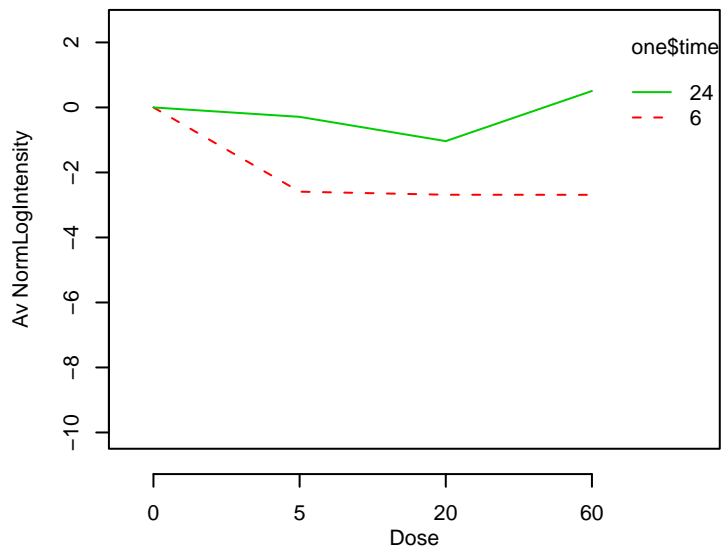

**GO\_0009620 : response to fungus**

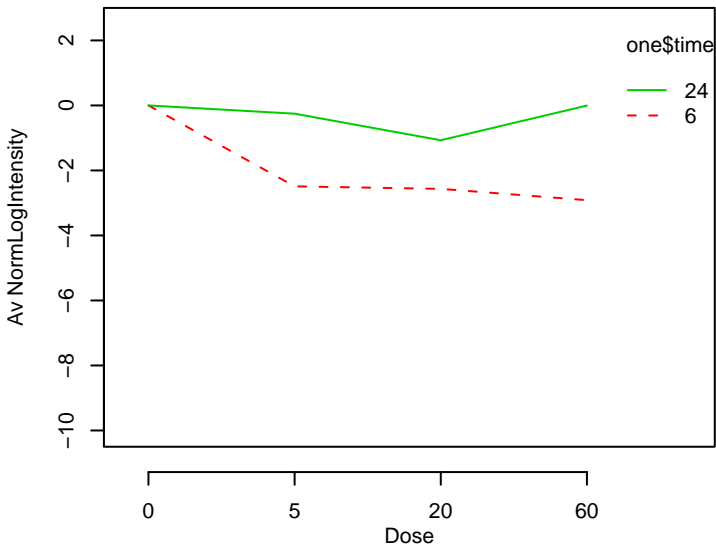

**GO\_0009636 : response to toxin**

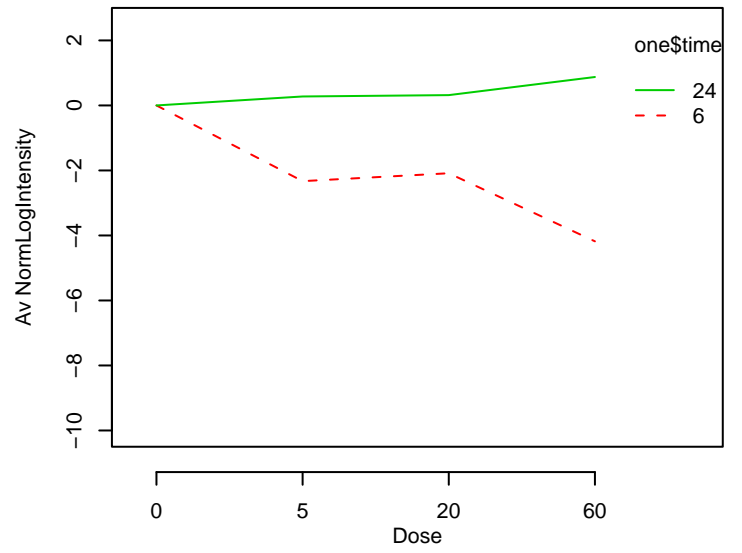

**GO\_0009725 : response to hormone stimulus**

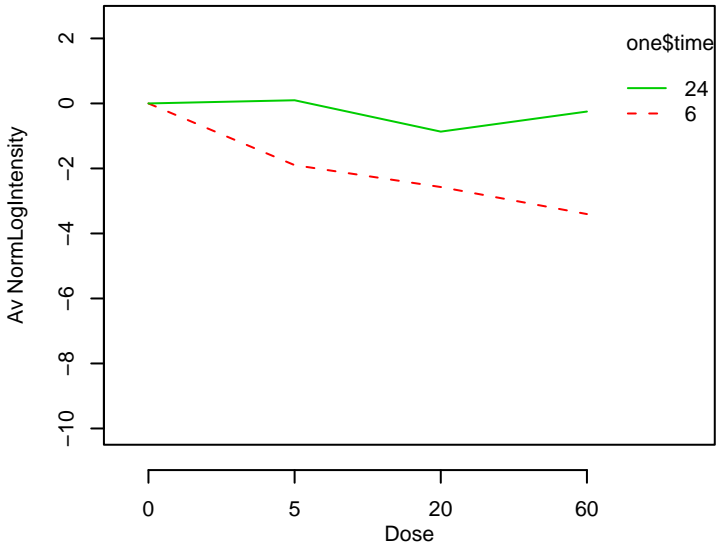

**GO\_0009743 : response to carbohydrate stimulus**

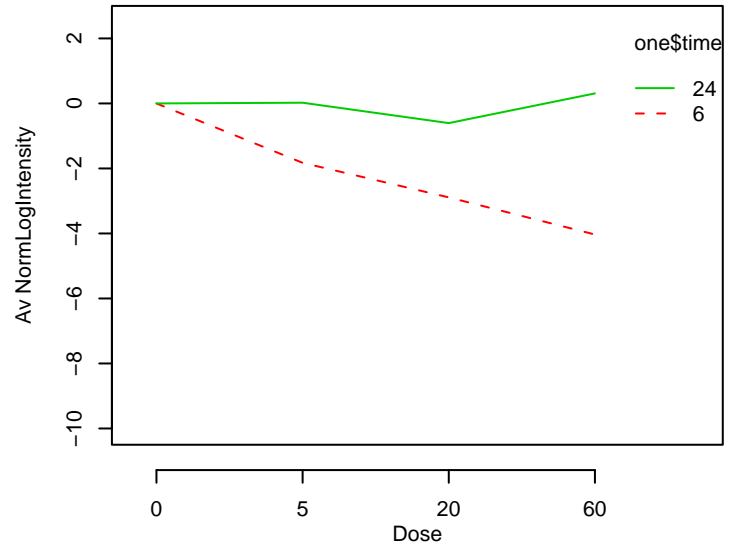

**GO\_0009746 : response to hexose stimulus**

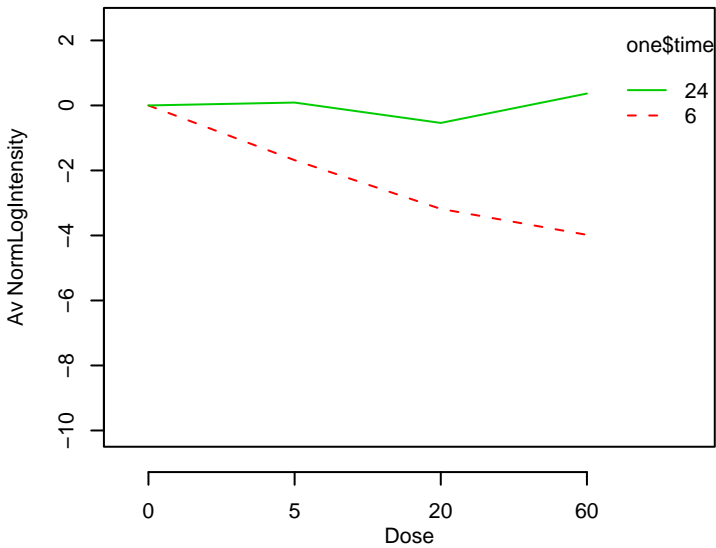

**GO\_0009749 : response to glucose stimulus**

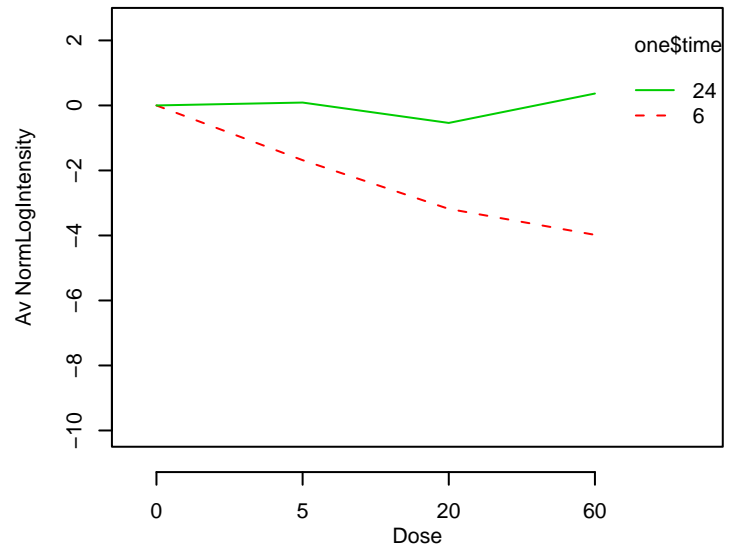

**GO\_0009755 : hormone-mediated signaling**

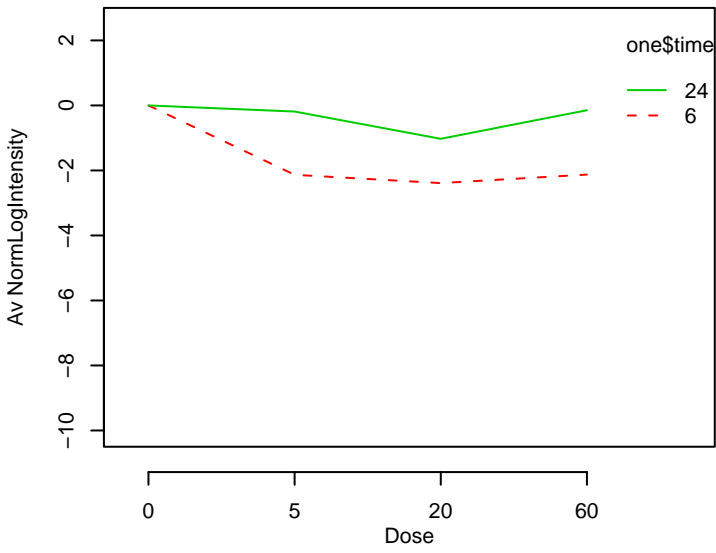

**GO\_0009791 : post-embryonic development**

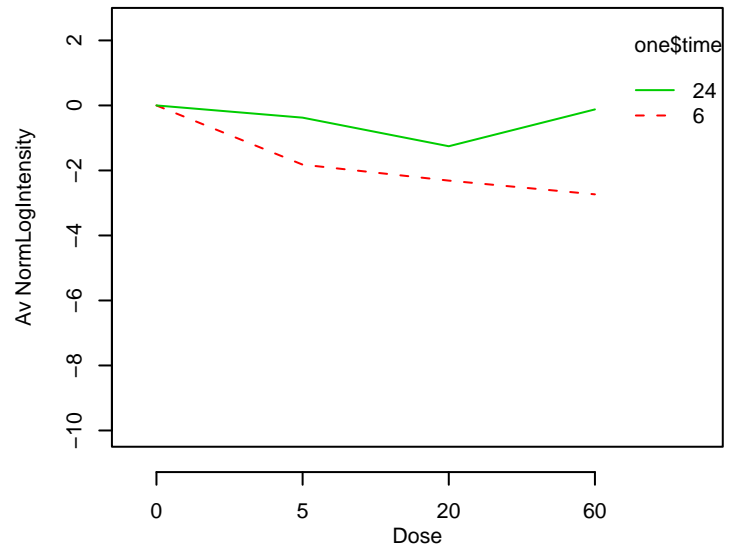

**GO\_0009792 : embryonic development (sensu Metazoa)**

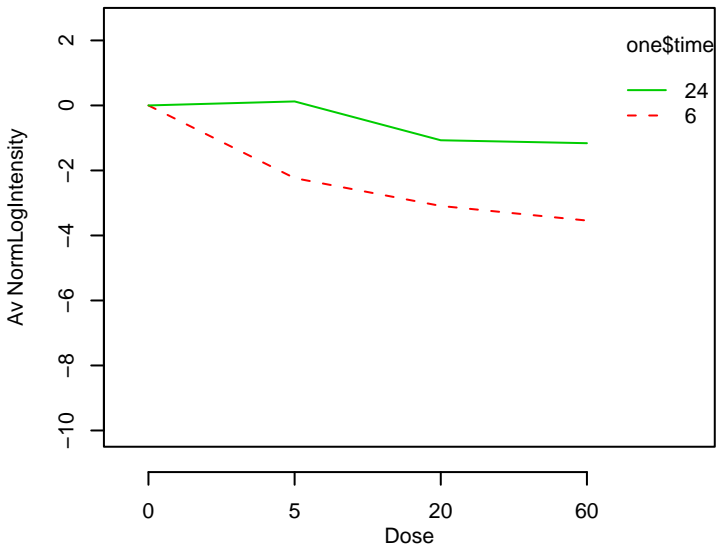

**GO\_0009798 : axis specification**

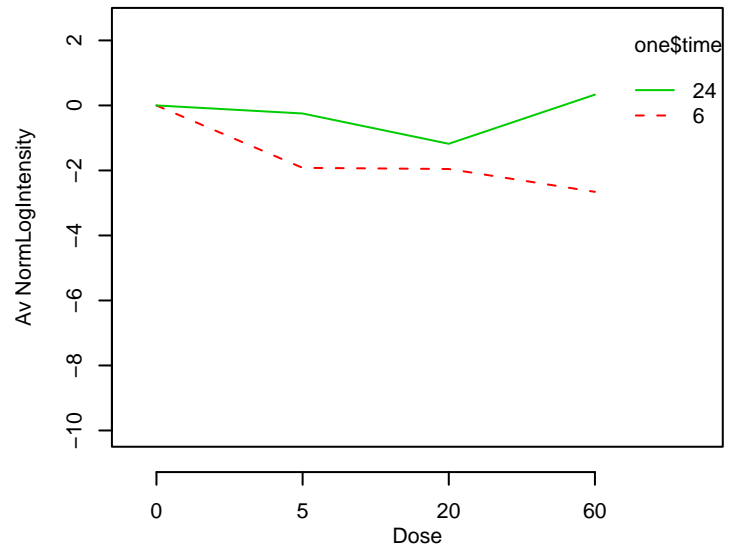

**GO\_0009799 : determination of symmetry**

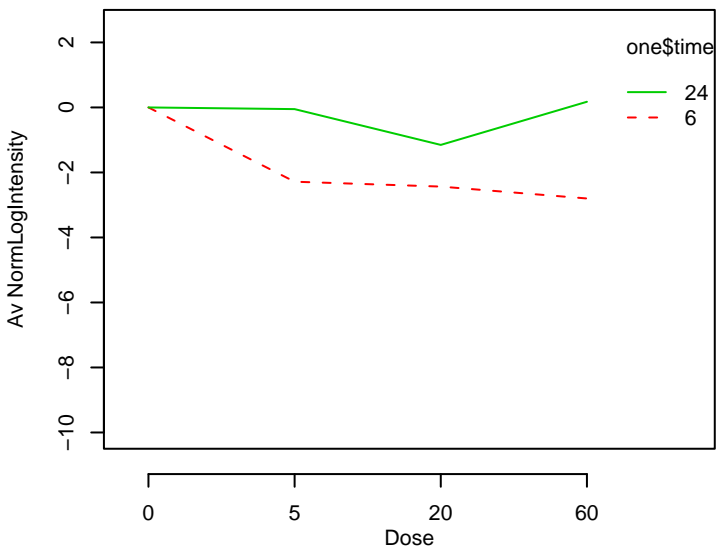

**GO\_0009855 : determination of bilateral symmetry**

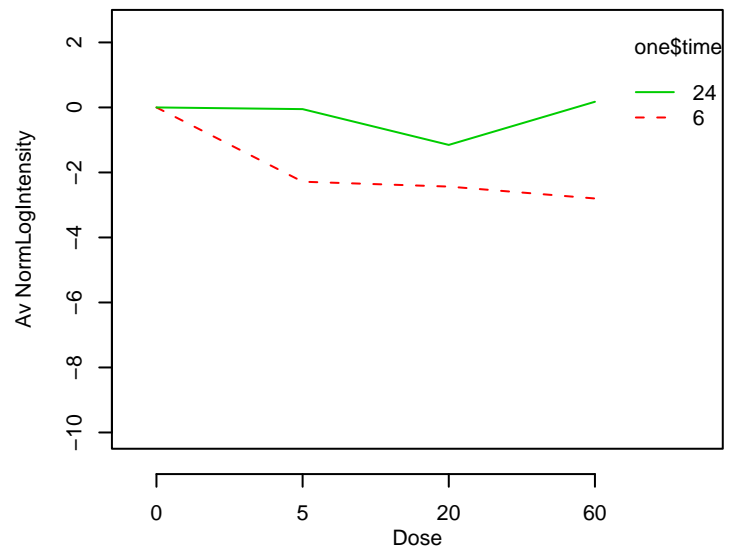

**GO\_0009880 : embryonic pattern specification**

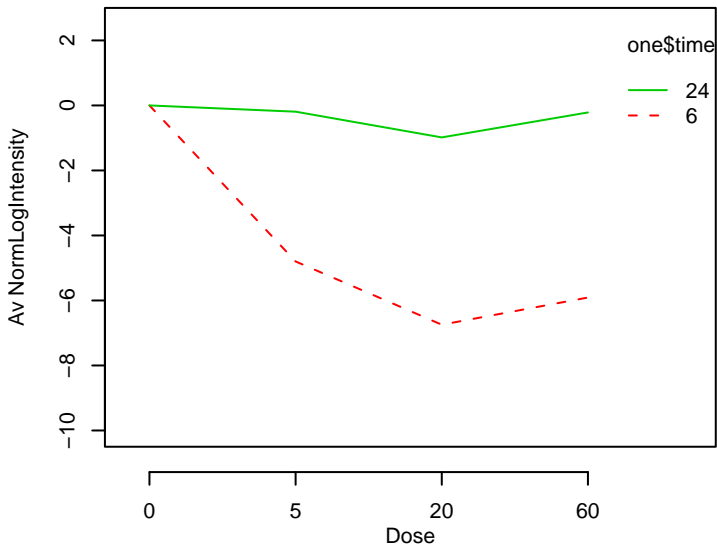

**GO\_0009889 : regulation of biosynthesis**

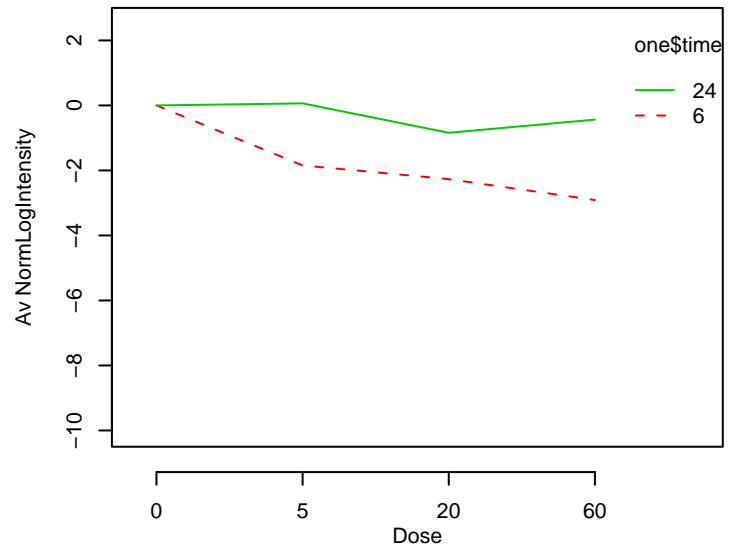

**GO\_0009890 : negative regulation of biosynthesis**

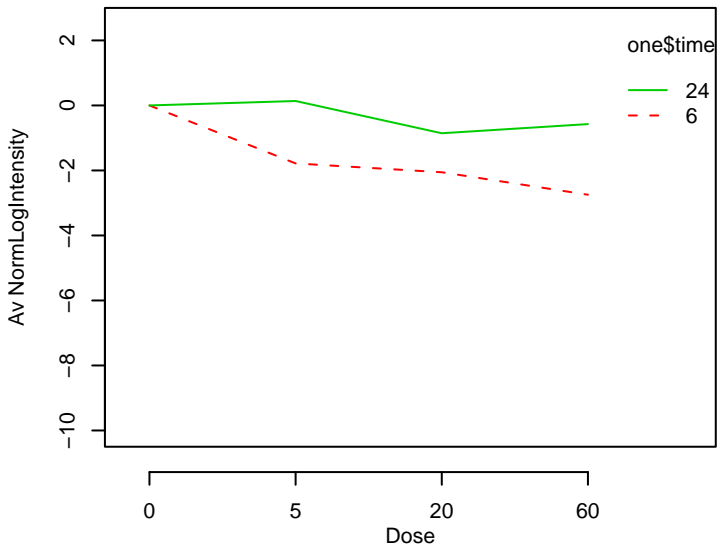

**GO\_0009891 : positive regulation of biosynthesis**

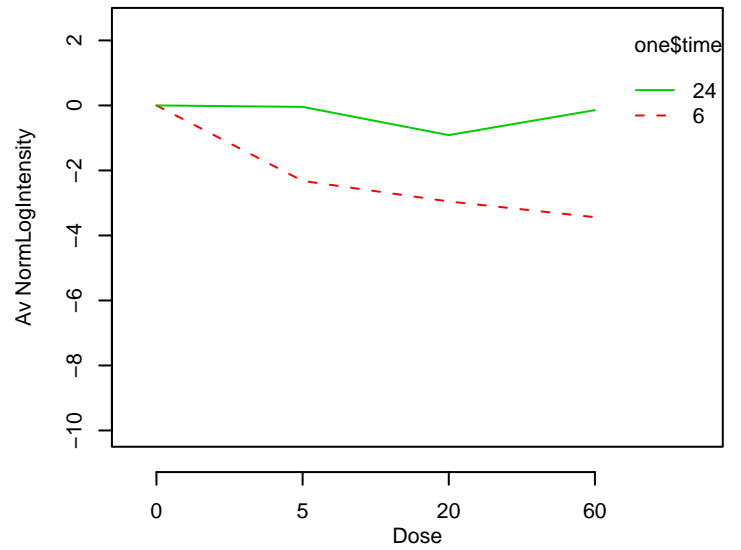

**GO\_0009894 : regulation of catabolism**

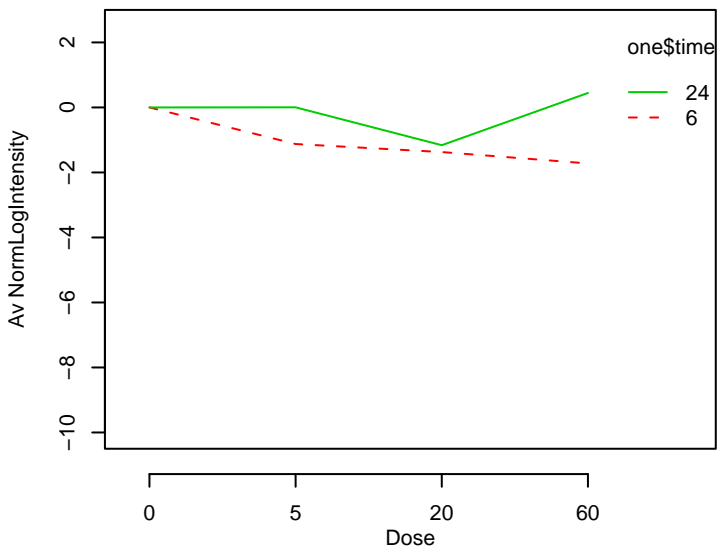

**GO\_0009895 : negative regulation of catabolism**

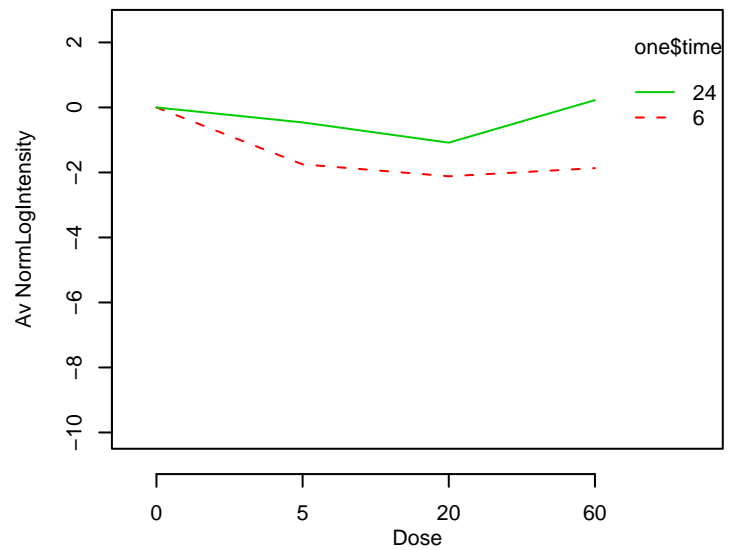

**GO\_0009912 : auditory receptor cell fate commitment**

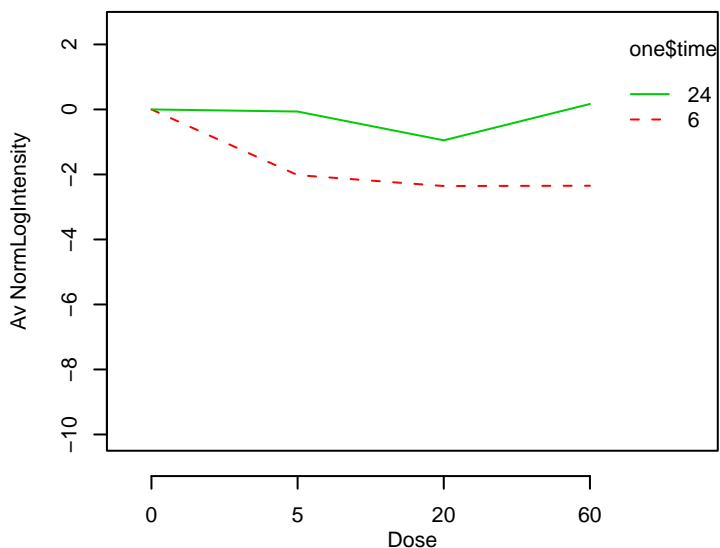

**GO\_0009913 : epidermal cell differentiation**

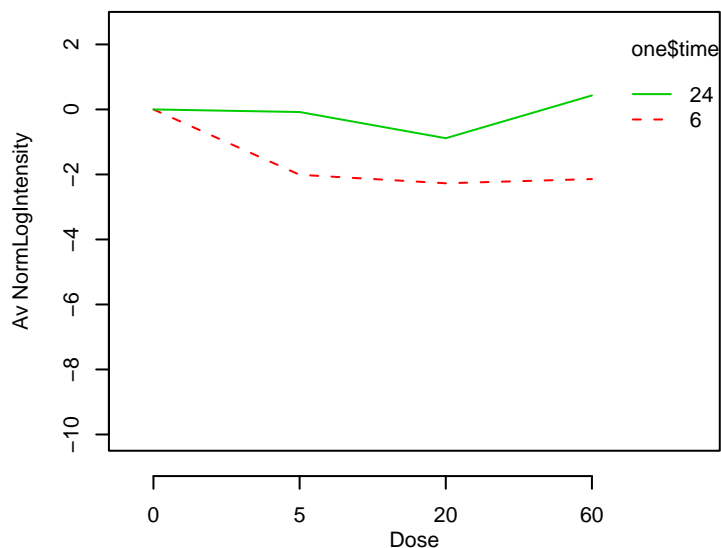

**GO\_0009948 : anterior/posterior axis specification**

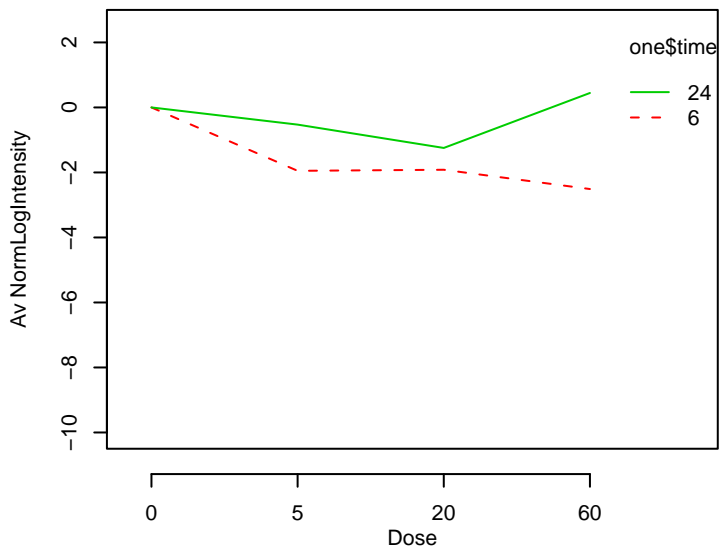

**GO\_0009952 : anterior/posterior pattern formation**

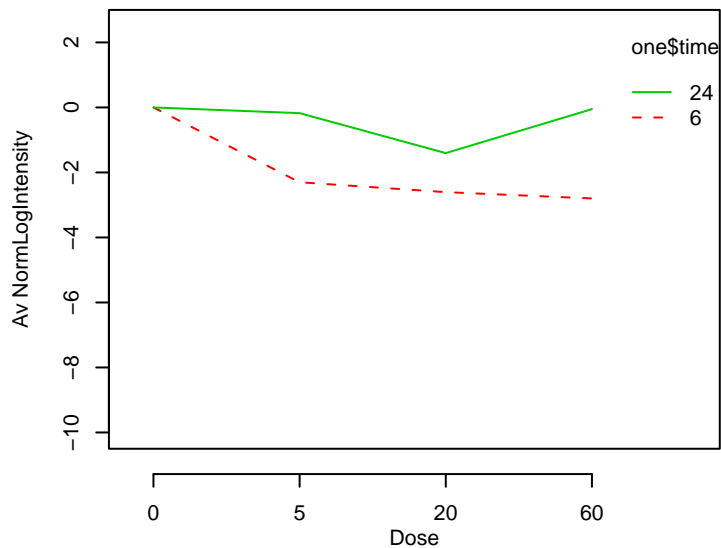

**GO\_0009953 : dorsal/ventral pattern formation**

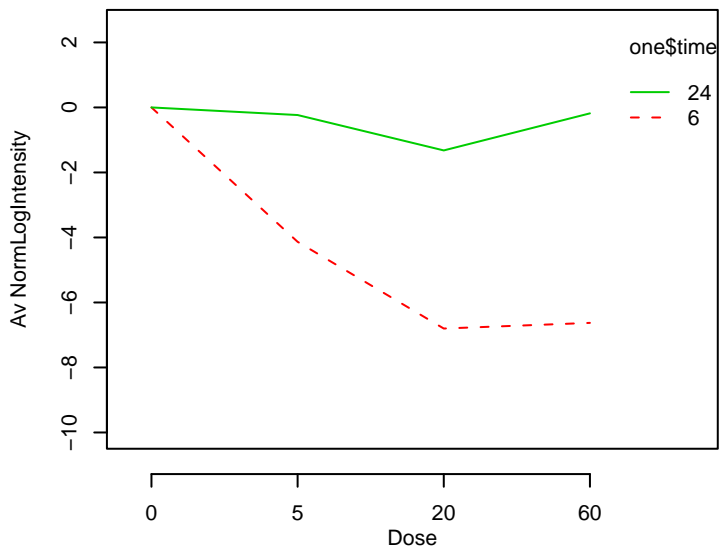

**GO\_0009954 : proximal/distal pattern formation**

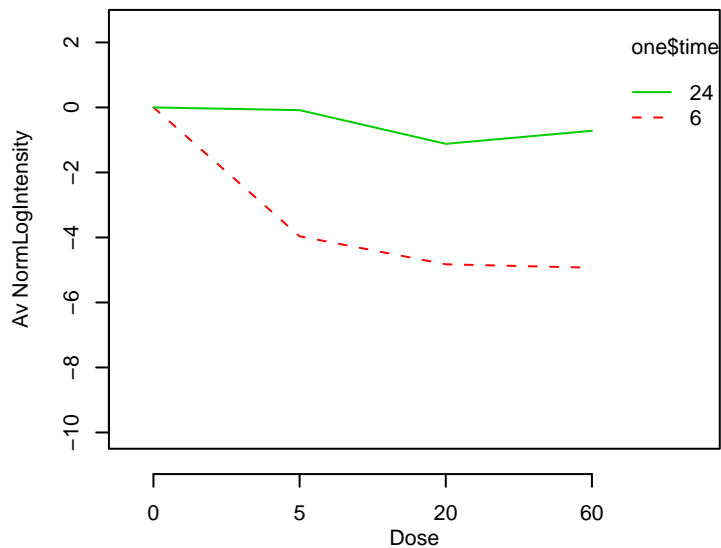



**GO\_0009967 : positive regulation of signal transduction**

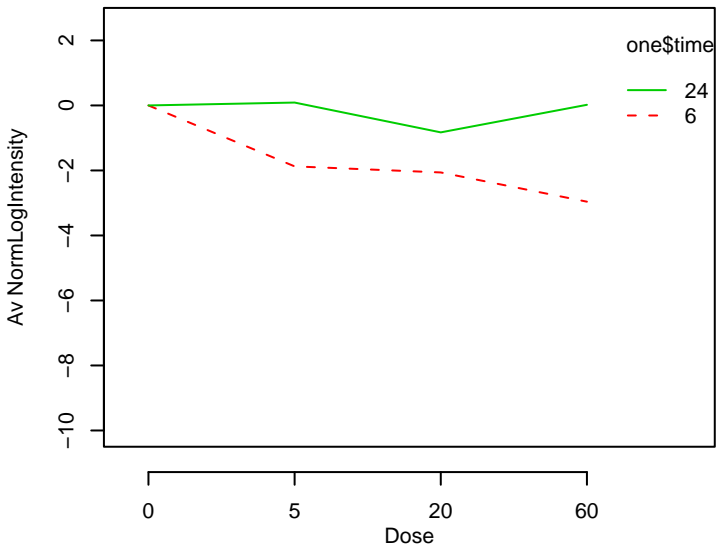

**GO\_0009968 : negative regulation of signal transduction**

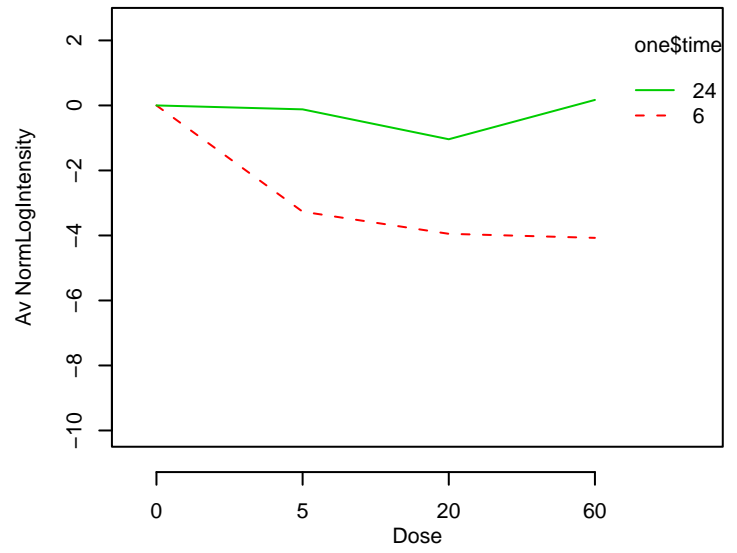

**GO\_0009991 : response to extracellular stimulus**

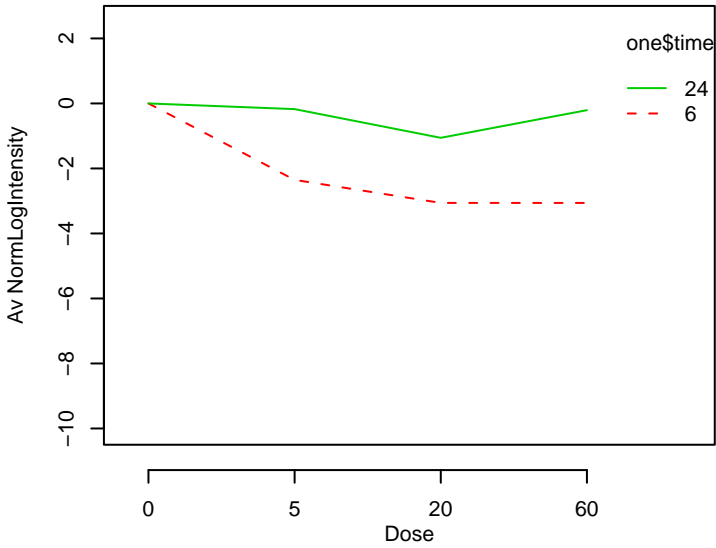

**GO\_0009994 : oocyte differentiation**

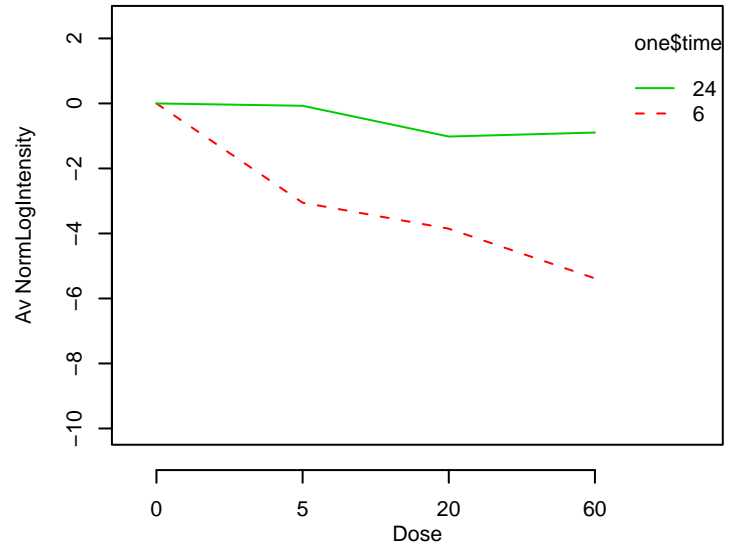

**GO\_0010001 : glial cell differentiation**

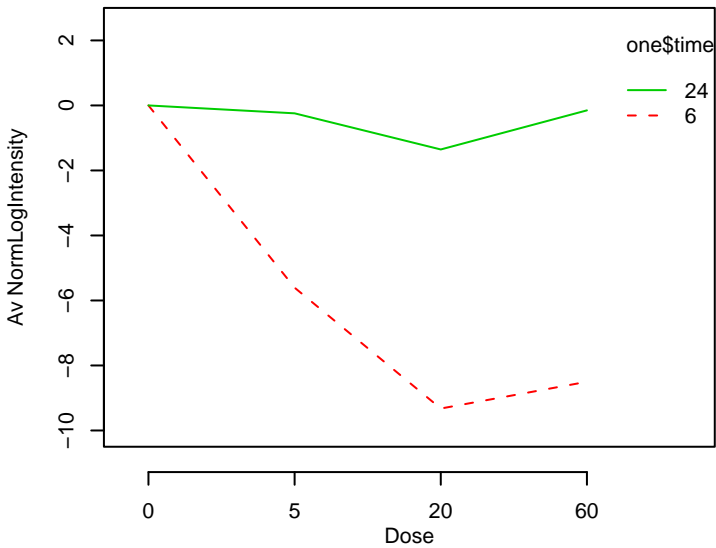

**GO\_0010003 : gastrulation (sensu Mammalia)**

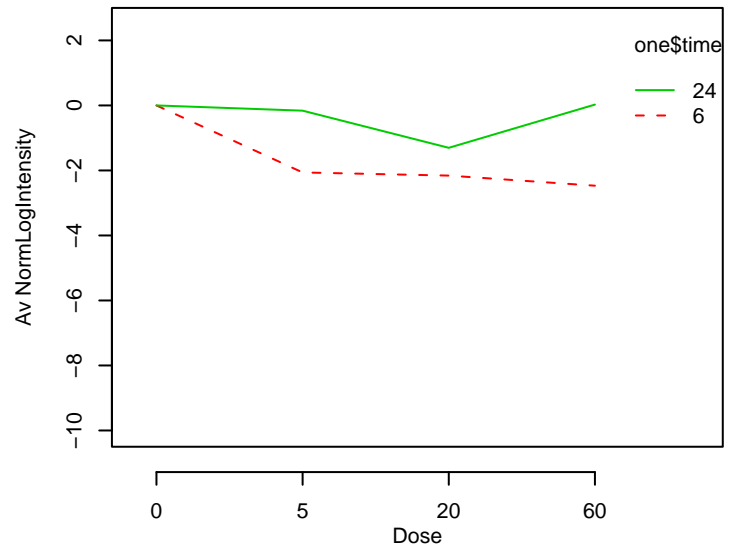

**GO\_0010033 : response to organic substance**

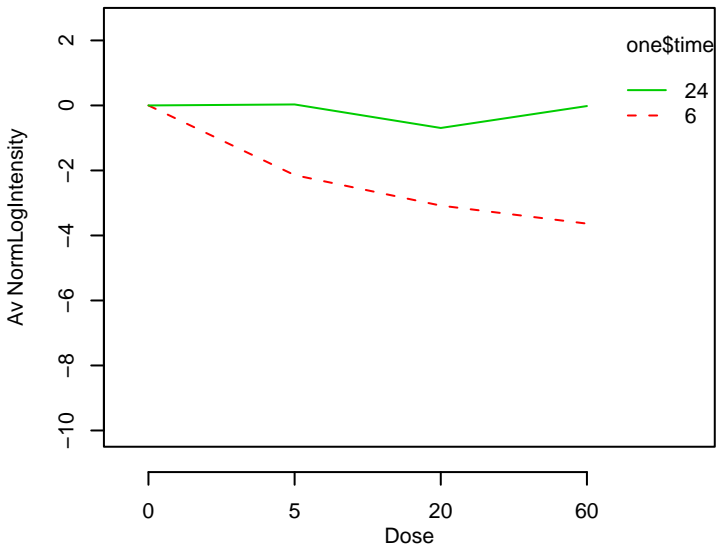

**GO\_0010035 : response to inorganic substance**

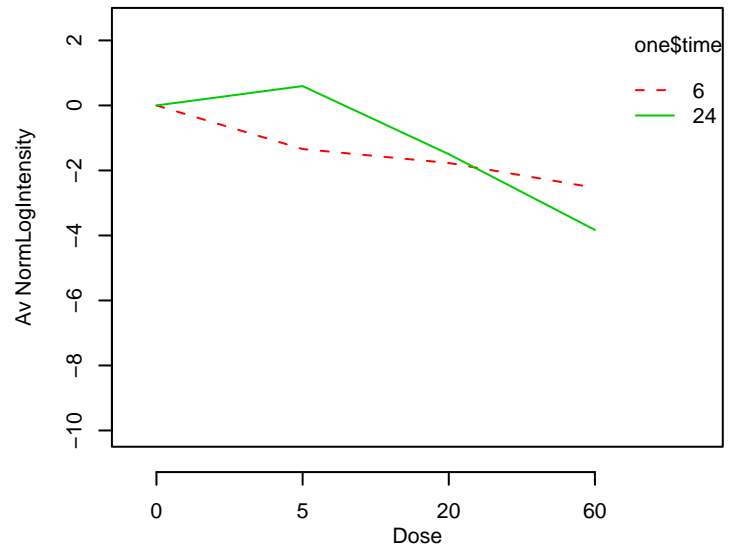

**GO\_0010038 : response to metal ion**

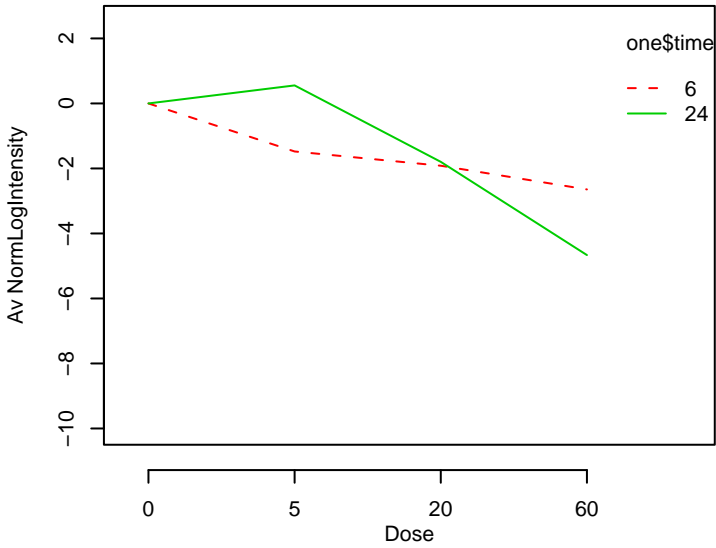

**GO\_0010092 : specification of organ identity**

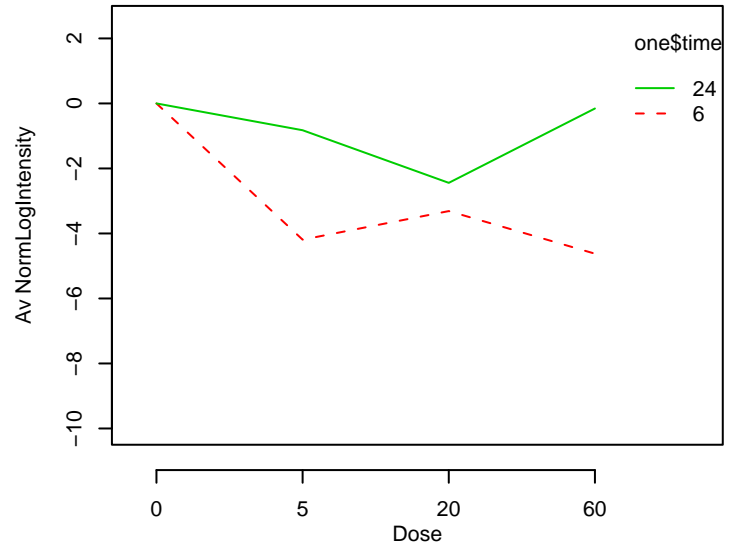

**GO\_0012502 : induction of programmed cell death**

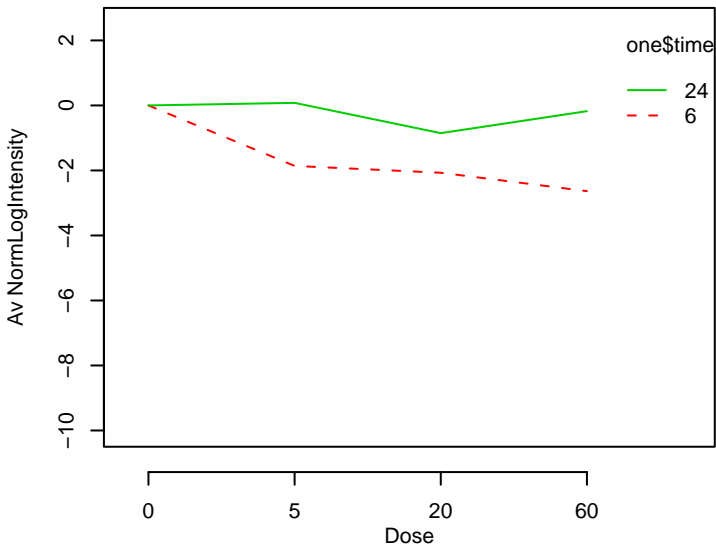

**GO\_0014003 : oligodendrocyte development**

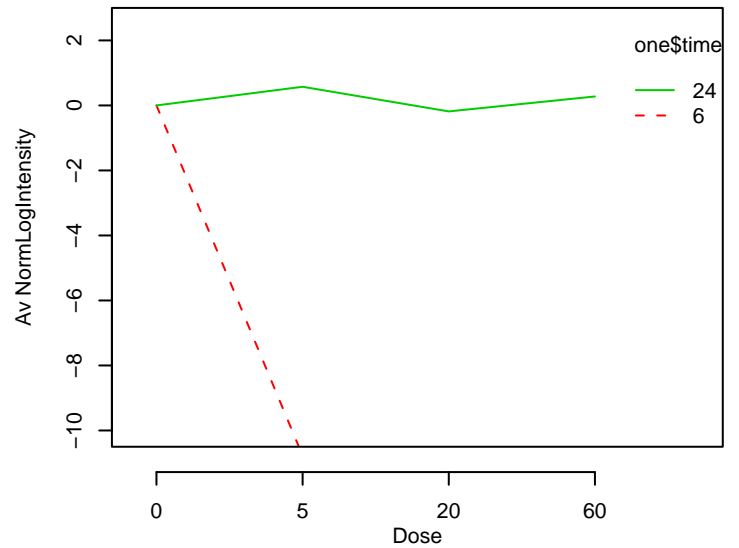

**GO\_0014020 : primary neural tube formation**

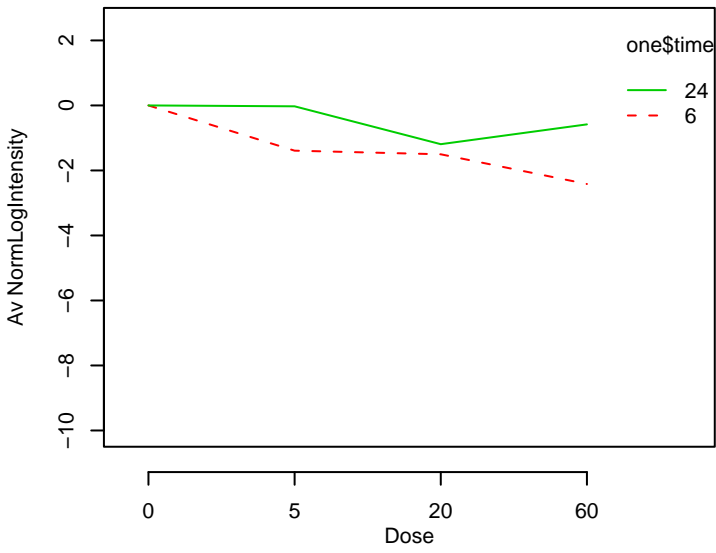

**GO\_0014031 : mesenchymal cell development**

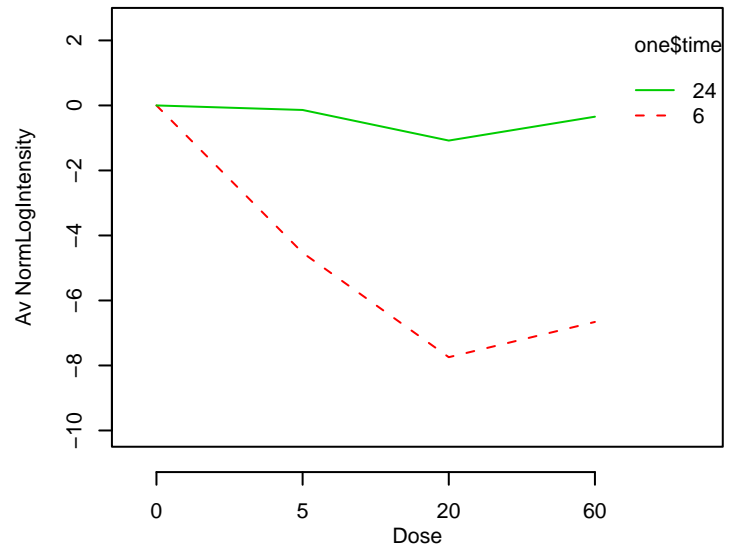

**GO\_0014032 : neural crest cell development**

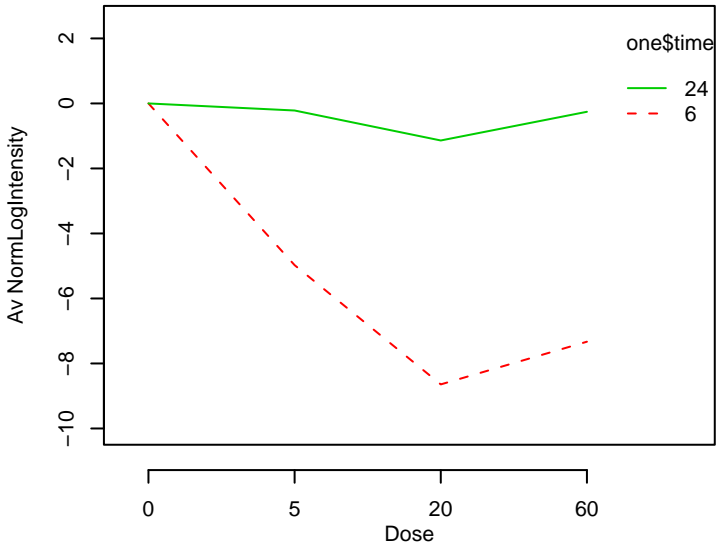

**GO\_0014033 : neural crest cell differentiation**

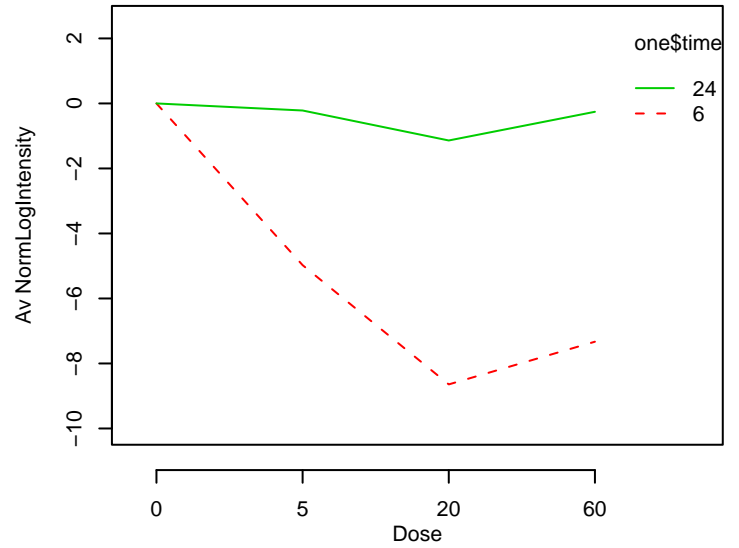

**GO\_0015012 : heparan sulfate proteoglycan biosynthesis**

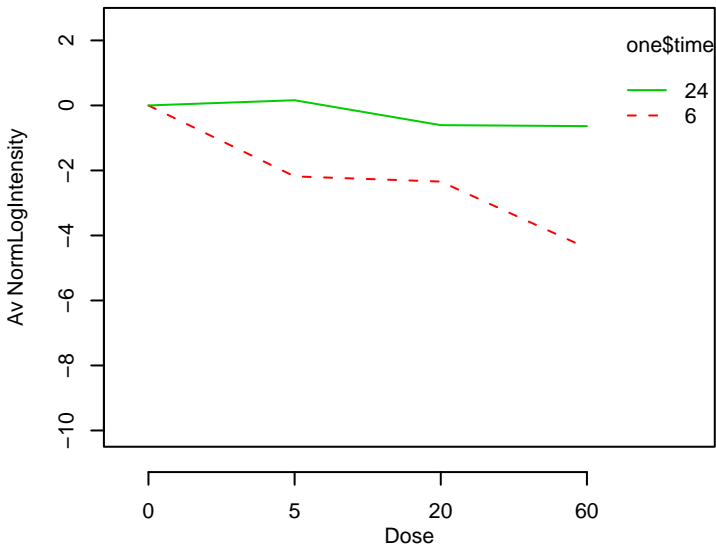

**GO\_0015669 : gas transport**

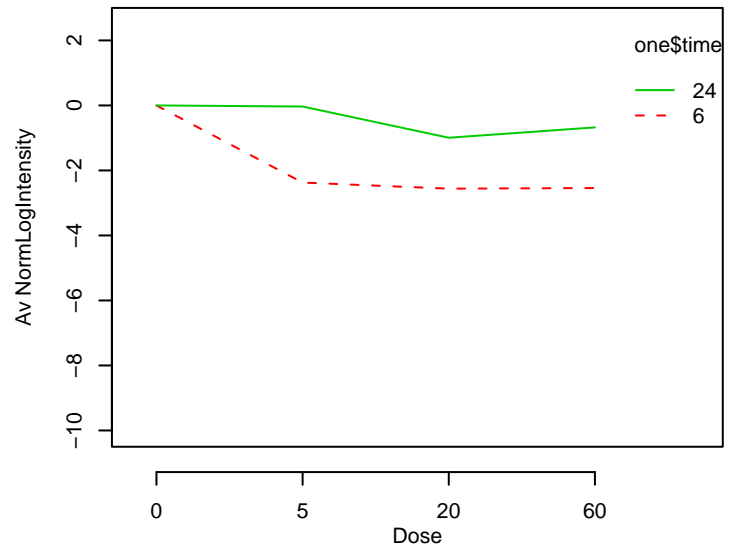

**GO\_0015671 : oxygen transport**

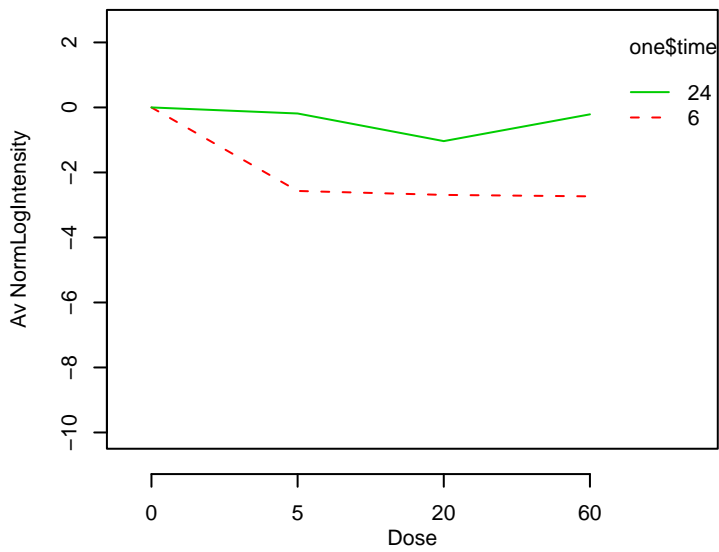

**GO\_0015674 : di-, tri-valent inorganic cation transport**

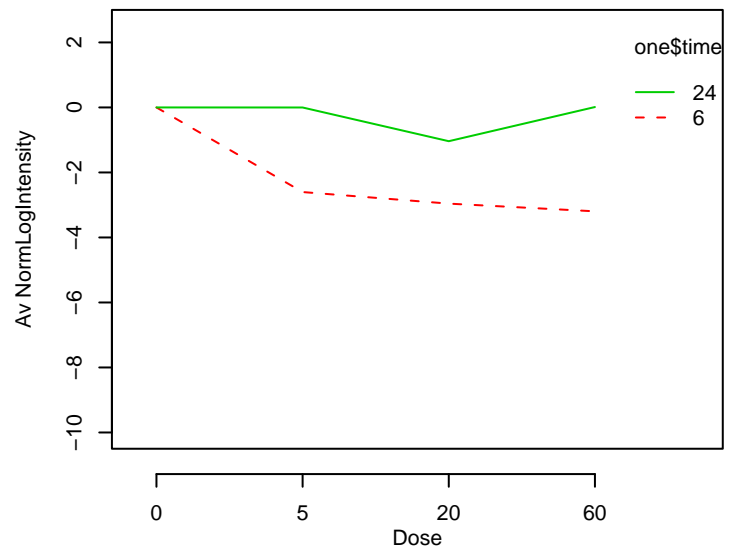

**GO\_0015695 : organic cation transport**

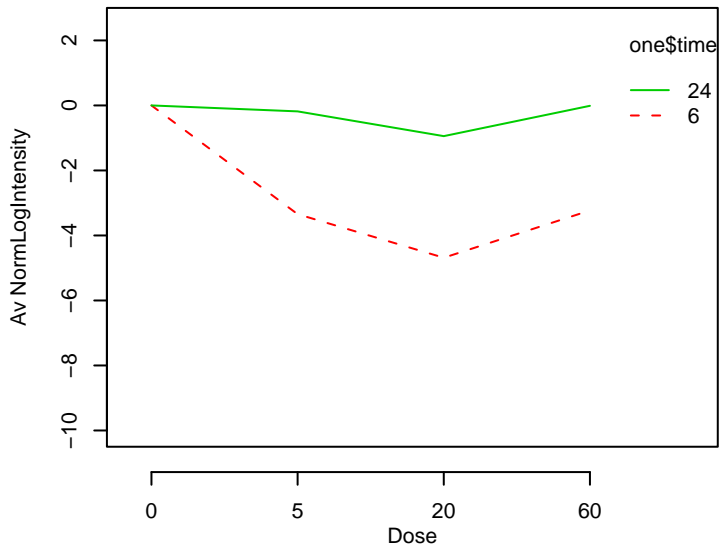

**GO\_0015698 : inorganic anion transport**

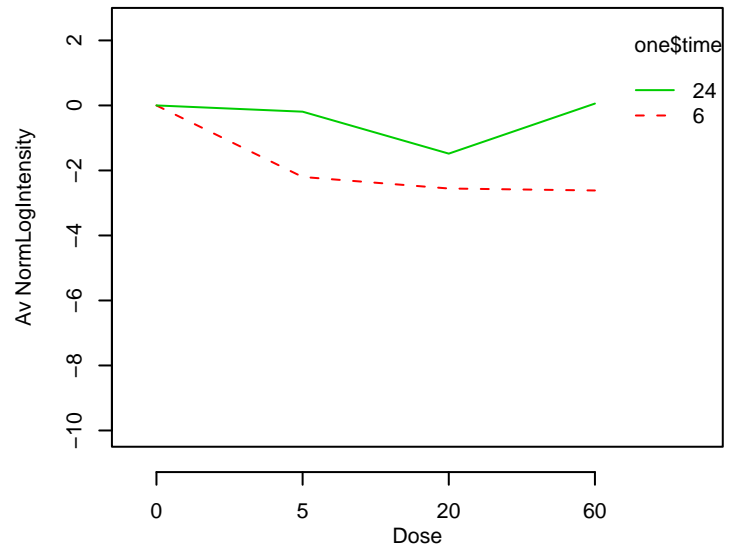

**GO\_0015711 : organic anion transport**

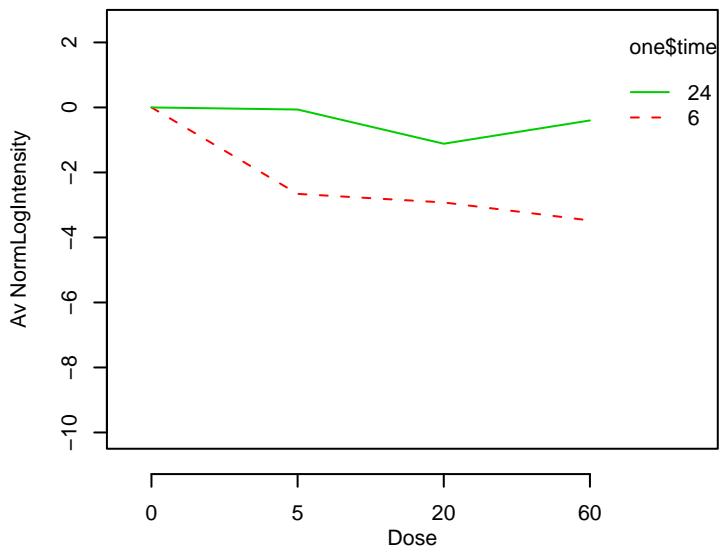

**GO\_0015718 : monocarboxylic acid transport**

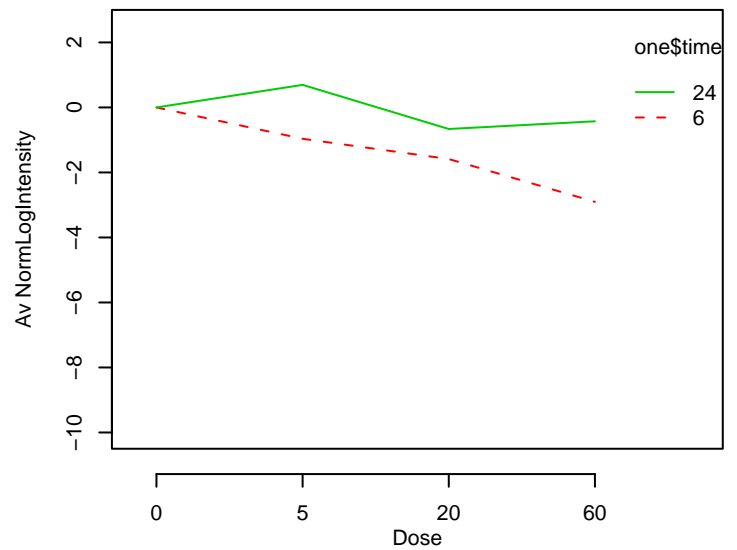

**GO\_0015749 : monosaccharide transport**

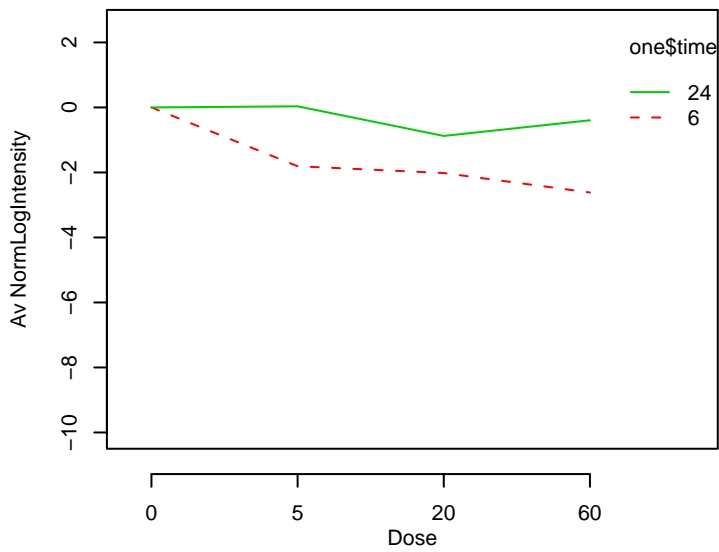

**GO\_0015758 : glucose transport**

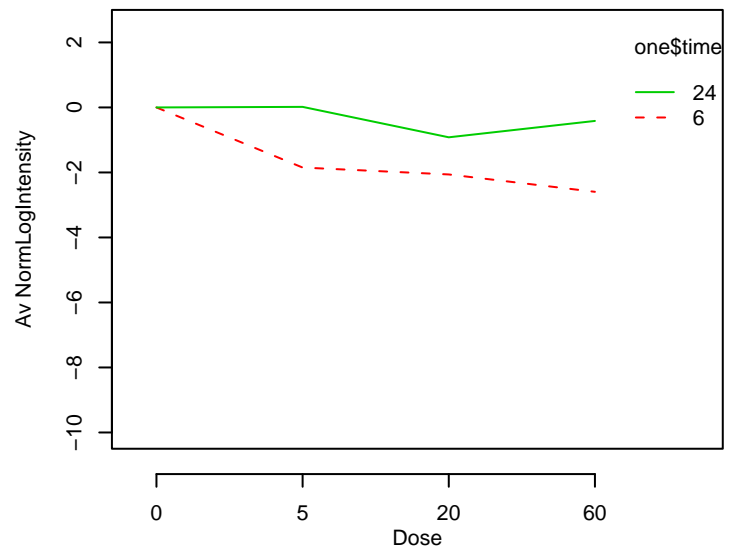

**GO\_0015780 : nucleotide-sugar transport**

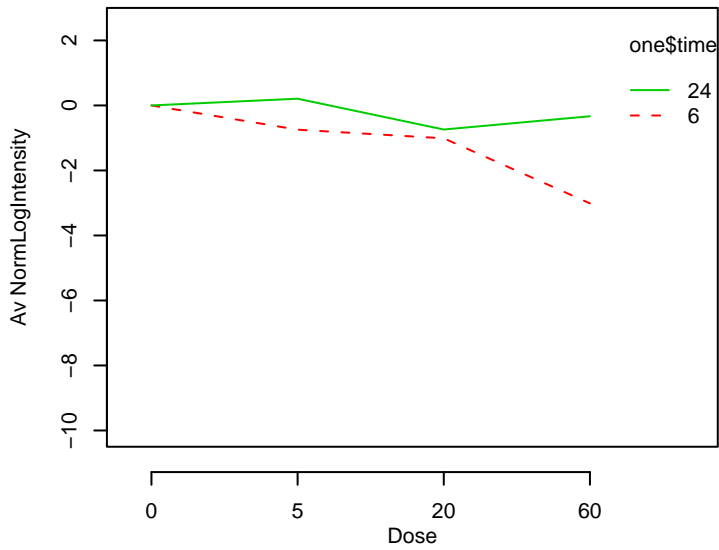

**GO\_0015781 : pyrimidine nucleotide-sugar transport**

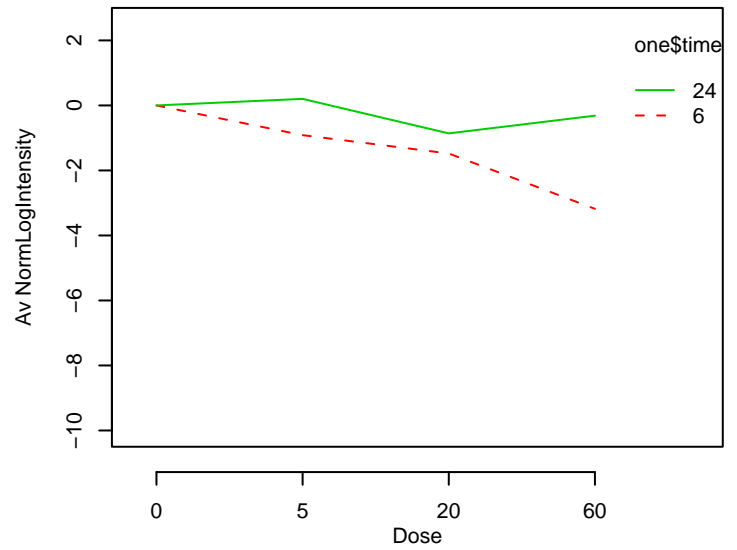

**GO\_0015800 : acidic amino acid transport**

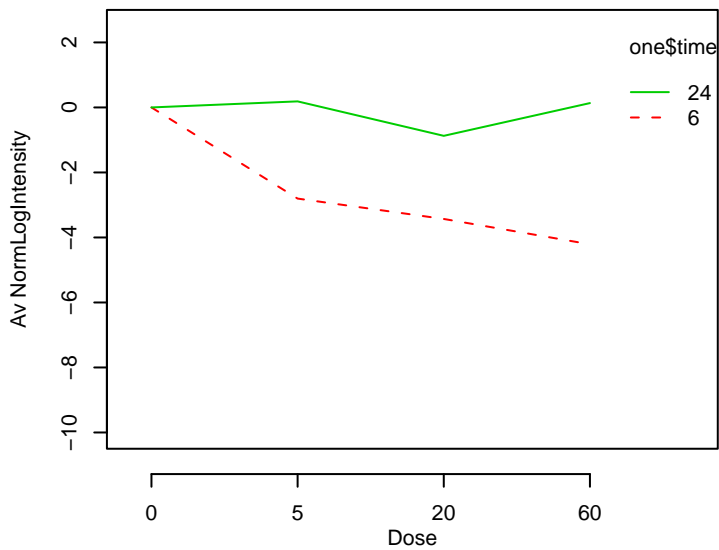

**GO\_0015802 : basic amino acid transport**

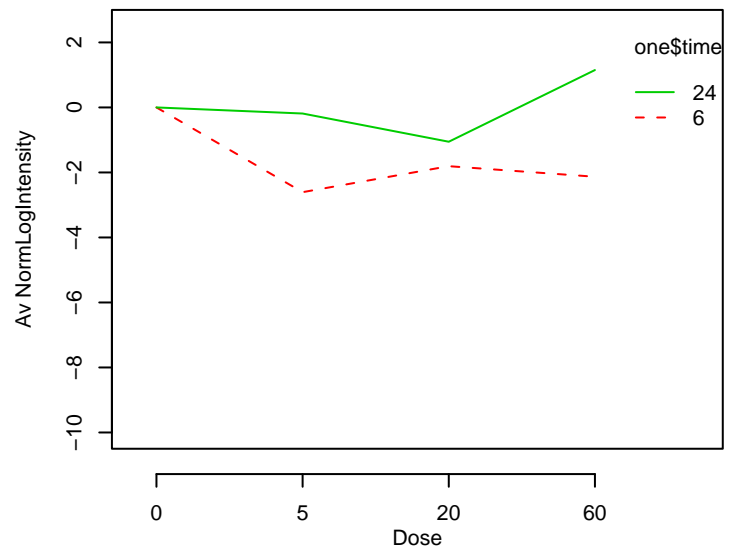

**GO\_0015804 : neutral amino acid transport**

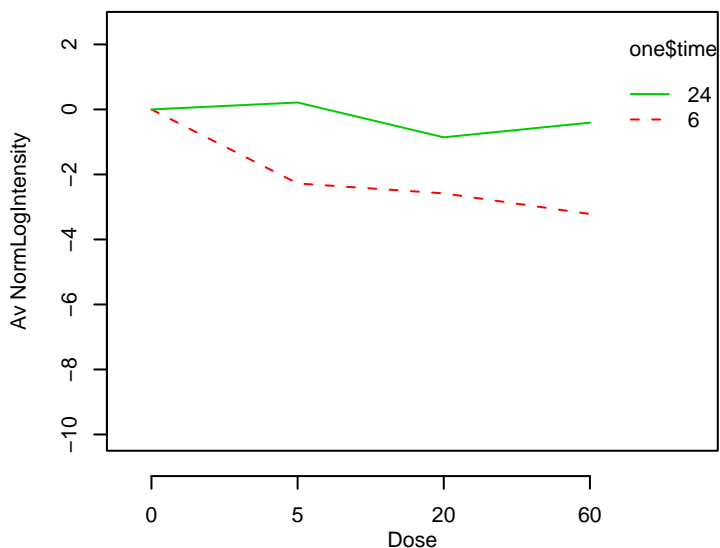

**GO\_0015807 : L-amino acid transport**

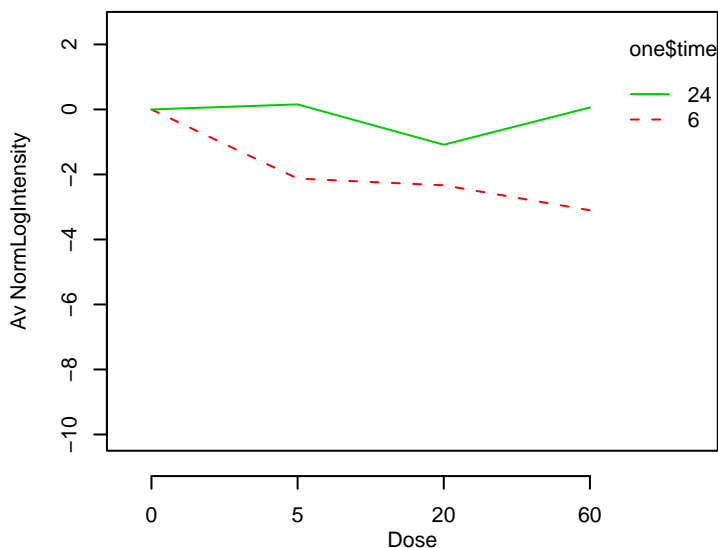

**GO\_0015813 : glutamate transport**

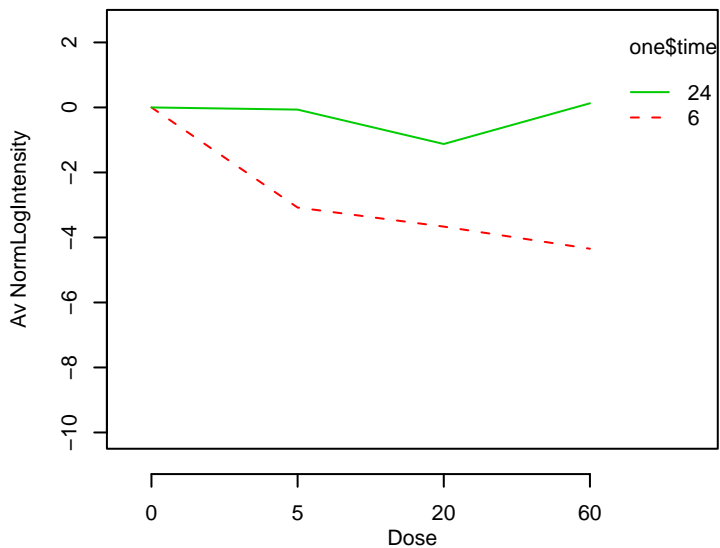

**GO\_0015833 : peptide transport**

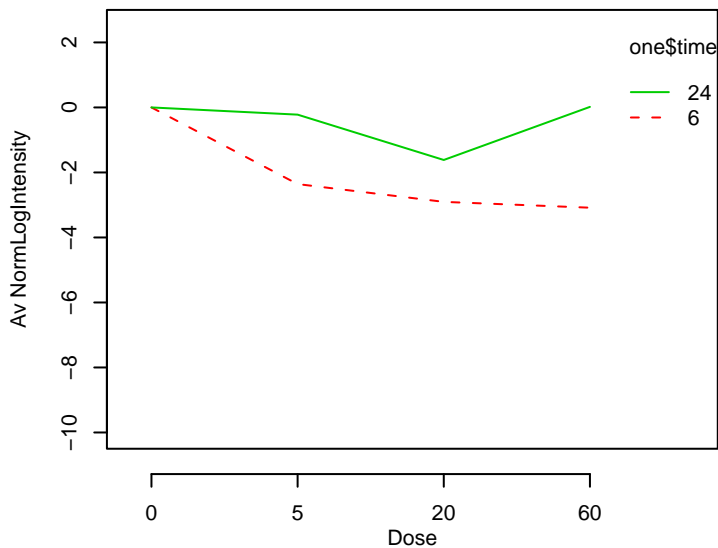

**GO\_0015837 : amine transport**

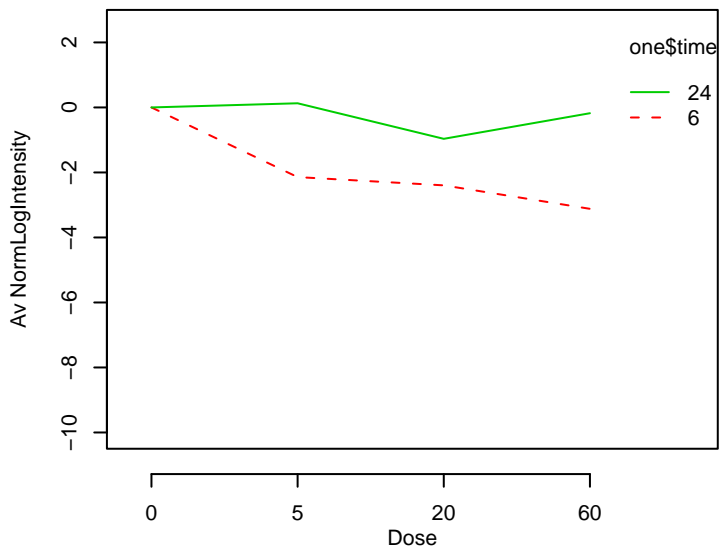

**GO\_0015844 : monoamine transport**

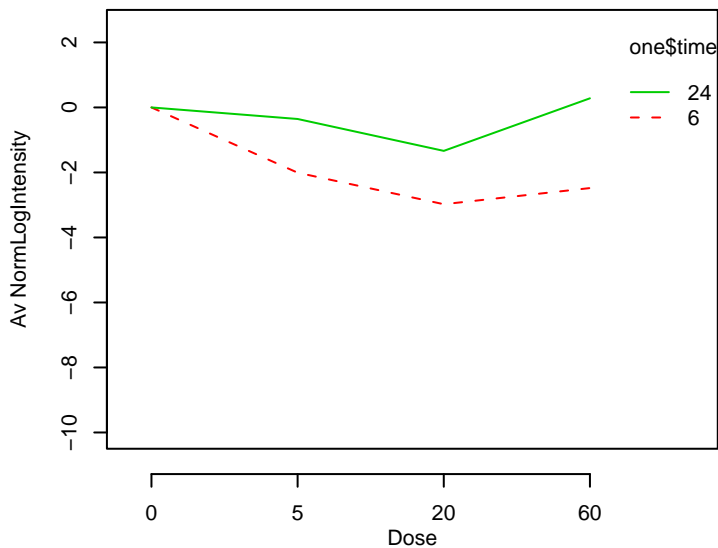

**GO\_0015849 : organic acid transport**

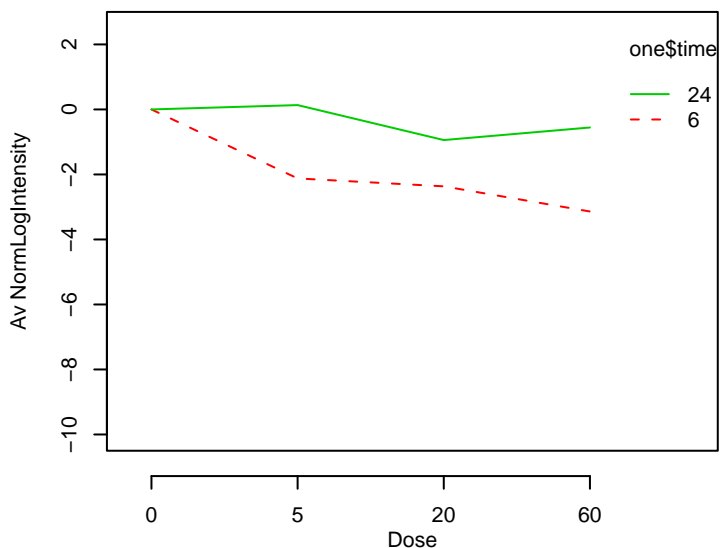

**GO\_0015858 : nucleoside transport**

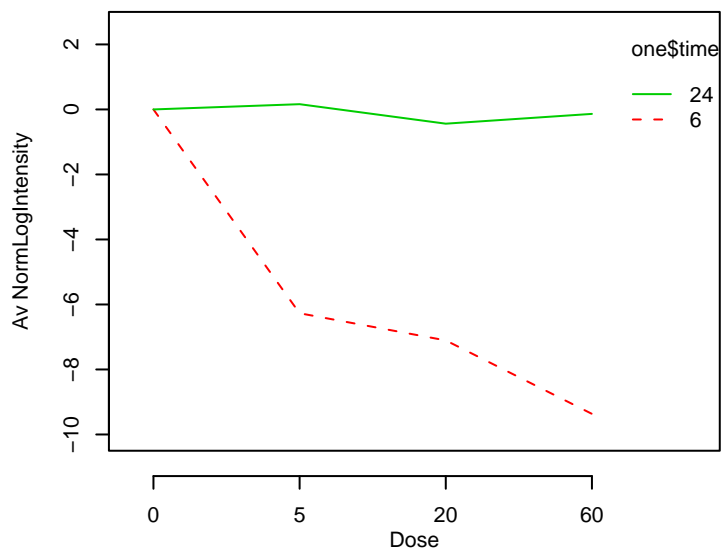

**GO\_0015884 : folic acid transport**

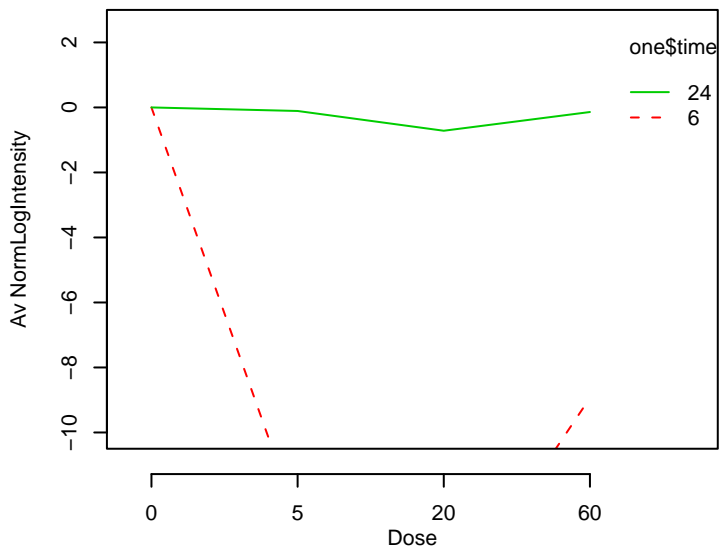

**GO\_0015893 : drug transport**

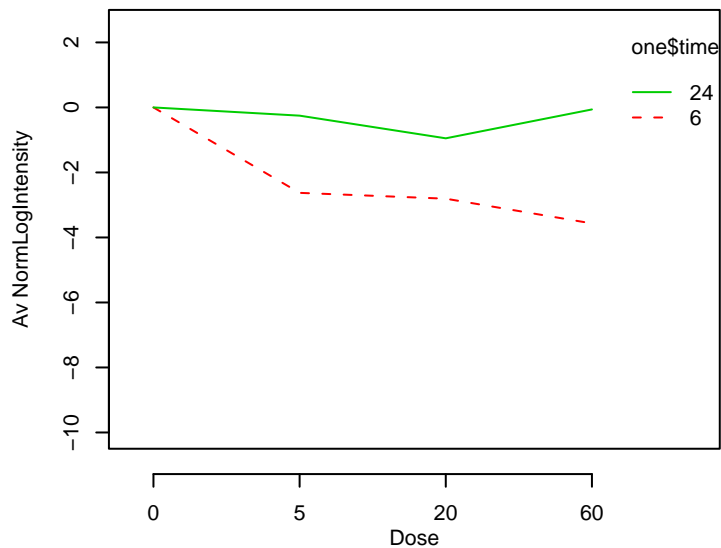

**GO\_0015904 : tetracycline transport**

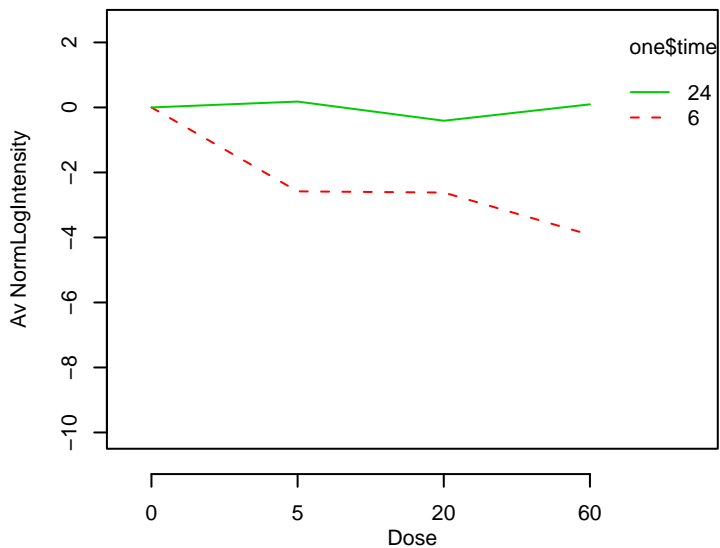

**GO\_0015908 : fatty acid transport**

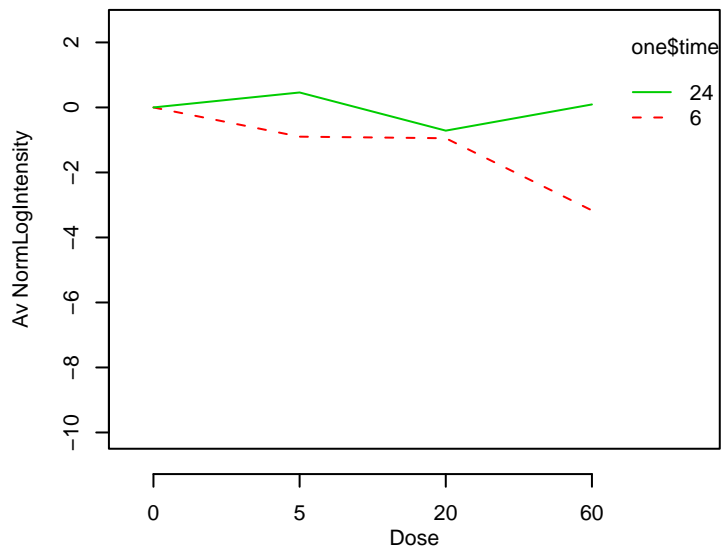

**GO\_0015918 : sterol transport**

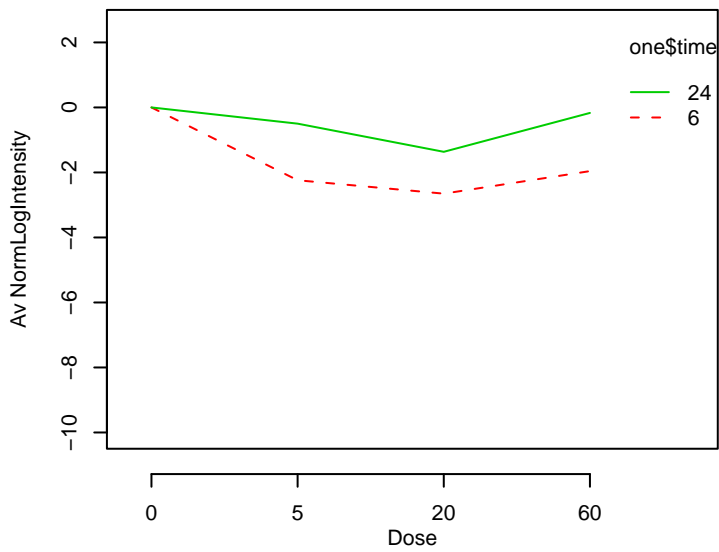

**GO\_0015931 : nucleobase\, nucleoside\, nucleotide and nucl**

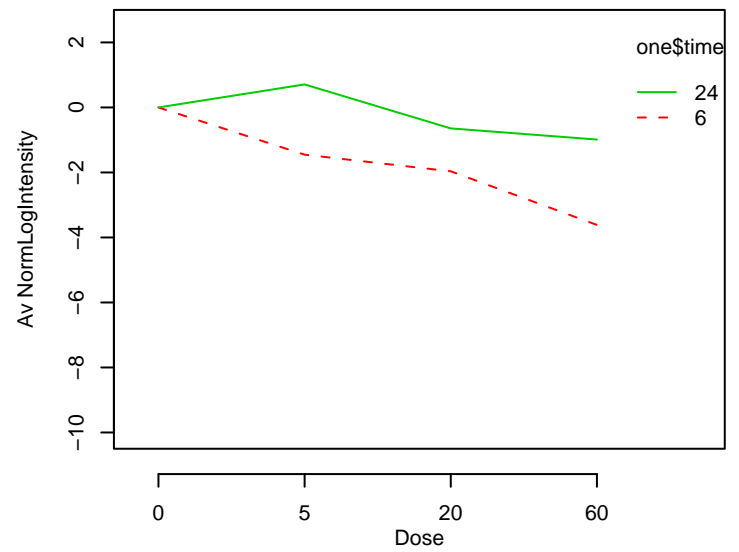

**GO\_0015936 : coenzyme A metabolism**

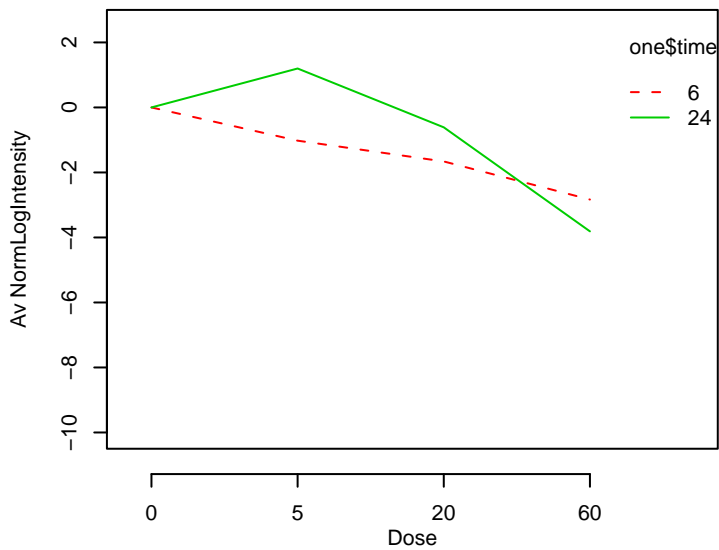

**GO\_0015937 : coenzyme A biosynthesis**

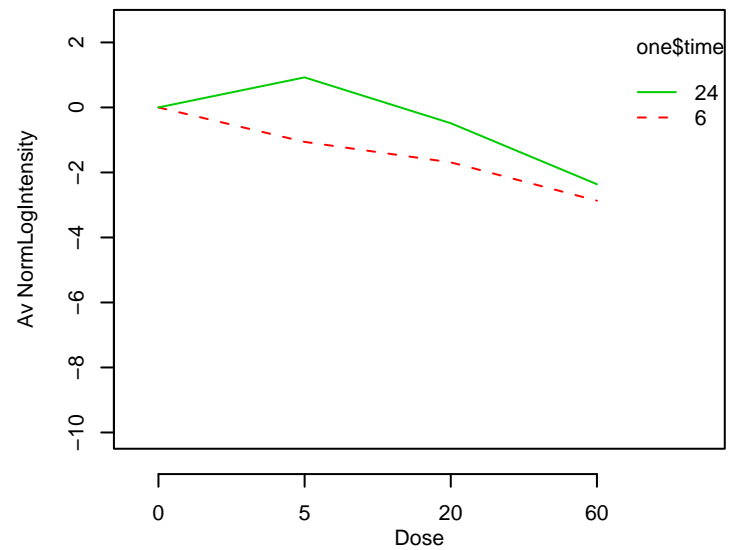

**io\_0015980 : energy derivation by oxidation of organic compO\_0015985 : energy coupled proton transport\, down electro**

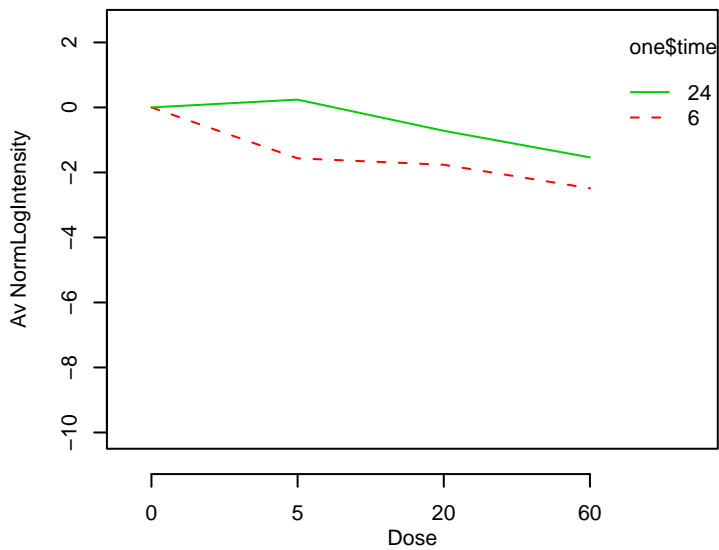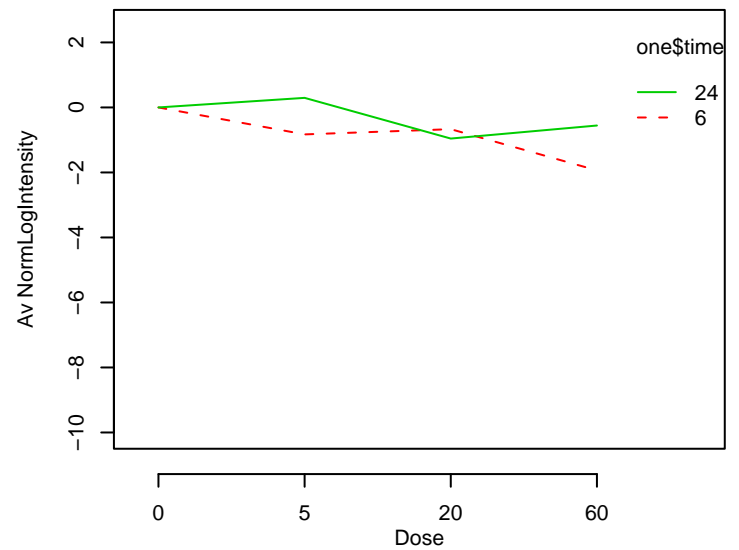



**GO\_0015986 : ATP synthesis coupled proton transport** **GO\_0015988 : energy coupled proton transport, against elec**

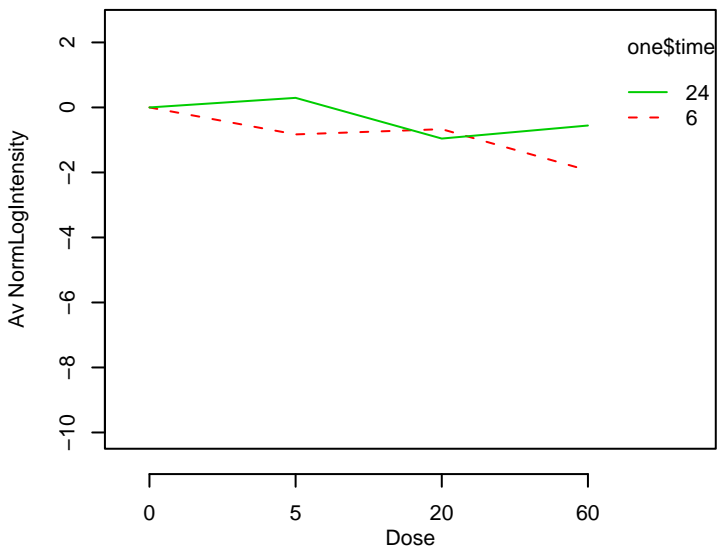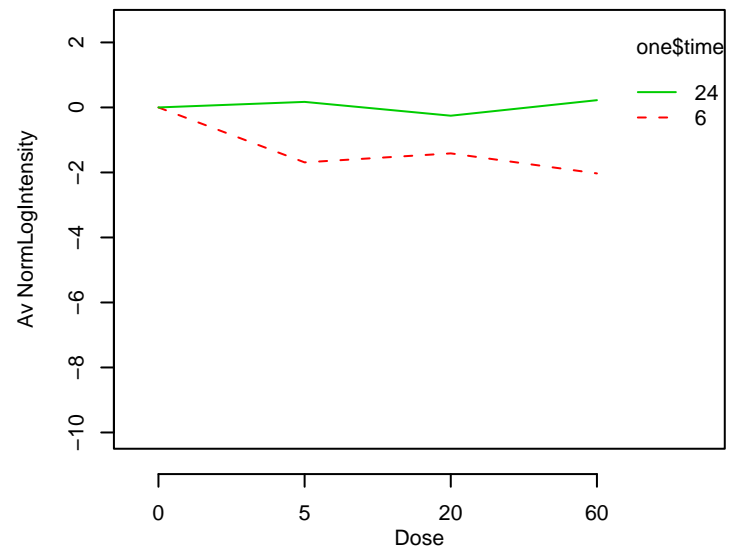

**GO\_0015991 : ATP hydrolysis coupled proton transport**

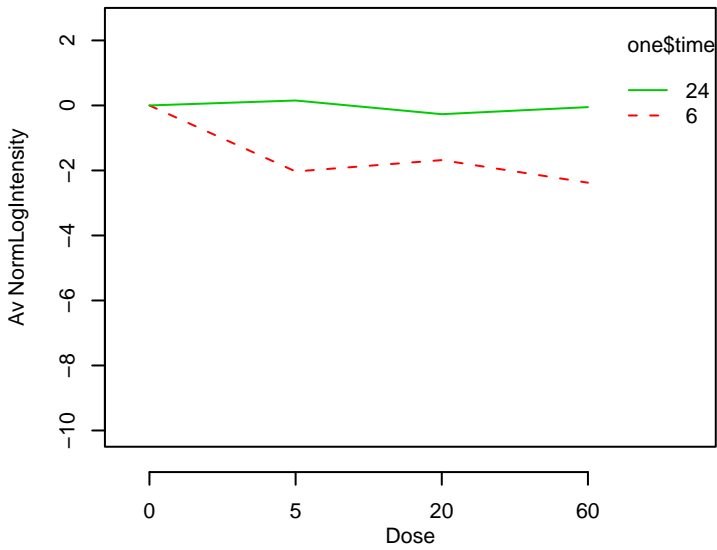

**GO\_0015992 : proton transport**

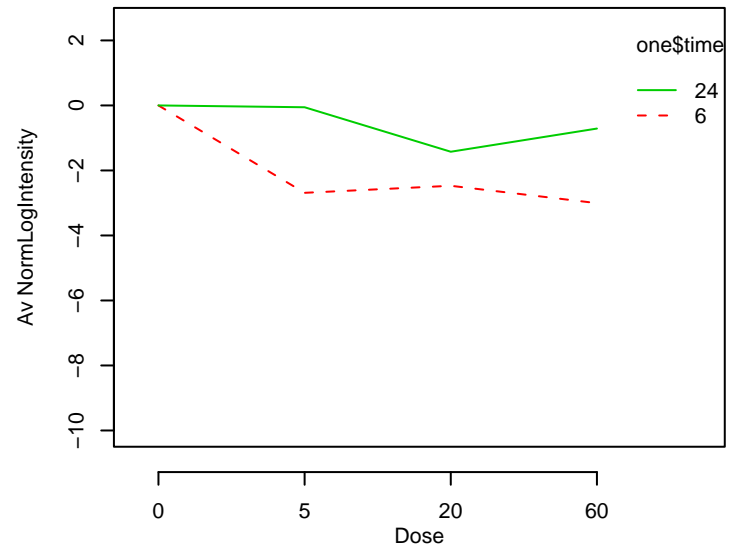

**GO\_0016032 : viral life cycle**

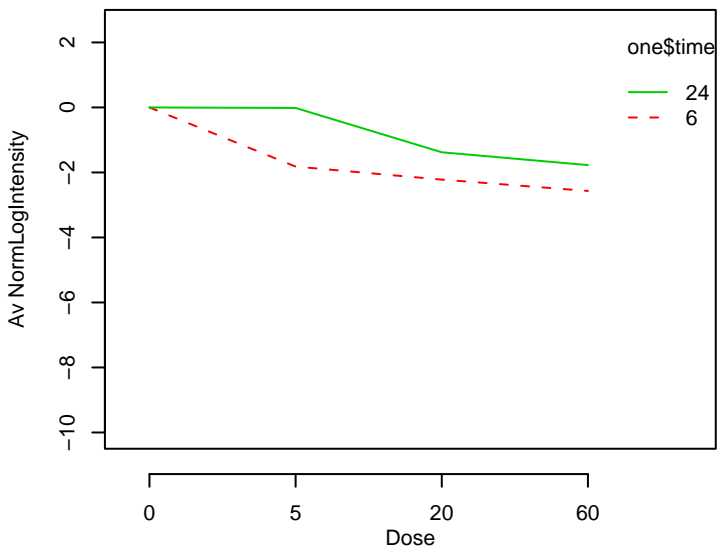

**GO\_0016042 : lipid catabolism**

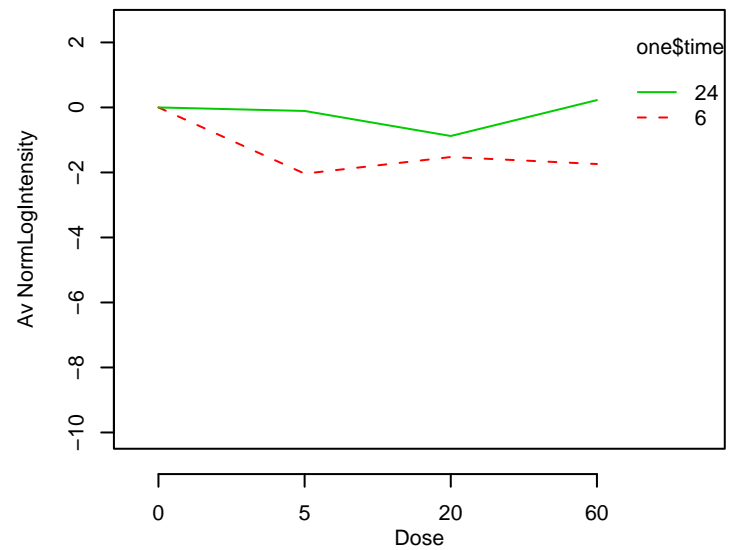

**GO\_0016044 : membrane organization and biogenesis**

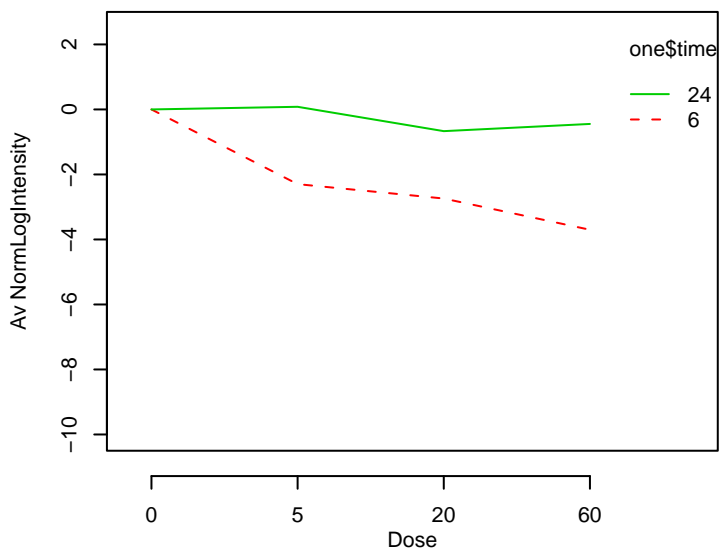

**GO\_0016045 : detection of bacterium**

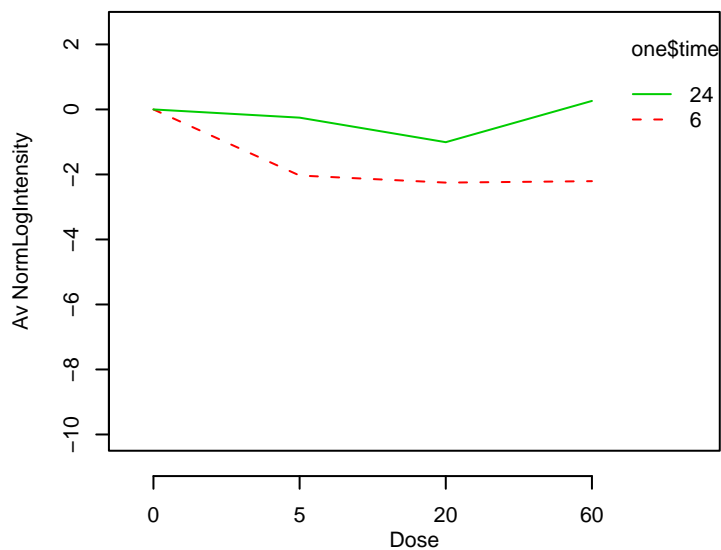

**GO\_0016049 : cell growth**

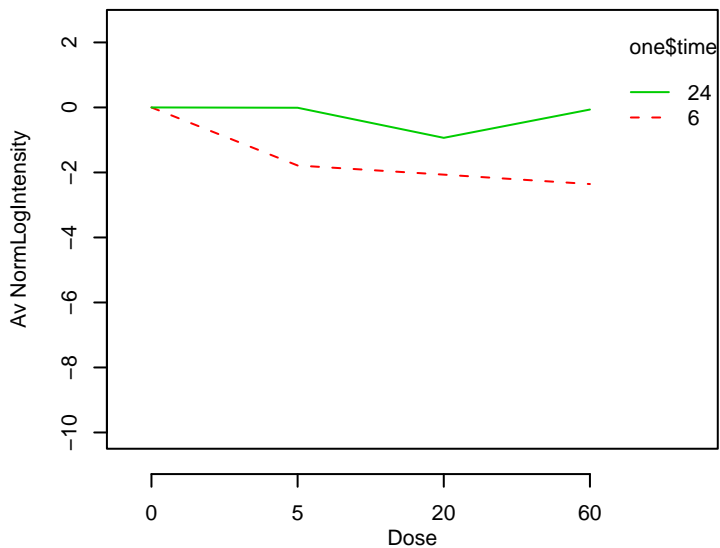

**GO\_0016051 : carbohydrate biosynthesis**

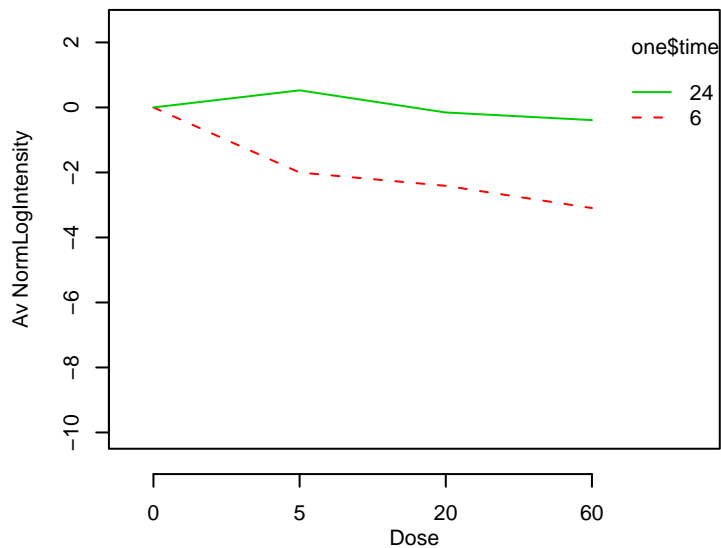

**GO\_0016052 : carbohydrate catabolism**

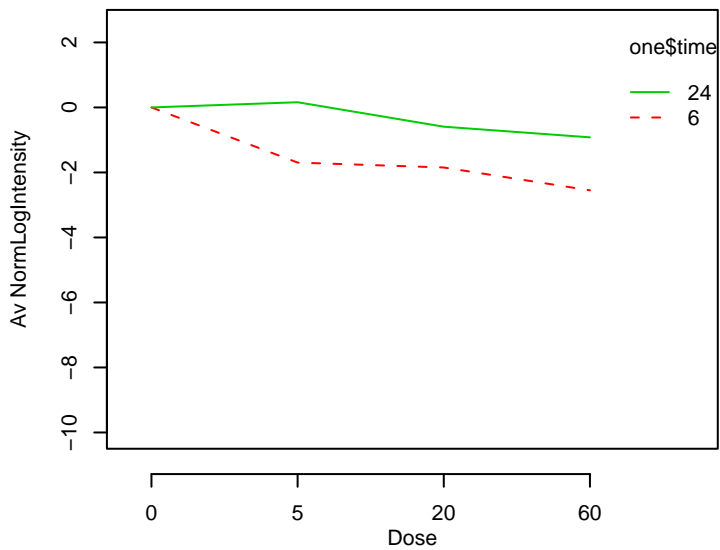

**GO\_0016053 : organic acid biosynthesis**

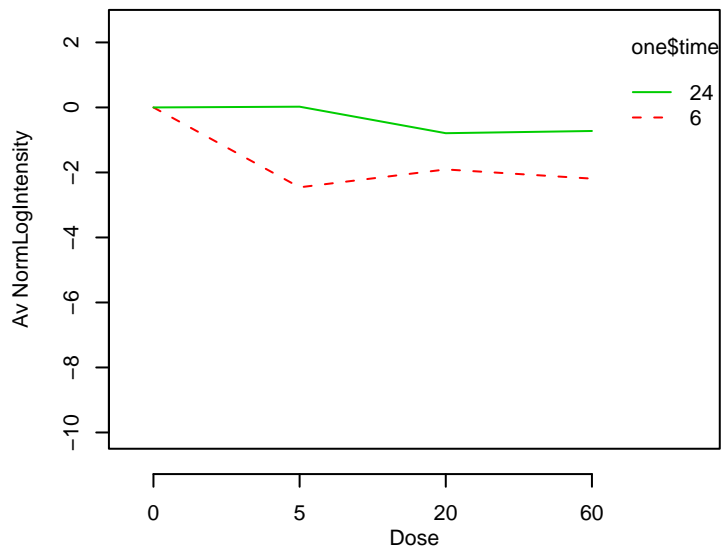

**GO\_0016054 : organic acid catabolism**

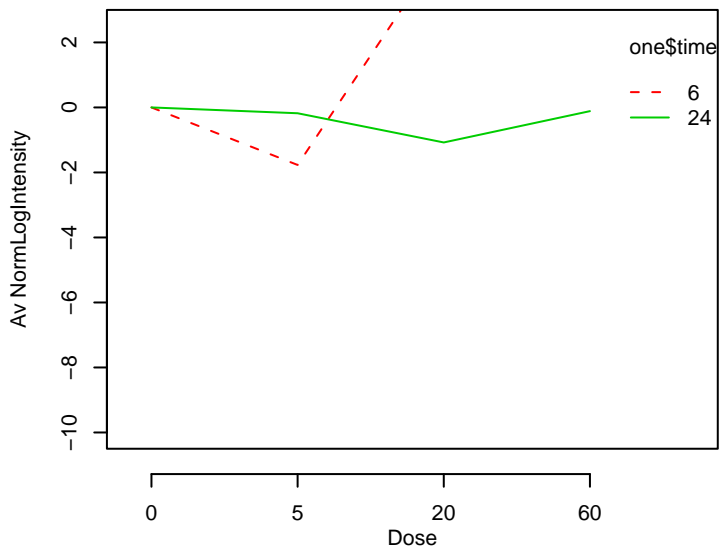

**GO\_0016055 : Wnt receptor signaling pathway**

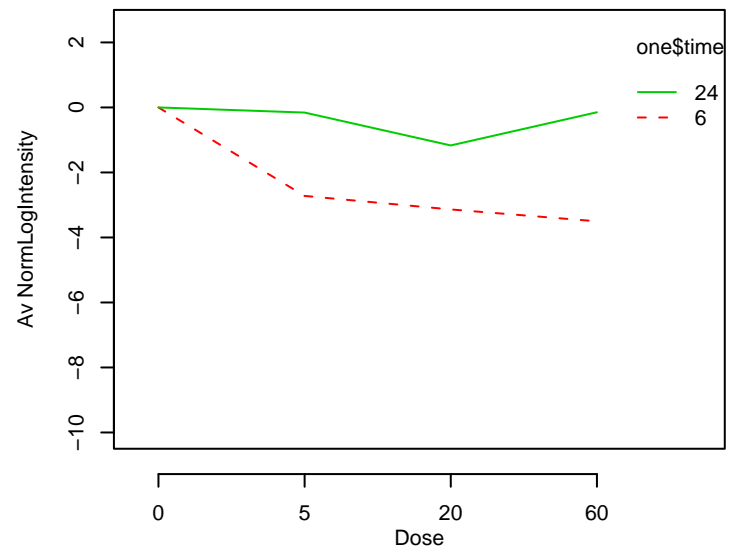

**GO\_0016064 : immunoglobulin mediated immune respons**

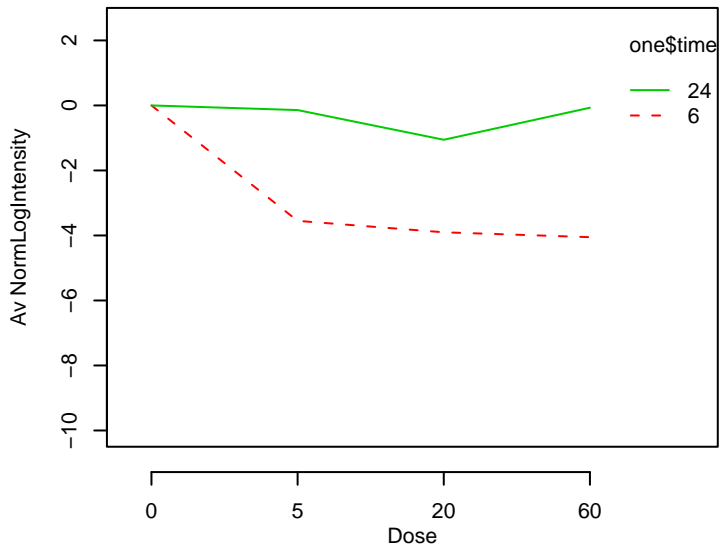

**GO\_0016071 : mRNA metabolism**

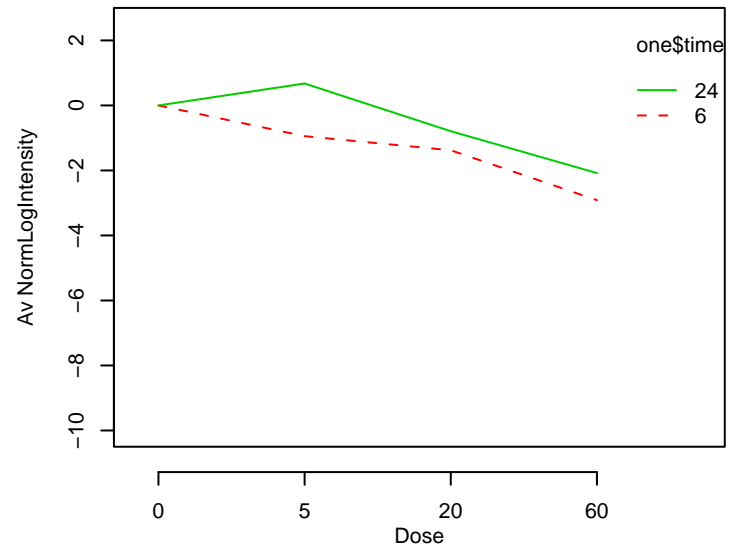

**GO\_0016072 : rRNA metabolism**

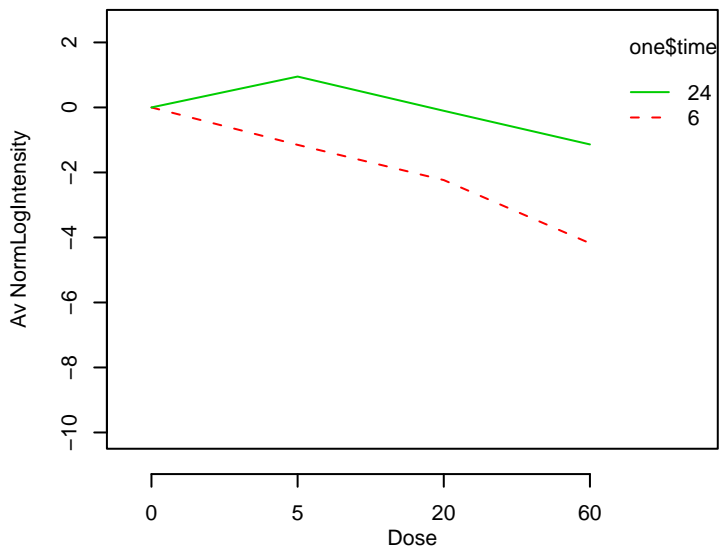

**GO\_0016073 : snRNA metabolism**

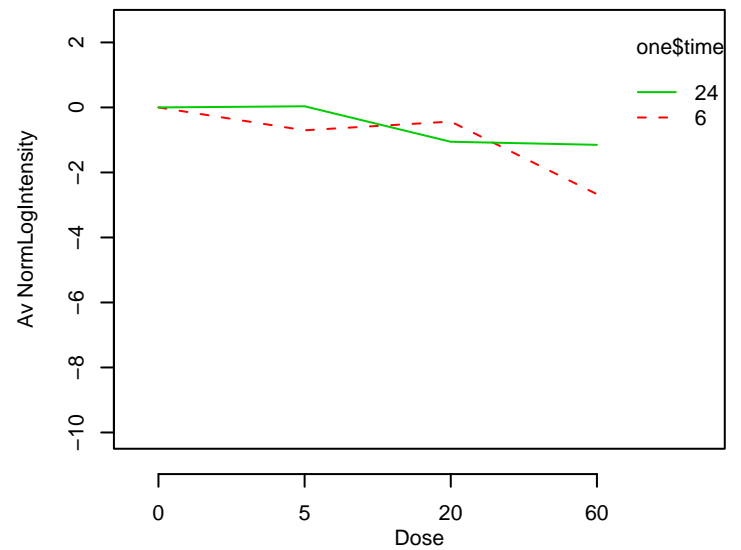

**GO\_0016079 : synaptic vesicle exocytosis**

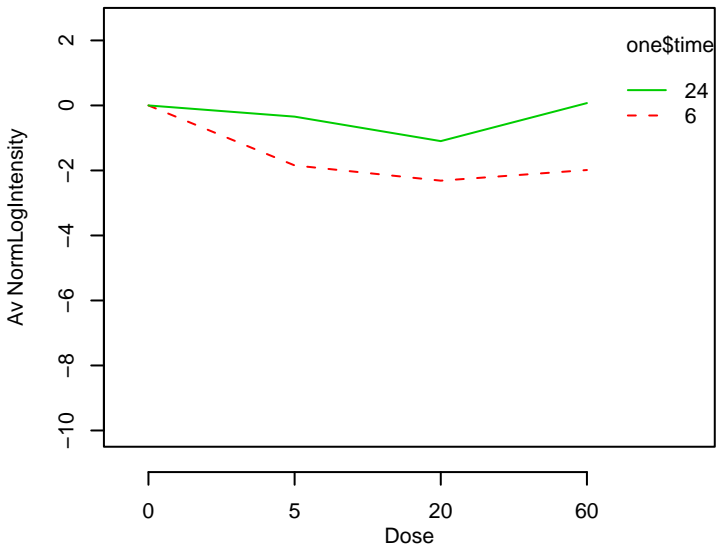

**GO\_0016096 : polyisoprenoid metabolism**



**GO\_0016108 : tetraterpenoid metabolism**

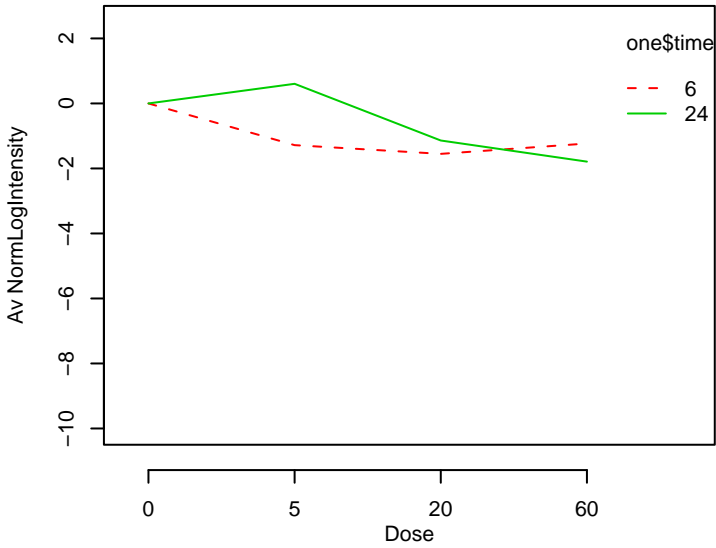

**GO\_0016116 : carotenoid metabolism**

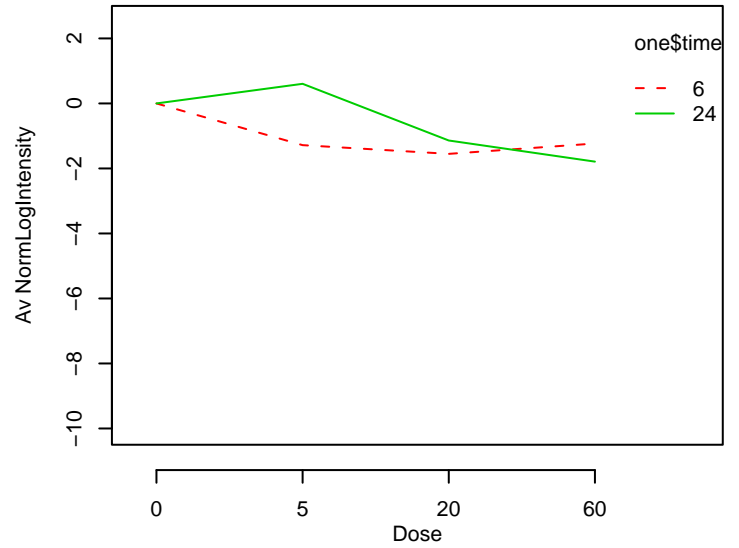

**GO\_0016125 : sterol metabolism**

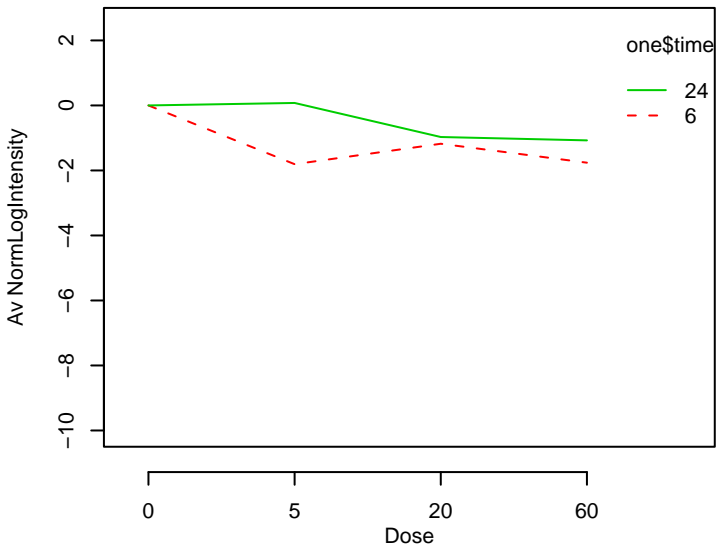

**GO\_0016126 : sterol biosynthesis**

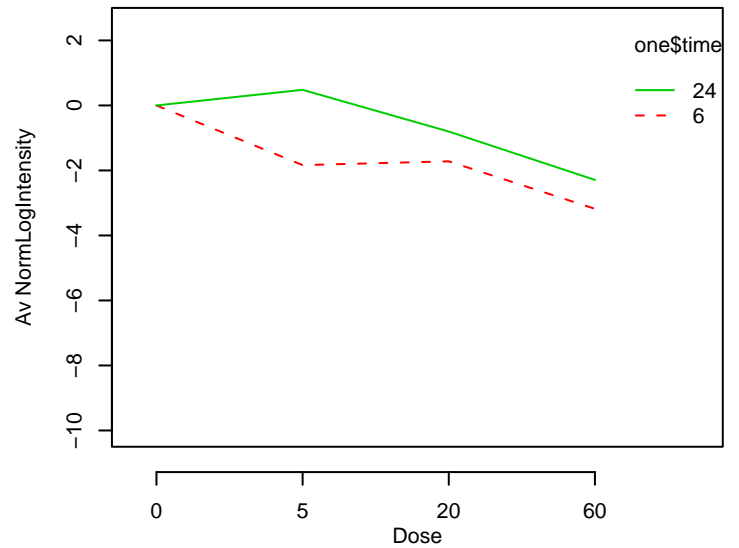

**GO\_0016127 : sterol catabolism**

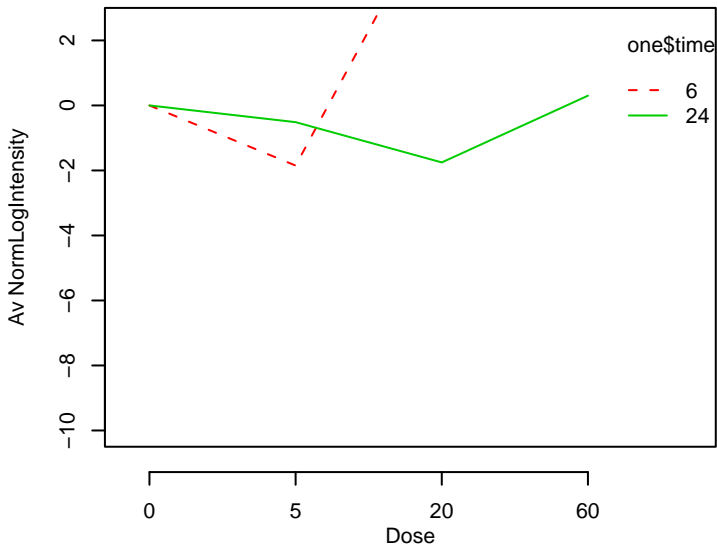

**GO\_0016180 : snRNA processing**

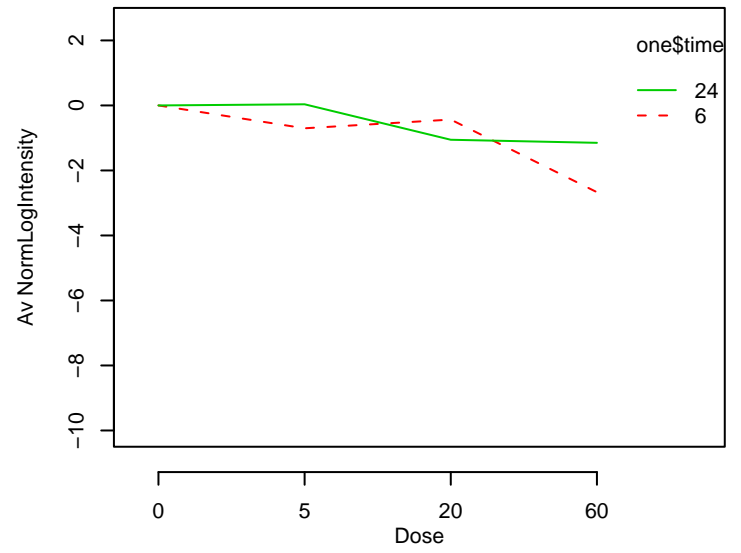

**GO\_0016197 : endosome transport**

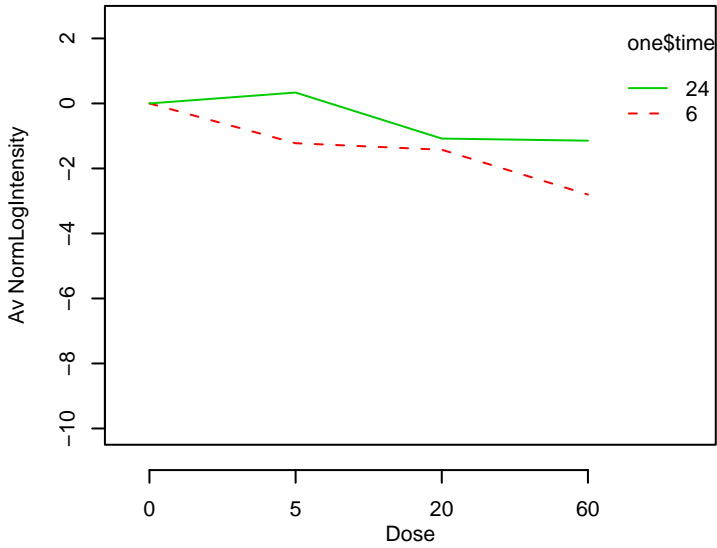

**GO\_0016202 : regulation of striated muscle development**

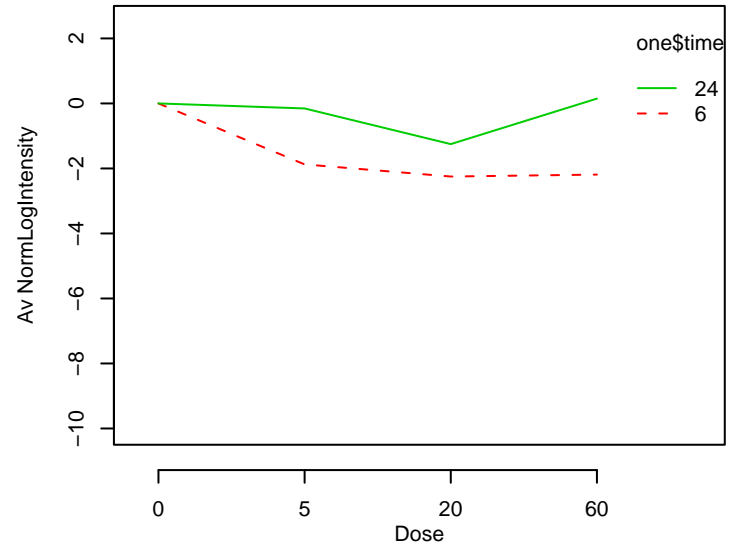

**GO\_0016236 : macroautophagy**

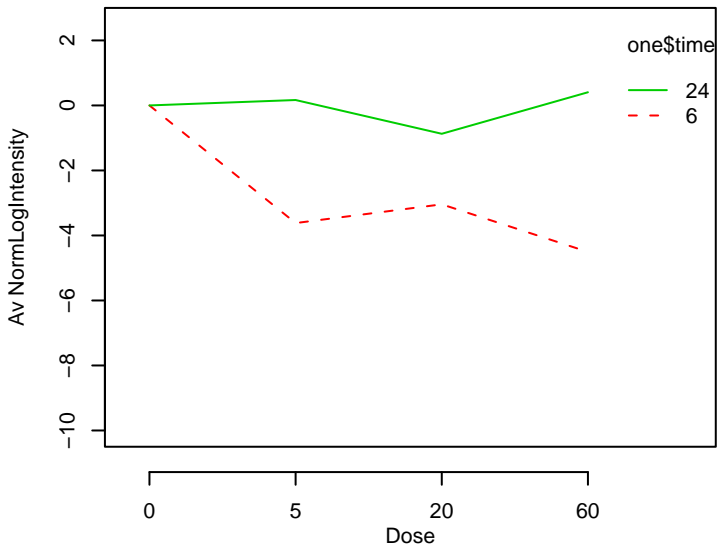

**GO\_0016255 : attachment of GPI anchor to protein**

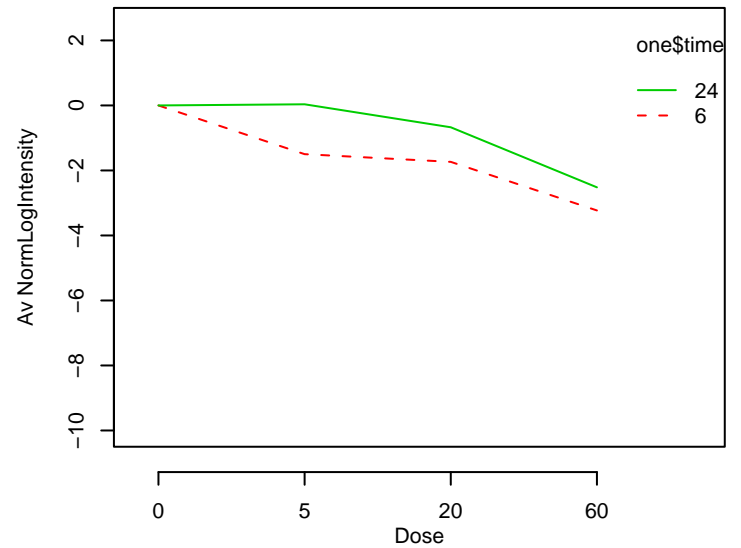

**GO\_0016311 : dephosphorylation**

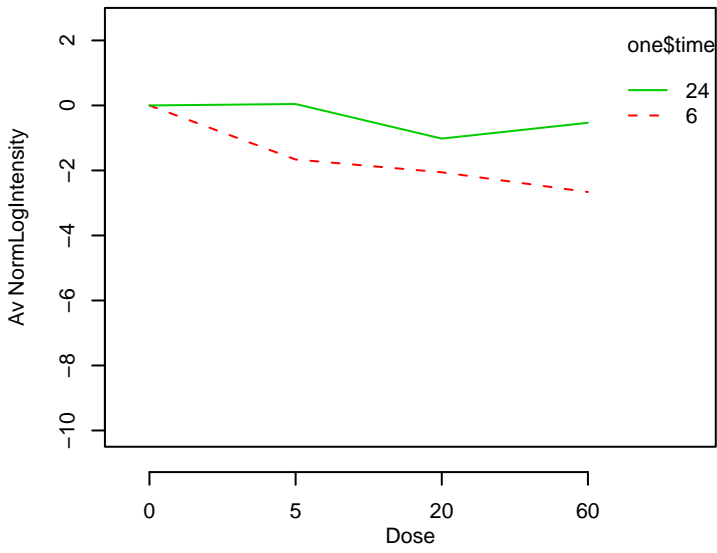

**GO\_0016322 : neuron remodeling**

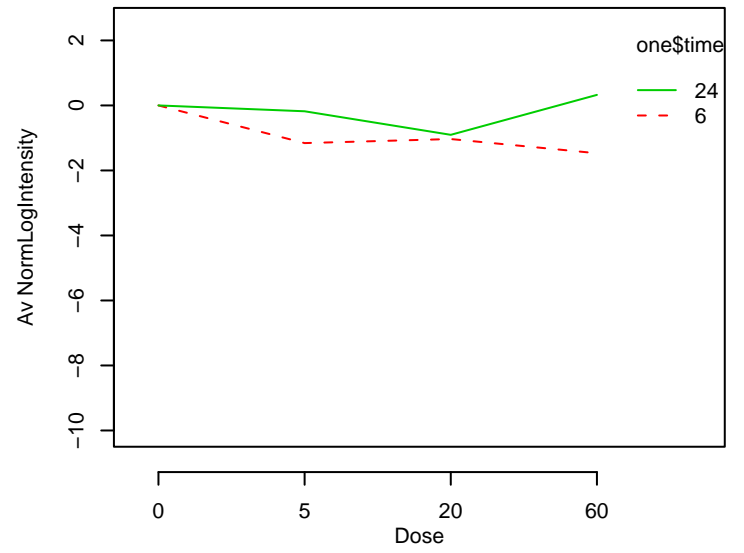

**GO\_0016331 : morphogenesis of embryonic epithelium**

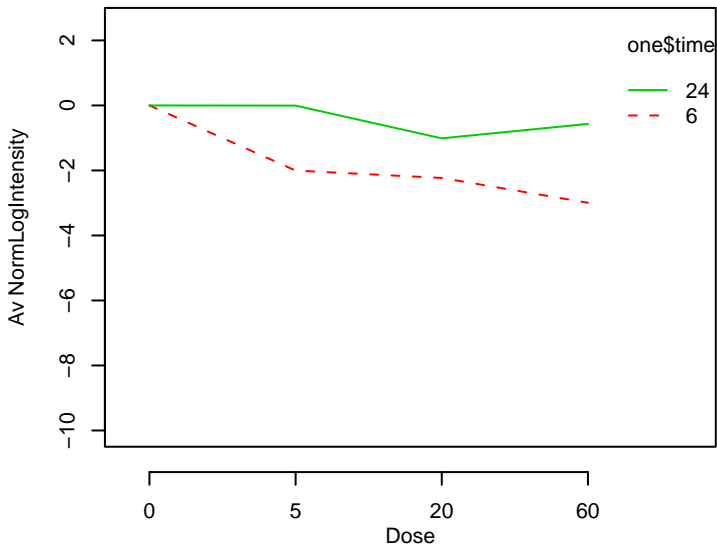

**GO\_0016337 : cell-cell adhesion**

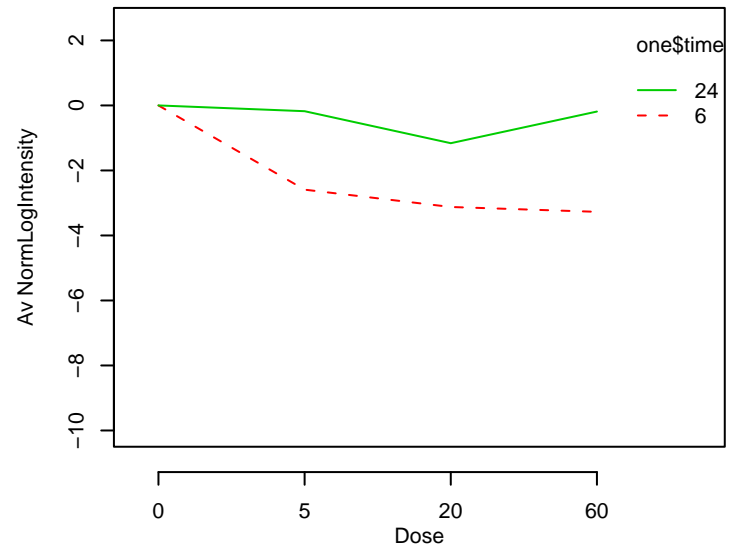

**GO\_0016338 : calcium-independent cell-cell adhesion**

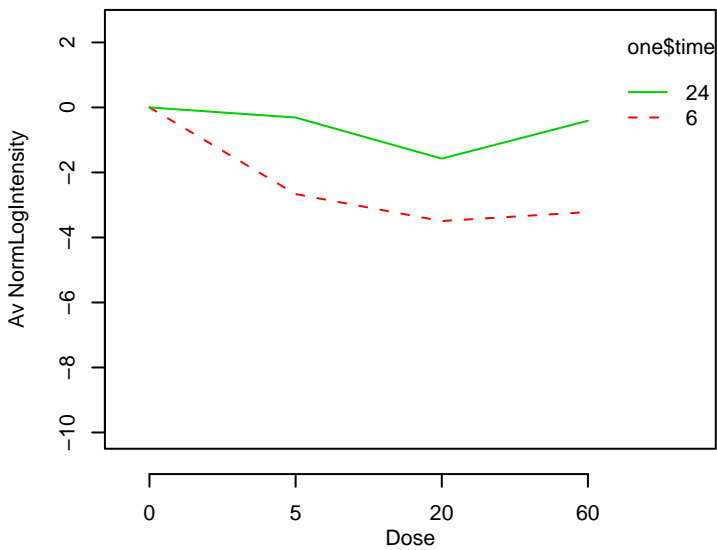

**GO\_0016339 : calcium-dependent cell-cell adhesion**

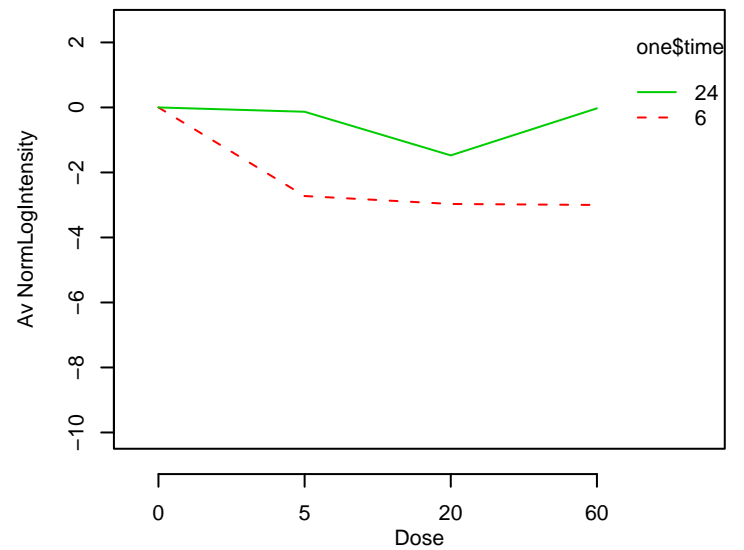

**GO\_0016358 : dendrite development**

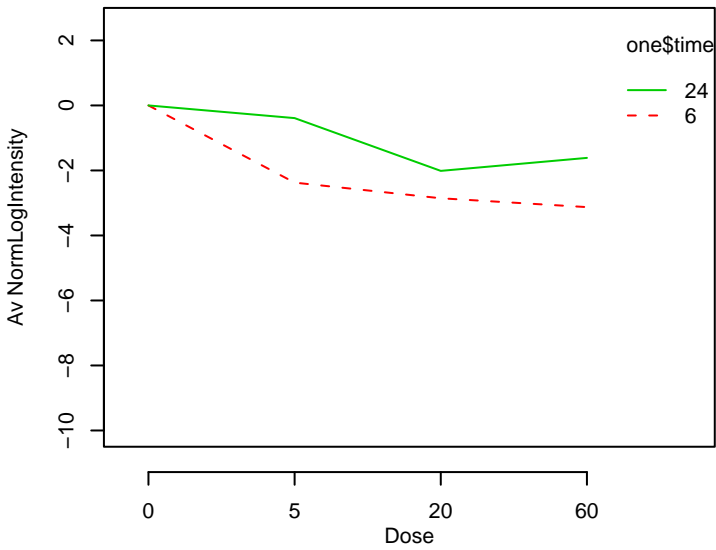

**GO\_0016444 : somatic cell DNA recombination**

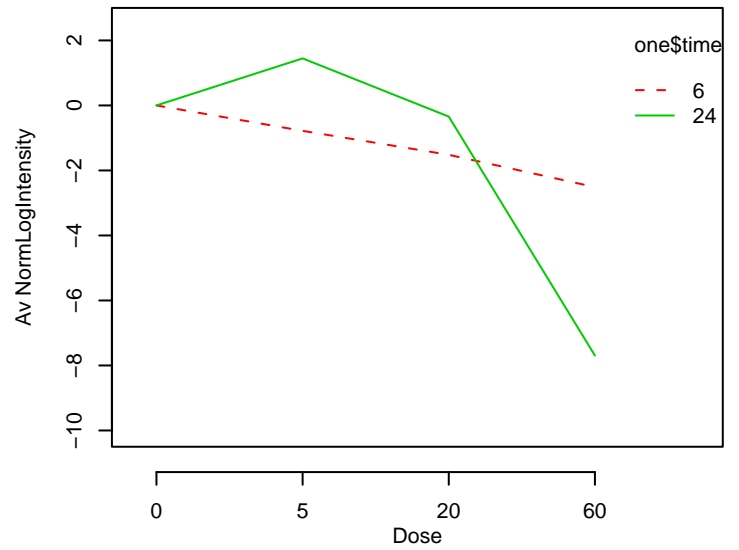

**GO\_0016445 : somatic diversification of immunoglobulin:GO\_0016446 : somatic hypermutation of immunoglobulin ge**

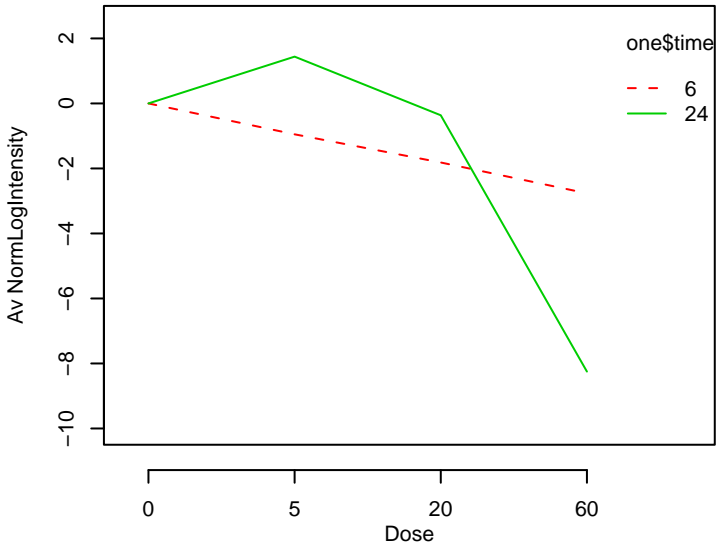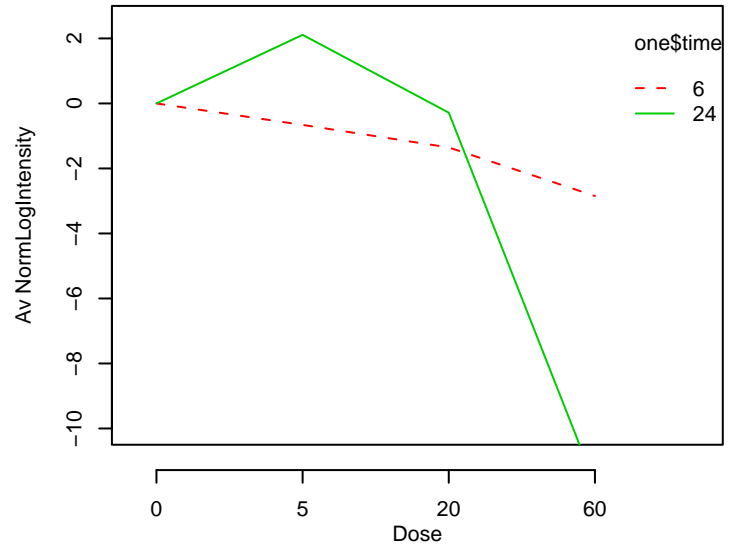

**GO\_0016458 : gene silencing**

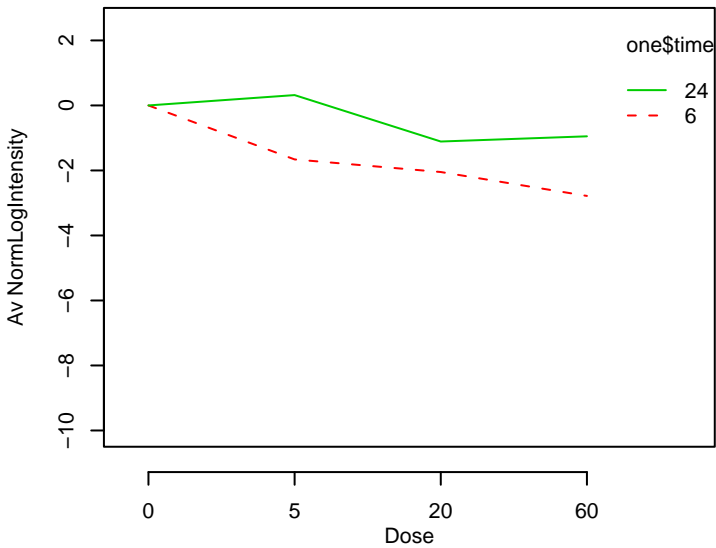

**GO\_0016477 : cell migration**

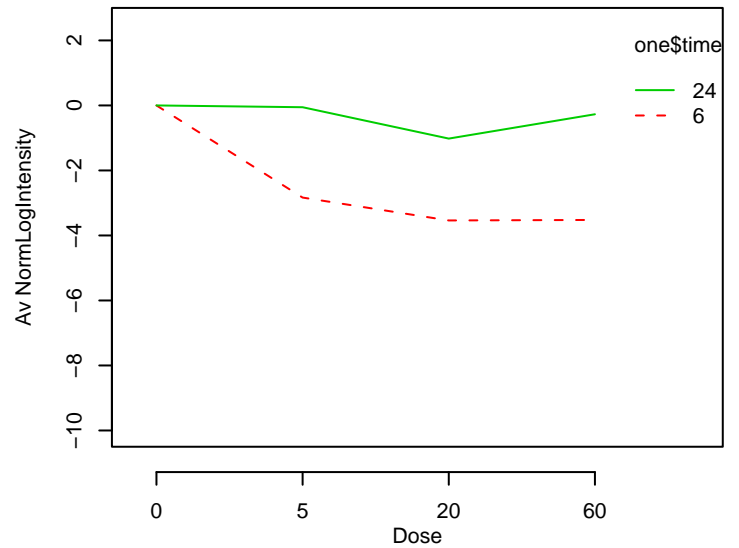

**GO\_0016478 : negative regulation of translation**

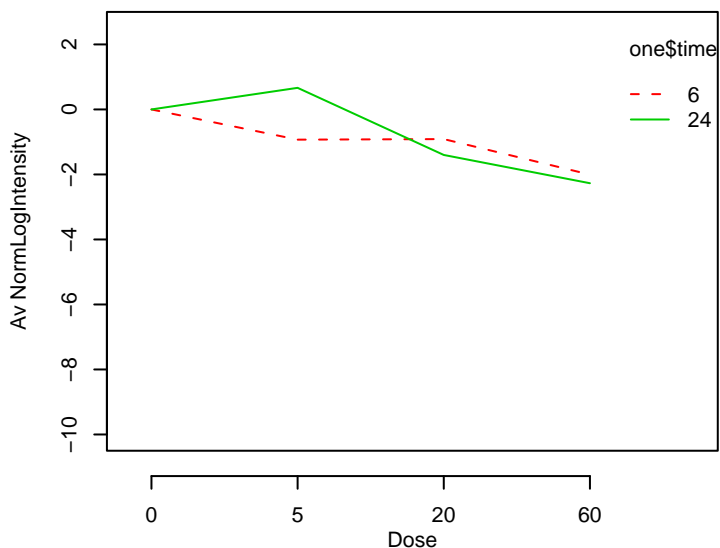

**GO\_0016485 : protein processing**

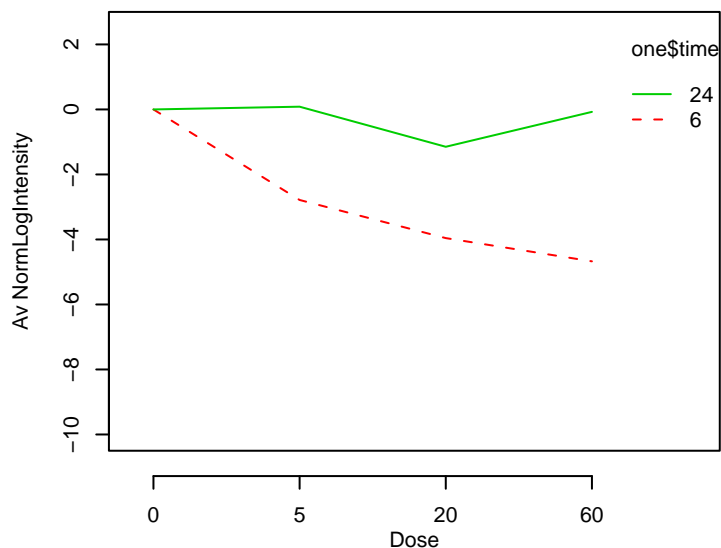

**GO\_0016486 : peptide hormone processing**

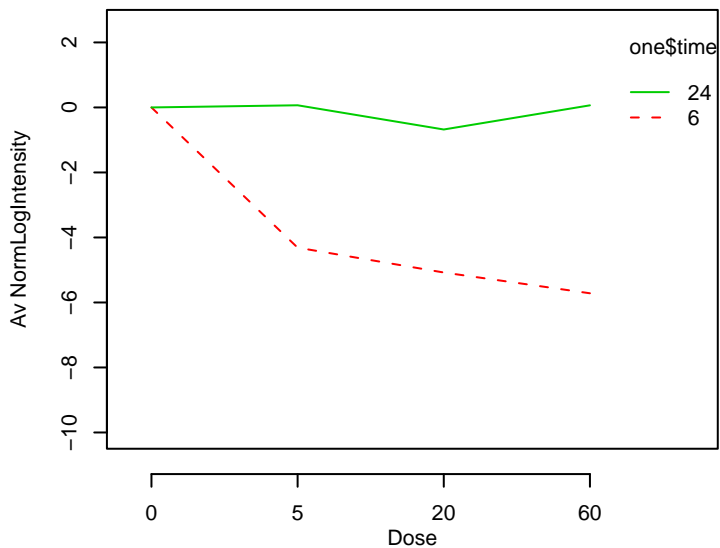

**GO\_0016525 : negative regulation of angiogenesis**

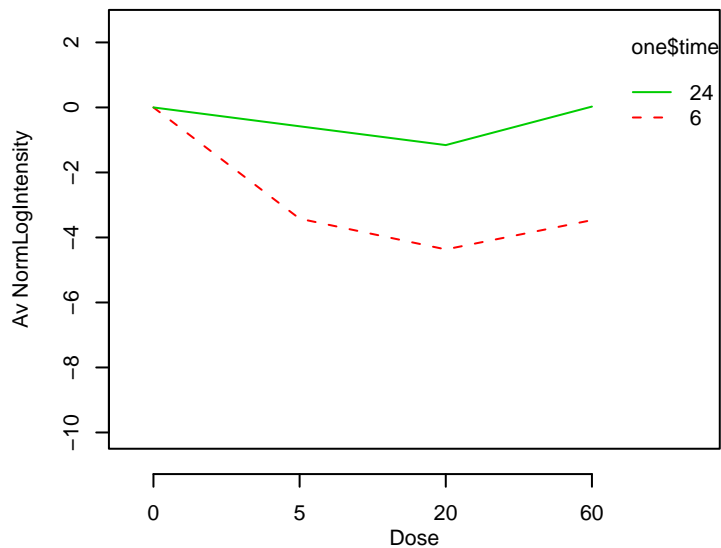

**GO\_0016540 : protein autoprocessing**

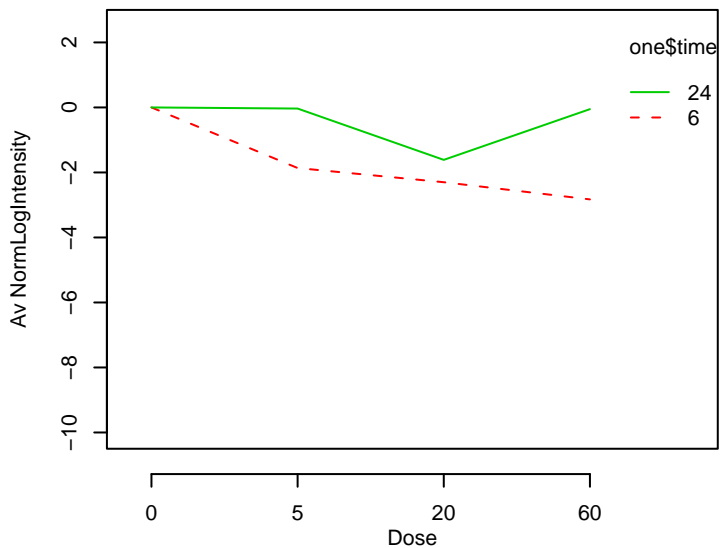

**GO\_0016547 : RNA editing**

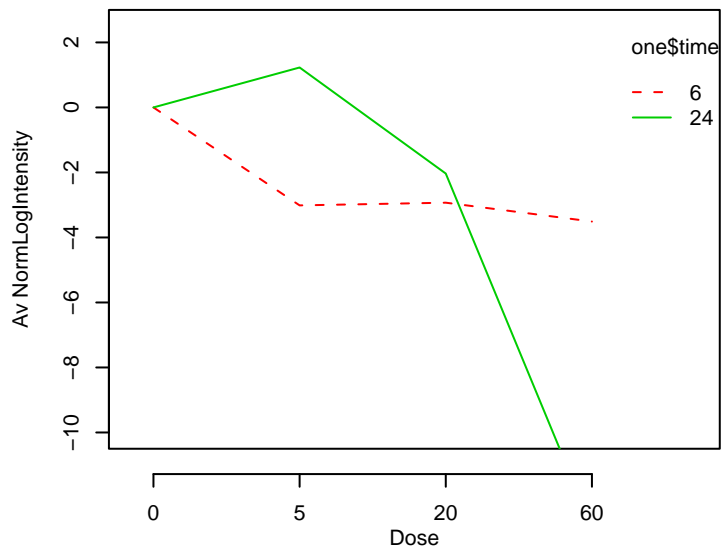



**GO\_0016556 : mRNA modification**

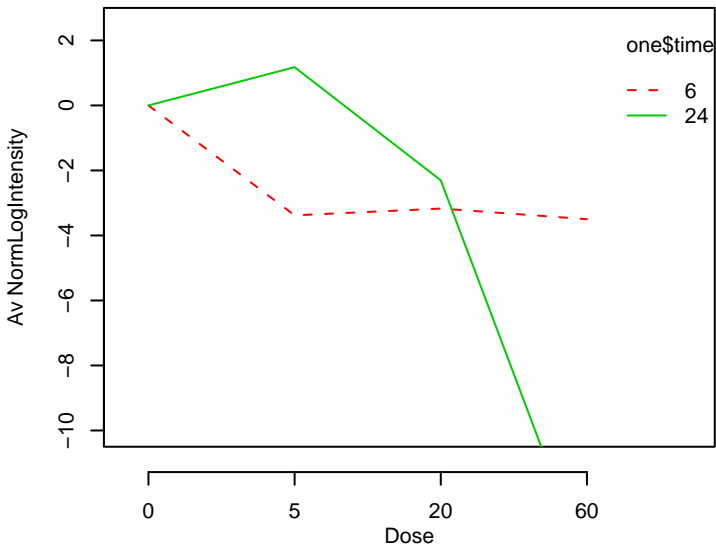

**GO\_0016567 : protein ubiquitination**

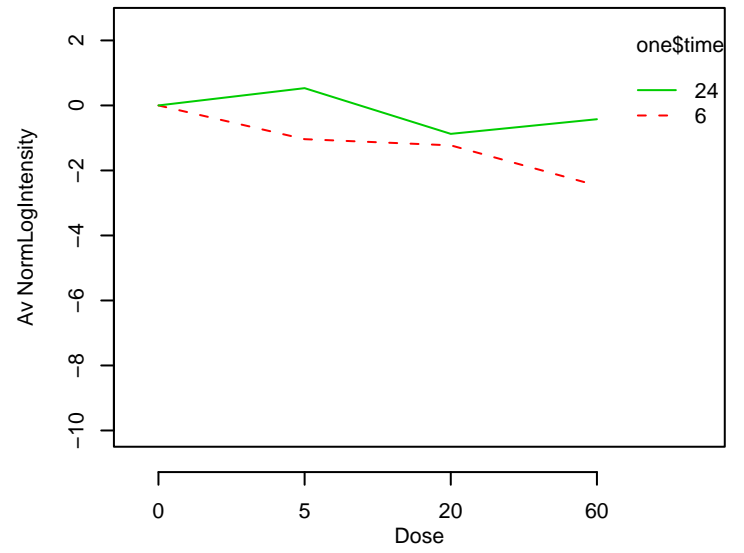

**GO\_0016568 : chromatin modification**

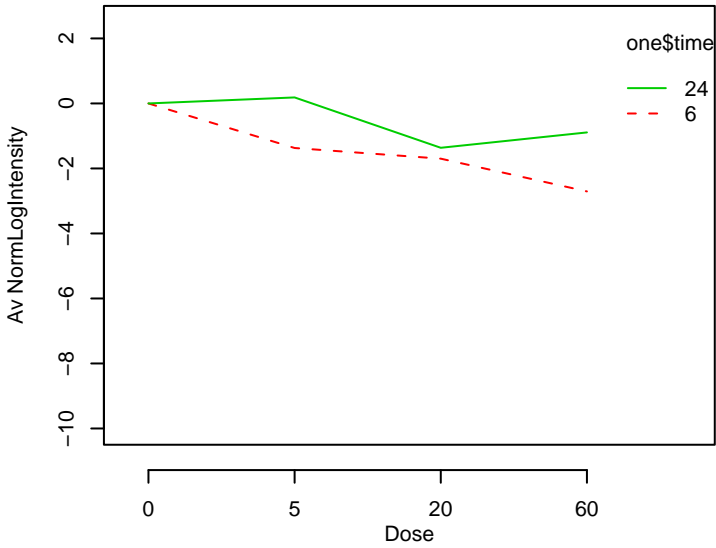

**GO\_0016569 : covalent chromatin modification**

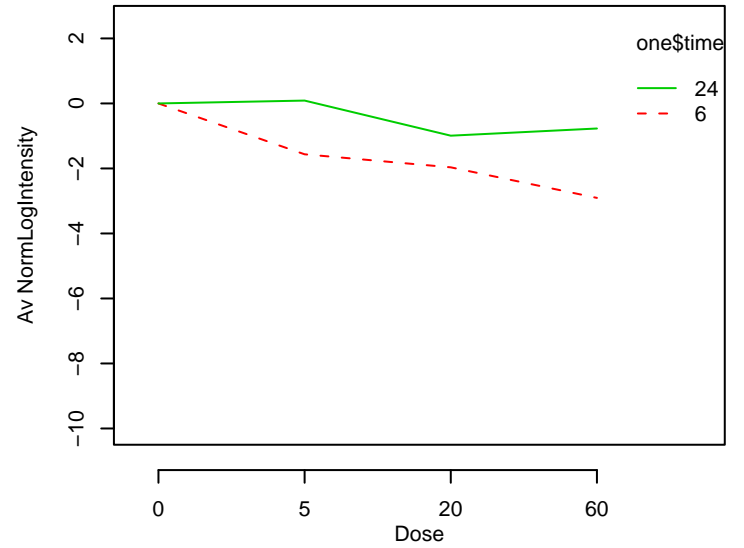

**GO\_0016570 : histone modification**

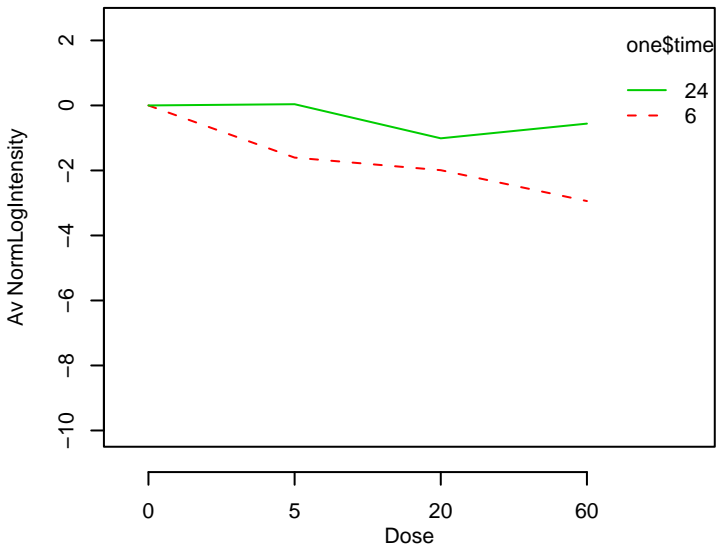

**GO\_0016571 : histone methylation**

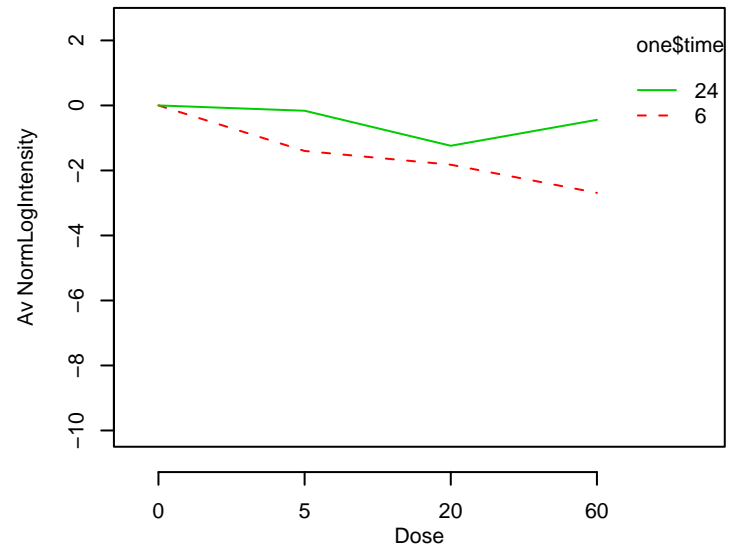

**GO\_0016573 : histone acetylation**

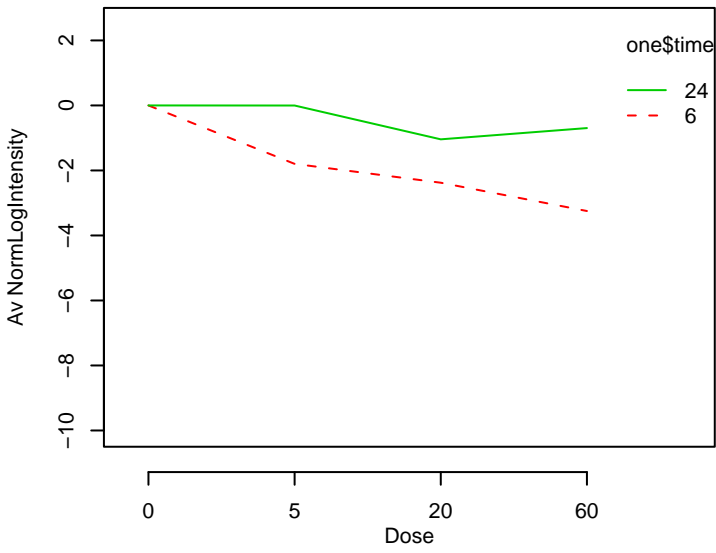

**GO\_0016574 : histone ubiquitination**

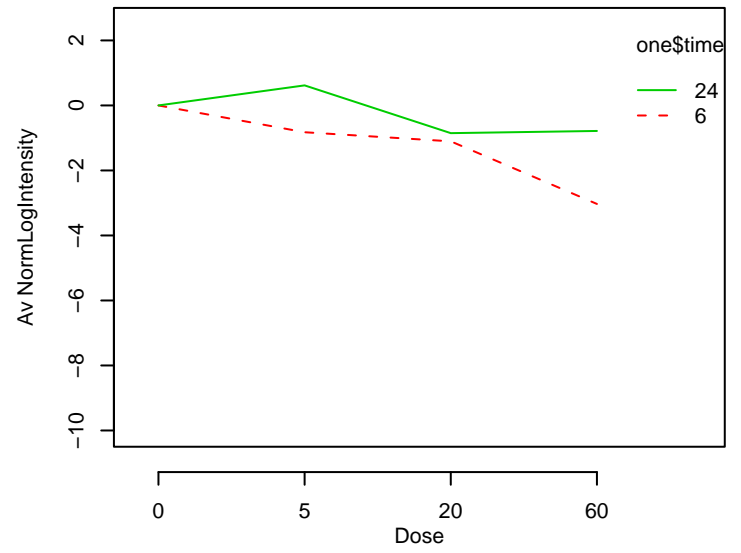

**GO\_0016575 : histone deacetylation**

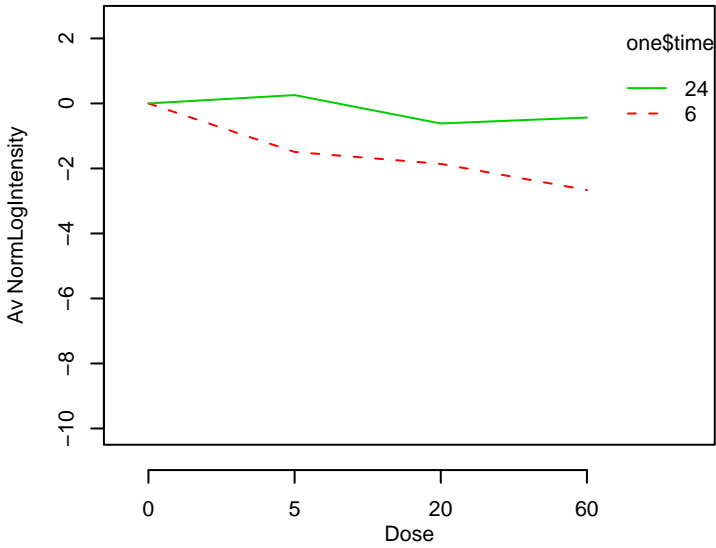

**GO\_0016584 : nucleosome spacing**

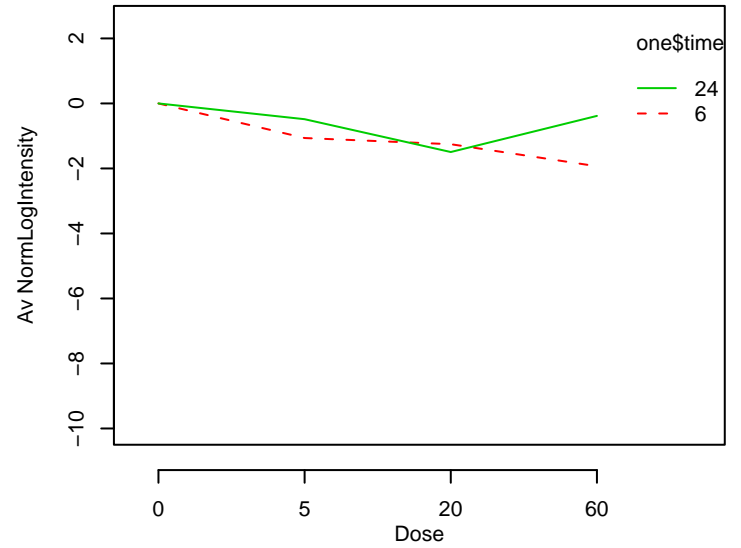

**GO\_0016601 : Rac protein signal transduction**

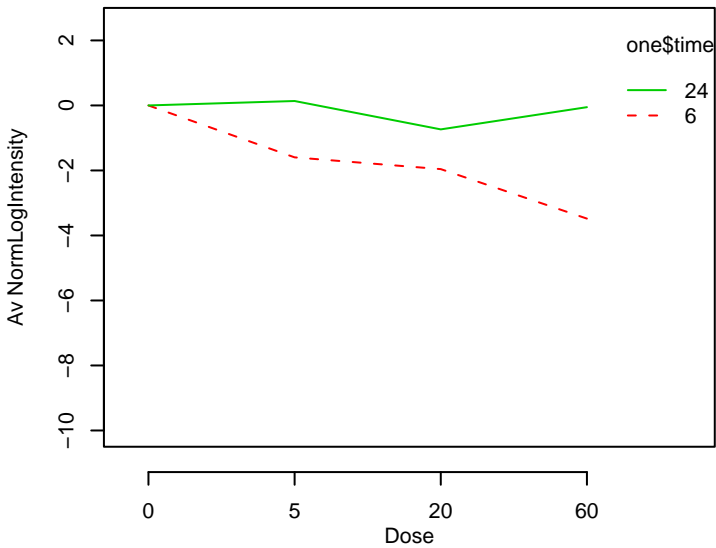

**GO\_0016925 : protein sumoylation**

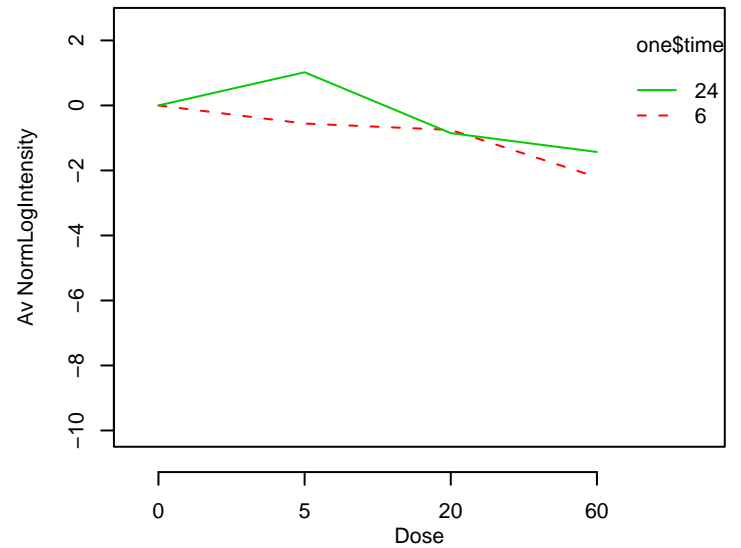

**GO\_0016998 : cell wall catabolism**

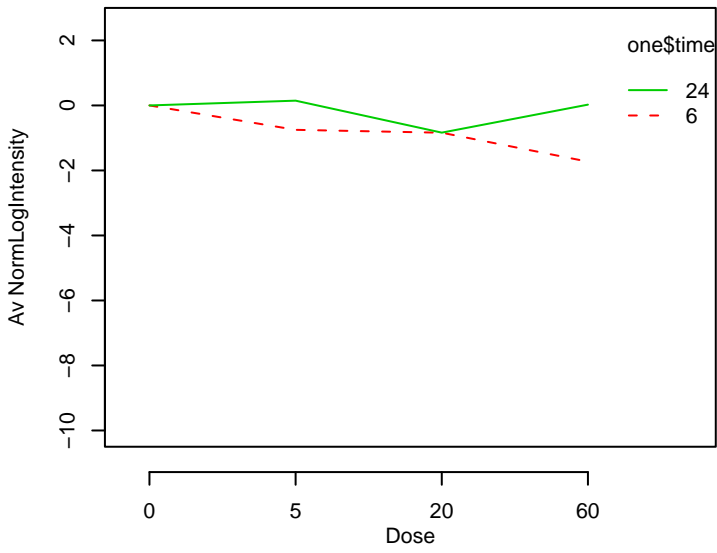

**GO\_0017015 : regulation of transforming growth factor beta i**

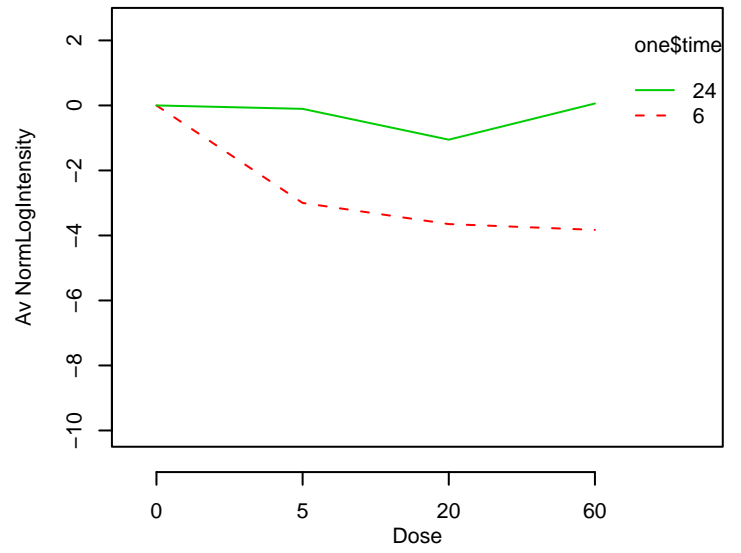

**GO\_0017038 : protein import**

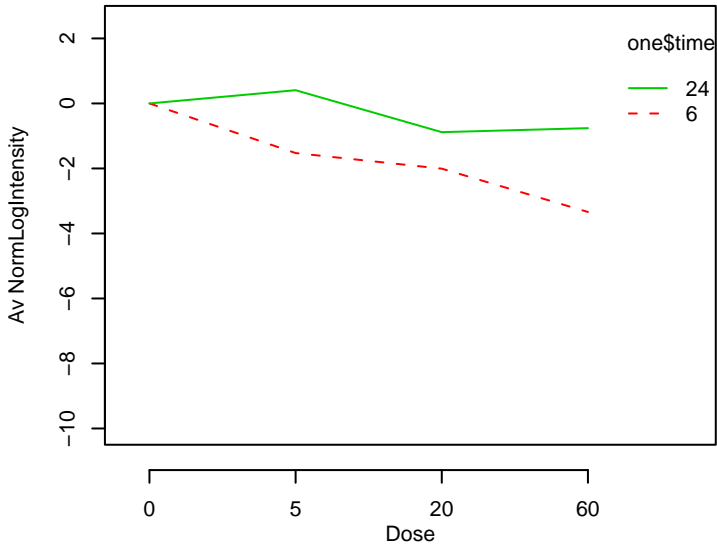

**GO\_0017144 : drug metabolism**

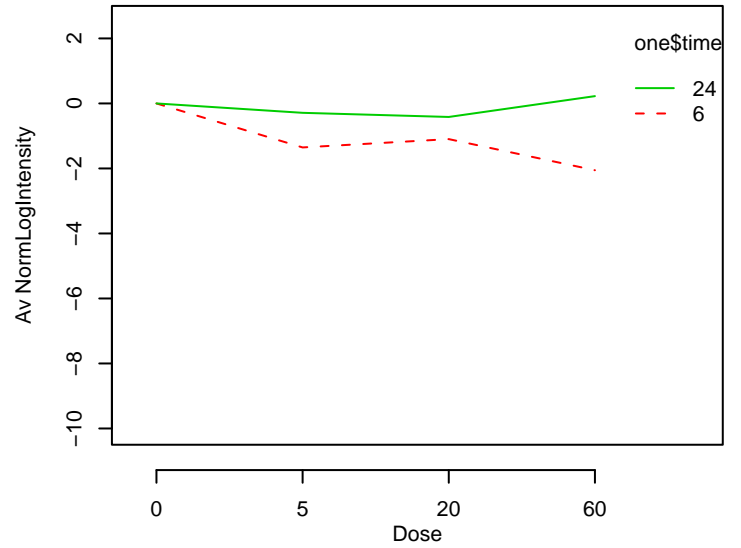

**GO\_0017145 : stem cell division**

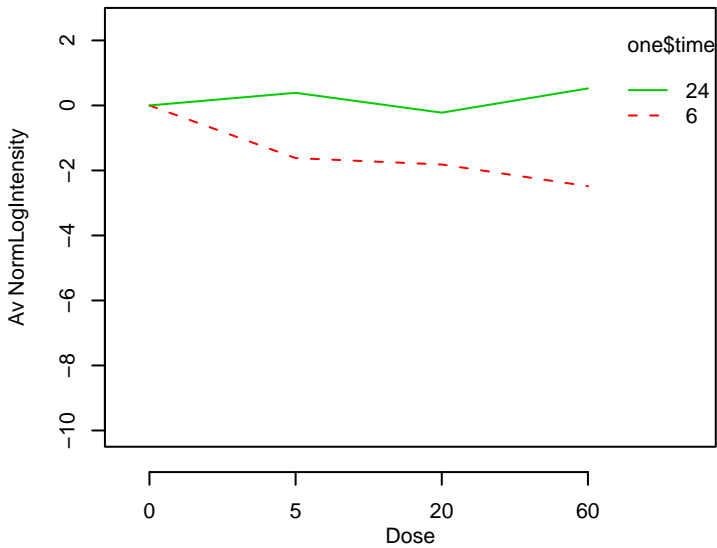

**GO\_0017148 : negative regulation of protein biosynthesis**

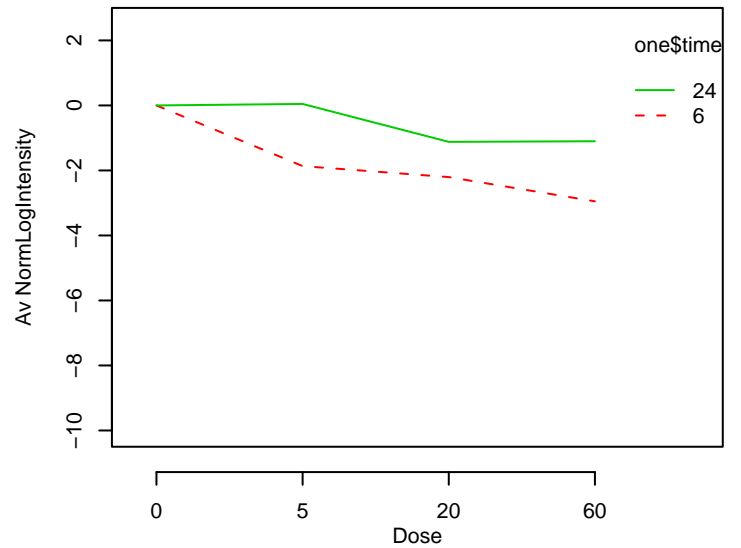

**GO\_0017156 : calcium ion-dependent exocytosis**

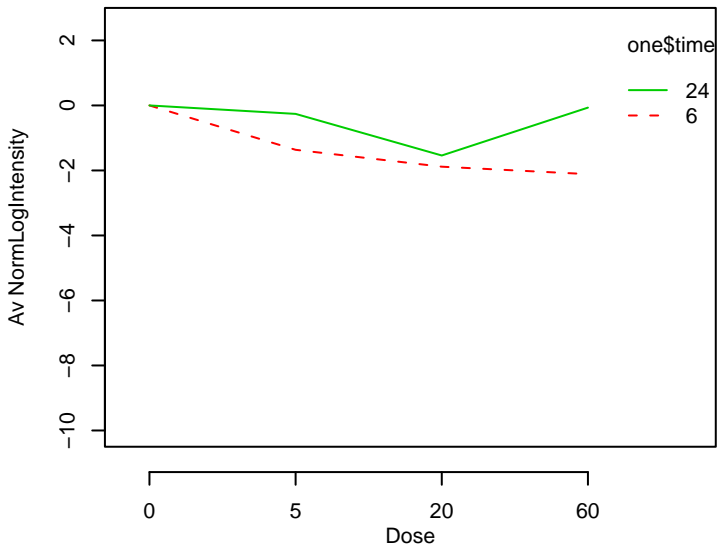

**GO\_0017157 : regulation of exocytosis**

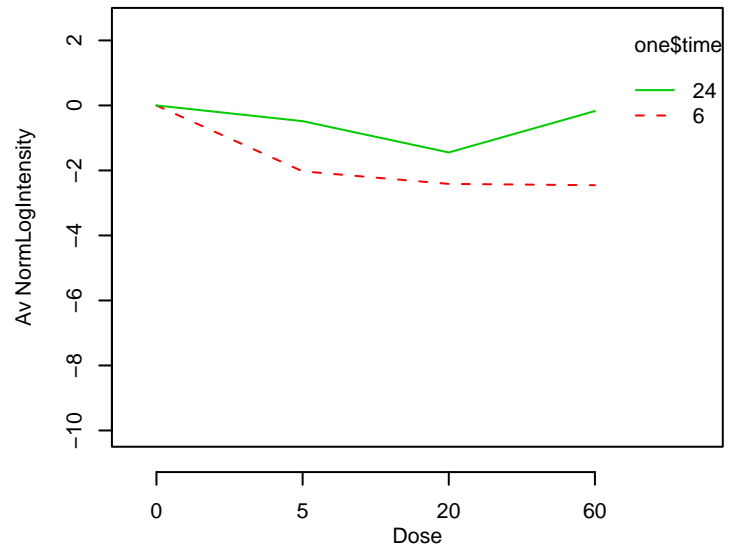

**GO\_0018065 : protein-cofactor linkage**

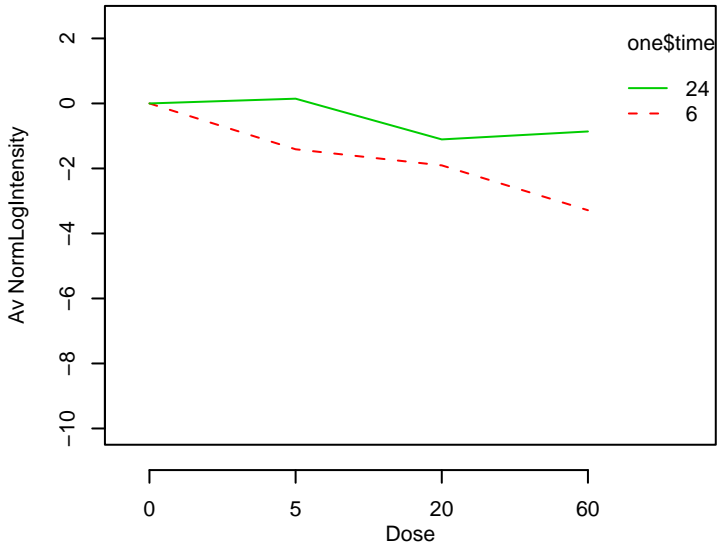

**GO\_0018105 : peptidyl-serine phosphorylation**

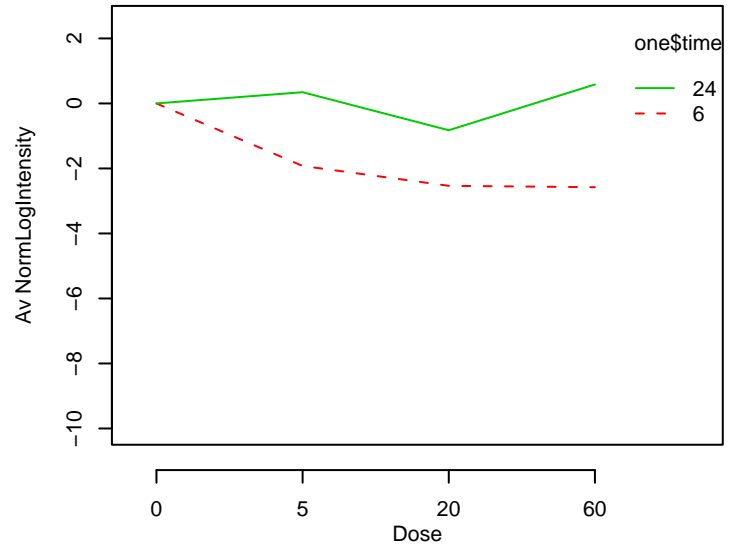

**GO\_0018108 : peptidyl-tyrosine phosphorylation**

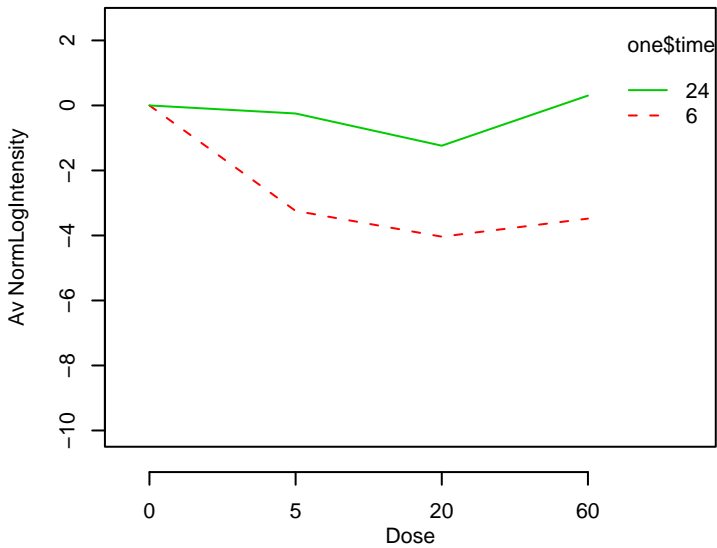

**GO\_0018149 : peptide cross-linking**

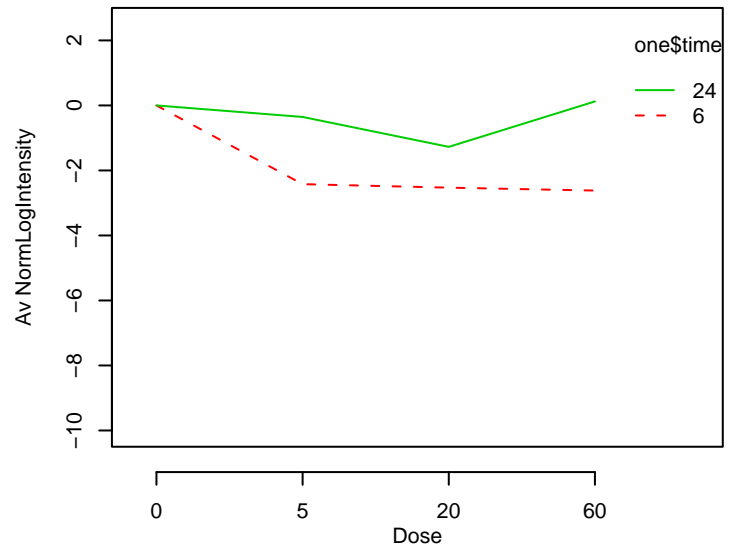

**GO\_0018193 : peptidyl–amino acid modification**

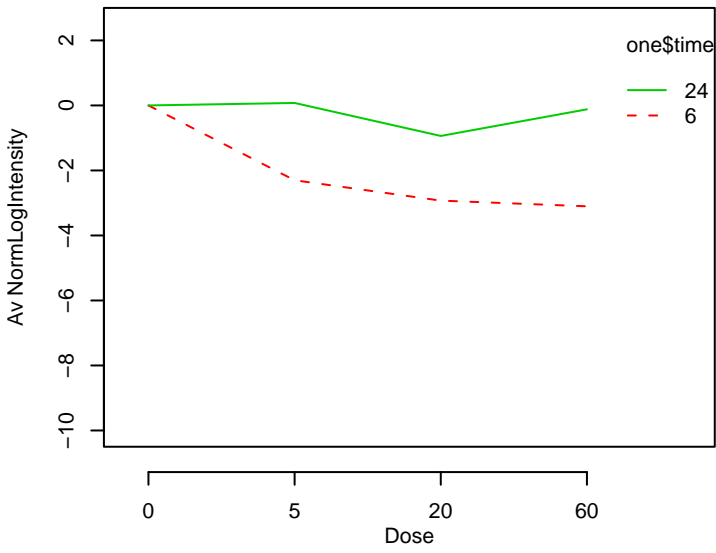

**GO\_0018196 : peptidyl–asparagine modification**

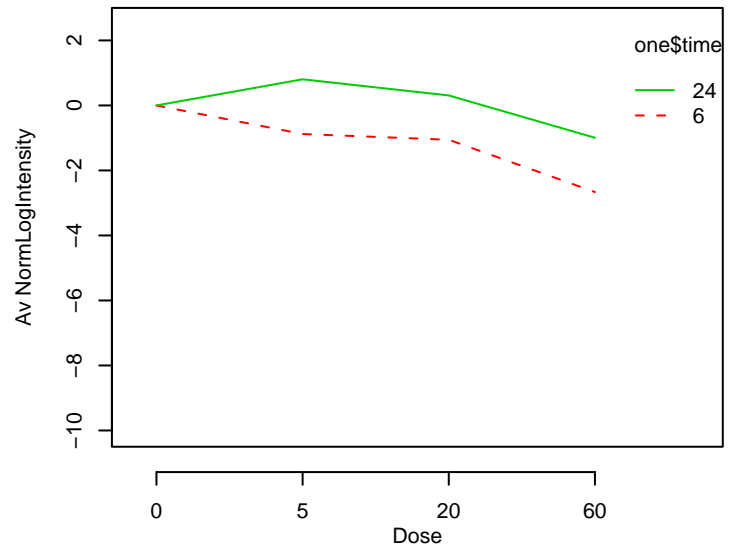

**GO\_0018202 : peptidyl–histidine modification**

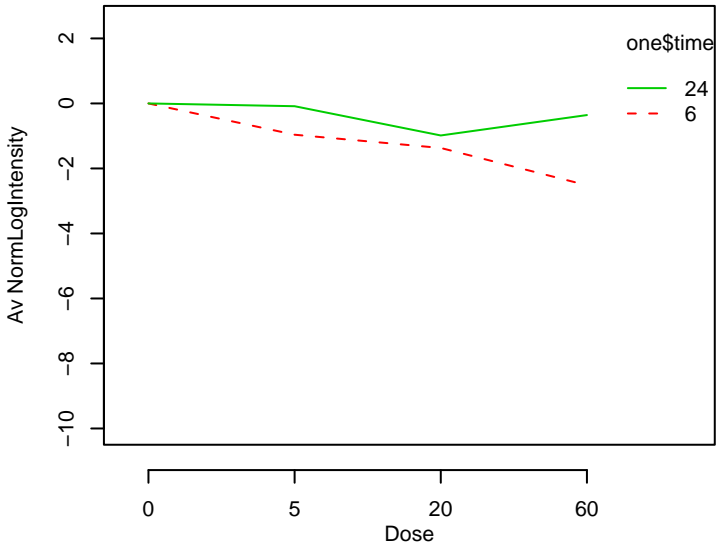

**GO\_0018209 : peptidyl–serine modification**

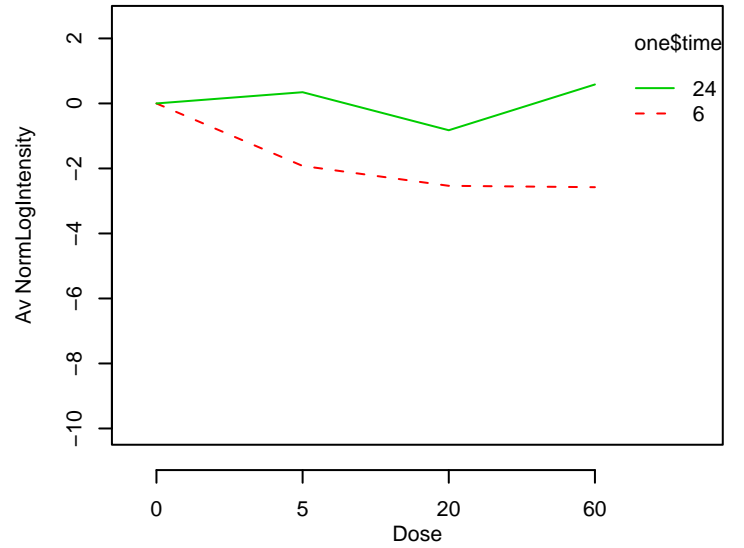

**GO\_0018212 : peptidyl–tyrosine modification**

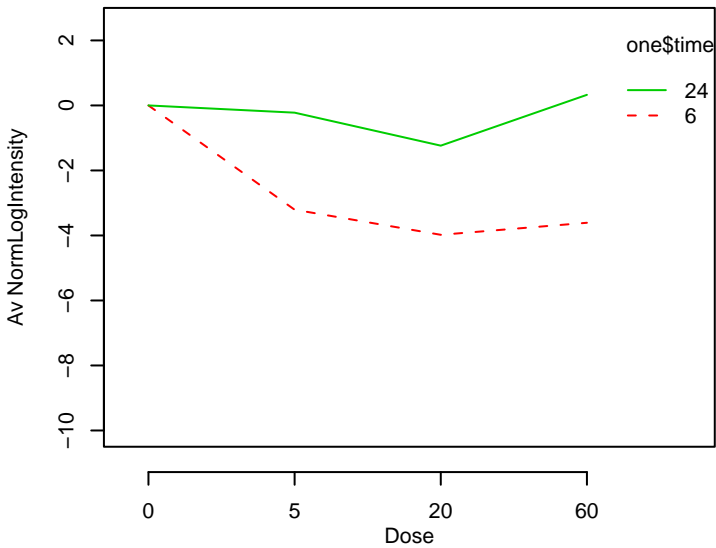

**GO\_0018279 : protein amino acid N–linked glycosylation via :**

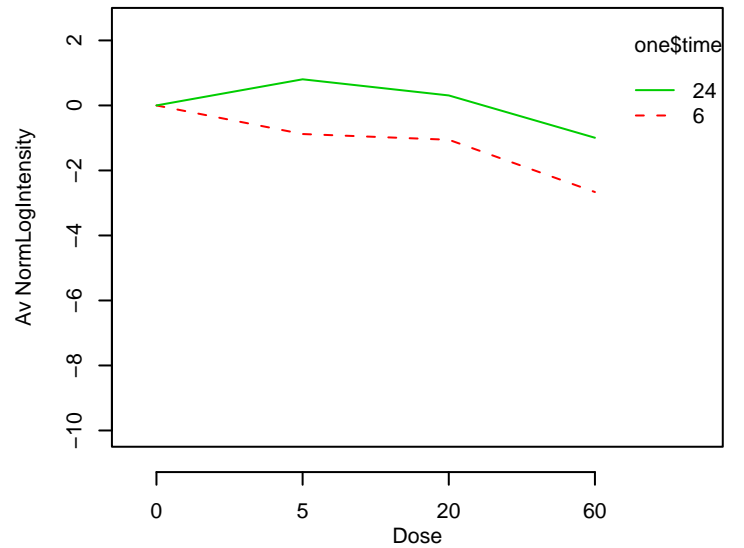

**GO\_0018298 : protein–chromophore linkage**

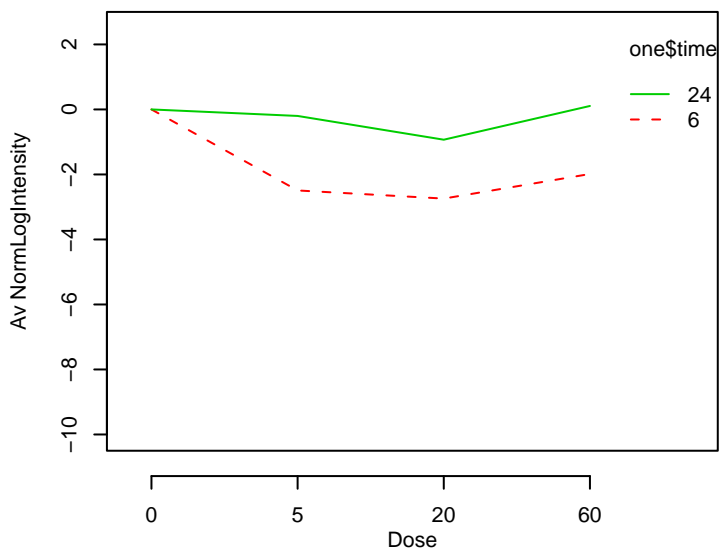

**GO\_0018342 : protein prenylation**

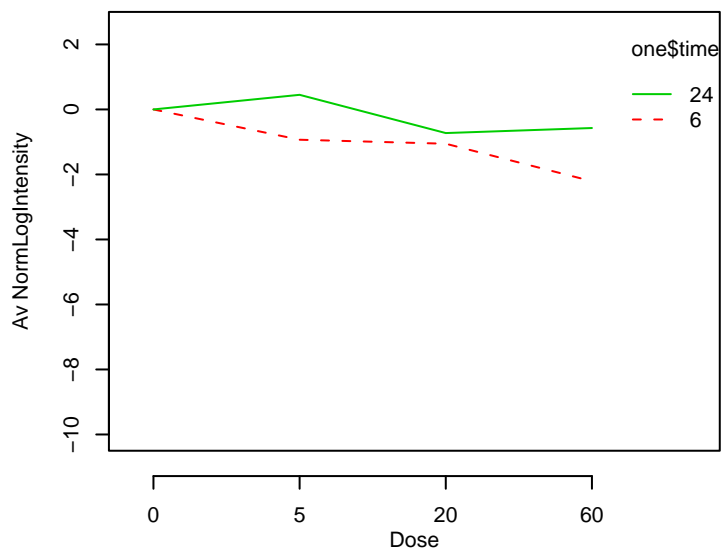

**GO\_0018345 : protein palmitoylation**

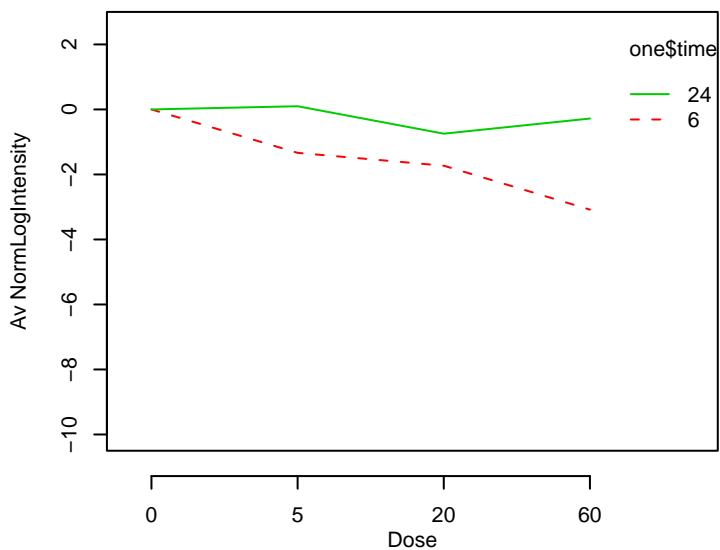

**GO\_0018346 : protein amino acid prenylation**

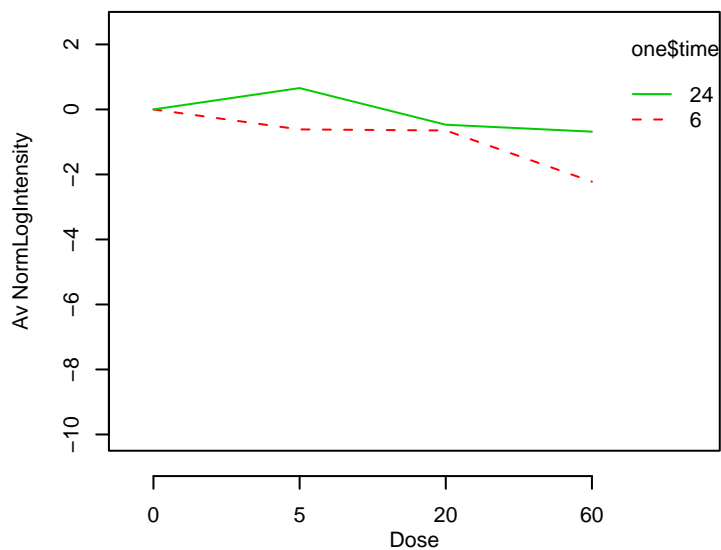

**GO\_0018409 : peptide or protein amino–terminal blocking**

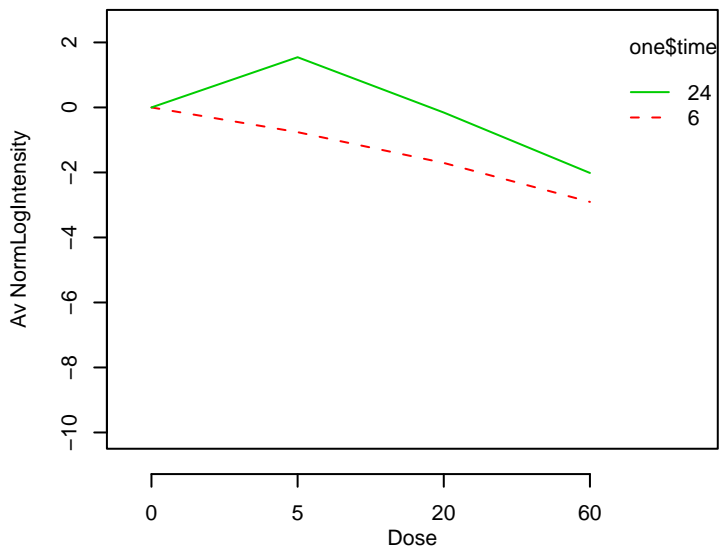

**GO\_0018958 : phenol metabolism**

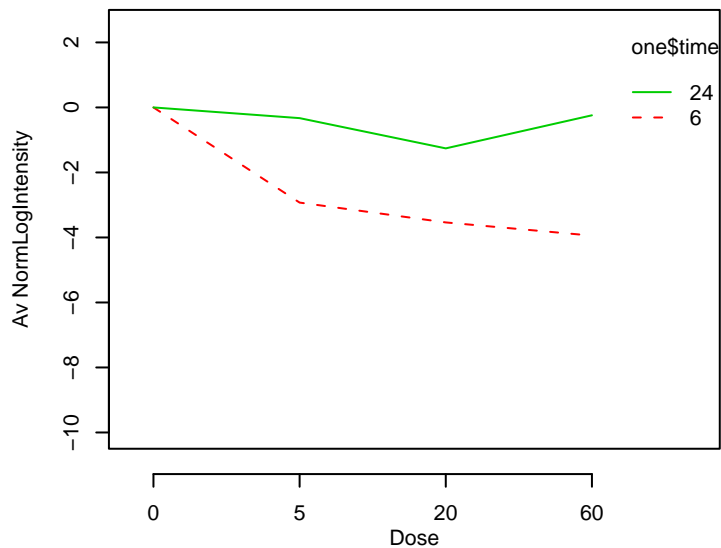

**GO\_0019048 : virus-host interaction**

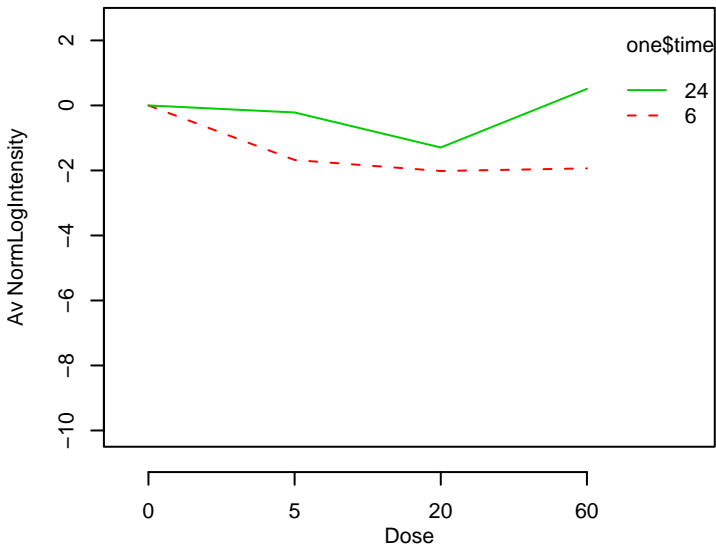

**GO\_0019058 : viral infectious cycle**

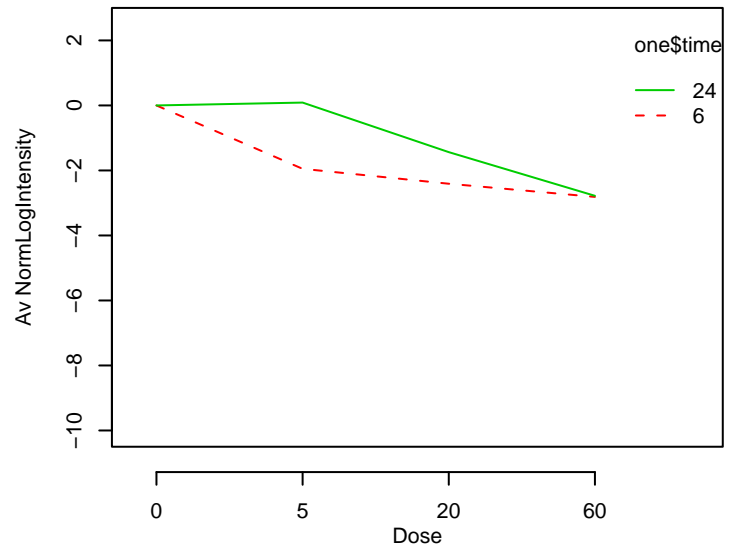

**GO\_0019059 : initiation of viral infection**

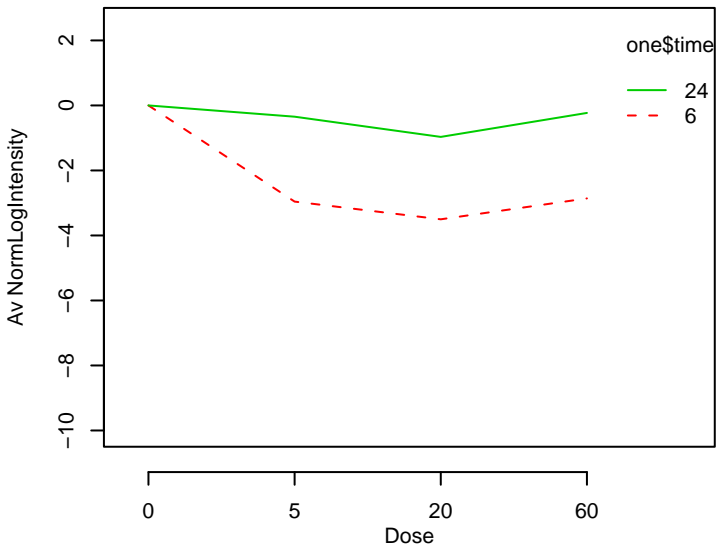

**GO\_0019079 : viral genome replication**

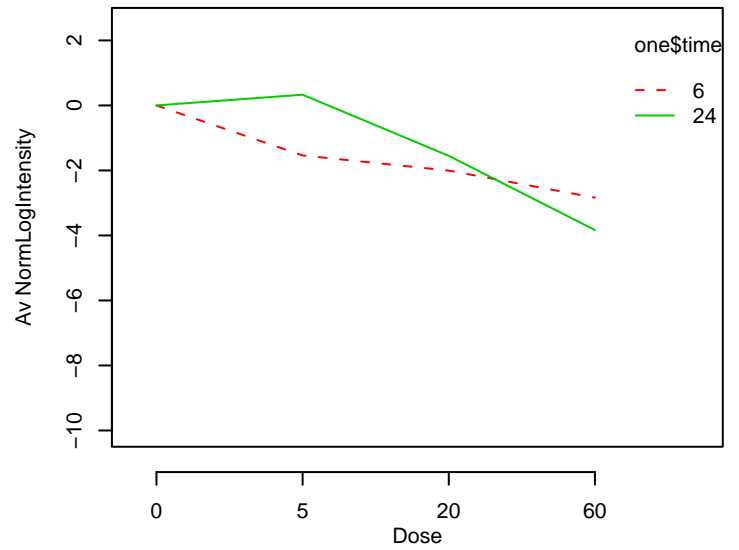

**GO\_0019098 : reproductive behavior**

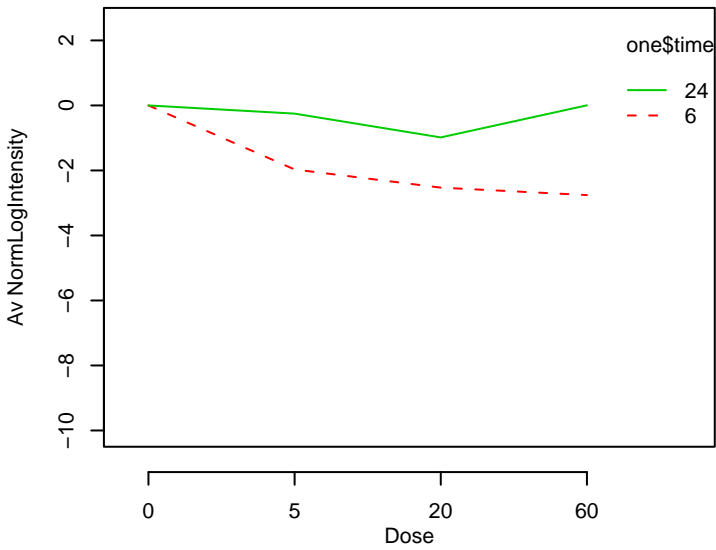

**GO\_0019216 : regulation of lipid metabolism**

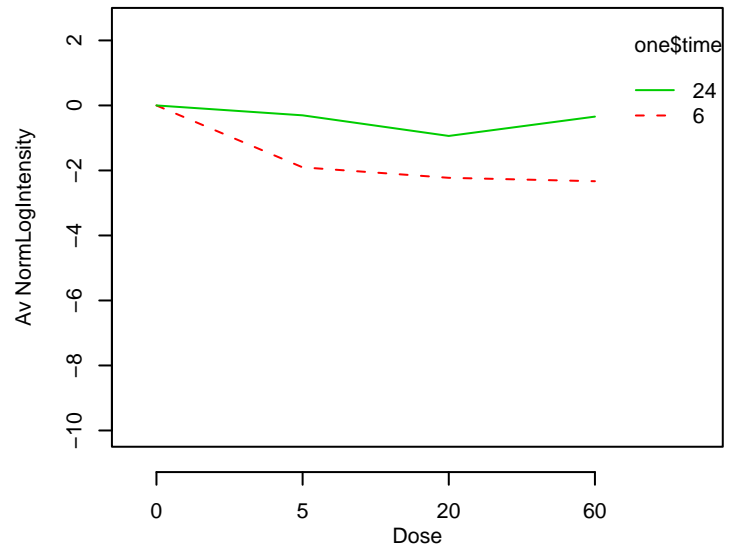

**GO\_0019217 : regulation of fatty acid metabolism**

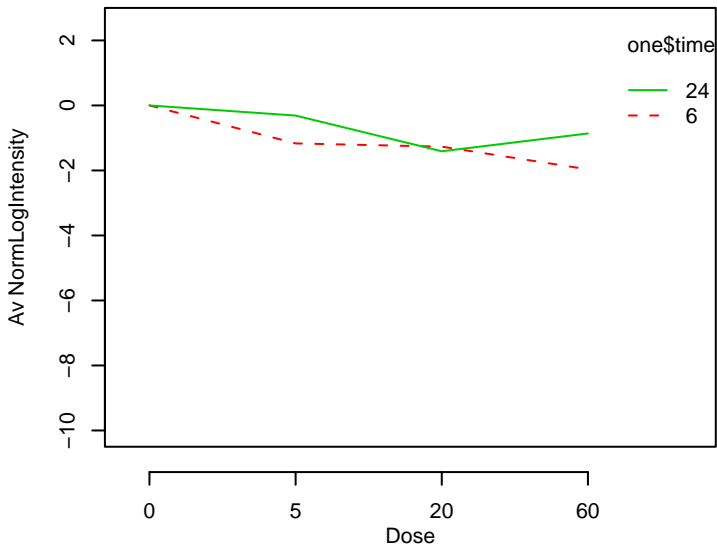

**GO\_0019218 : regulation of steroid metabolism**

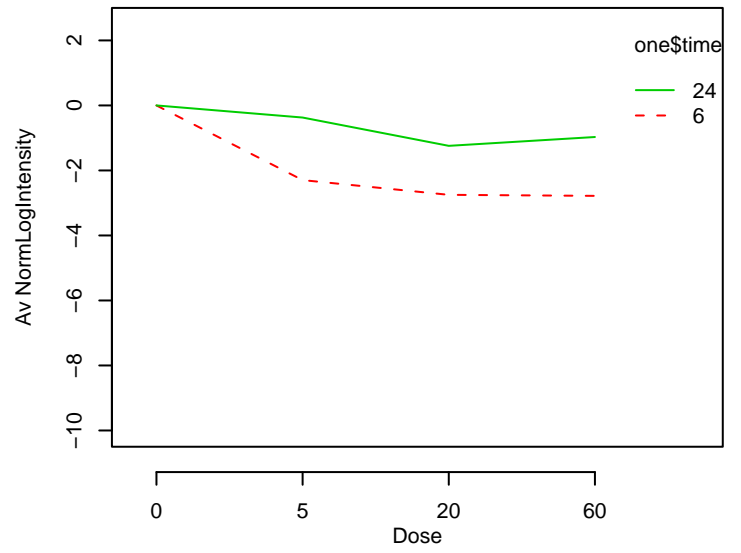

**GO\_0019220 : regulation of phosphate metabolism**

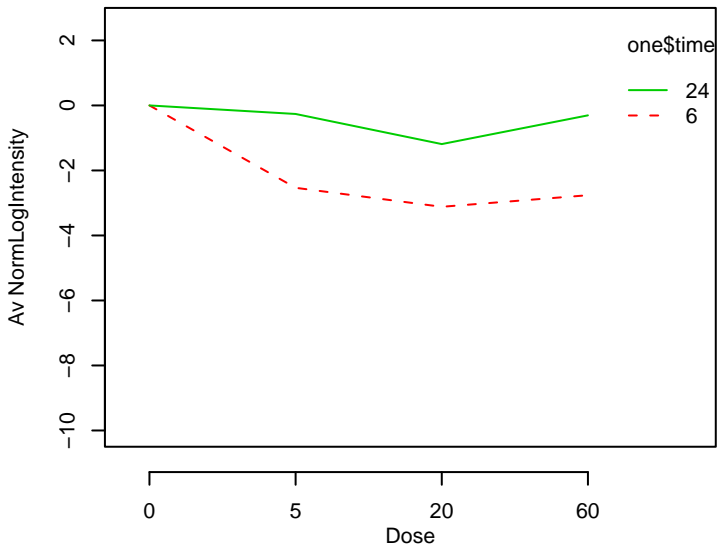

**O\_0019221 : cytokine and chemokine mediated signaling pat**

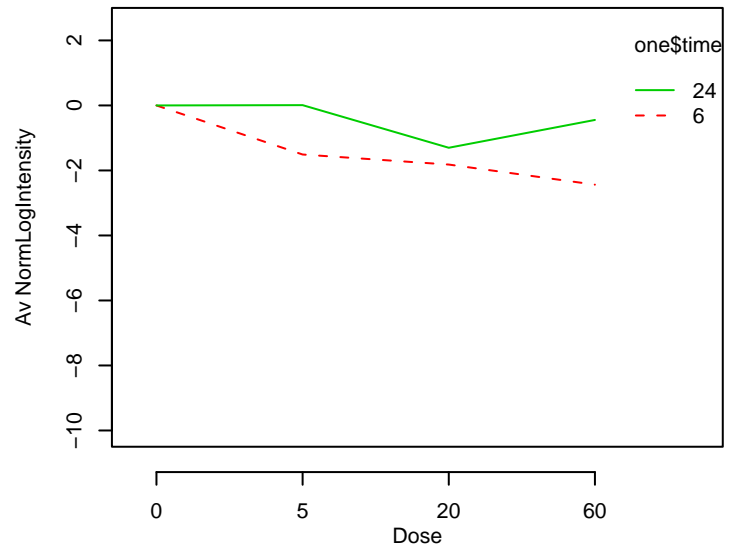

**GO\_0019229 : regulation of vasoconstriction**

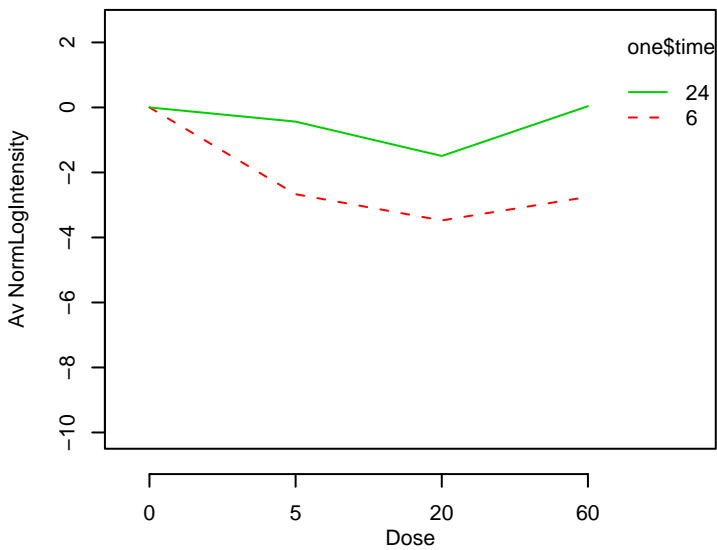

**GO\_0019233 : sensory perception of pain**

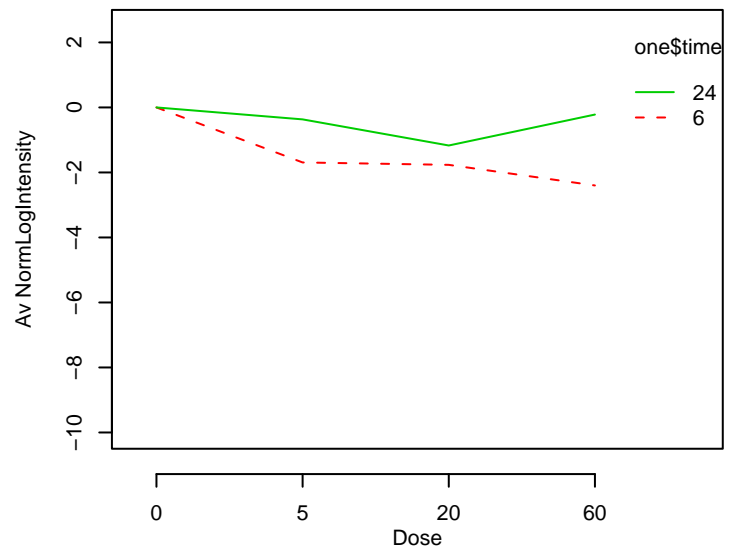



**GO\_0019317 : fucose catabolism**

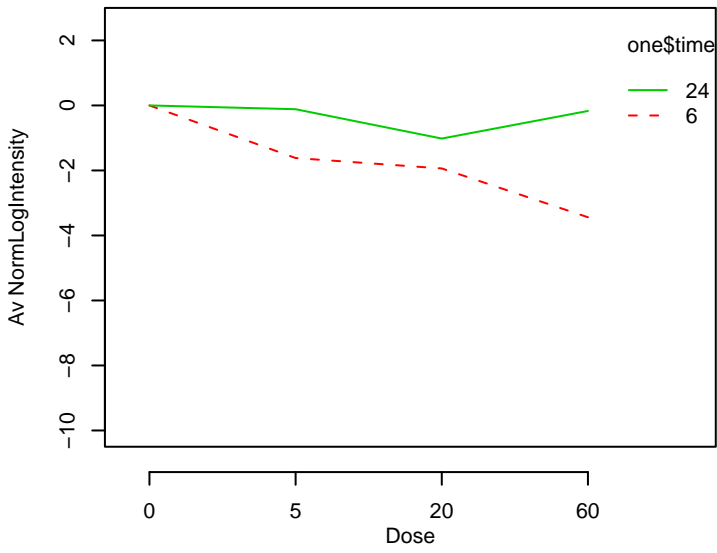

**GO\_0019318 : hexose metabolism**

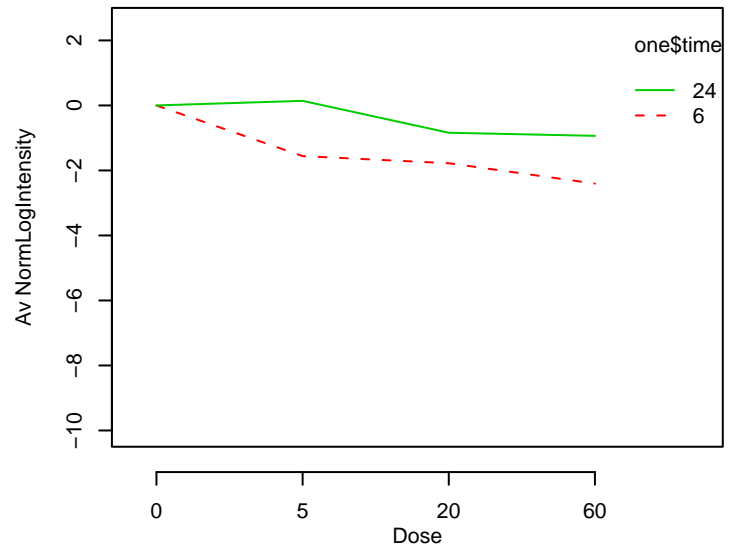

**GO\_0019319 : hexose biosynthesis**

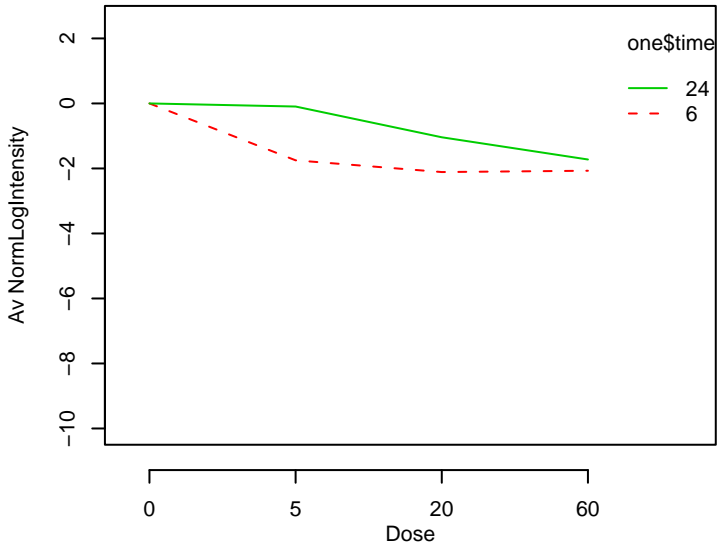

**GO\_0019320 : hexose catabolism**

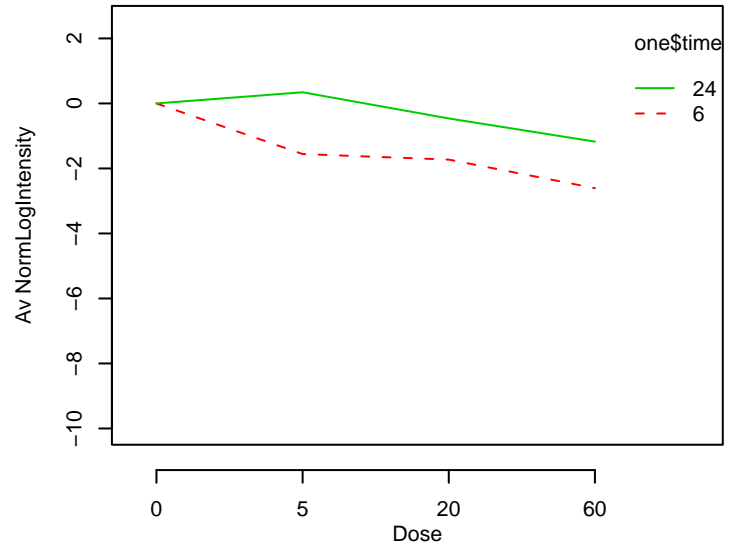

**GO\_0019362 : pyridine nucleotide metabolism**

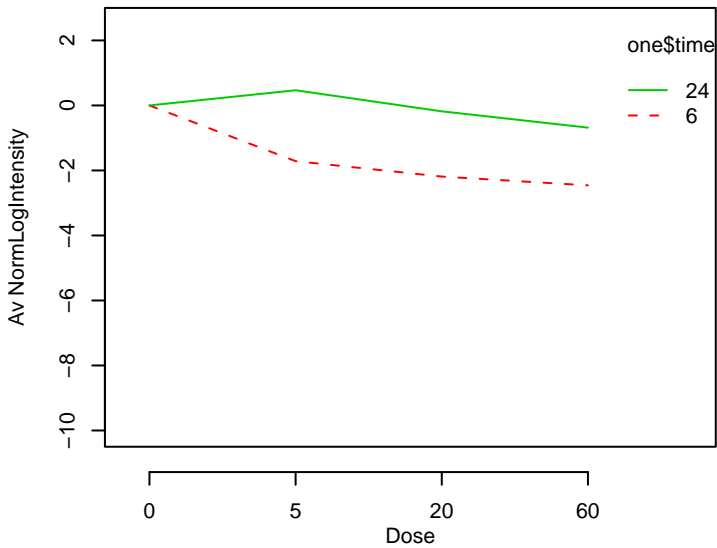

**GO\_0019363 : pyridine nucleotide biosynthesis**

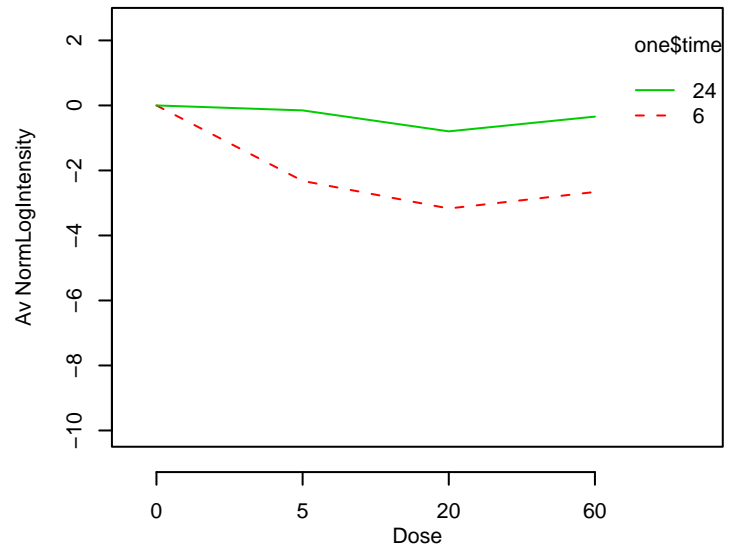

**GO\_0019369 : arachidonic acid metabolism**

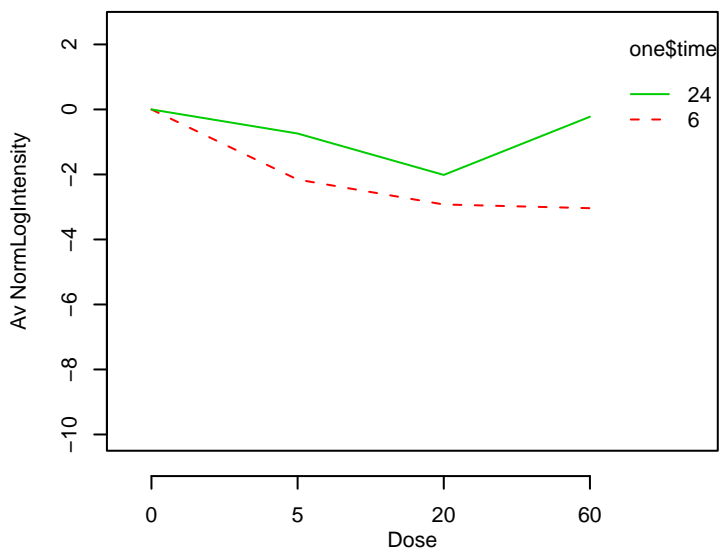

**GO\_0019370 : leukotriene biosynthesis**

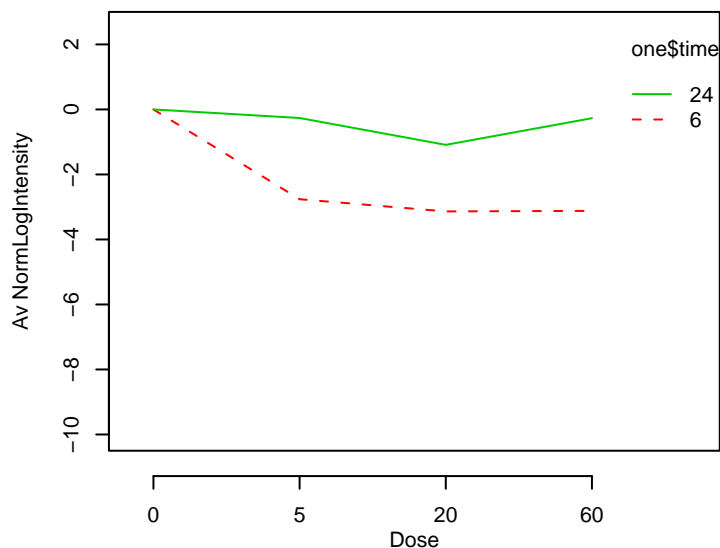

**GO\_0019377 : glycolipid catabolism**

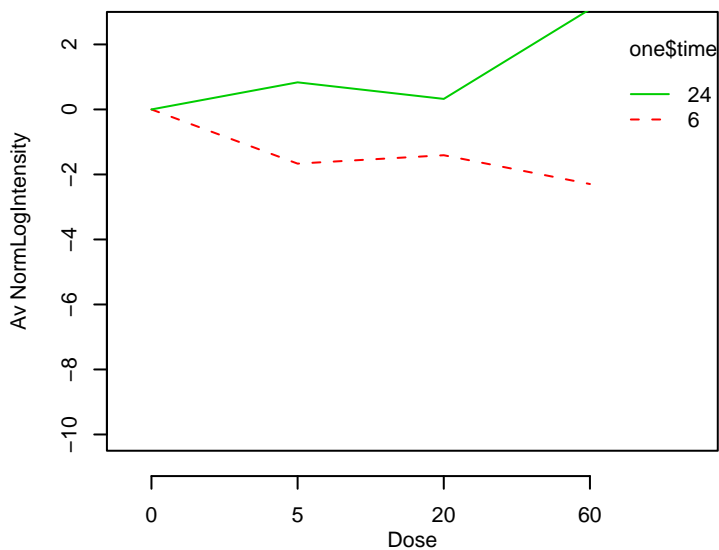

**GO\_0019395 : fatty acid oxidation**

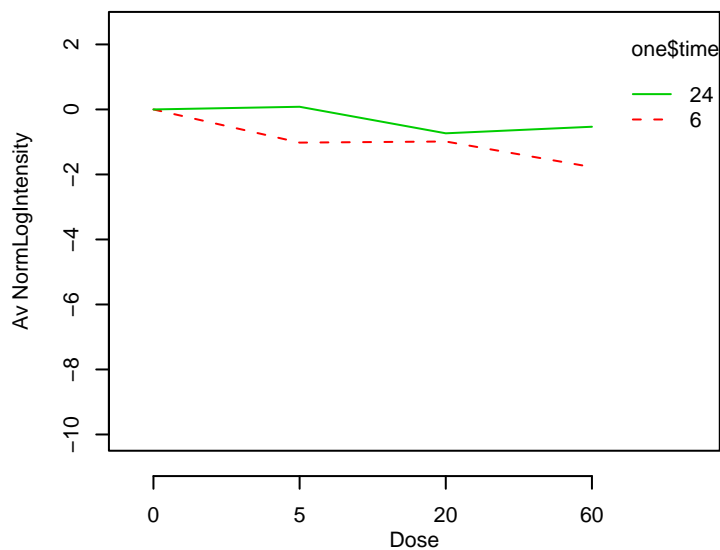

**GO\_0019438 : aromatic compound biosynthesis**

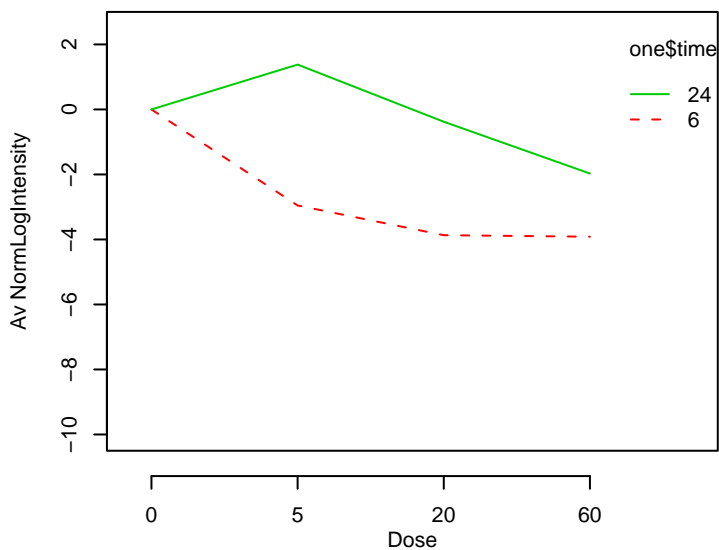

**GO\_0019439 : aromatic compound catabolism**

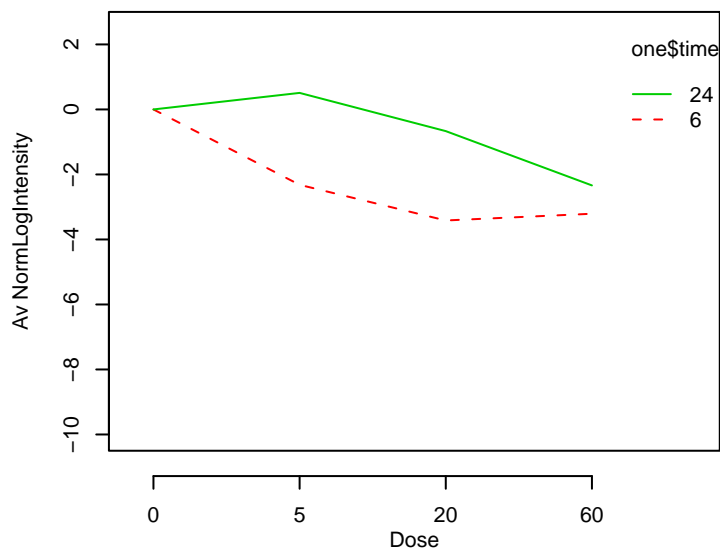

**GO\_0019627 : urea metabolism**

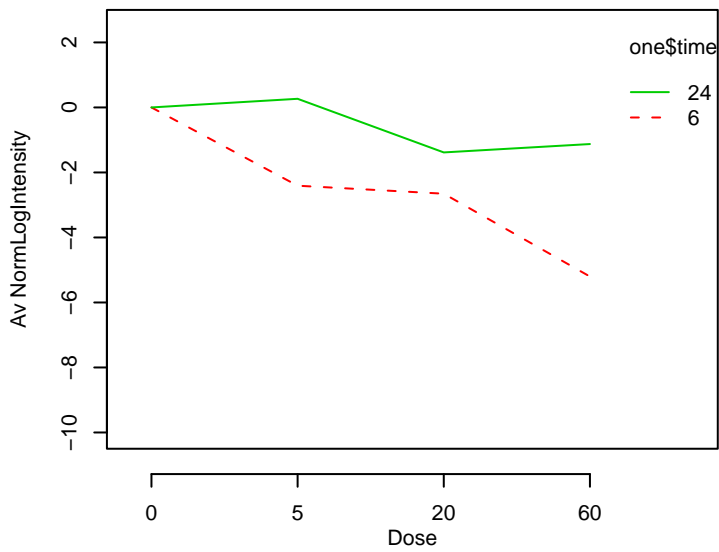

**GO\_0019642 : anaerobic glycolysis**

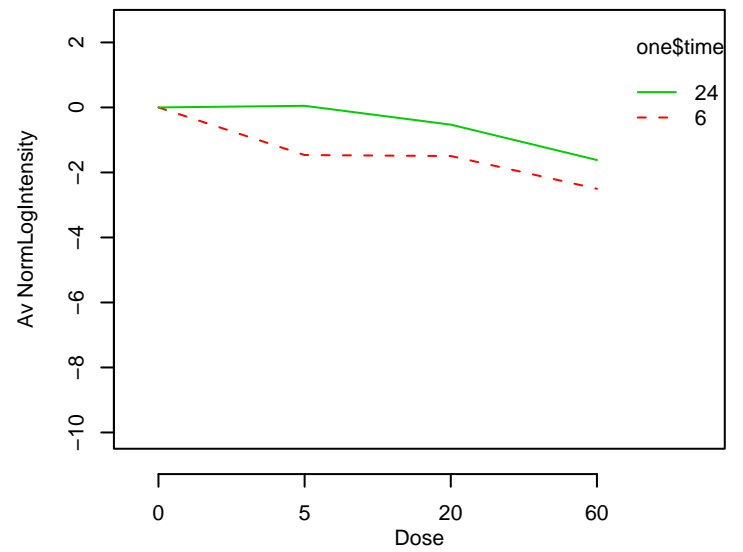

**GO\_0019674 : NAD metabolism**

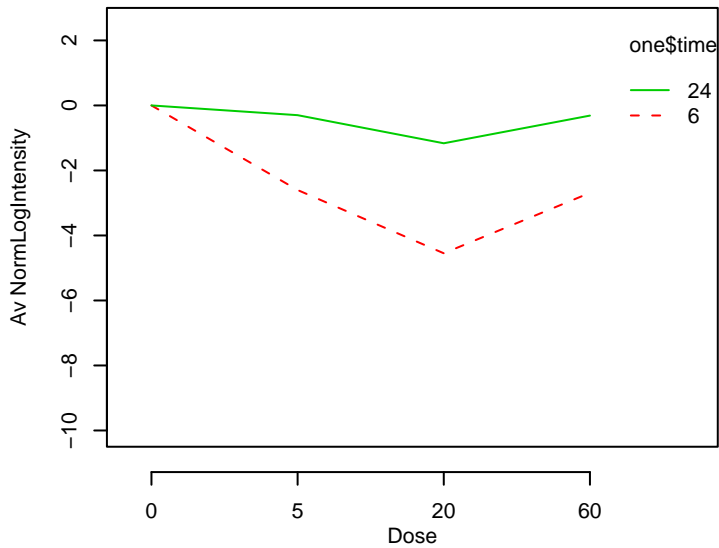

**GO\_0019720 : Mo-molybdopterin cofactor metabolism**

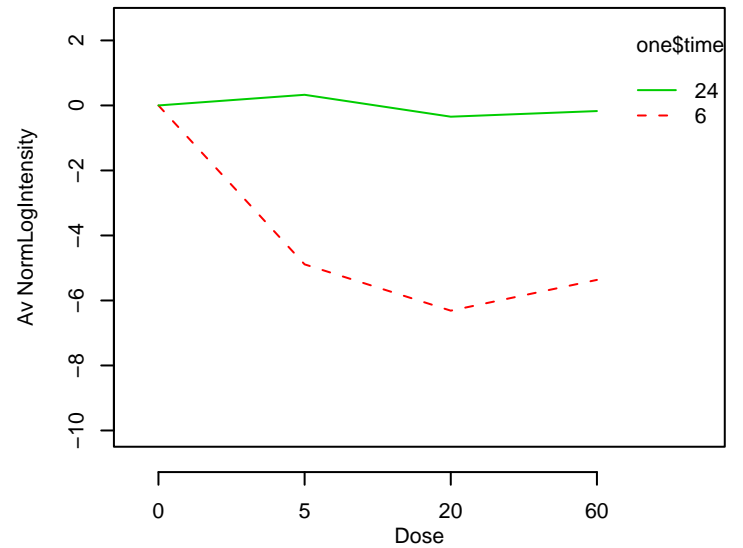

**GO\_0019722 : calcium-mediated signaling**

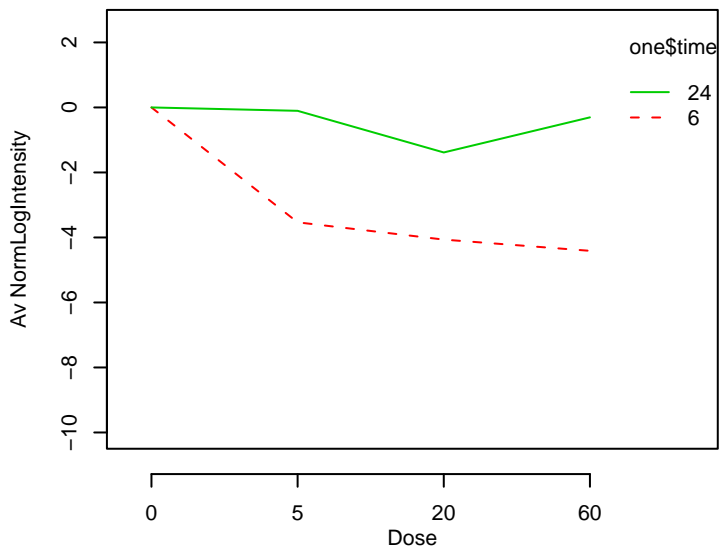

**GO\_0019724 : B cell mediated immunity**

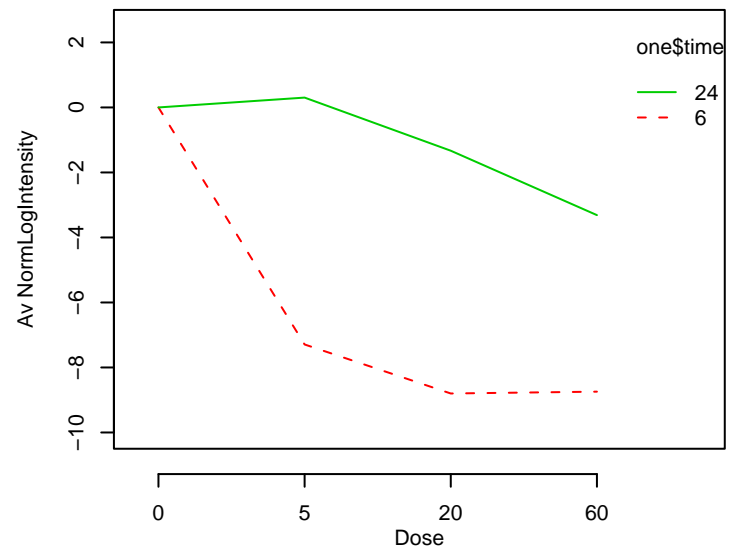

**GO\_0019725 : cell homeostasis**

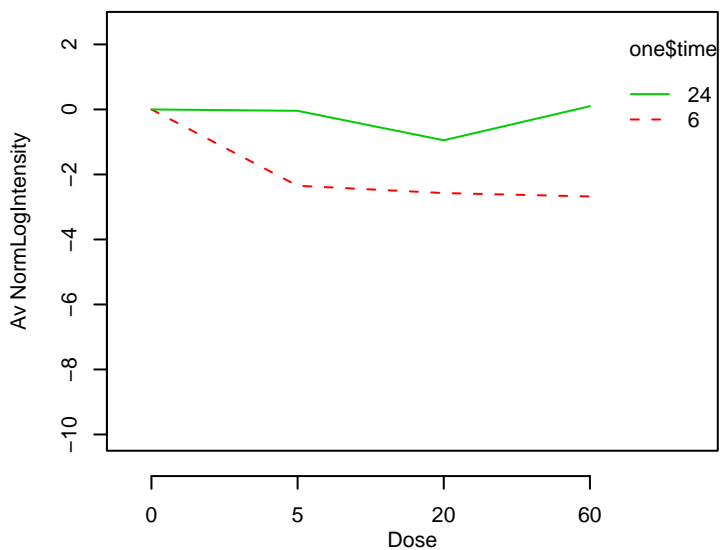

**GO\_0019730 : antimicrobial humoral response**

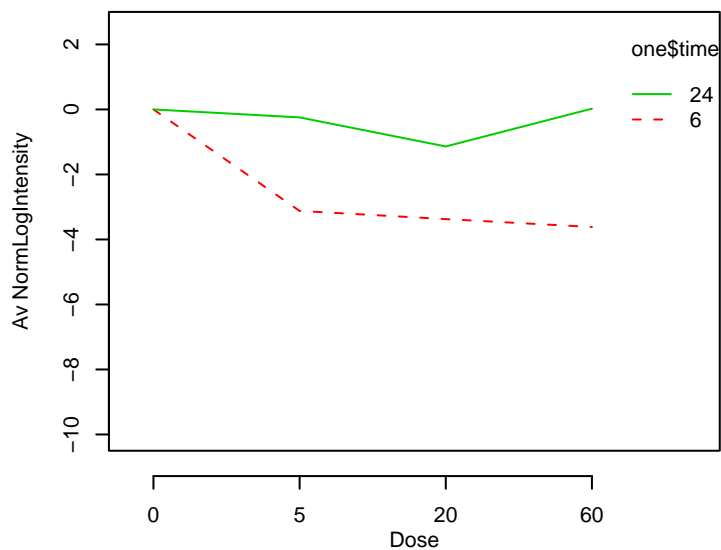

**GO\_0019731 : antibacterial humoral response**

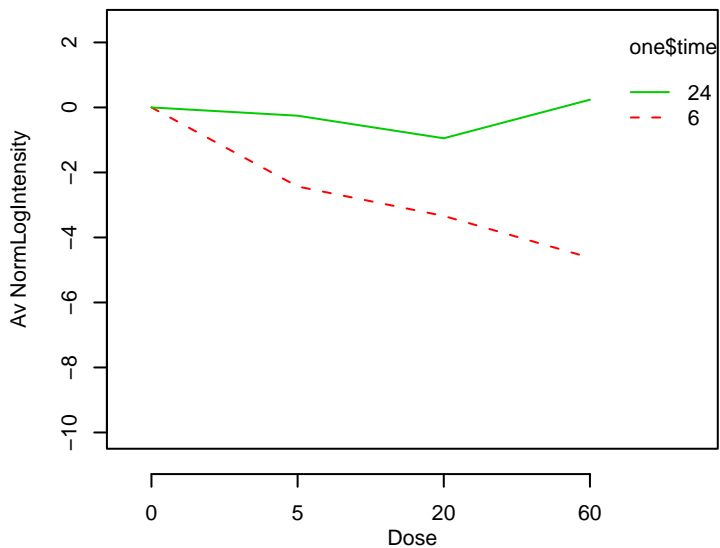

**GO\_0019735 : antimicrobial humoral response (sensu Vertebrata)**

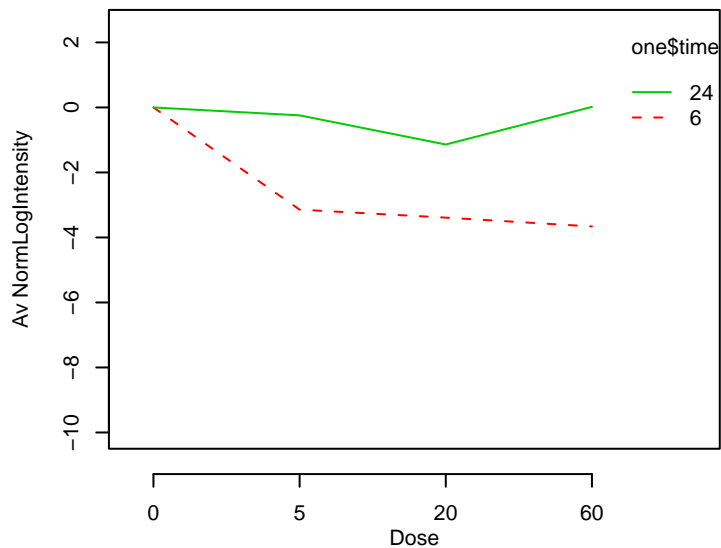

**GO\_0019748 : secondary metabolism**

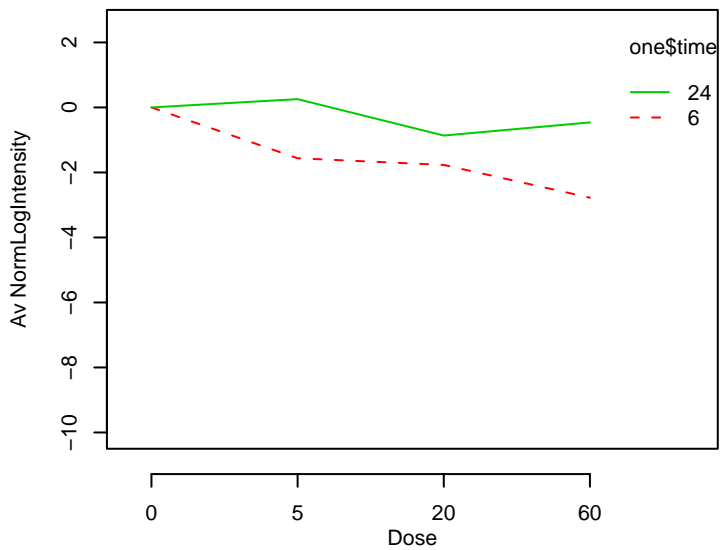

**GO\_0019751 : polyol metabolism**

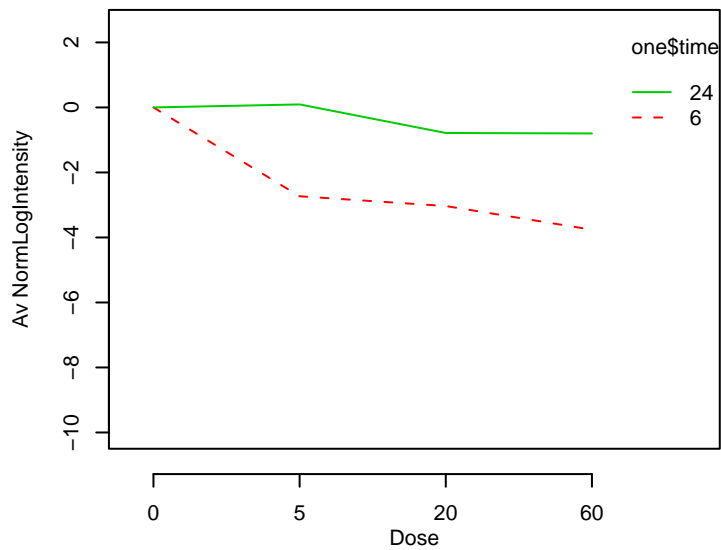

**GO\_0019827 : stem cell maintenance**

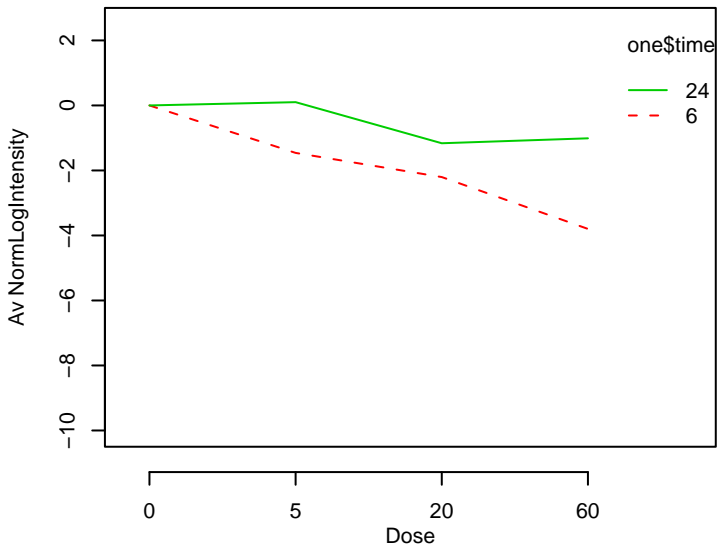

**GO\_0019835 : cytolysis**

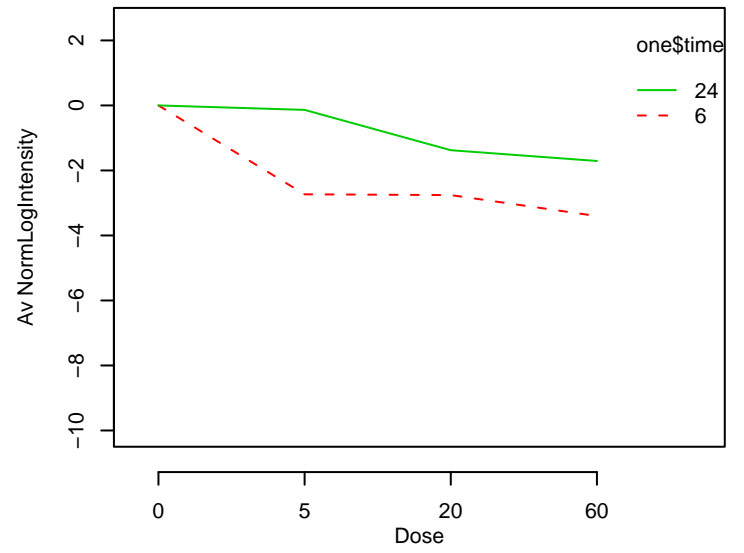

**GO\_0019856 : pyrimidine base biosynthesis**

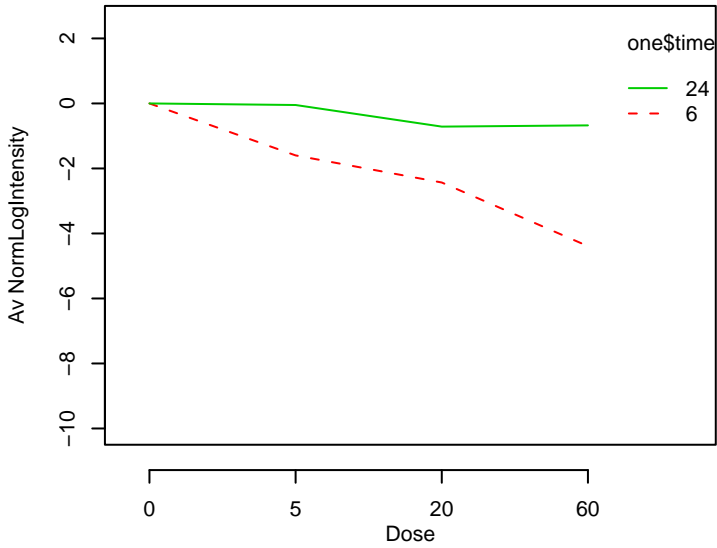

**GO\_0019882 : antigen processing and presentation**

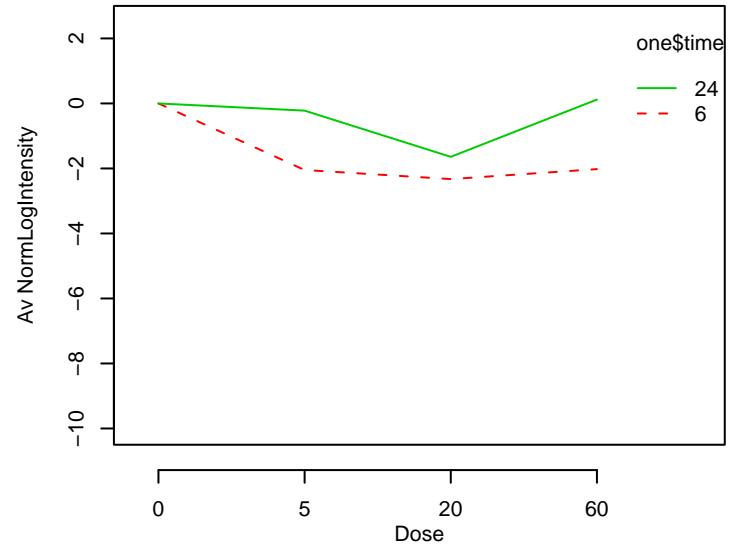

**GO\_0019884 : antigen processing and presentation of exogen**

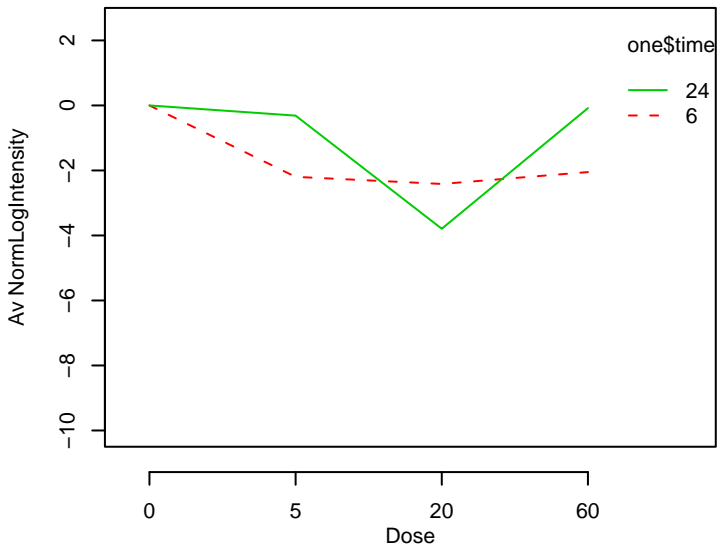

**GO\_0019915 : sequestering of lipid**

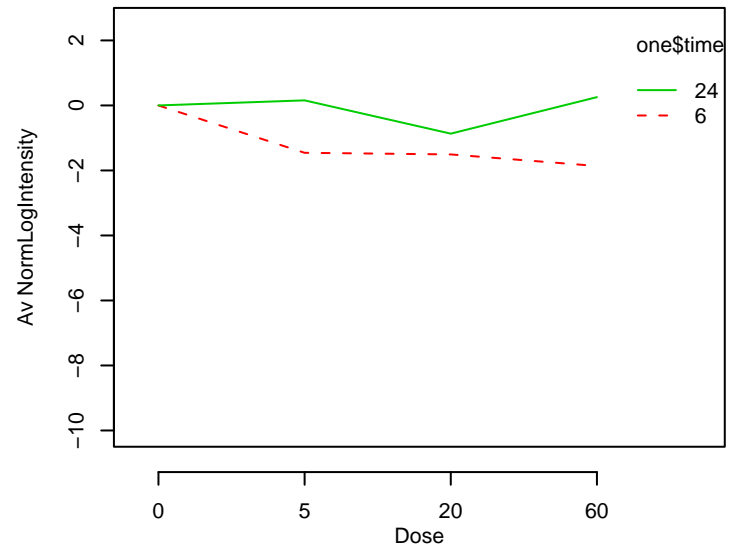

**GO\_0019932 : second-messenger-mediated signaling**

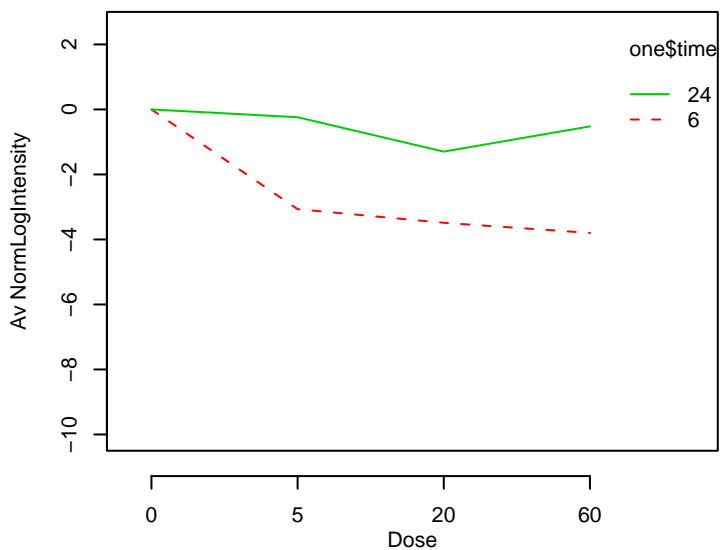

**GO\_0019933 : cAMP-mediated signaling**

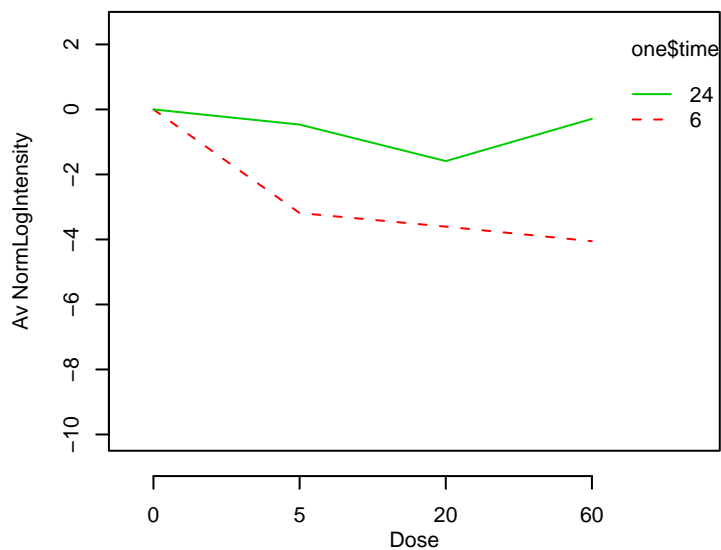

**GO\_0019935 : cyclic-nucleotide-mediated signaling**

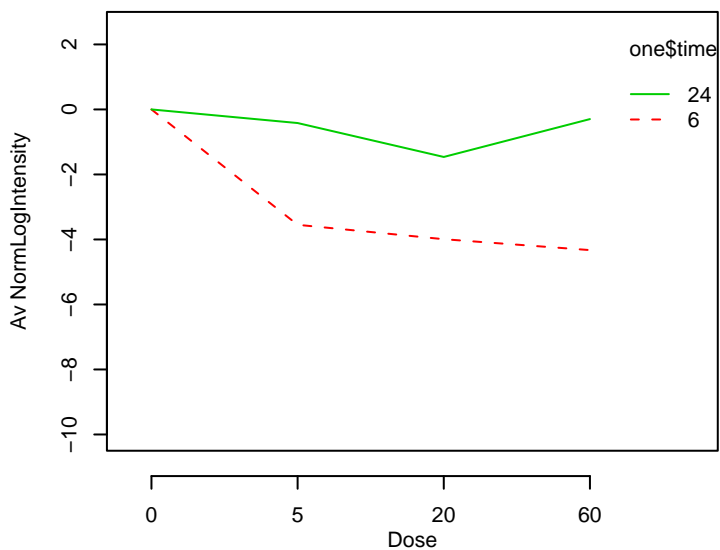

**GO\_0019941 : modification-dependent protein catabolism**

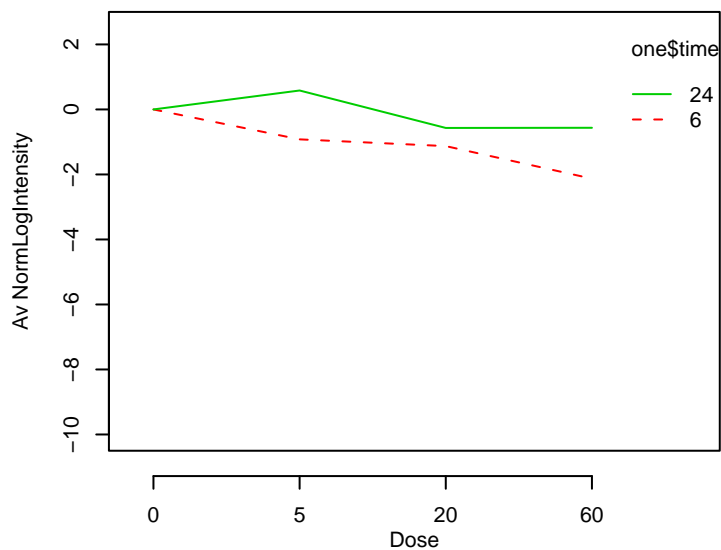

**GO\_0020027 : hemoglobin metabolism**

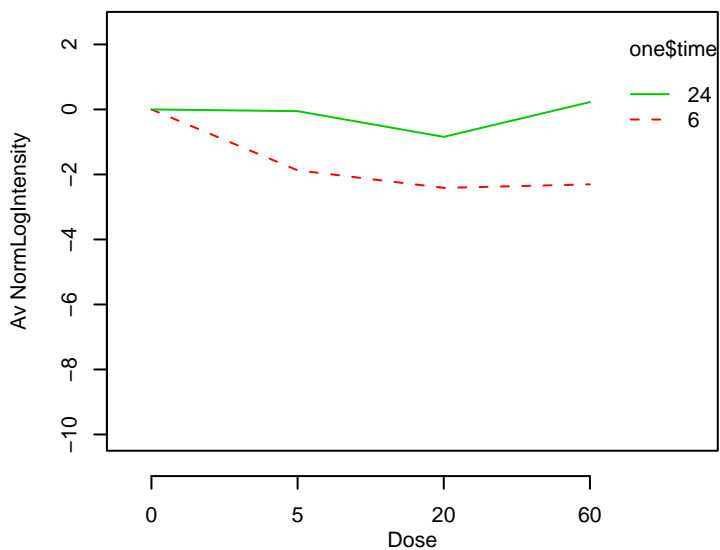

**GO\_0021782 : glial cell development**

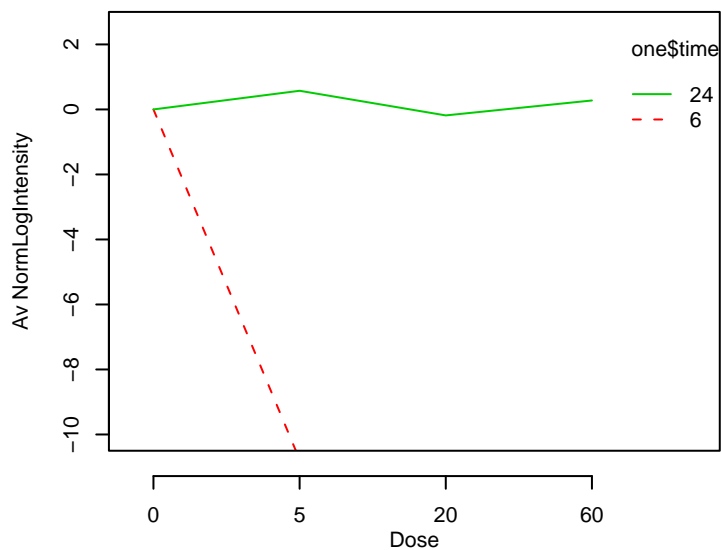

**GO\_0021915 : neural tube development**

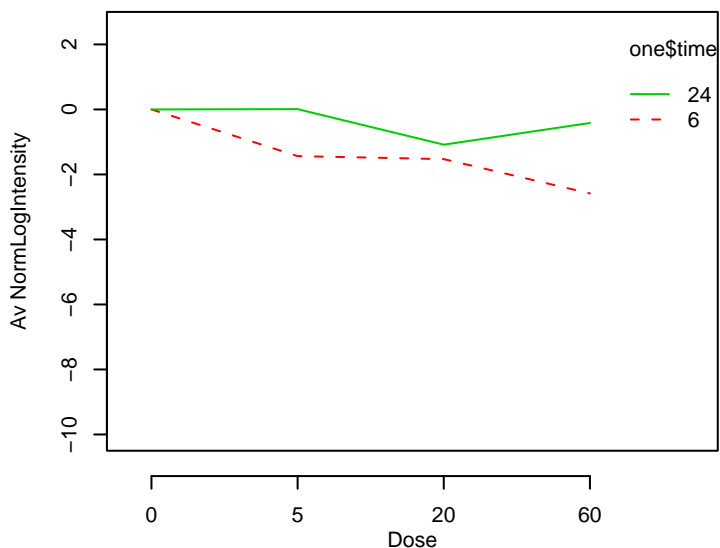

**GO\_0030003 : cation homeostasis**

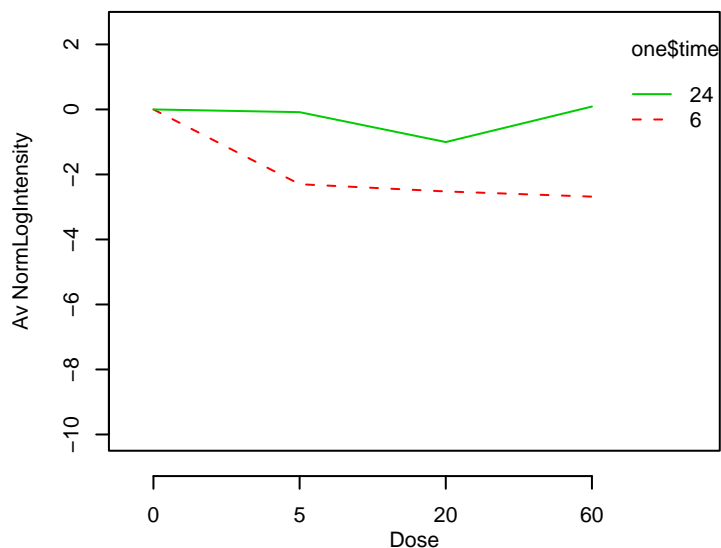

**GO\_0030004 : monovalent inorganic cation homeostasis**

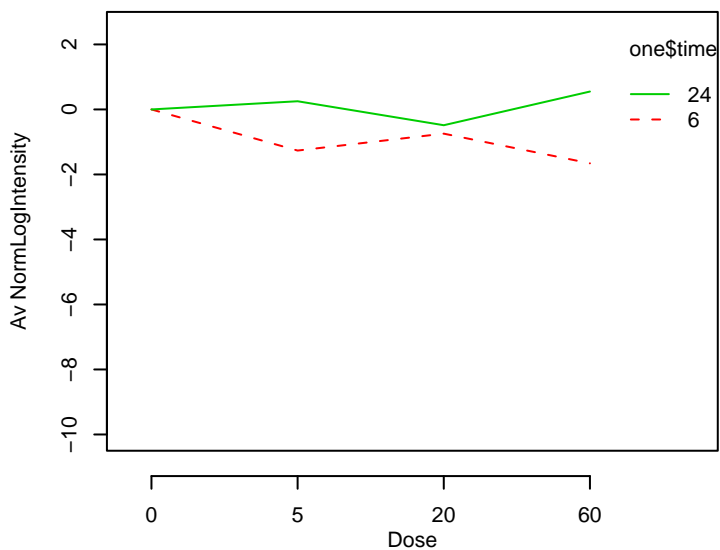

**GO\_0030005 : di-, tri-valent inorganic cation homeostasi**

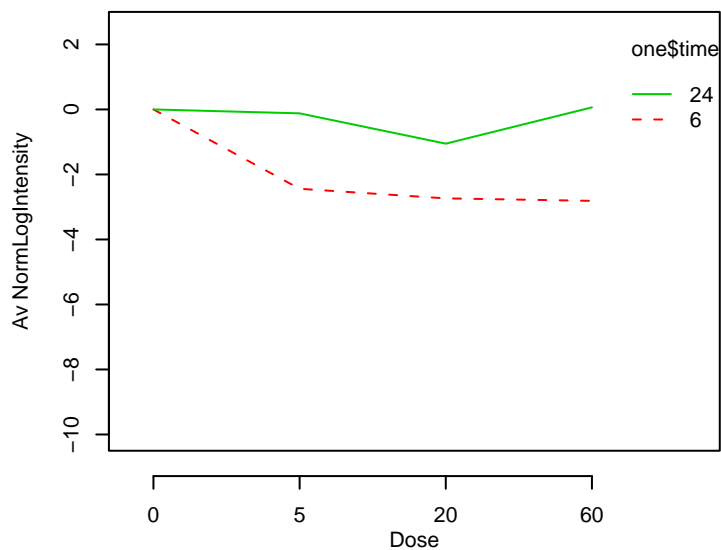

**GO\_0030010 : establishment of cell polarity**

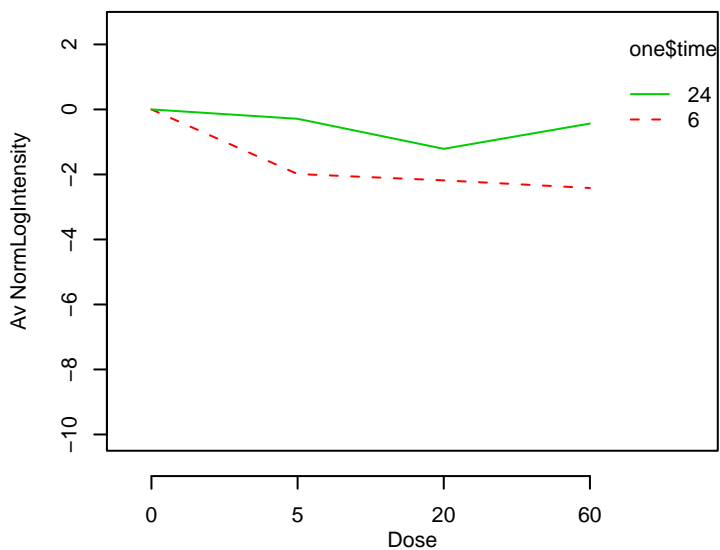

**GO\_0030029 : actin filament-based process**

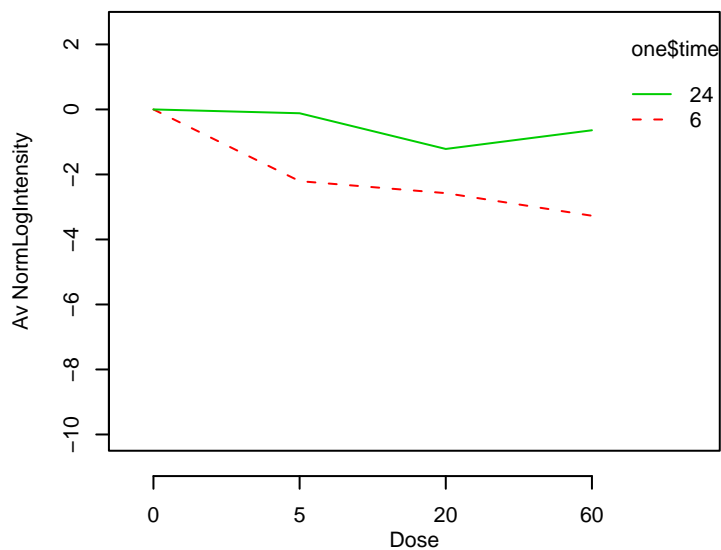

**GO\_0030030 : cell projection organization and biogenesis**

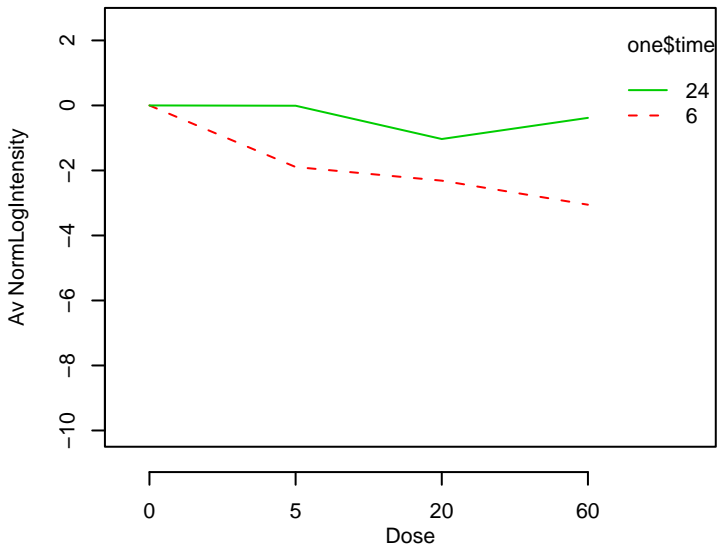

**GO\_0030031 : cell projection biogenesis**

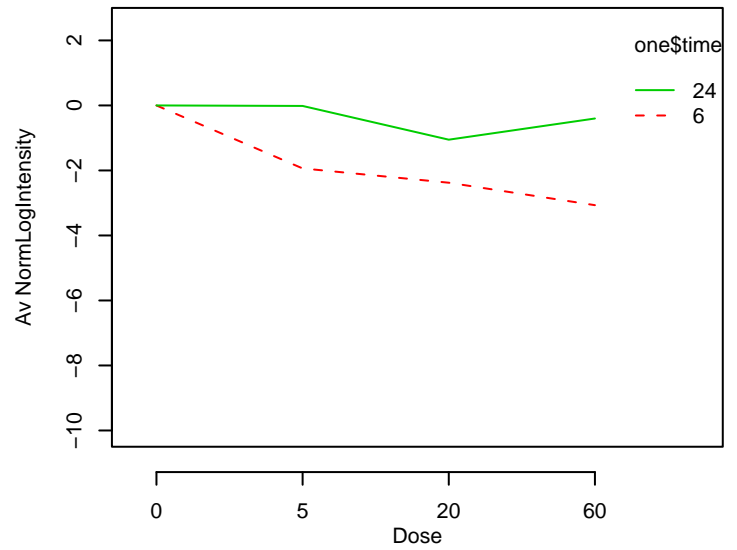

**GO\_0030032 : lamellipodium biogenesis**

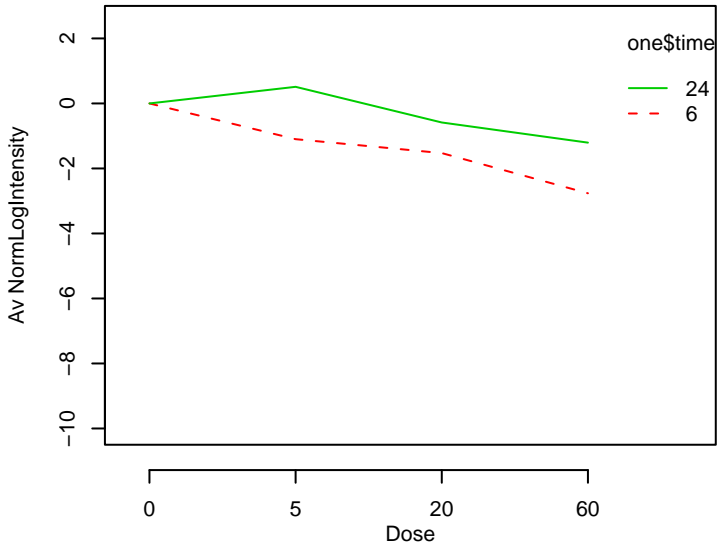

**GO\_0030035 : microspike biogenesis**

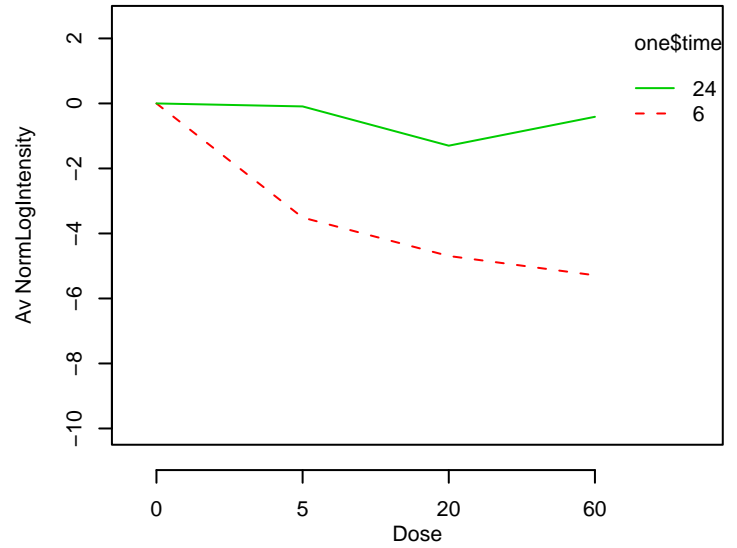

**GO\_0030036 : actin cytoskeleton organization and biogene:**

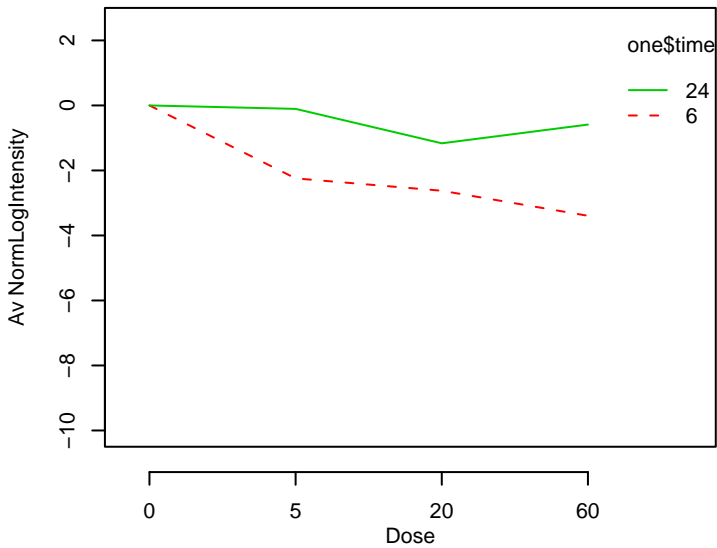

**GO\_0030041 : actin filament polymerization**

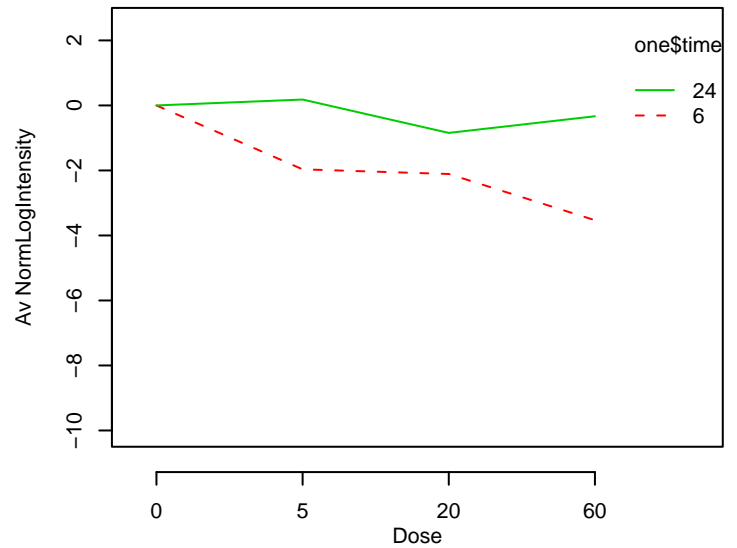



**GO\_0030042 : actin filament depolymerization**

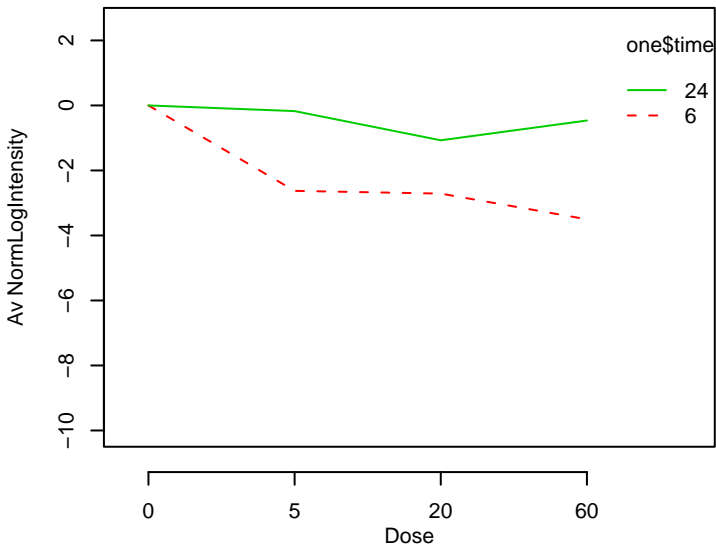

**GO\_0030048 : actin filament-based movement**

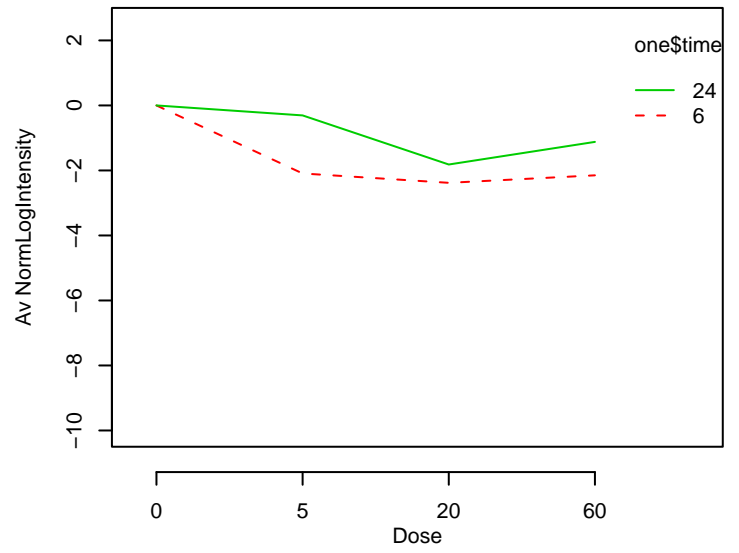

**GO\_0030071 : regulation of mitotic metaphase/anaphase tran**

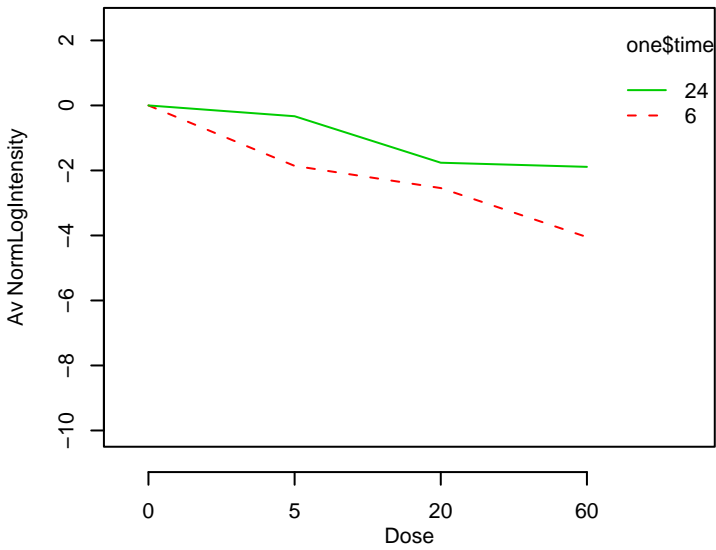

**GO\_0030072 : peptide hormone secretion**

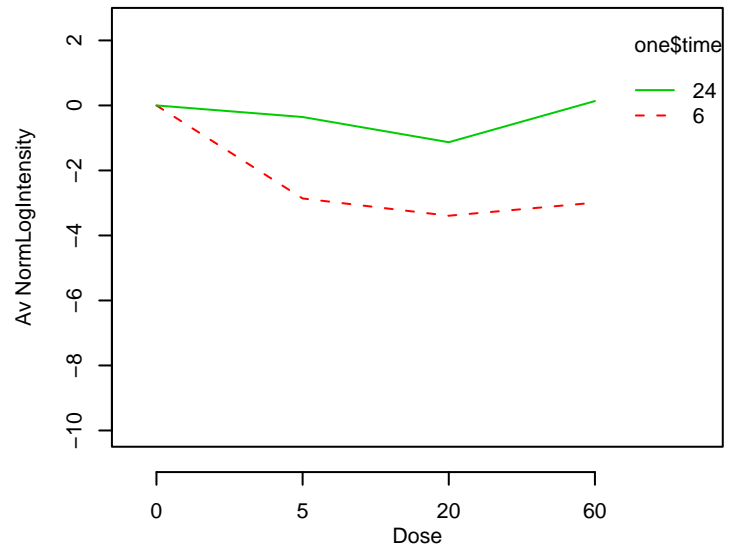

**GO\_0030073 : insulin secretion**

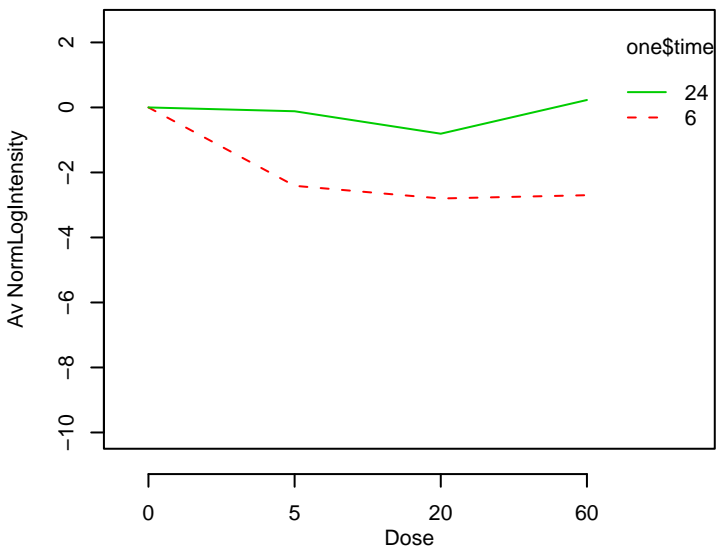

**GO\_0030097 : hemopoiesis**

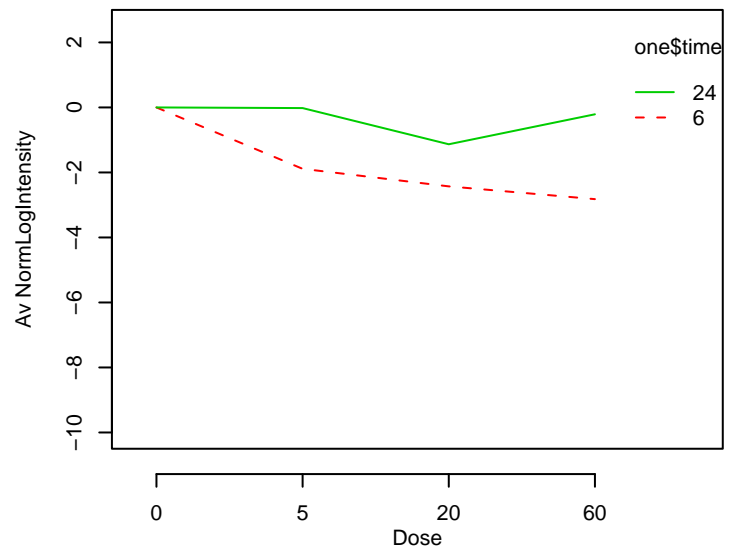

**GO\_0030098 : lymphocyte differentiation**

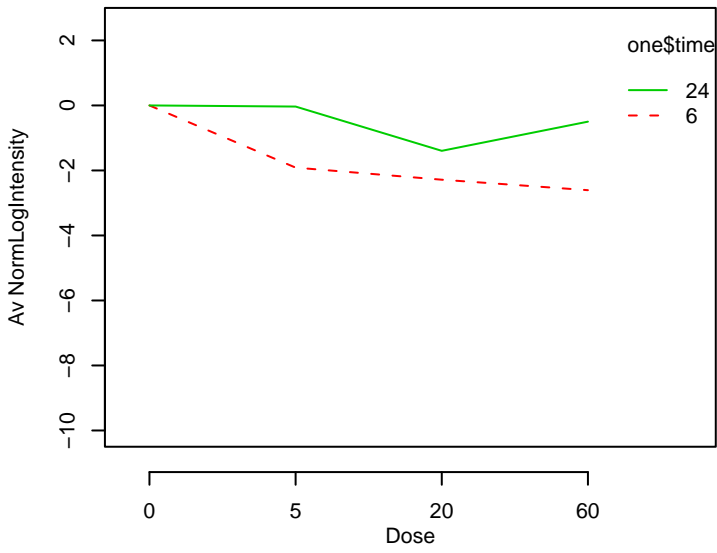

**GO\_0030099 : myeloid cell differentiation**

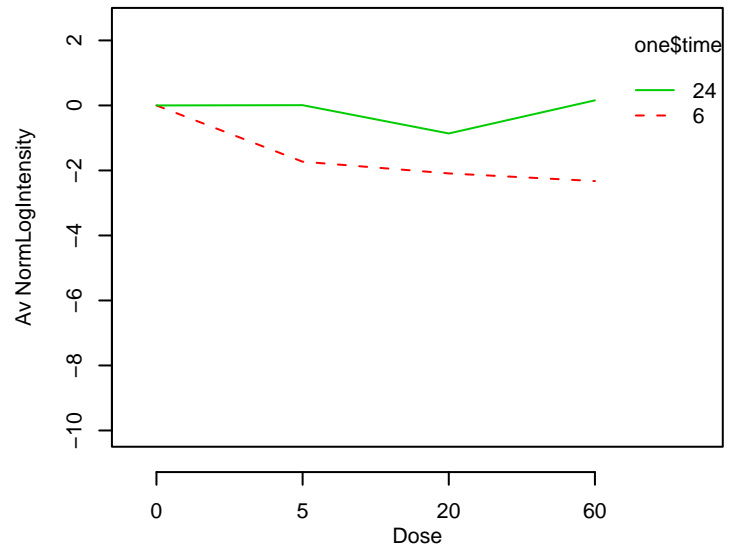

**GO\_0030100 : regulation of endocytosis**

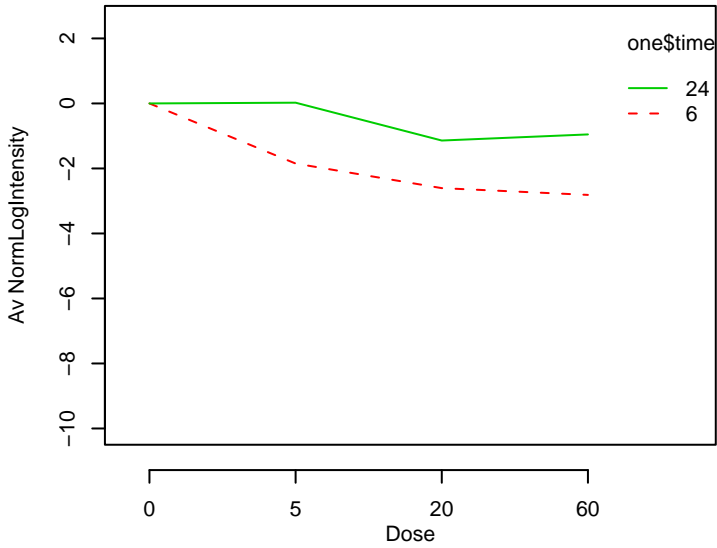

**GO\_0030101 : natural killer cell activation**

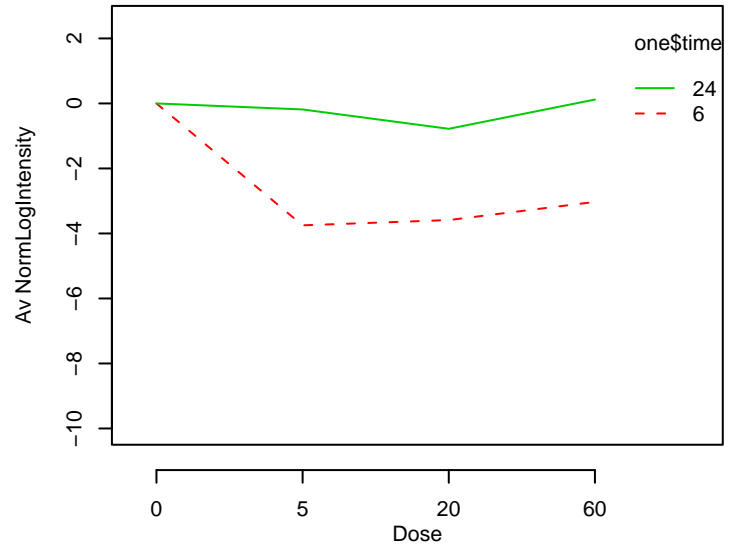

**GO\_0030111 : regulation of Wnt receptor signaling pathwa**

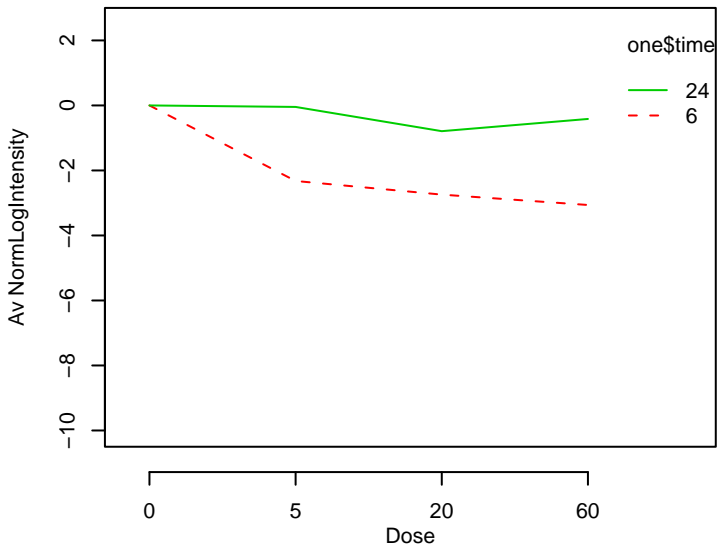

**GO\_0030146 : diuresis**

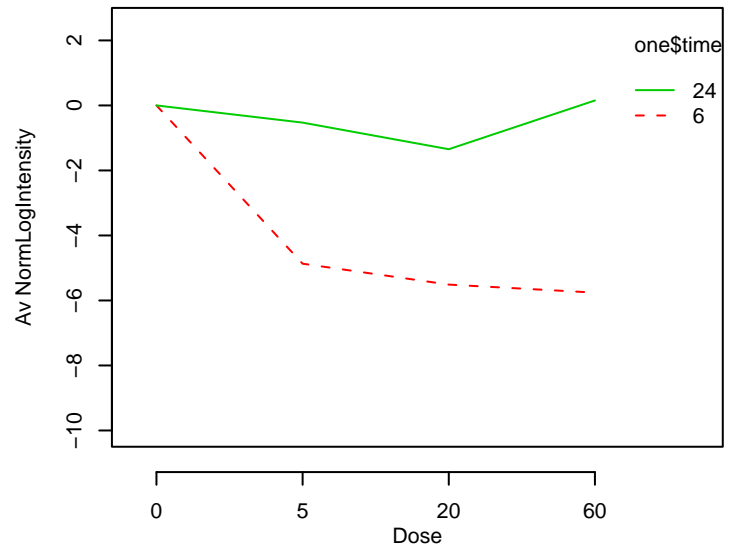

**GO\_0030148 : sphingolipid biosynthesis**

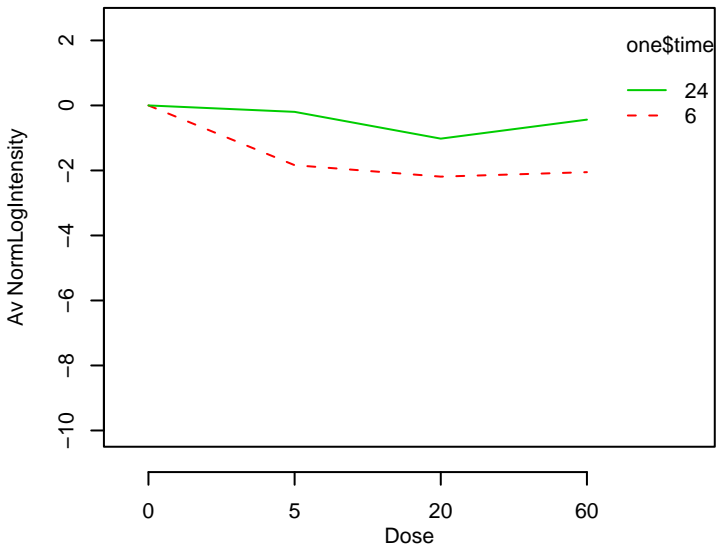

**GO\_0030149 : sphingolipid catabolism**

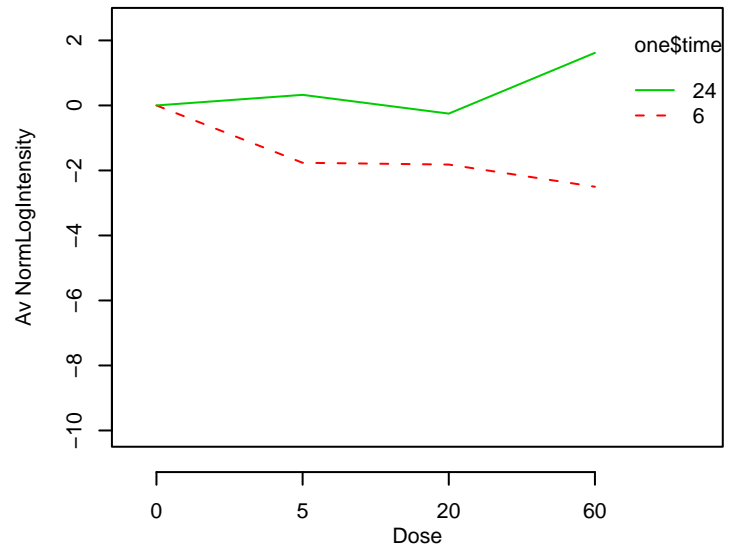

**GO\_0030155 : regulation of cell adhesion**

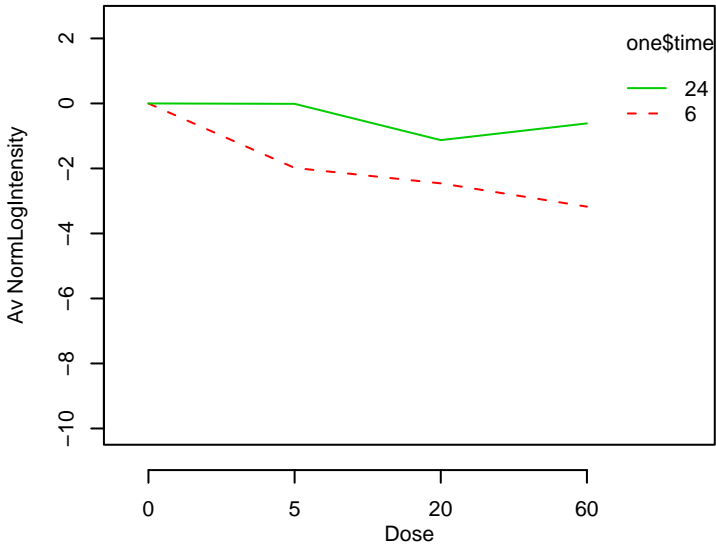

**GO\_0030162 : regulation of proteolysis**

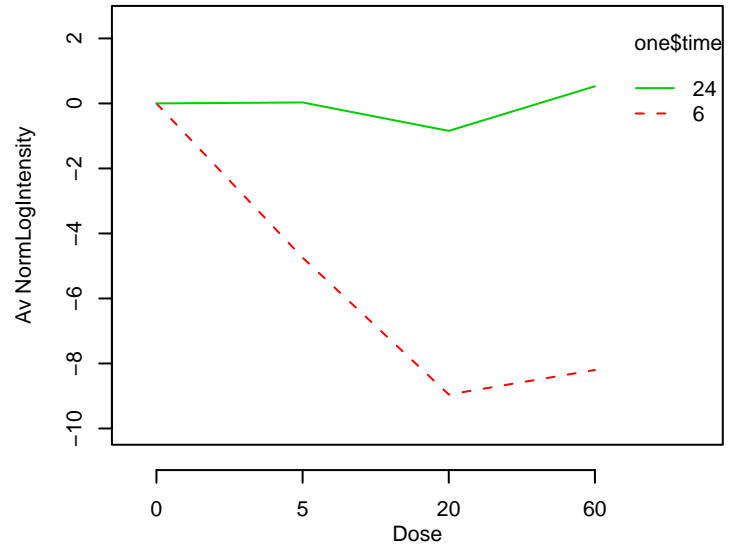

**GO\_0030163 : protein catabolism**

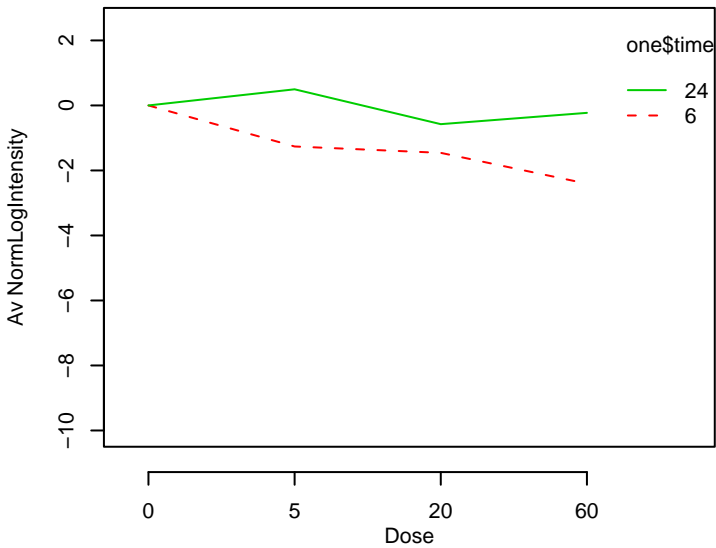

**GO\_0030166 : proteoglycan biosynthesis**

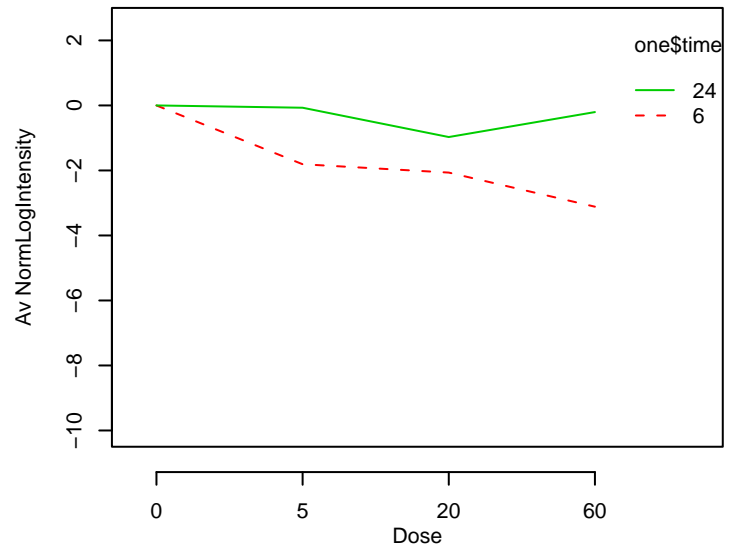

**GO\_0030168 : platelet activation**

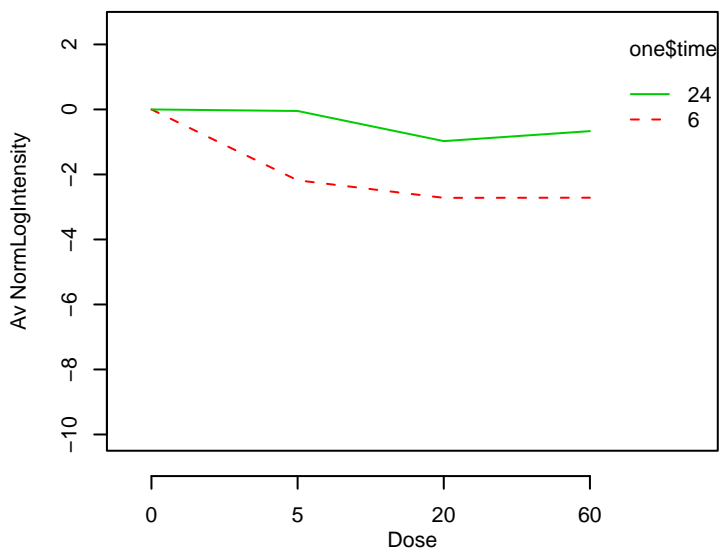

**GO\_0030178 : negative regulation of Wnt receptor signaling**

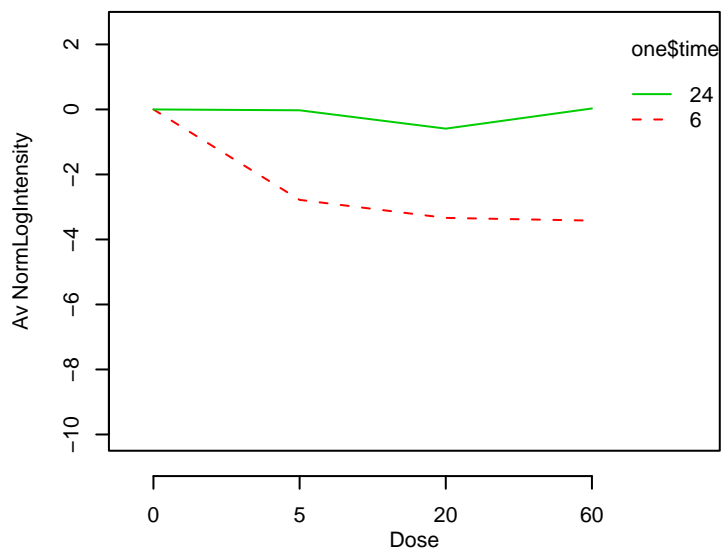

**GO\_0030183 : B cell differentiation**

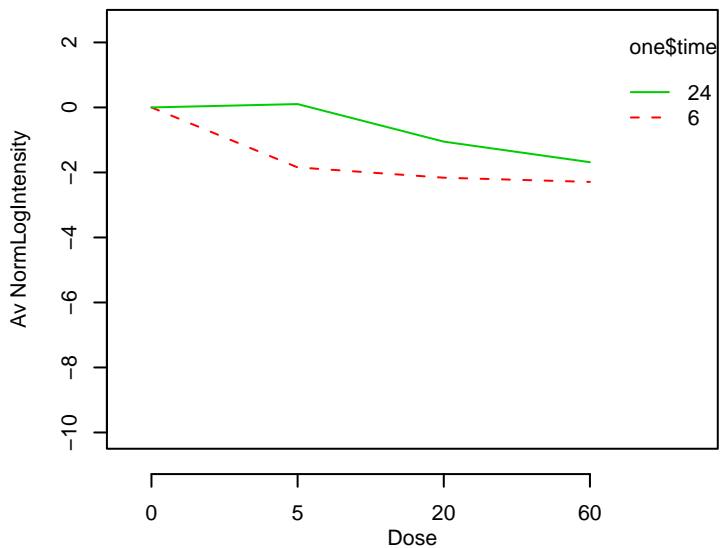

**GO\_0030193 : regulation of blood coagulation**

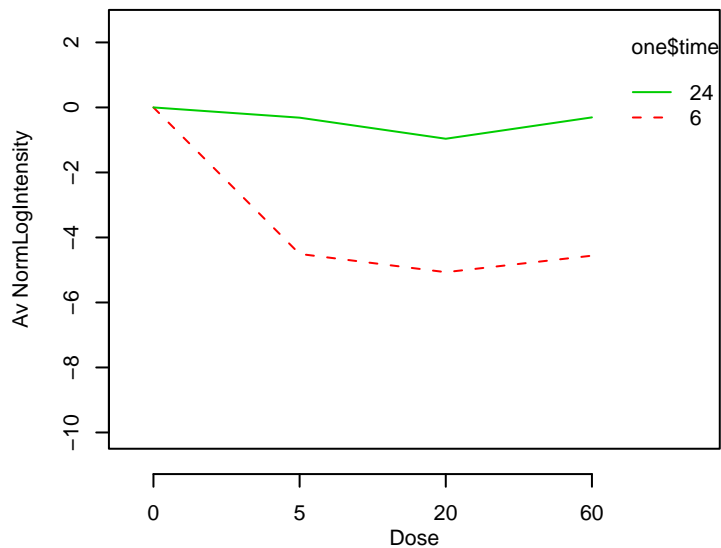

**GO\_0030195 : negative regulation of blood coagulation**      **GO\_0030198 : extracellular matrix organization and biogene**

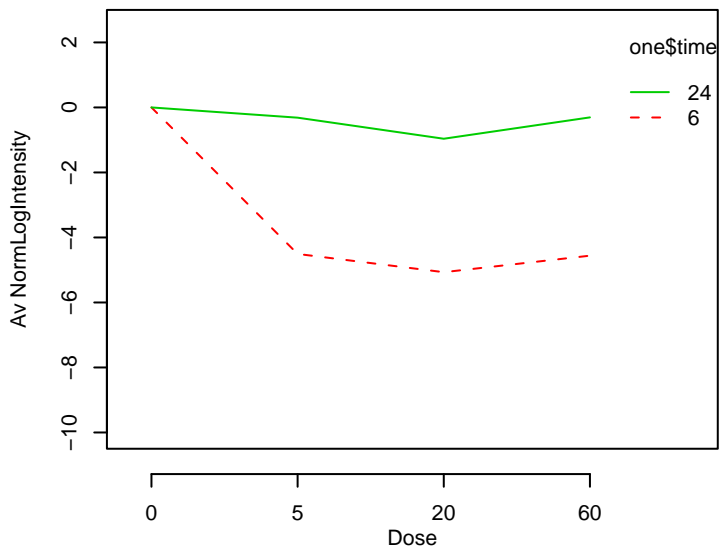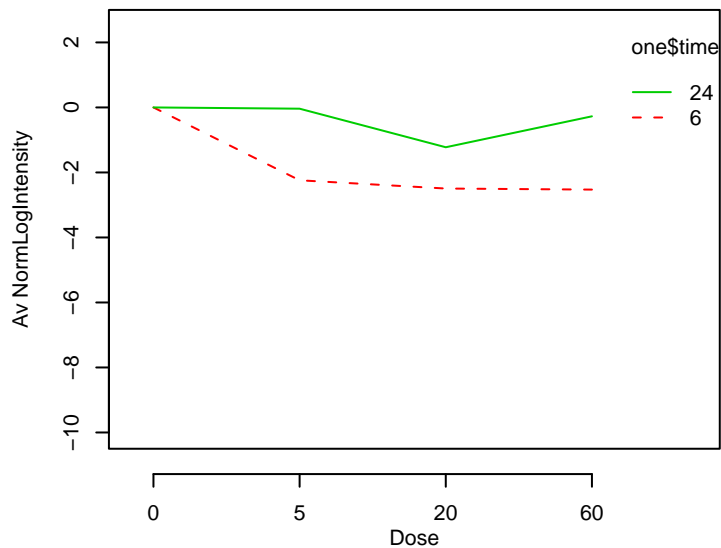

**GO\_0030199 : collagen fibril organization**

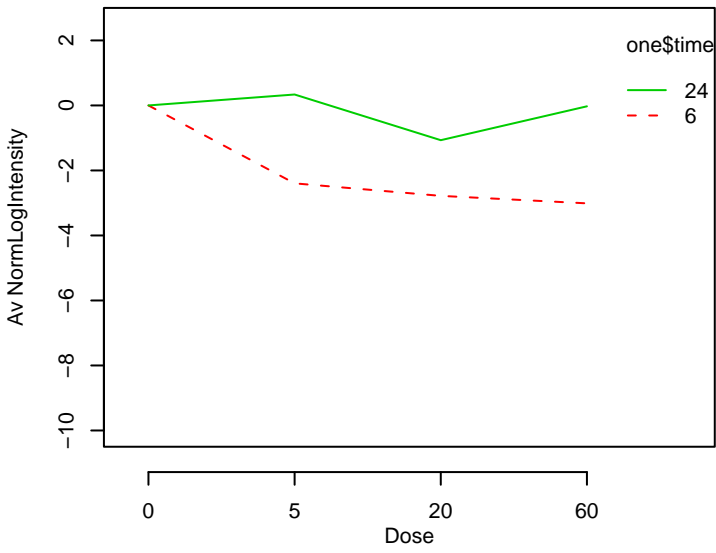

**GO\_0030201 : heparan sulfate proteoglycan metabolism**

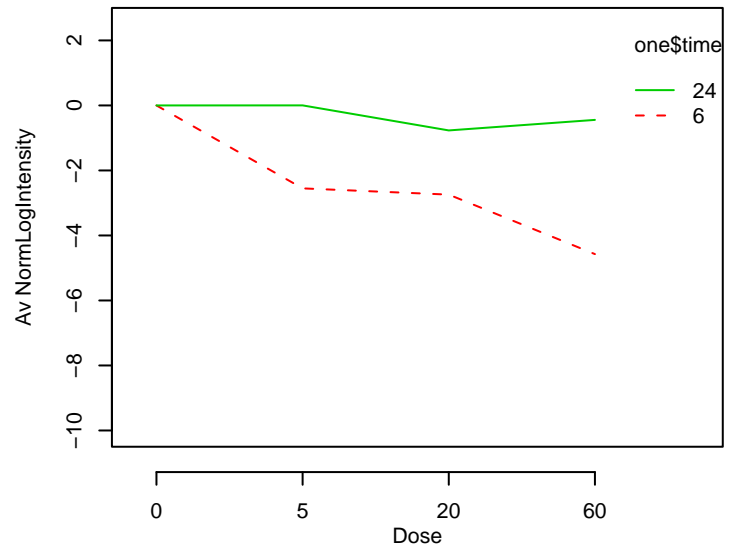

**GO\_0030203 : glycosaminoglycan metabolism**

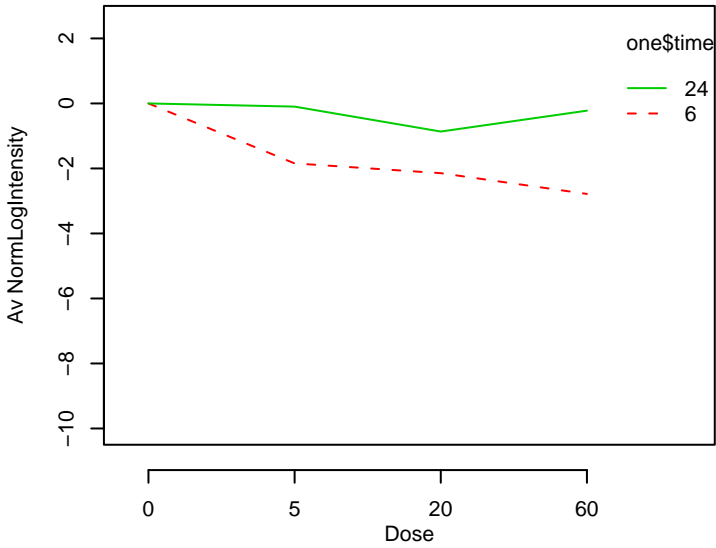

**GO\_0030204 : chondroitin sulfate metabolism**

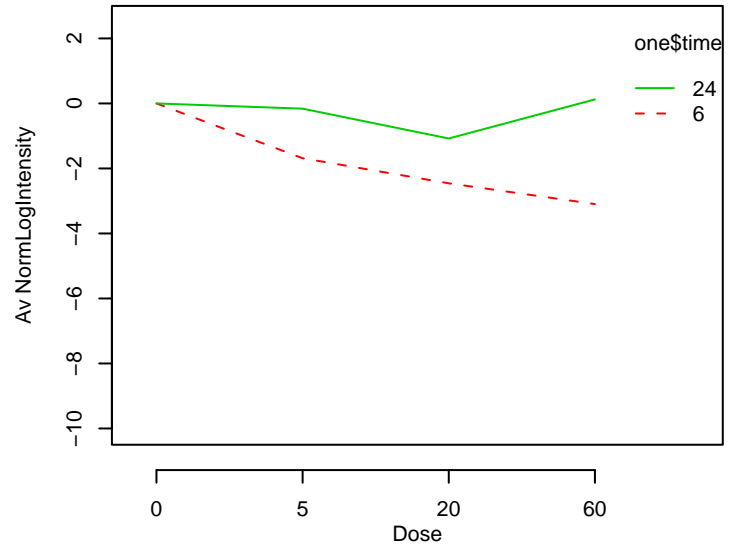

**GO\_0030206 : chondroitin sulfate biosynthesis**

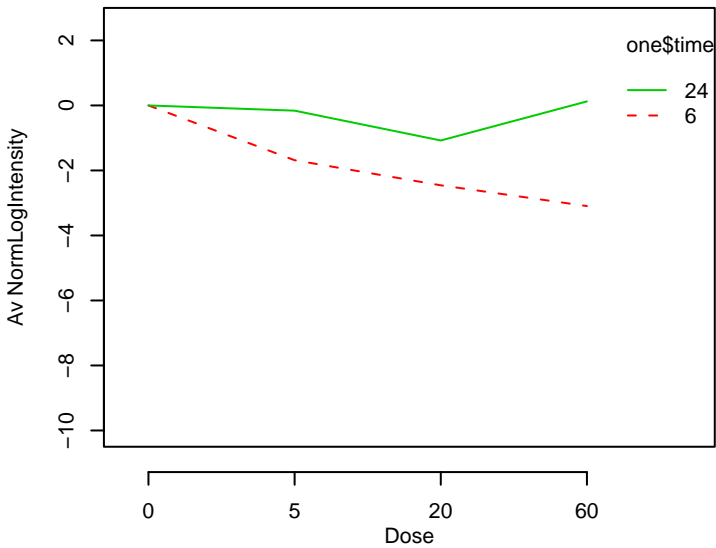

**GO\_0030212 : hyaluronan metabolism**

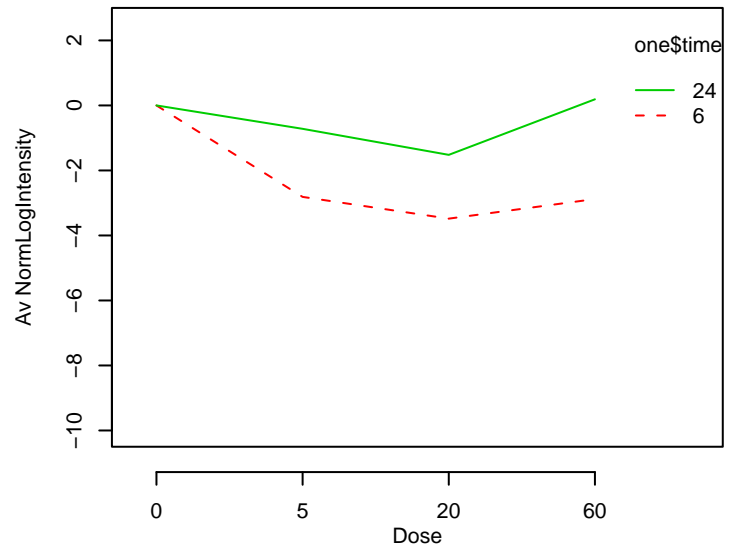

**GO\_0030216 : keratinocyte differentiation**

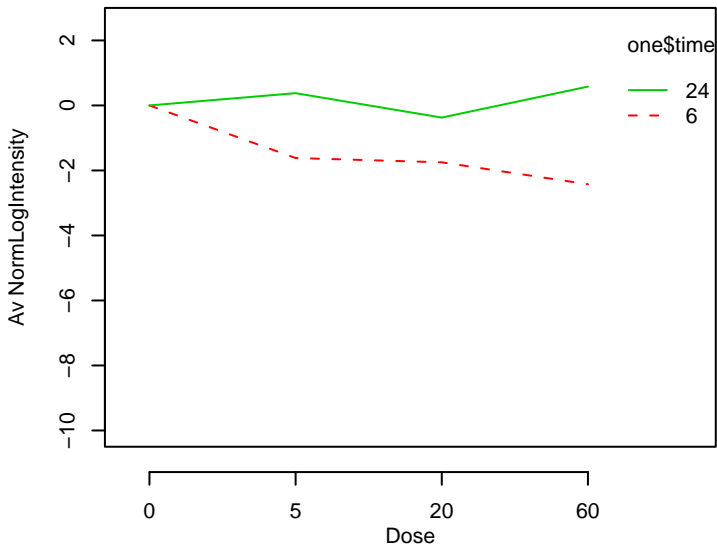

**GO\_0030217 : T cell differentiation**

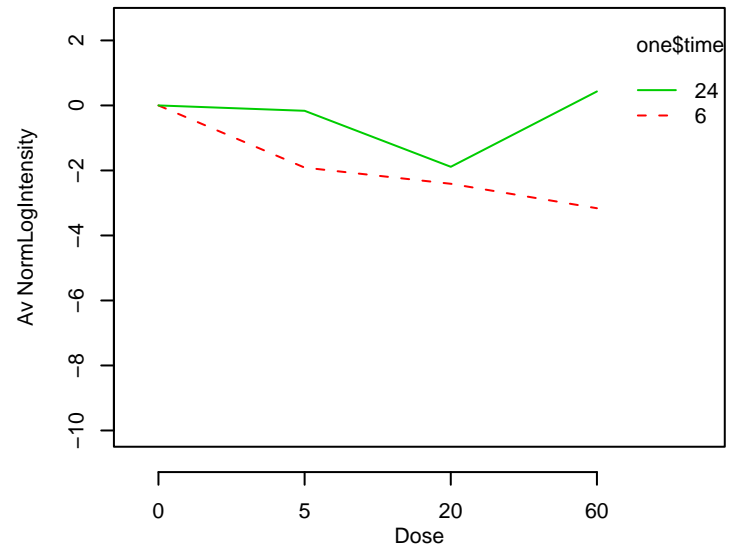

**GO\_0030218 : erythrocyte differentiation**

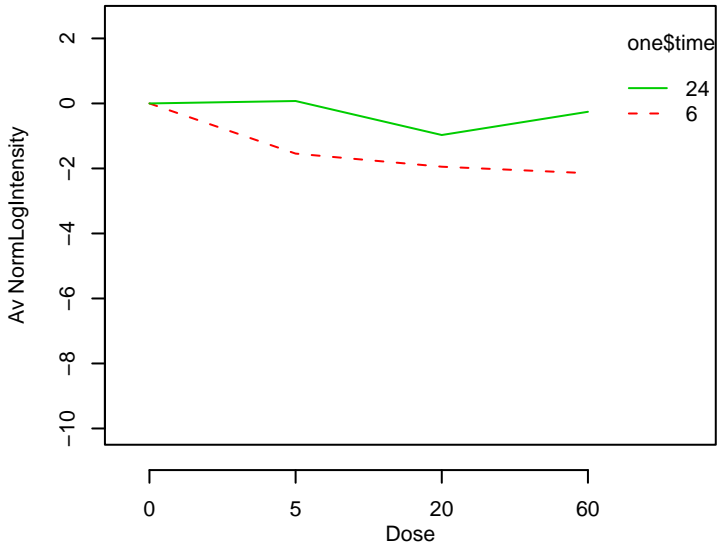

**GO\_0030224 : monocyte differentiation**

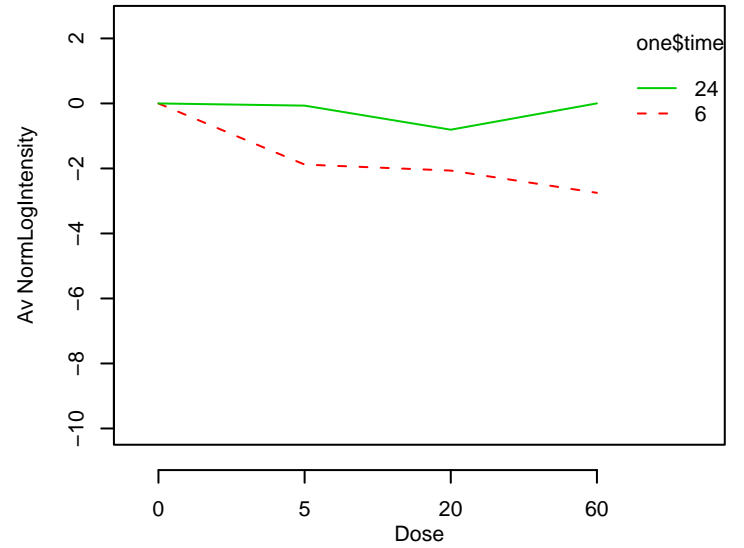

**GO\_0030225 : macrophage differentiation**

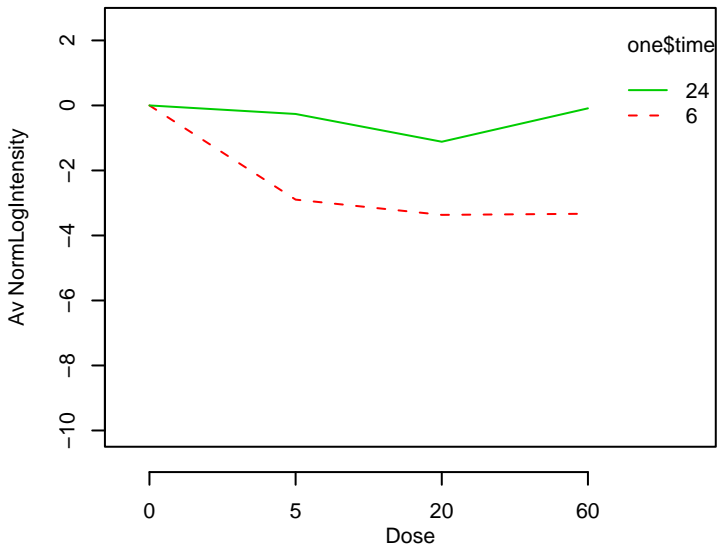

**GO\_0030236 : anti-inflammatory response**

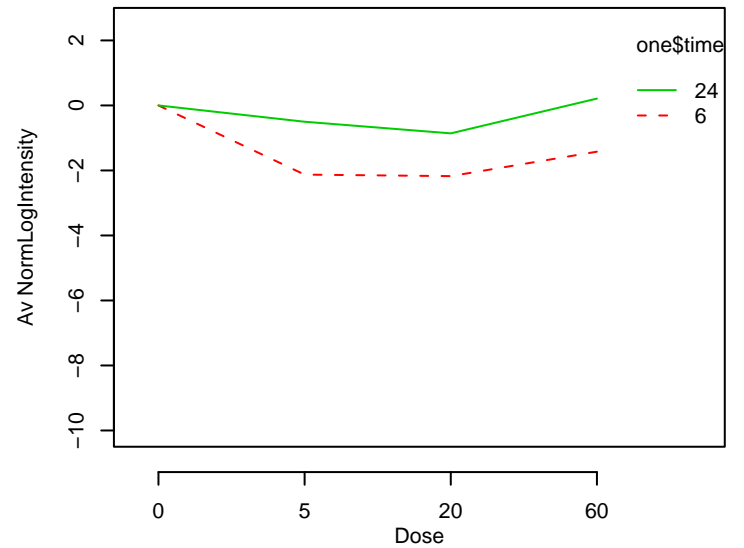

**GO\_0030238 : male sex determination**

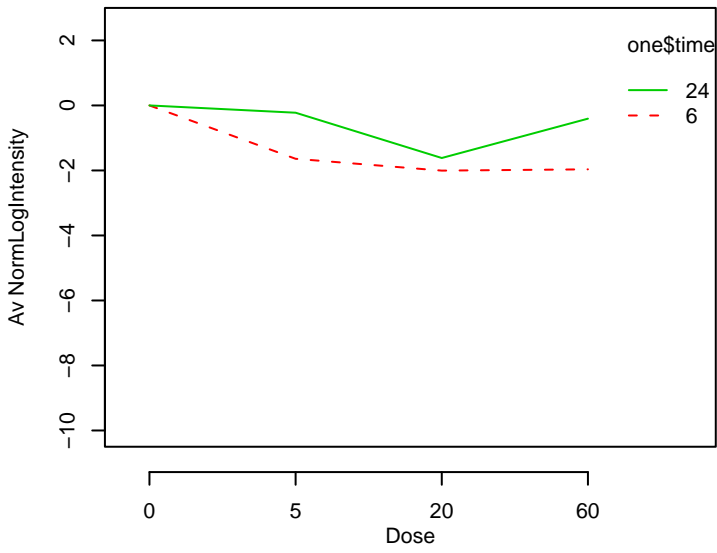

**GO\_0030239 : myofibril assembly**

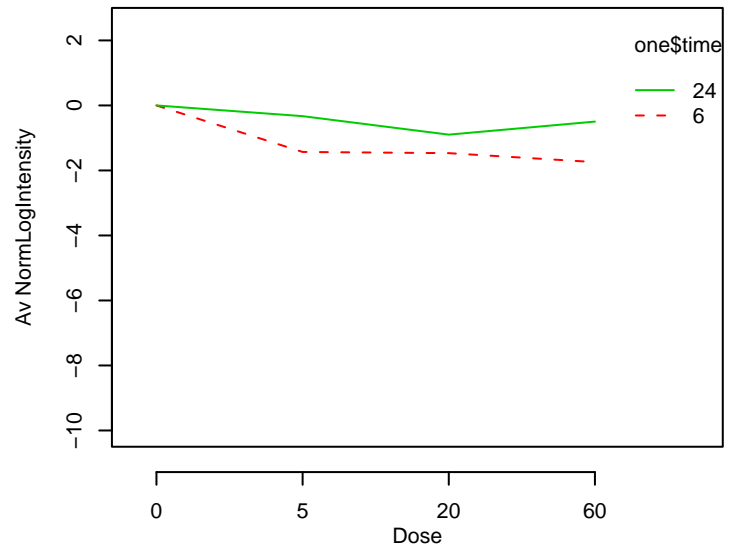

**GO\_0030258 : lipid modification**

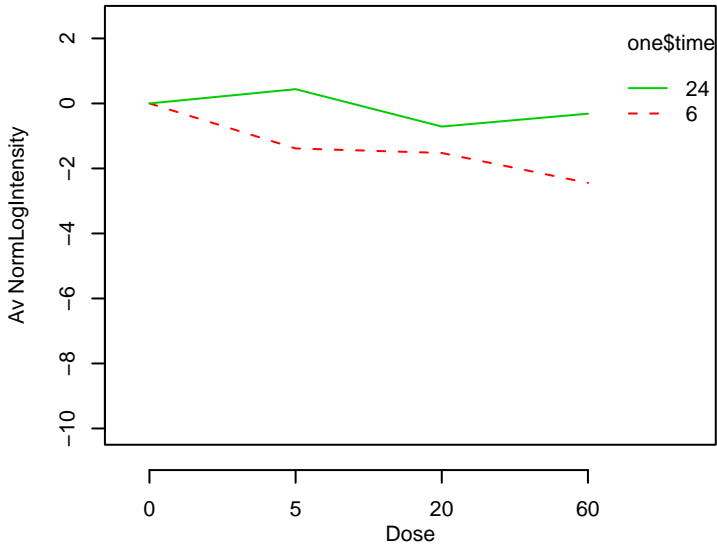

**GO\_0030260 : entry into host cell**

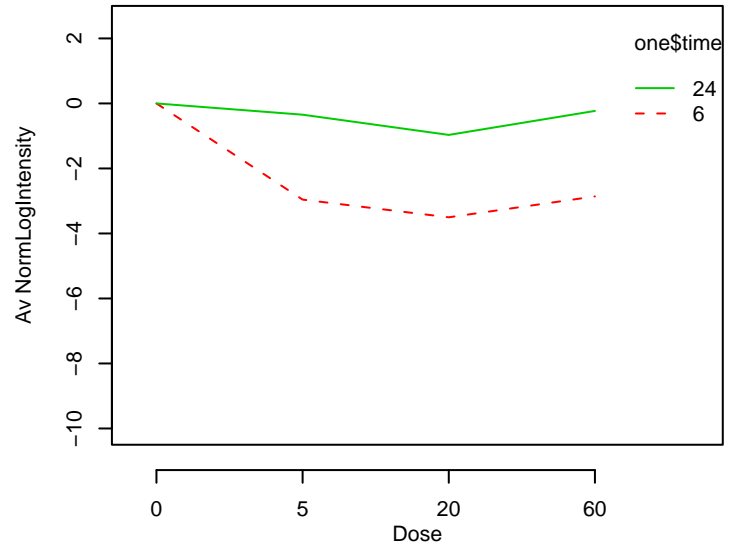

**GO\_0030261 : chromosome condensation**

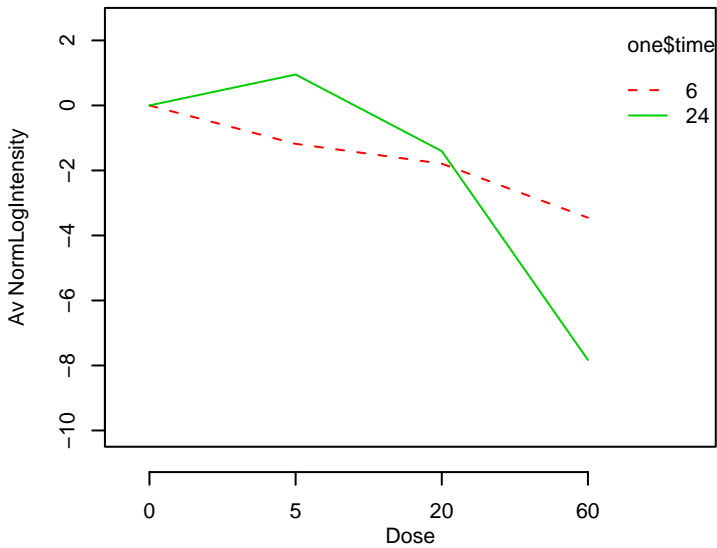

**GO\_0030262 : apoptotic nuclear changes**

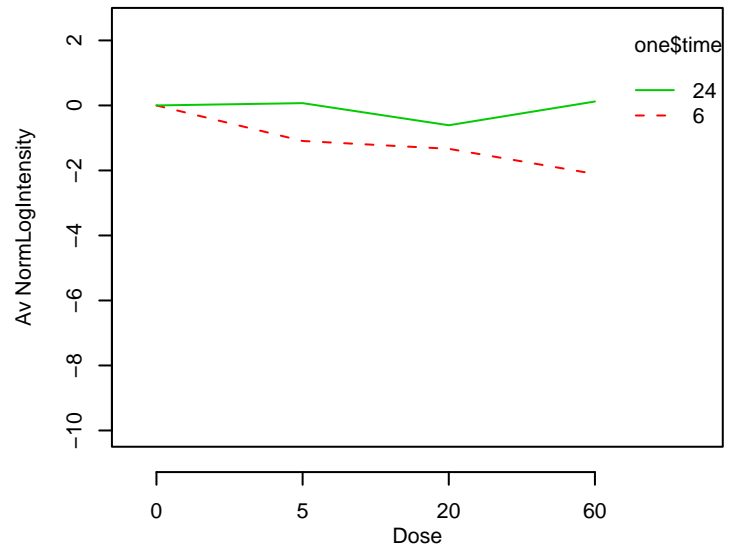

**GO\_0030278 : regulation of ossification**

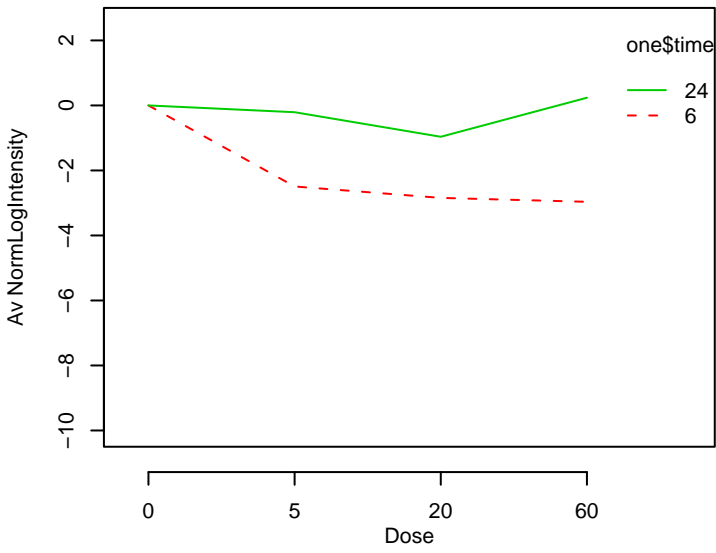

**GO\_0030279 : negative regulation of ossification**

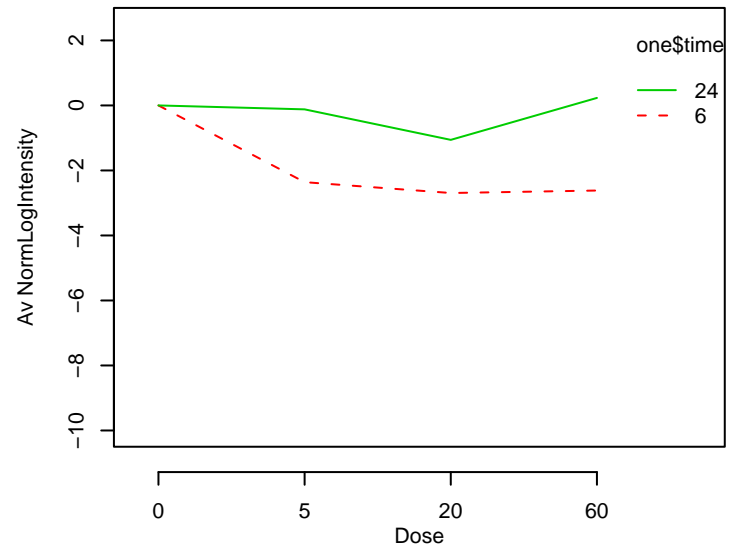

**GO\_0030282 : bone mineralization**

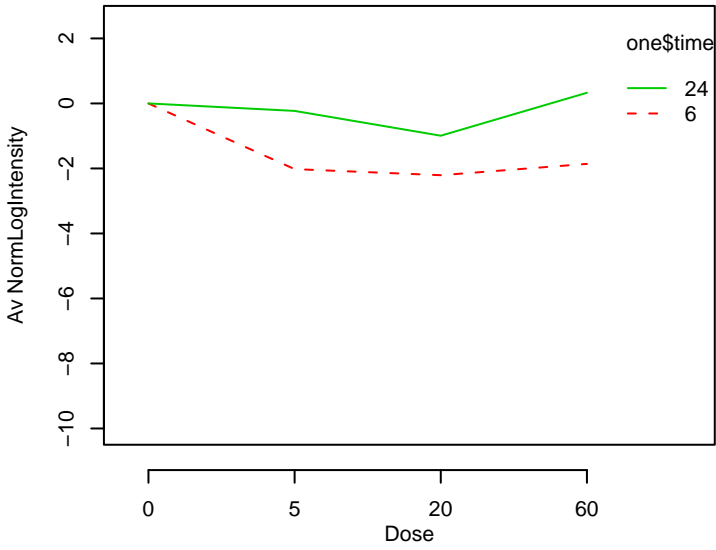

**GO\_0030299 : cholesterol absorption**

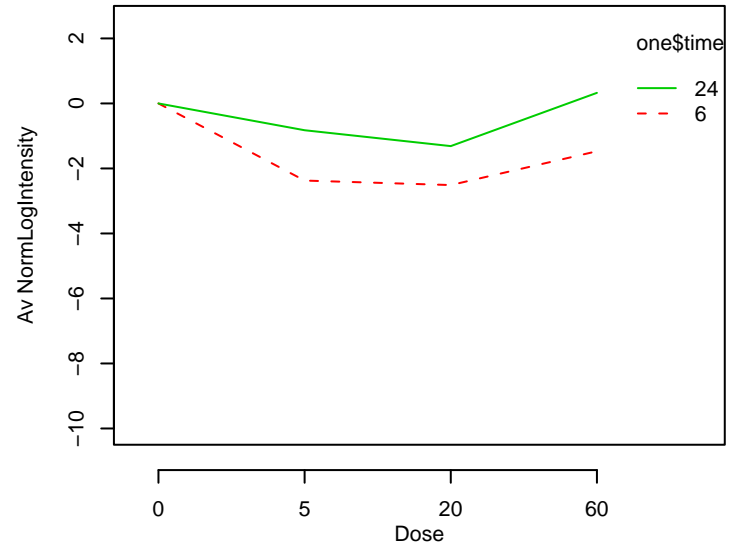

**GO\_0030301 : cholesterol transport**

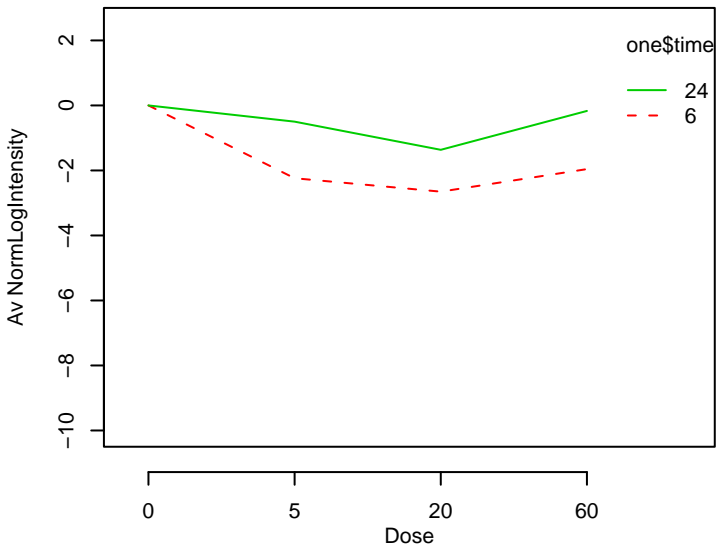

**GO\_0030307 : positive regulation of cell growth**

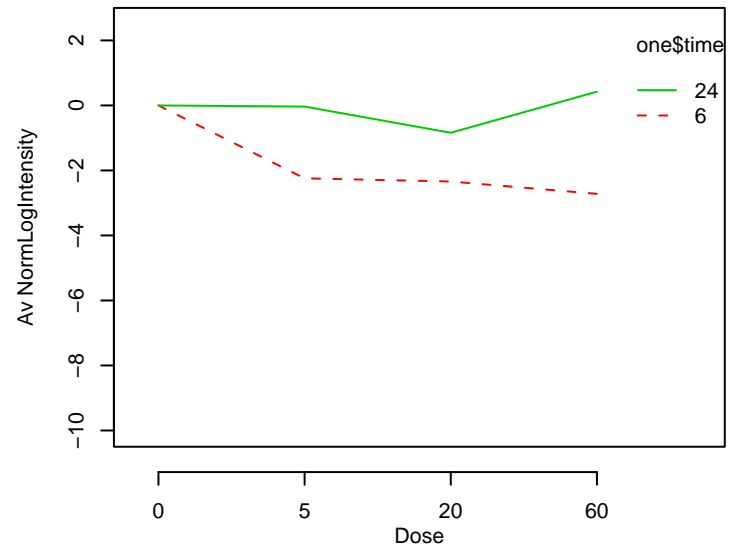



**GO\_0030308 : negative regulation of cell growth**

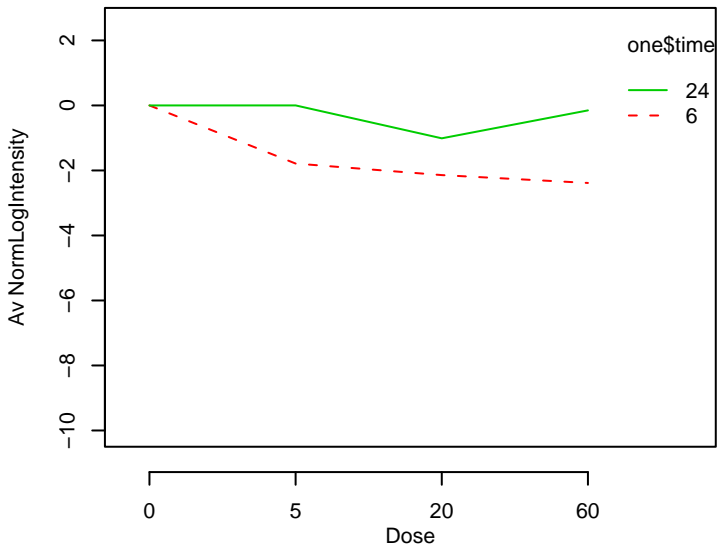

**GO\_0030316 : osteoclast differentiation**

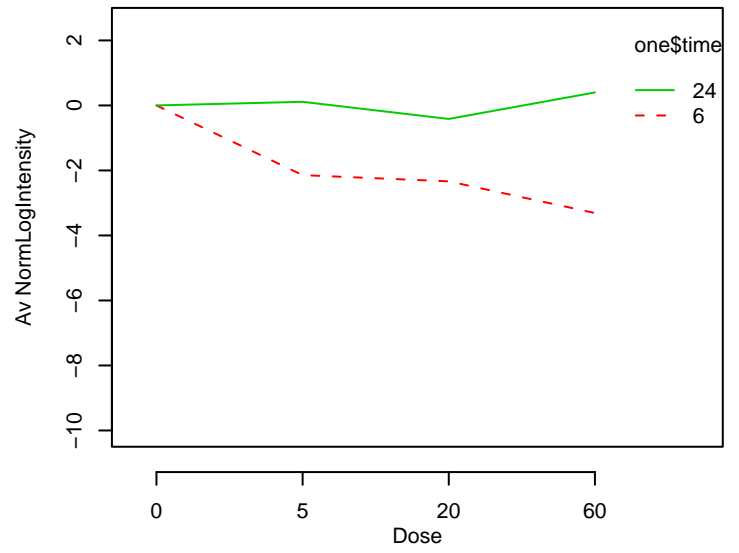

**GO\_0030317 : sperm motility**

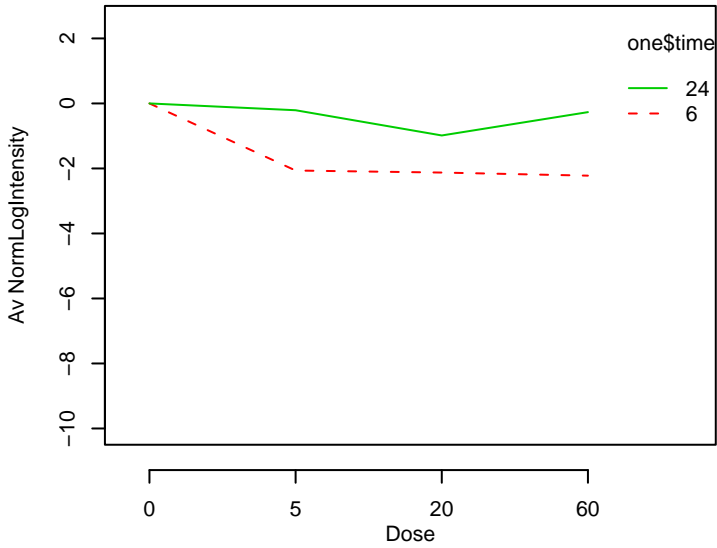

**GO\_0030318 : melanocyte differentiation**

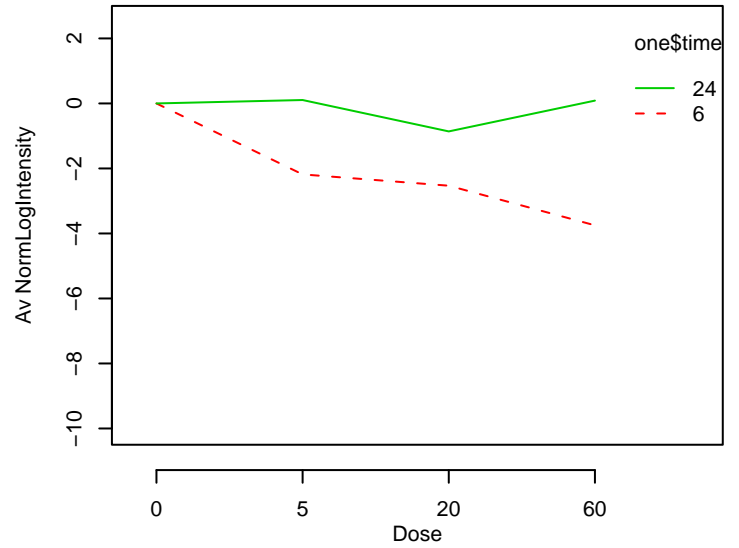

**GO\_0030323 : respiratory tube development**

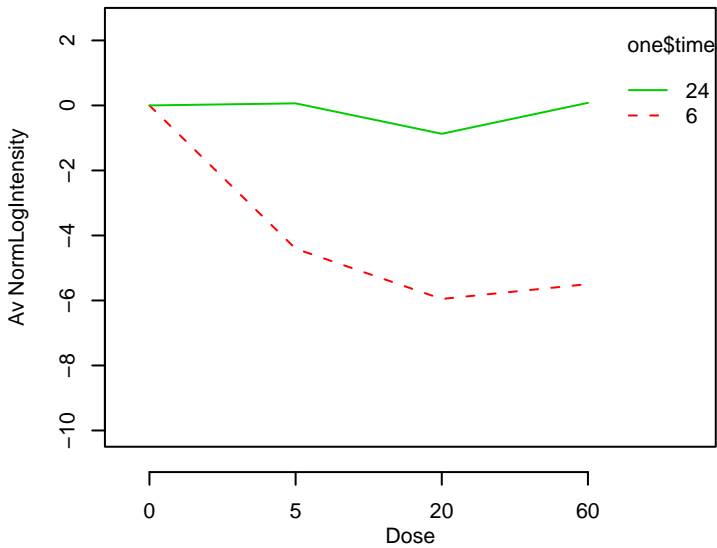

**GO\_0030324 : lung development**

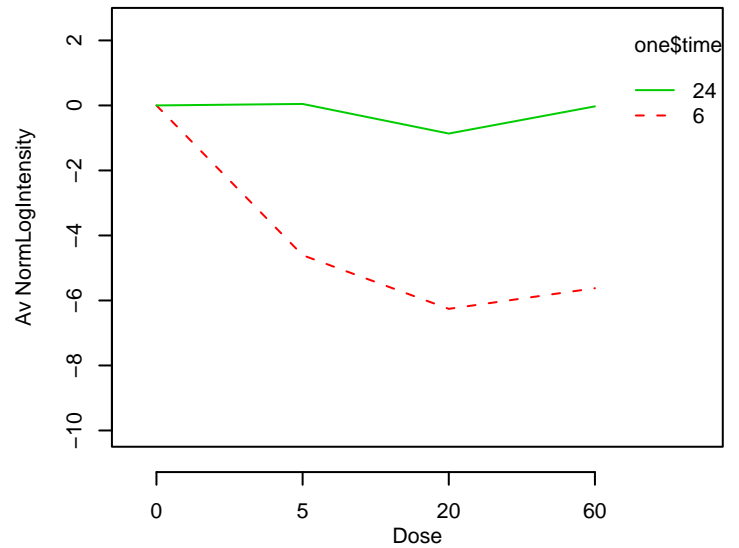

**GO\_0030326 : embryonic limb morphogenesis**

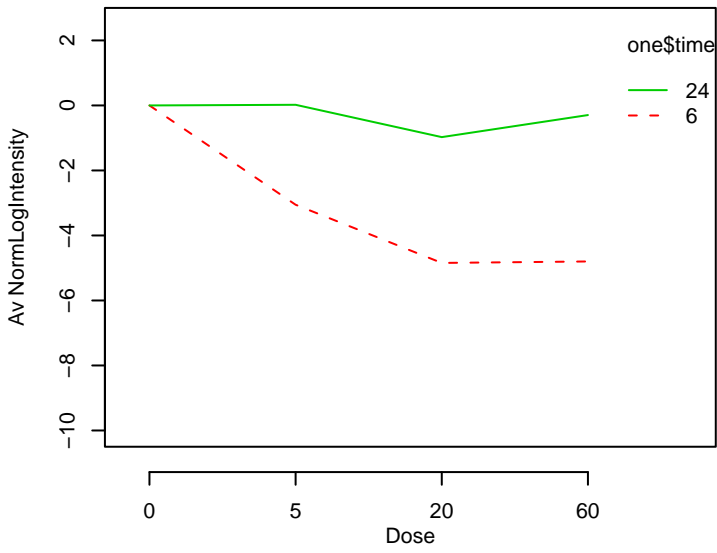

**O\_0030330 : DNA damage response, signal transduction by**

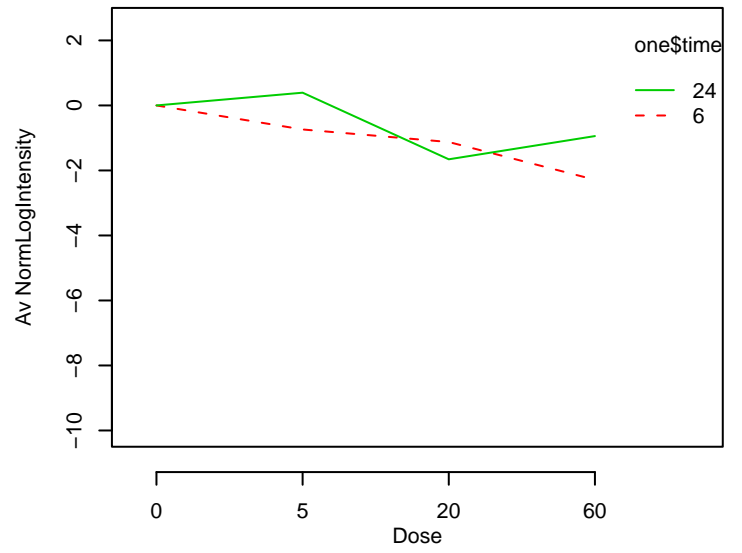

**GO\_0030334 : regulation of cell migration**

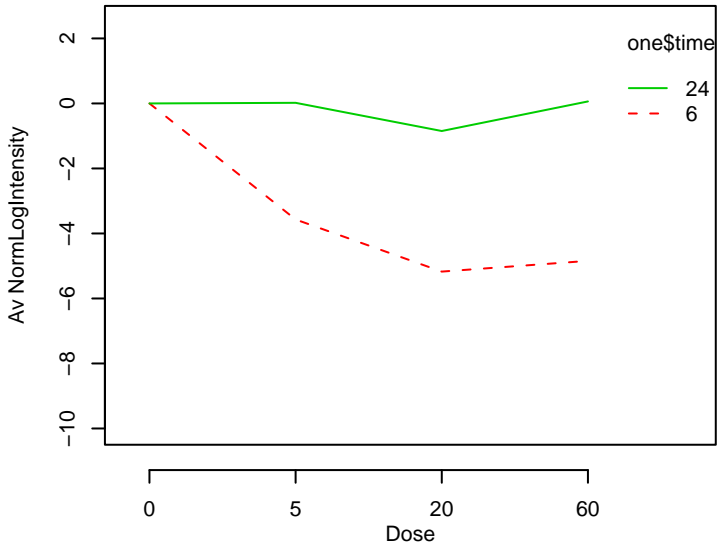

**GO\_0030335 : positive regulation of cell migration**

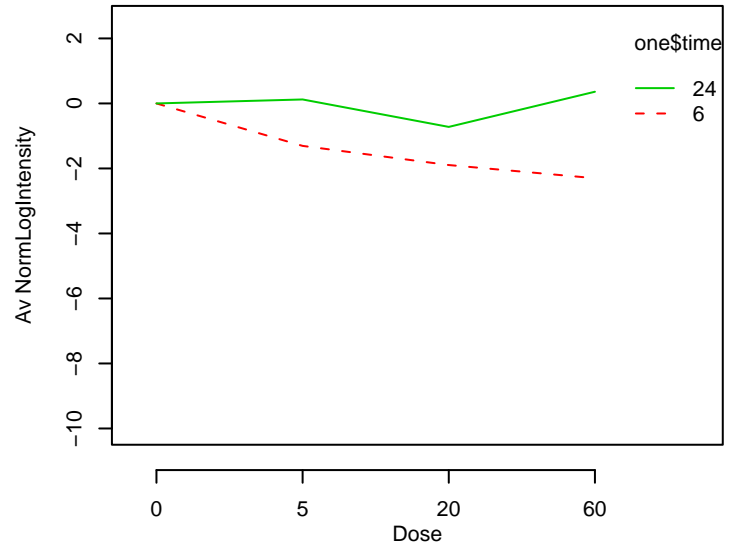

**GO\_0030336 : negative regulation of cell migration**

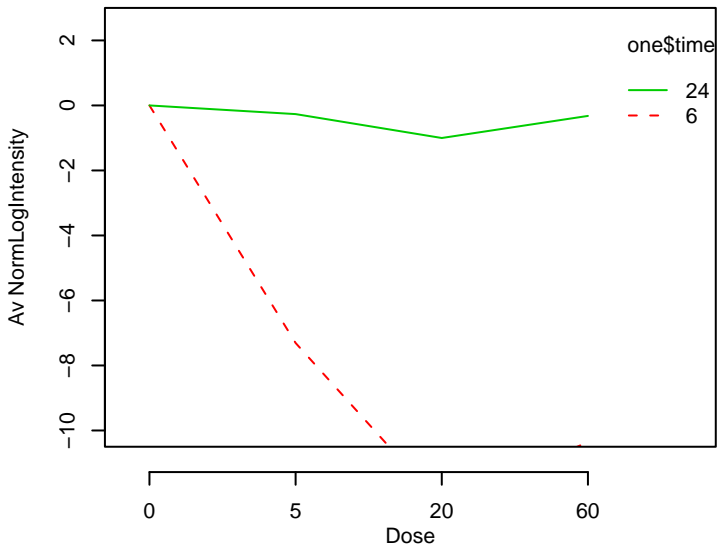

**GO\_0030384 : phosphoinositide metabolism**

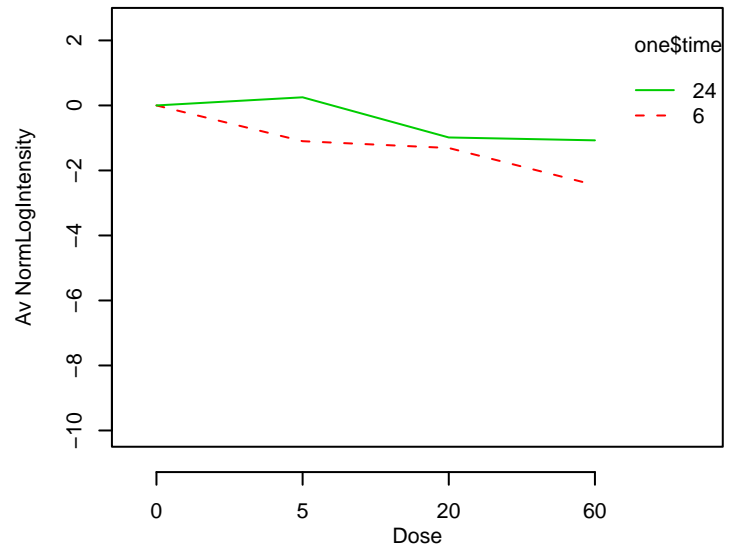

**GO\_0030433 : ER-associated protein catabolism**

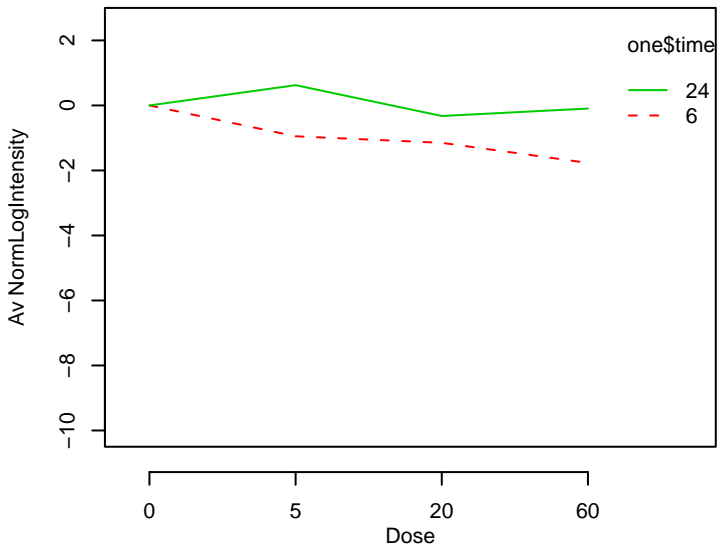

**GO\_0030500 : regulation of bone mineralization**

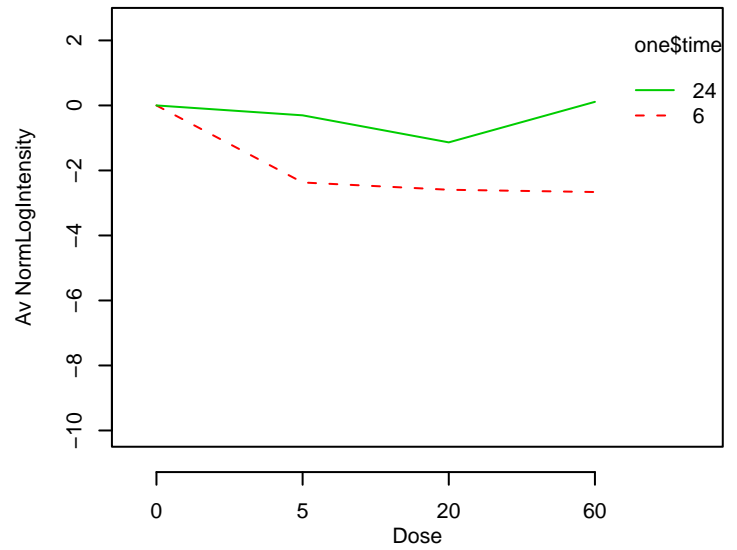

**GO\_0030501 : positive regulation of bone mineralization**

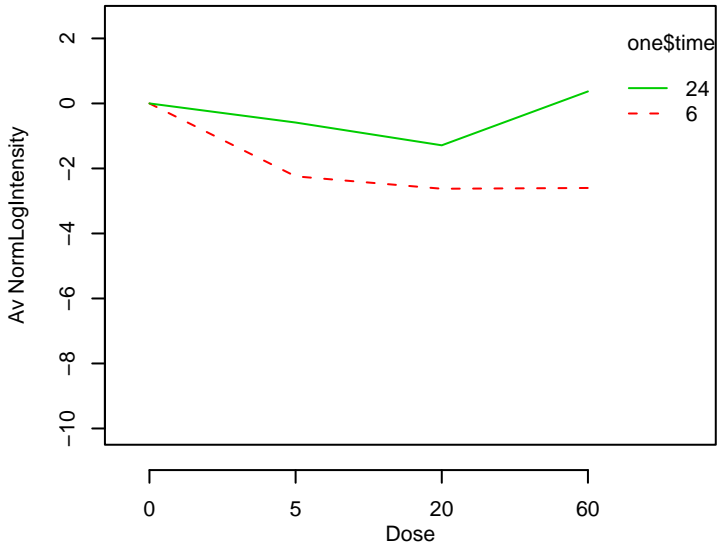

**GO\_0030503 : regulation of cell redox homeostasis**

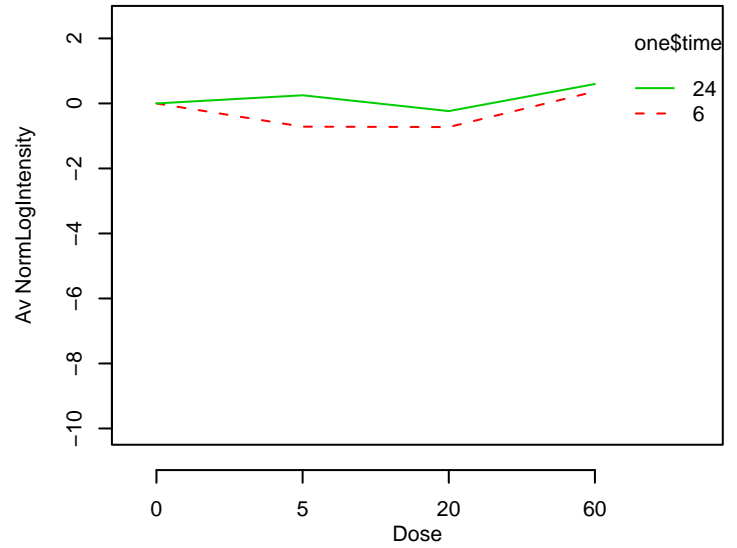

**GO\_0030509 : BMP signaling pathway**

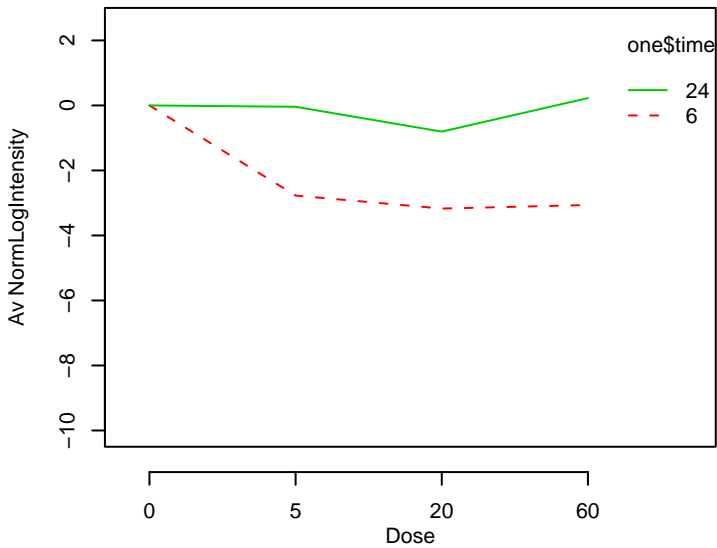

**GO\_0030510 : regulation of BMP signaling pathway**

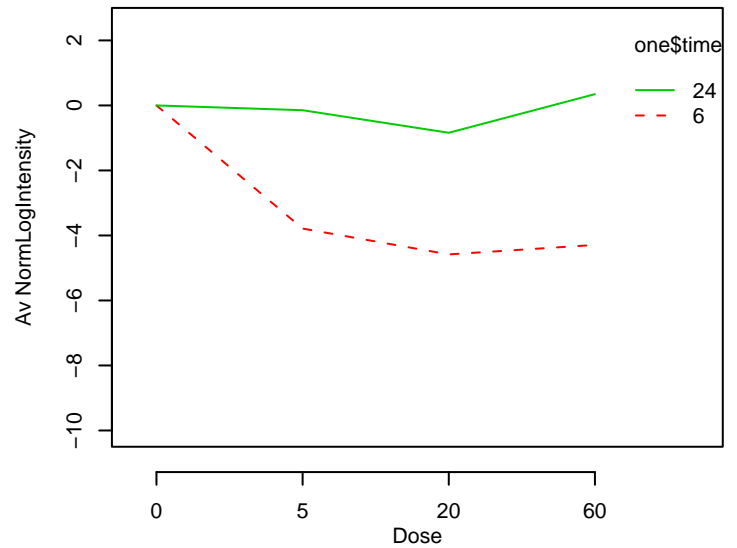

**GO\_0030512 : negative regulation of transforming growth factor**

**GO\_0030514 : negative regulation of BMP signaling pathway**

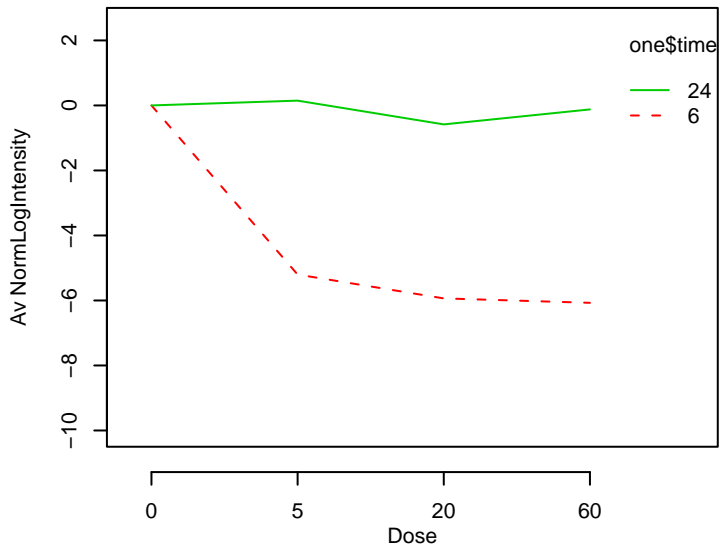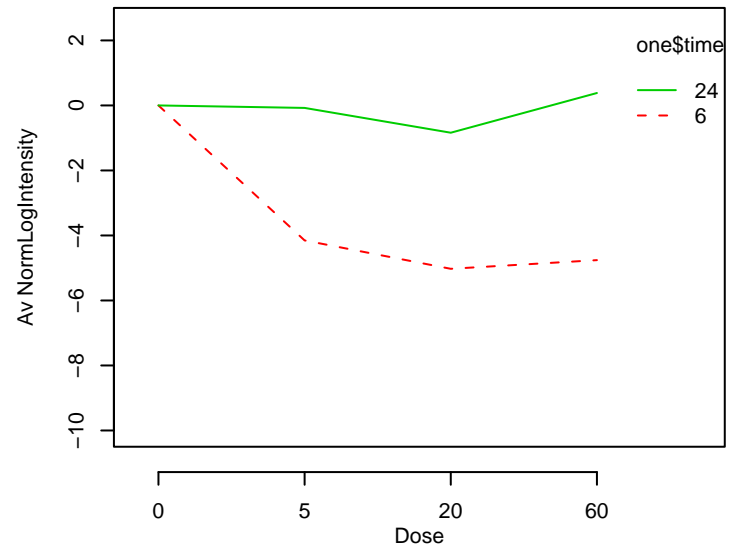

**GO\_0030516 : regulation of axon extension**

**GO\_0030517 : negative regulation of axon extension**

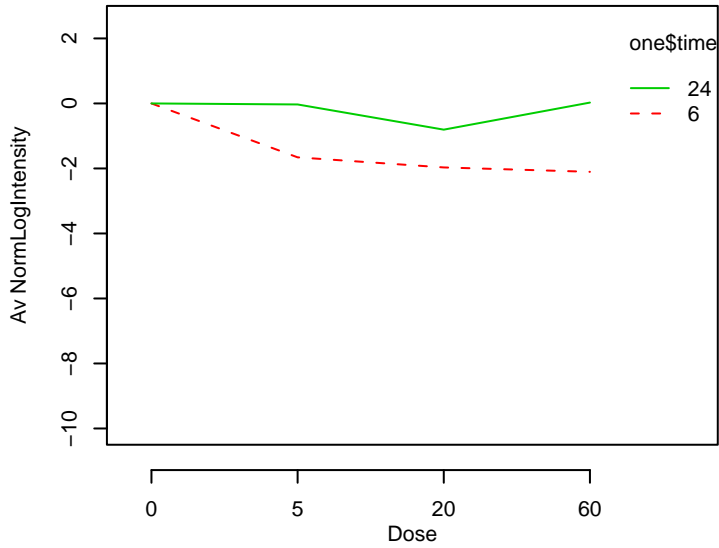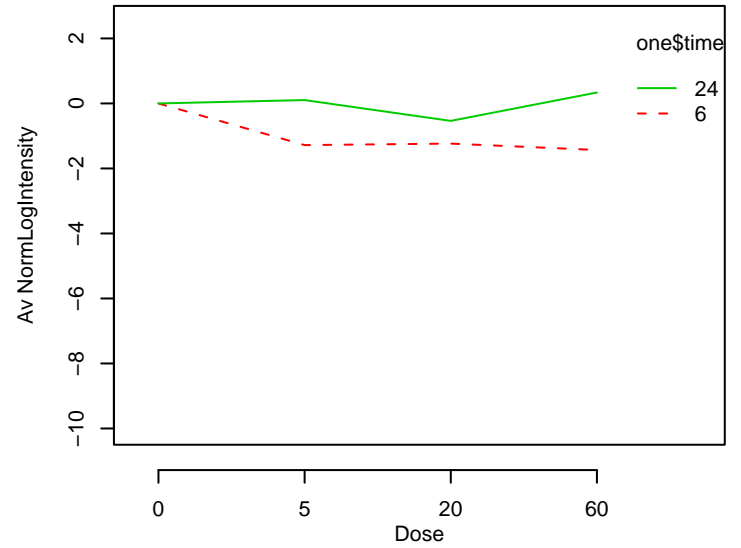

**GO\_0030518 : steroid hormone receptor signaling pathway**

**GO\_0030520 : estrogen receptor signaling pathway**

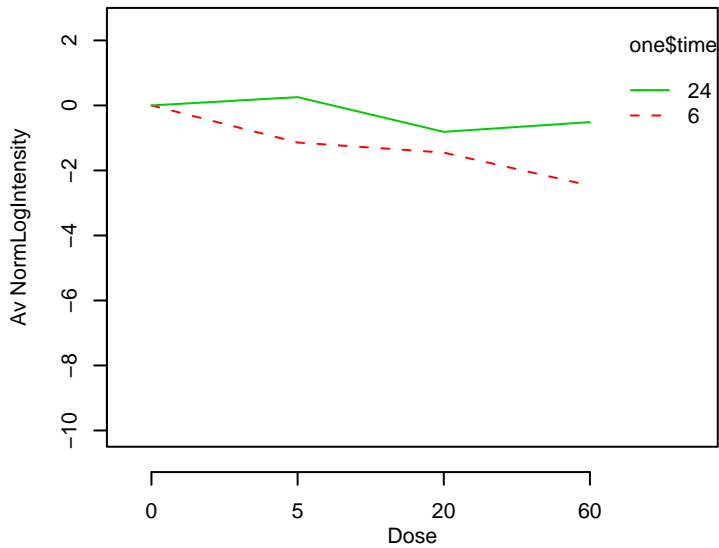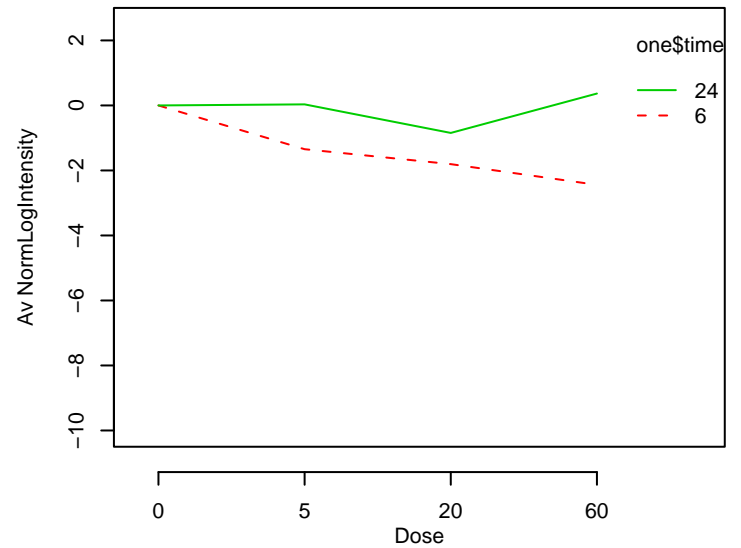

**GO\_0030521 : androgen receptor signaling pathway**

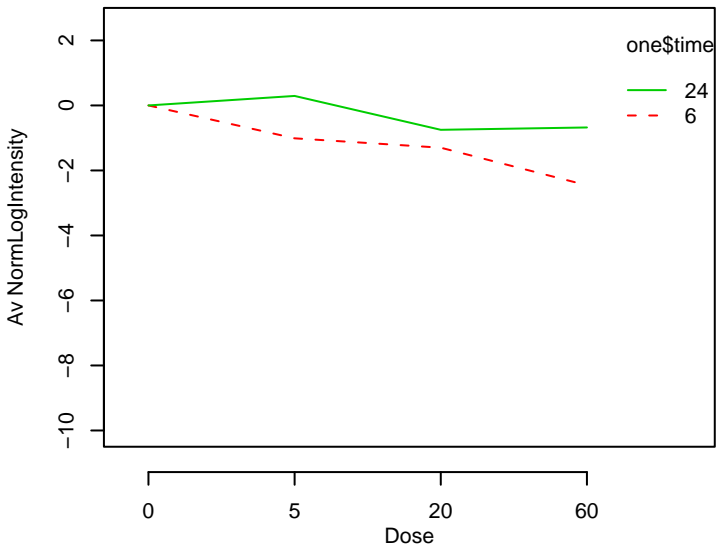

**GO\_0030522 : intracellular receptor-mediated signaling path**

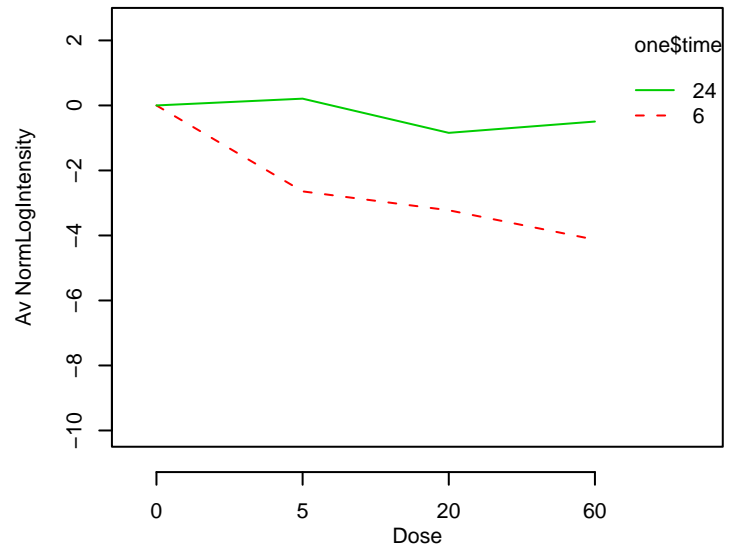

**GO\_0030534 : adult behavior**

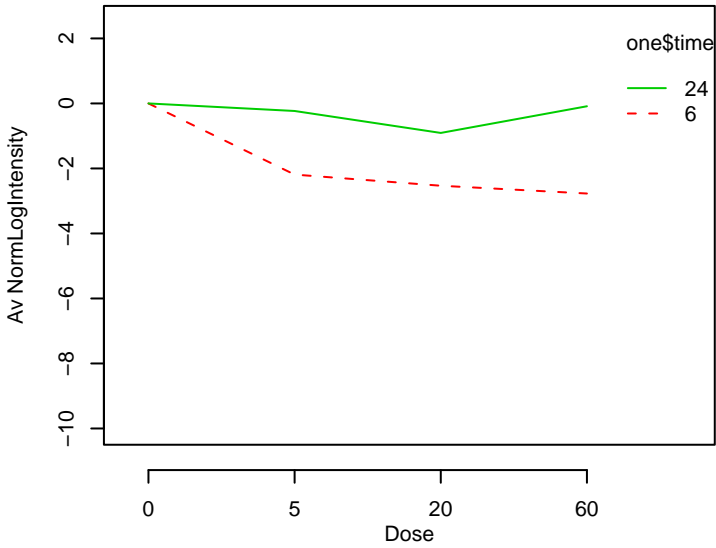

**GO\_0030539 : male genitalia development**

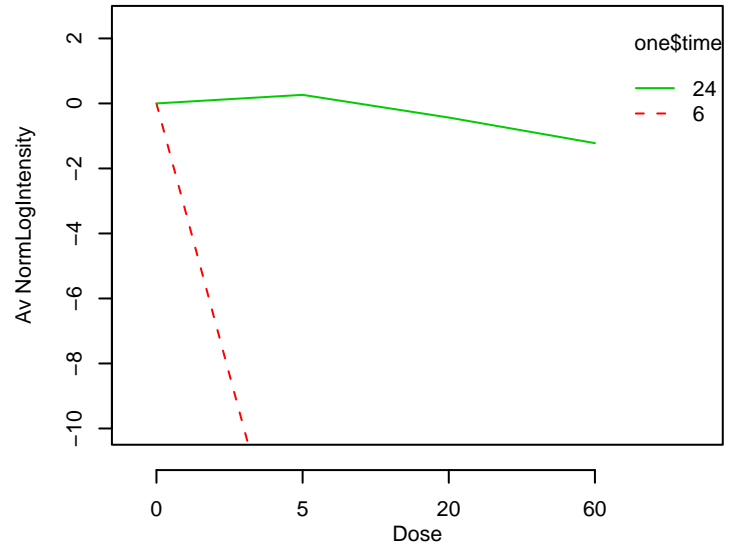

**GO\_0030574 : collagen catabolism**

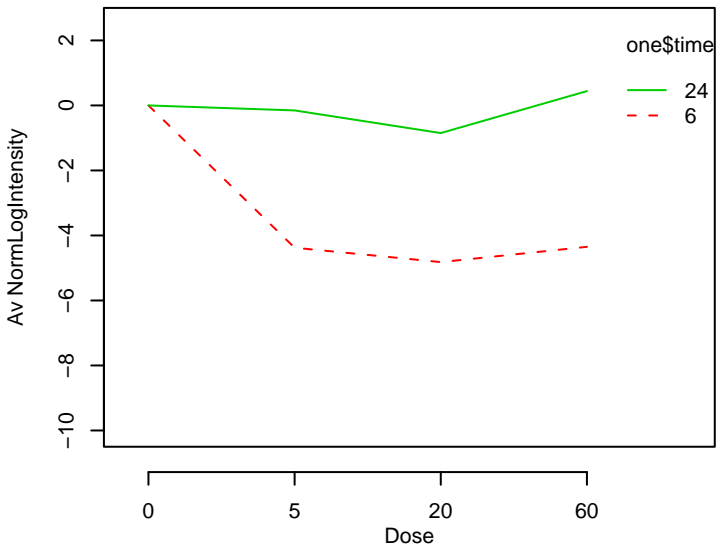

**GO\_0030593 : neutrophil chemotaxis**

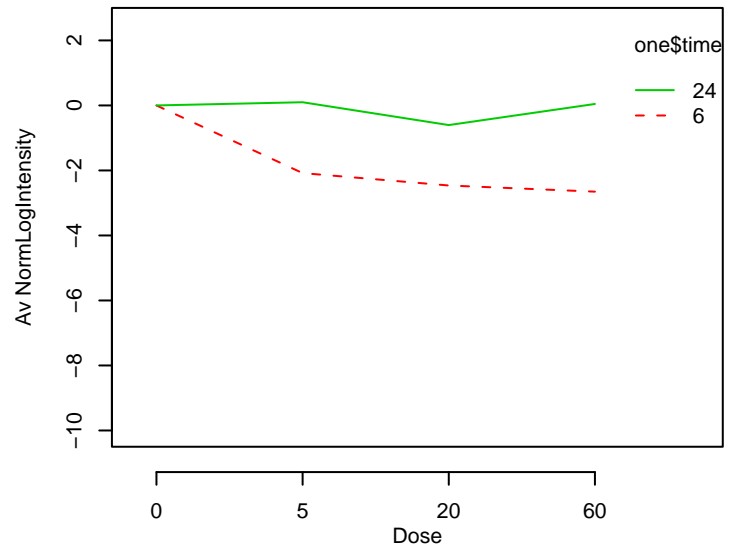

**GO\_0030595 : leukocyte chemotaxis**

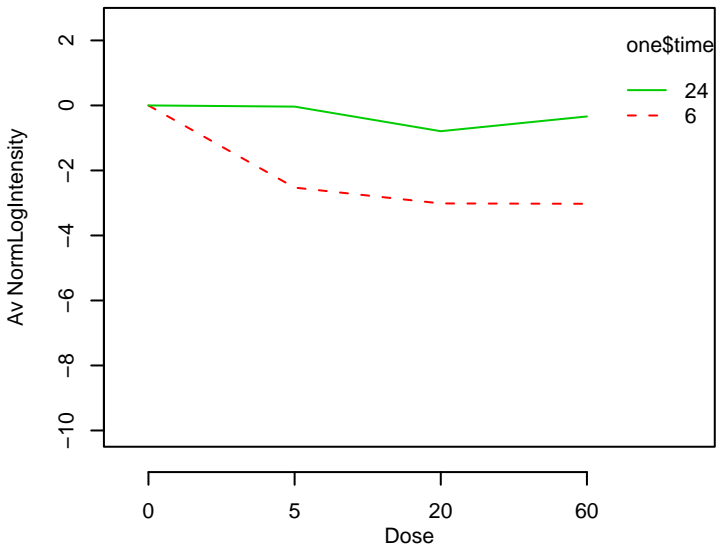

**GO\_0030641 : hydrogen ion homeostasis**

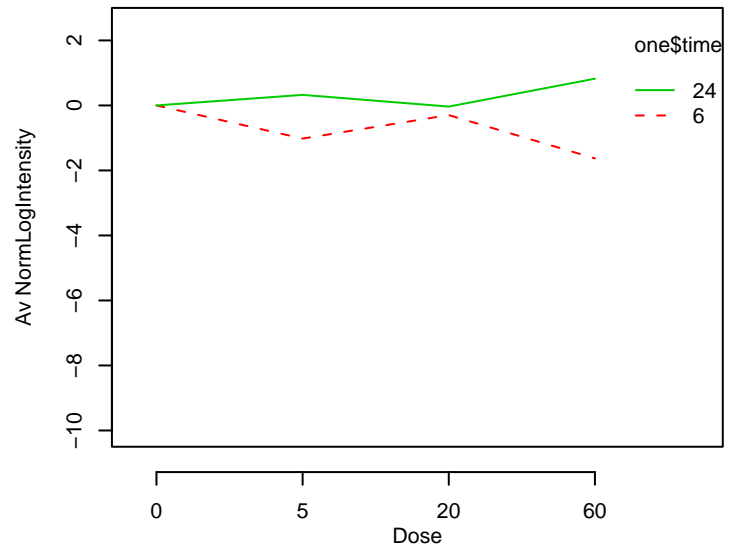

**GO\_0030705 : cytoskeleton-dependent intracellular transp**

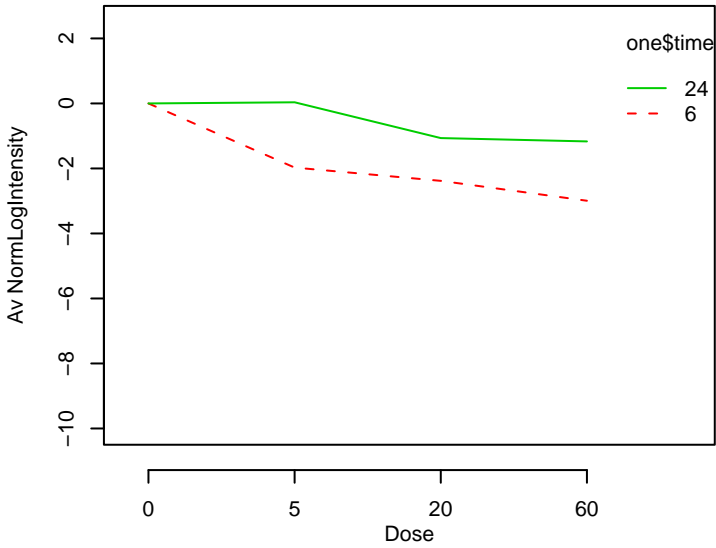

**GO\_0030728 : ovulation**

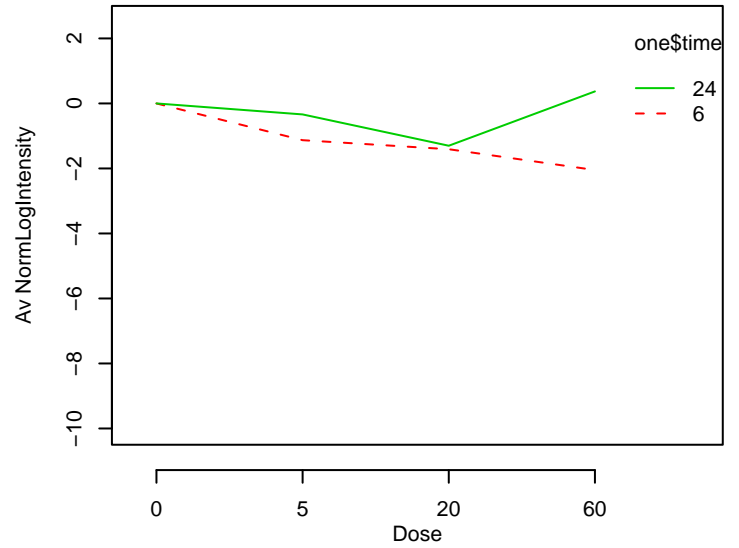

**GO\_0030799 : regulation of cyclic nucleotide metabolism**

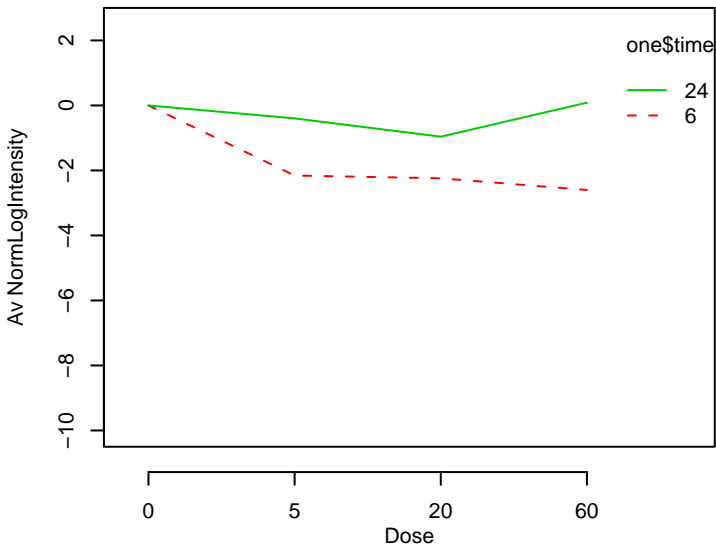

**GO\_0030802 : regulation of cyclic nucleotide biosynthesis:**

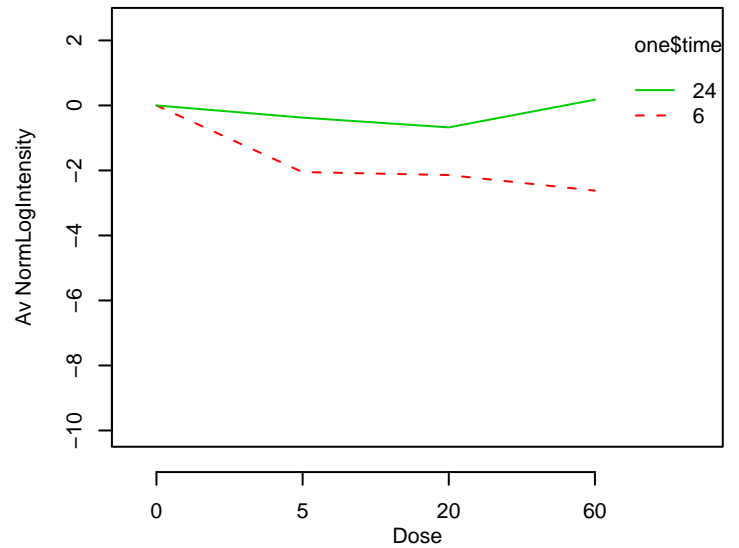

**GO\_0030808 : regulation of nucleotide biosynthesis**

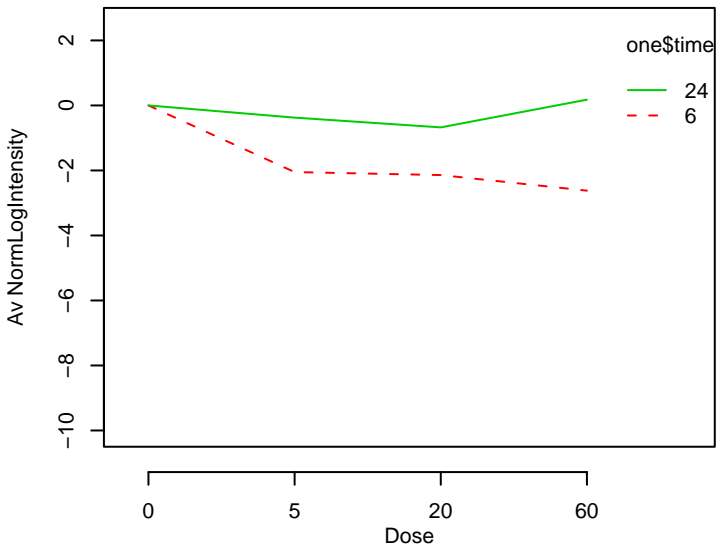

**GO\_0030814 : regulation of cAMP metabolism**

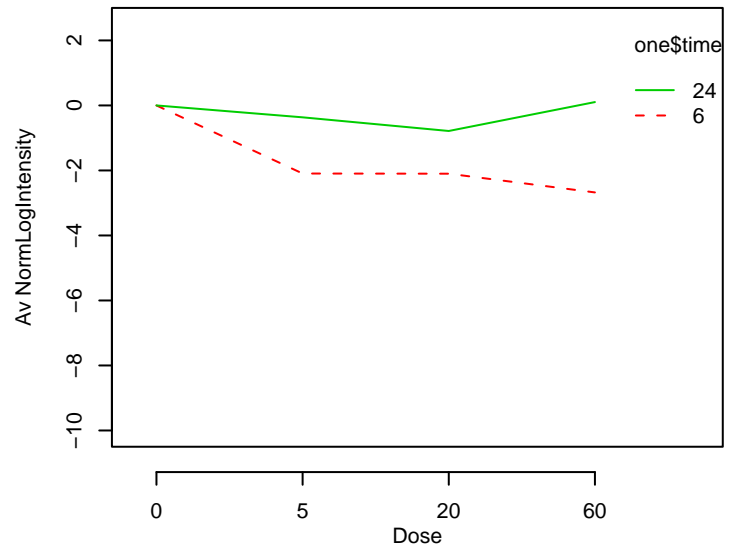

**GO\_0030817 : regulation of cAMP biosynthesis**

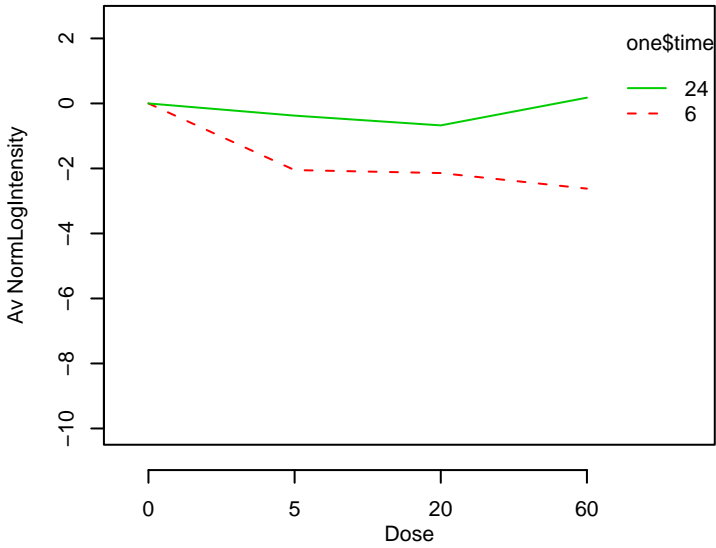

**GO\_0030832 : regulation of actin filament length**

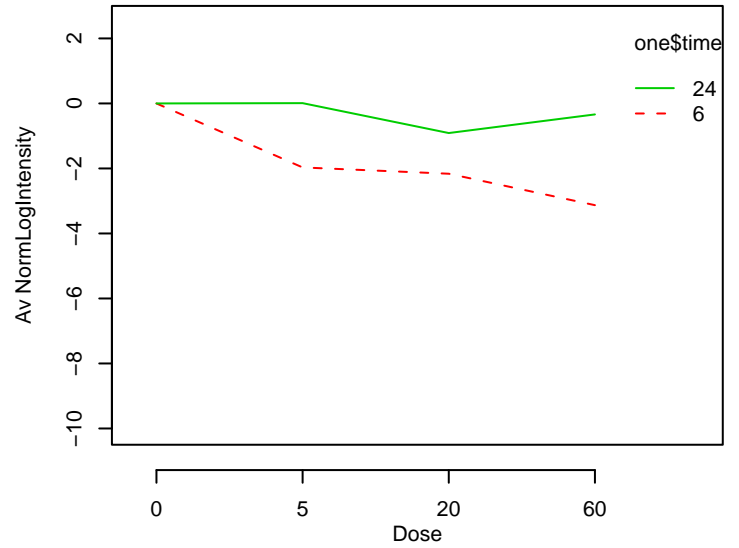

**GO\_0030833 : regulation of actin filament polymerization**

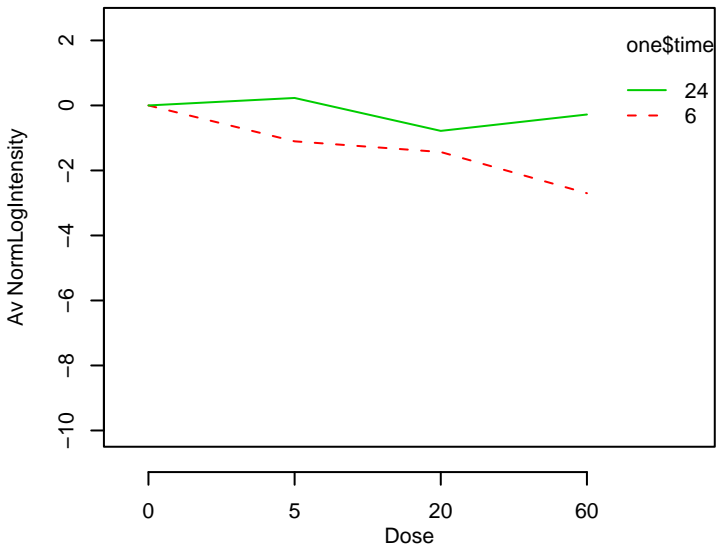

**GO\_0030834 : regulation of actin filament depolymerization**

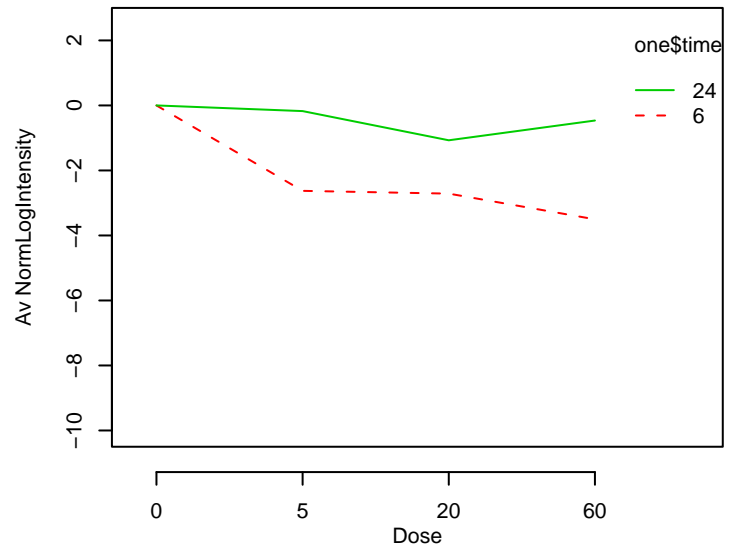

**GO\_0030835 : negative regulation of actin filament depolymerization**    **GO\_0030838 : positive regulation of actin filament polymerization**

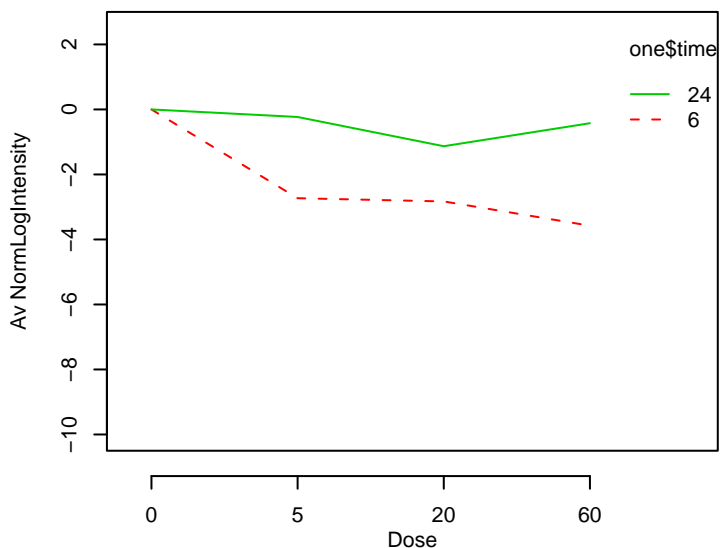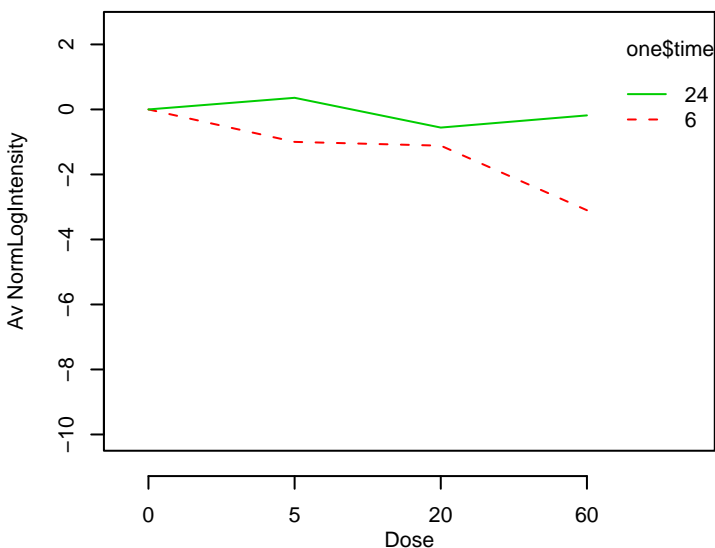

**GO\_0030851 : granulocyte differentiation**

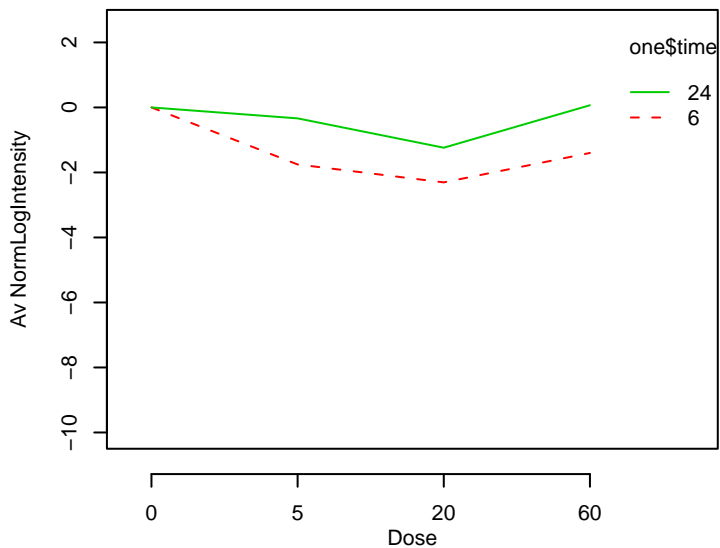

**GO\_0030855 : epithelial cell differentiation**

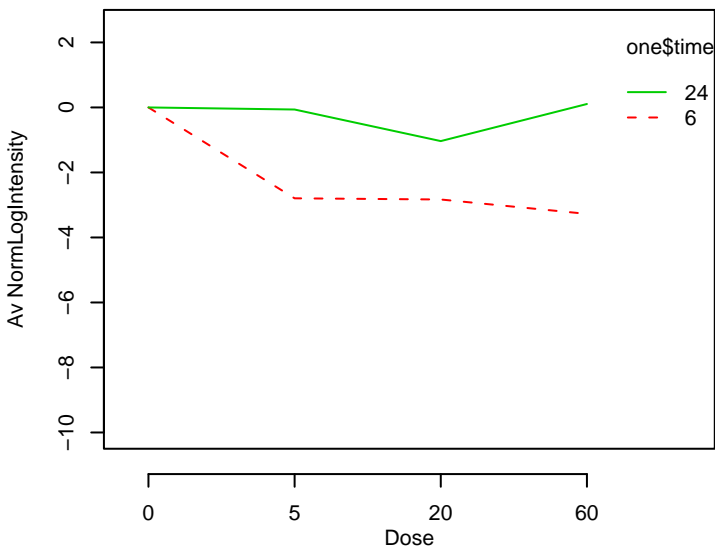

**GO\_0030856 : regulation of epithelial cell differentiation**    **GO\_0030865 : cortical cytoskeleton organization and biogenesis**

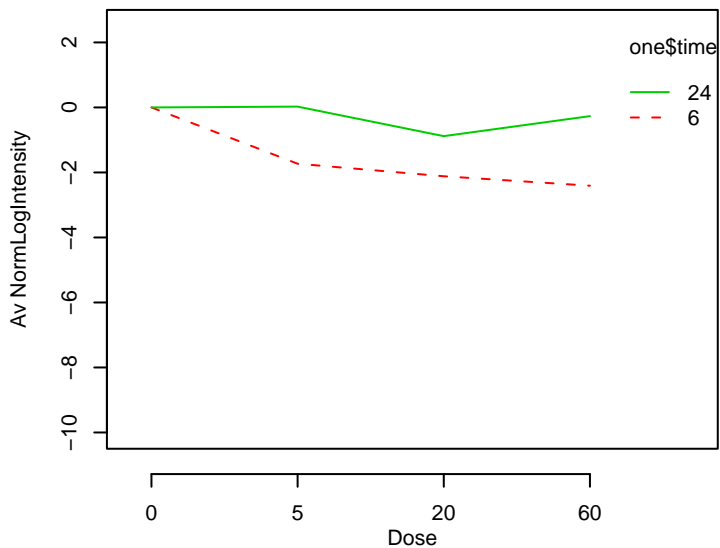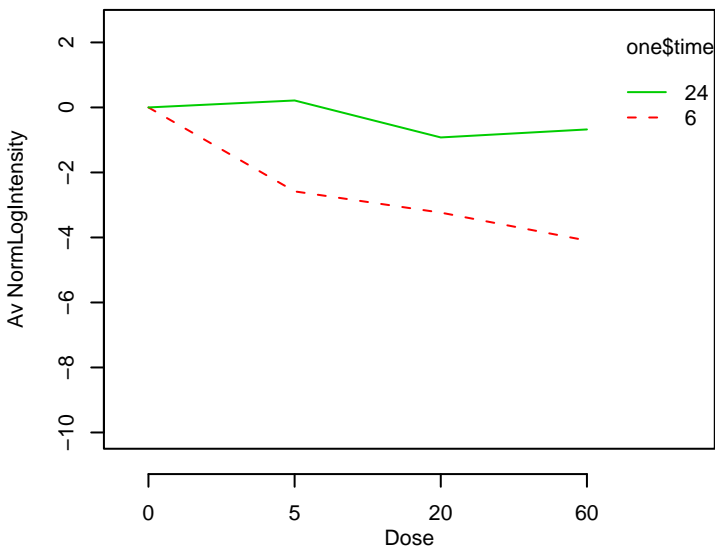



**GO\_0030866 : cortical actin cytoskeleton organization and bi**

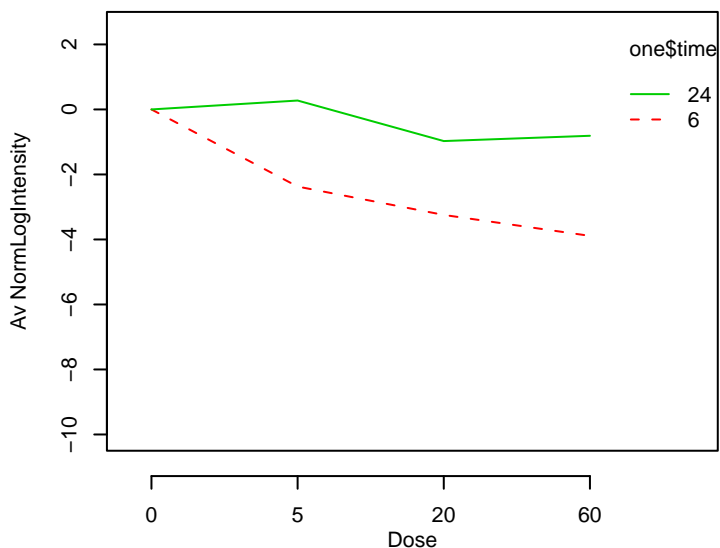

**GO\_0030879 : mammary gland development**

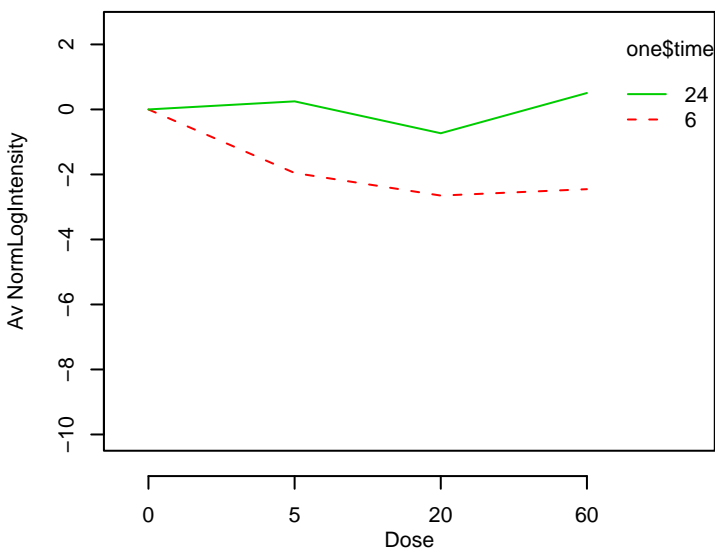

**GO\_0030888 : regulation of B cell proliferation**

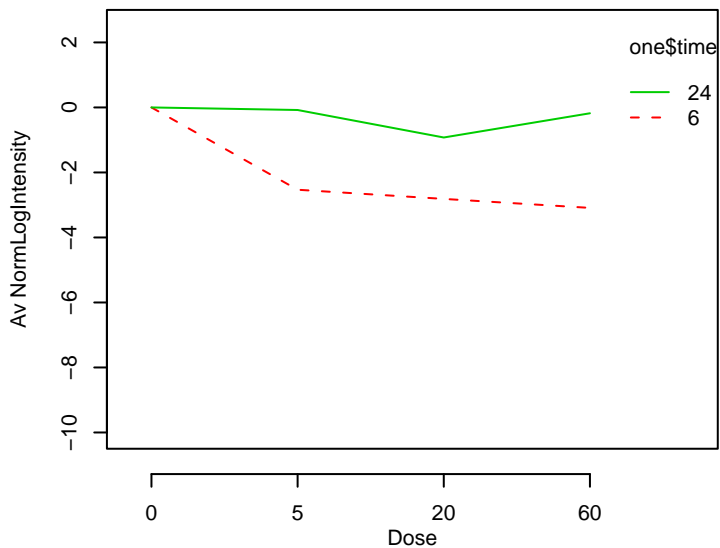

**GO\_0030890 : positive regulation of B cell proliferation**

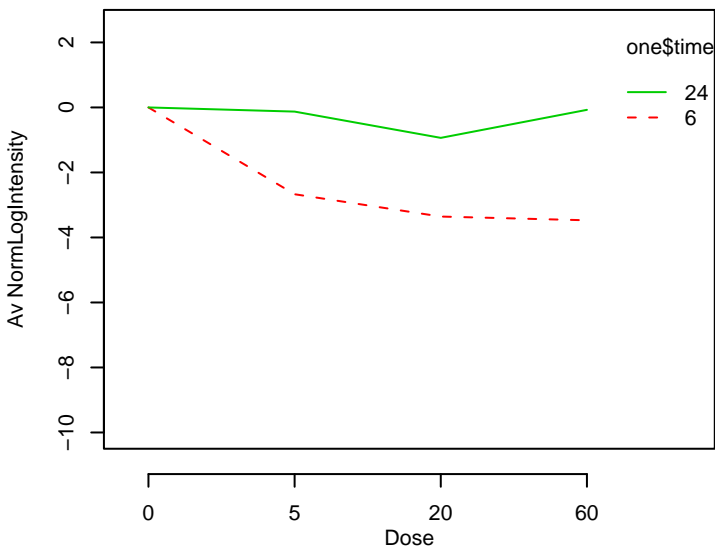

**GO\_0030900 : forebrain development**

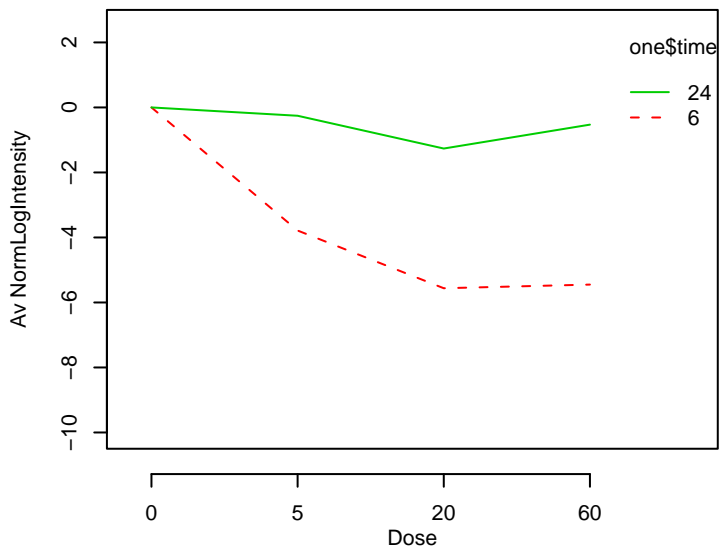

**GO\_0030901 : midbrain development**

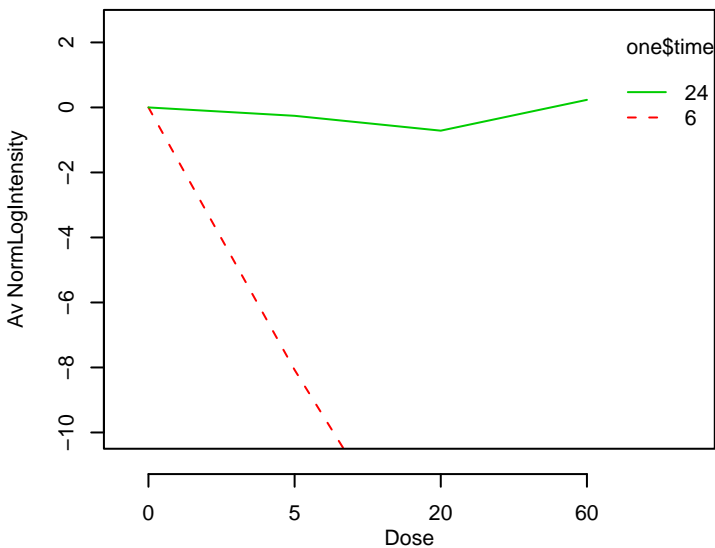

**GO\_0030902 : hindbrain development**

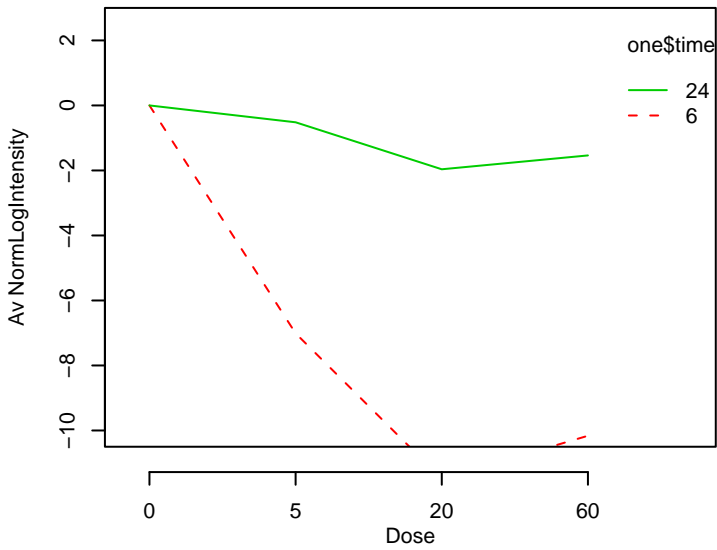

**GO\_0030968 : unfolded protein response**

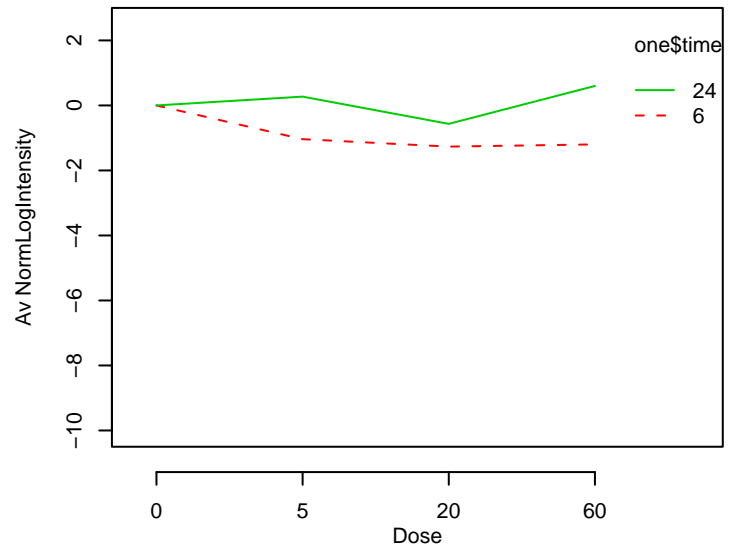

**GO\_0031016 : pancreas development**

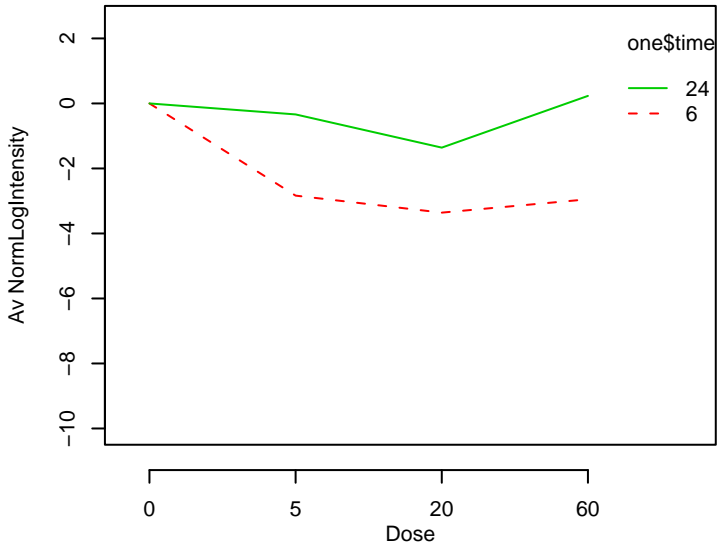

**GO\_0031023 : microtubule organizing center organization and**

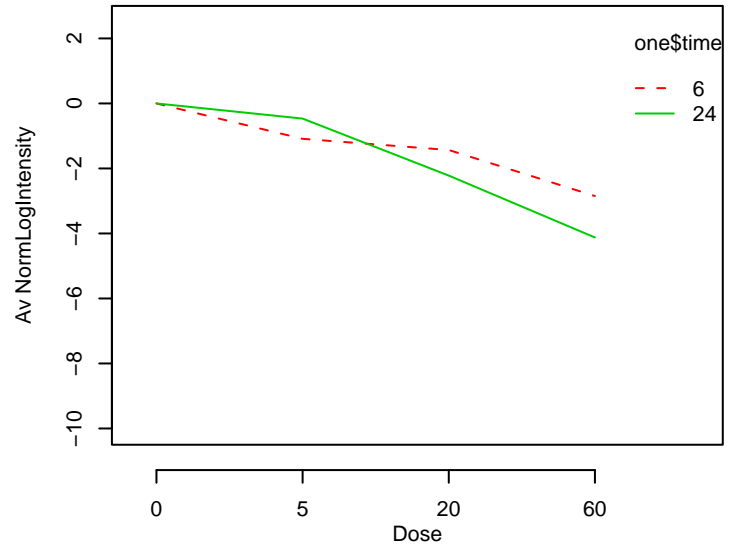

**GO\_0031032 : actomyosin structure organization and biogen**

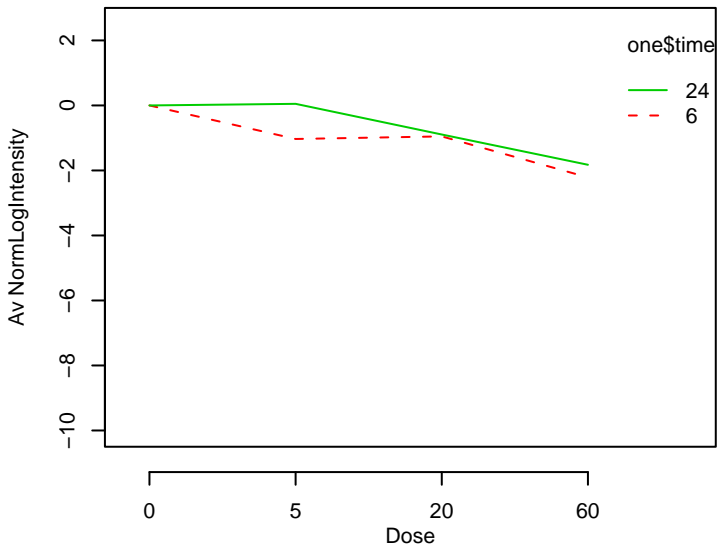

**GO\_0031069 : hair follicle morphogenesis**

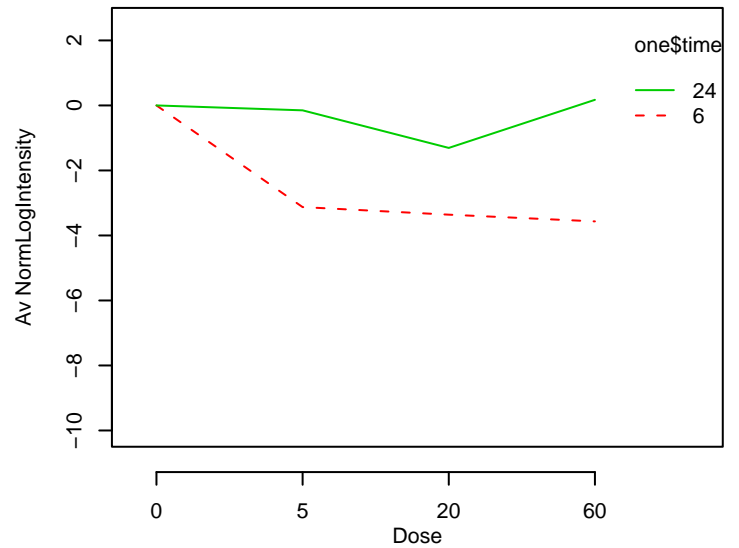

GO\_0031098 : stress-activated protein kinase signaling path

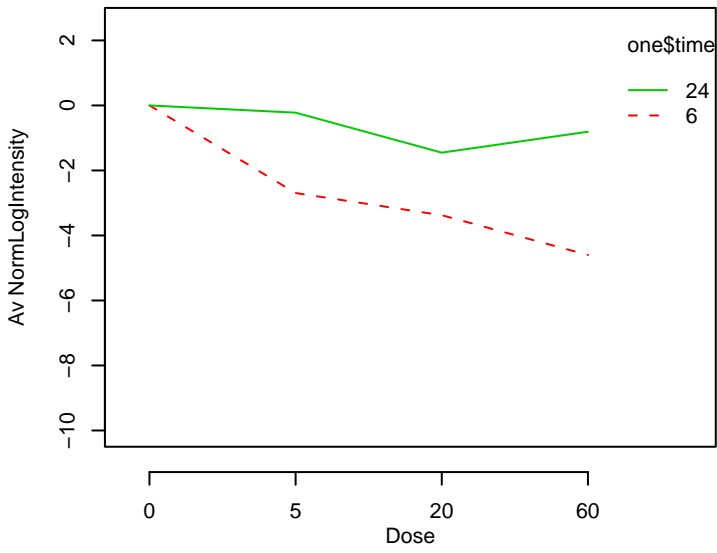

GO\_0031099 : regeneration

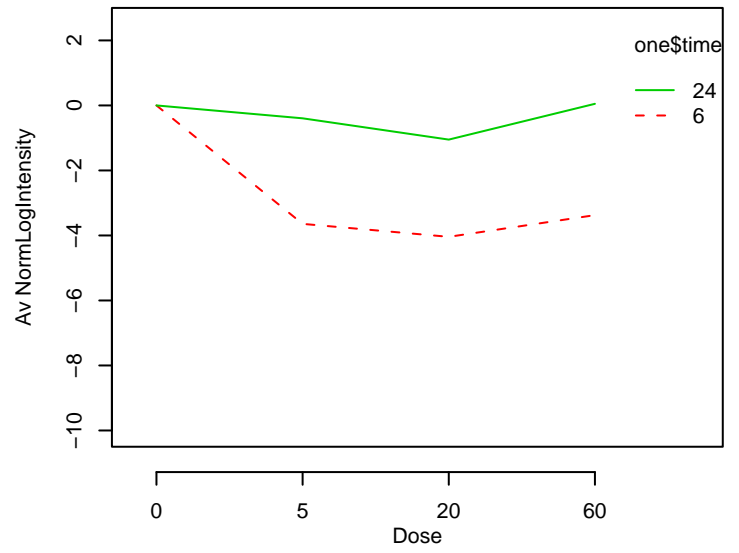

GO\_0031109 : microtubule polymerization or depolymerization GO\_0031110 : regulation of microtubule polymerization or de

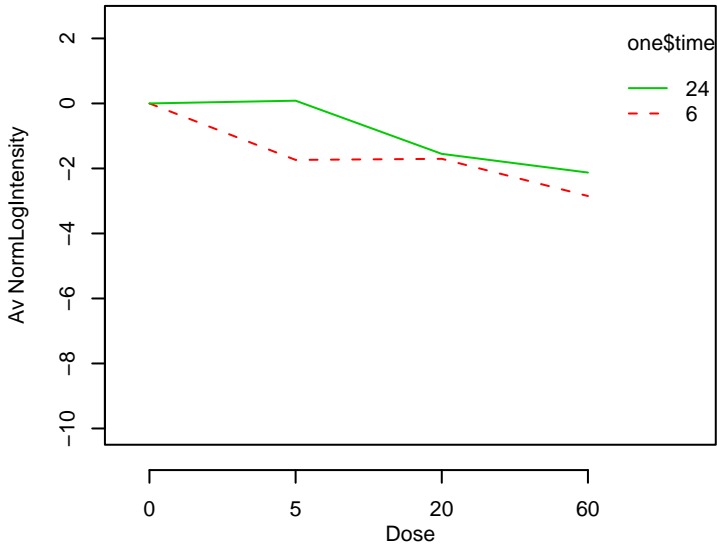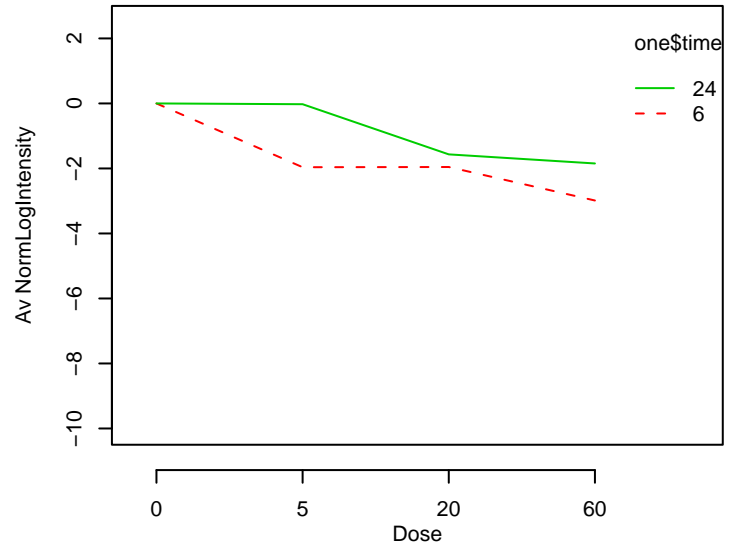

GO\_0031111 : negative regulation of microtubule polymeriza

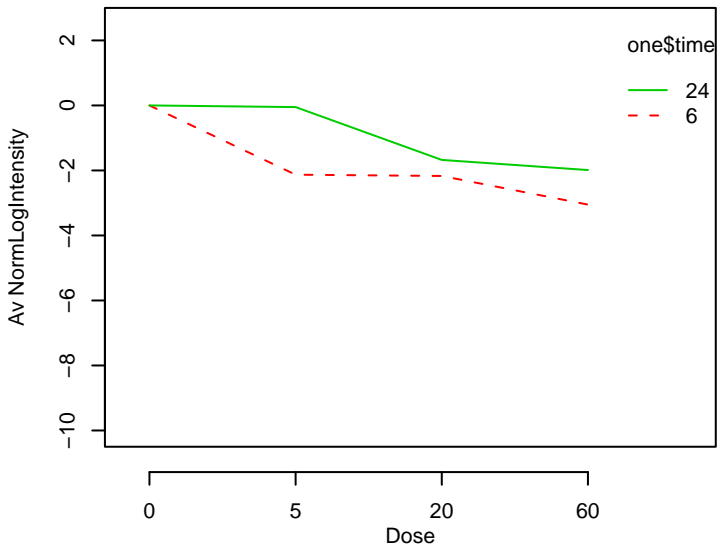

GO\_0031114 : regulation of microtubule depolymerization

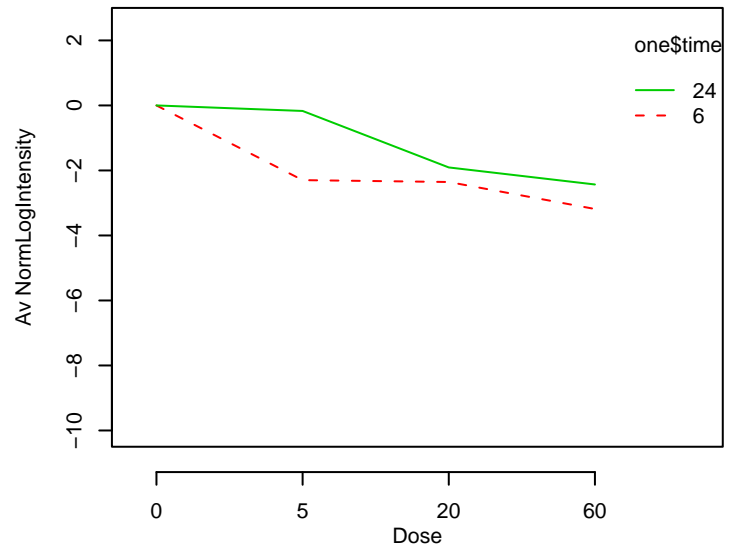

**GO\_0031123 : RNA 3'-end processing**

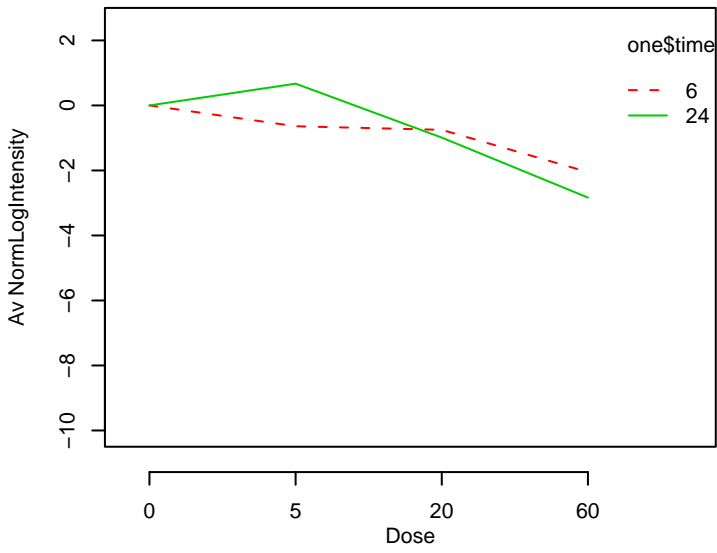

**GO\_0031124 : mRNA 3'-end processing**

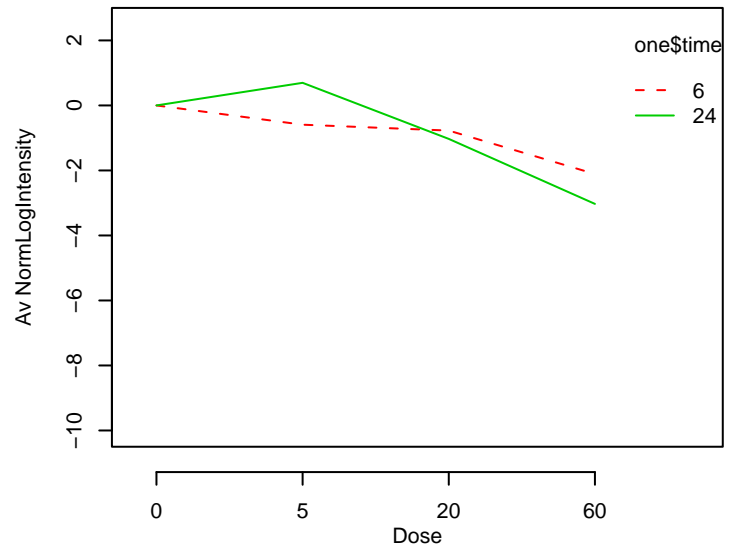

**GO\_0031128 : induction**

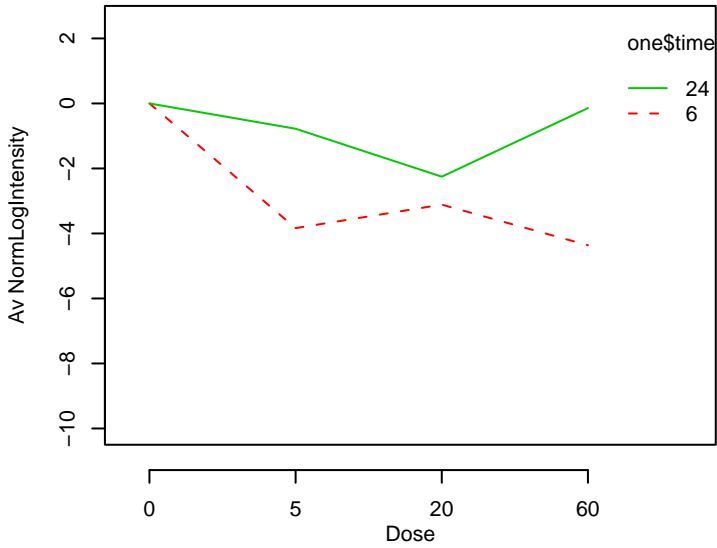

**GO\_0031175 : neurite development**

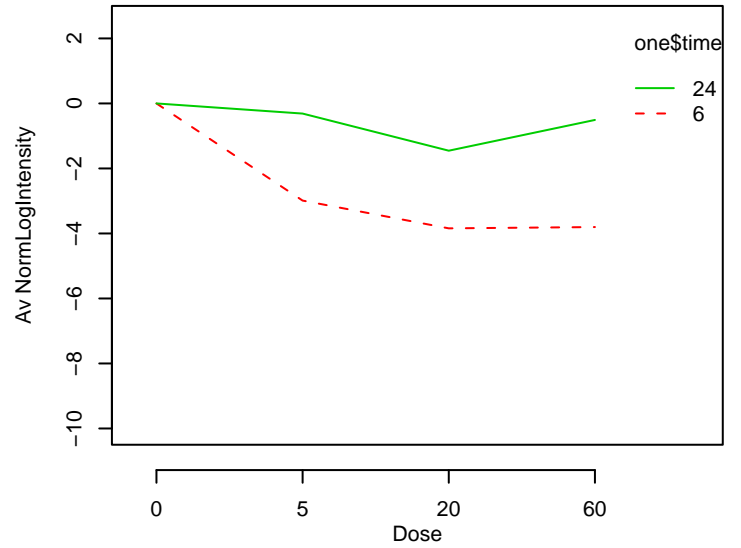

**GO\_0031214 : biomineral formation**

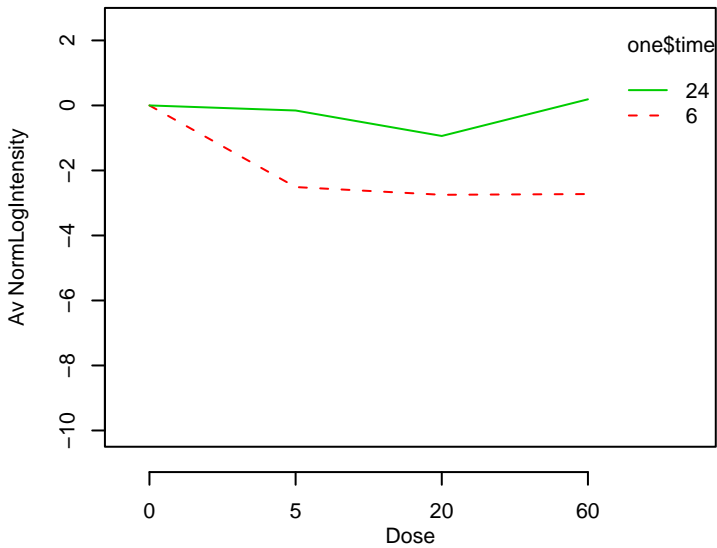

**GO\_0031268 : pseudopodium organization and biogenesis**

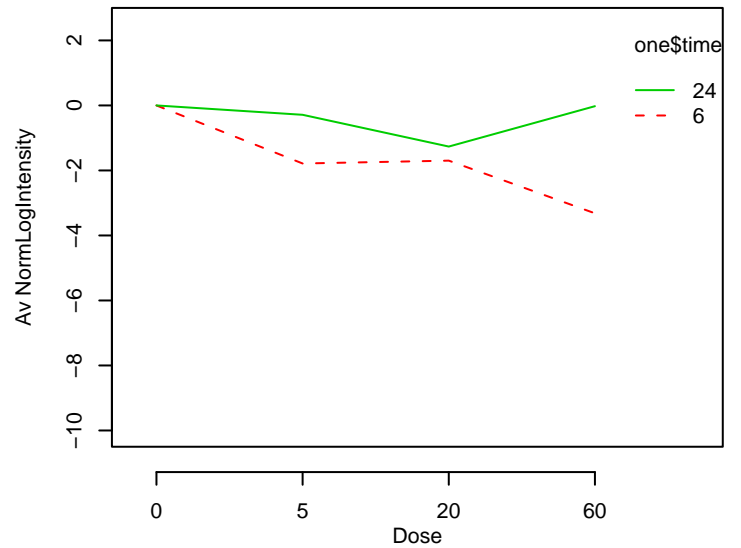

**GO\_0031269 : pseudopodium formation**

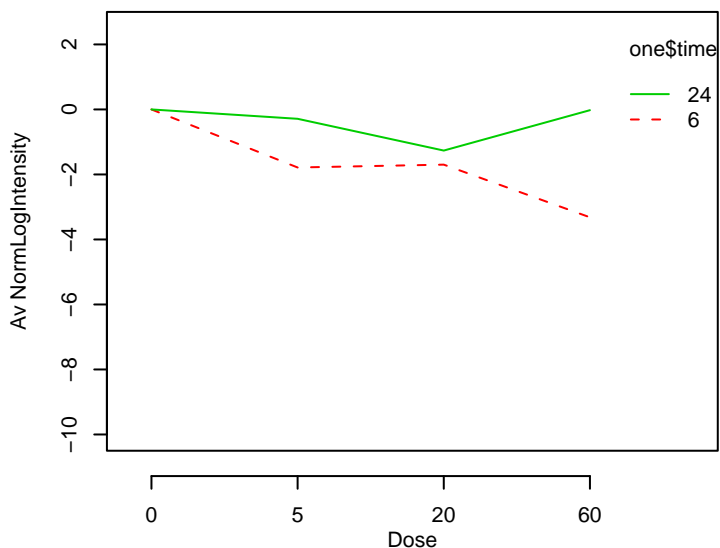

**GO\_0031272 : regulation of pseudopodium formation**

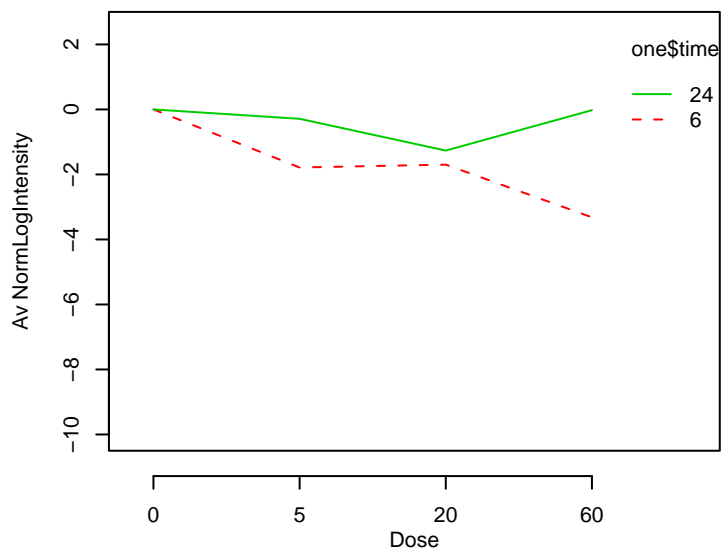

**GO\_0031274 : positive regulation of pseudopodium formati**

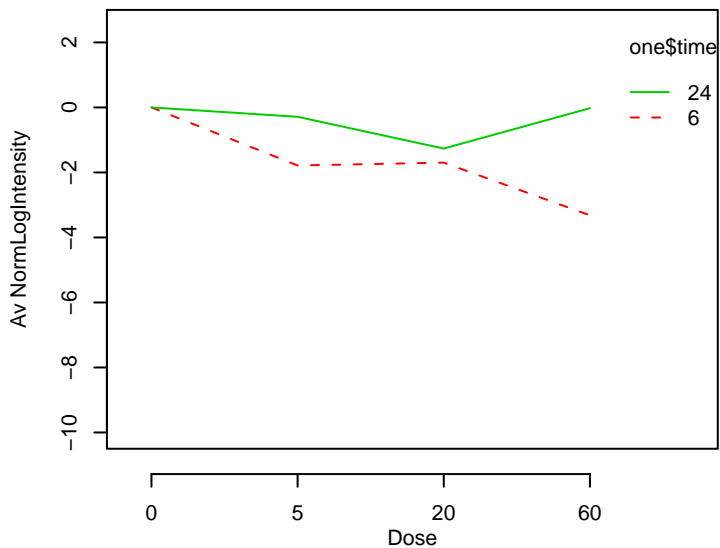

**GO\_0031279 : regulation of cyclase activity**

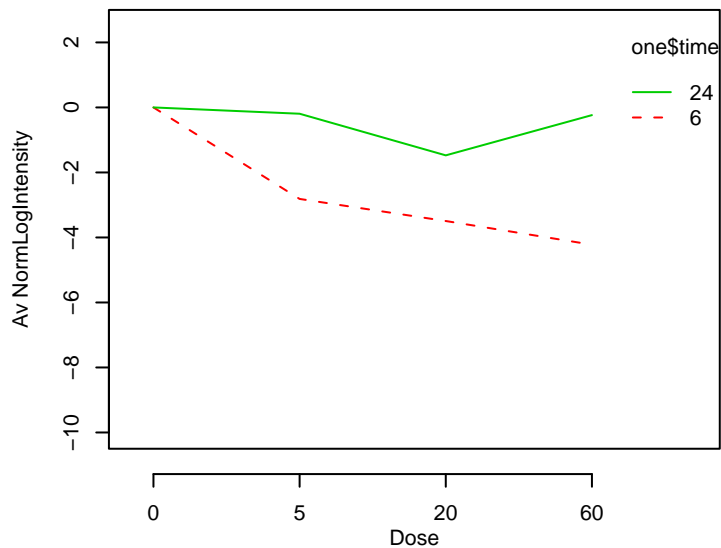

**GO\_0031280 : negative regulation of cyclase activity**

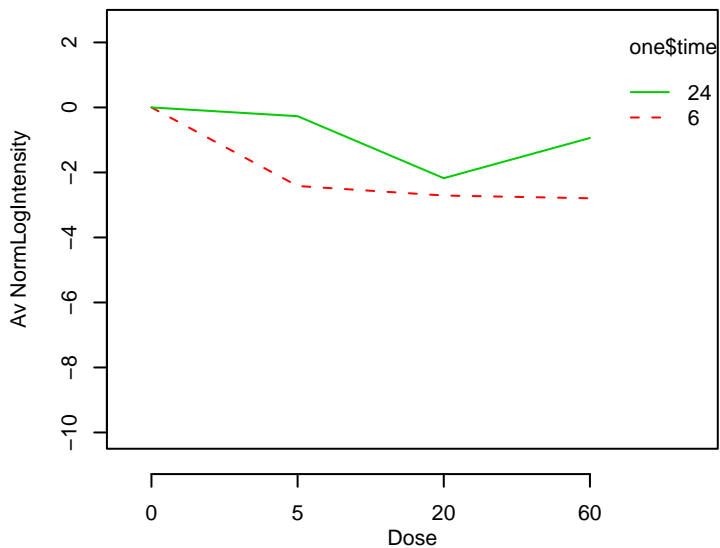

**GO\_0031281 : positive regulation of cyclase activity**

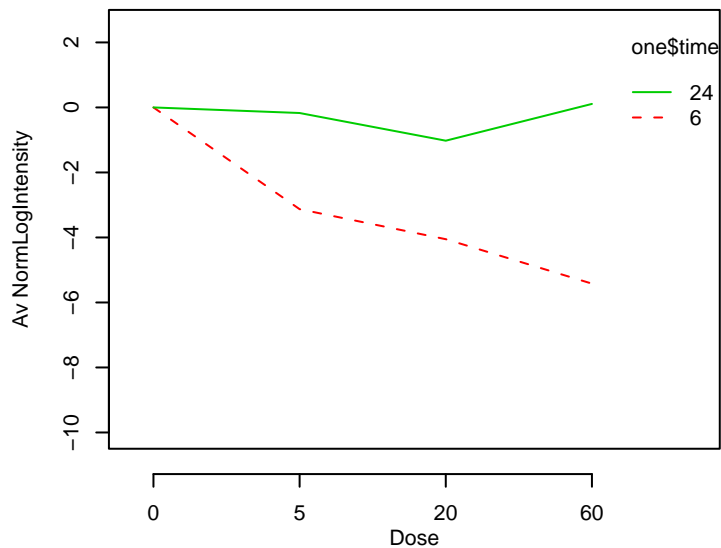

**GO\_0031326 : regulation of cellular biosynthesis**

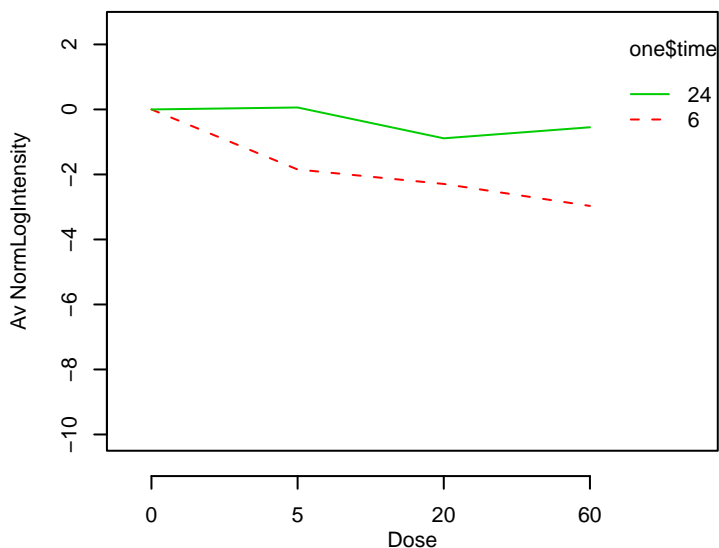

**GO\_0031327 : negative regulation of cellular biosynthesis**

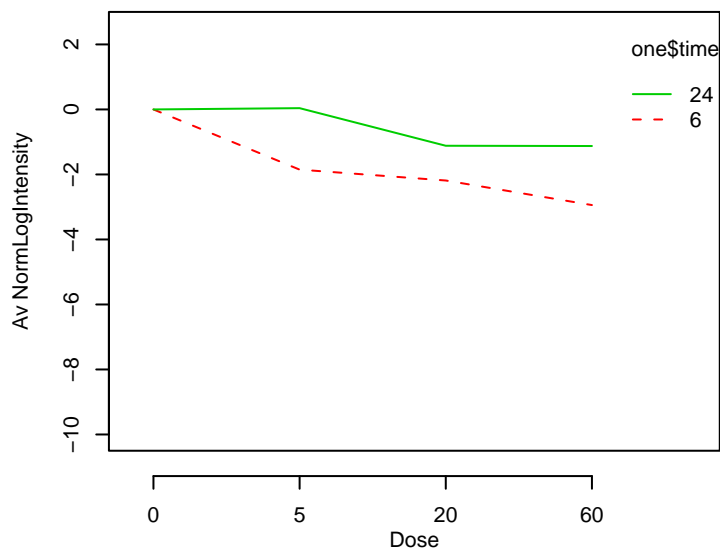

**GO\_0031328 : positive regulation of cellular biosynthesis** **GO\_0031344 : regulation of cell projection organization and**

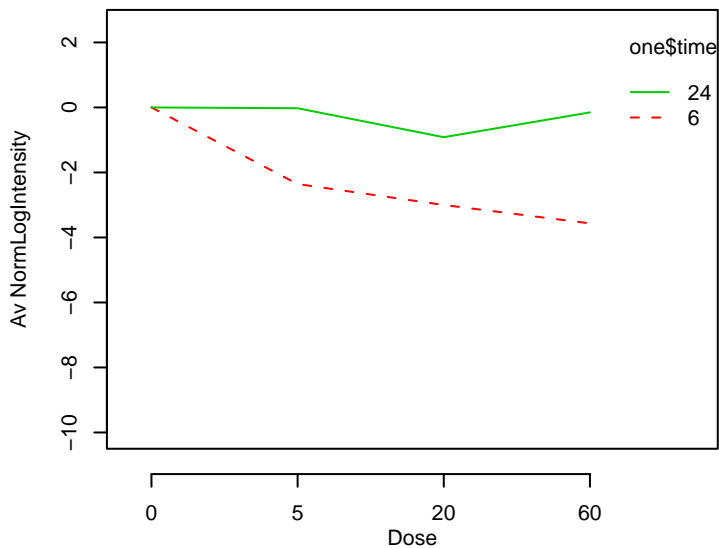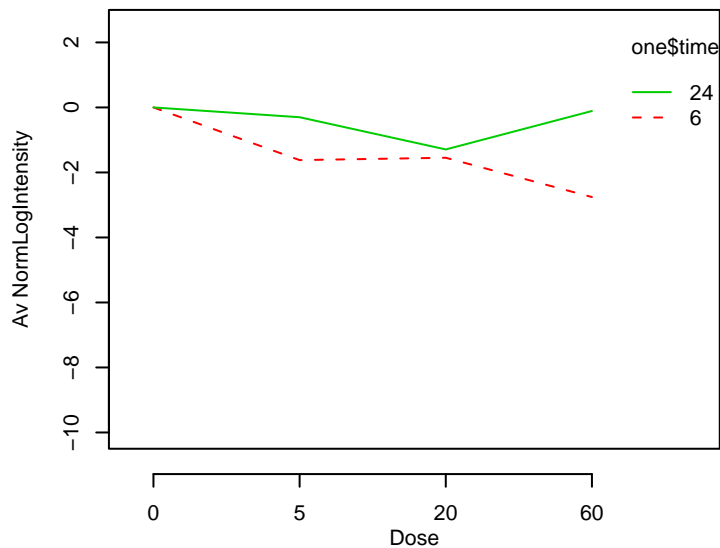

**GO\_0031346 : positive regulation of cell projection organiza**

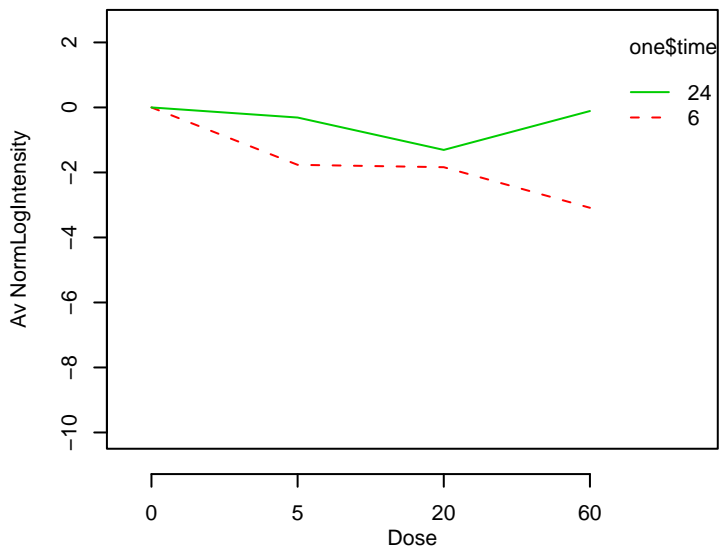

**GO\_0031365 : N-terminal protein amino acid modificator**

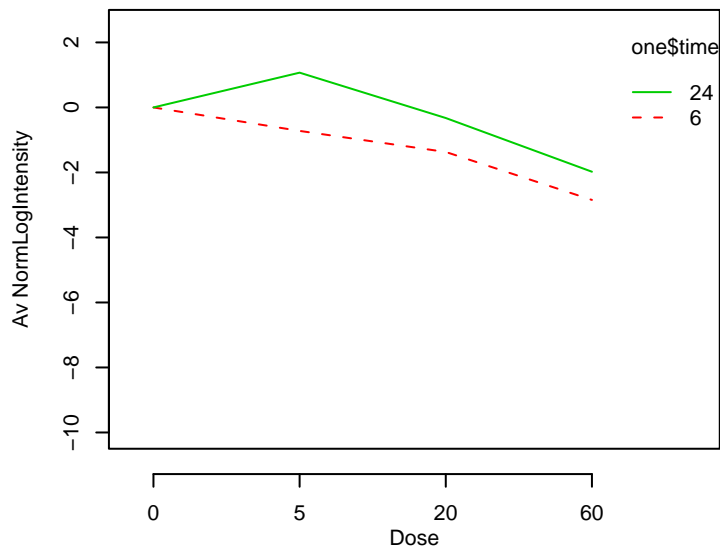

**GO\_0031424 : keratinization**

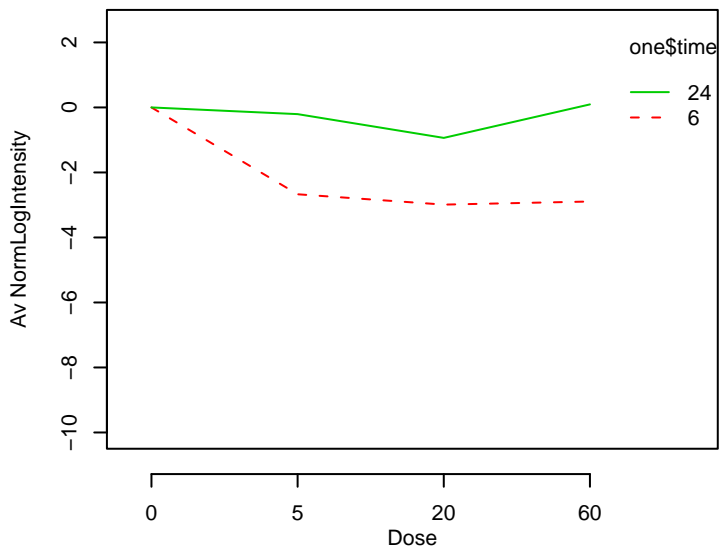

**GO\_0031497 : chromatin assembly**

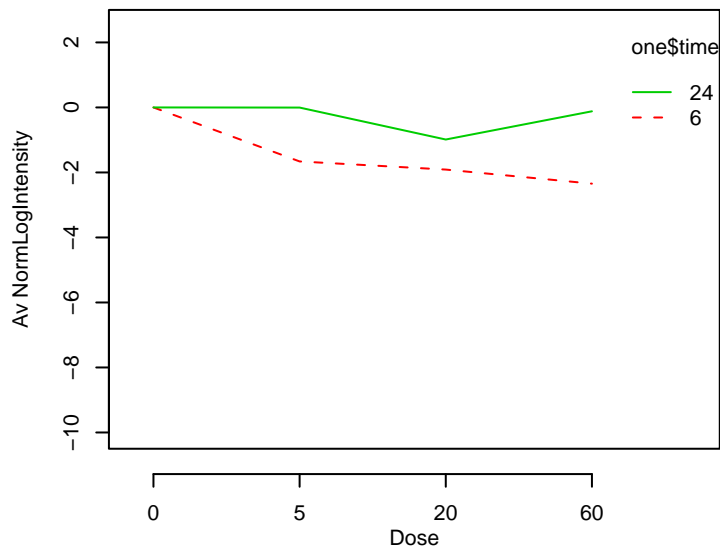

**GO\_0031498 : chromatin disassembly**

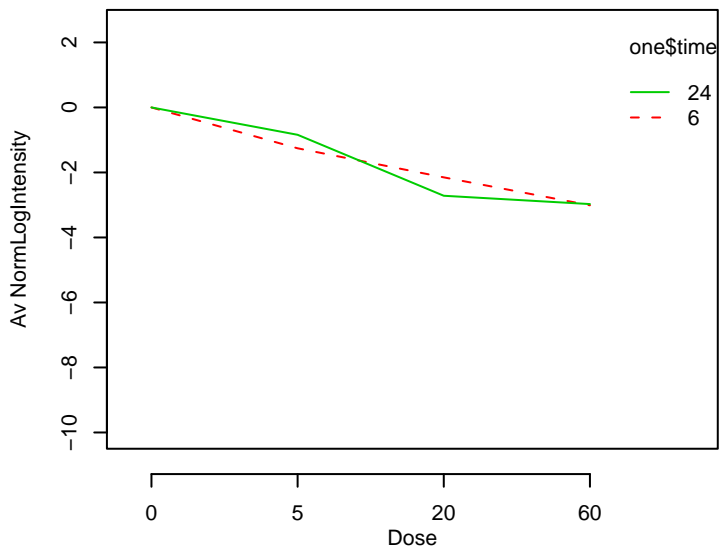

**GO\_0031507 : heterochromatin formation**

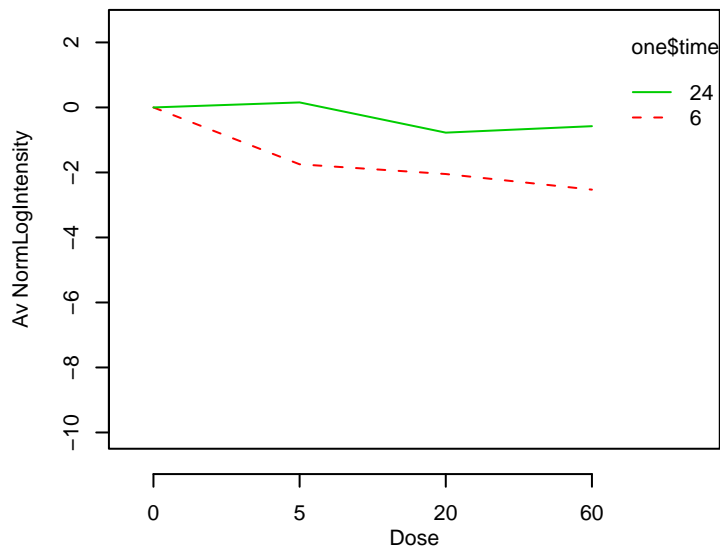

**GO\_0031532 : actin cytoskeleton reorganization**

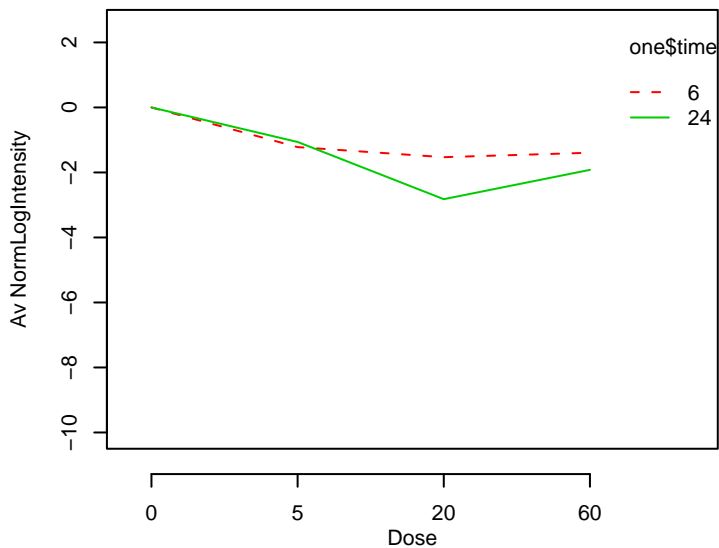

**GO\_0031570 : DNA integrity checkpoint**

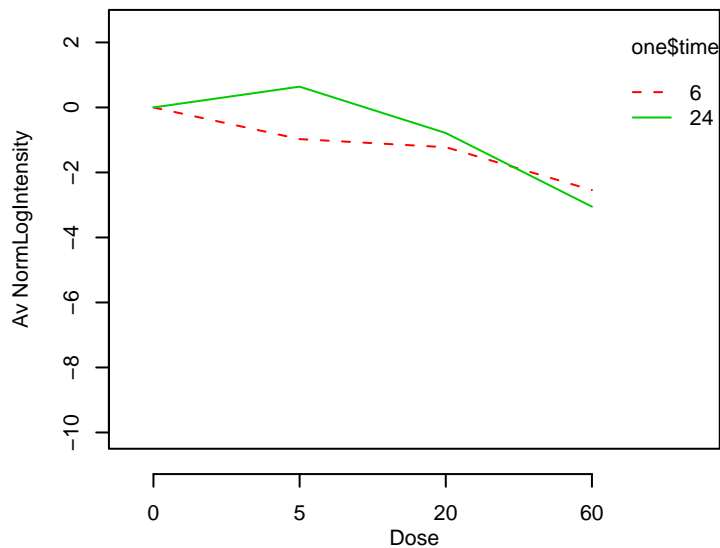

**GO\_0031571 : G1 DNA damage checkpoint**

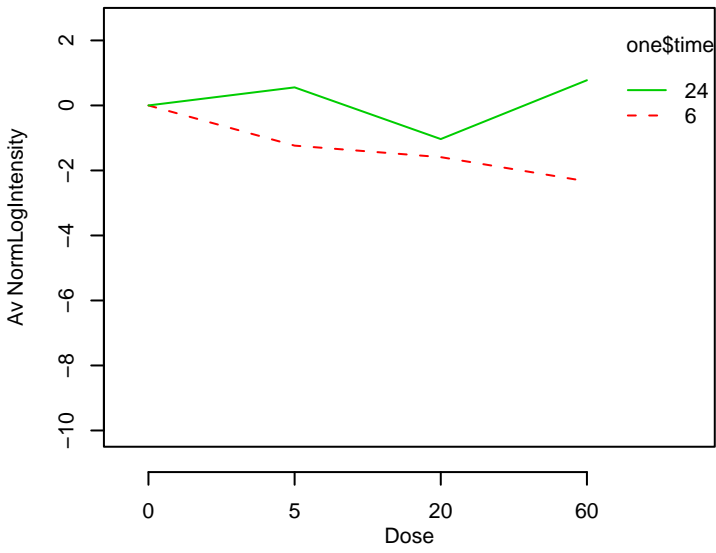

**GO\_0031572 : G2/M transition DNA damage checkpoint**

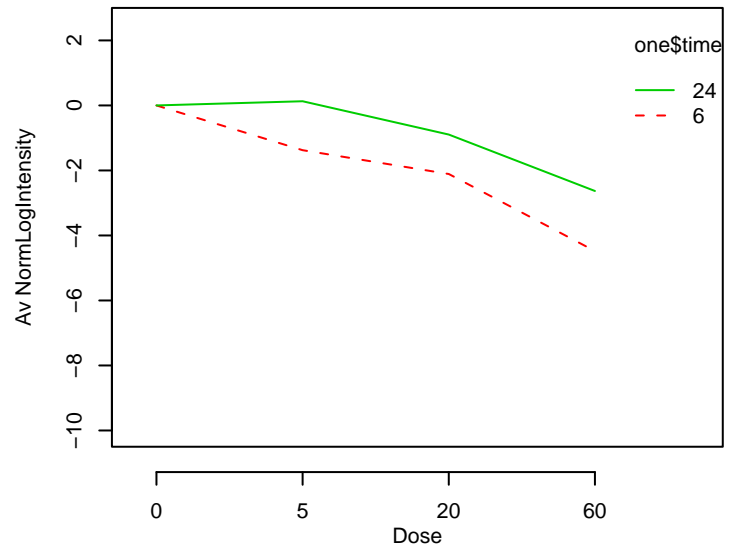

**GO\_0031576 : G2/M transition checkpoint**

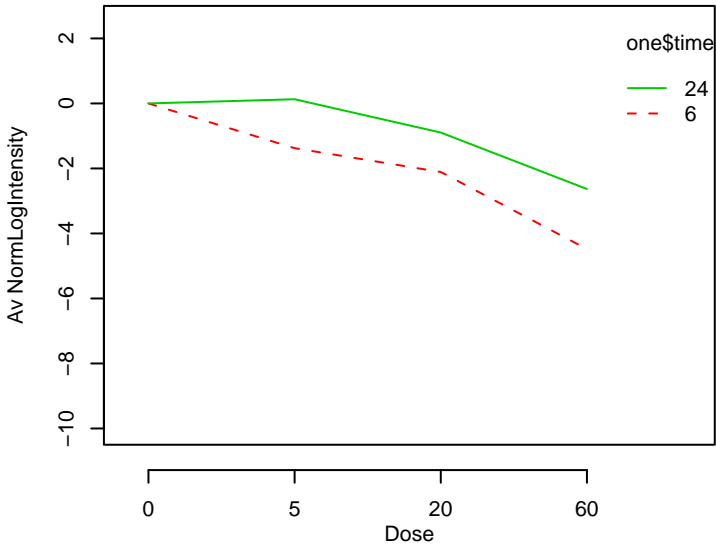

**GO\_0031577 : spindle checkpoint**

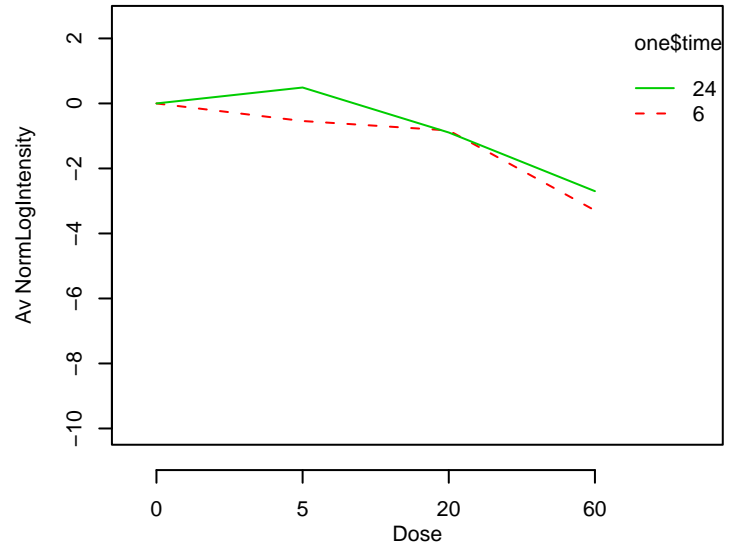

**GO\_0031589 : cell-substrate adhesion**

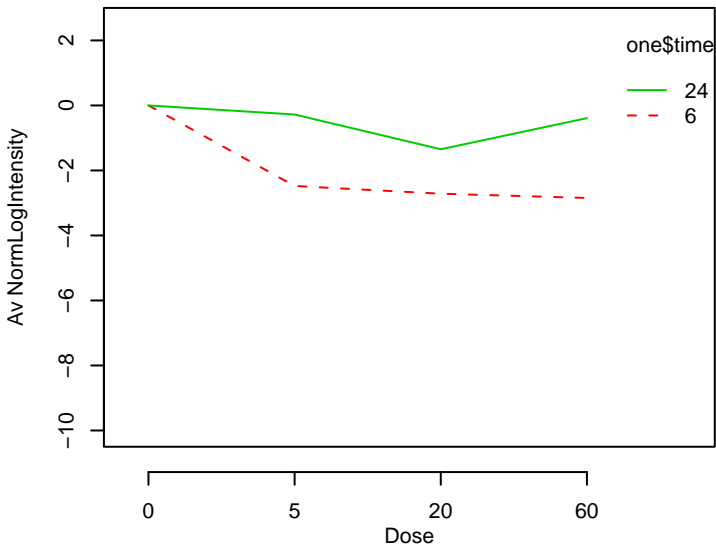

**GO\_0031644 : regulation of neurophysiological process**

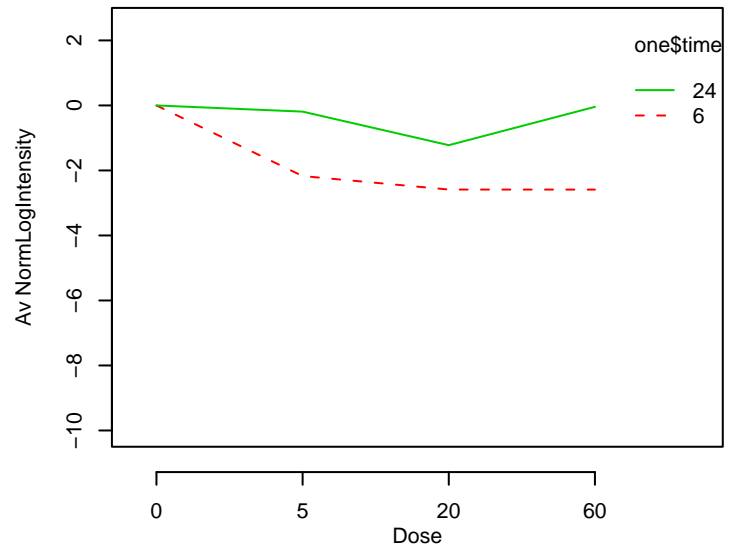



**GO\_0031647 : regulation of protein stability**

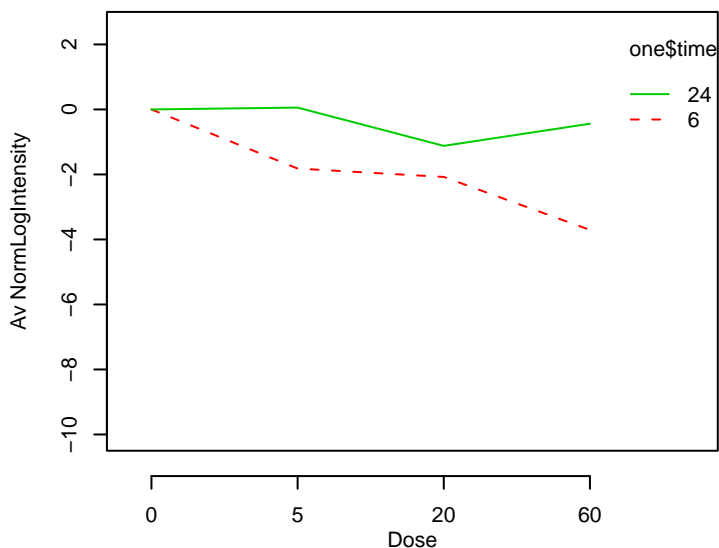

**GO\_0031649 : heat generation**

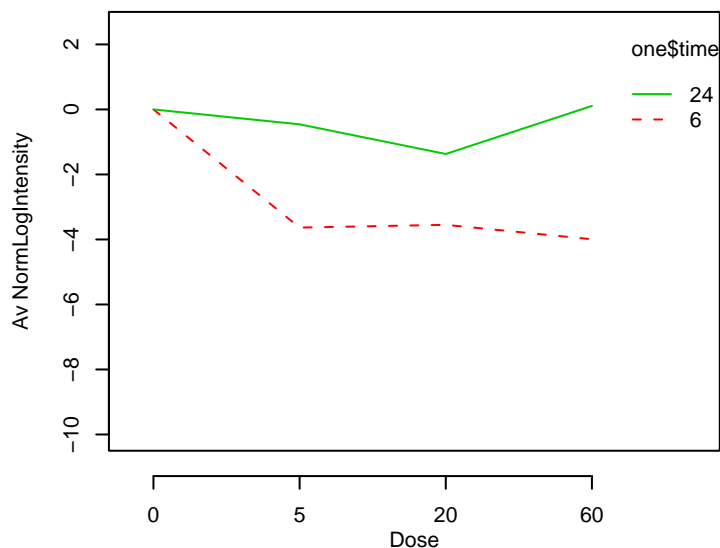

**GO\_0031667 : response to nutrient levels**

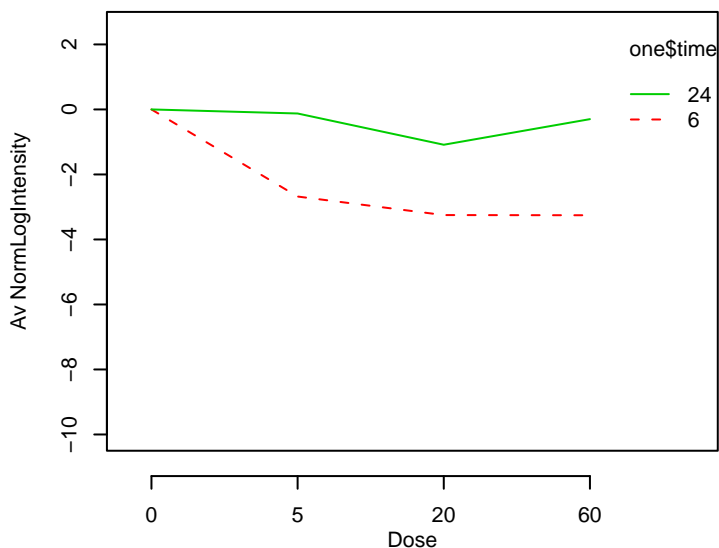

**GO\_0031668 : cellular response to extracellular stimulus**

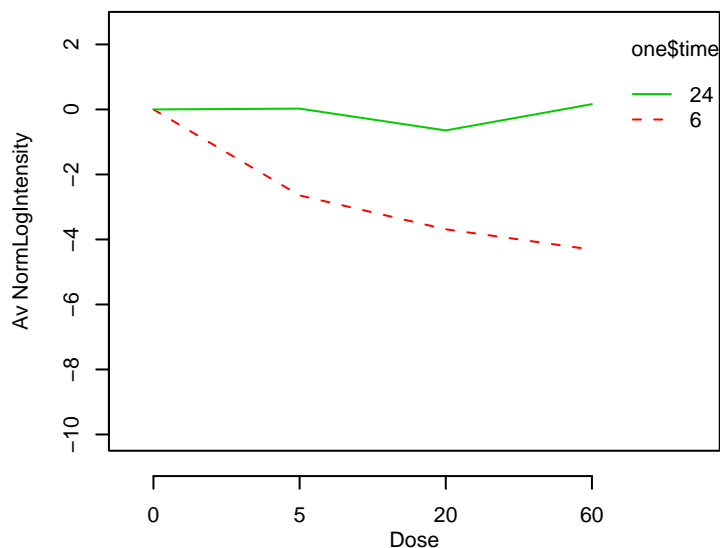

**GO\_0031669 : cellular response to nutrient levels**

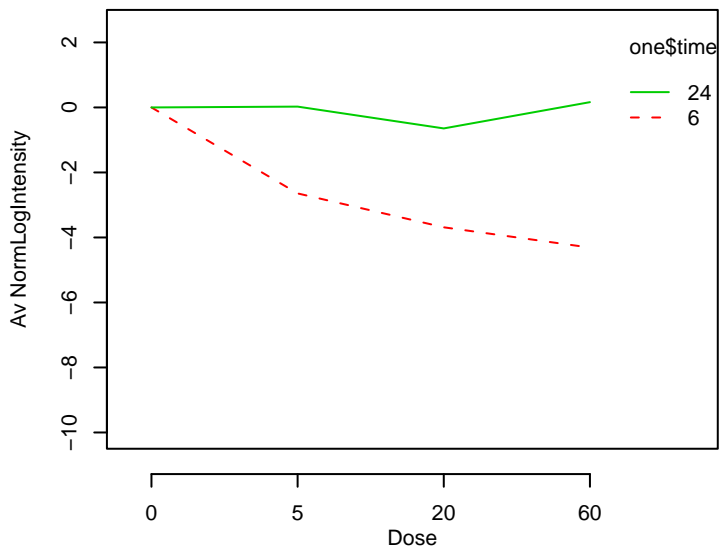

**GO\_0032011 : ARF protein signal transduction**

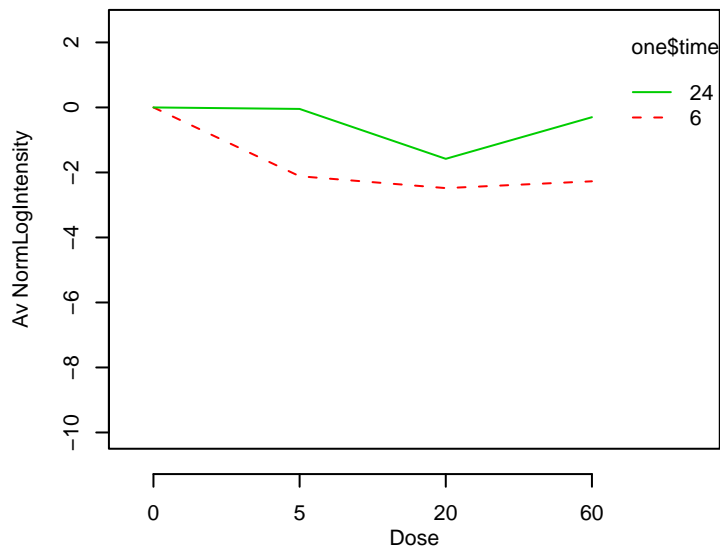

**GO\_0032012 : regulation of ARF protein signal transductio**

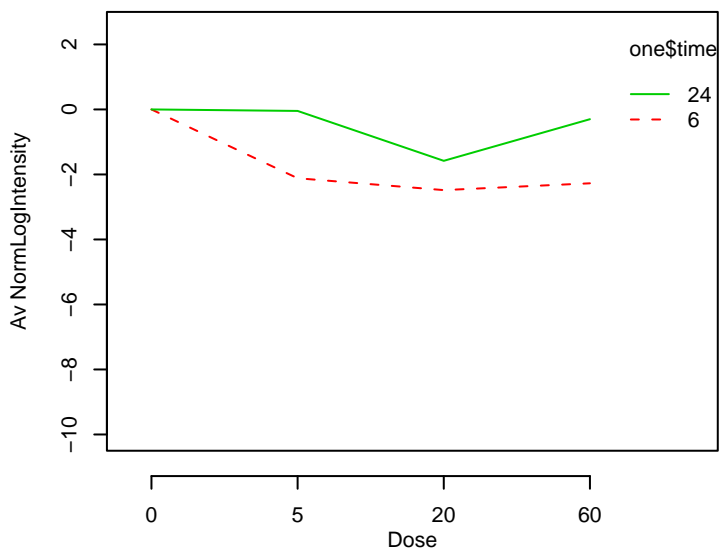

**GO\_0032147 : activation of protein kinase activity**

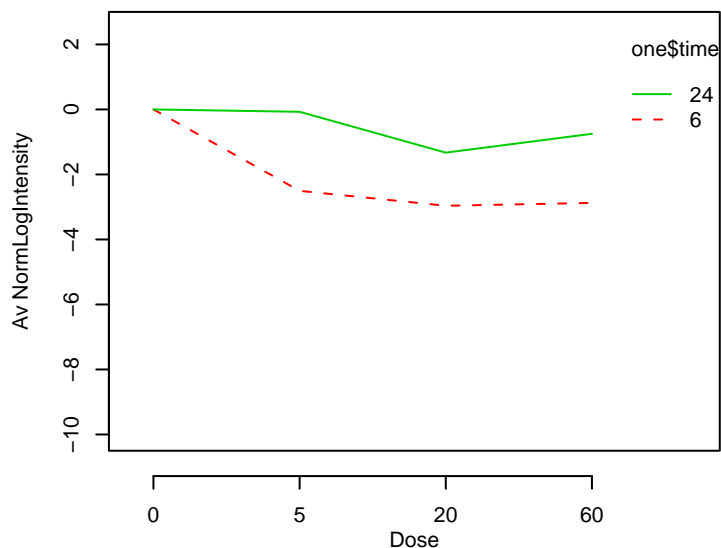

**GO\_0032200 : telomere organization and biogenesis**

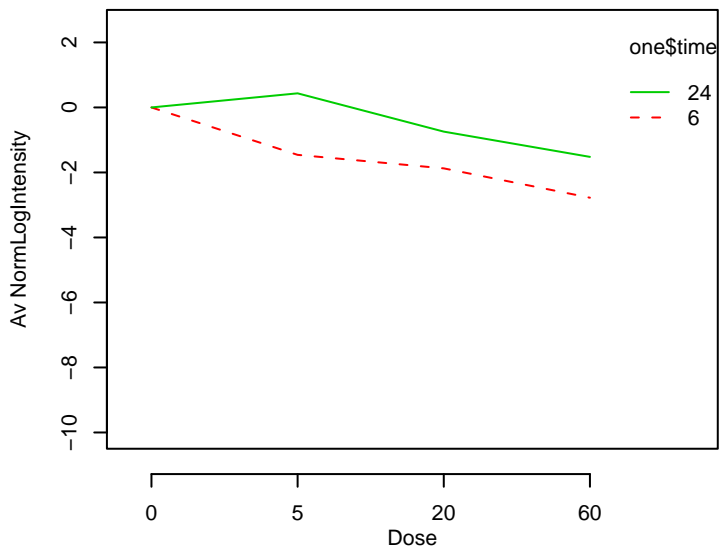

**GO\_0035023 : regulation of Rho protein signal transductio**

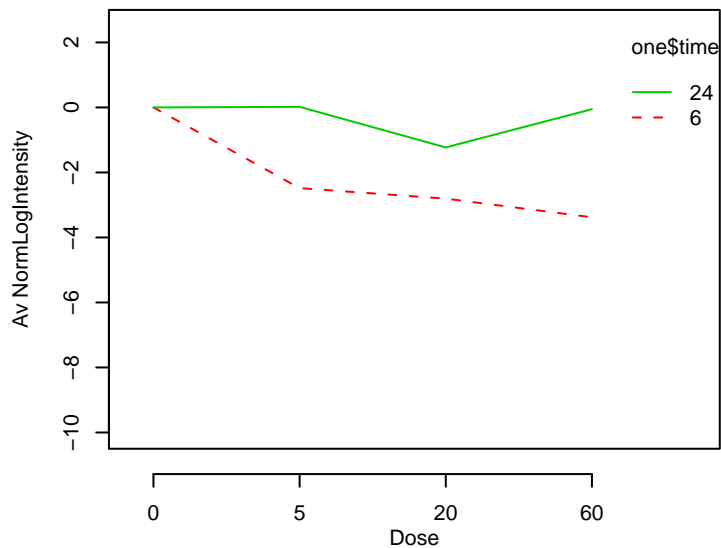

**GO\_0035036 : sperm-egg recognition**

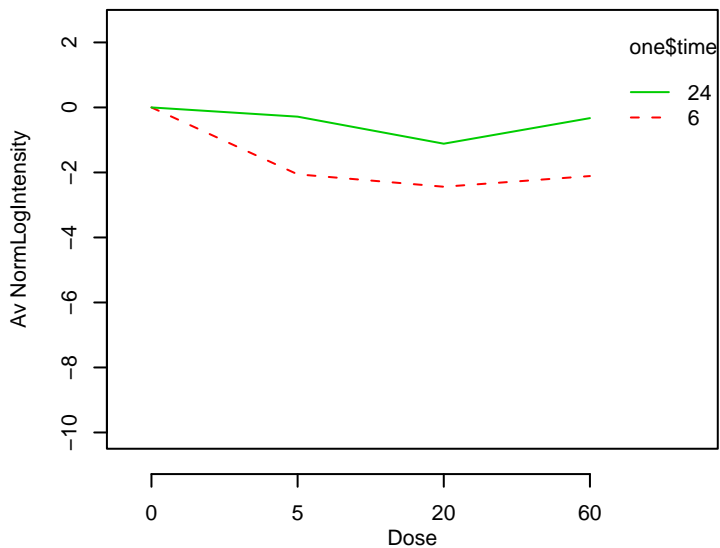

**GO\_0035050 : embryonic heart tube development**

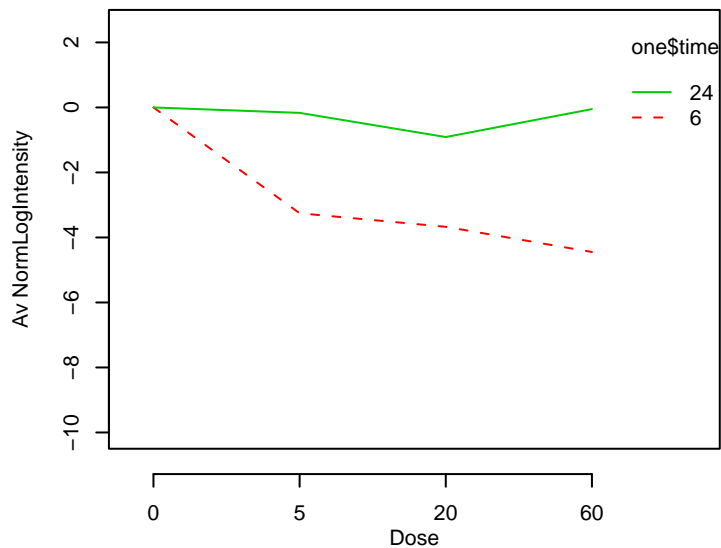

**GO\_0035051 : cardiac cell differentiation**

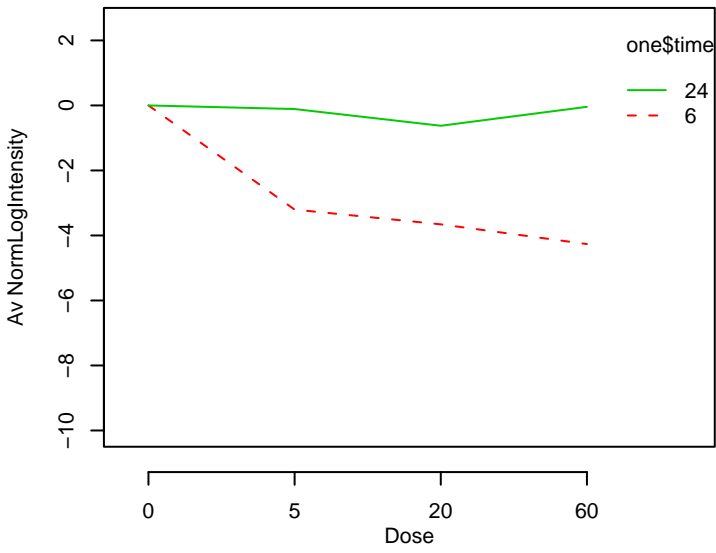

**GO\_0035058 : sensory cilium biogenesis**

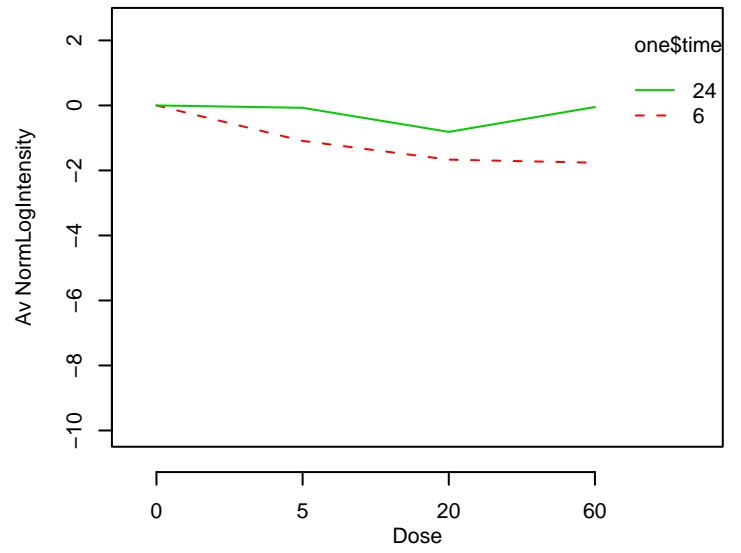

**GO\_0035088 : establishment and/or maintenance of apical/ba**

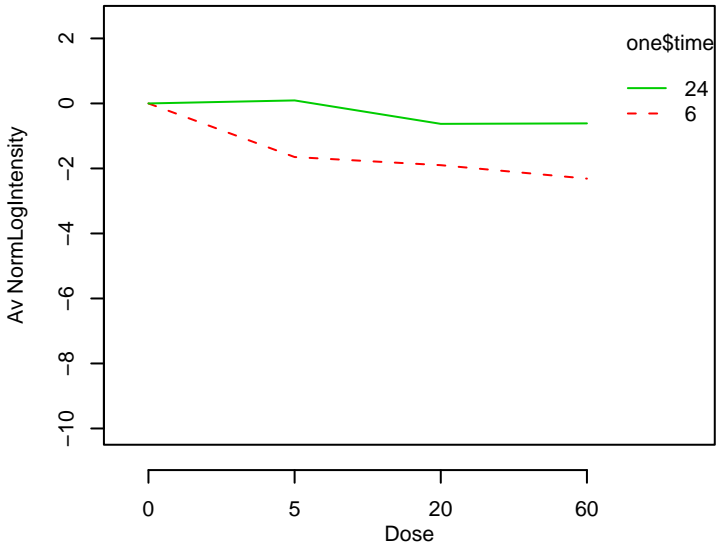

**GO\_0035107 : appendage morphogenesis**

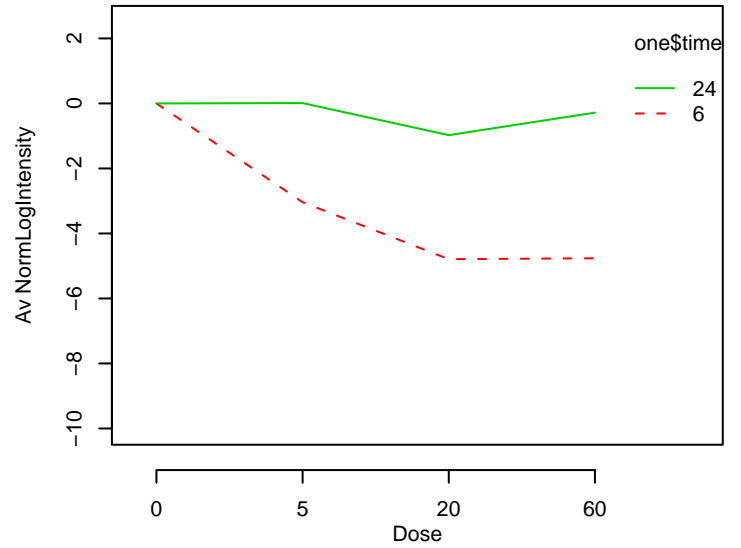

**GO\_0035108 : limb morphogenesis**

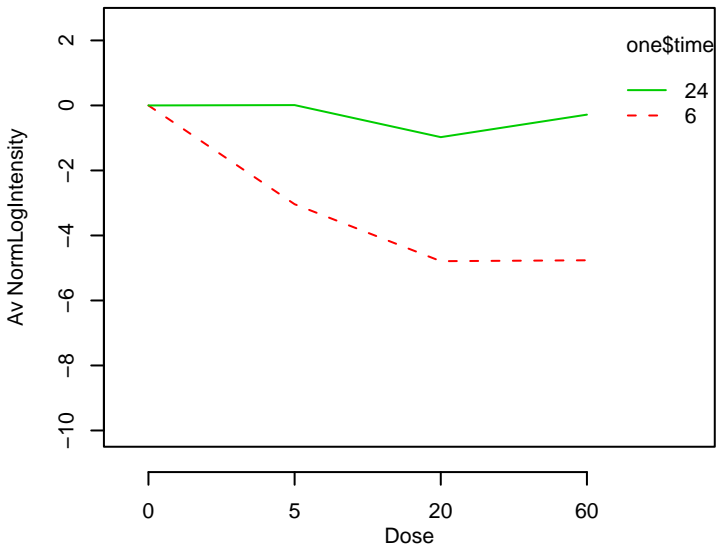

**GO\_0035113 : embryonic appendage morphogenesis**

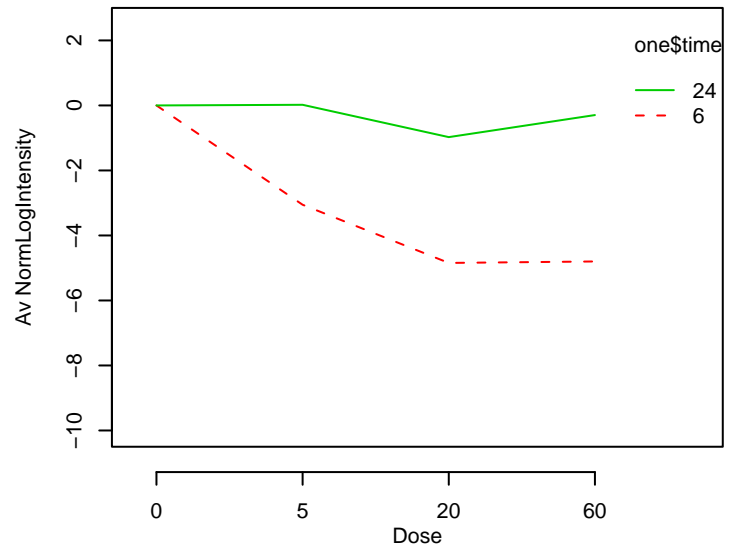

**GO\_0035115 : embryonic forelimb morphogenesis**

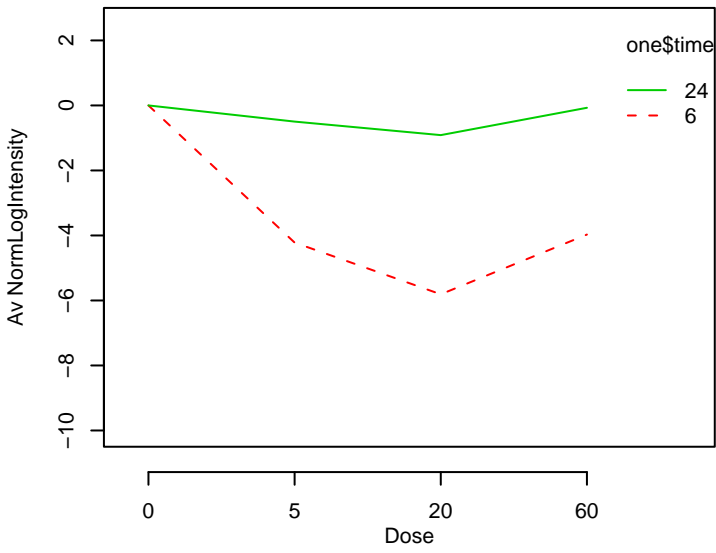

**GO\_0035116 : embryonic hindlimb morphogenesis**

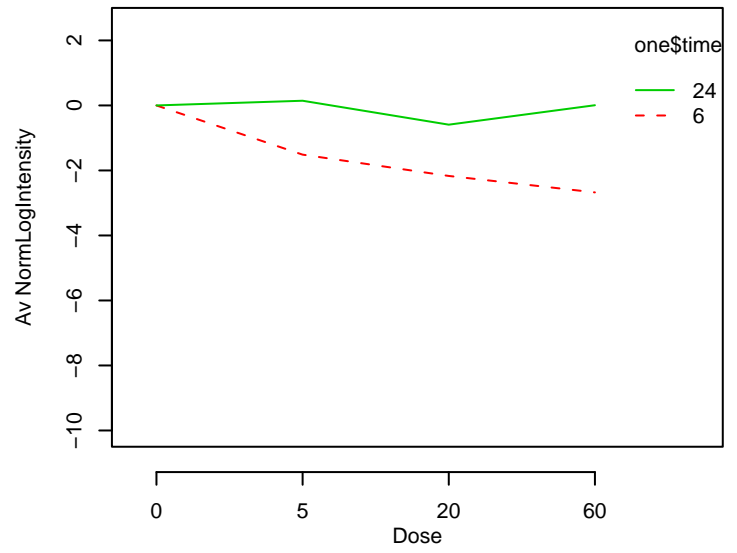

**GO\_0035136 : forelimb morphogenesis**

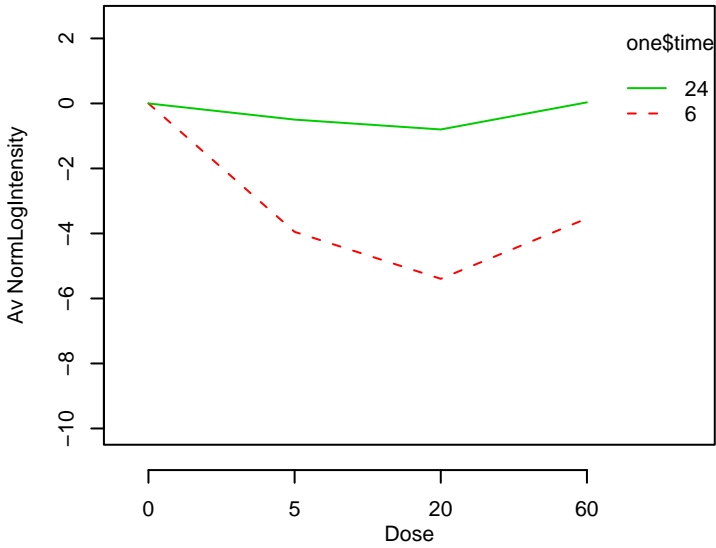

**GO\_0035137 : hindlimb morphogenesis**

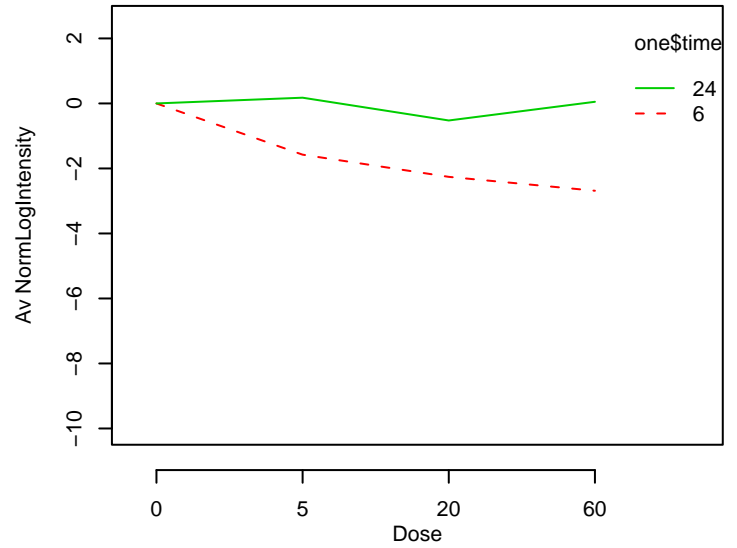

**GO\_0035239 : tube morphogenesis**

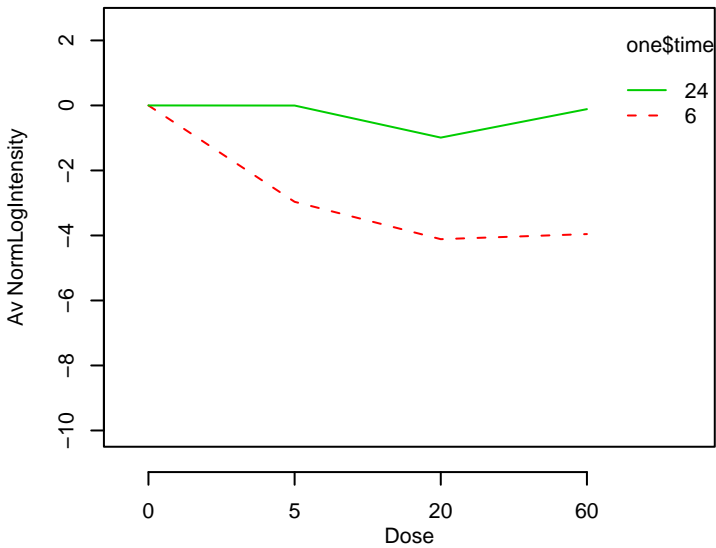

**GO\_0035264 : body growth**

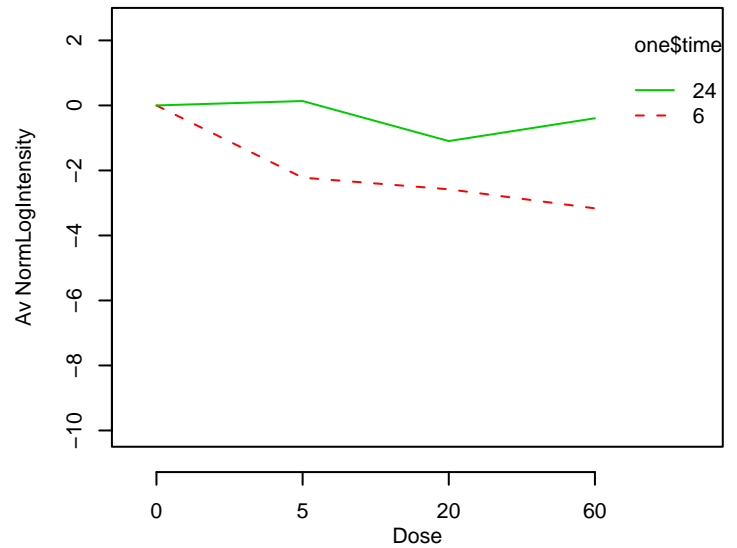

**GO\_0035270 : endocrine system development**

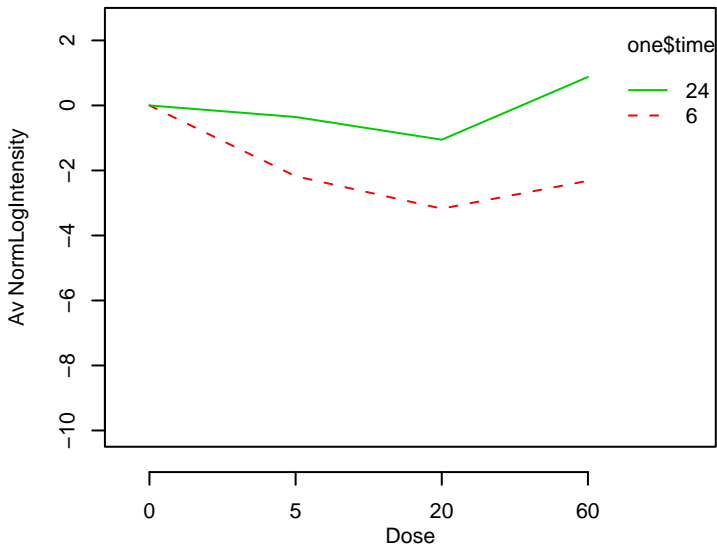

**GO\_0035272 : exocrine system development**

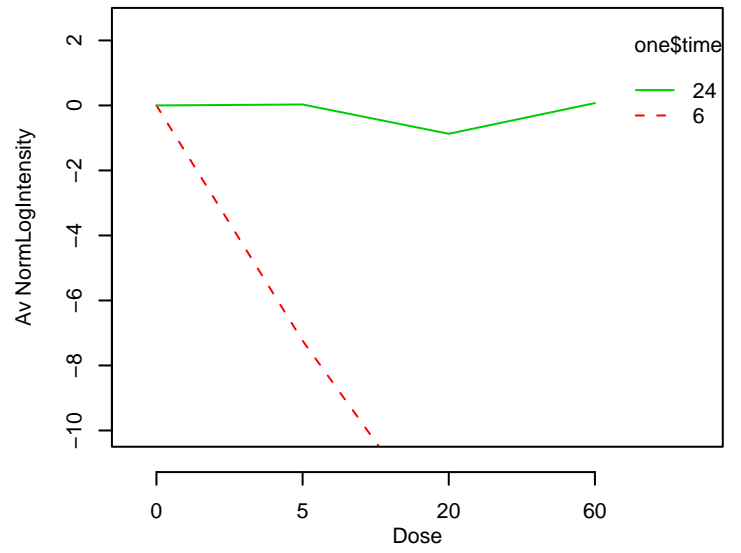

**GO\_0035282 : segmentation**

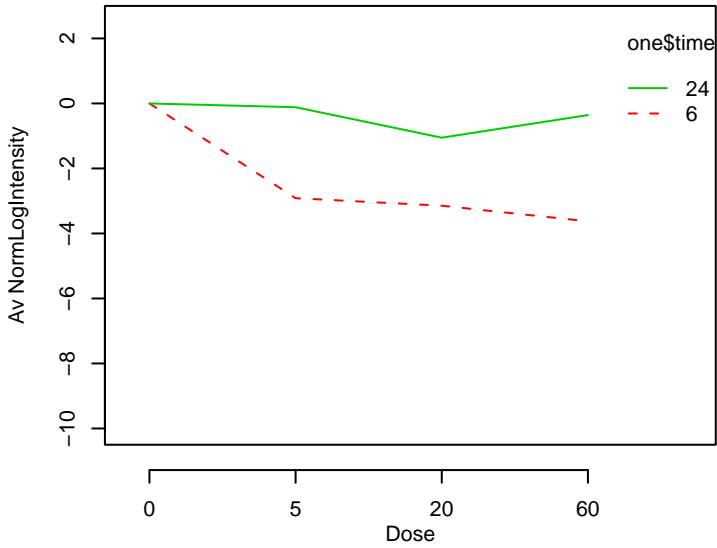

**GO\_0035295 : tube development**

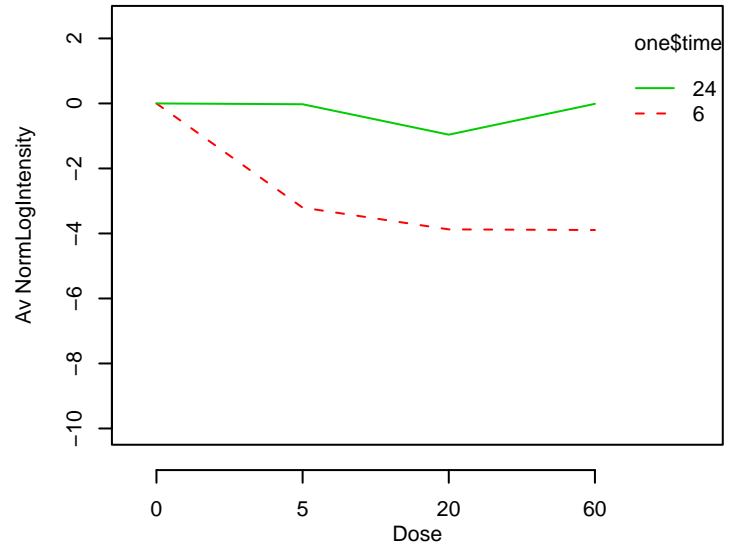

**GO\_0035315 : hair cell differentiation**

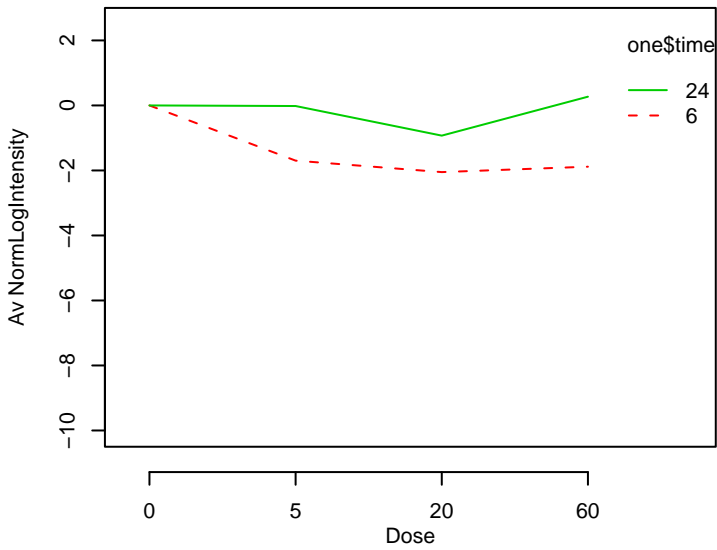

**GO\_0040007 : growth**

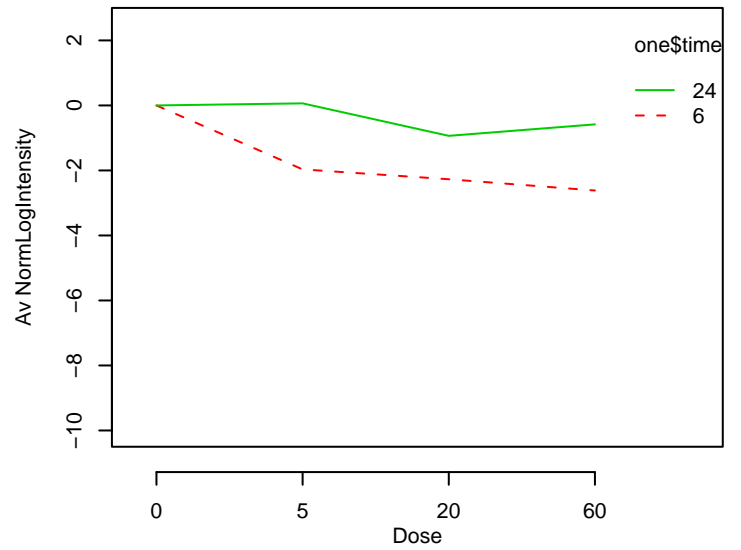

**GO\_0040008 : regulation of growth**

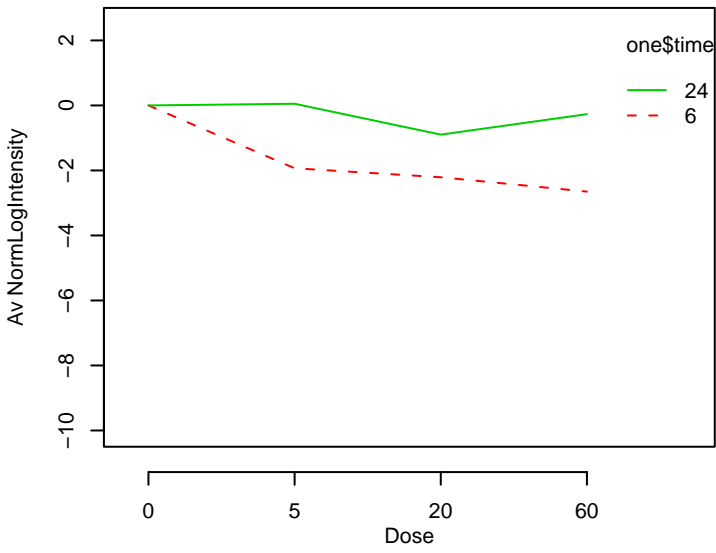

**GO\_0040012 : regulation of locomotion**

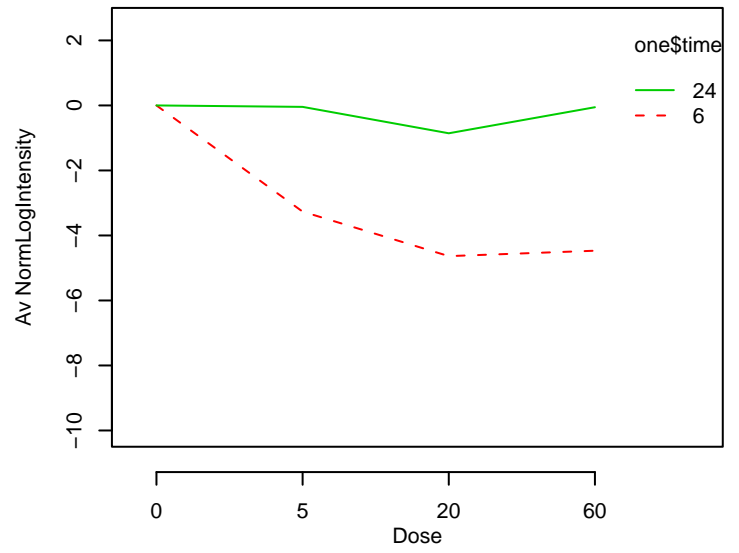

**GO\_0040013 : negative regulation of locomotion**

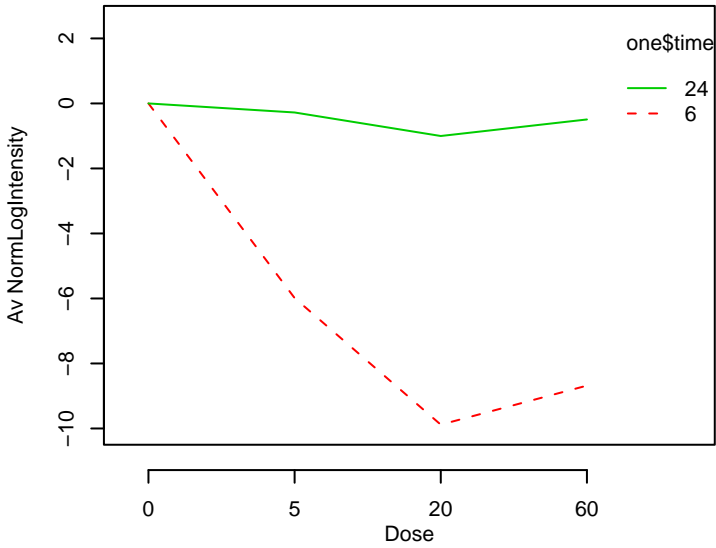

**GO\_0040014 : regulation of body size**

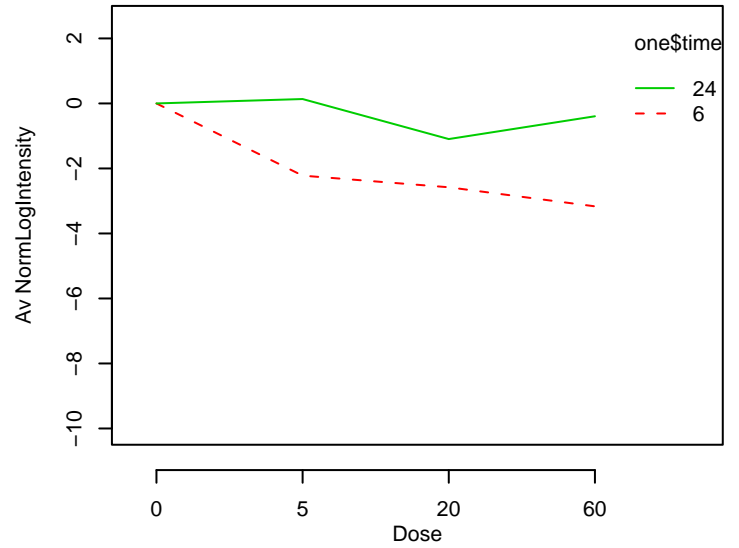

**GO\_0040015 : negative regulation of body size**

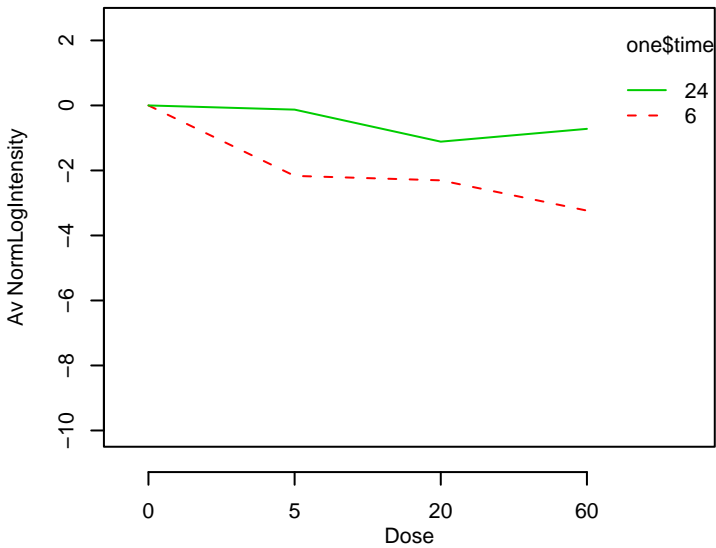

**GO\_0040017 : positive regulation of locomotion**

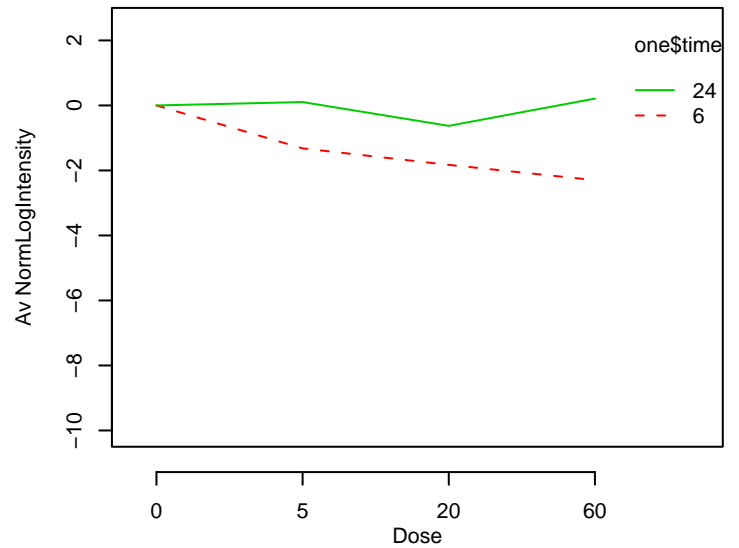

**GO\_0040018 : positive regulation of body size**

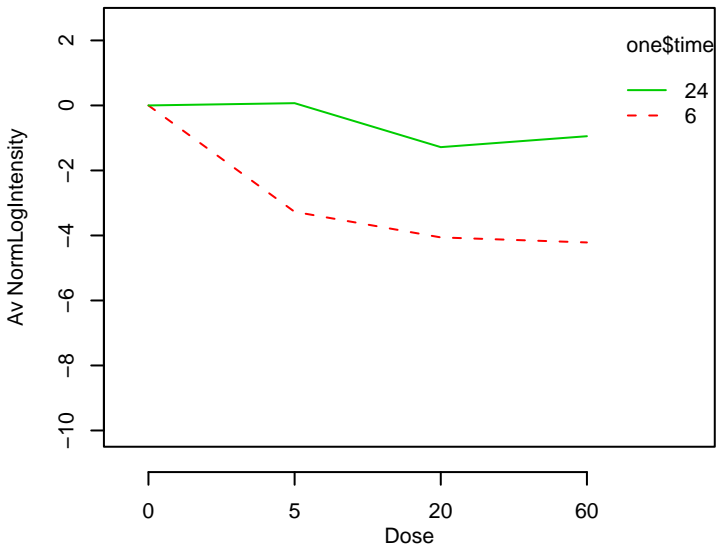

**GO\_0040023 : establishment of nucleus localization**

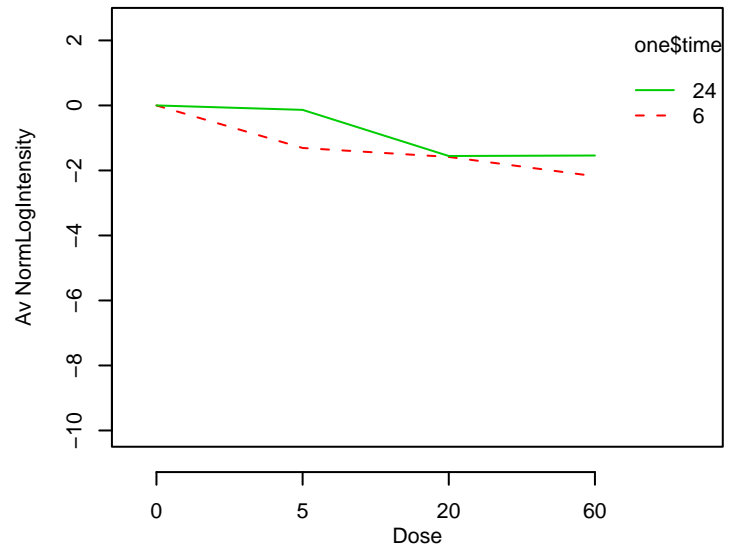

**GO\_0040029 : regulation of gene expression, epigenetic**

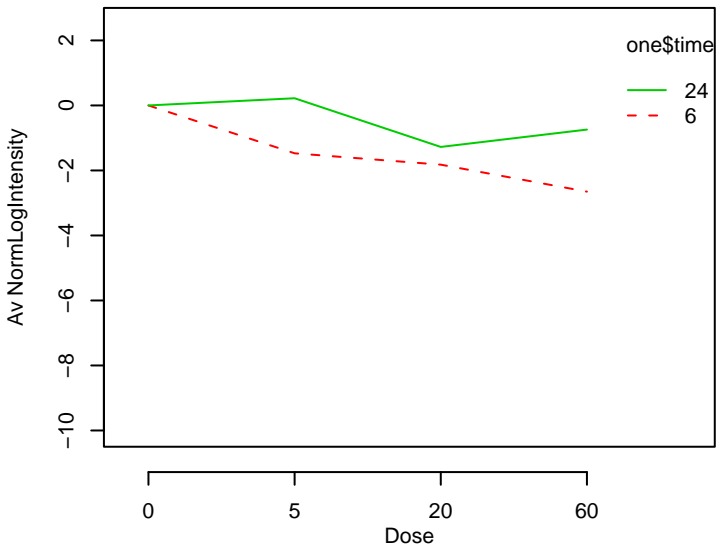

**GO\_0042033 : chemokine biosynthesis**

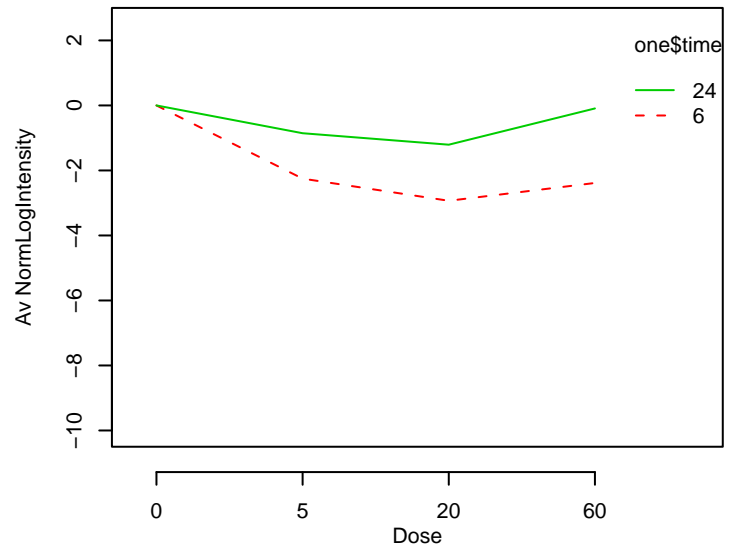

**GO\_0042035 : regulation of cytokine biosynthesis**

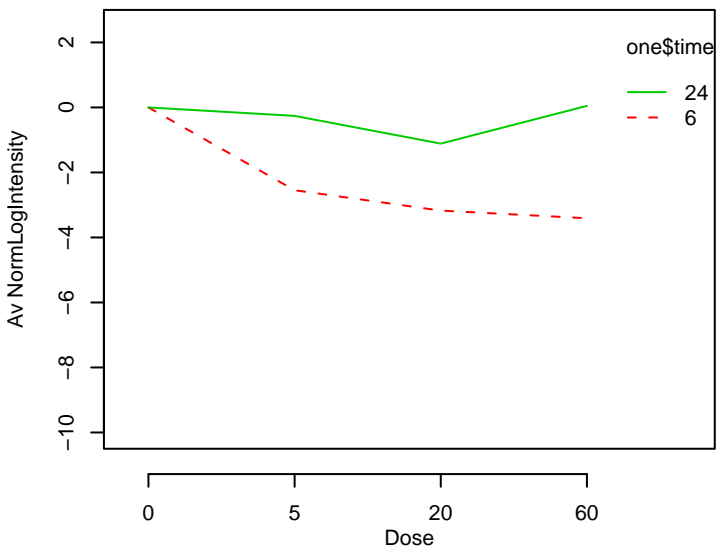

**GO\_0042036 : negative regulation of cytokine biosynthesis**

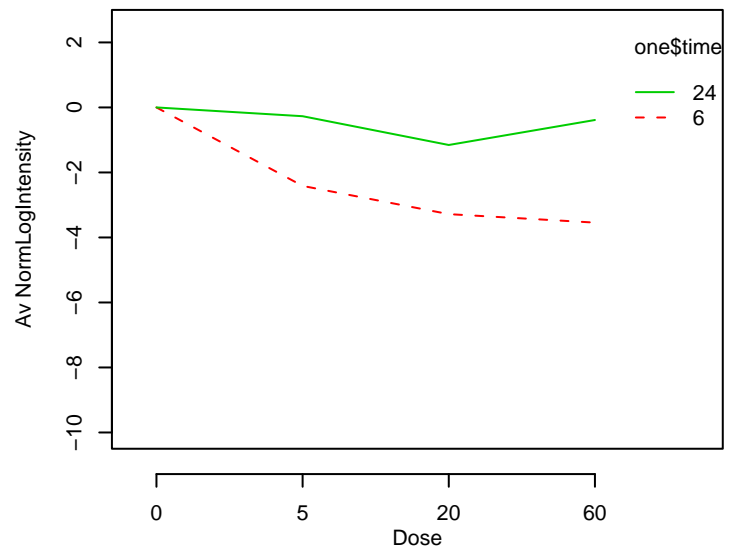

**GO\_0042044 : fluid transport**

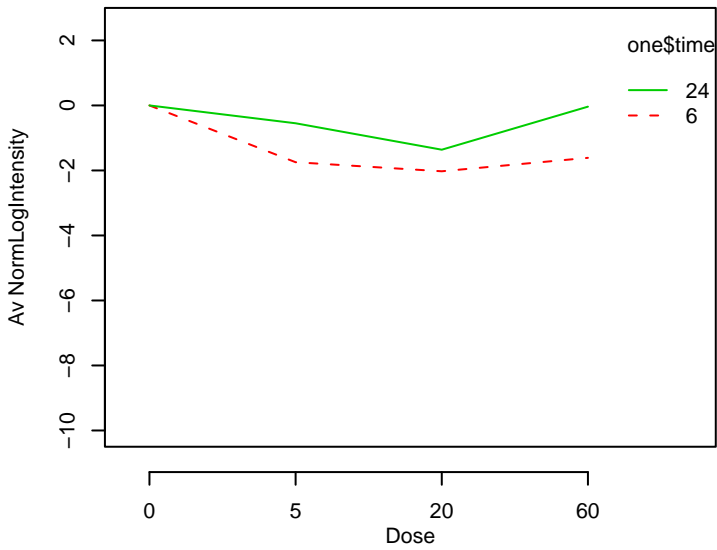

**GO\_0042060 : wound healing**

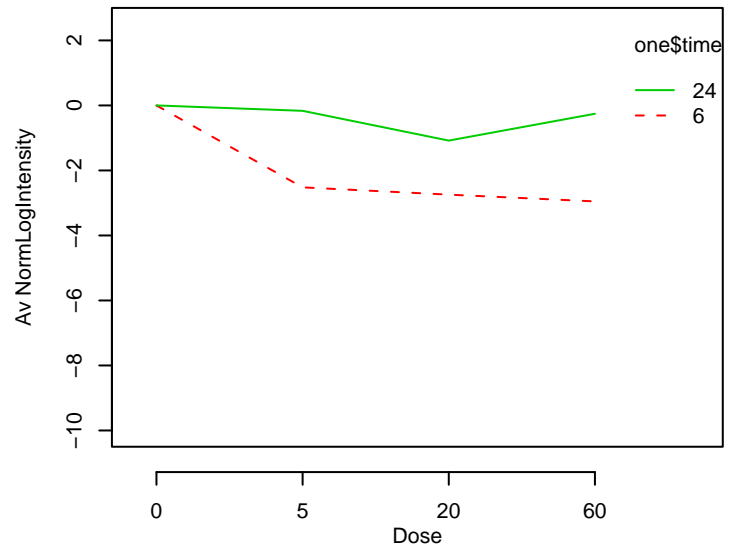

**GO\_0042062 : long-term strengthening of neuromuscular junction**

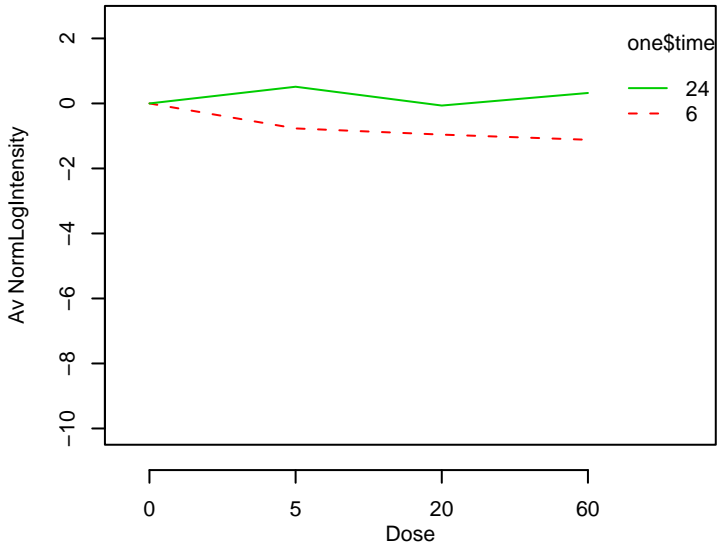

**GO\_0042063 : gliogenesis**

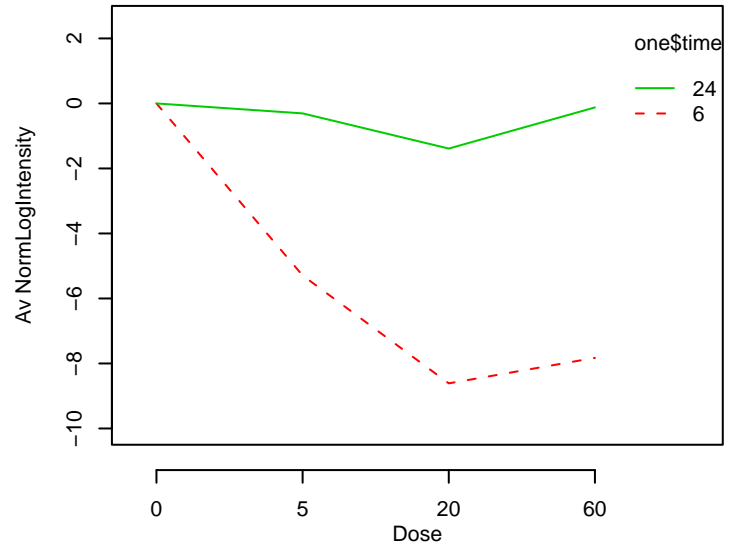

**GO\_0042074 : cell migration involved in gastrulation**

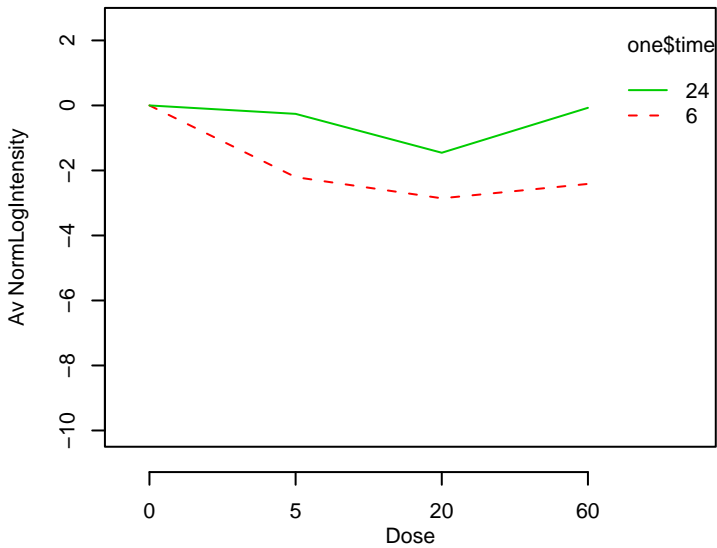

**GO\_0042088 : T-helper 1 type immune response**

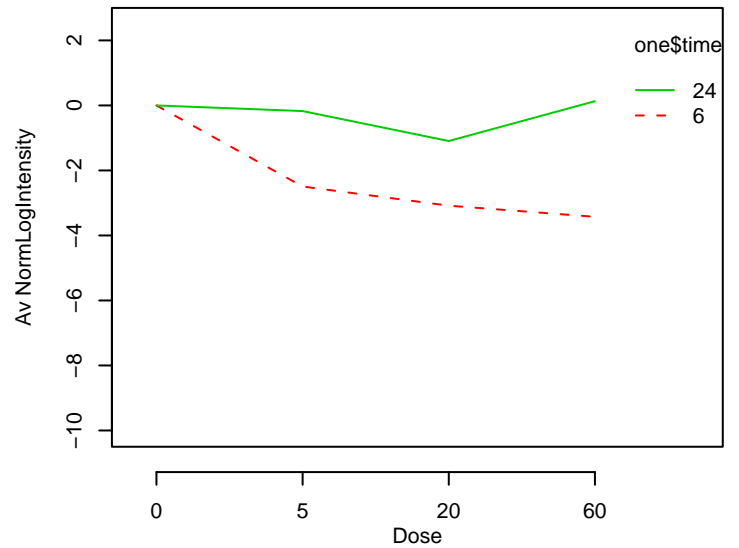



**GO\_0042089 : cytokine biosynthesis**

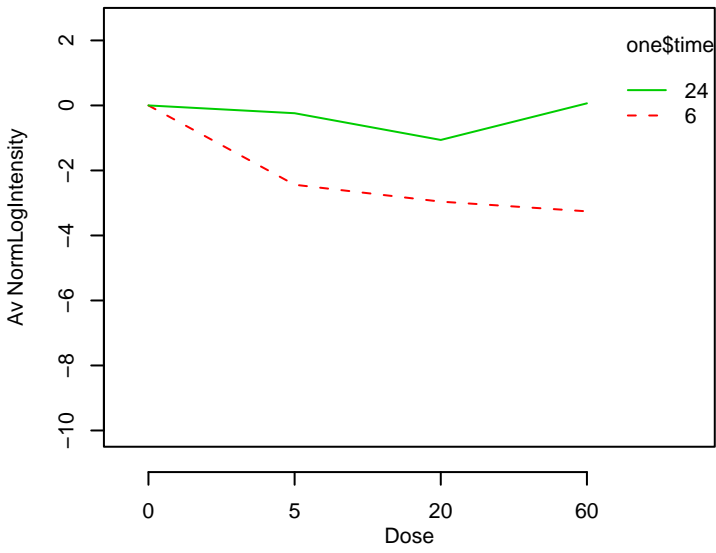

**GO\_0042090 : interleukin-12 biosynthesis**

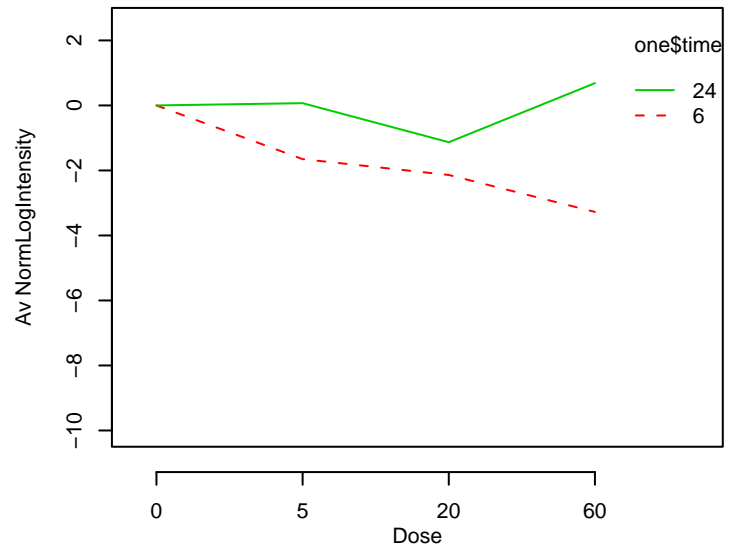

**GO\_0042092 : T-helper 2 type immune response**

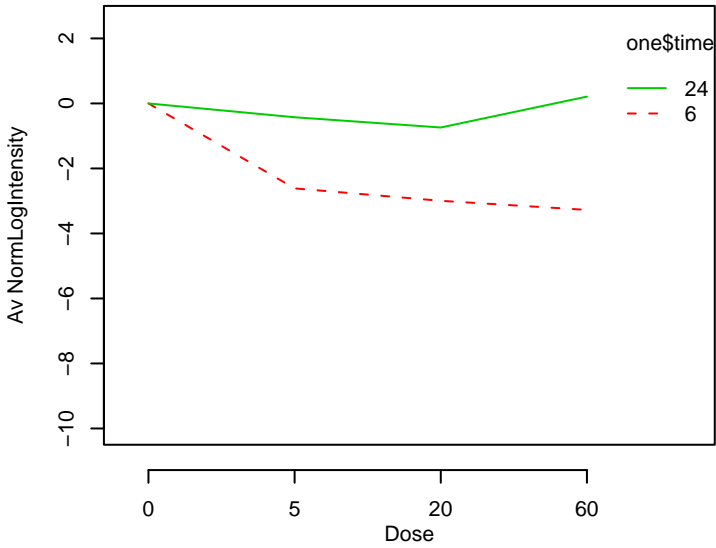

**GO\_0042093 : T-helper cell differentiation**

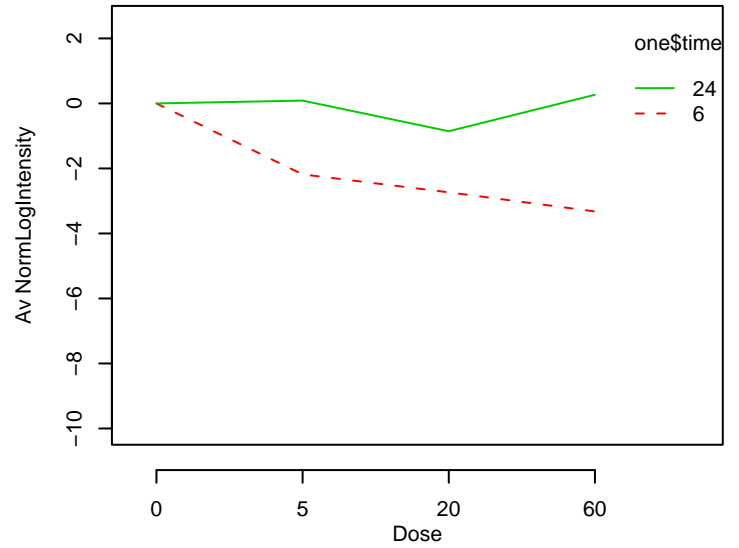

**GO\_0042094 : interleukin-2 biosynthesis**

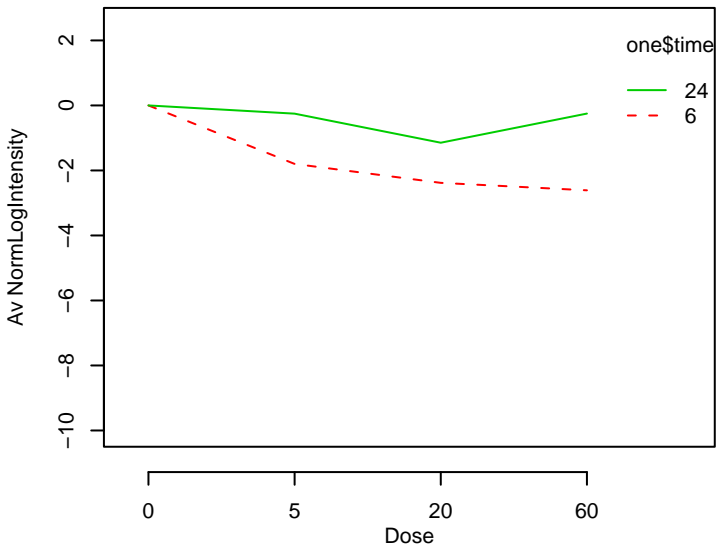

**GO\_0042095 : interferon-gamma biosynthesis**

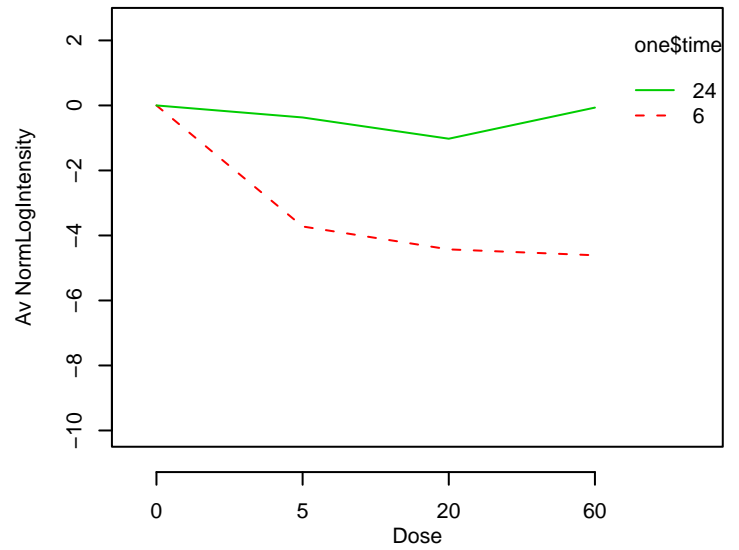

**GO\_0042098 : T cell proliferation**

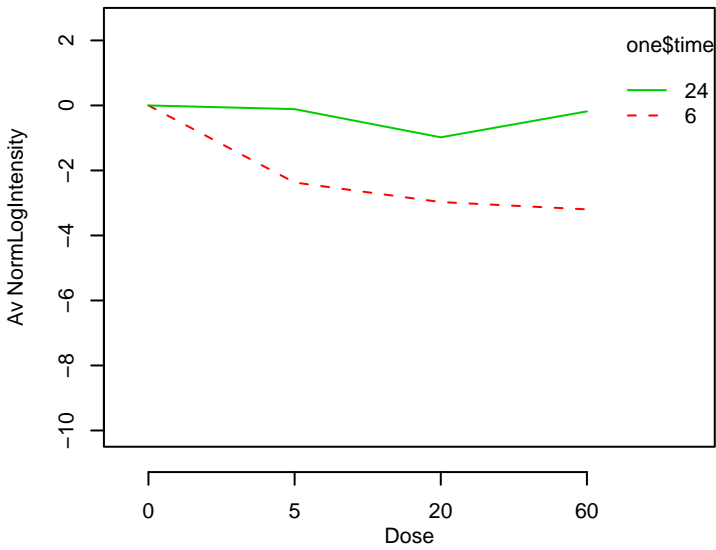

**GO\_0042100 : B cell proliferation**

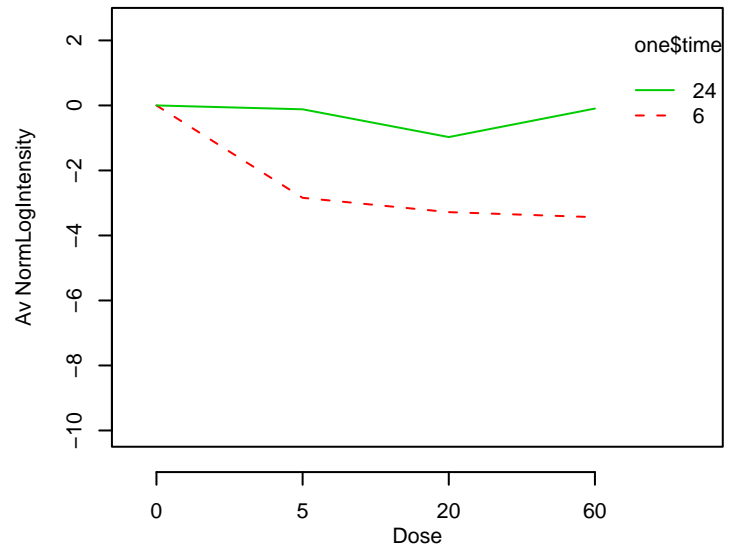

**GO\_0042102 : positive regulation of T cell proliferation**

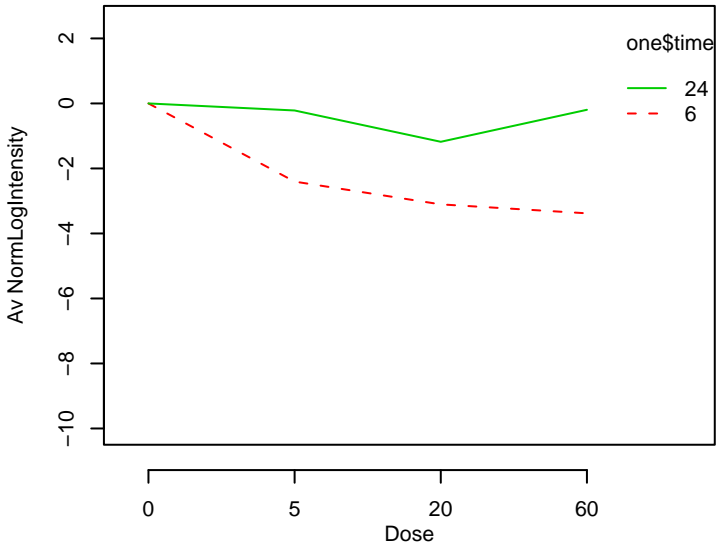

**GO\_0042104 : positive regulation of activated T cell prolifer**

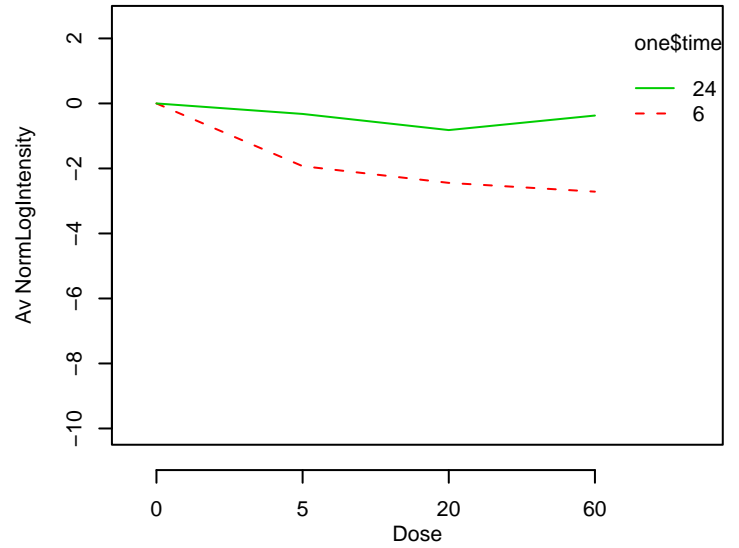

**GO\_0042107 : cytokine metabolism**

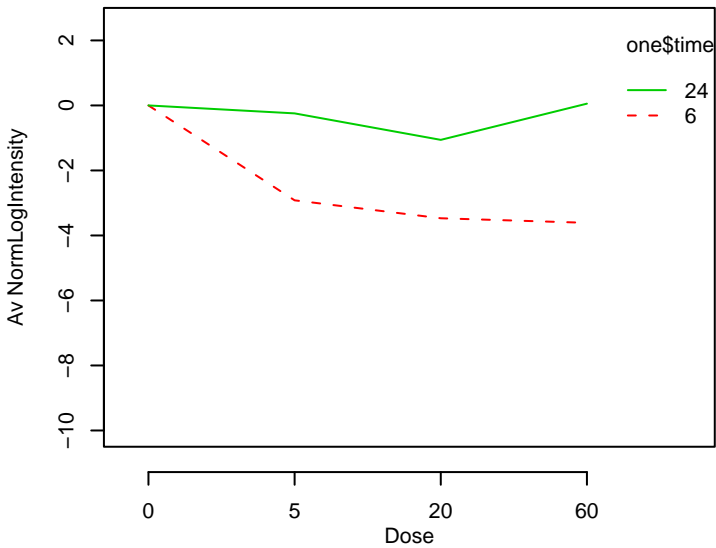

**GO\_0042108 : positive regulation of cytokine biosynthesis**

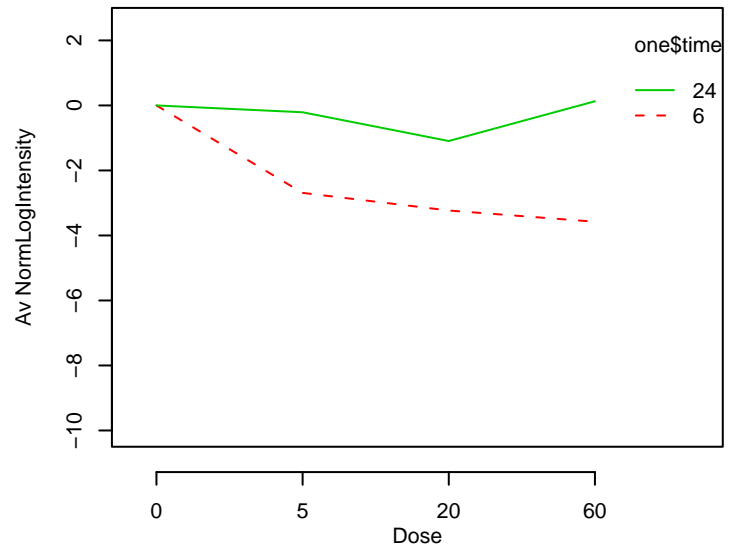

**GO\_0042110 : T cell activation**

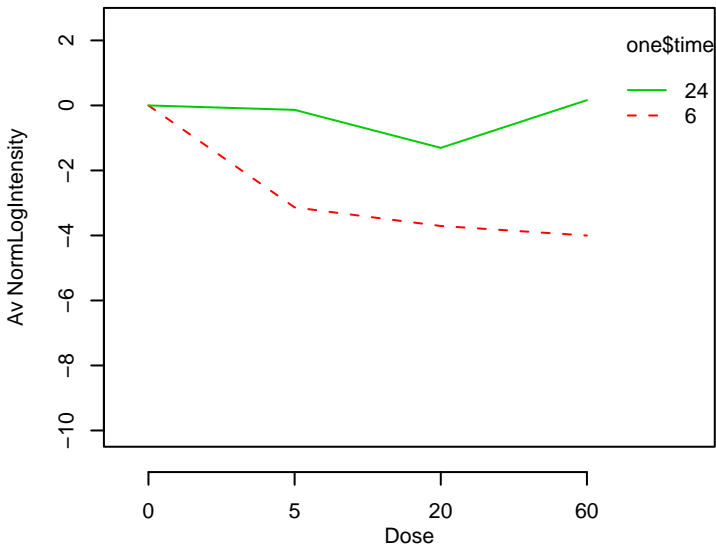

**GO\_0042113 : B cell activation**

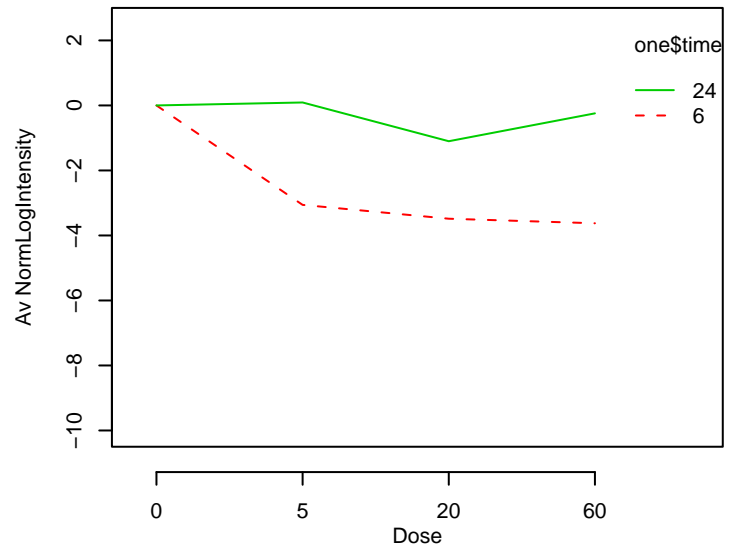

**GO\_0042116 : macrophage activation**

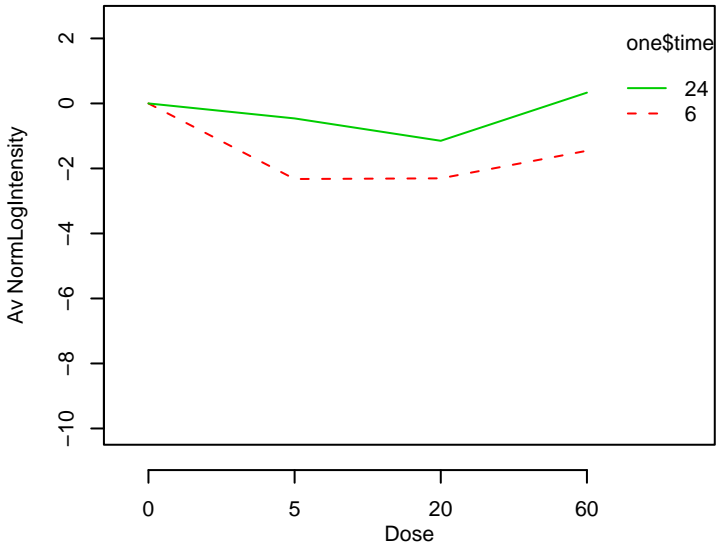

**GO\_0042119 : neutrophil activation**

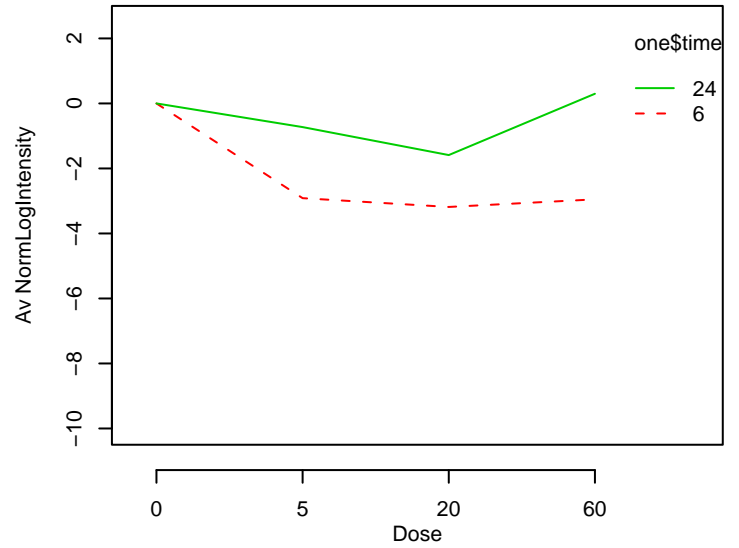

**GO\_0042129 : regulation of T cell proliferation**

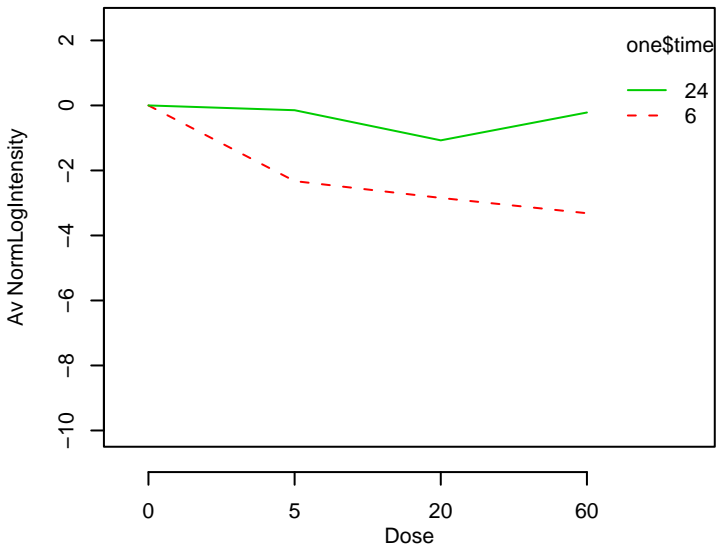

**GO\_0042130 : negative regulation of T cell proliferation**

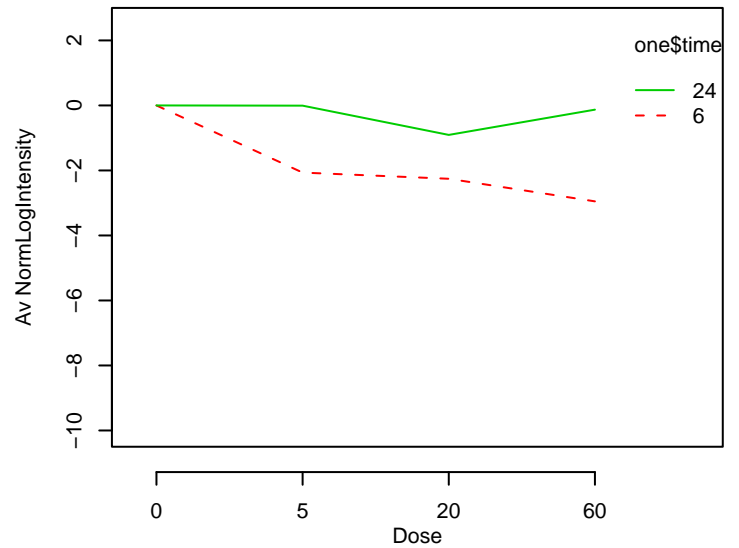

**GO\_0042133 : neurotransmitter metabolism**

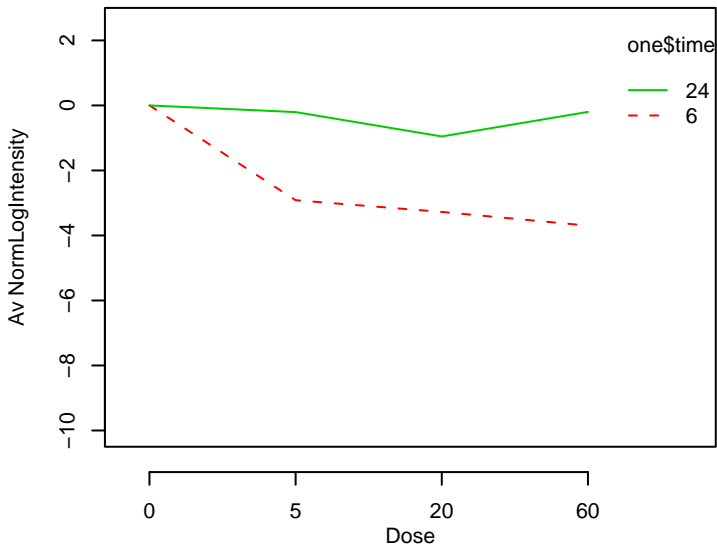

**GO\_0042135 : neurotransmitter catabolism**

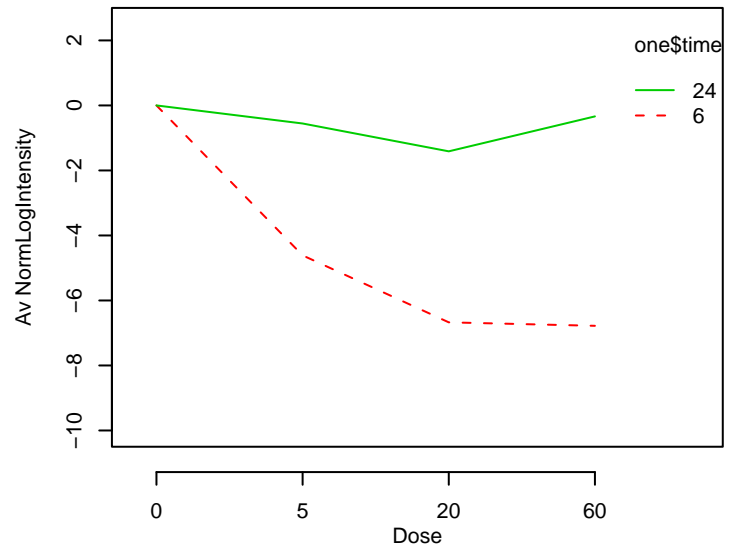

**GO\_0042136 : neurotransmitter biosynthesis**

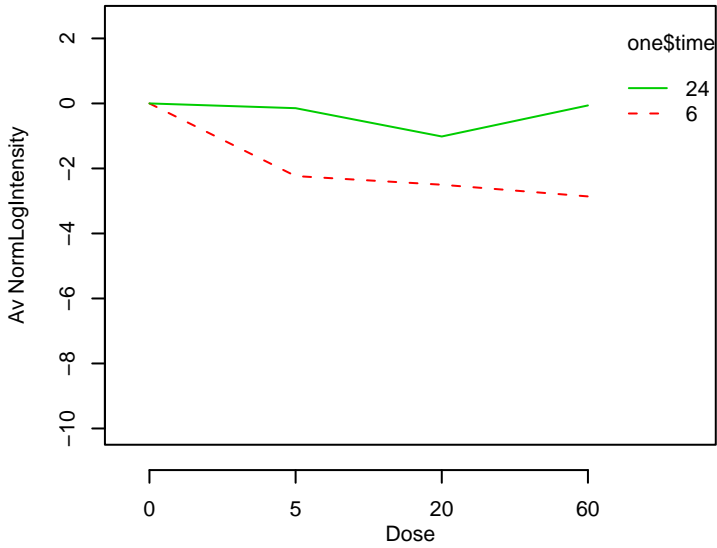

**GO\_0042157 : lipoprotein metabolism**

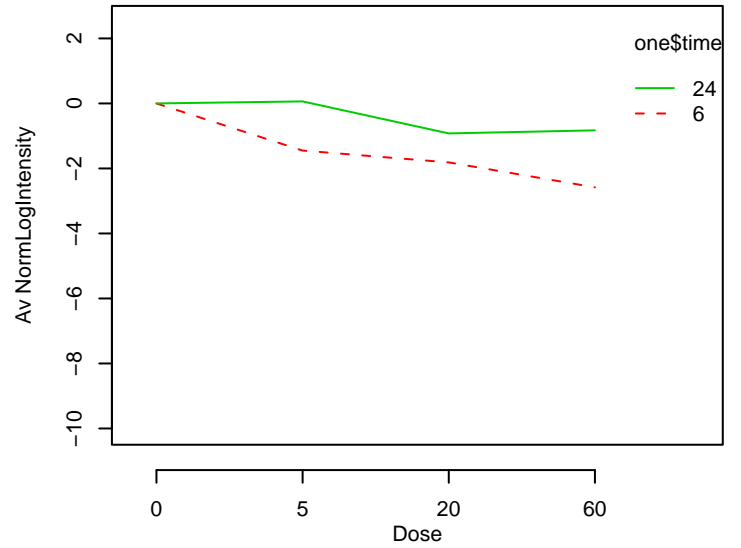

**GO\_0042158 : lipoprotein biosynthesis**

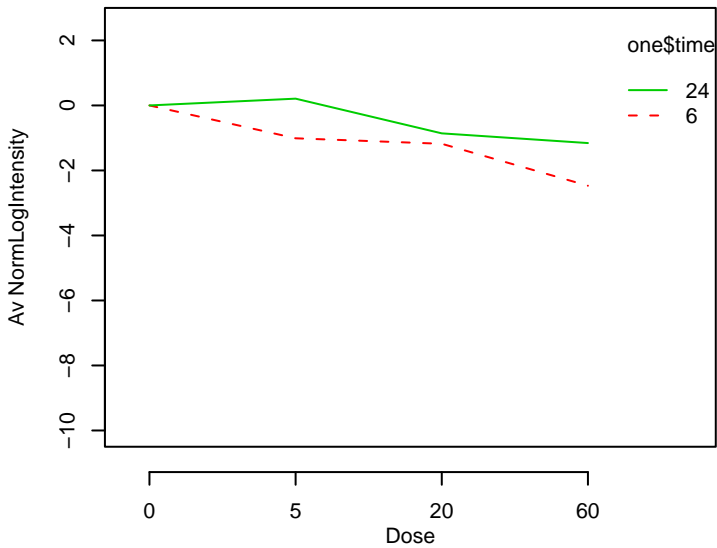

**GO\_0042168 : heme metabolism**

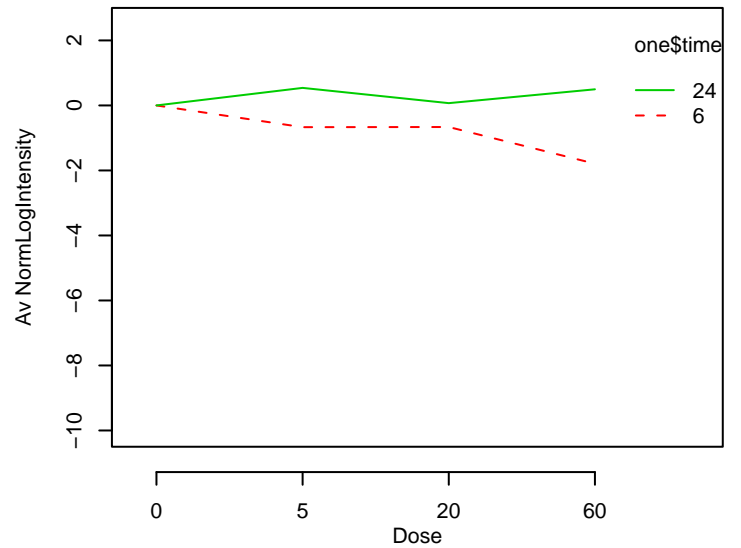

**GO\_0042176 : regulation of protein catabolism**

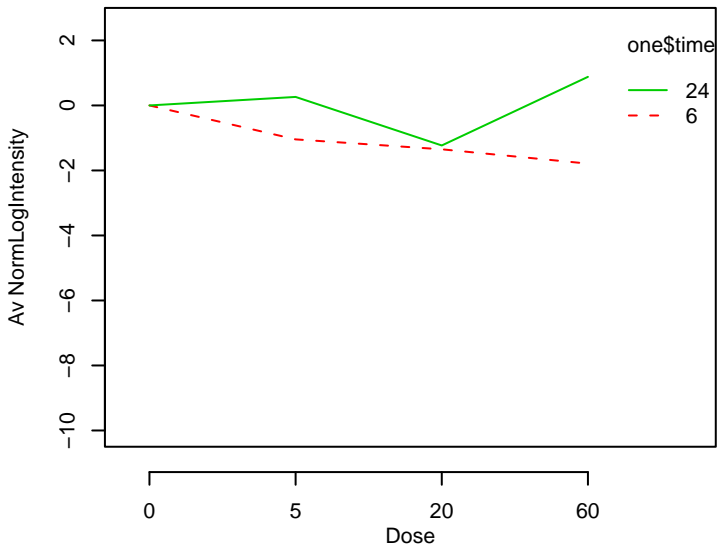

**GO\_0042177 : negative regulation of protein catabolism**

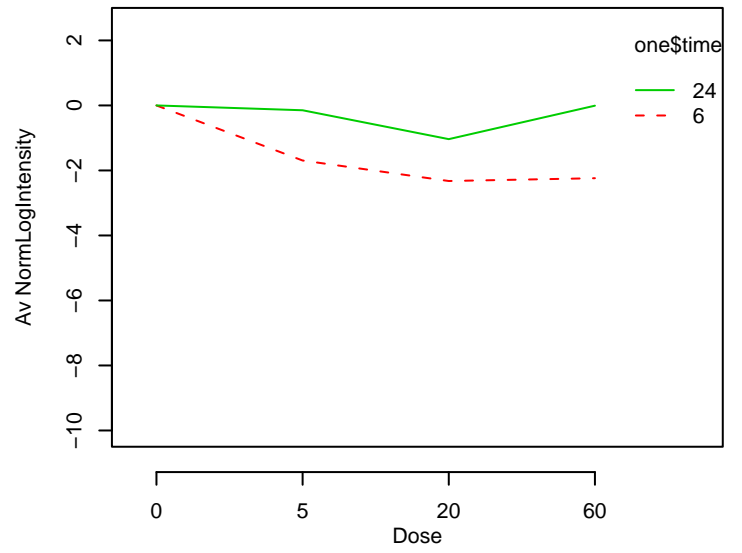

**GO\_0042214 : terpene metabolism**

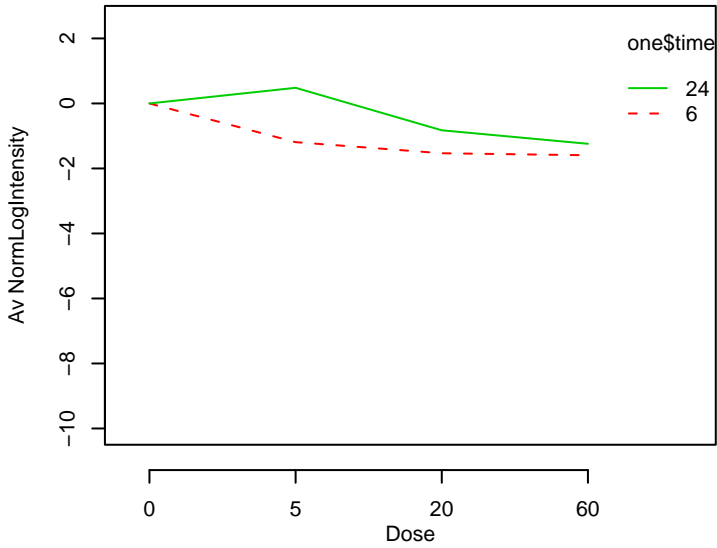

**GO\_0042219 : amino acid derivative catabolism**

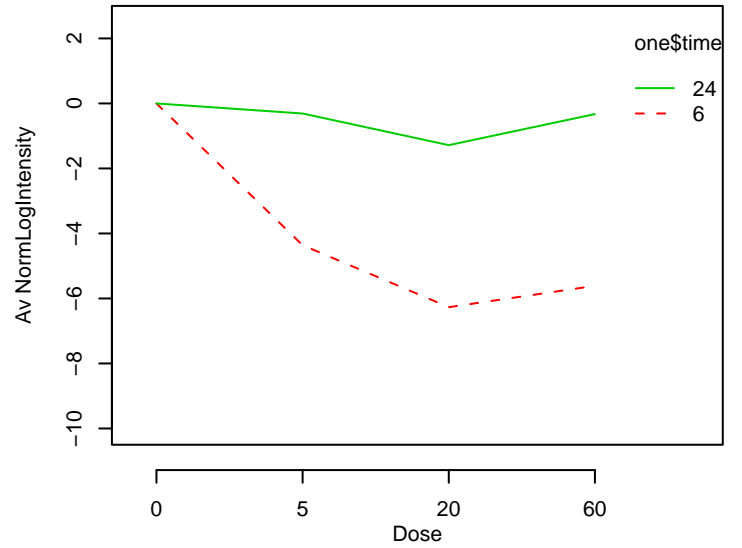

**GO\_0042226 : interleukin-6 biosynthesis**

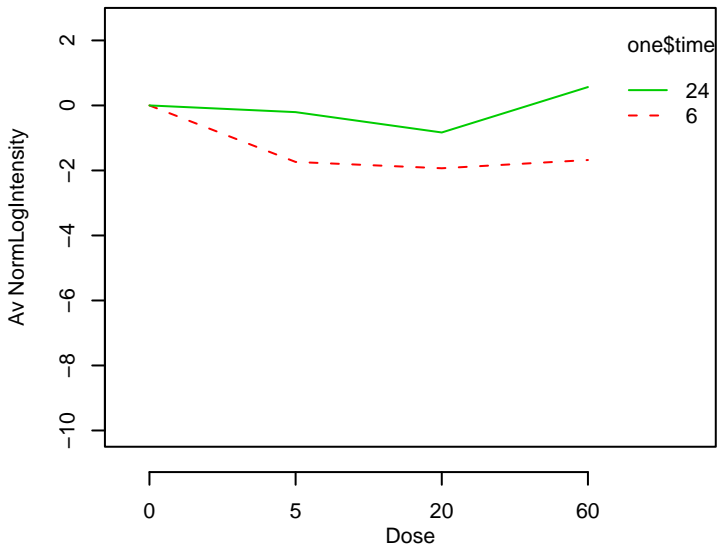

**GO\_0042228 : interleukin-8 biosynthesis**

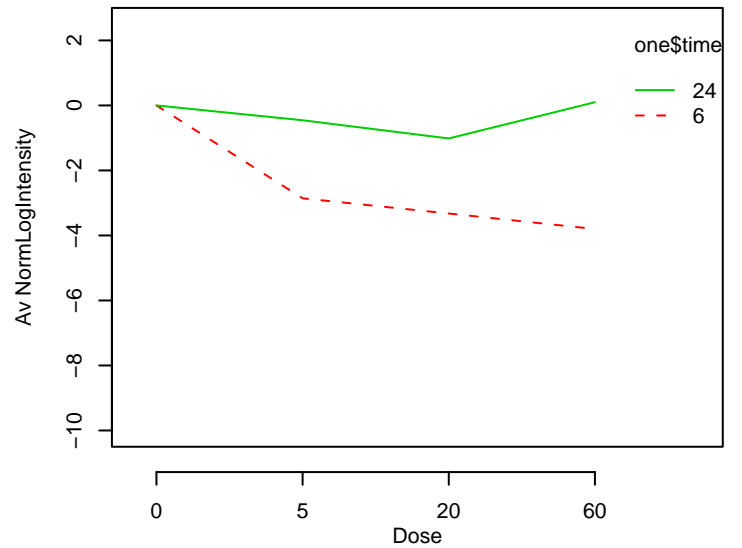

**GO\_0042246 : tissue regeneration**

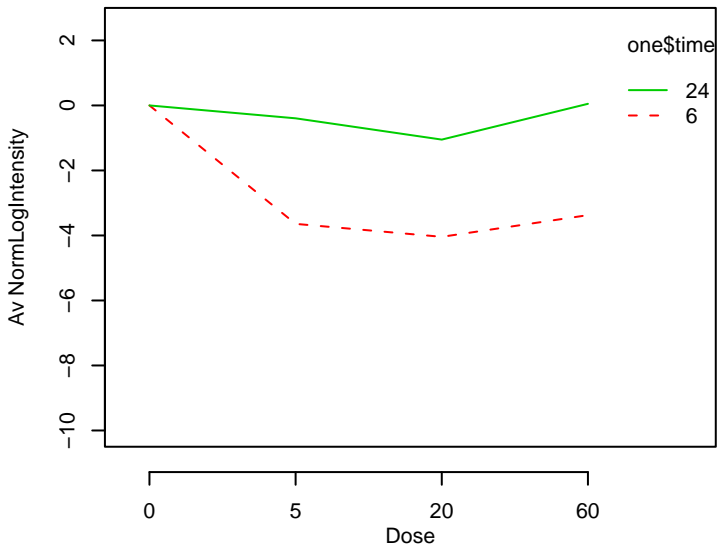

**O\_0042253 : granulocyte macrophage colony-stimulating fa**

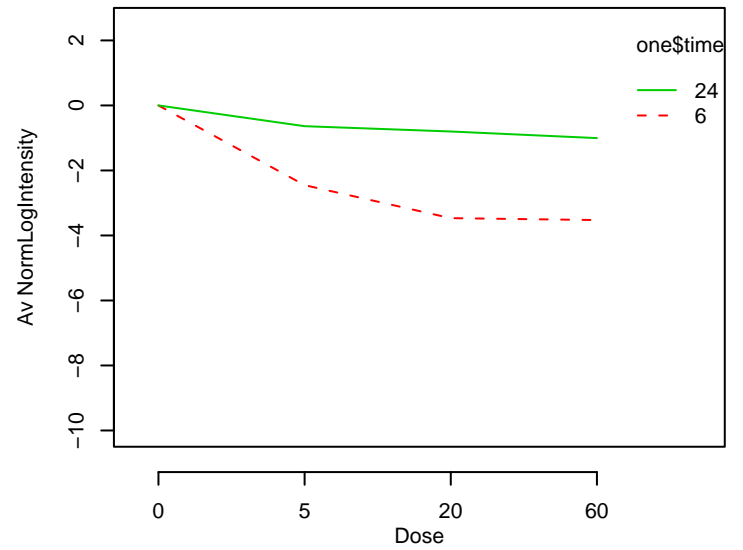

**GO\_0042254 : ribosome biogenesis and assembly**

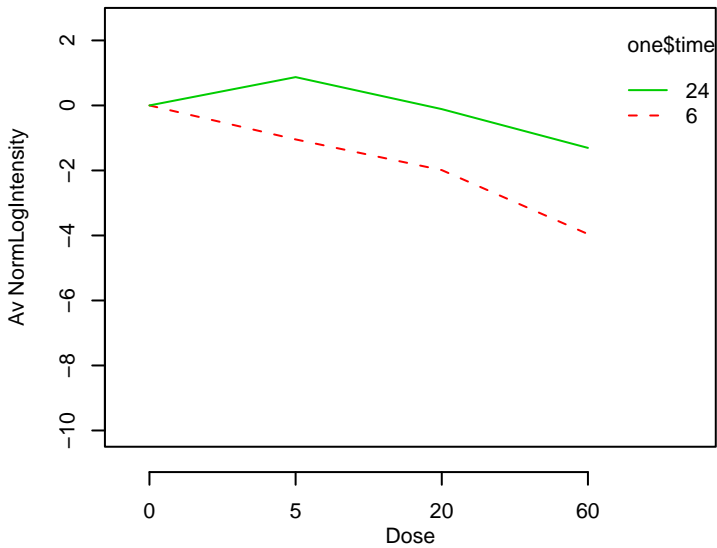

**GO\_0042267 : natural killer cell mediated cytotoxicity**

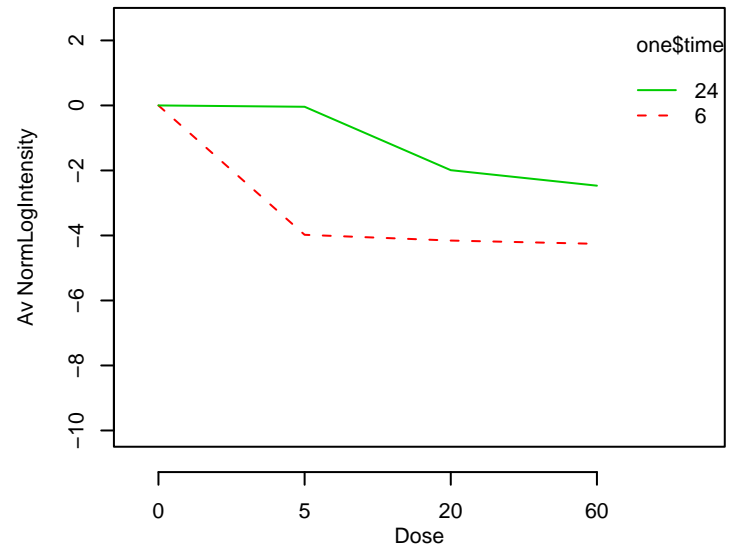

**GO\_0042278 : purine nucleoside metabolism**

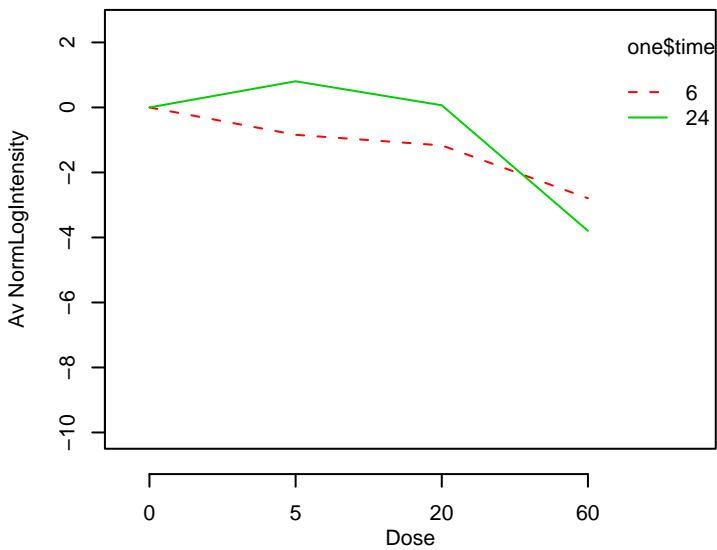

**GO\_0042303 : molting cycle**

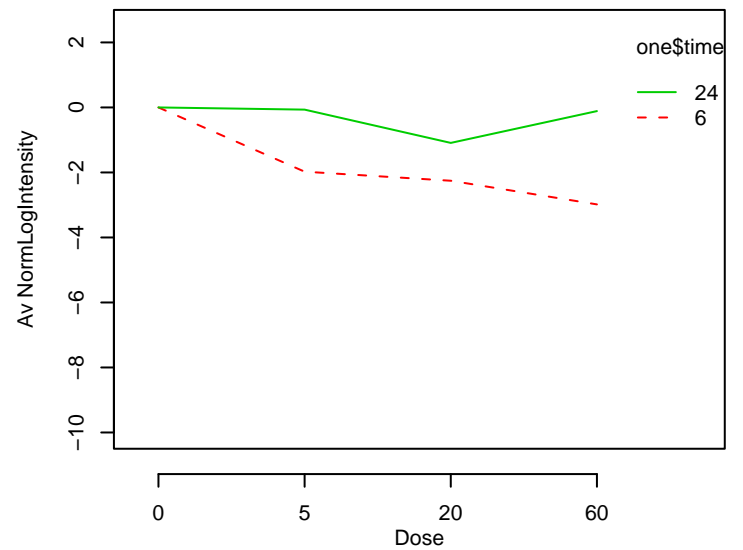

**GO\_0042306 : regulation of protein import into nucleus**   **GO\_0042307 : positive regulation of protein import into nucl**

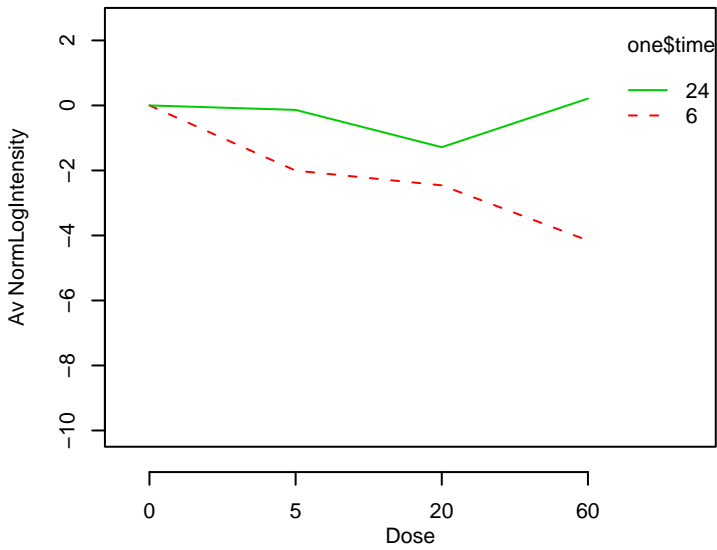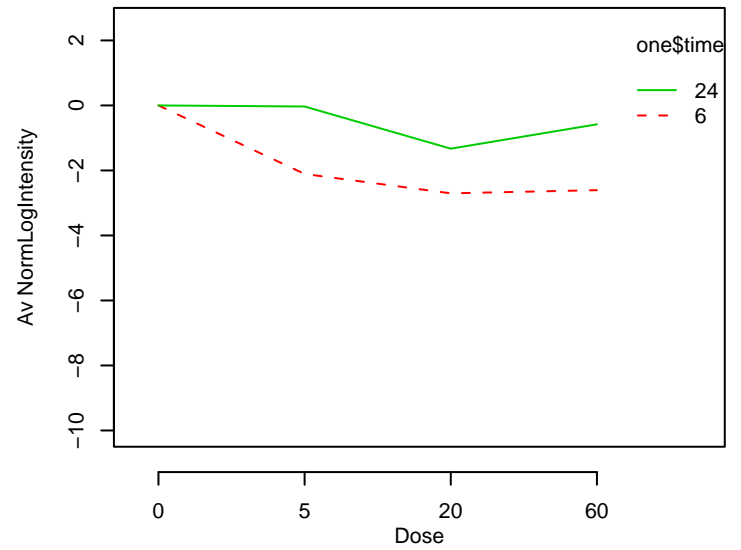

**GO\_0042308 : negative regulation of protein import into nucl**

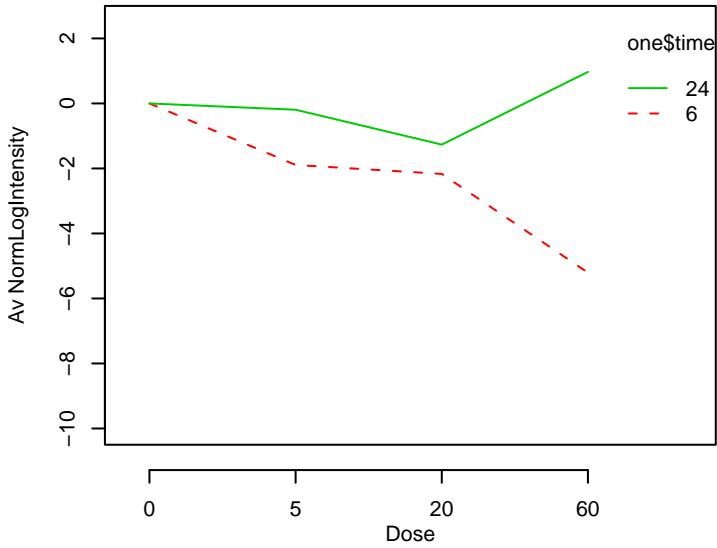

**GO\_0042310 : vasoconstriction**

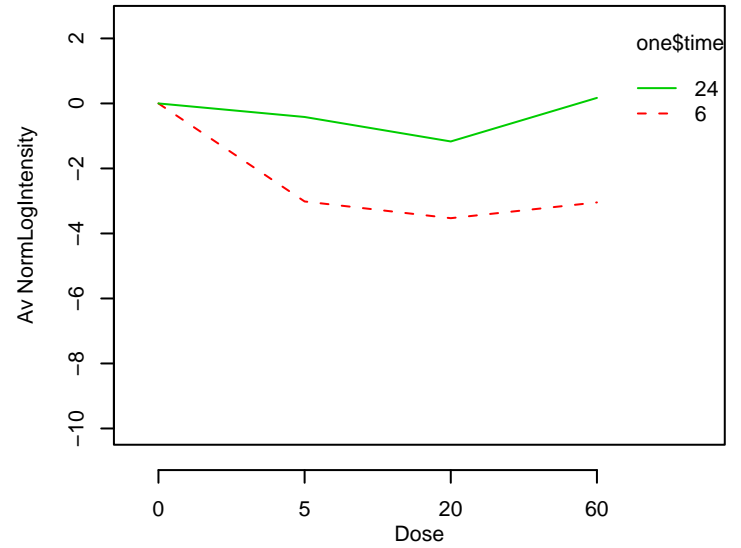

**GO\_0042311 : vasodilation**

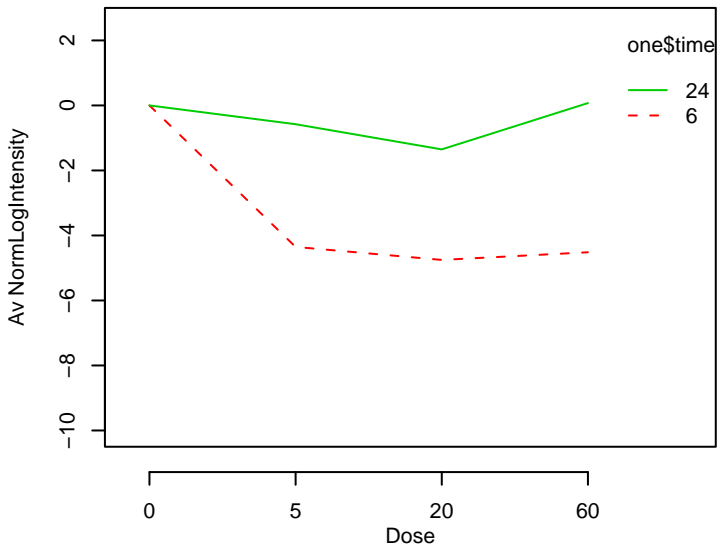

**GO\_0042312 : regulation of vasodilation**

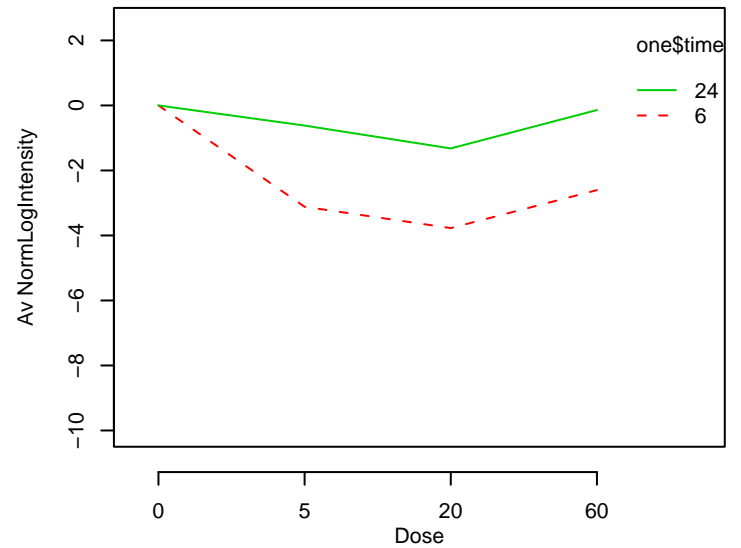

**GO\_0042325 : regulation of phosphorylation**

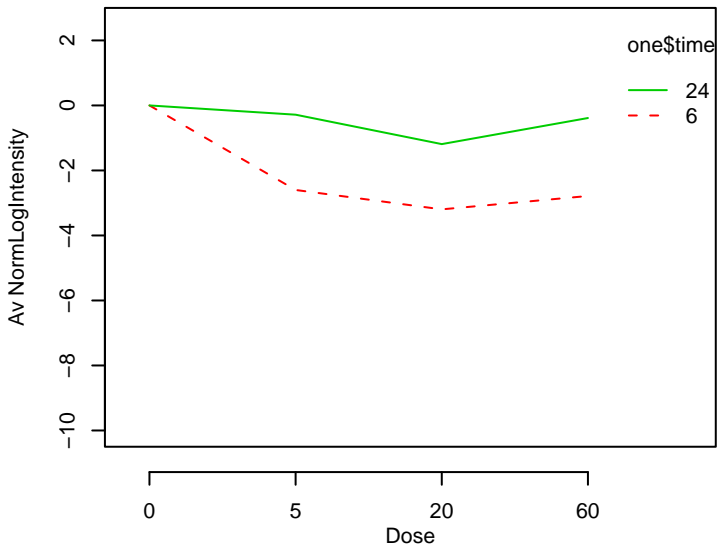

**GO\_0042326 : negative regulation of phosphorylation**

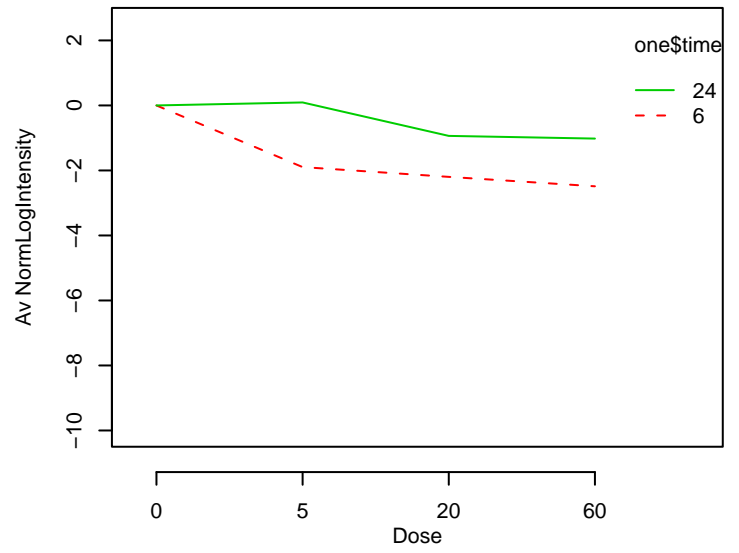

**GO\_0042327 : positive regulation of phosphorylation**

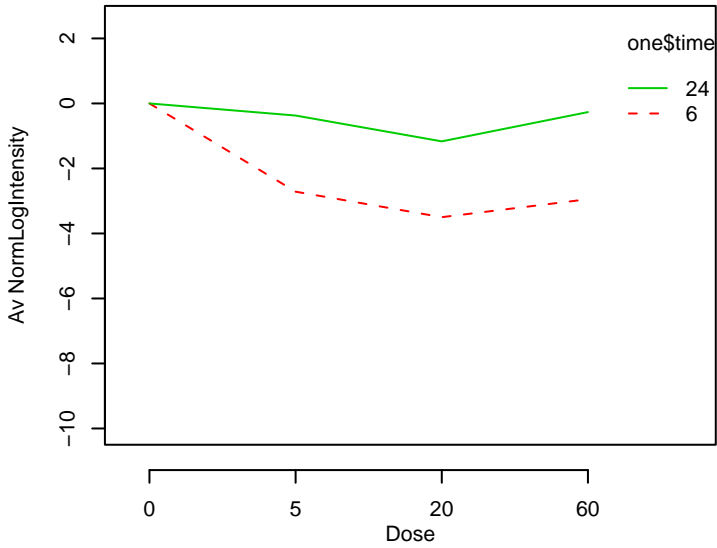

**GO\_0042330 : taxis**

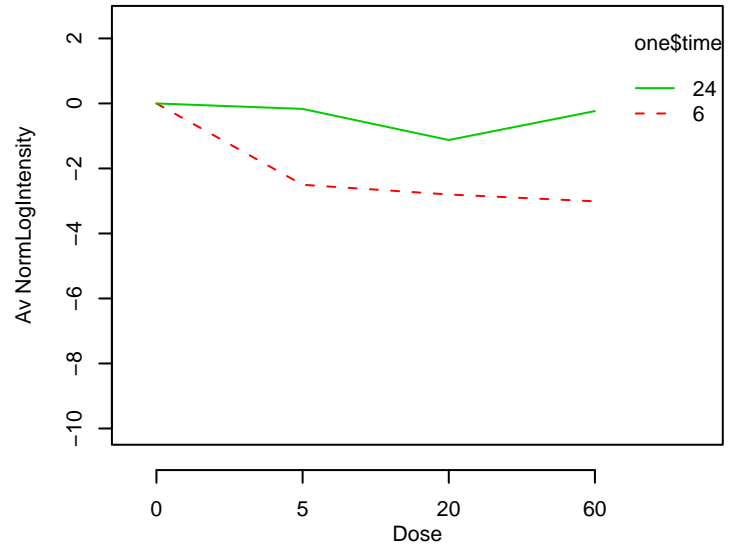

**GO\_0042345 : regulation of NF-kappaB import into nucleus**

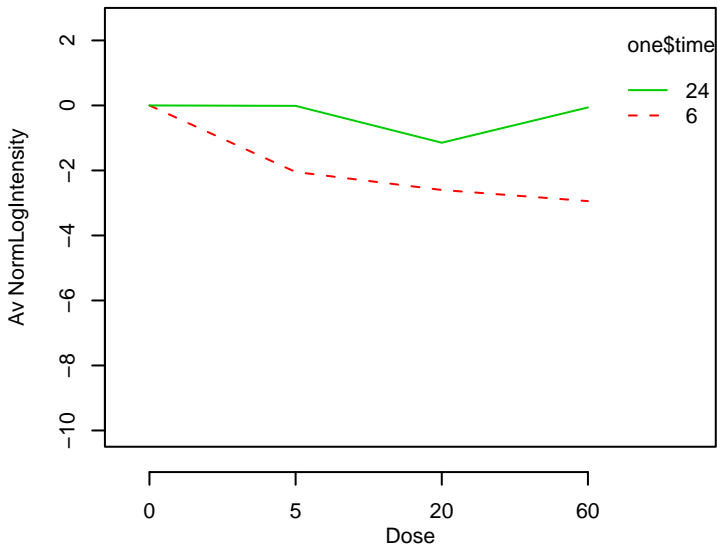

**GO\_0042346 : positive regulation of NF-kappaB import into nucleus**

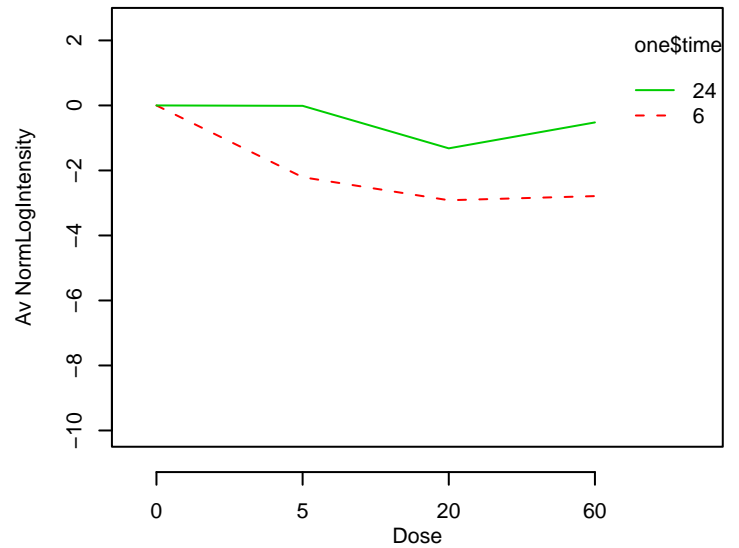



**GO\_0042347 : negative regulation of NF-kappaB import into r**

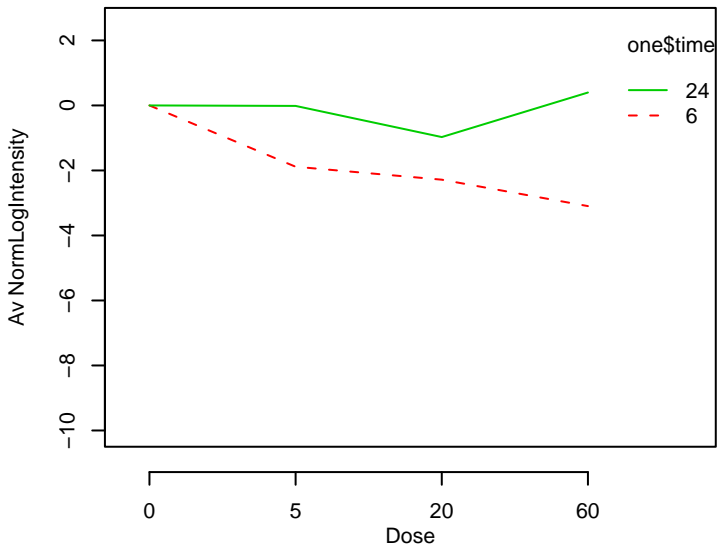

**GO\_0042348 : NF-kappaB import into nucleus**

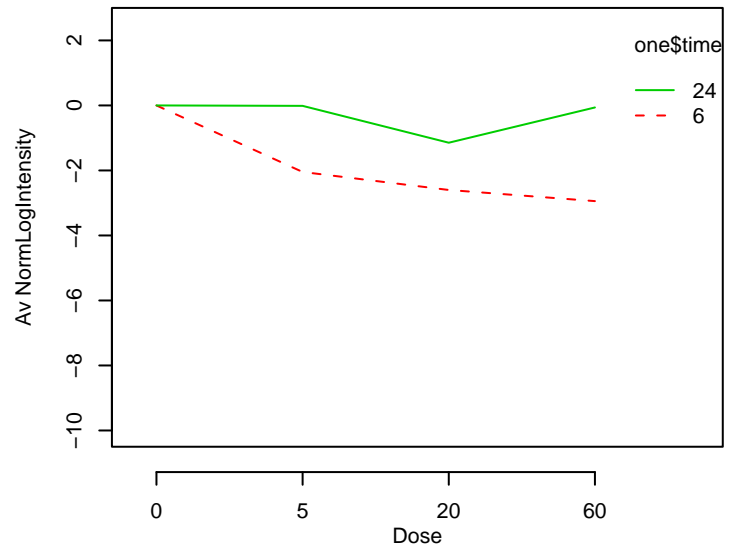

**GO\_0042354 : L-fucose metabolism**

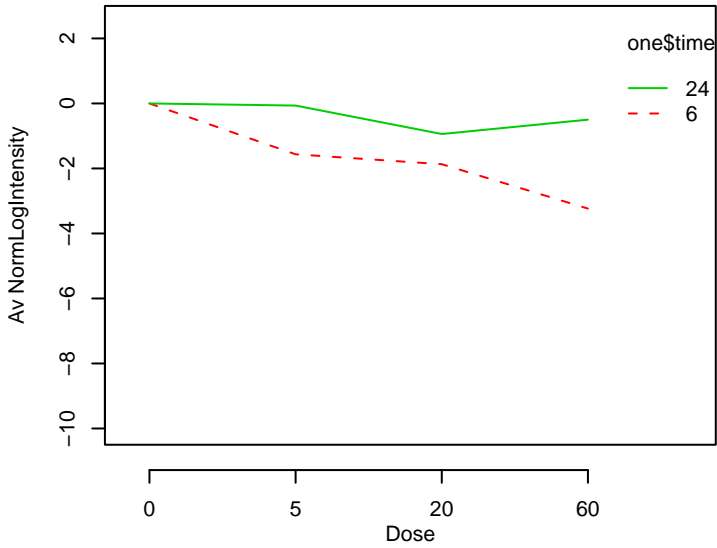

**GO\_0042355 : L-fucose catabolism**

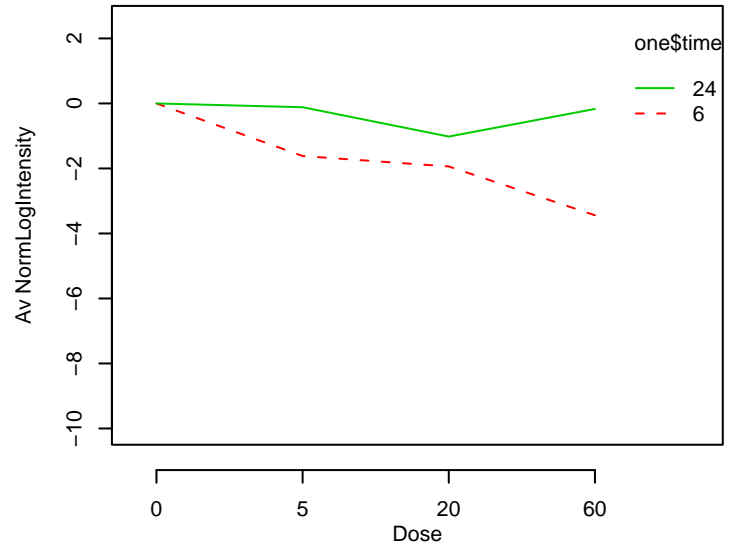

**GO\_0042364 : water-soluble vitamin biosynthesis**

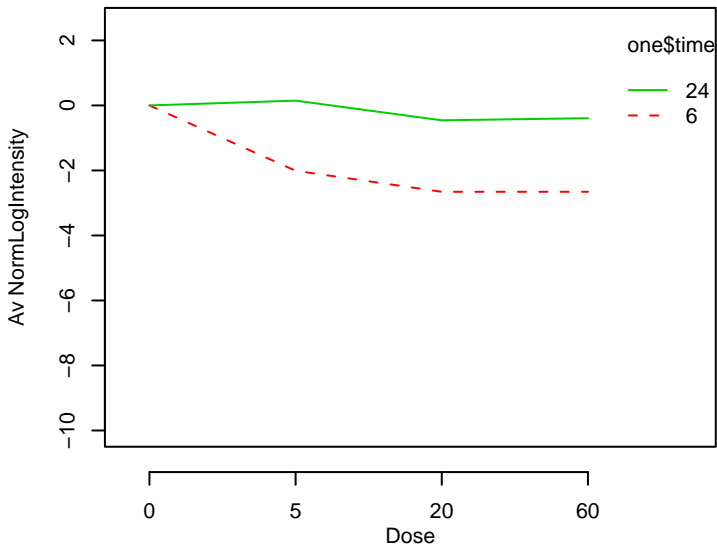

**GO\_0042375 : quinone cofactor metabolism**

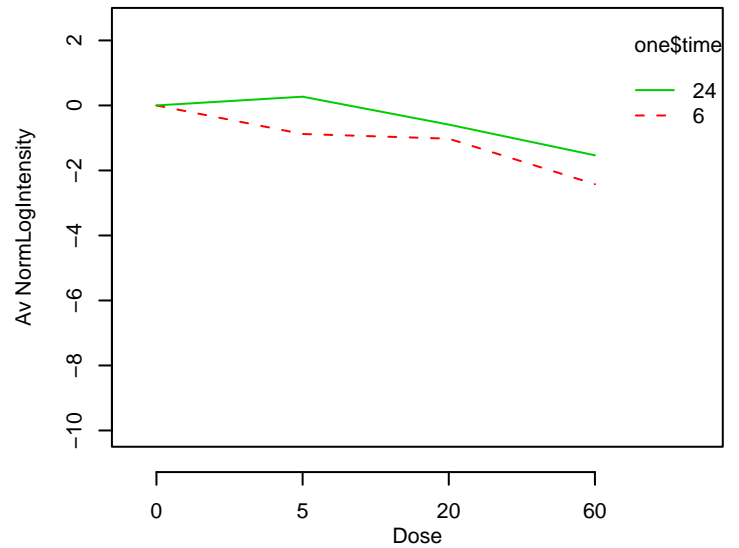

**GO\_0042384 : cilium biogenesis**

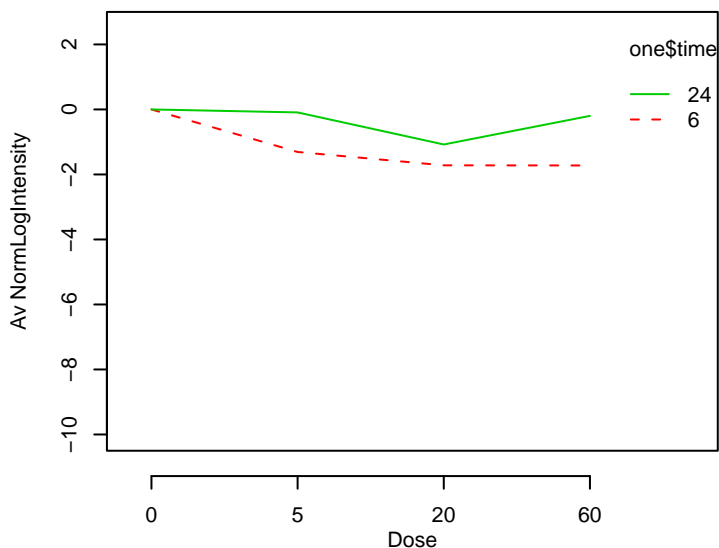

**GO\_0042386 : hemocyte differentiation (sensu Arthropoda)**

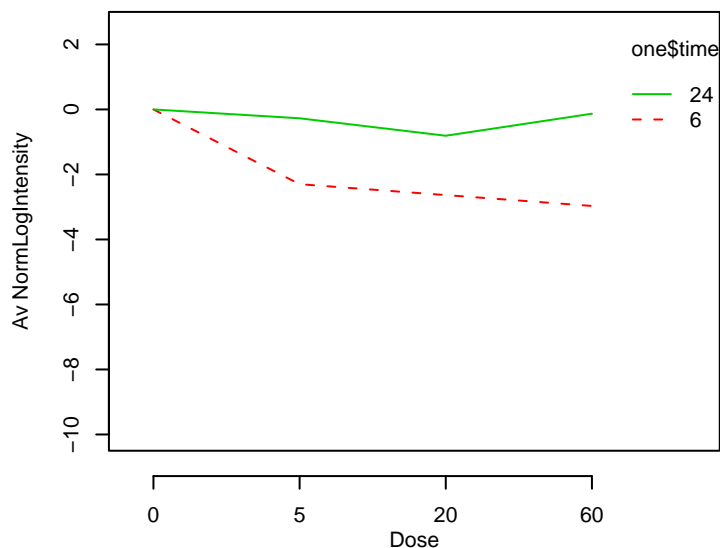

**GO\_0042398 : amino acid derivative biosynthesis**

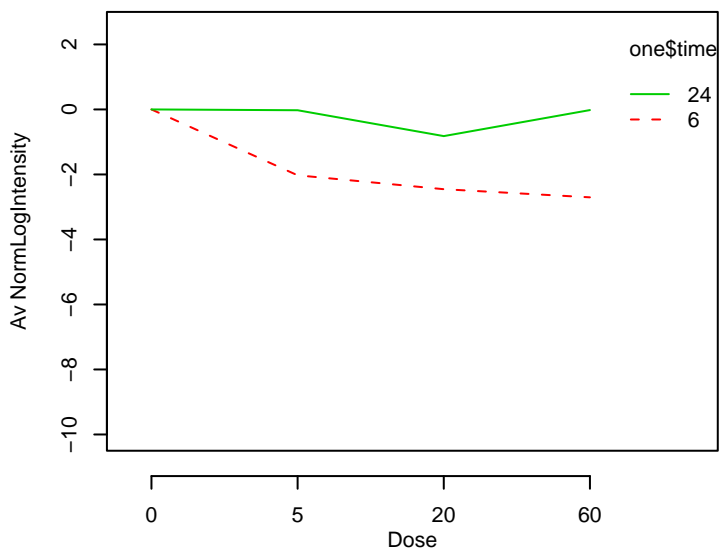

**GO\_0042401 : biogenic amine biosynthesis**

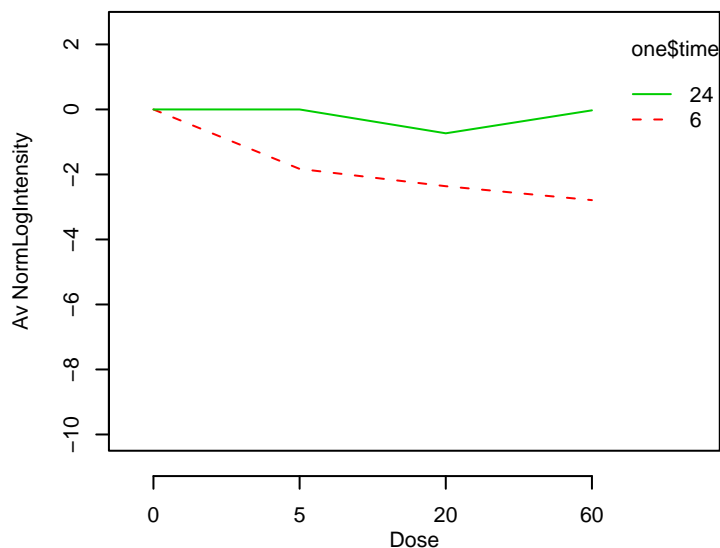

**GO\_0042402 : biogenic amine catabolism**

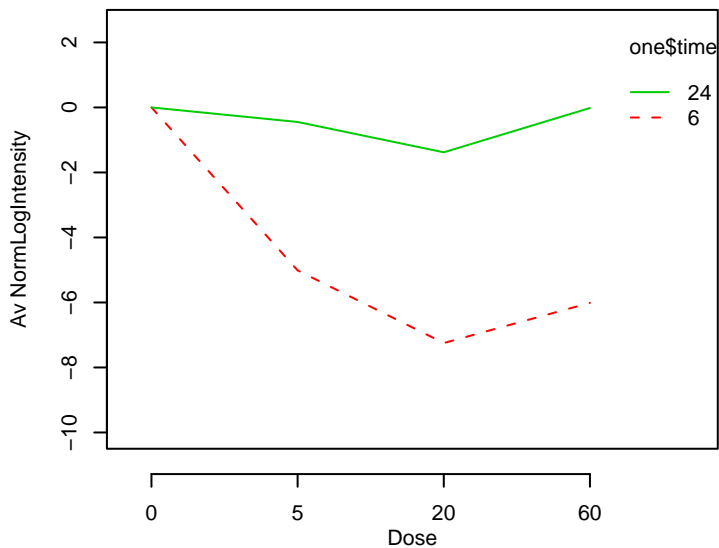

**GO\_0042403 : thyroid hormone metabolism**

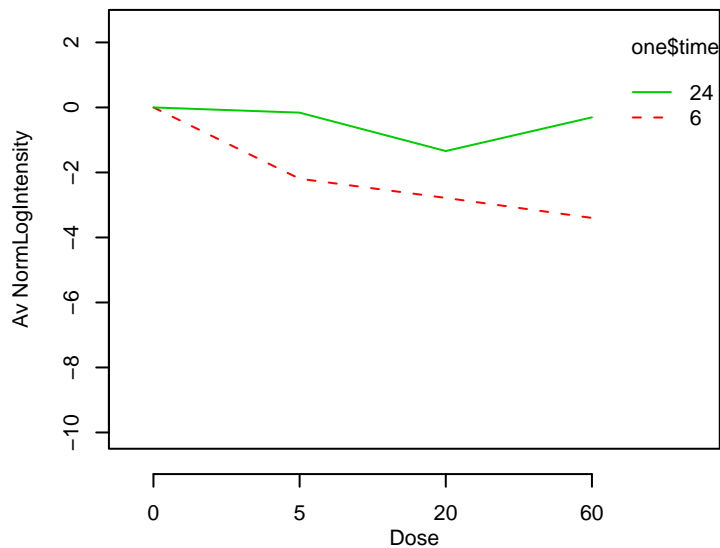

**GO\_0042417 : dopamine metabolism**

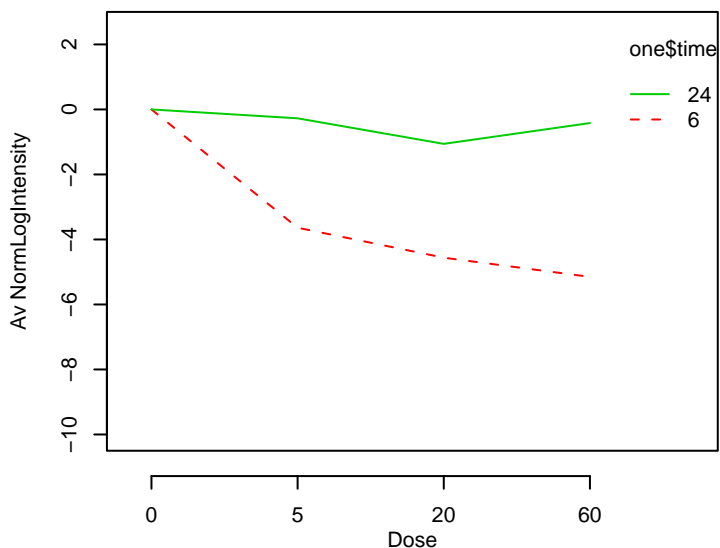

**GO\_0042423 : catecholamine biosynthesis**

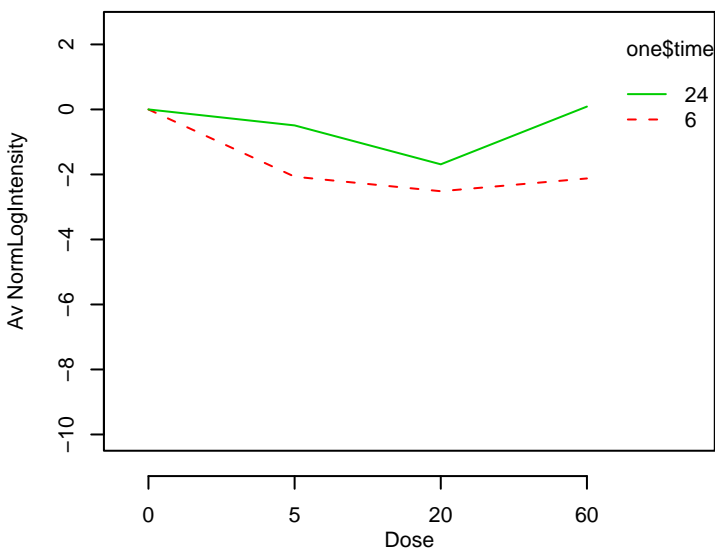

**GO\_0042430 : indole and derivative metabolism**

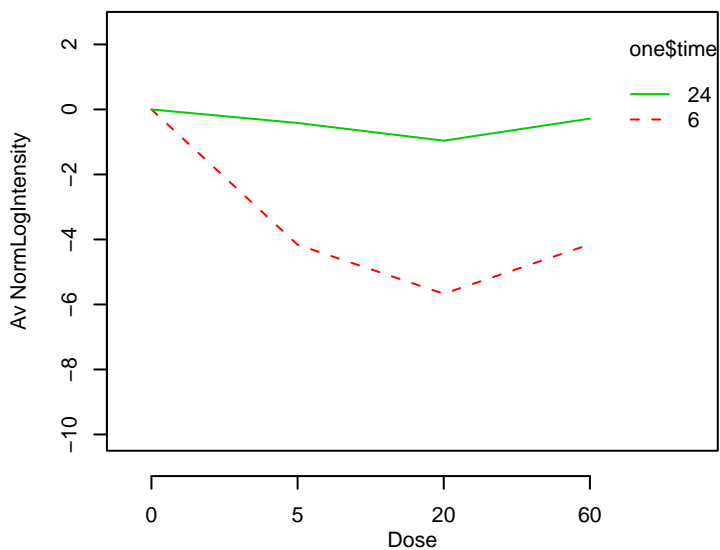

**GO\_0042434 : indole derivative metabolism**

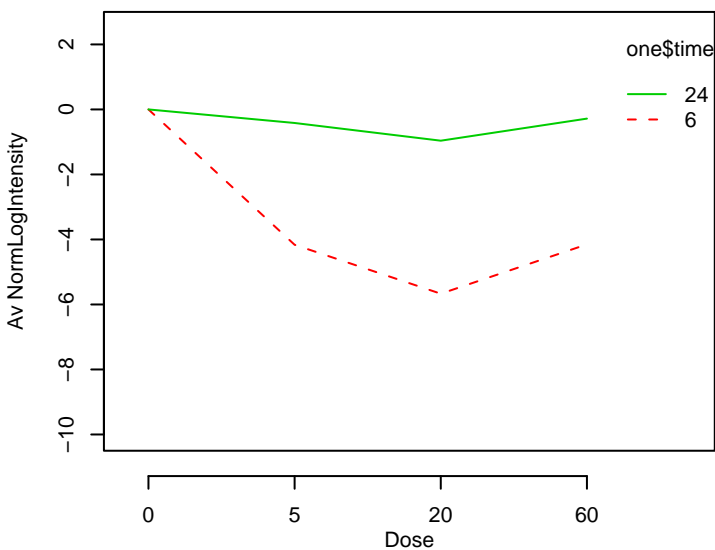

**GO\_0042438 : melanin biosynthesis**

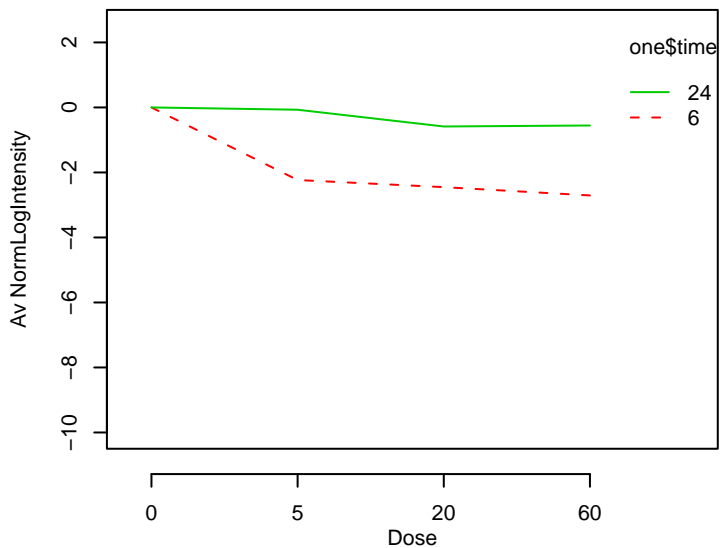

**GO\_0042439 : ethanolamine and derivative metabolism**

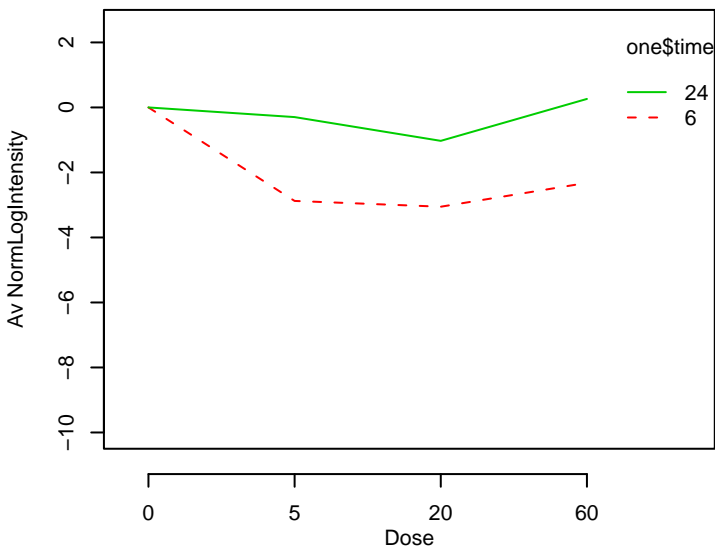

**GO\_0042440 : pigment metabolism**

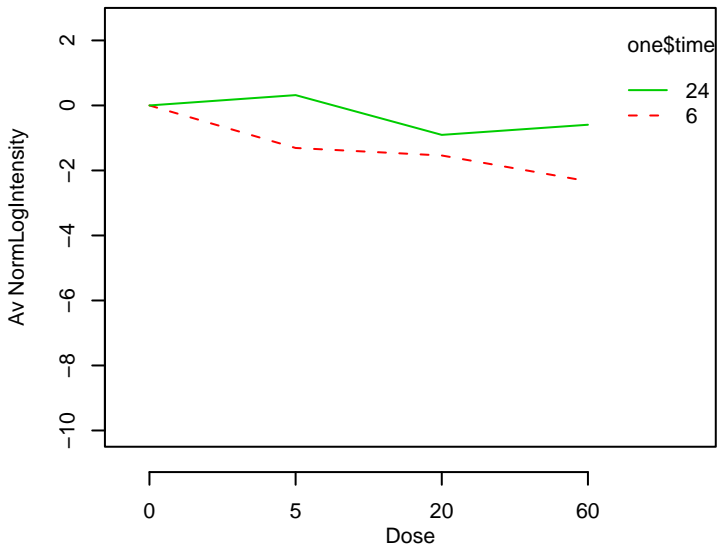

**GO\_0042445 : hormone metabolism**

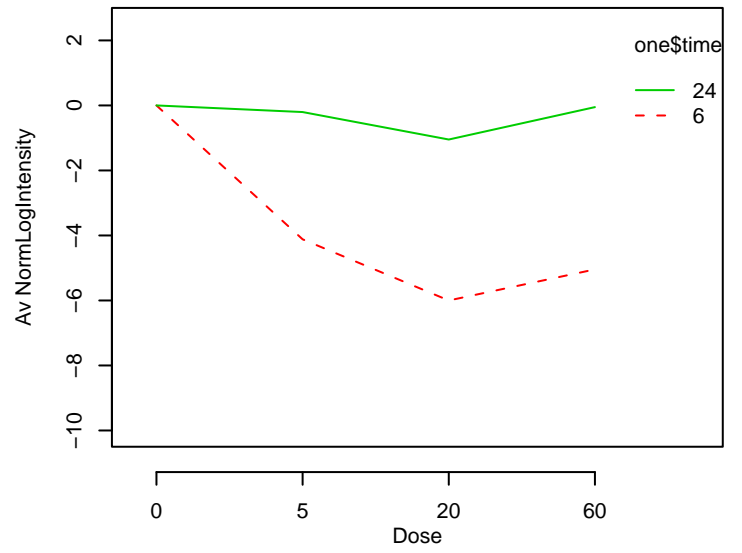

**GO\_0042446 : hormone biosynthesis**

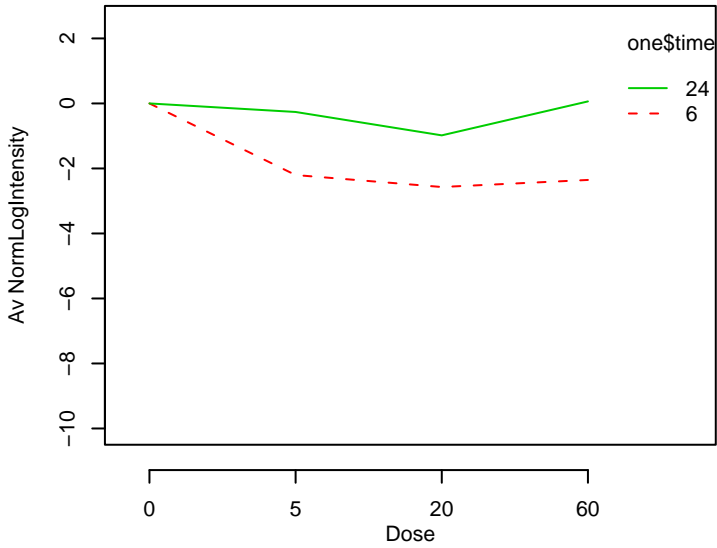

**GO\_0042461 : photoreceptor cell development**

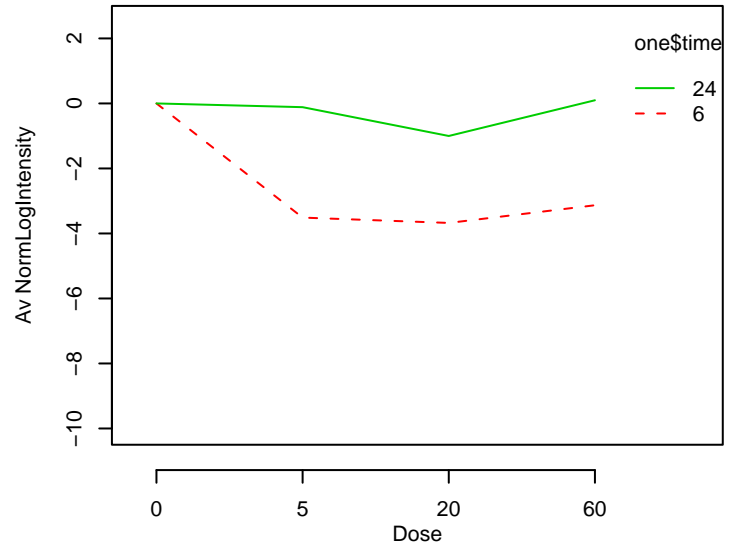

**GO\_0042462 : eye photoreceptor cell development**

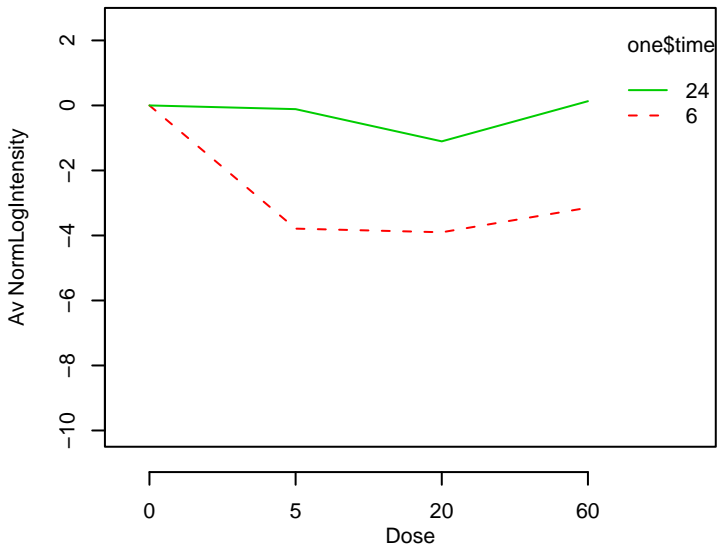

**GO\_0042471 : ear morphogenesis**

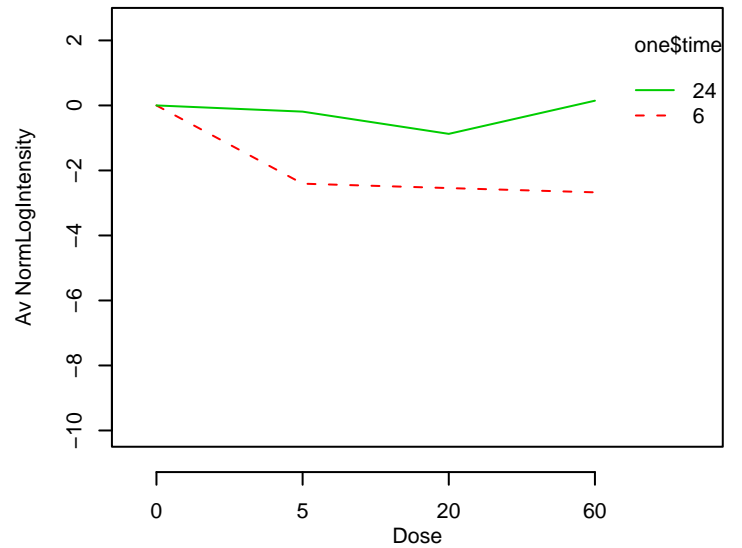

**GO\_0042472 : inner ear morphogenesis**

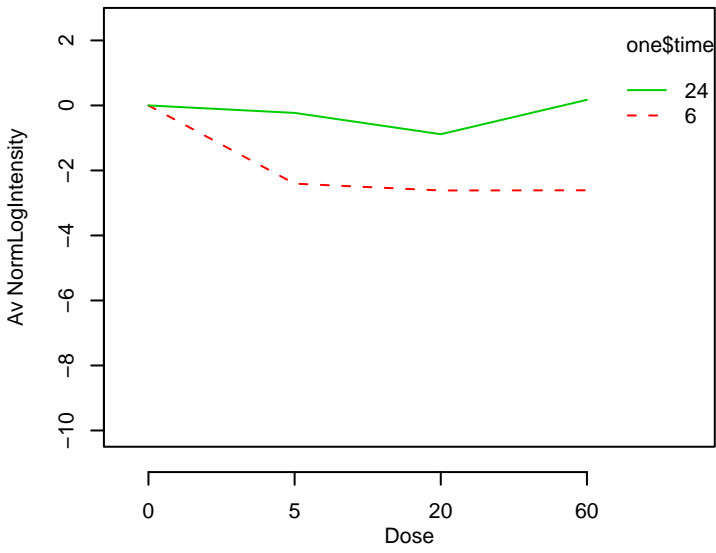

**GO\_0042475 : odontogenesis (sensu Vertebrata)**

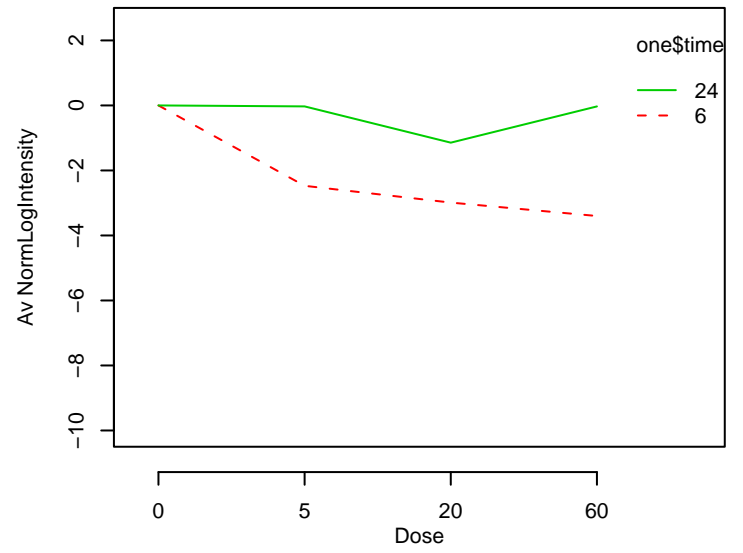

**GO\_0042476 : odontogenesis**

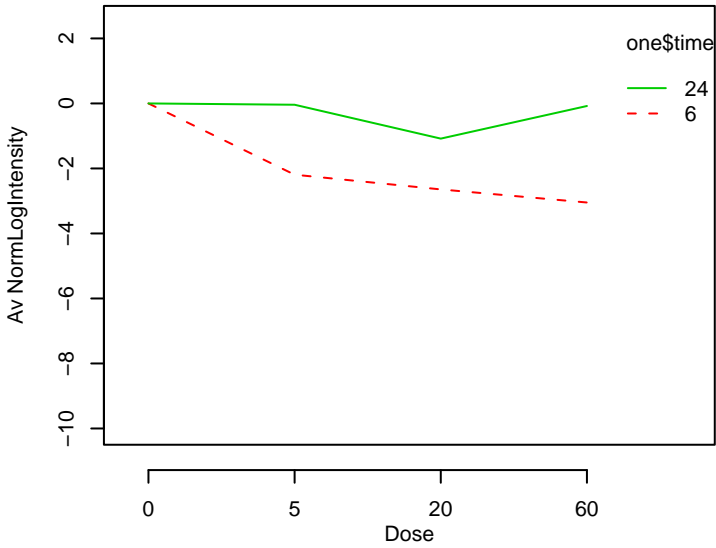

**GO\_0042490 : mechanoreceptor differentiation**

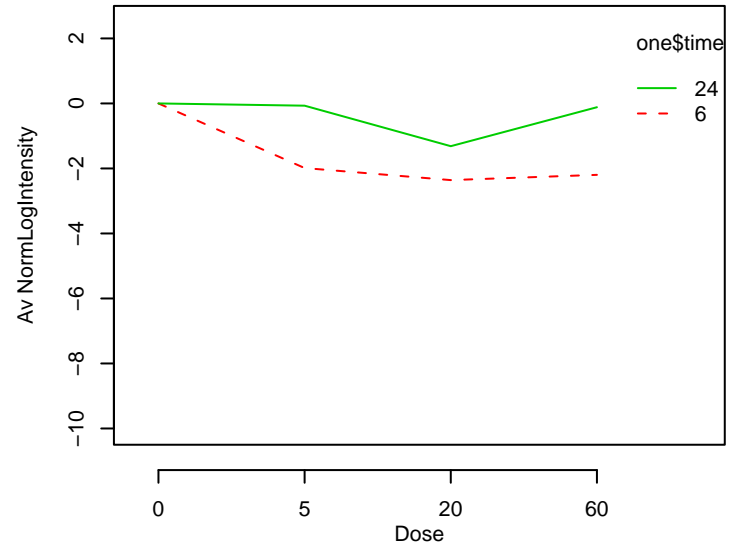

**GO\_0042491 : auditory receptor cell differentiation**

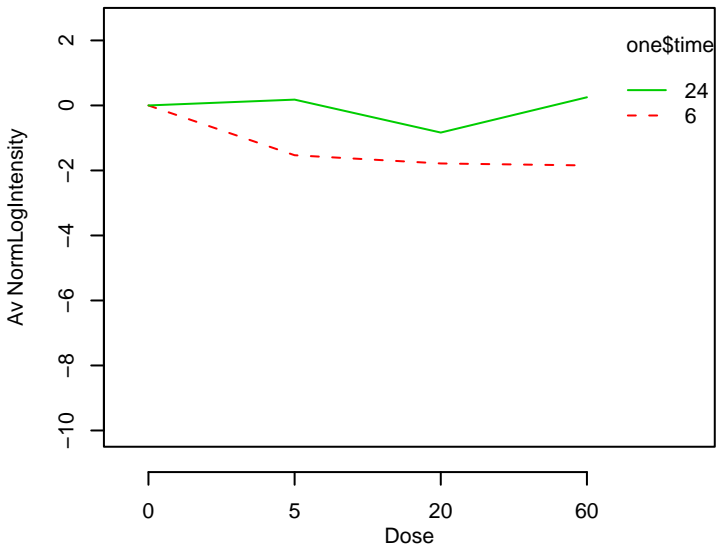

**GO\_0042493 : response to drug**

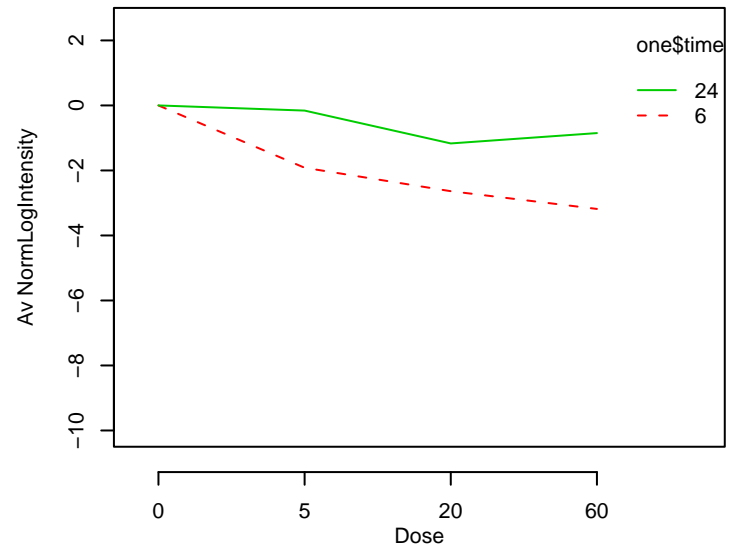

**GO\_0042503 : tyrosine phosphorylation of Stat3 protein** **GO\_0042509 : regulation of tyrosine phosphorylation of STAT**

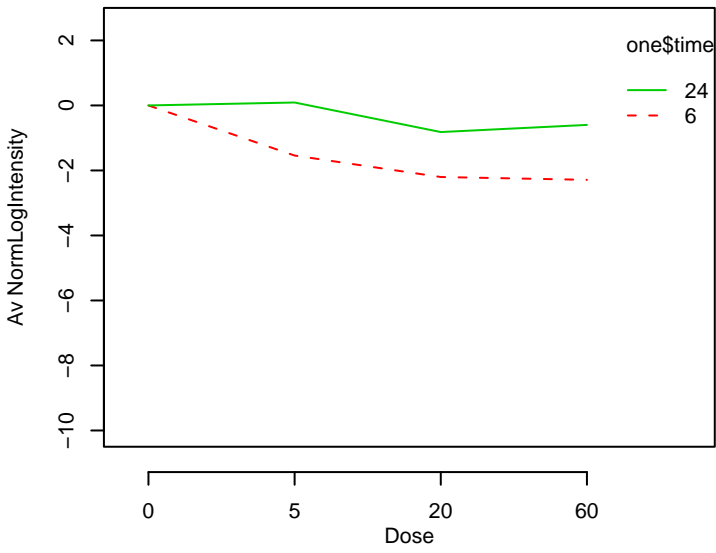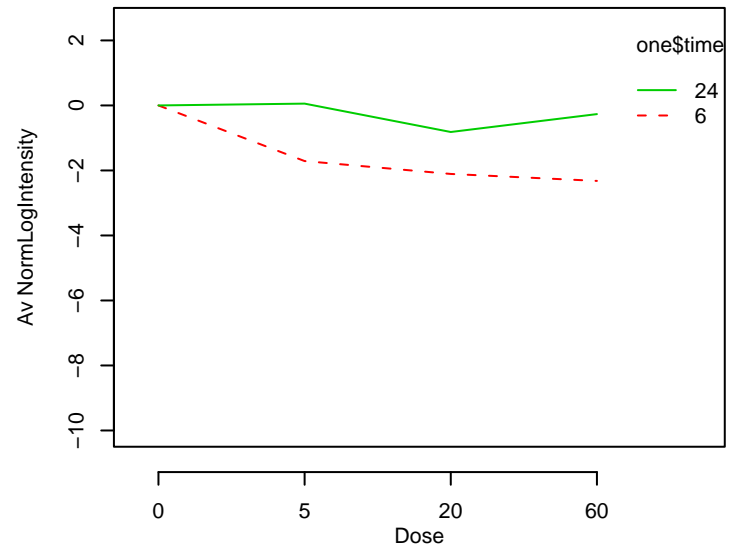

**GO\_0042516 : regulation of tyrosine phosphorylation of Stat** **GO\_0042531 : positive regulation of tyrosine phosphorylation**

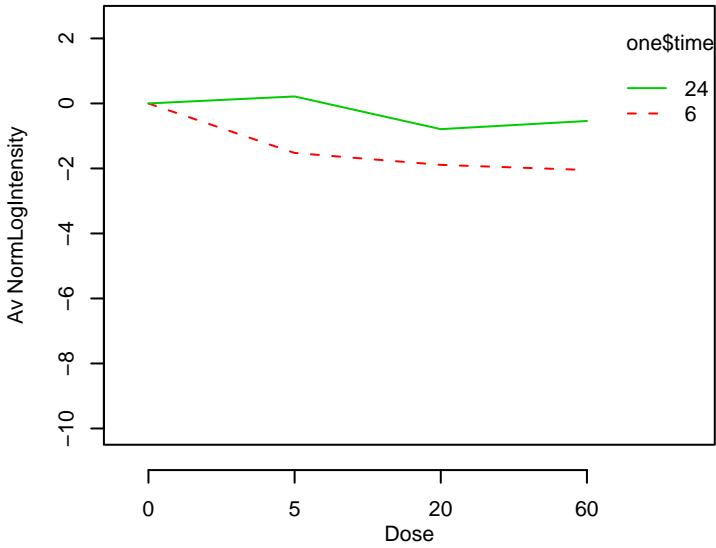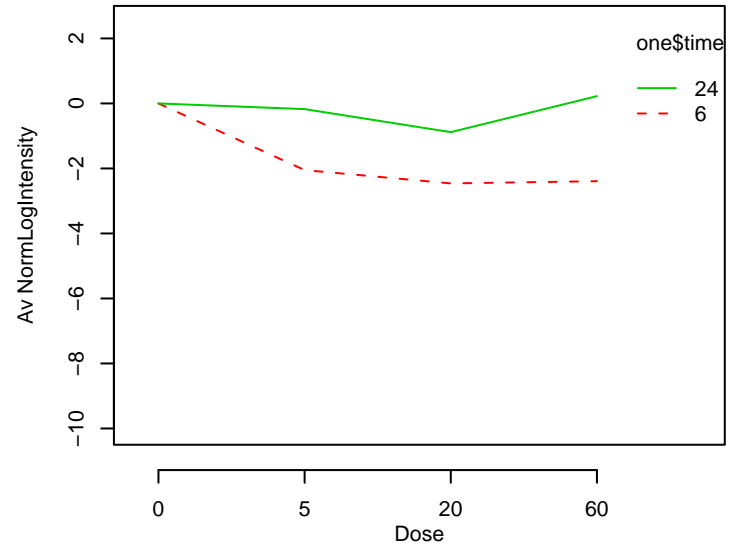

**GO\_0042533 : tumor necrosis factor-alpha biosynthesis** **GO\_0042534 : regulation of tumor necrosis factor-alpha biosynthesis**

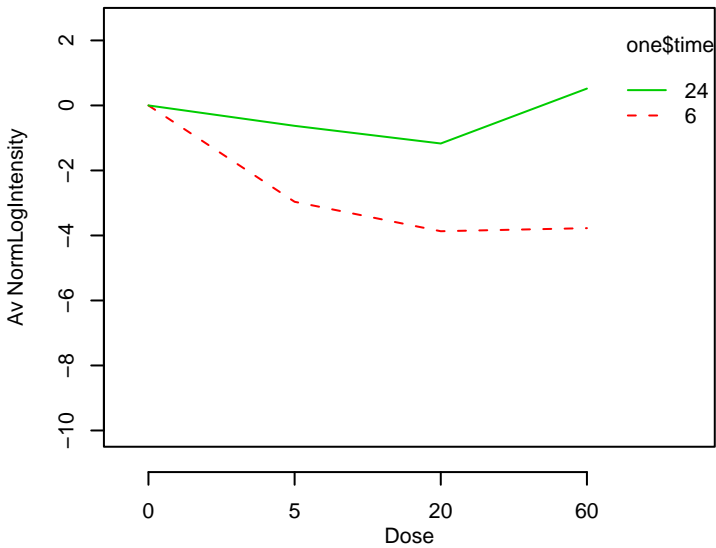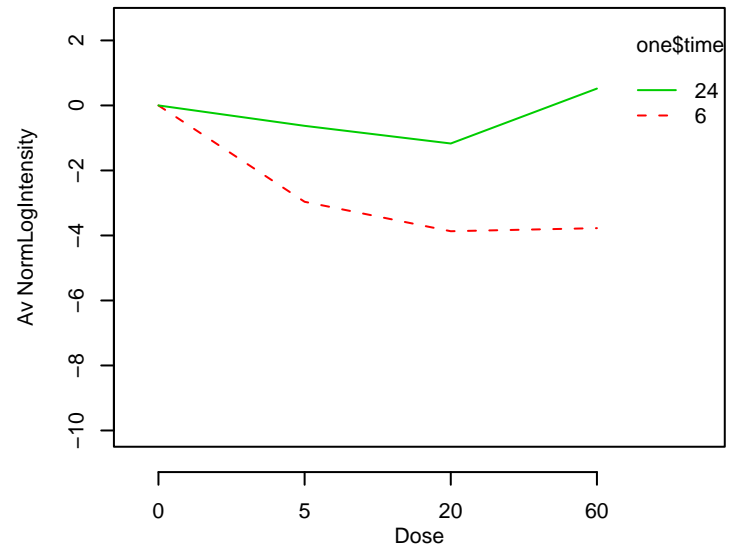

**GO\_0042535 : positive regulation of tumor necrosis factor- $\alpha$**

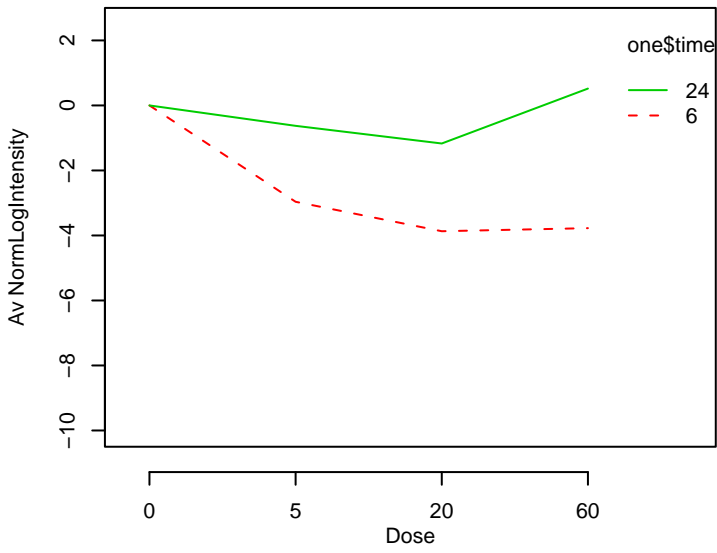

**GO\_0042541 : hemoglobin biosynthesis**

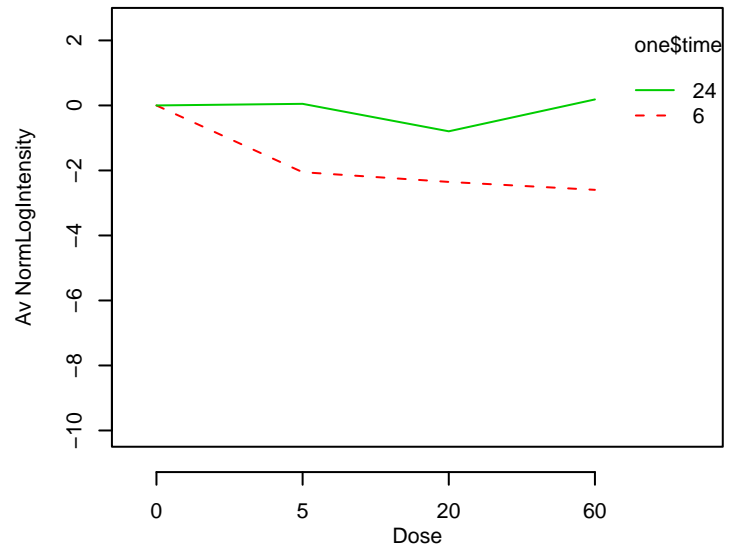

**GO\_0042542 : response to hydrogen peroxide**

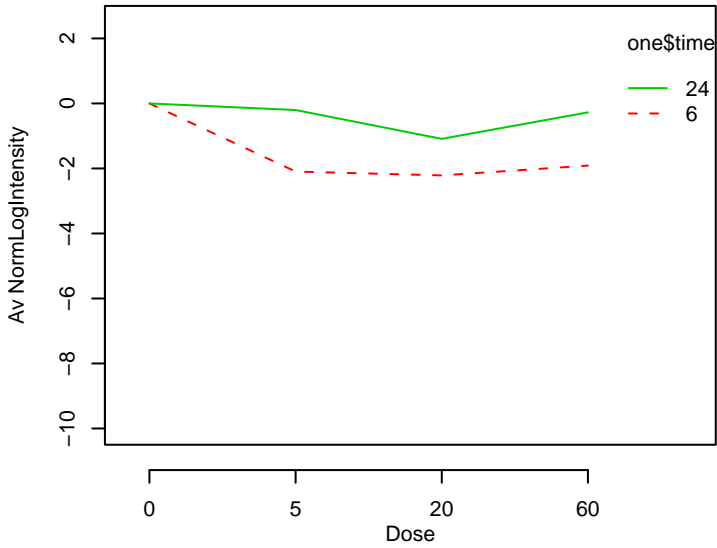

**GO\_0042551 : neuron maturation**

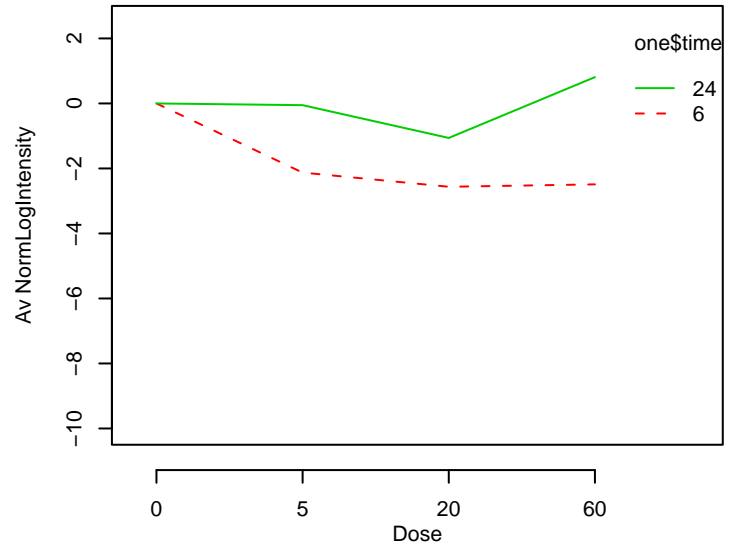

**GO\_0042552 : myelination**

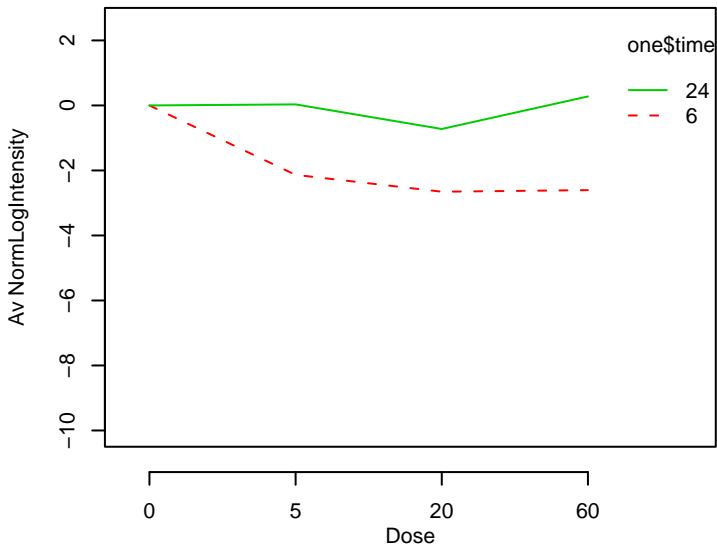

**GO\_0042554 : superoxide release**

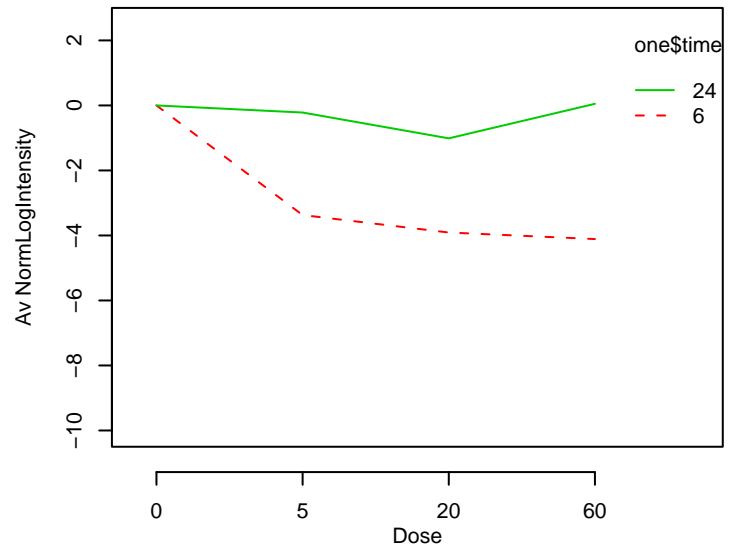

**GO\_0042558 : pteridine and derivative metabolism**

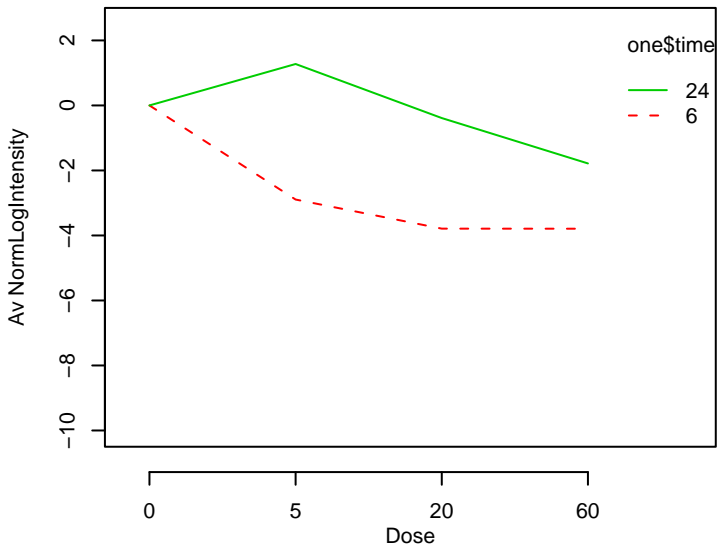

**GO\_0042559 : pteridine and derivative biosynthesis**

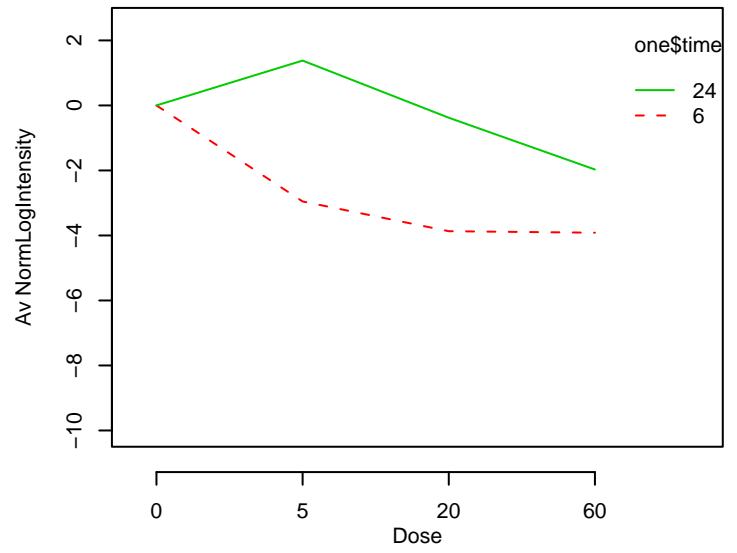

**GO\_0042572 : retinol metabolism**

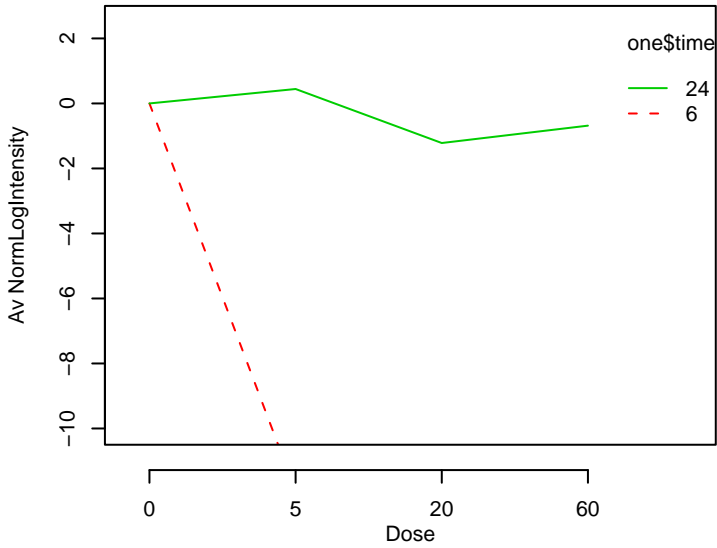

**GO\_0042573 : retinoic acid metabolism**

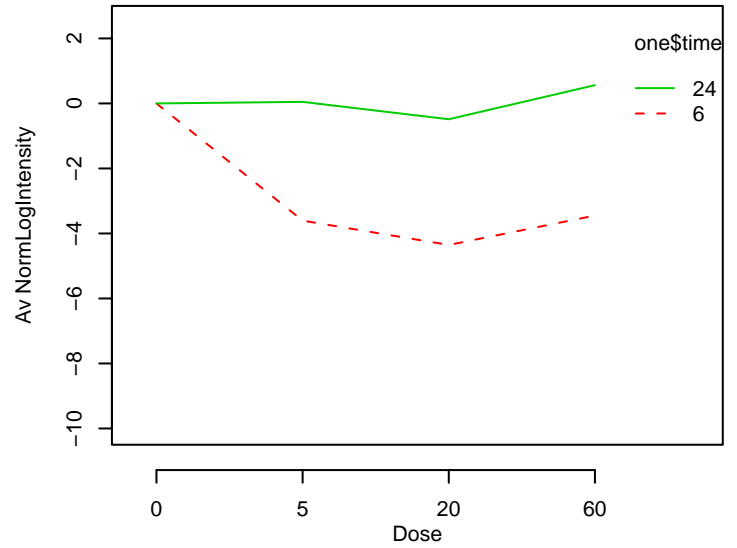

**GO\_0042593 : glucose homeostasis**

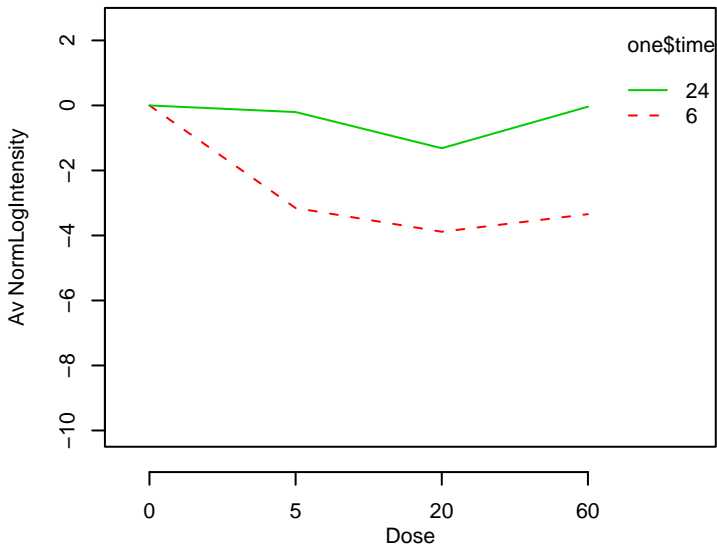

**GO\_0042594 : response to starvation**

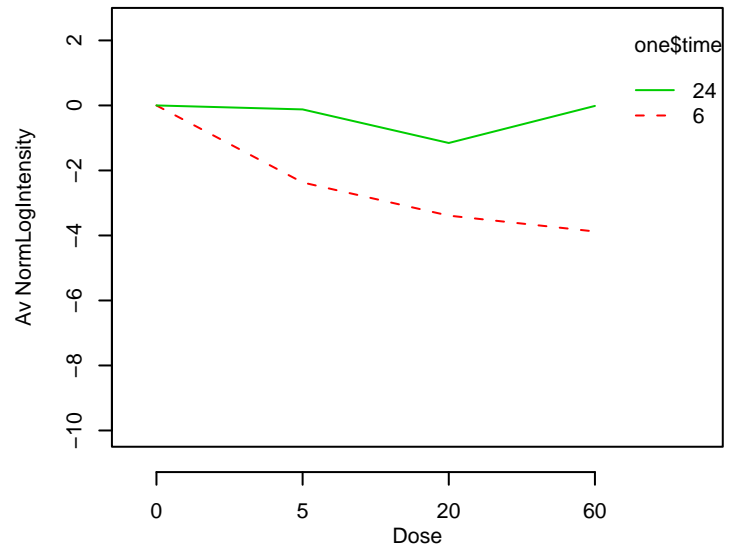



**GO\_0042596 : fear response**

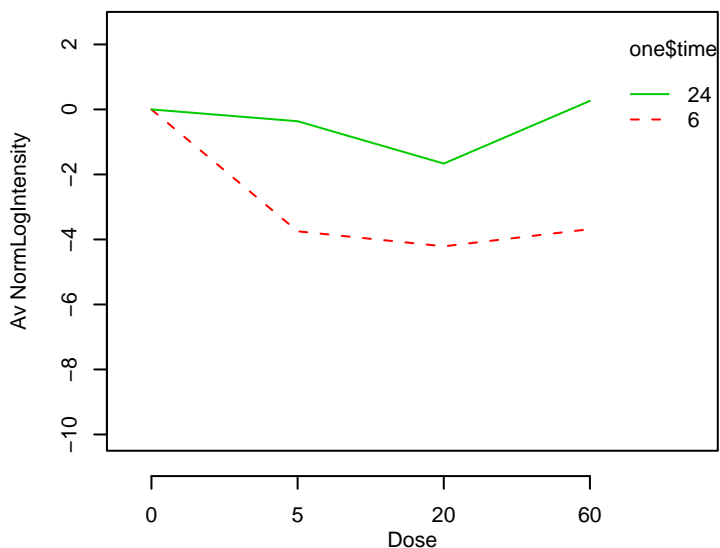

**GO\_0042632 : cholesterol homeostasis**

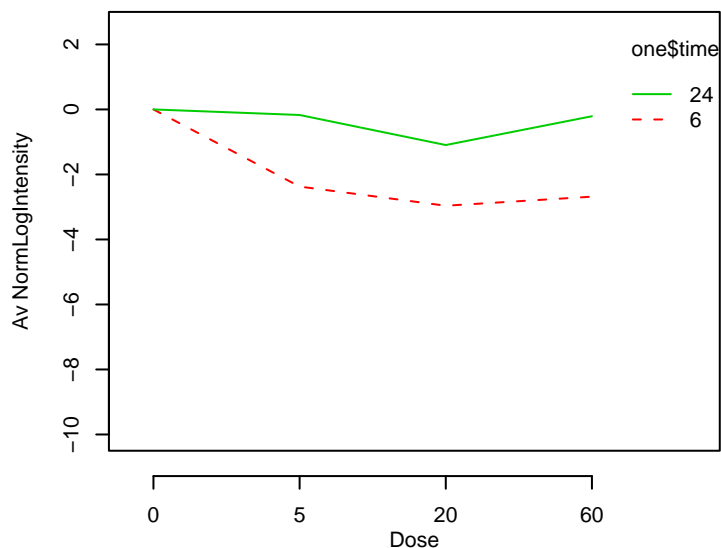

**GO\_0042633 : hair cycle**

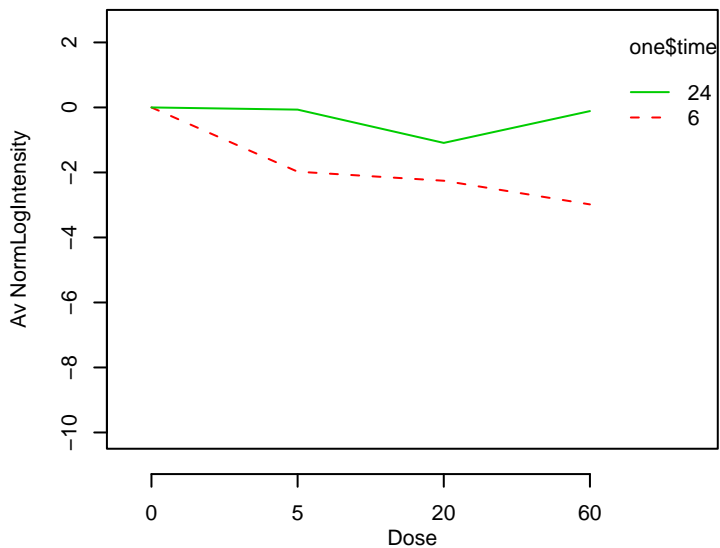

**GO\_0042640 : anagen**

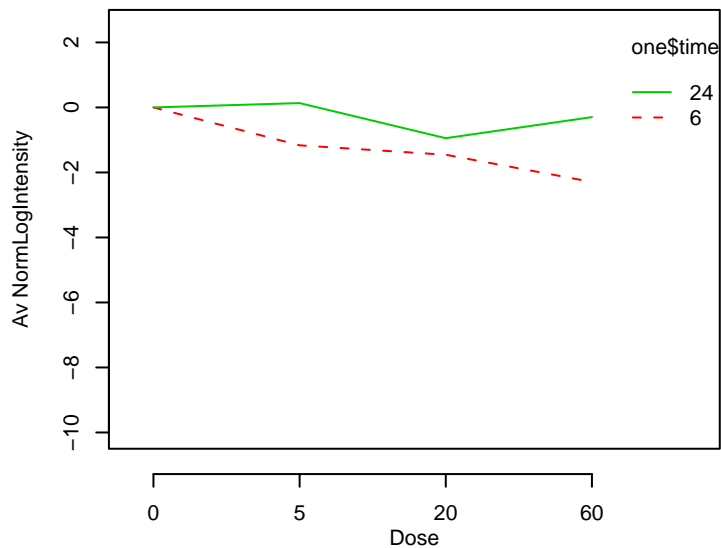

**GO\_0042692 : muscle cell differentiation**

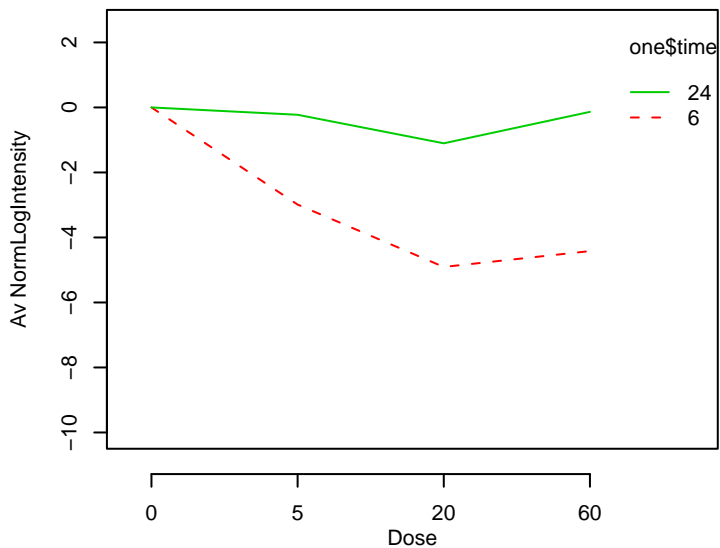

**GO\_0042698 : menstrual cycle**

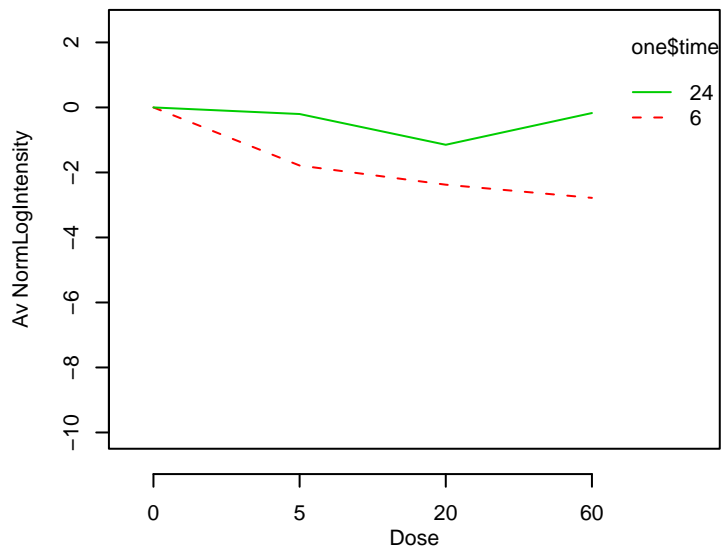

**GO\_0042730 : fibrinolysis**

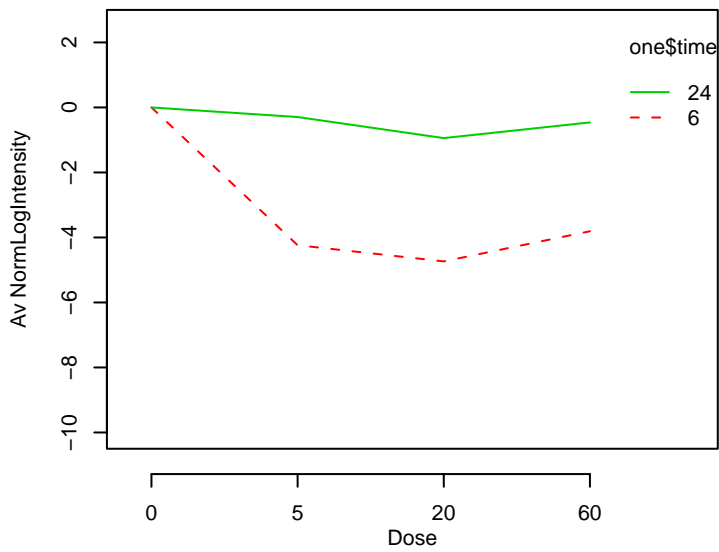

**GO\_0042733 : embryonic digit morphogenesis**

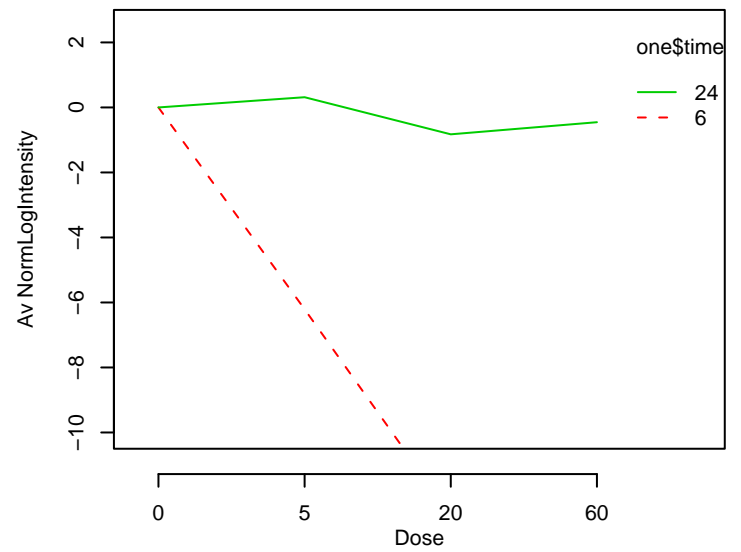

**GO\_0042742 : defense response to bacterium**

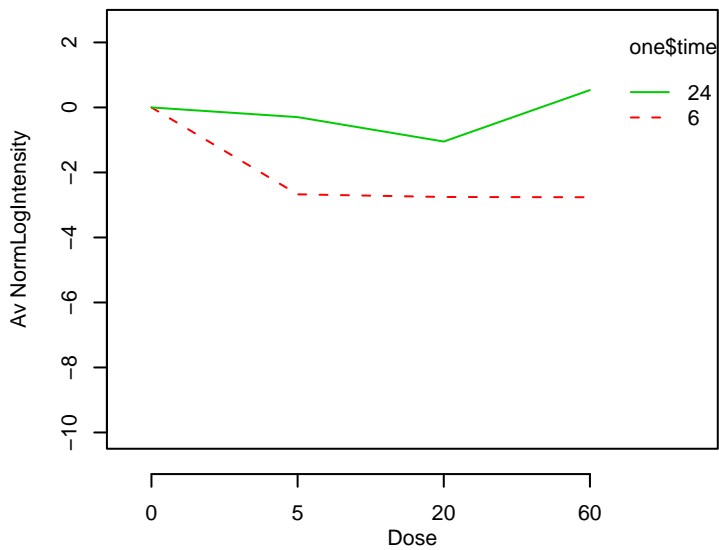

**GO\_0042743 : hydrogen peroxide metabolism**

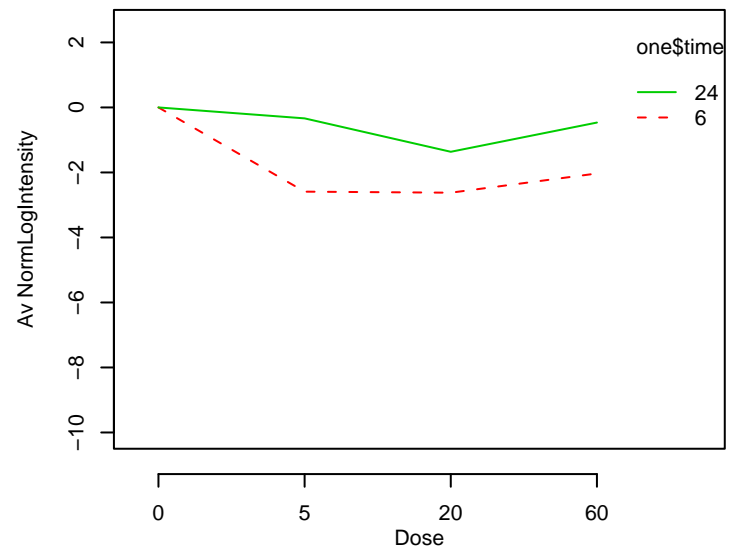

**GO\_0042744 : hydrogen peroxide catabolism**

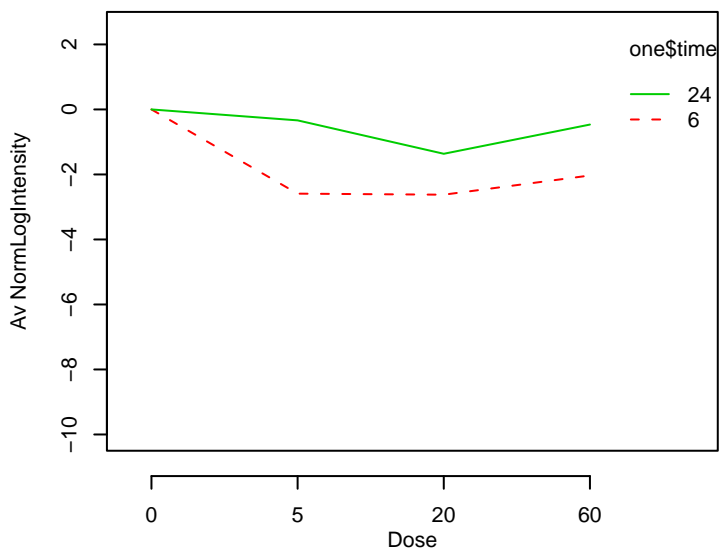

**GO\_0042755 : eating behavior**

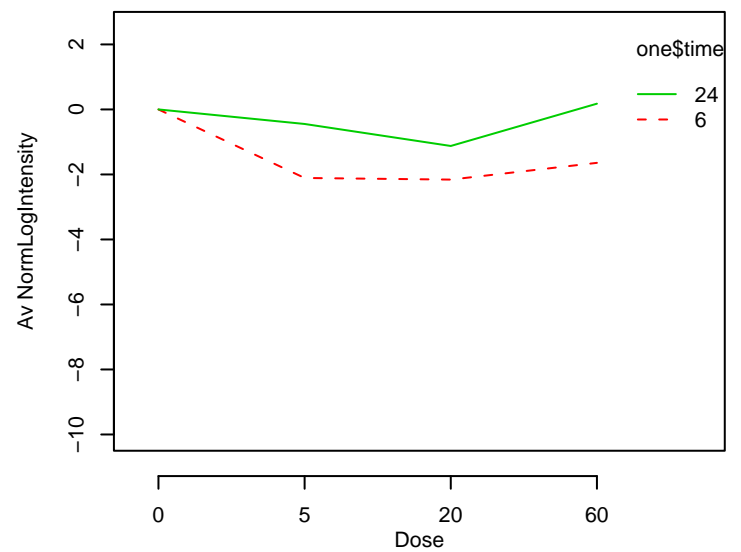

GO\_0042769 : DNA damage response, detection of DNA damage

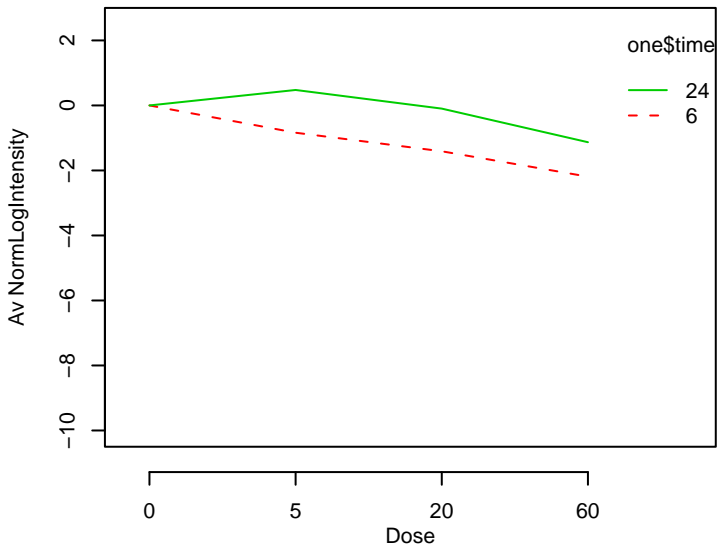

GO\_0042770 : DNA damage response, signal transduction

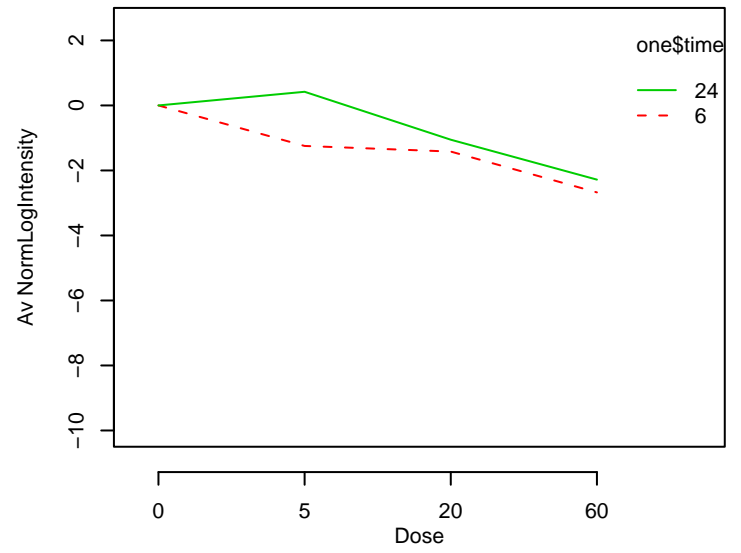

O\_0042771 : DNA damage response, signal transduction by

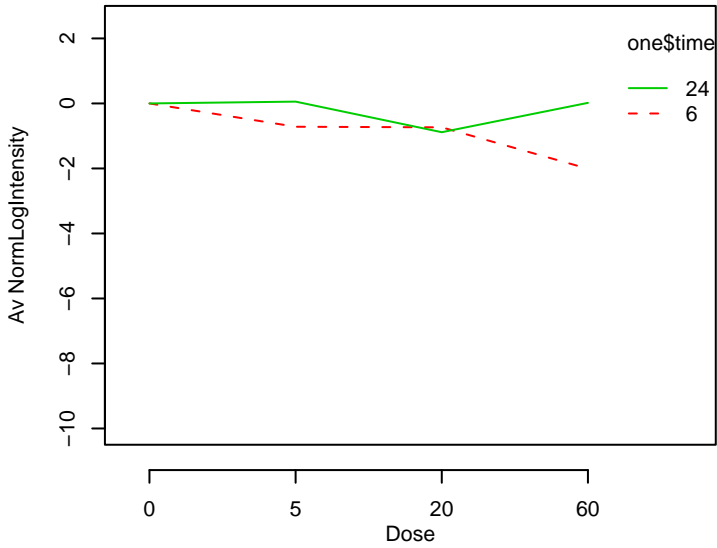

GO\_0042773 : ATP synthesis coupled electron transport

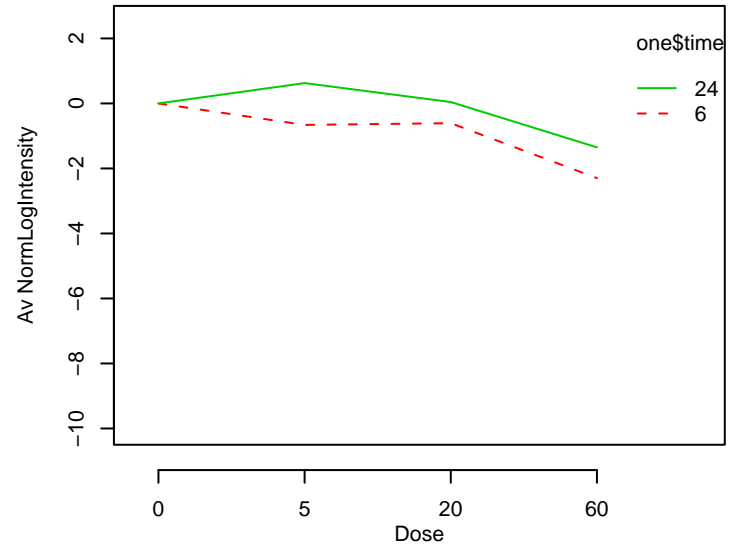

GO\_0042775 : ATP synthesis coupled electron transport (sensGO\_0042787 : protein ubiquitination during ubiquitin-dependent

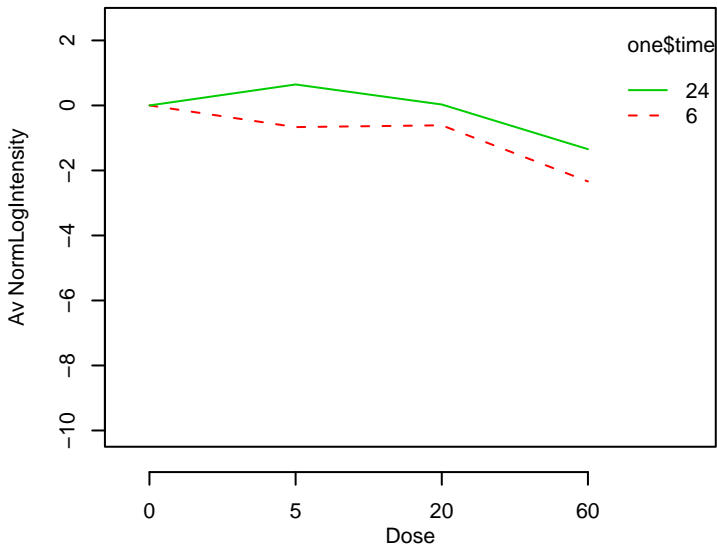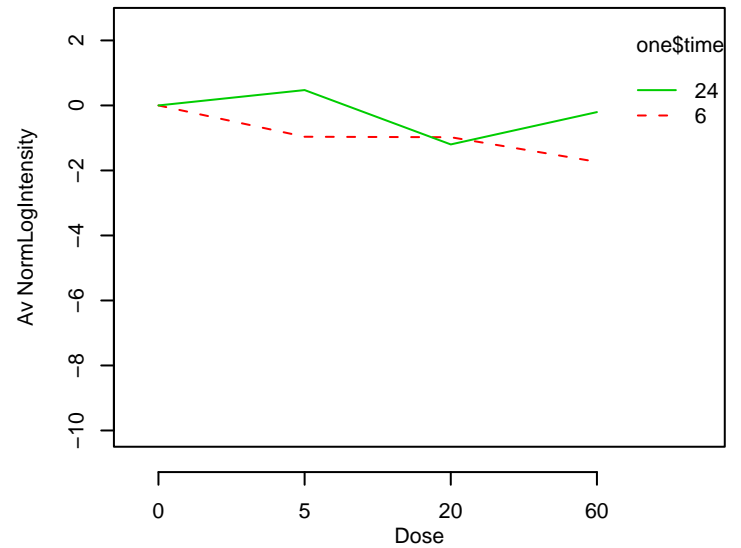

**GO\_0042982 : amyloid precursor protein metabolism**

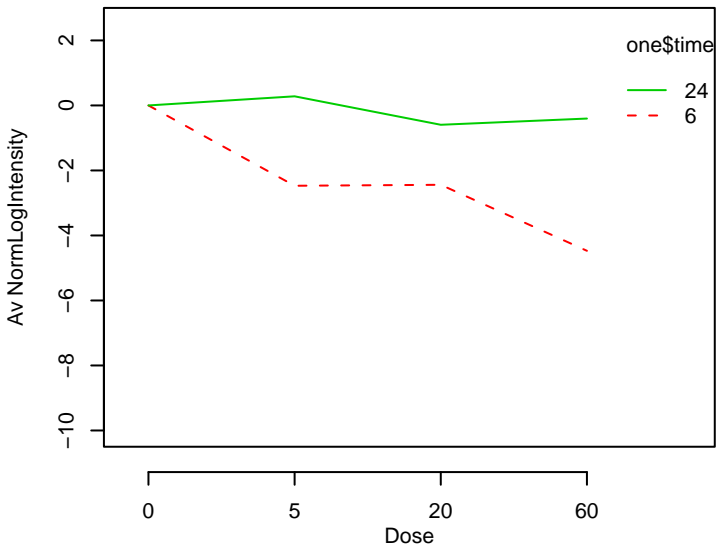

**GO\_0042987 : amyloid precursor protein catabolism**

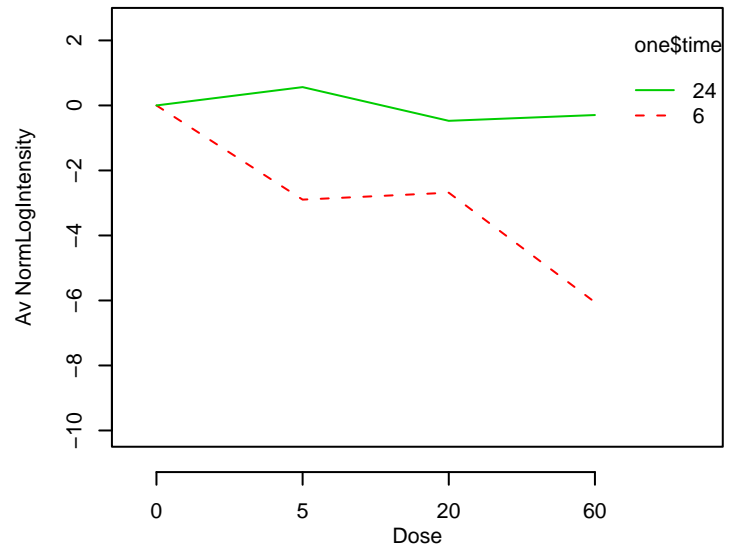

**GO\_0042990 : regulation of transcription factor import into nucleus**

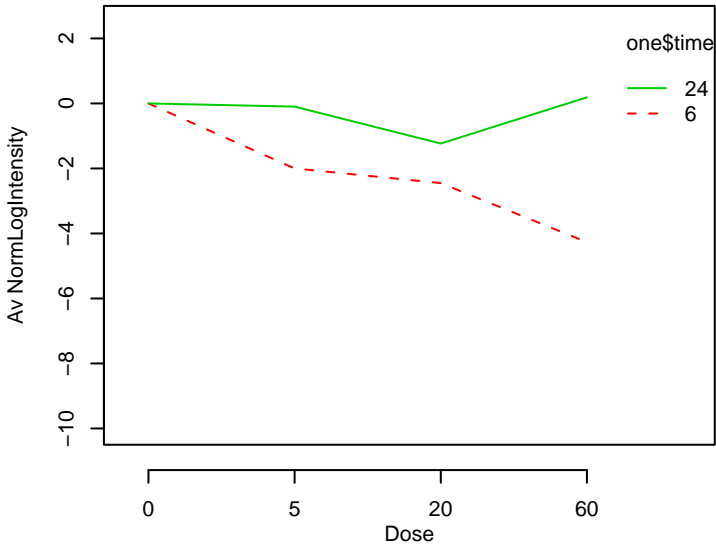

**GO\_0042991 : transcription factor import into nucleus**

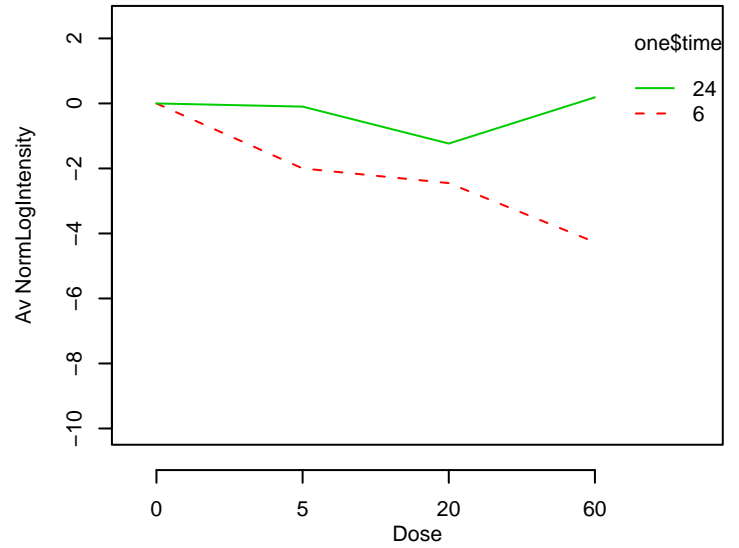

**GO\_0042992 : negative regulation of transcription factor import into nucleus**

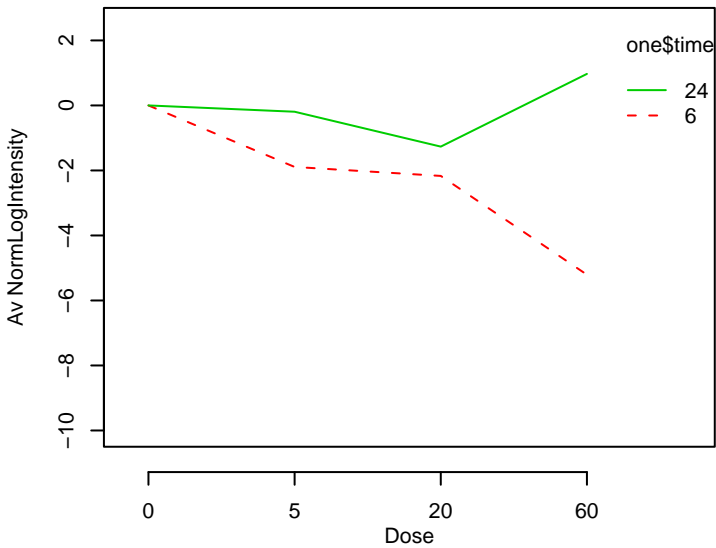

**GO\_0042993 : positive regulation of transcription factor import into nucleus**



**GO\_0042994 : cytoplasmic sequestering of transcription fac**

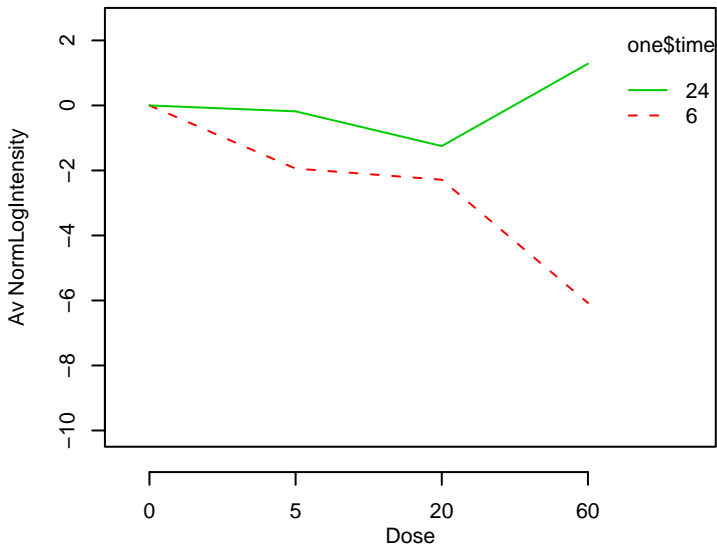

**GO\_0043009 : embryonic development (sensu Vertebrata)**

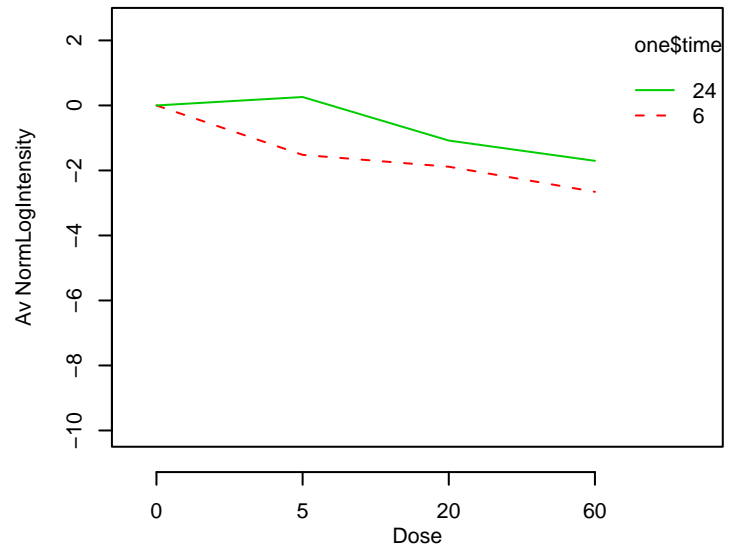

**GO\_0043010 : eye development (sensu Vertebrata)**

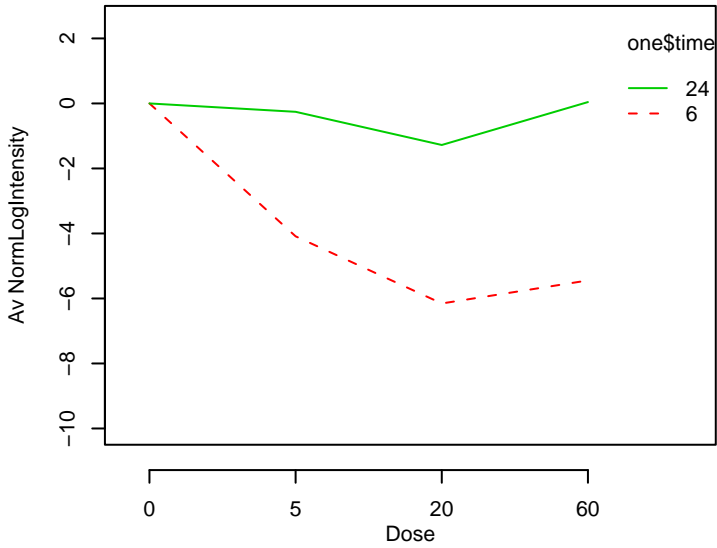

**GO\_0043029 : T cell homeostasis**

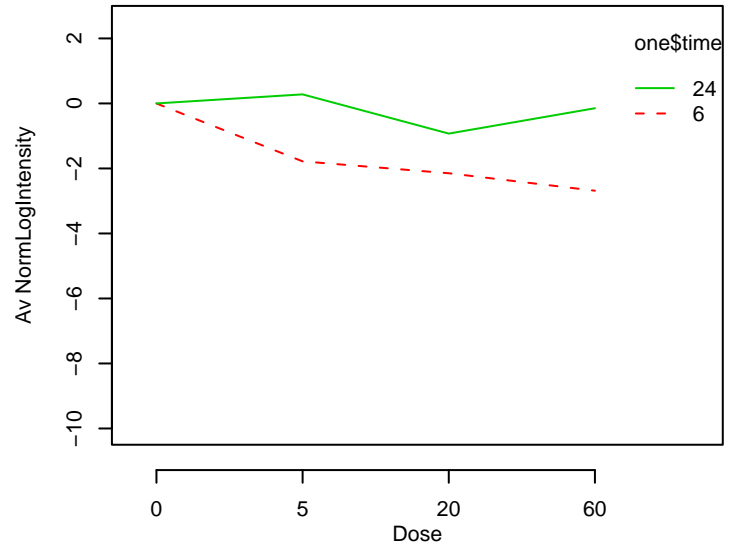

**GO\_0043037 : translation**

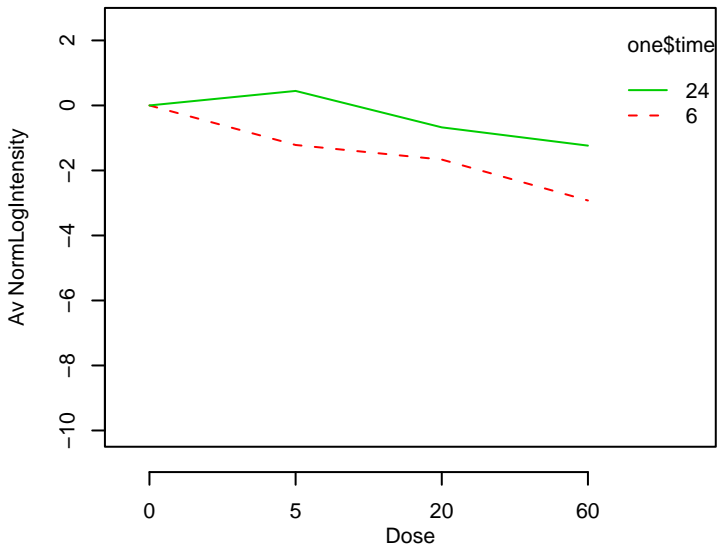

**GO\_0043038 : amino acid activation**

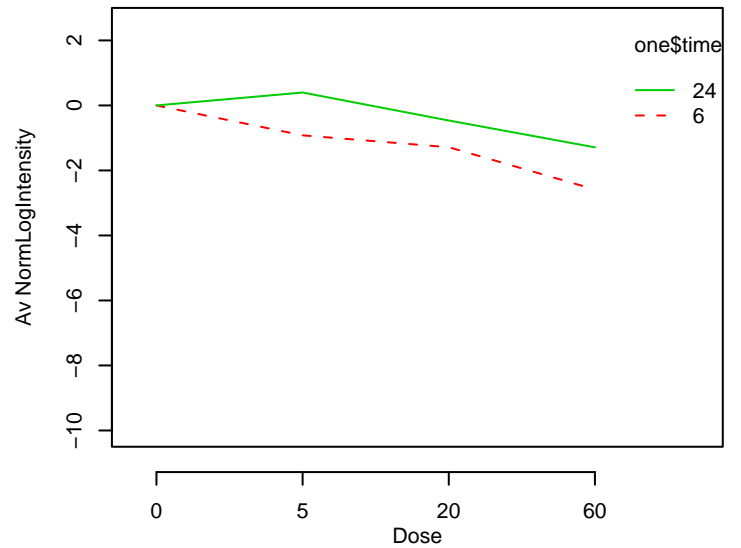

**GO\_0043039 : tRNA aminoacylation**

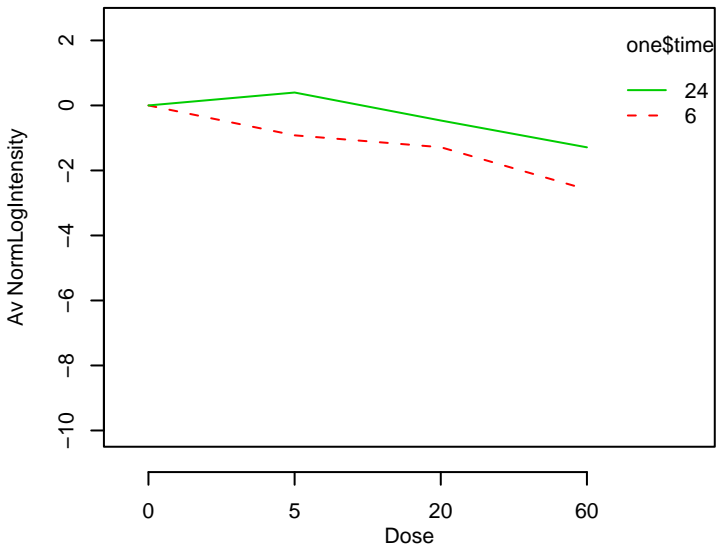

**GO\_0043043 : peptide biosynthesis**

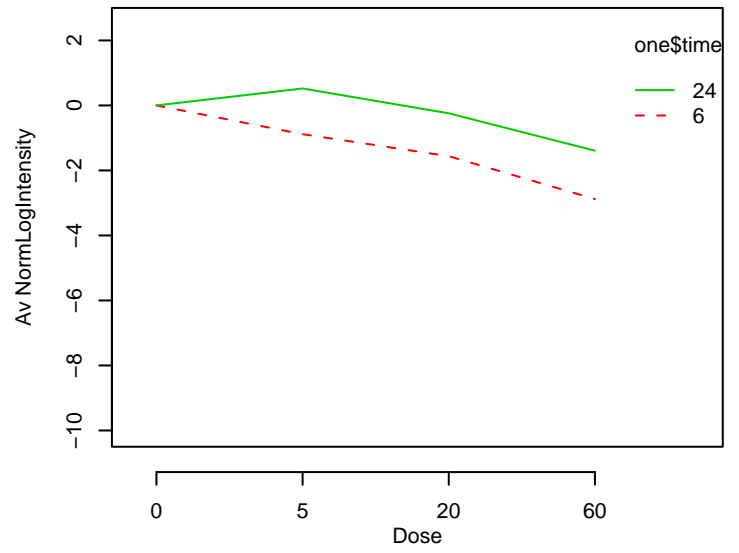

**GO\_0043062 : extracellular structure organization and biogeo**

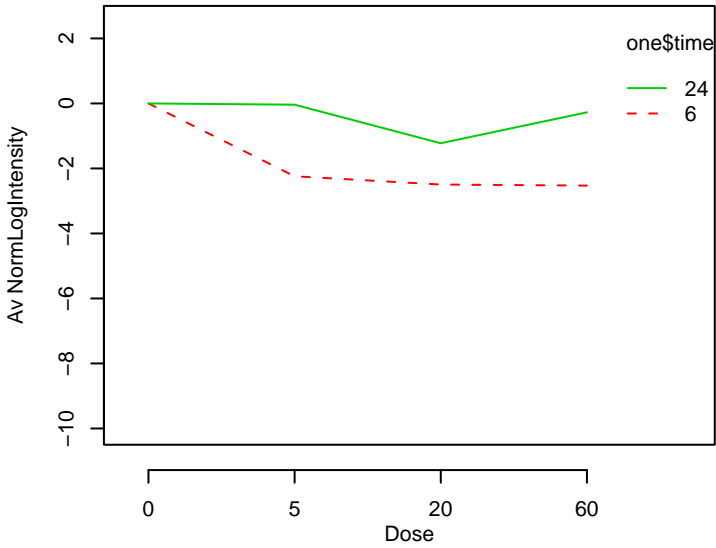

**GO\_0043064 : flagellum organization and biogenesis**

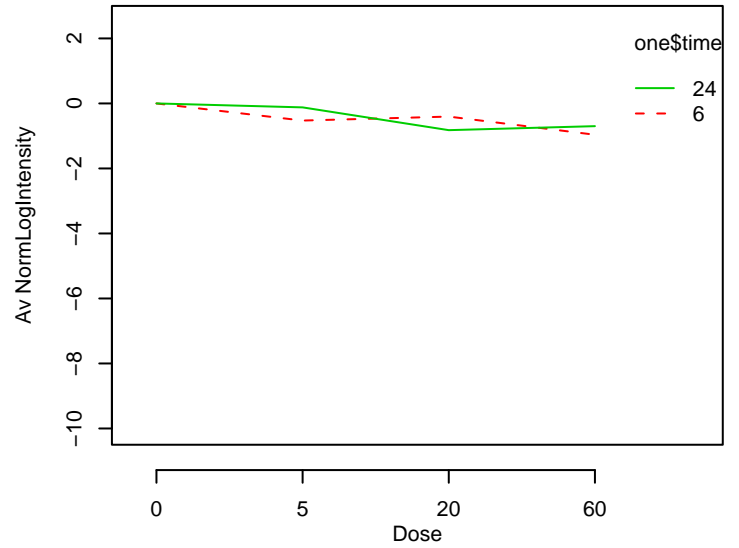

**GO\_0043065 : positive regulation of apoptosis**

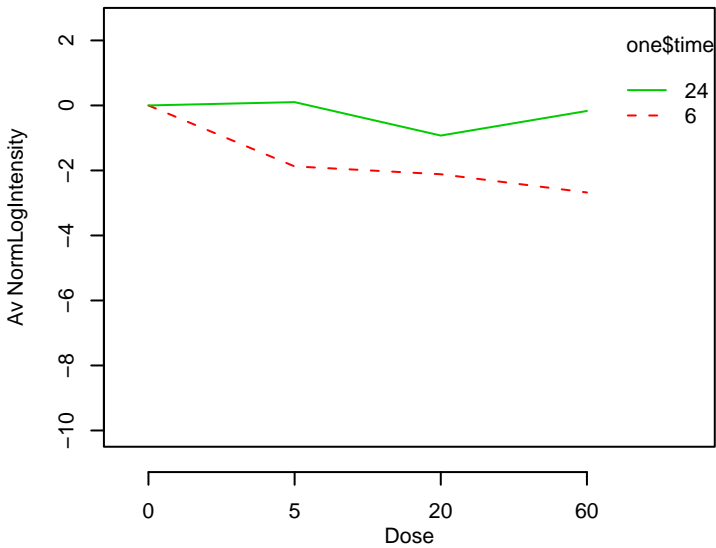

**GO\_0043066 : negative regulation of apoptosis**

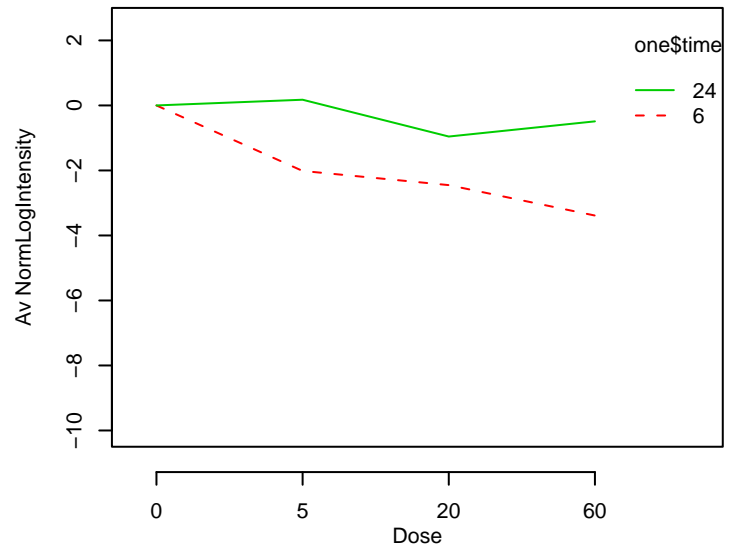

**GO\_0043068 : positive regulation of programmed cell death**

**GO\_0043069 : negative regulation of programmed cell death**

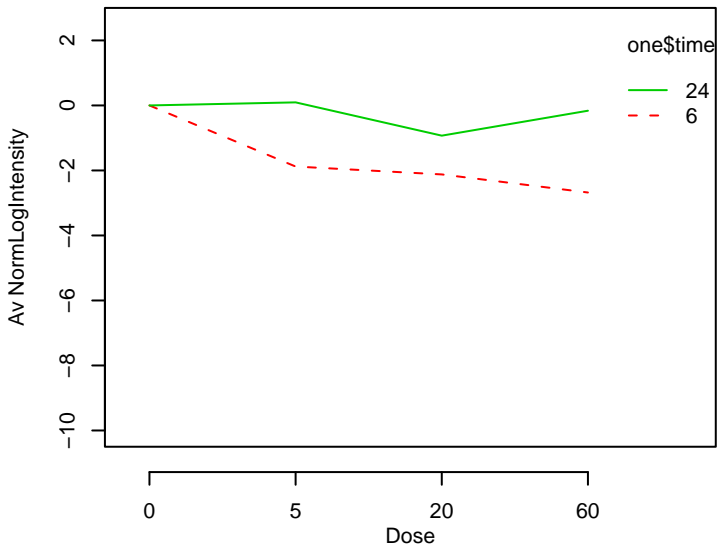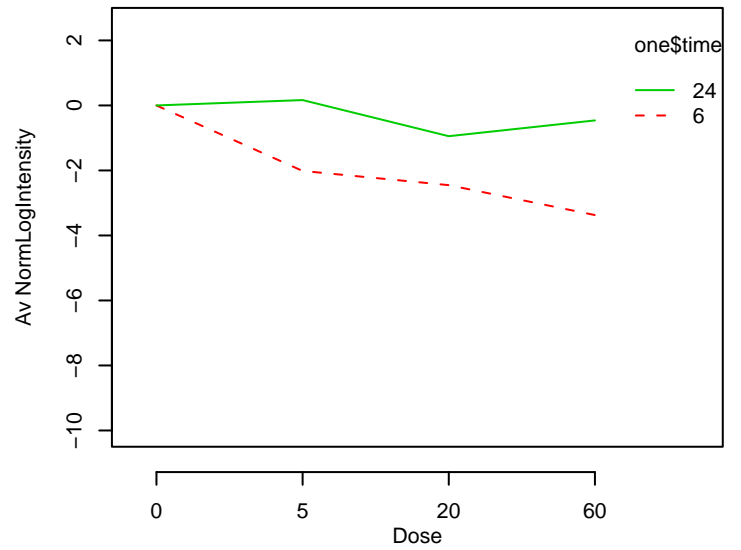

**GO\_0043085 : positive regulation of enzyme activity**

**GO\_0043086 : negative regulation of enzyme activity**

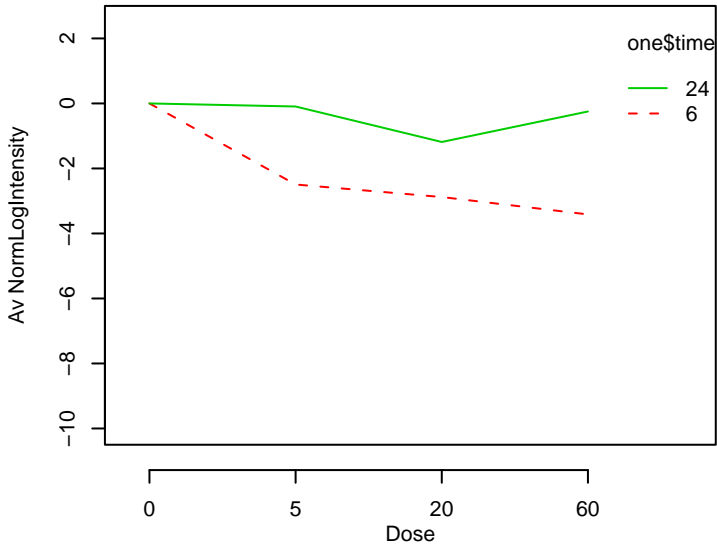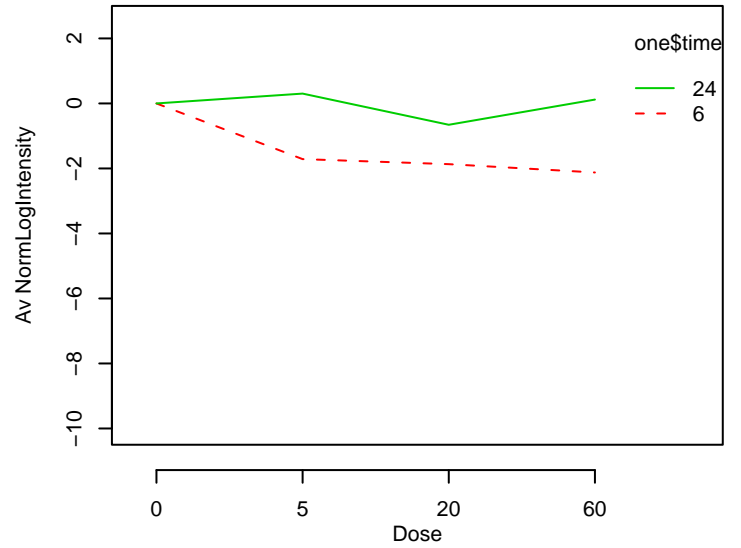

**GO\_0043087 : regulation of GTPase activity**

**GO\_0043088 : regulation of Cdc42 GTPase activity**

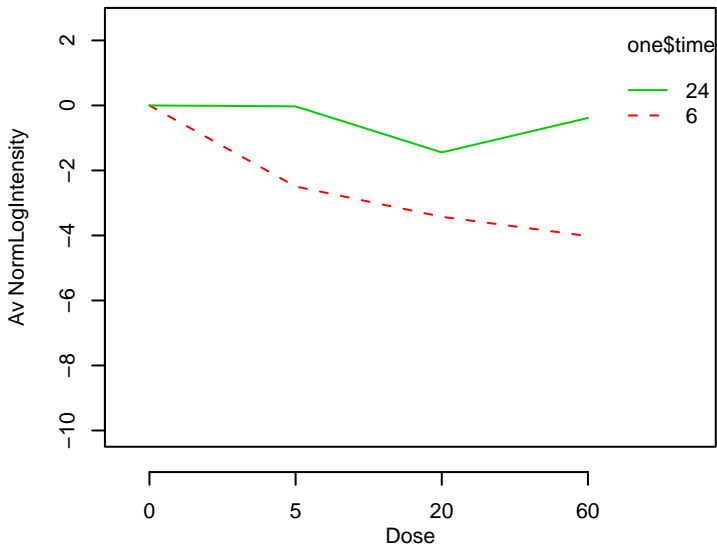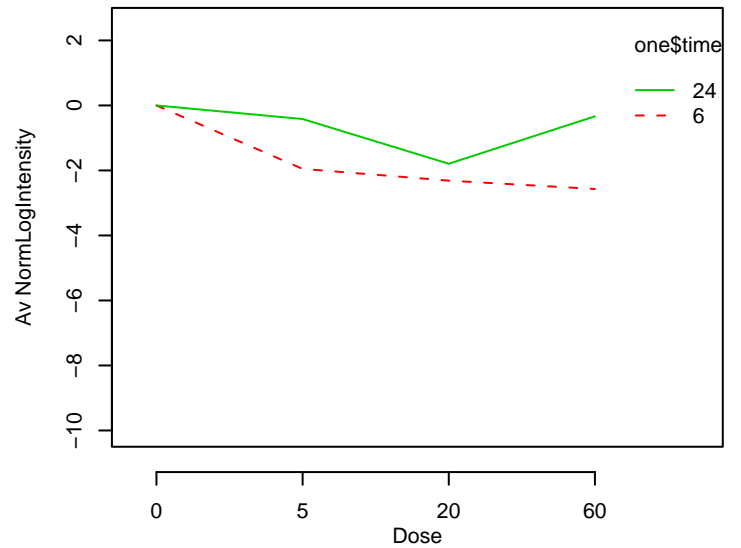

**GO\_0043094 : metabolic compound salvage**

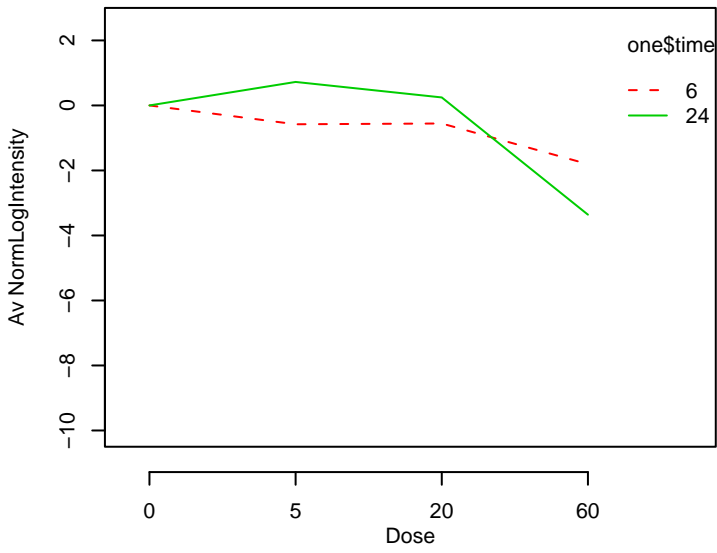

**GO\_0043112 : receptor metabolism**

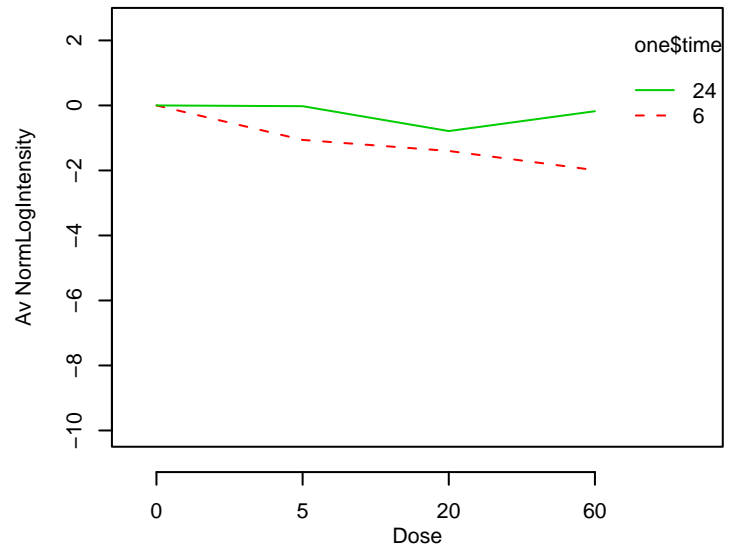

**GO\_0043122 : regulation of I-kappaB kinase/NF-kappaB cascade**      **GO\_0043123 : positive regulation of I-kappaB kinase/NF-kappaB cascade**

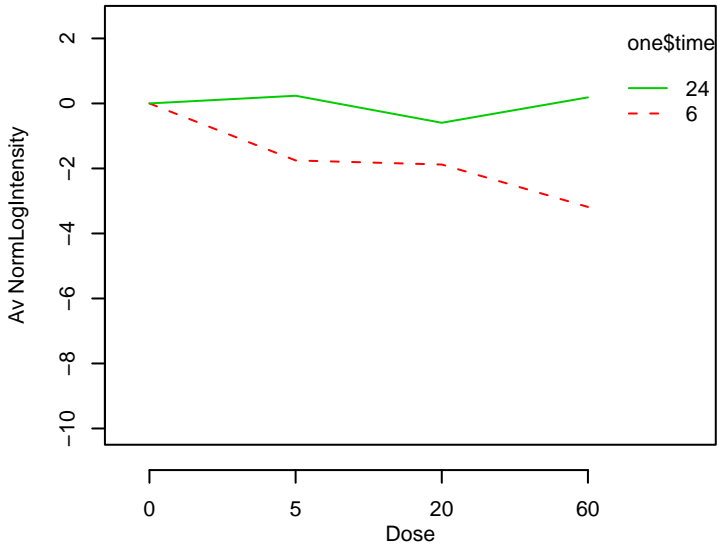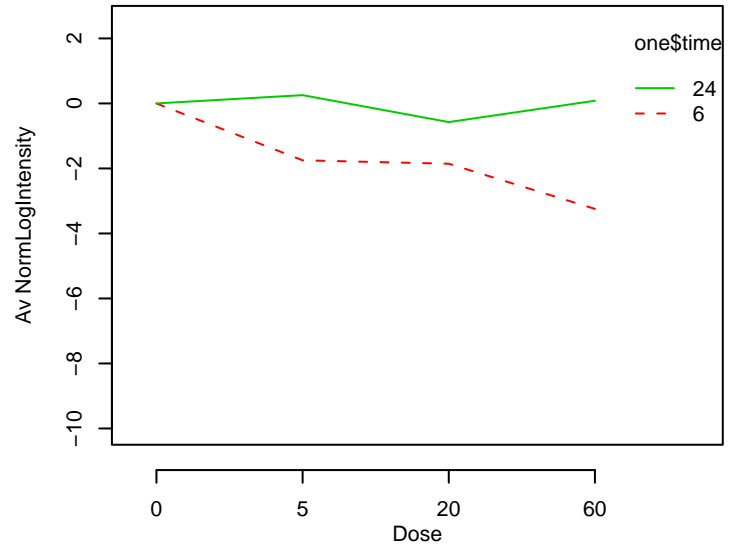

**GO\_0043124 : negative regulation of I-kappaB kinase/NF-kappaB cascade**

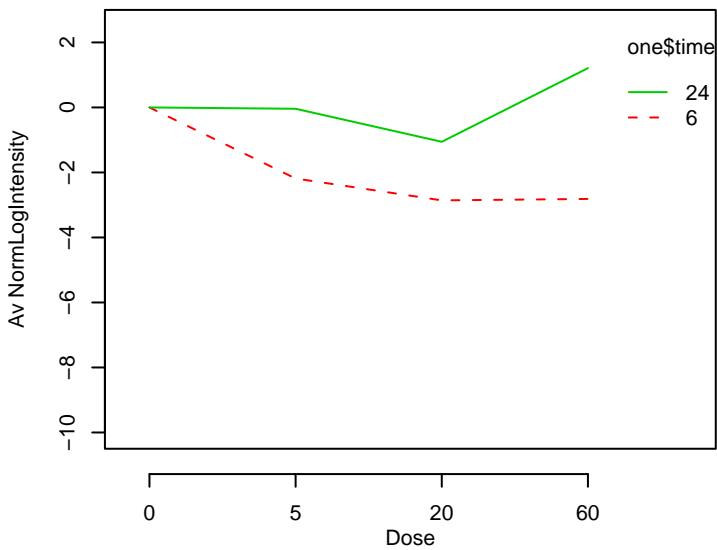

**GO\_0043149 : stress fiber formation**

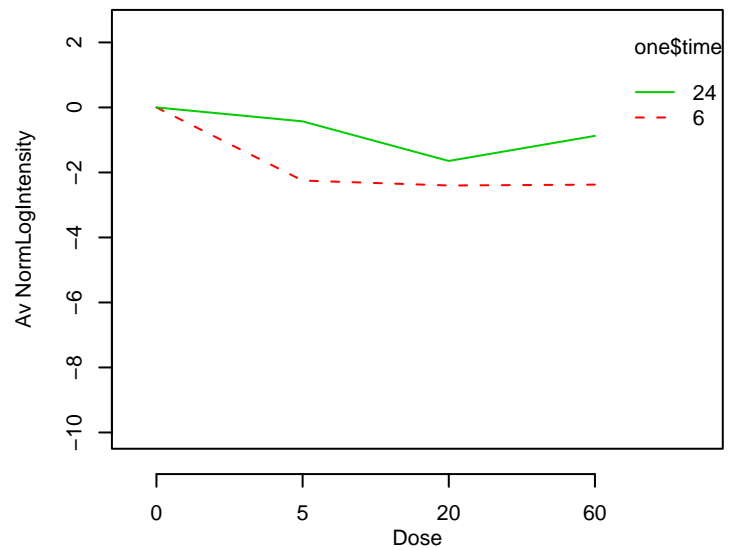



**GO\_0043154 : negative regulation of caspase activity**

**O\_0043161 : proteasomal ubiquitin-dependent protein catab**

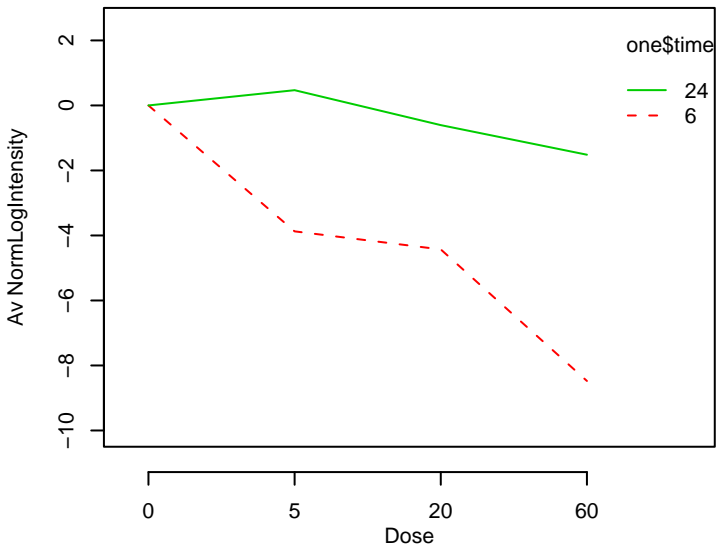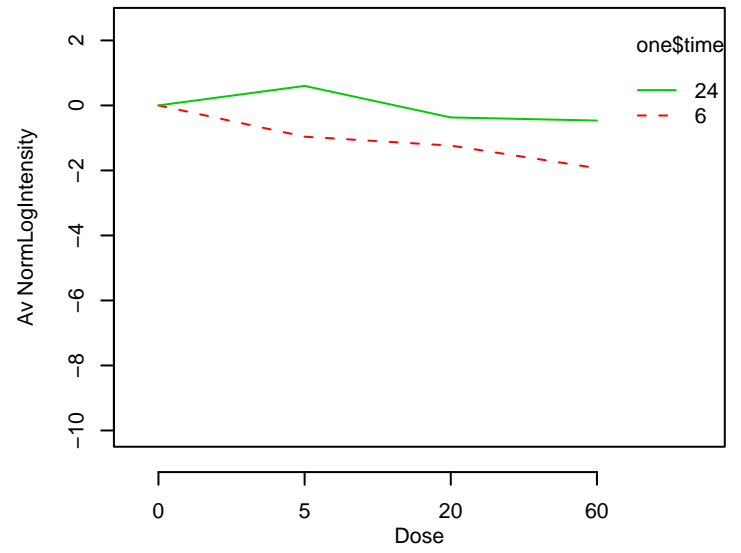

**GO\_0043193 : positive regulation of gene-specific transcrip**

**GO\_0043241 : protein complex disassembly**

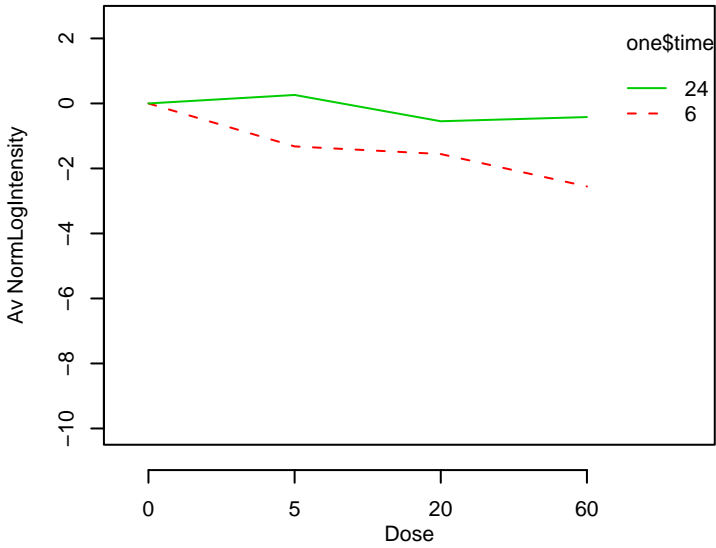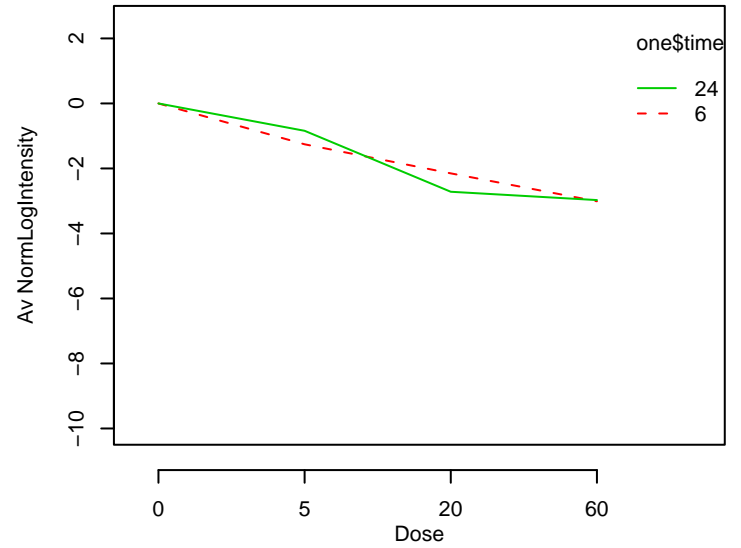

**GO\_0043254 : regulation of protein complex assembly**

**GO\_0043255 : regulation of carbohydrate biosynthesis**

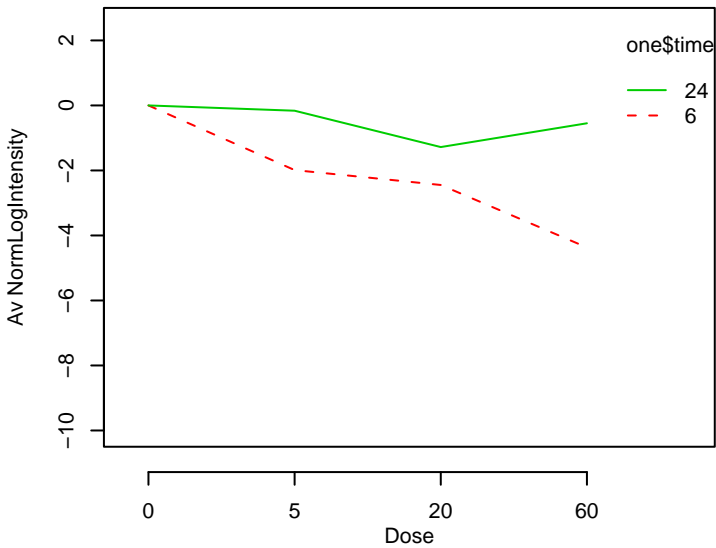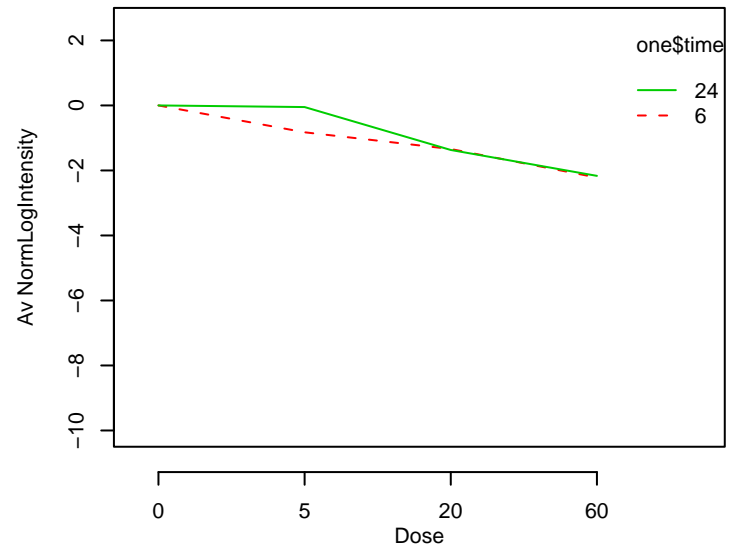

**GO\_0043269 : regulation of ion transport**

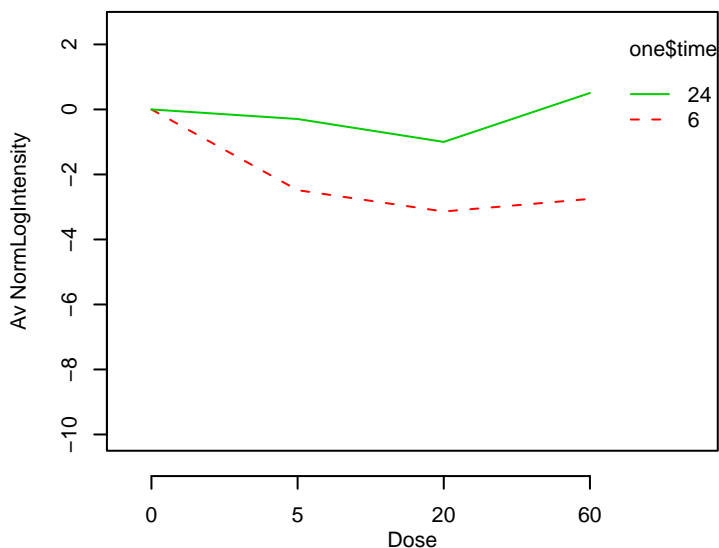

**GO\_0043280 : positive regulation of caspase activity**

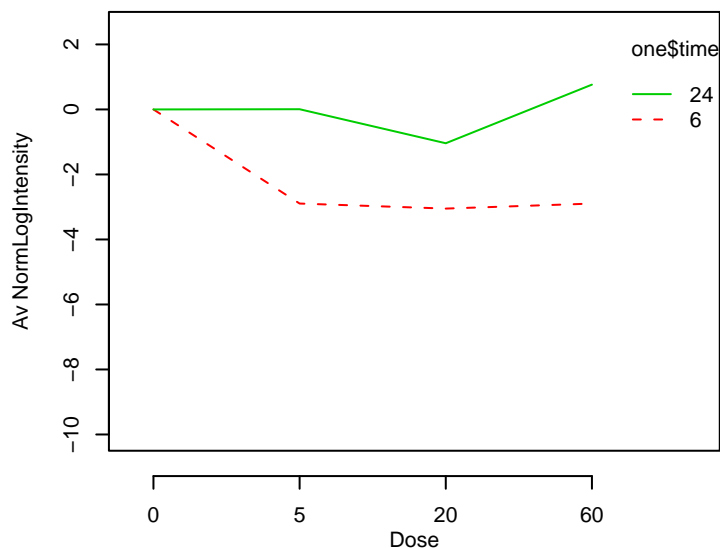

**GO\_0043281 : regulation of caspase activity**

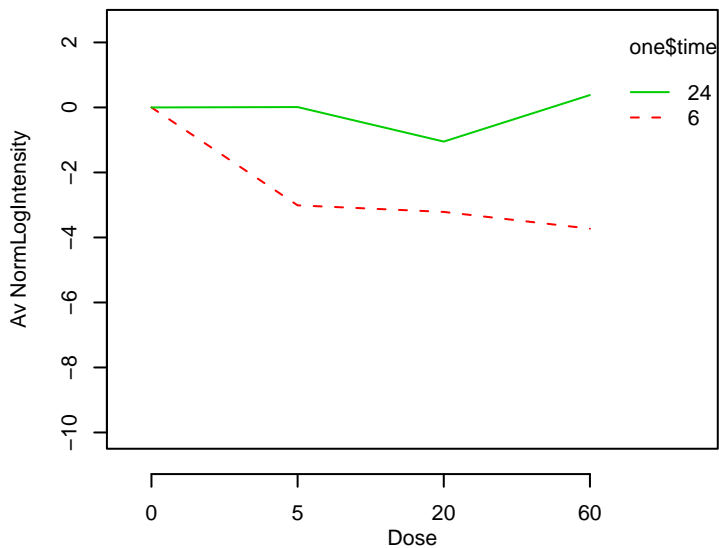

**GO\_0043284 : biopolymer biosynthesis**

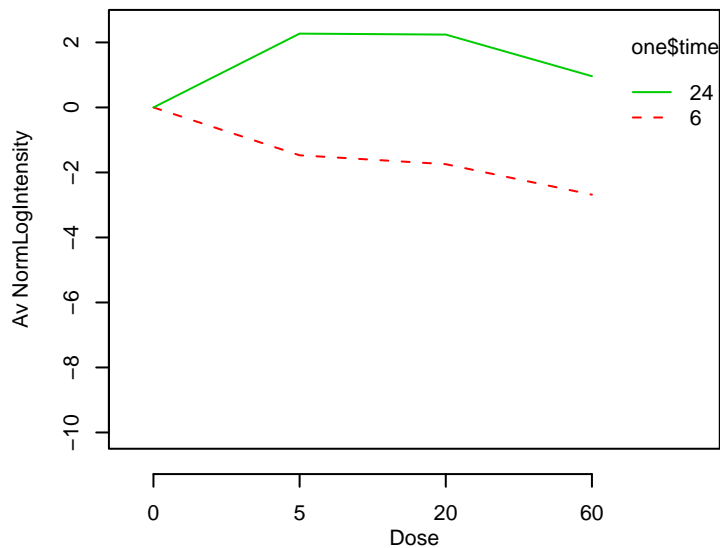

**GO\_0043299 : leukocyte degranulation**

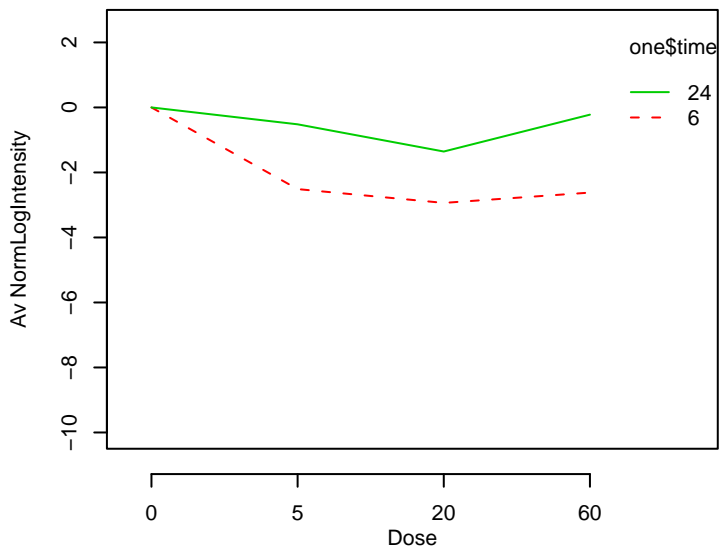

**GO\_0043303 : mast cell degranulation**

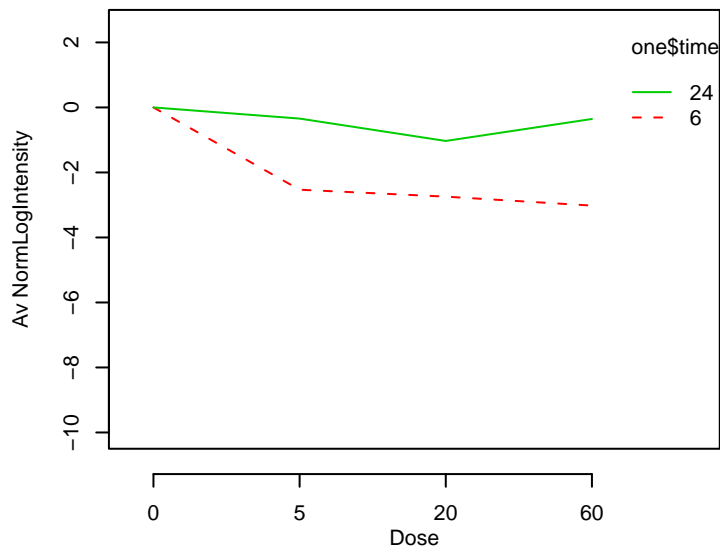

**GO\_0043393 : regulation of protein binding**

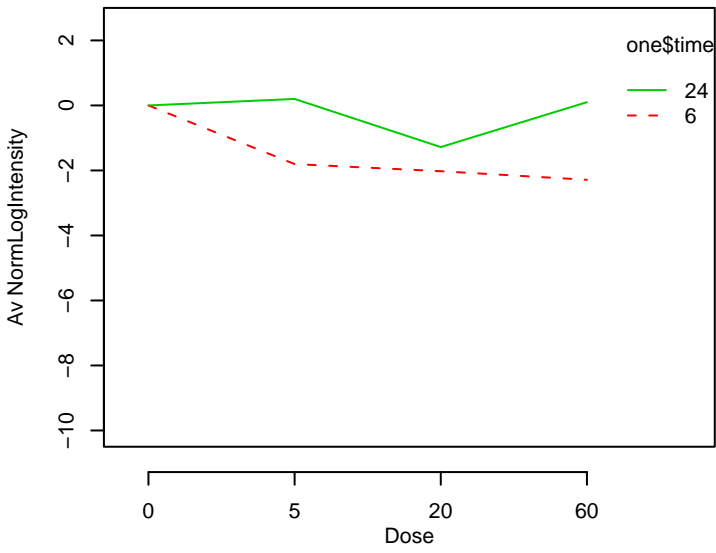

**GO\_0043405 : regulation of MAPK activity**

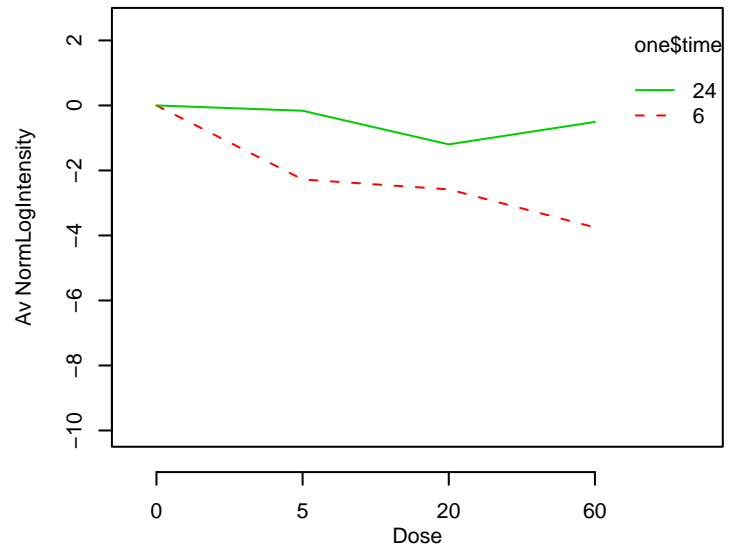

**GO\_0043406 : positive regulation of MAPK activity**

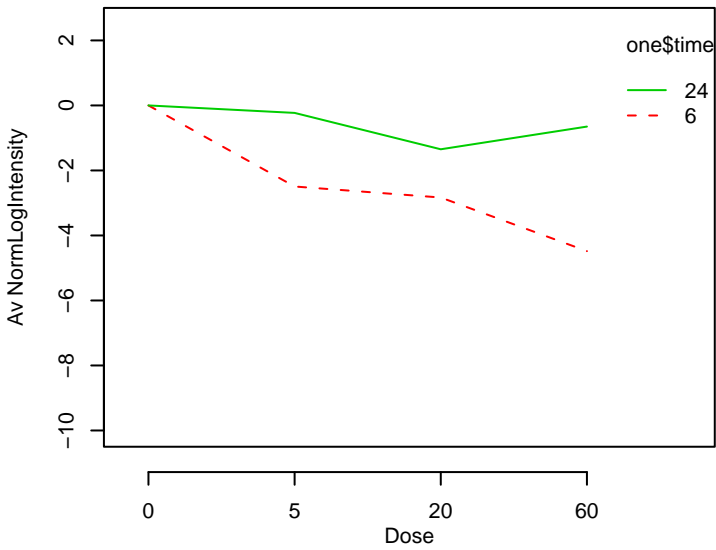

**GO\_0043407 : negative regulation of MAPK activity**

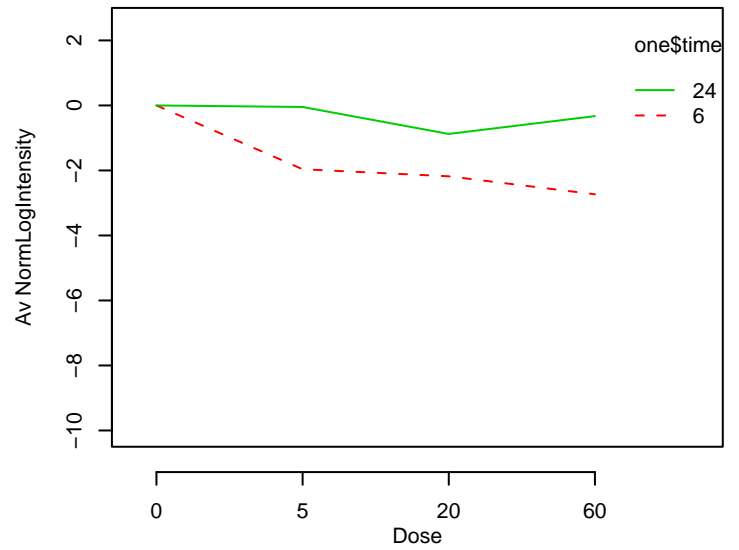

**GO\_0043408 : regulation of MAPKKK cascade**

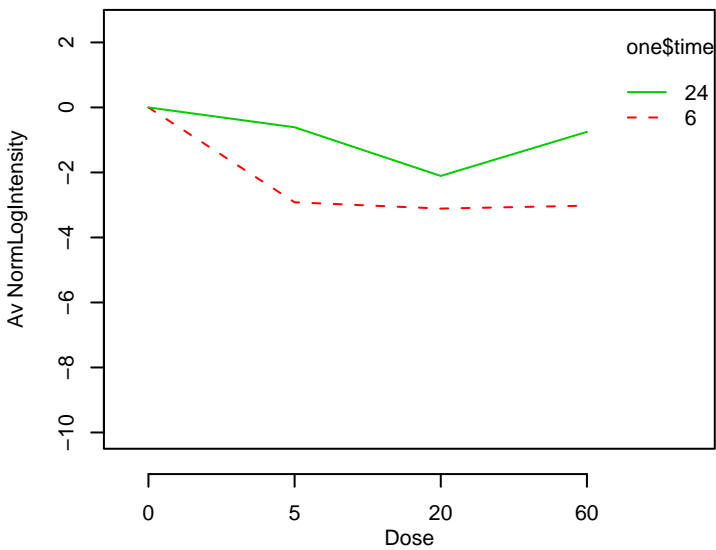

**GO\_0043410 : positive regulation of MAPKKK cascade**

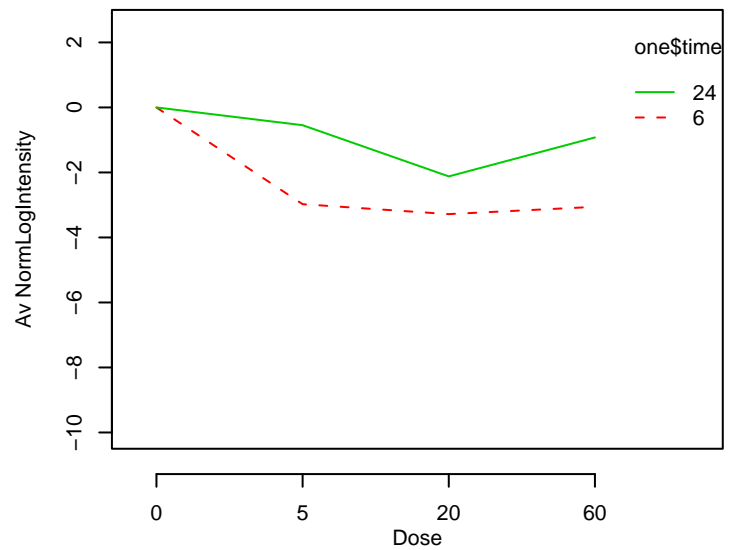

**GO\_0043413 : biopolymer glycosylation**

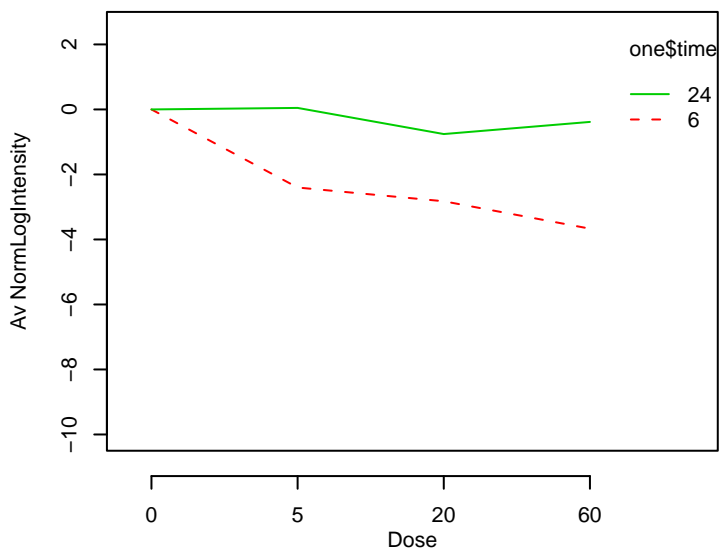

**GO\_0043414 : biopolymer methylation**

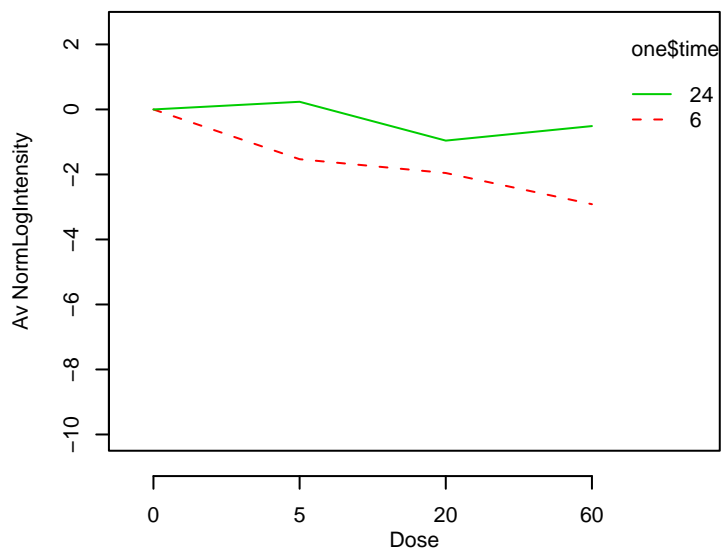

**GO\_0043433 : negative regulation of transcription factor ac**

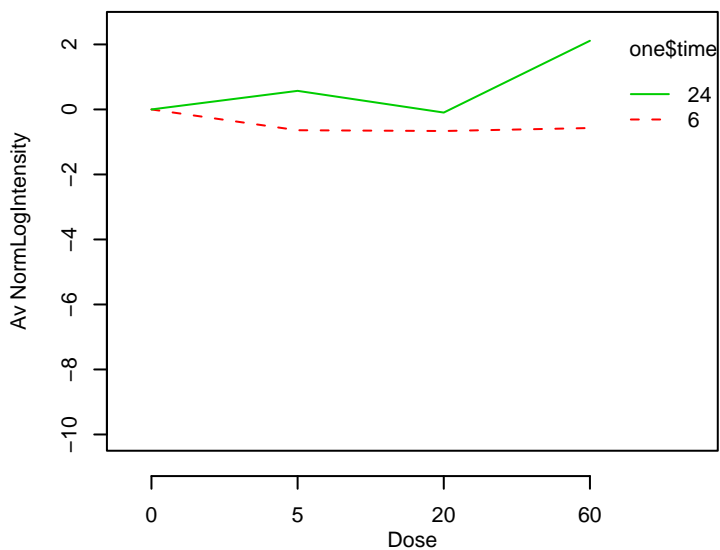

**GO\_0043434 : response to peptide hormone stimulus**

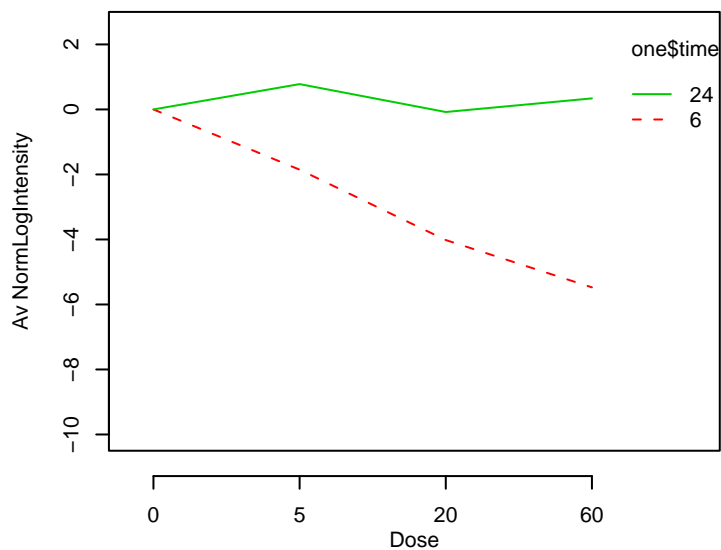

**GO\_0043449 : alkene metabolism**

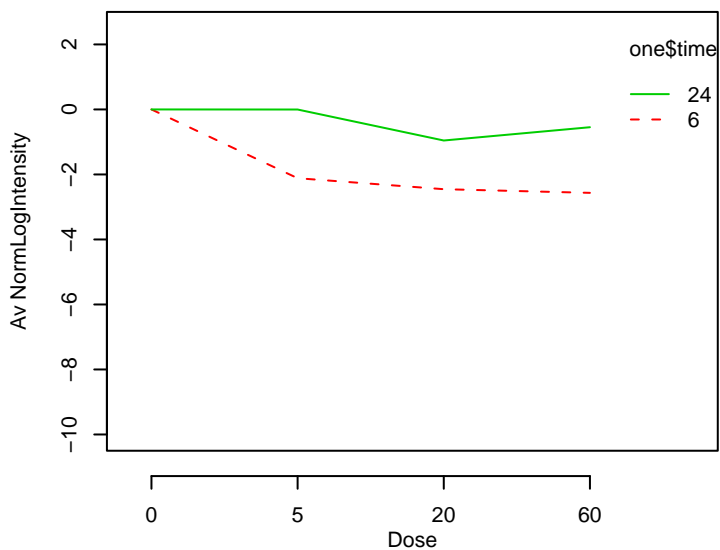

**GO\_0043450 : alkene biosynthesis**

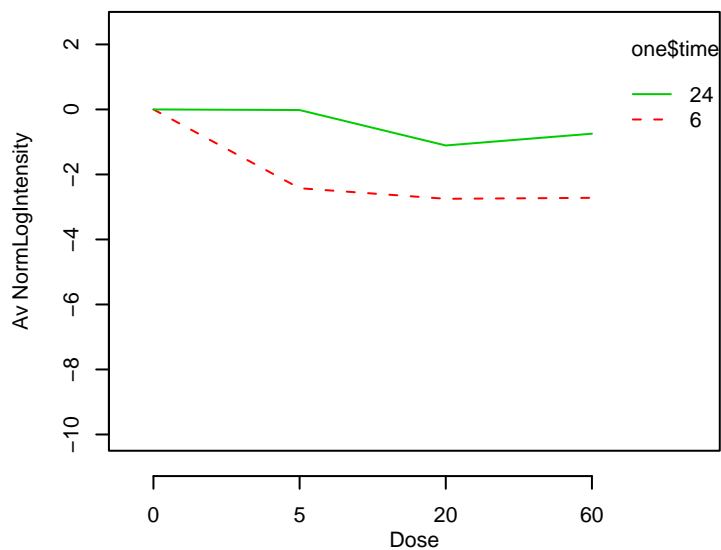

**GO\_0043473 : pigmentation**

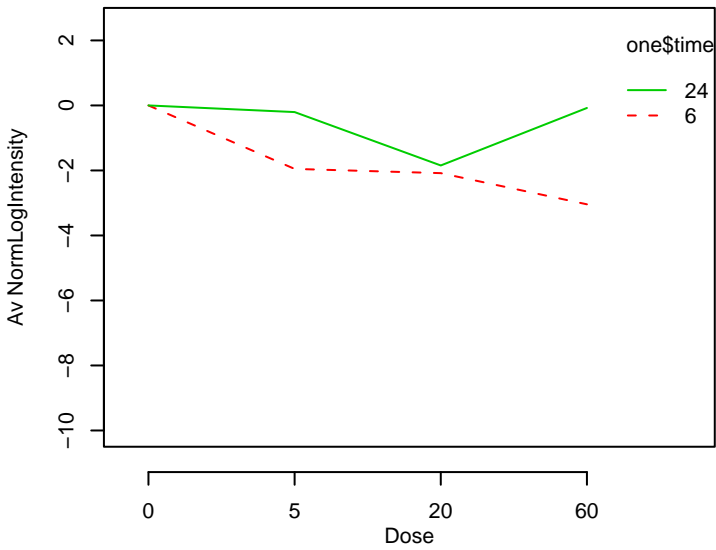

**GO\_0043487 : regulation of RNA stability**

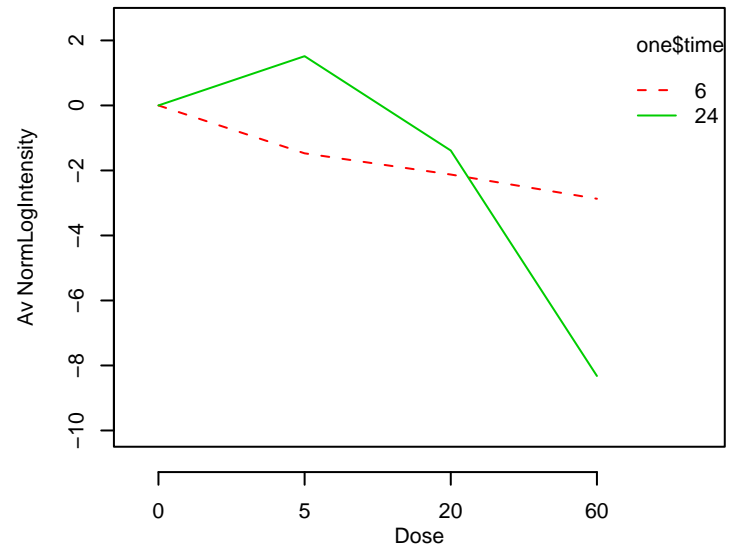

**GO\_0043488 : regulation of mRNA stability**

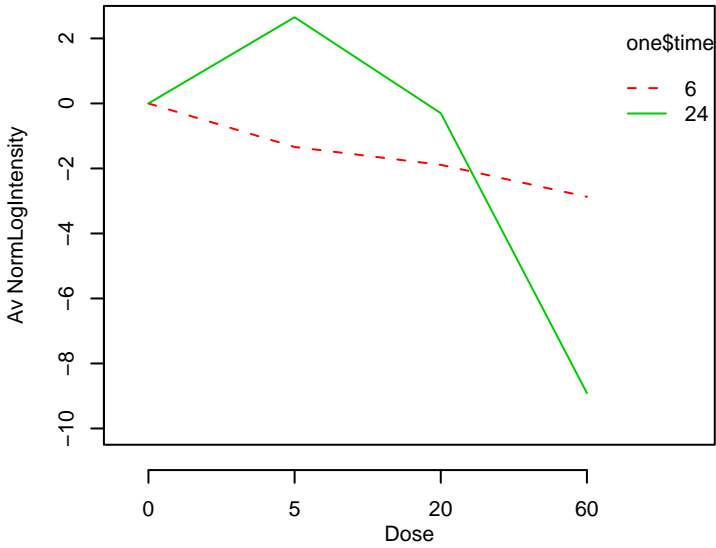

**GO\_0043506 : regulation of JNK activity**

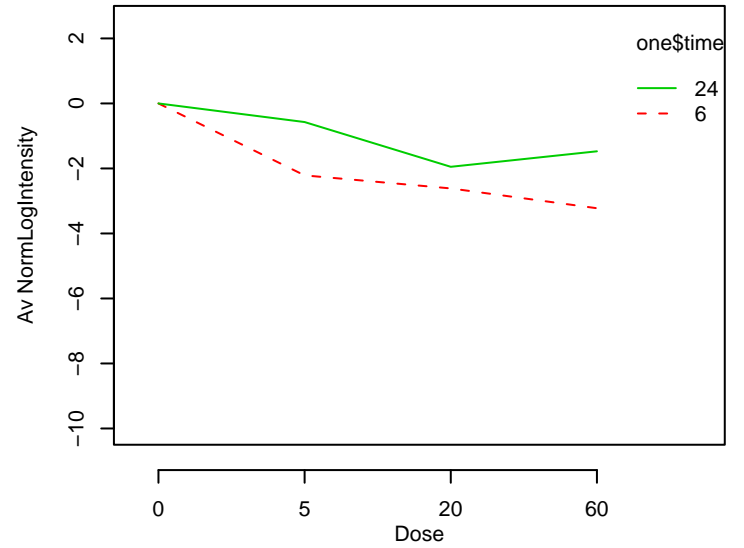

**GO\_0043507 : positive regulation of JNK activity**

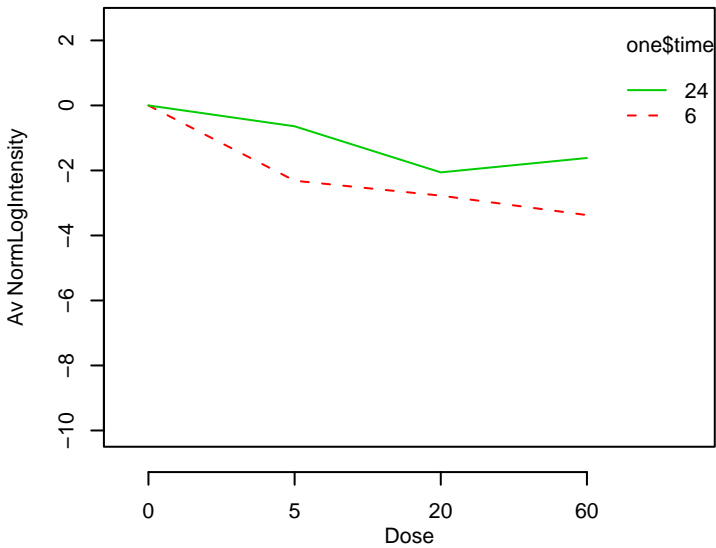

**GO\_0043523 : regulation of neuron apoptosis**

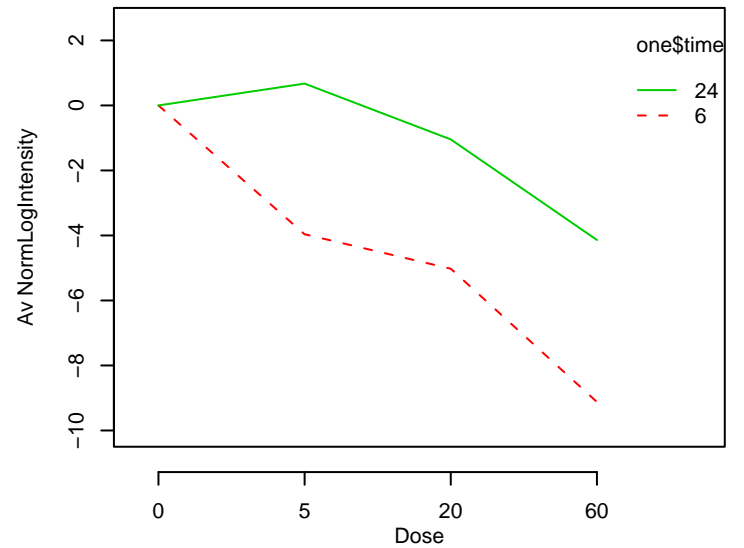

**GO\_0043524 : negative regulation of neuron apoptosis**

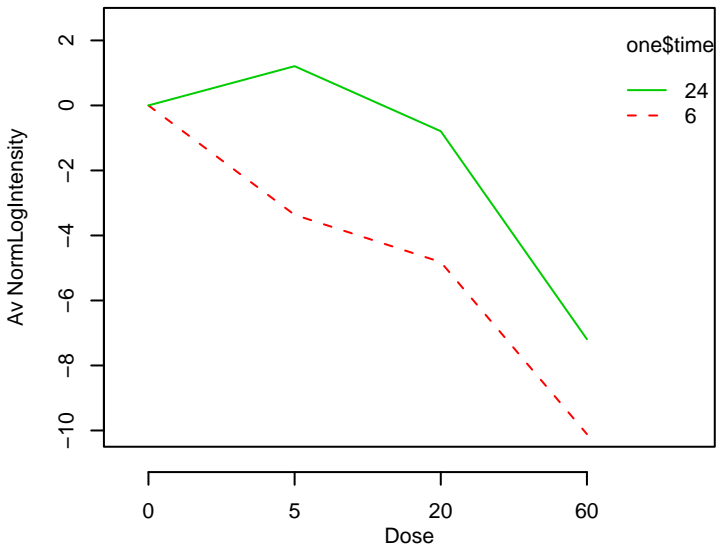

**GO\_0043542 : endothelial cell migration**

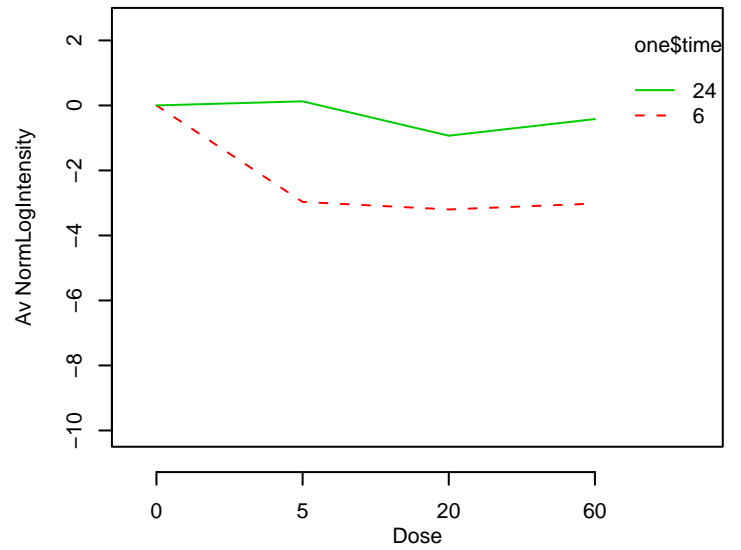

**GO\_0043543 : protein amino acid acylation**

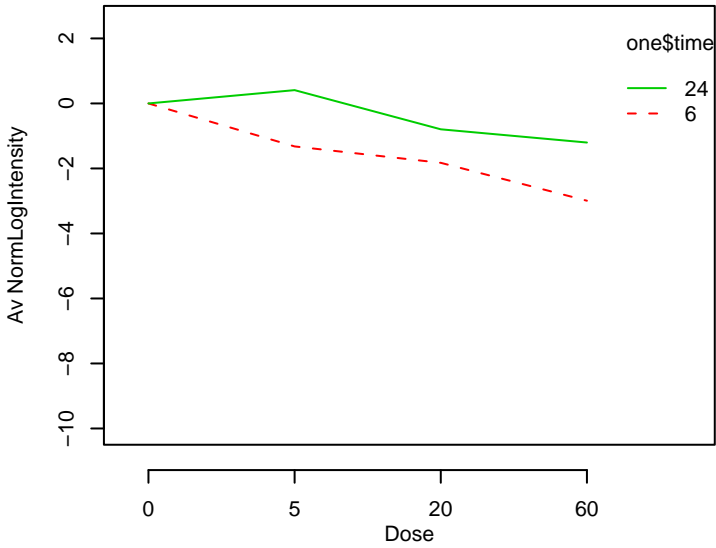

**GO\_0043545 : molybdopterin cofactor metabolism**

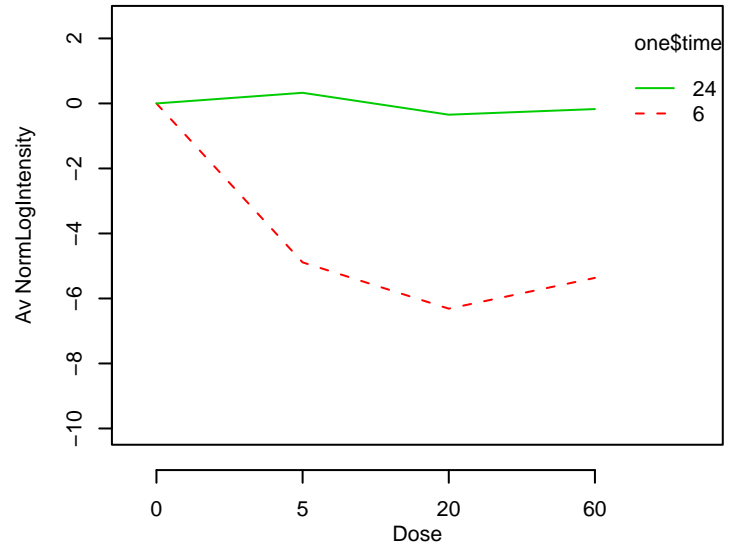

**GO\_0043549 : regulation of kinase activity**

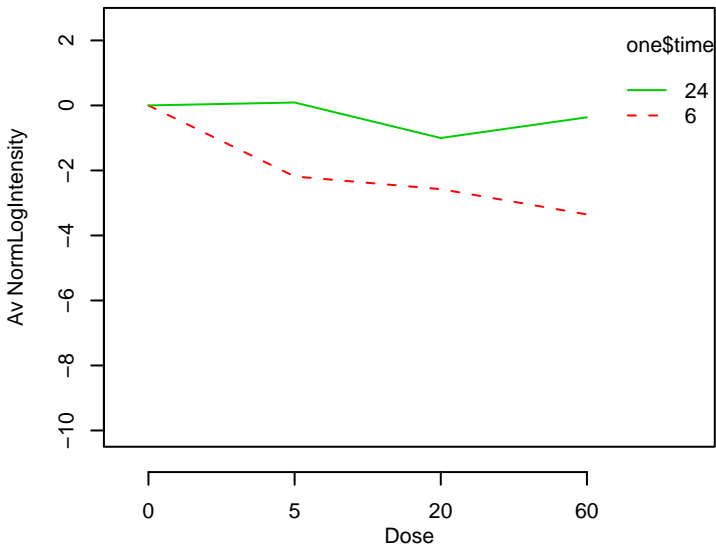

**GO\_0043550 : regulation of lipid kinase activity**

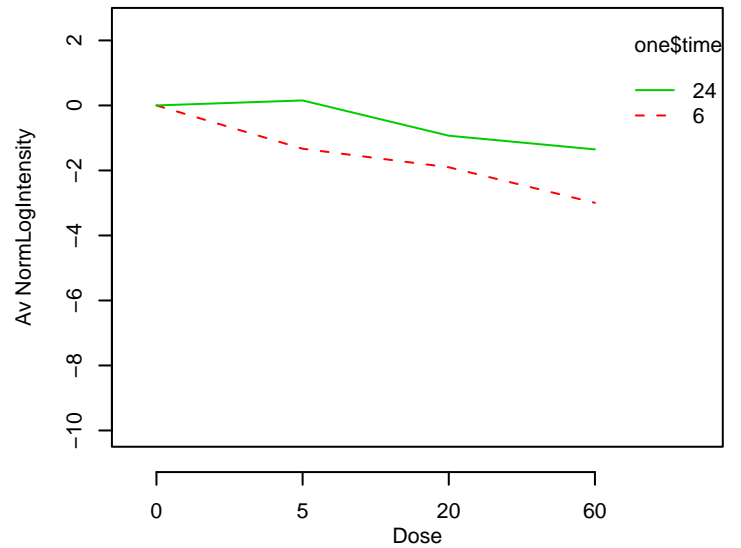

**GO\_0043583 : ear development**

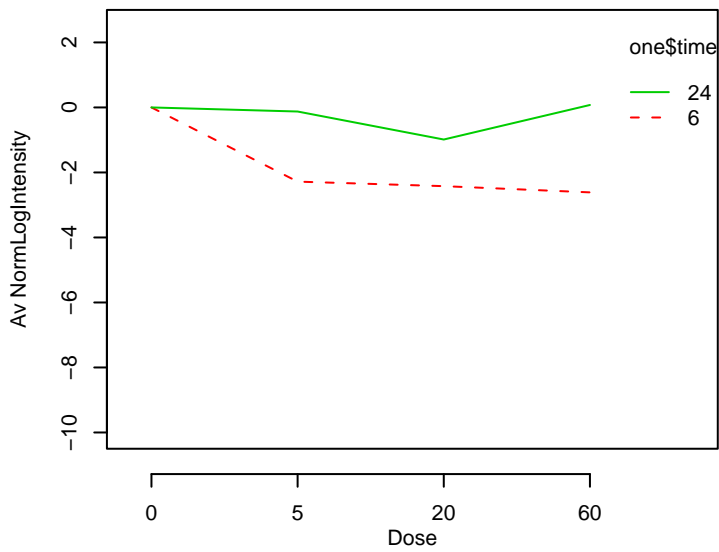

**GO\_0043588 : skin development**

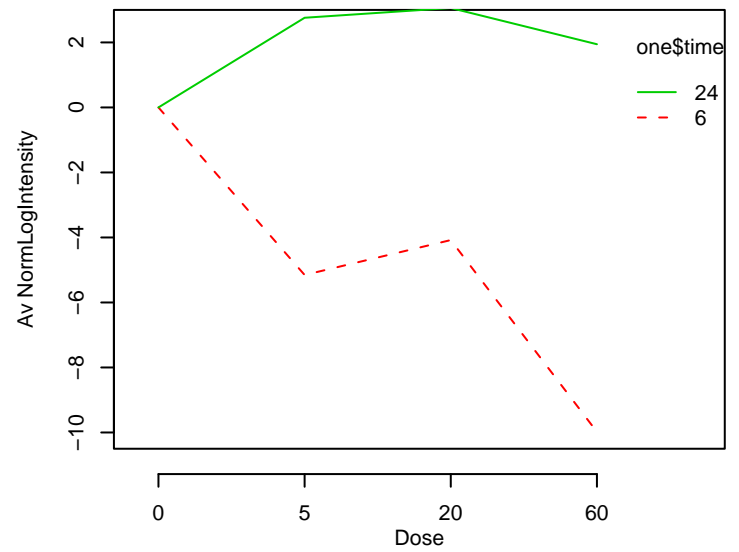

**GO\_0043631 : RNA polyadenylation**

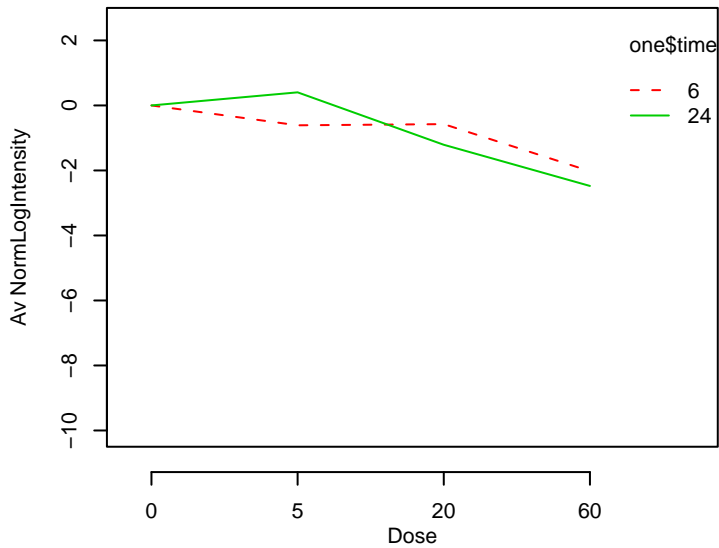

**GO\_0043632 : modification-dependent macromolecule catabolism**

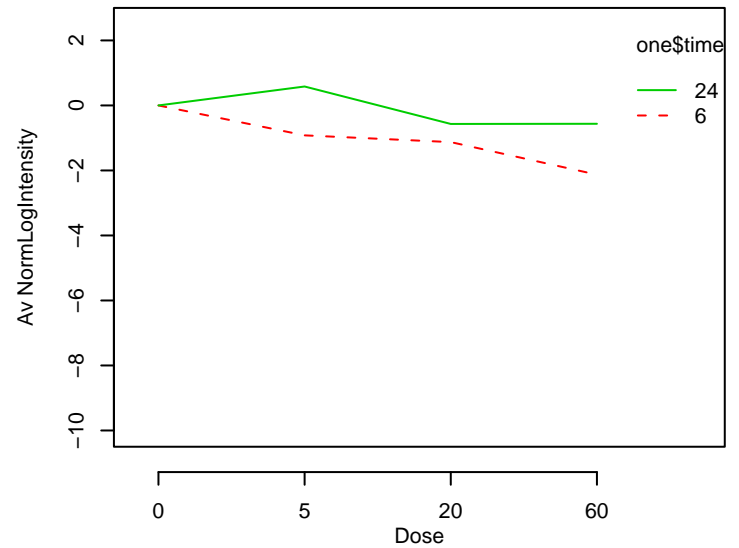

**GO\_0043648 : dicarboxylic acid metabolism**

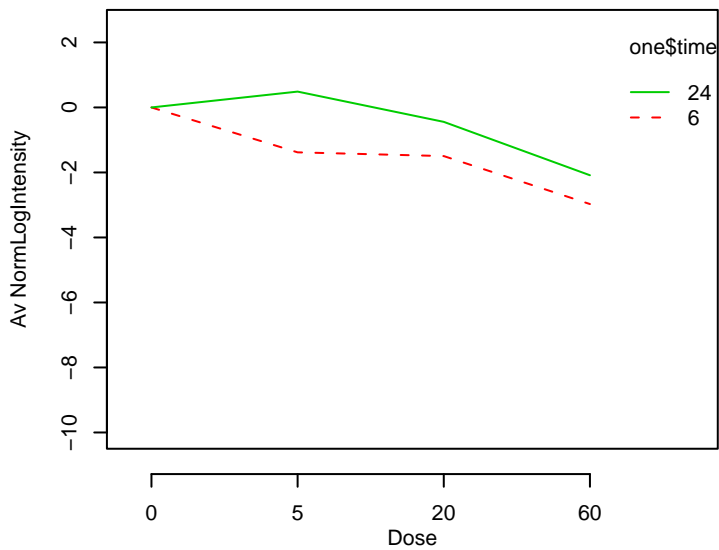

**GO\_0044241 : lipid digestion**

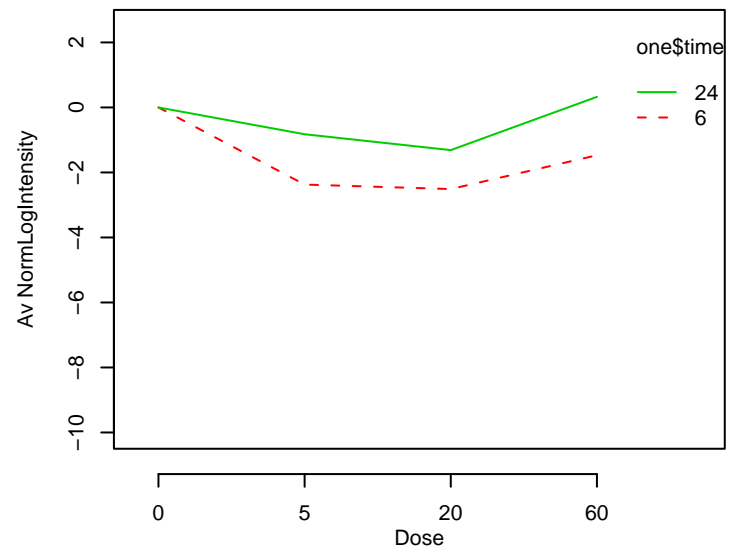

**GO\_0044242 : cellular lipid catabolism**

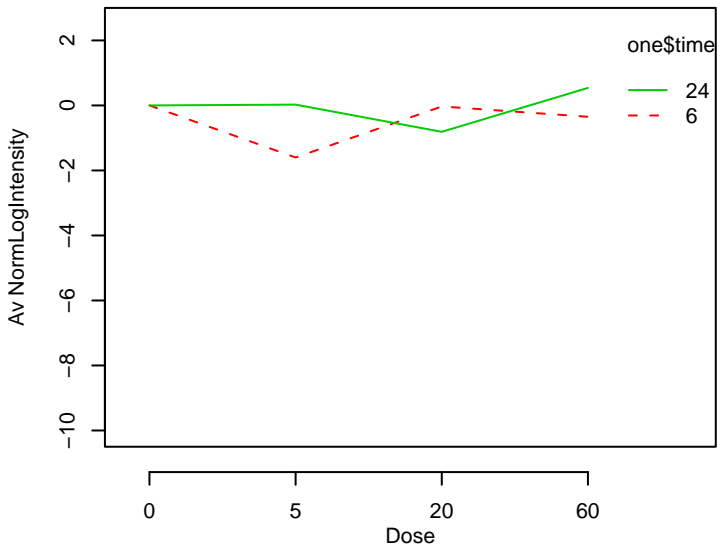

**GO\_0044247 : cellular polysaccharide catabolism**

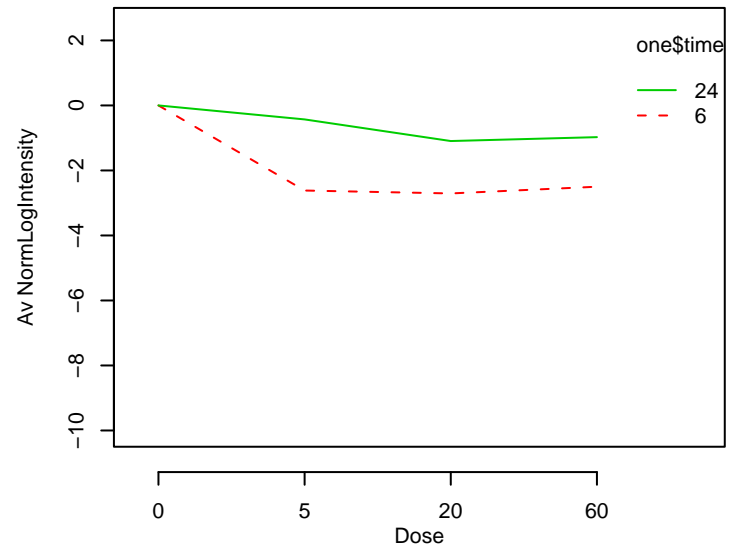

**GO\_0044257 : cellular protein catabolism**

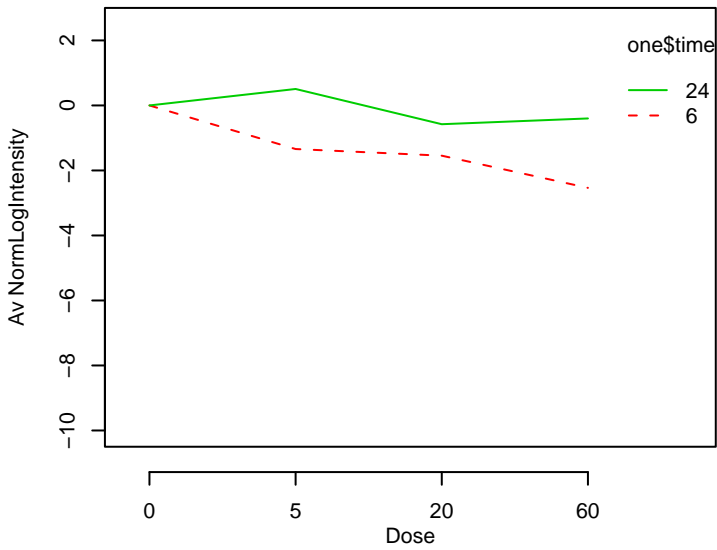

**GO\_0044264 : cellular polysaccharide metabolism**

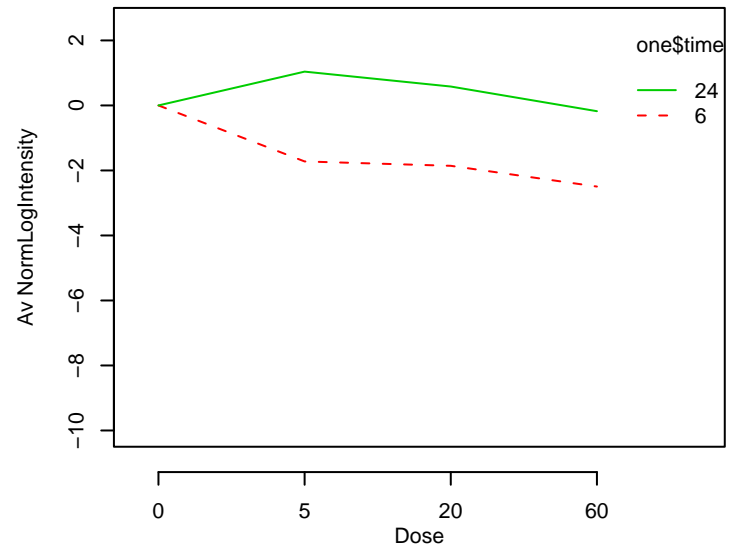

**GO\_0044270 : nitrogen compound catabolism**

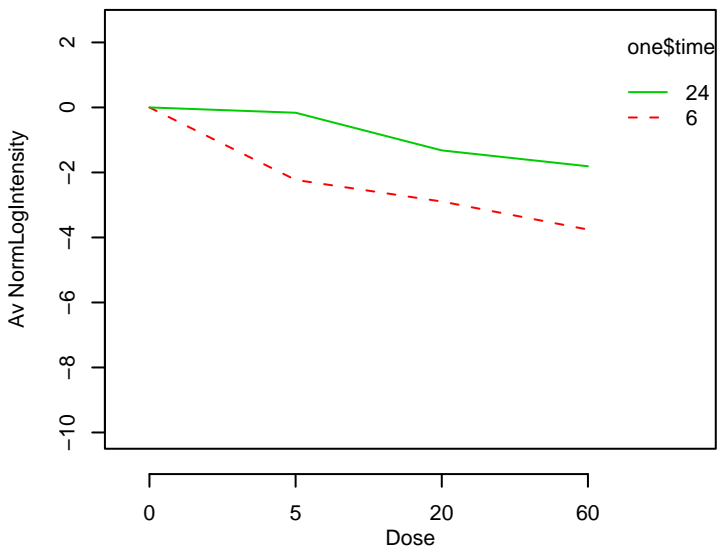

**GO\_0044271 : nitrogen compound biosynthesis**

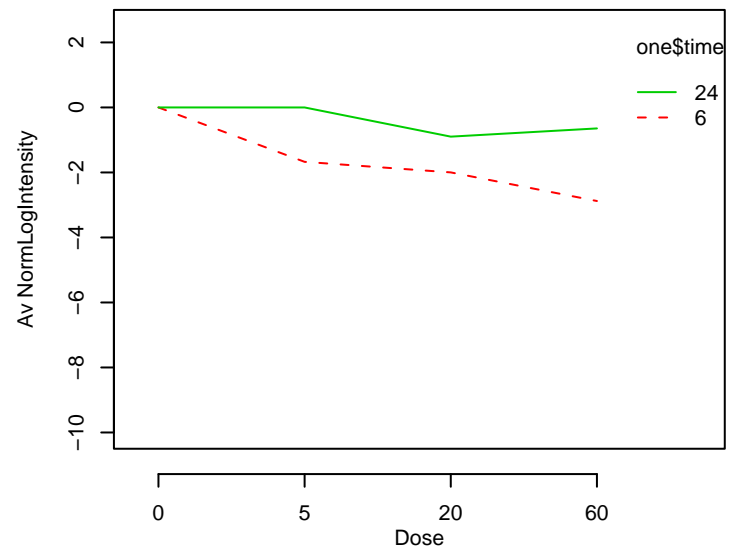



**GO\_0044272 : sulfur compound biosynthesis**

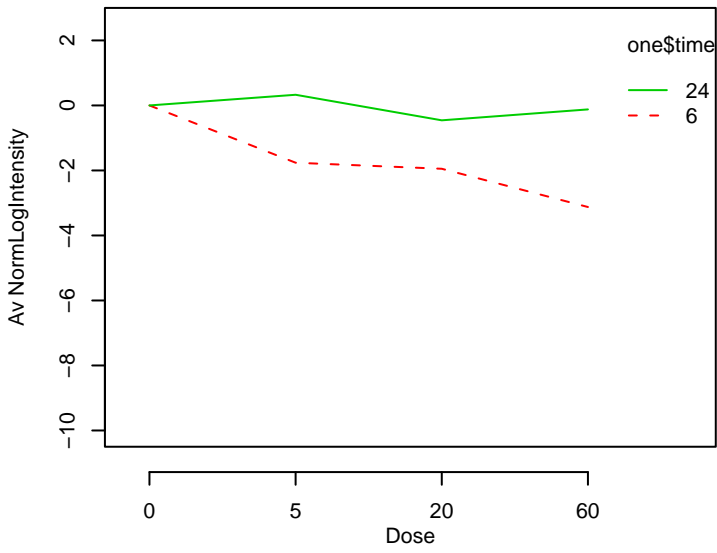

**GO\_0044275 : cellular carbohydrate catabolism**

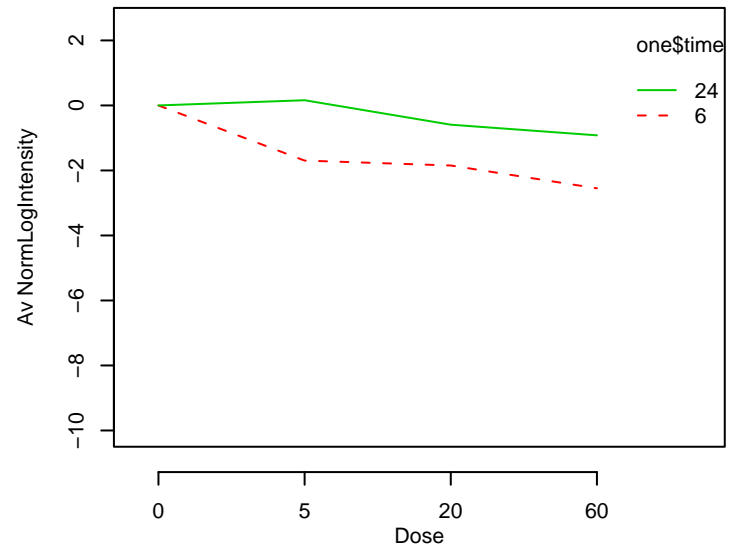

**O\_0044403 : symbiosis\, encompassing mutualism through p**

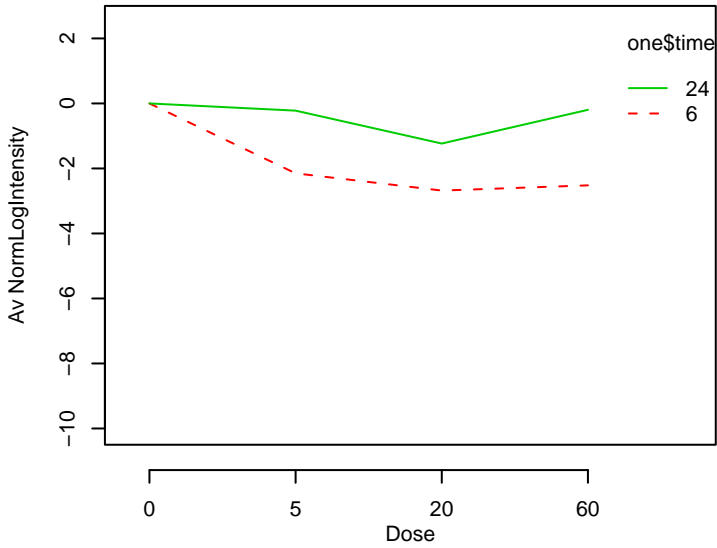

**GO\_0044409 : entry into host**

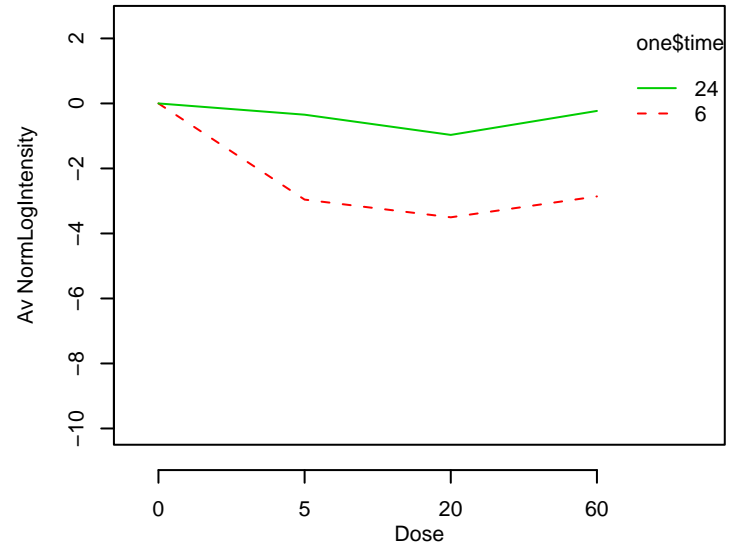

**GO\_0044419 : interspecies interaction between organismO\_0045005 : maintenance of fidelity during DNA-dependent**

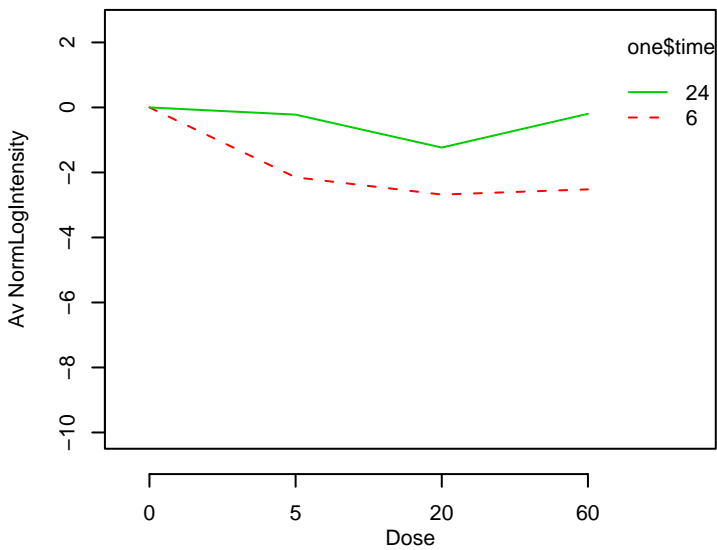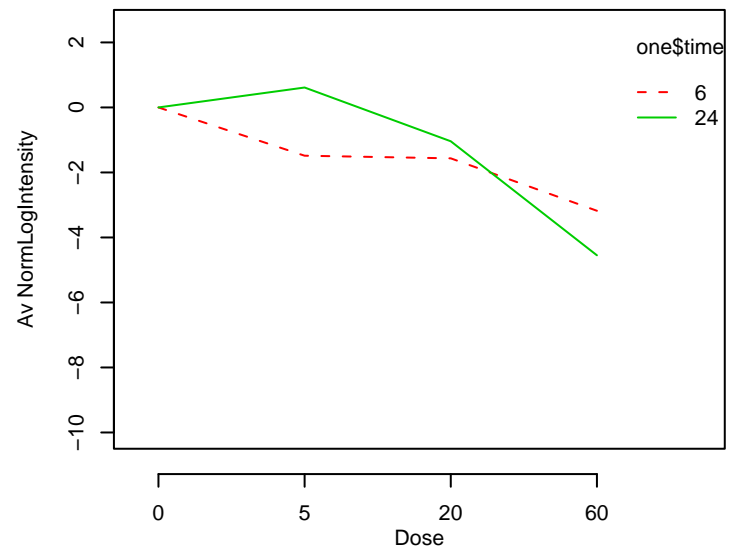

**GO\_0045017 : glycerolipid biosynthesis**

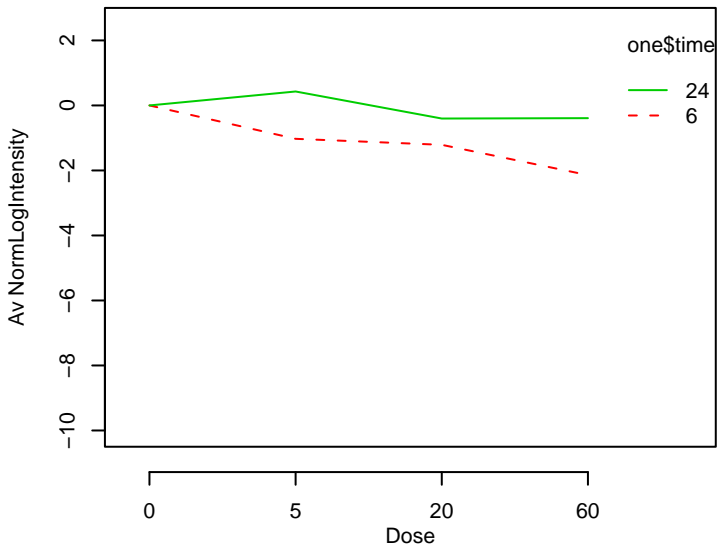

**GO\_0045026 : plasma membrane fusion**

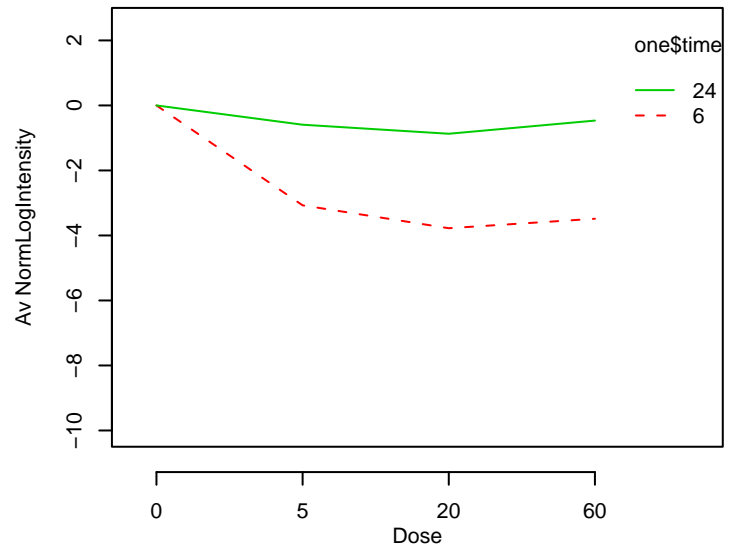

**GO\_0045039 : protein import into mitochondrial inner membi**

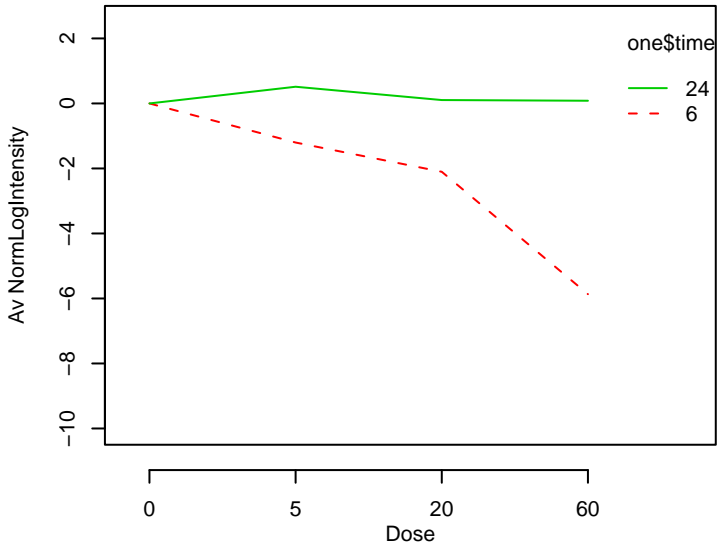

**GO\_0045045 : secretory pathway**

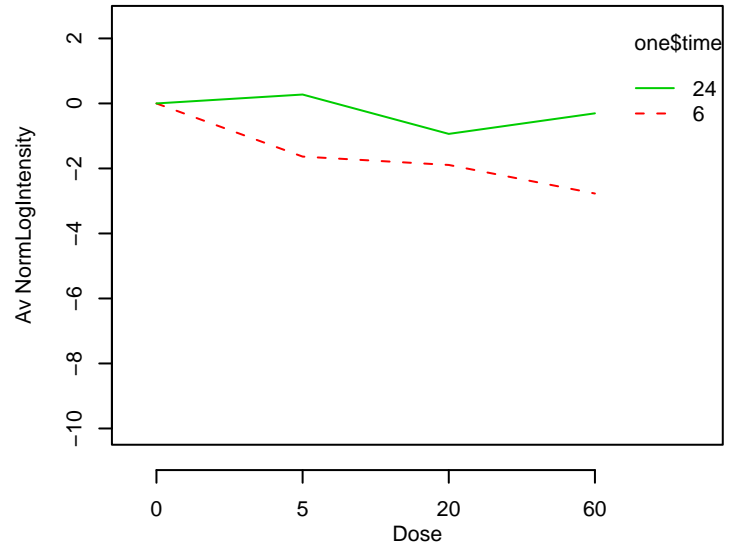

**GO\_0045047 : protein targeting to ER**

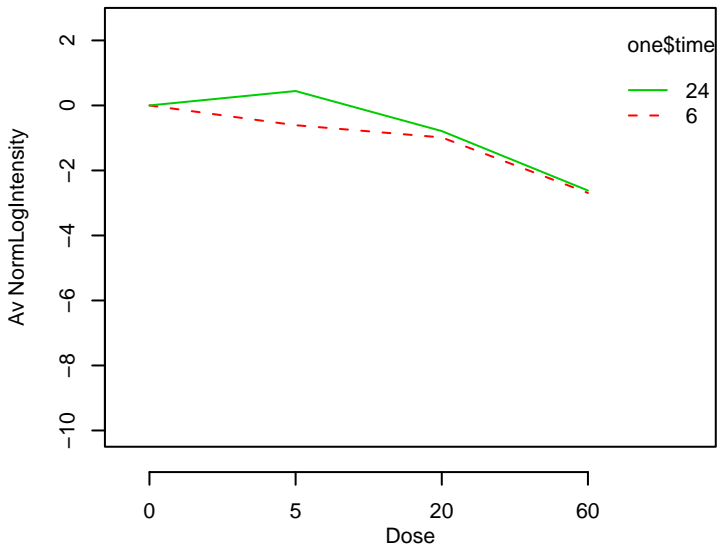

**GO\_0045055 : regulated secretory pathway**

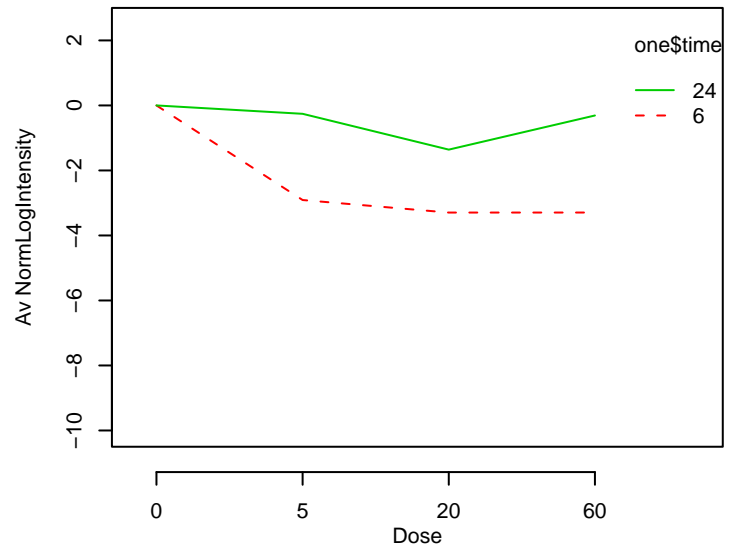

**GO\_0045058 : T cell selection**

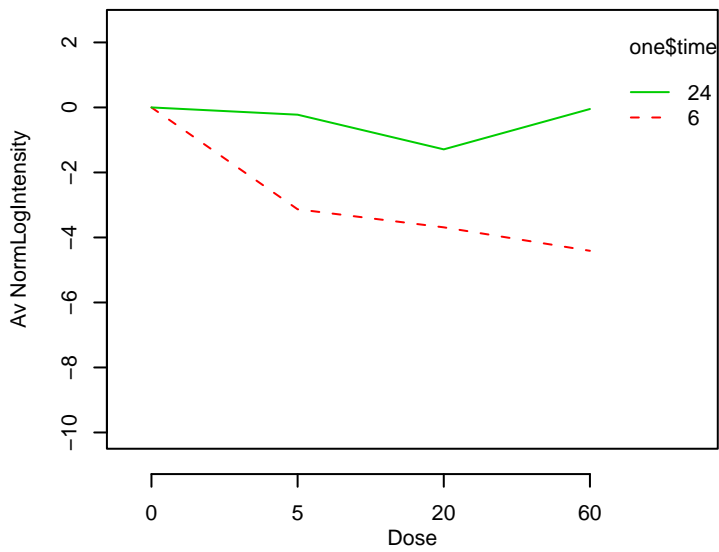

**GO\_0045059 : positive thymic T cell selection**

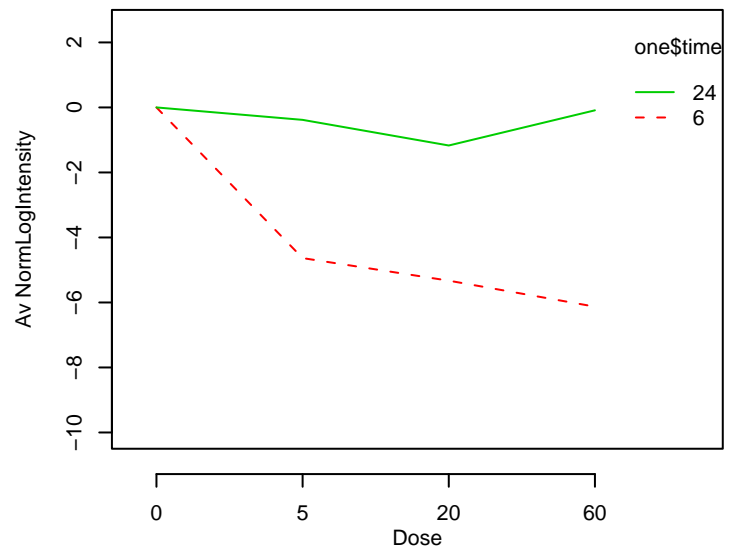

**GO\_0045060 : negative thymic T cell selection**

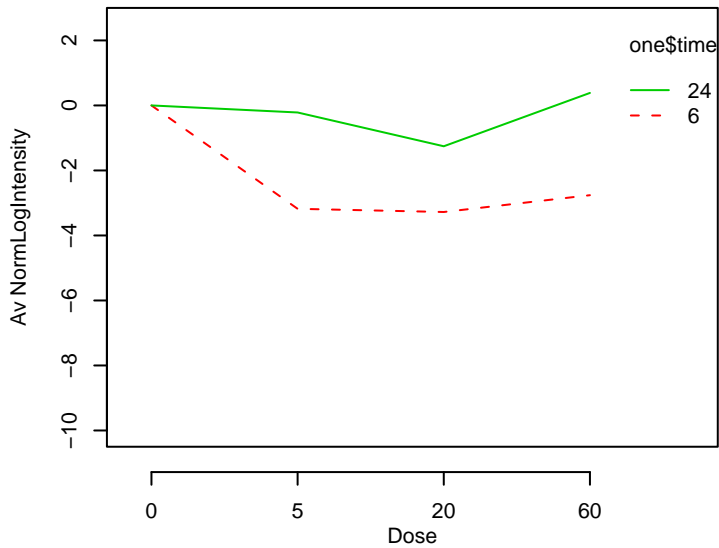

**GO\_0045061 : thymic T cell selection**

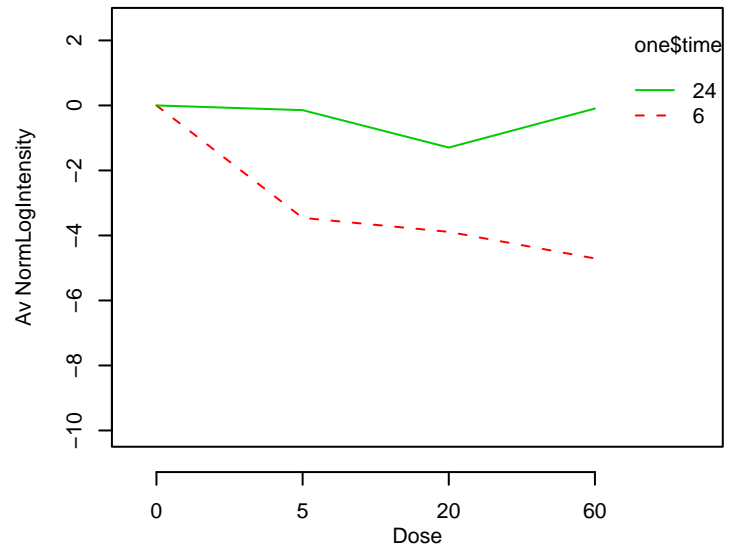

**GO\_0045069 : regulation of viral genome replication**

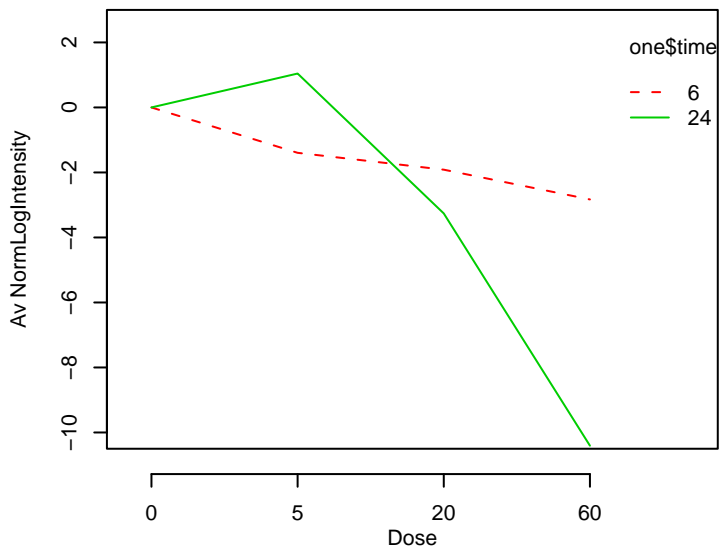

**GO\_0045072 : regulation of interferon-gamma biosynthesis**

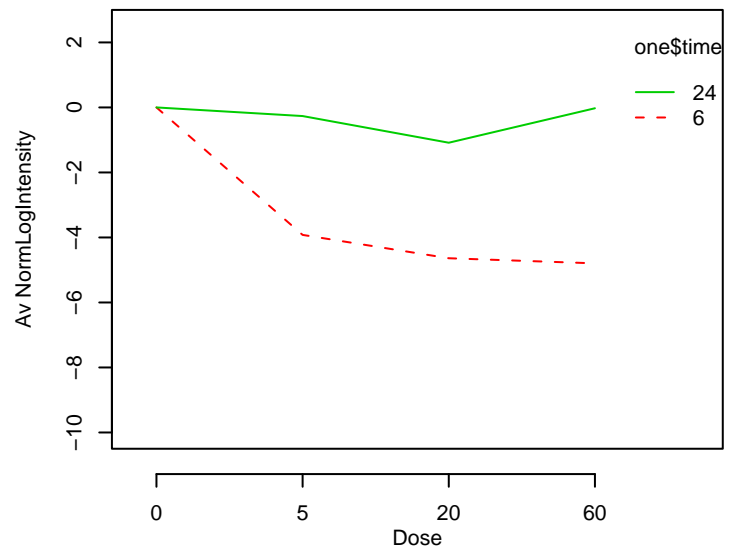

**GO\_0045073 : regulation of chemokine biosynthesis**

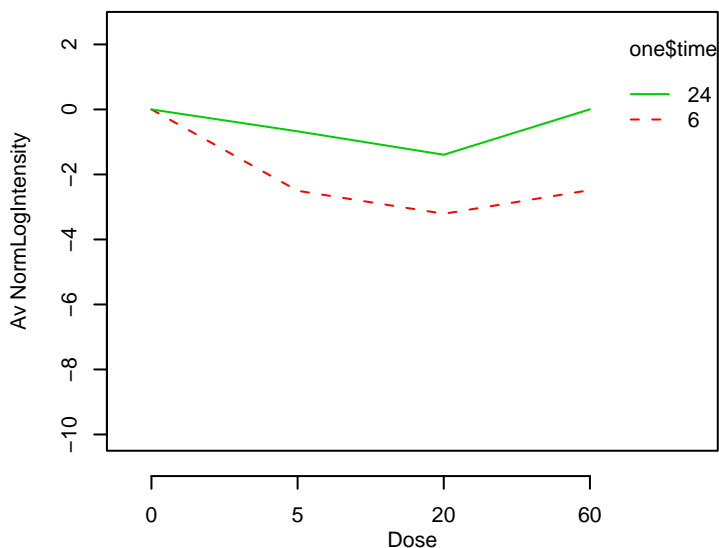

**GO\_0045075 : regulation of interleukin-12 biosynthesis**

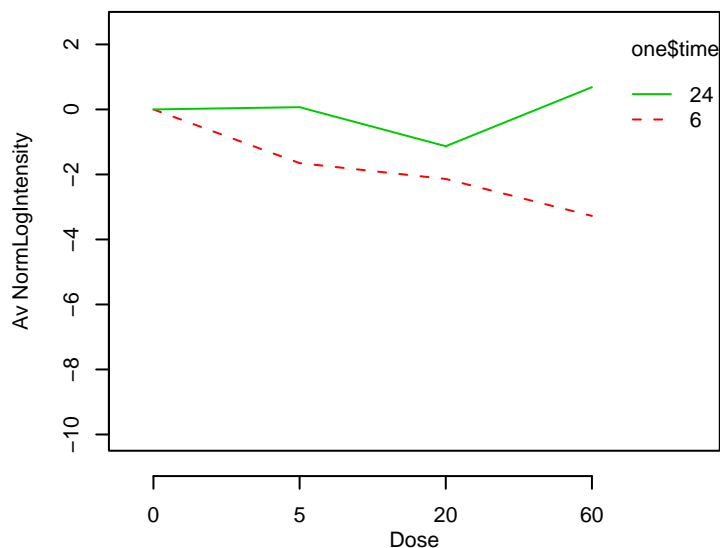

**GO\_0045076 : regulation of interleukin-2 biosynthesis** **GO\_0045078 : positive regulation of interferon-gamma biosynthesis**

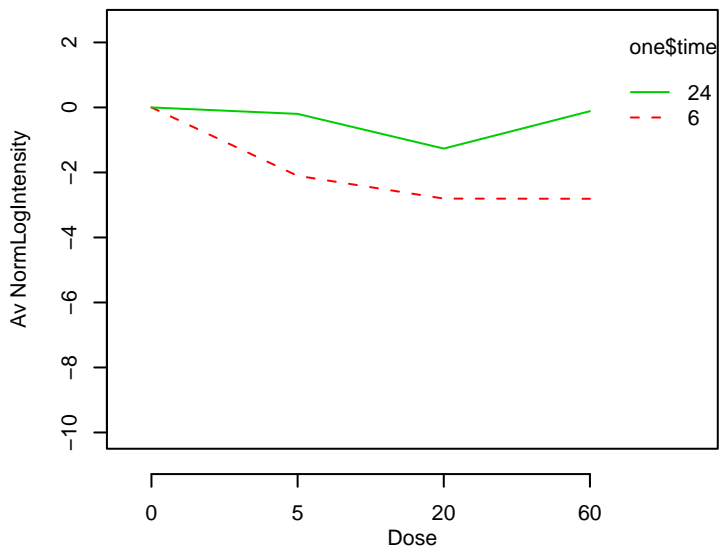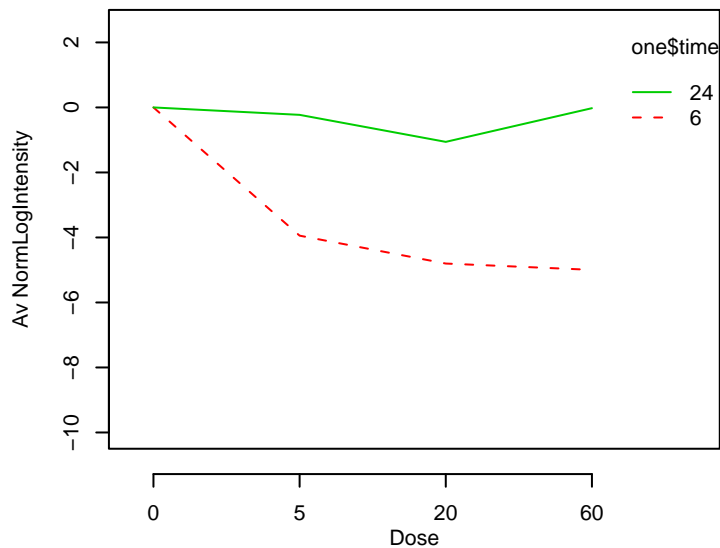

**GO\_0045084 : positive regulation of interleukin-12 biosynthesis** **GO\_0045086 : positive regulation of interleukin-2 biosynthesis**

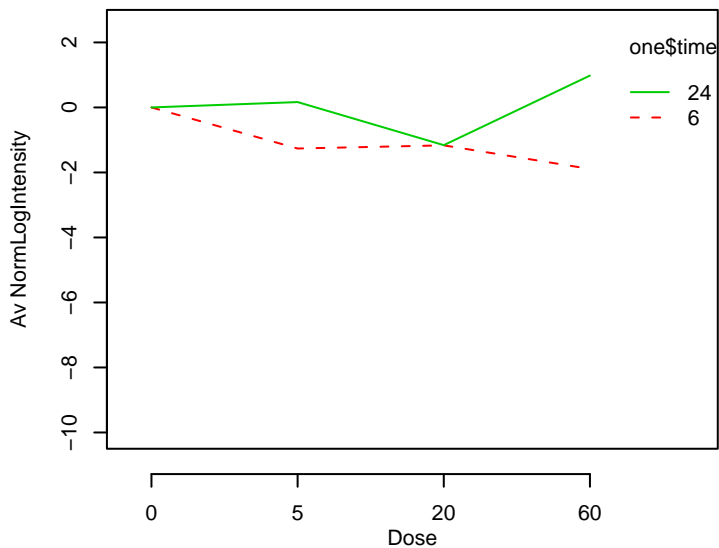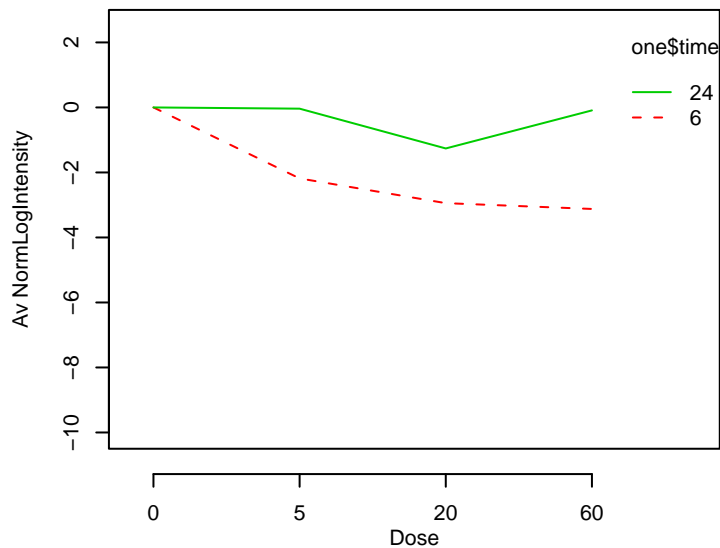

**GO\_0045087 : innate immune response**

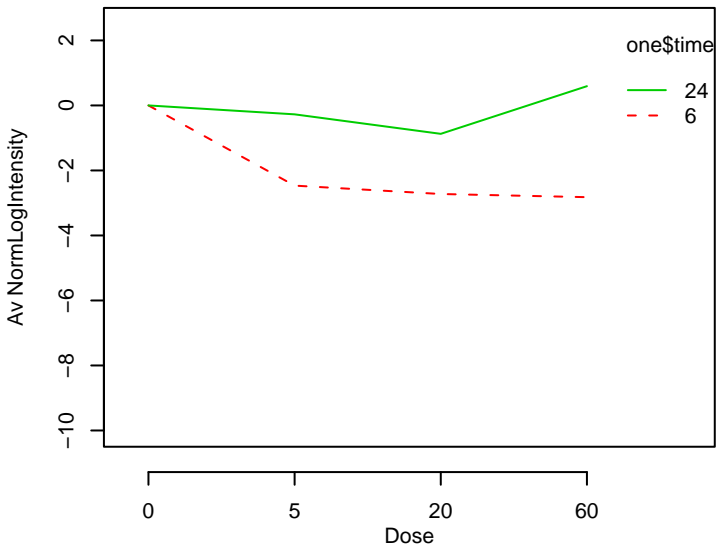

**GO\_0045088 : regulation of innate immune response**

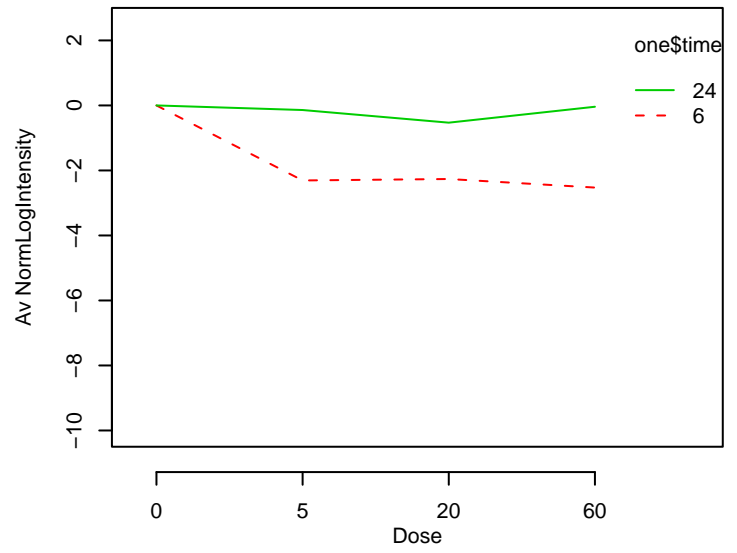

**GO\_0045089 : positive regulation of innate immune respon**

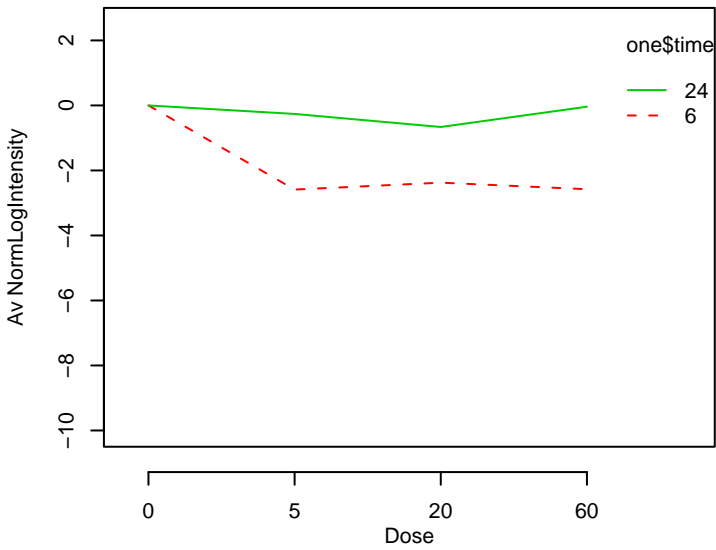

**GO\_0045103 : intermediate filament-based process**

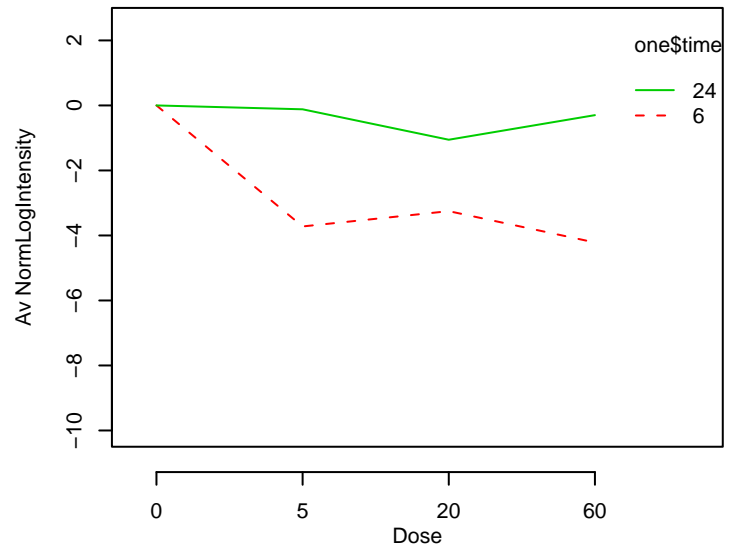

**GO\_0045104 : intermediate filament cytoskeleton organizatio** **GO\_0045137 : development of primary sexual characteristi**

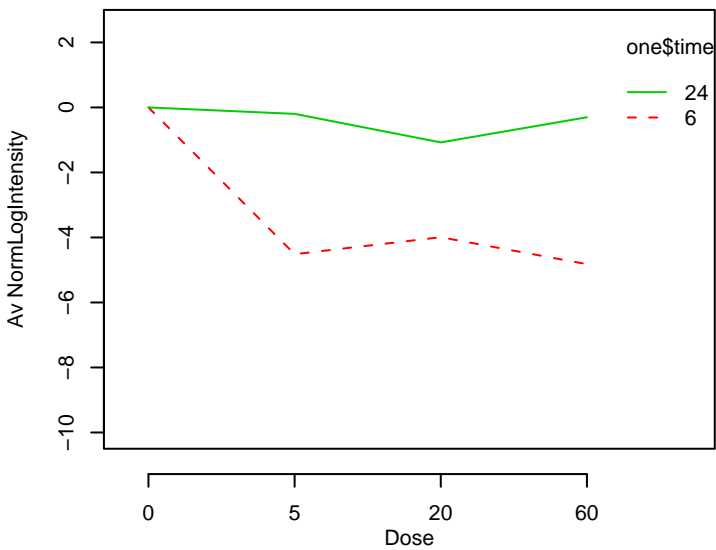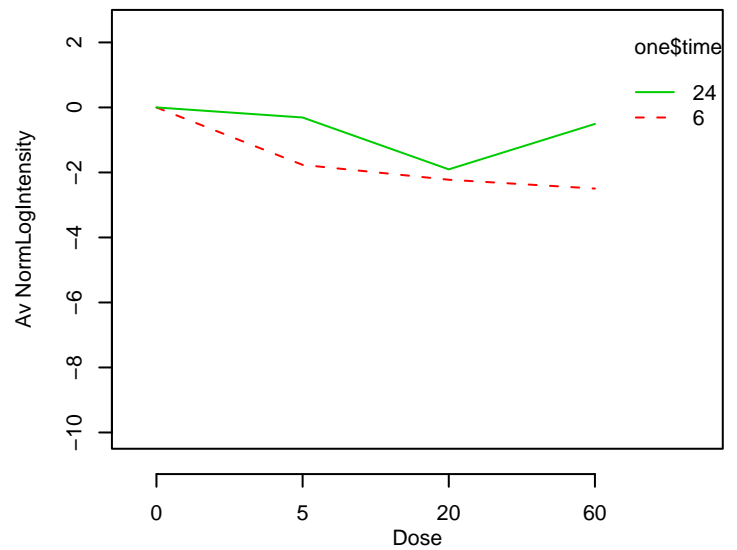

**GO\_0045161 : neuronal ion channel clustering**

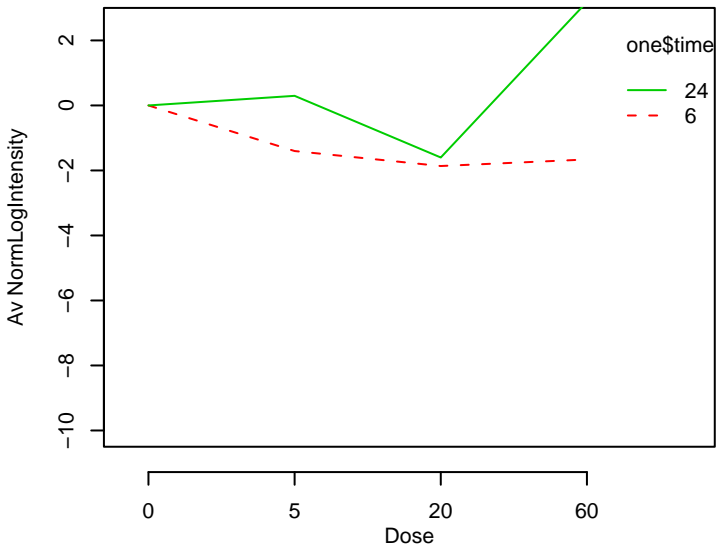

**GO\_0045165 : cell fate commitment**

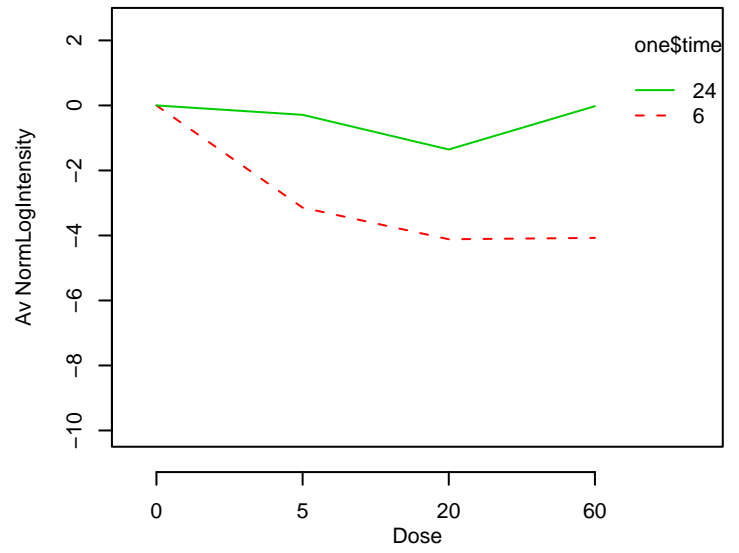

**GO\_0045168 : cell-cell signaling during cell fate commitme**

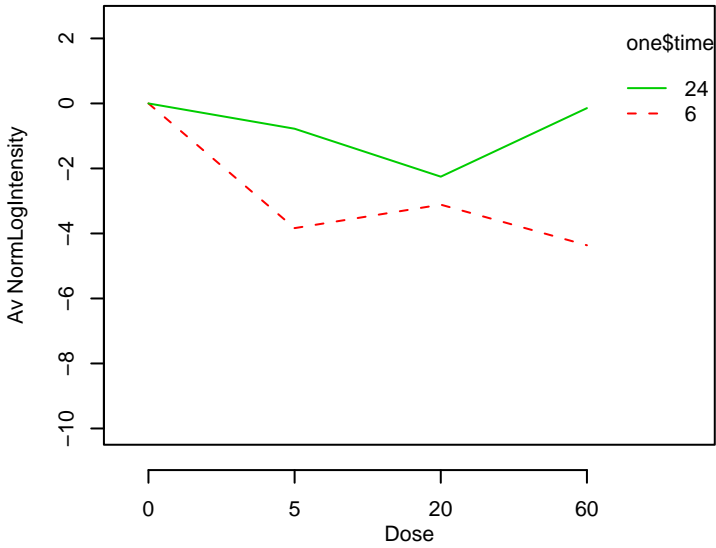

**GO\_0045176 : apical protein localization**

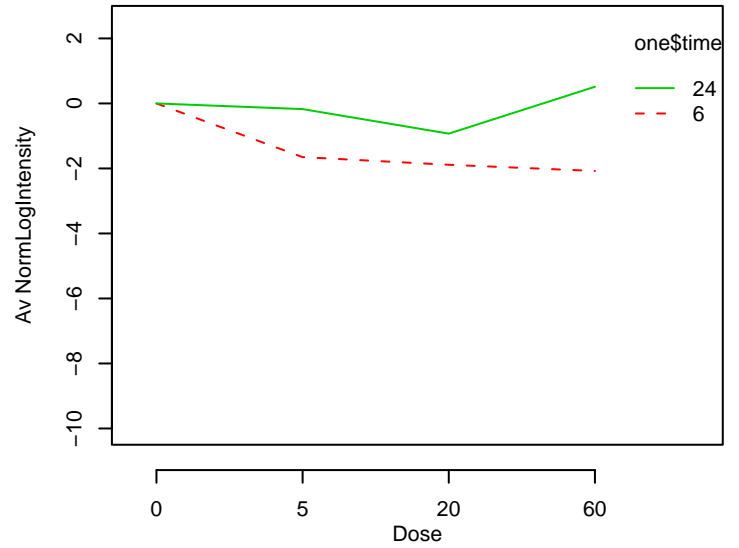

**GO\_0045185 : maintenance of protein localization**

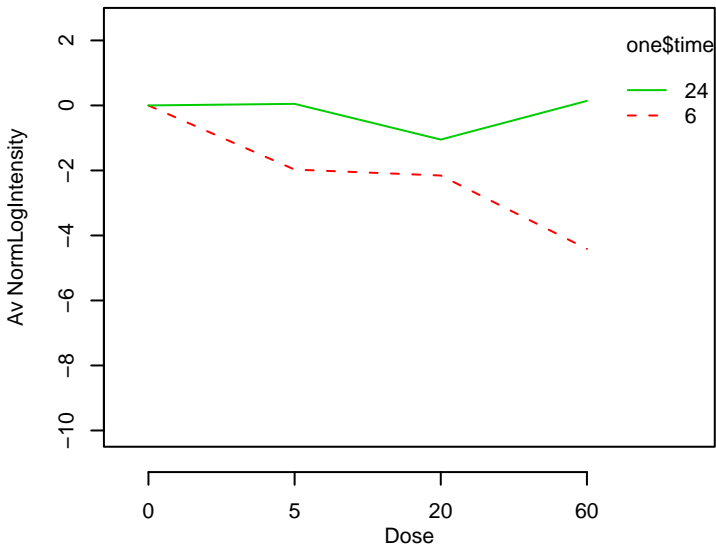

**GO\_0045190 : isotype switching**

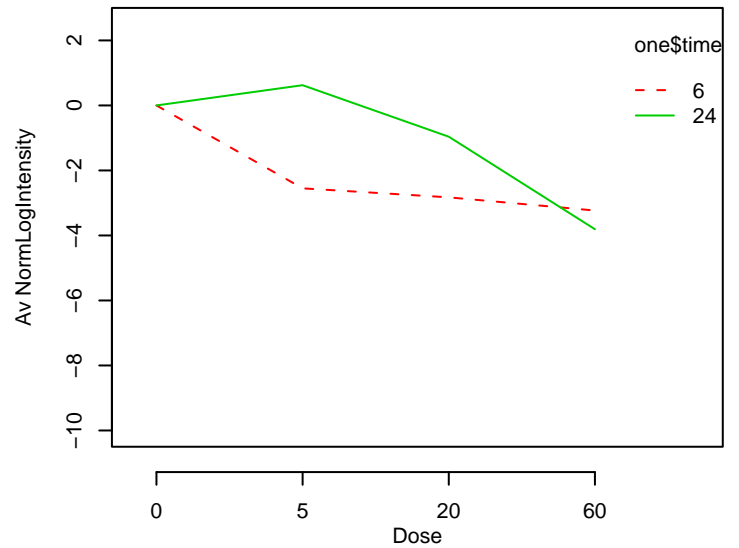

**GO\_0045191 : regulation of isotype switching**

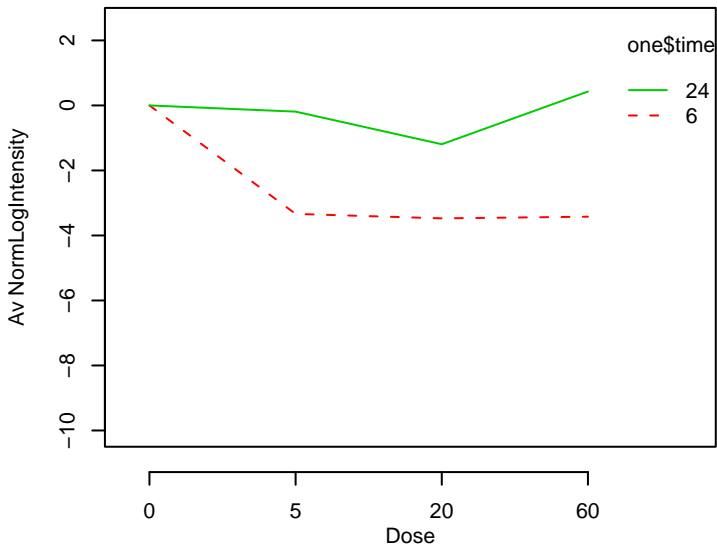

**GO\_0045197 : establishment and/or maintenance of epithelia**

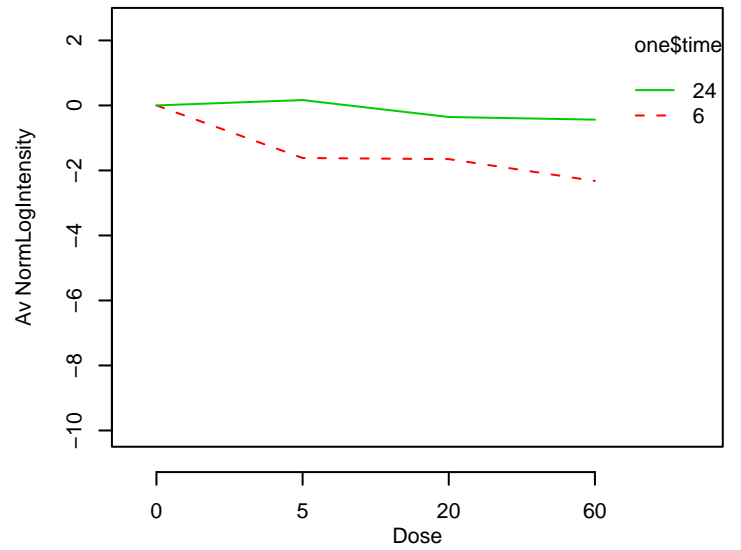

**GO\_0045216 : intercellular junction assembly and maintenai**

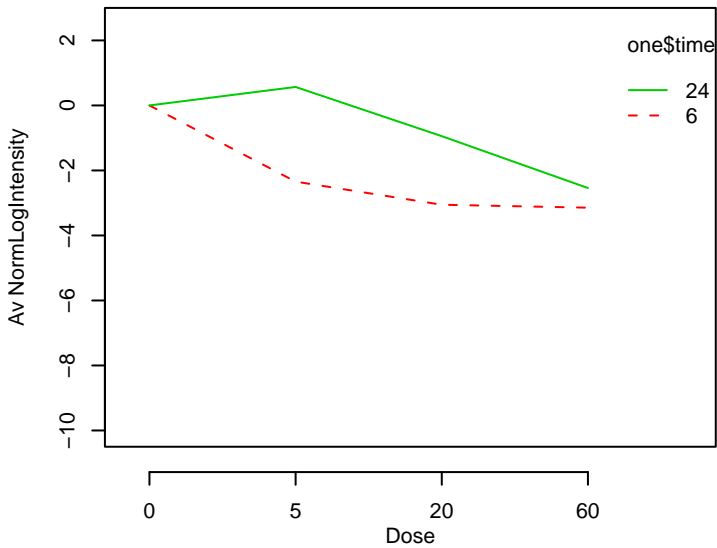

**GO\_0045321 : leukocyte activation**

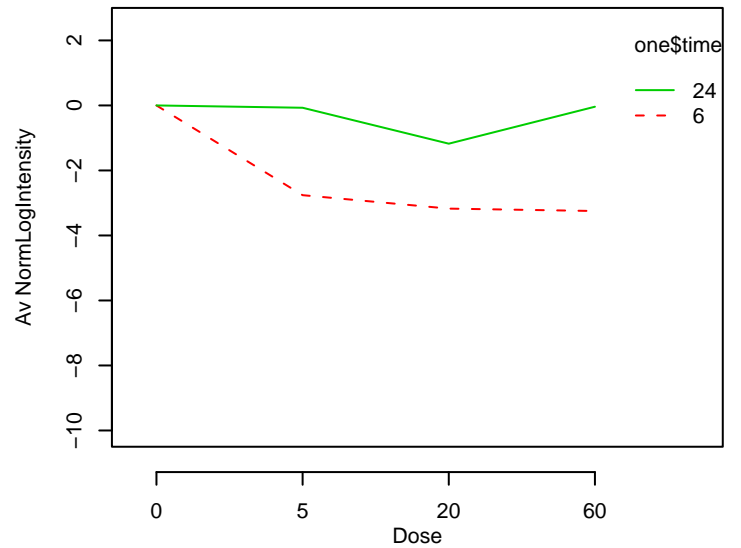

**GO\_0045333 : cellular respiration**

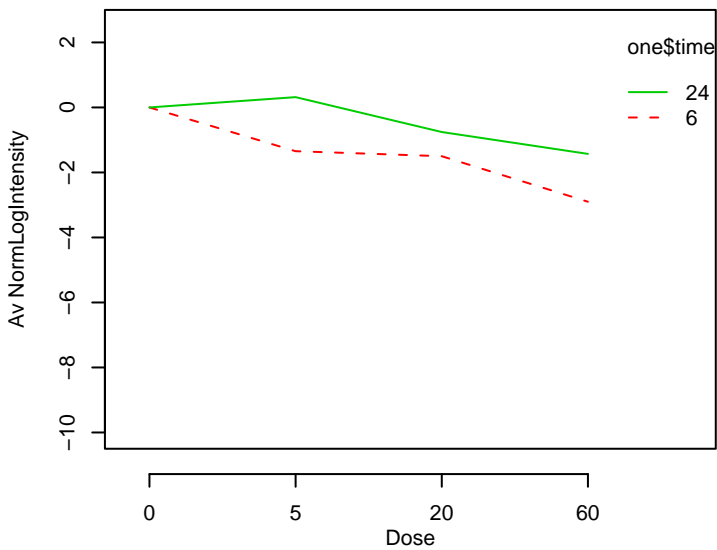

**GO\_0045342 : MHC class II biosynthesis**

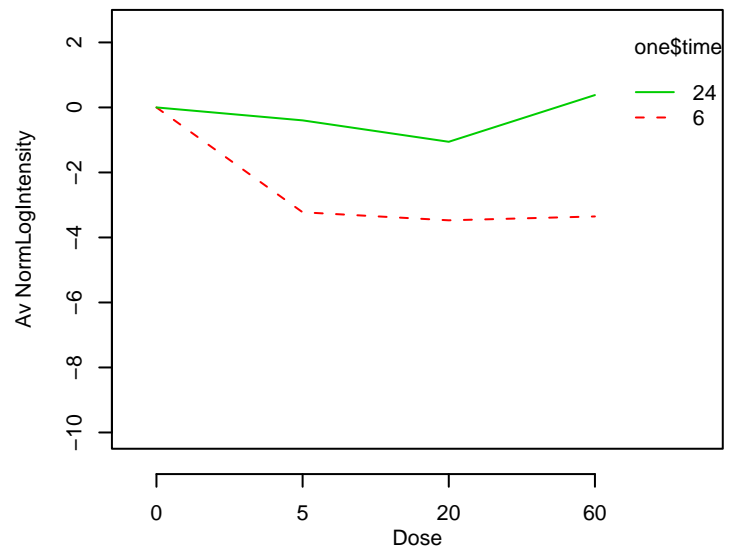

**GO\_0045346 : regulation of MHC class II biosynthesis**

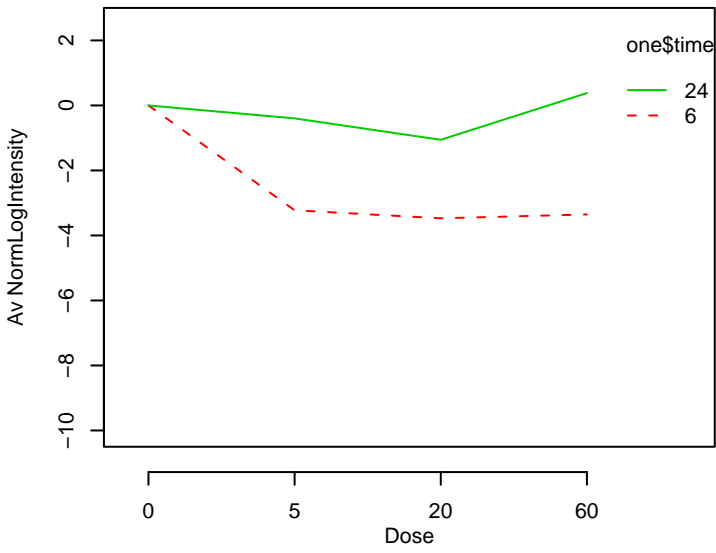

**GO\_0045349 : interferon-alpha biosynthesis**

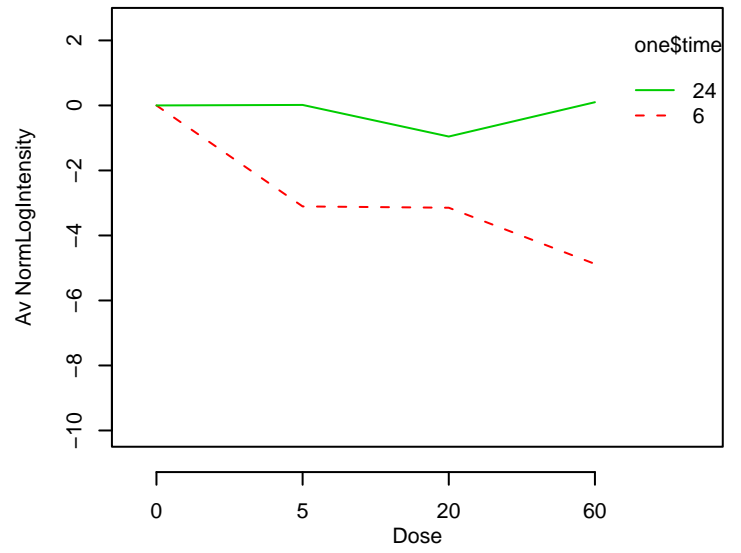

**GO\_0045351 : interferon type I biosynthesis**

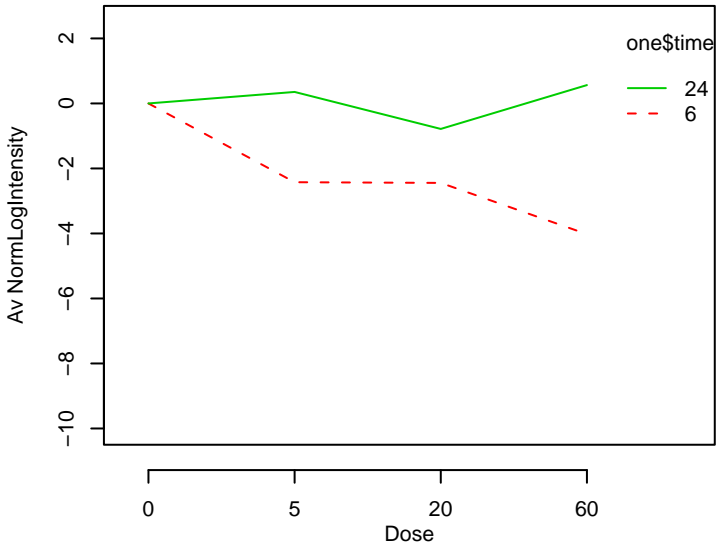

**GO\_0045354 : regulation of interferon-alpha biosynthesis**

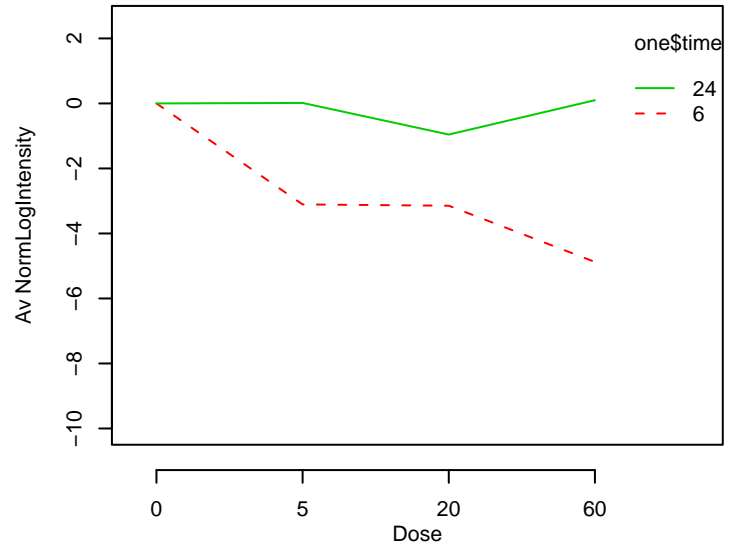

**GO\_0045408 : regulation of interleukin-6 biosynthesis**

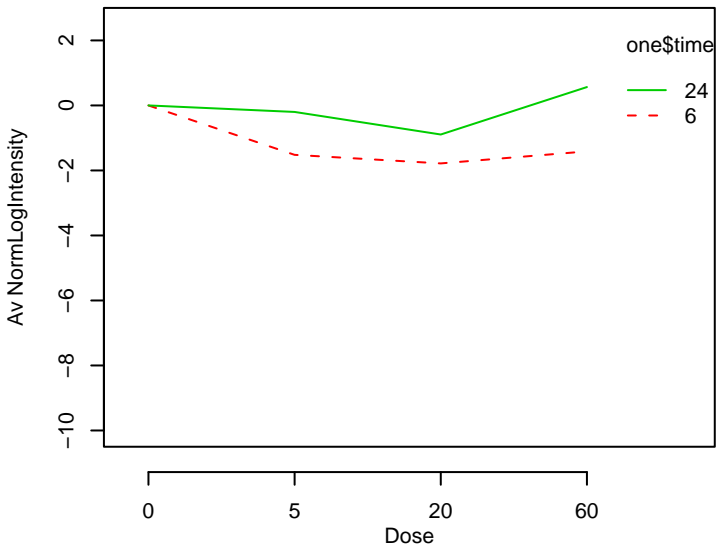

**GO\_0045410 : positive regulation of interleukin-6 biosynthesis**

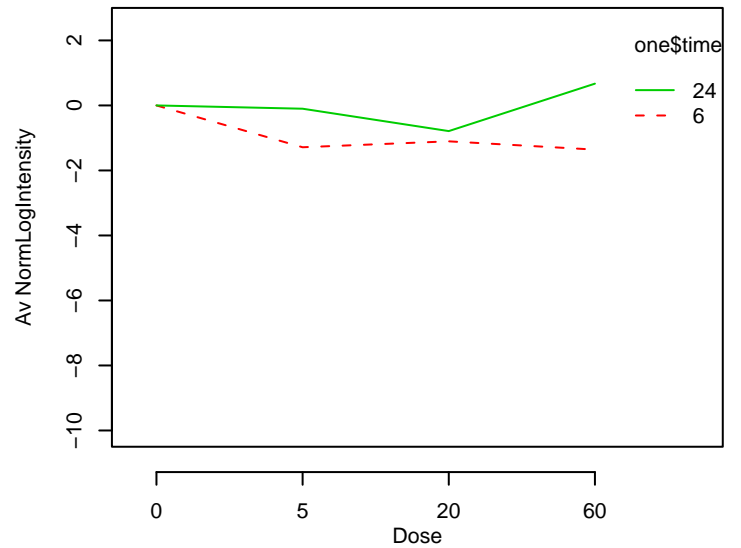



**GO\_0045414 : regulation of interleukin-8 biosynthesis**

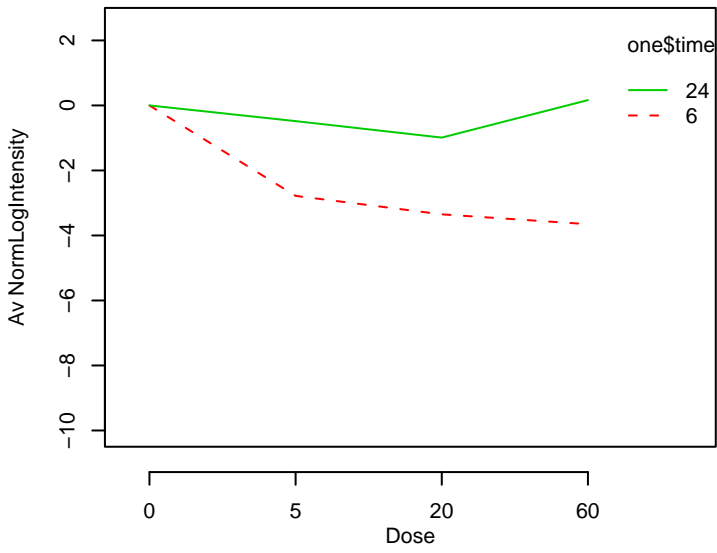

**GO\_0045416 : positive regulation of interleukin-8 biosynthe**

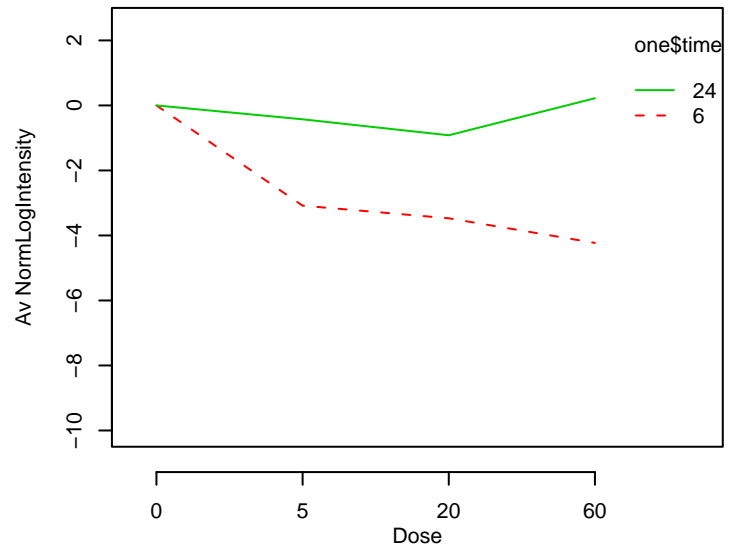

**GO\_0045426 : quinone cofactor biosynthesis**

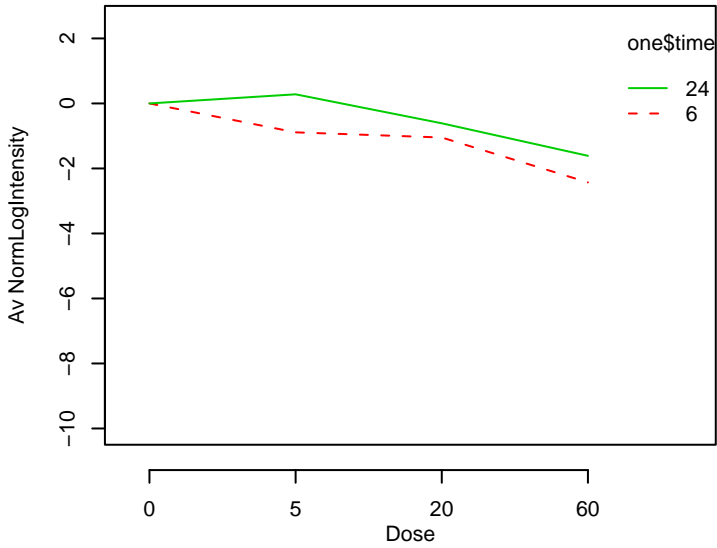

**GO\_0045428 : regulation of nitric oxide biosynthesis**

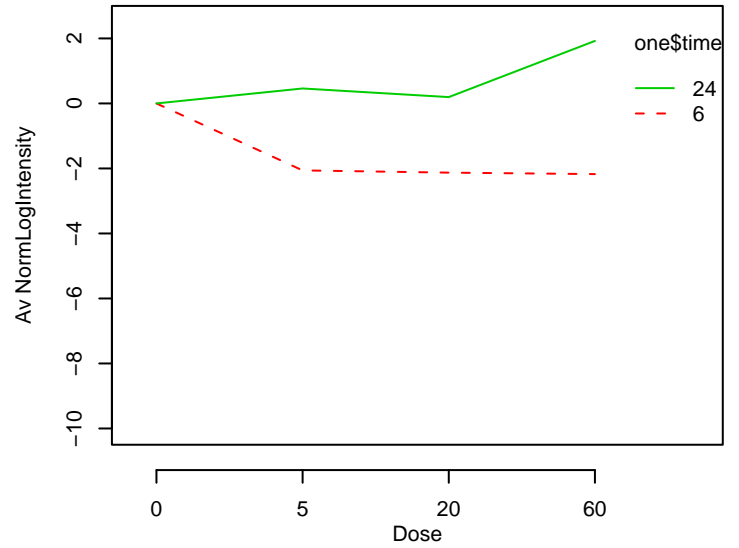

**GO\_0045444 : fat cell differentiation**

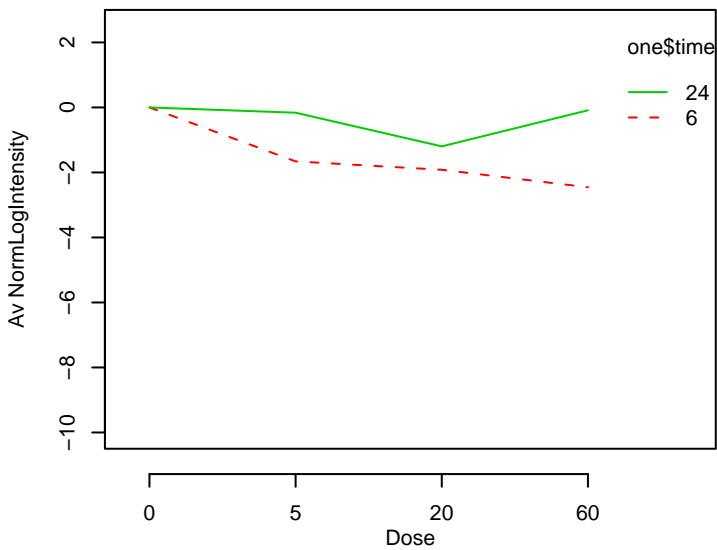

**GO\_0045445 : myoblast differentiation**

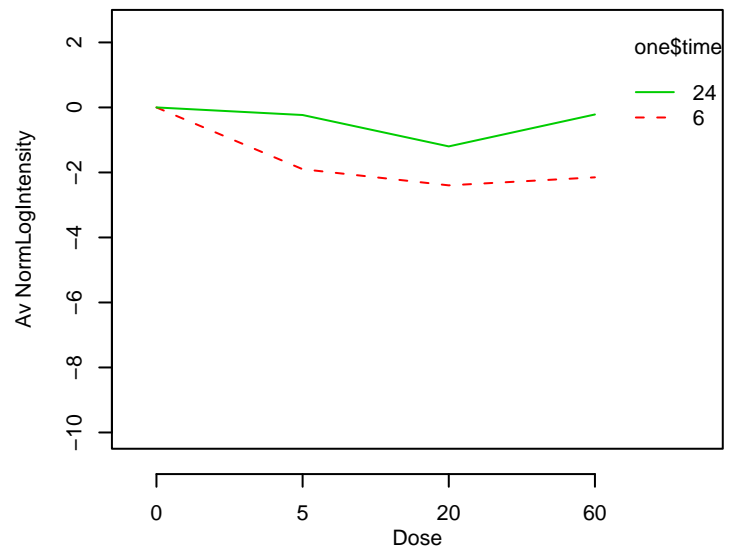

**GO\_0045446 : endothelial cell differentiation**

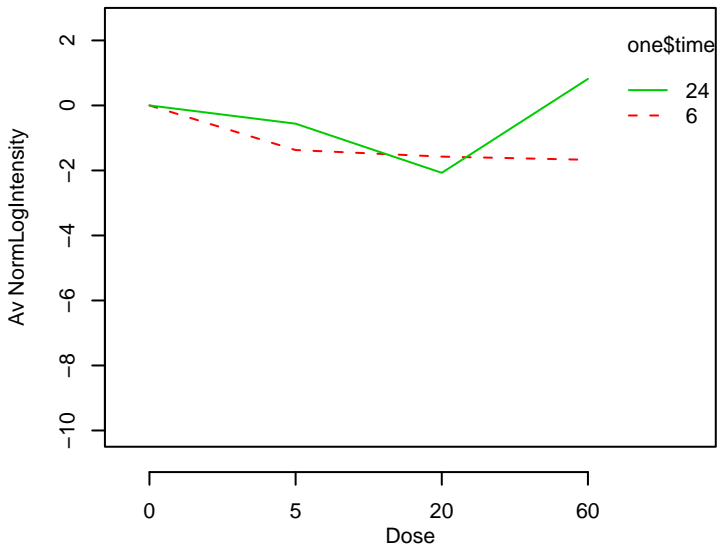

**GO\_0045453 : bone resorption**

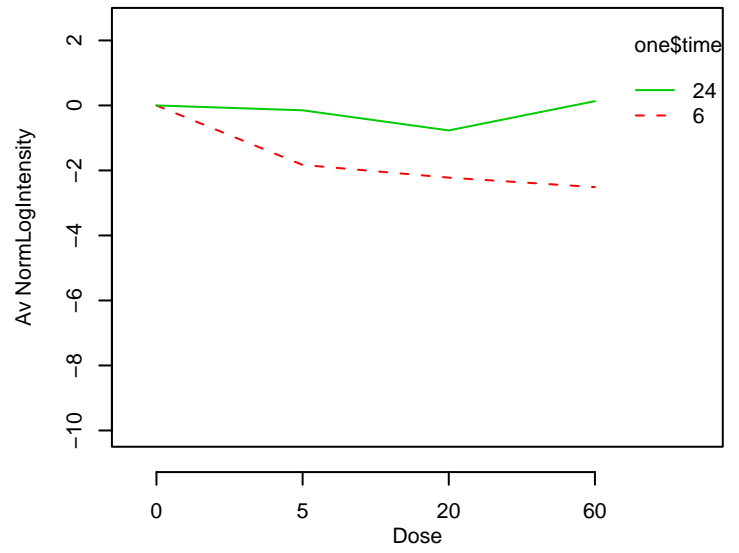

**GO\_0045454 : cell redox homeostasis**

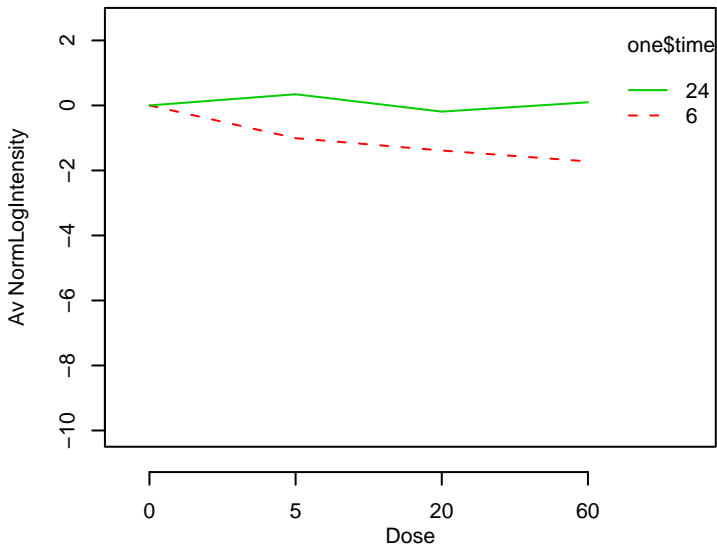

**GO\_0045494 : photoreceptor maintenance**

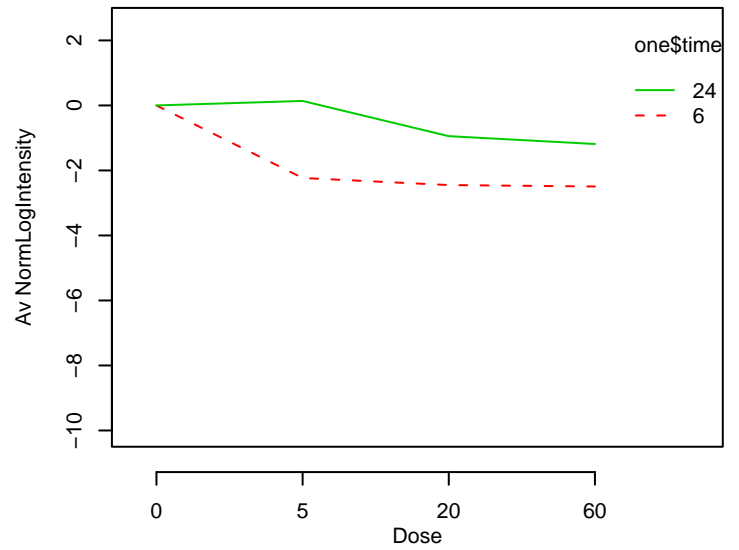

**GO\_0045576 : mast cell activation**

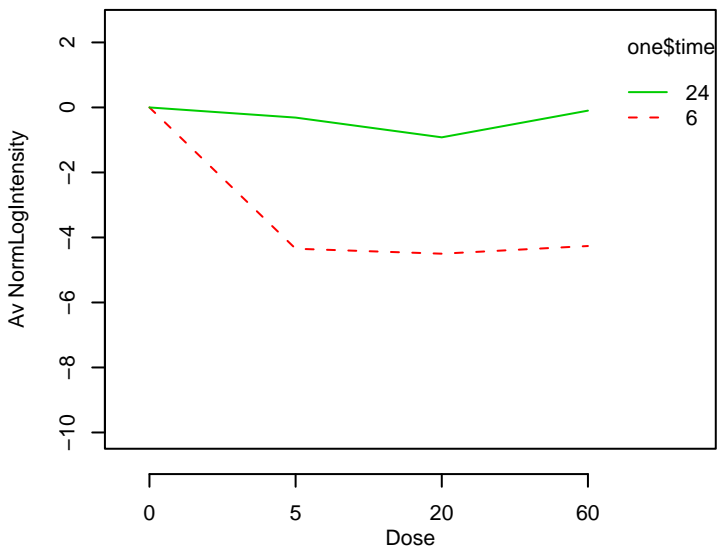

**GO\_0045577 : regulation of B cell differentiation**

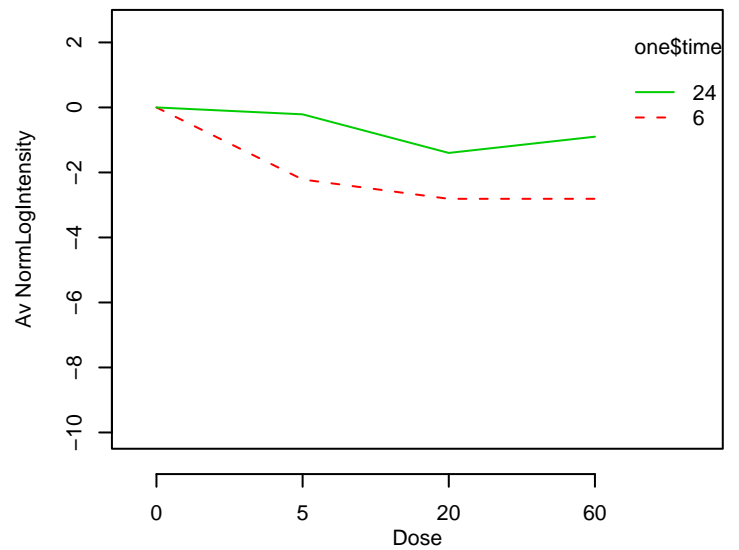

**GO\_0045579 : positive regulation of B cell differentiation**

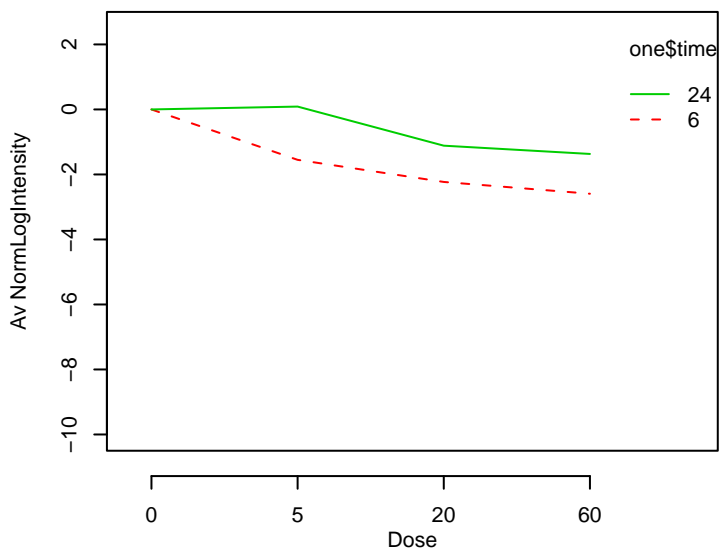

**GO\_0045580 : regulation of T cell differentiation**

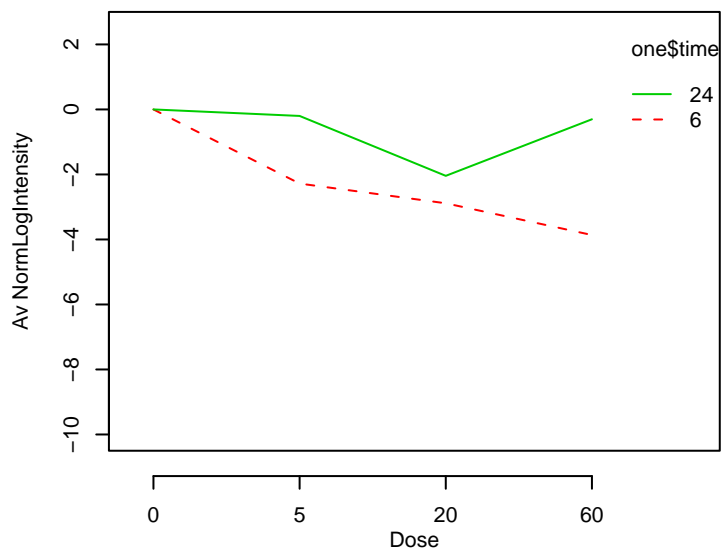

**GO\_0045582 : positive regulation of T cell differentiation**

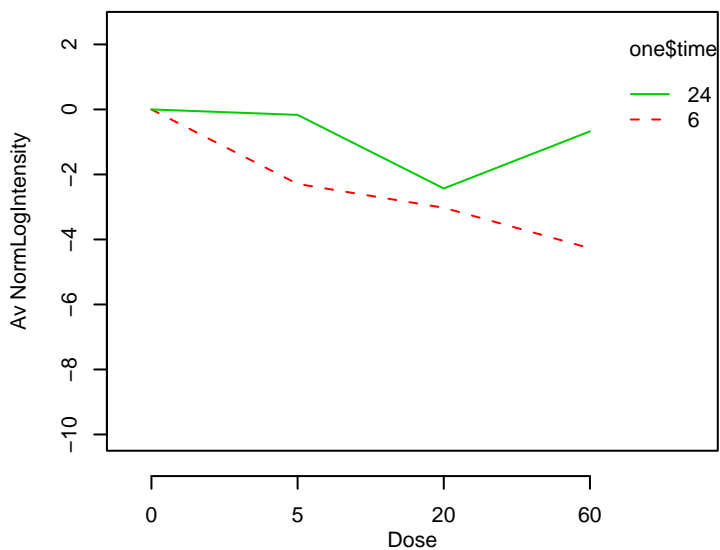

**GO\_0045595 : regulation of cell differentiation**

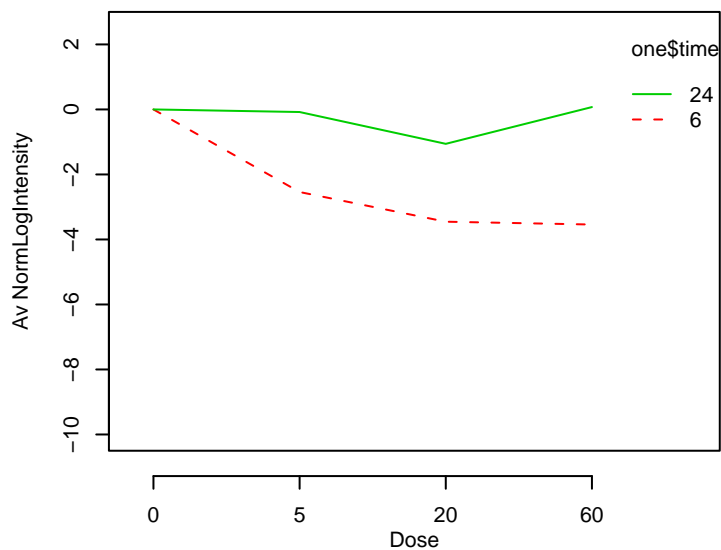

**GO\_0045596 : negative regulation of cell differentiation**

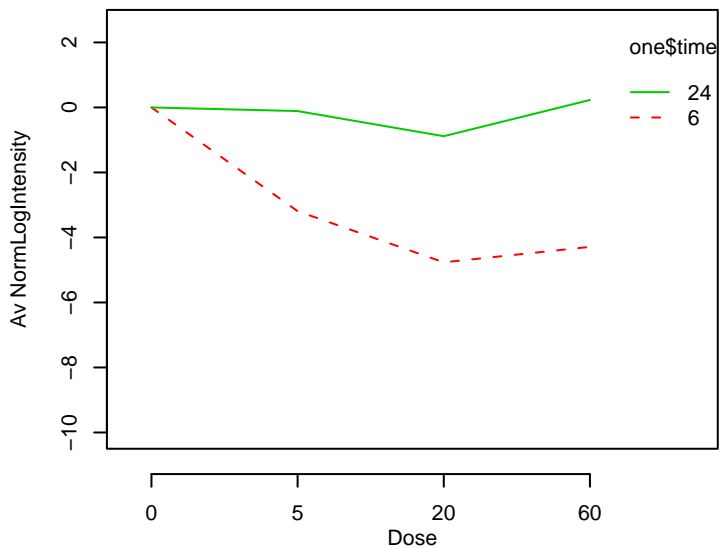

**GO\_0045597 : positive regulation of cell differentiation**

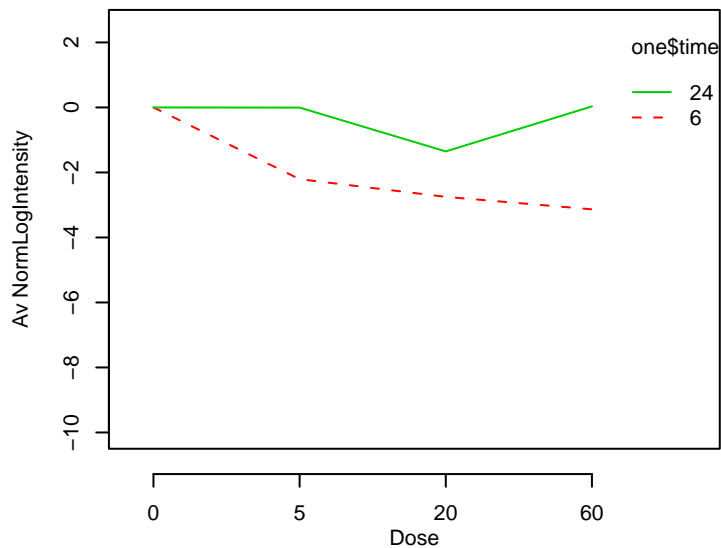

**GO\_0045598 : regulation of fat cell differentiation**

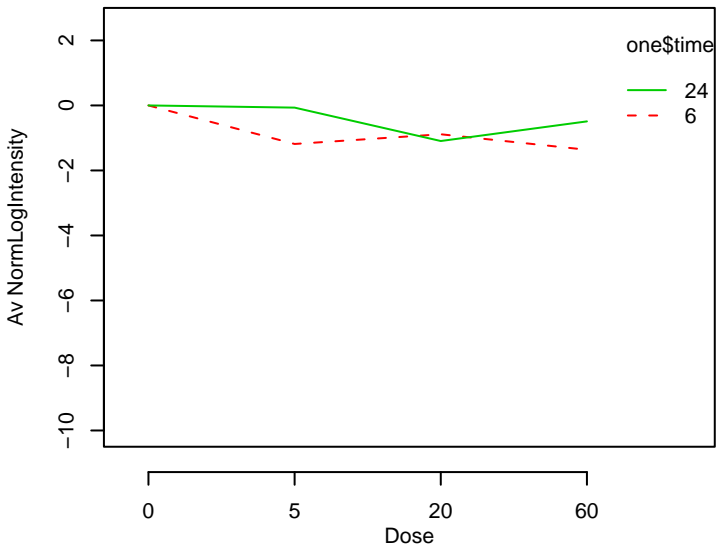

**GO\_0045604 : regulation of epidermal cell differentiation**

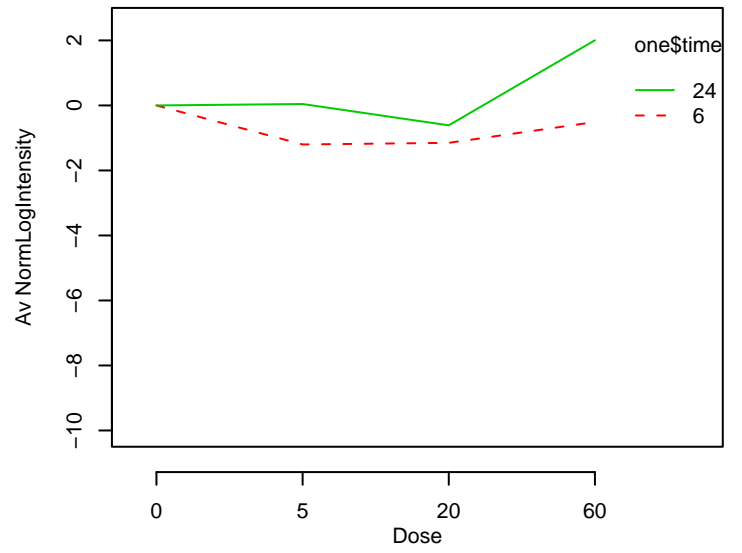

**GO\_0045619 : regulation of lymphocyte differentiation**

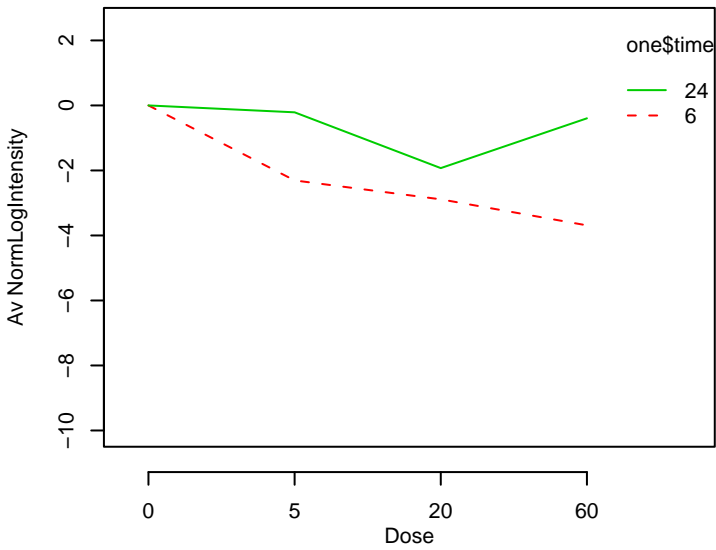

**GO\_0045620 : negative regulation of lymphocyte differentiation**

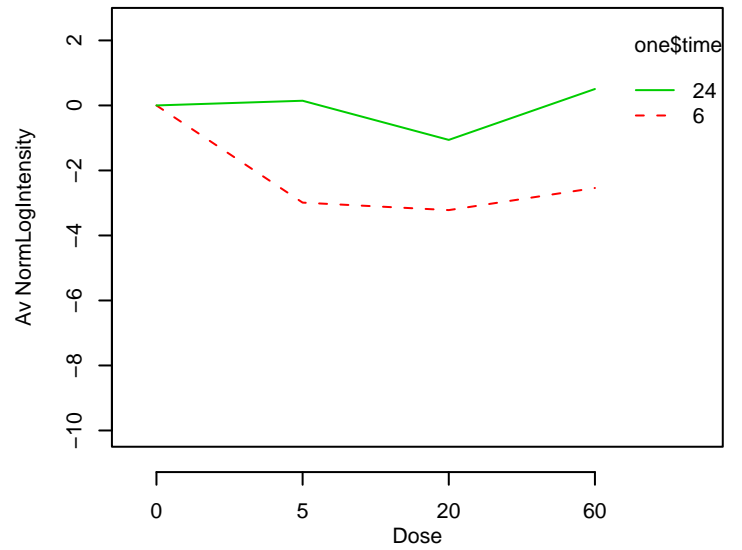

**GO\_0045621 : positive regulation of lymphocyte differentiation**

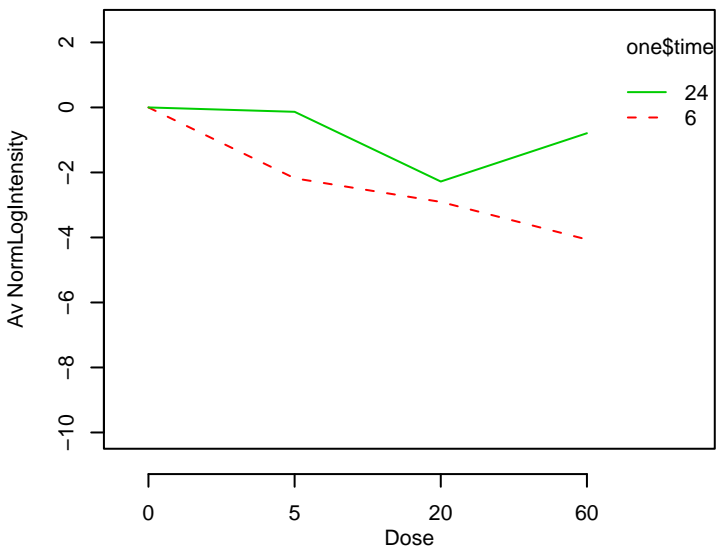

**GO\_0045622 : regulation of T-helper cell differentiation**

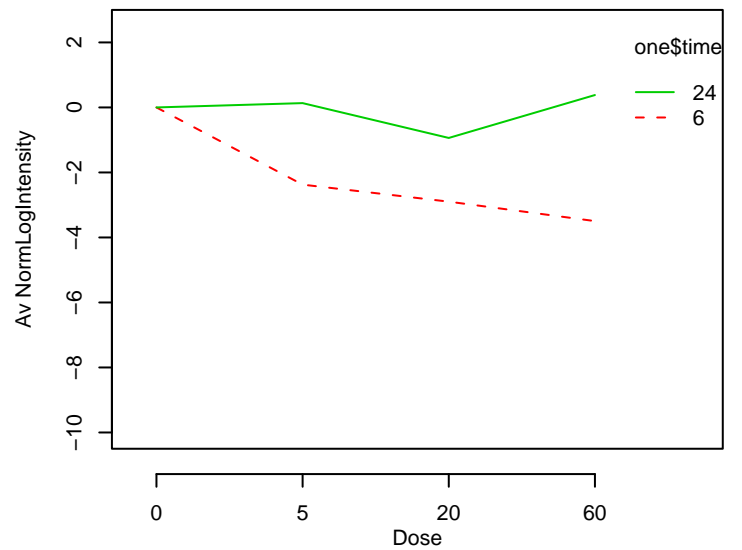

**GO\_0045637 : regulation of myeloid cell differentiation**

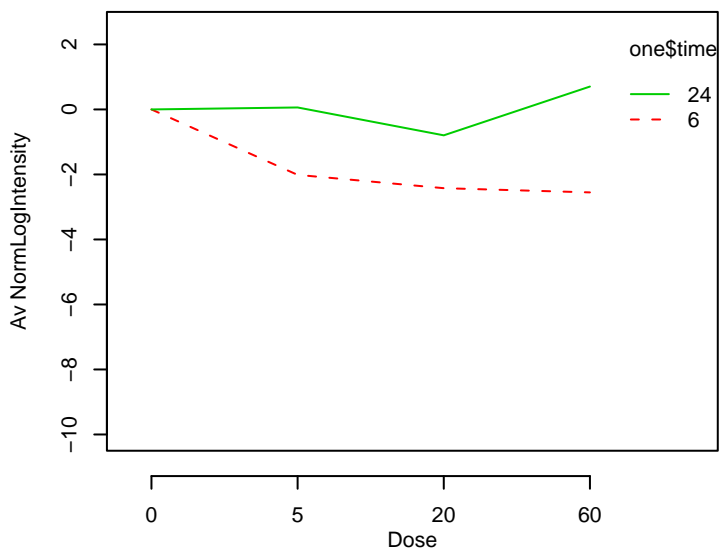

**GO\_0045638 : negative regulation of myeloid cell differentia**

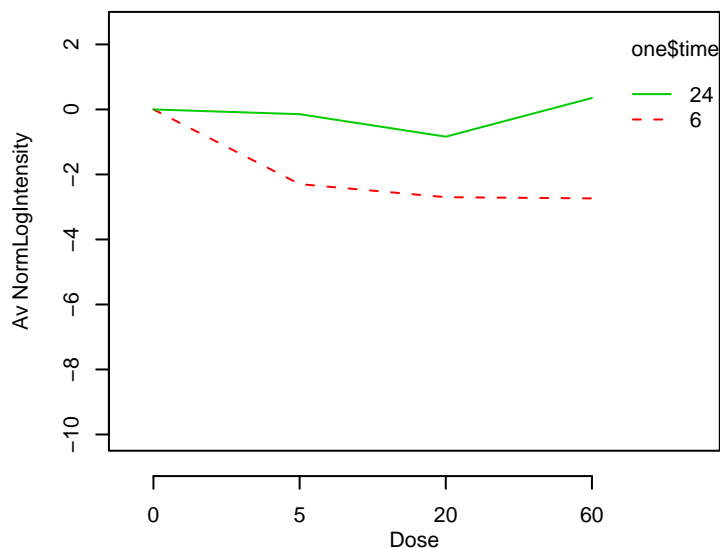

**GO\_0045639 : positive regulation of myeloid cell differentia**

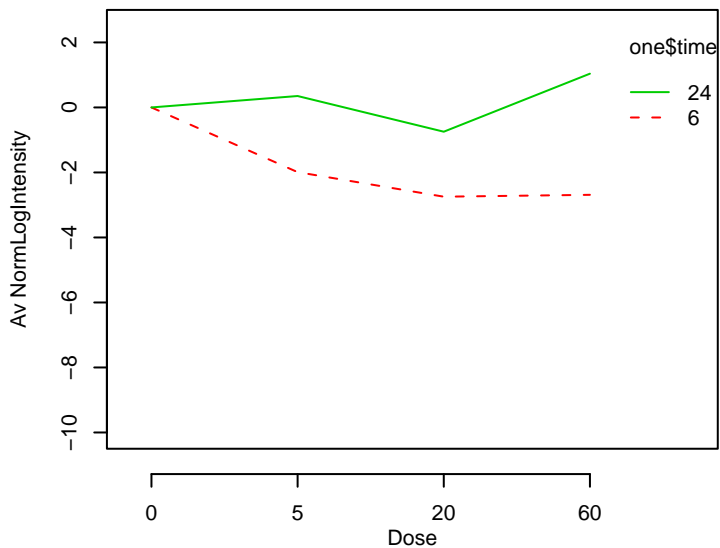

**GO\_0045646 : regulation of erythrocyte differentiation**

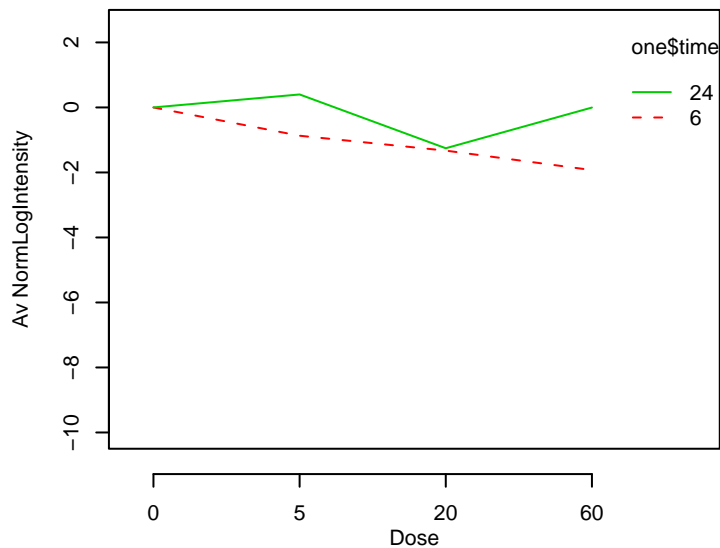

**GO\_0045655 : regulation of monocyte differentiation**

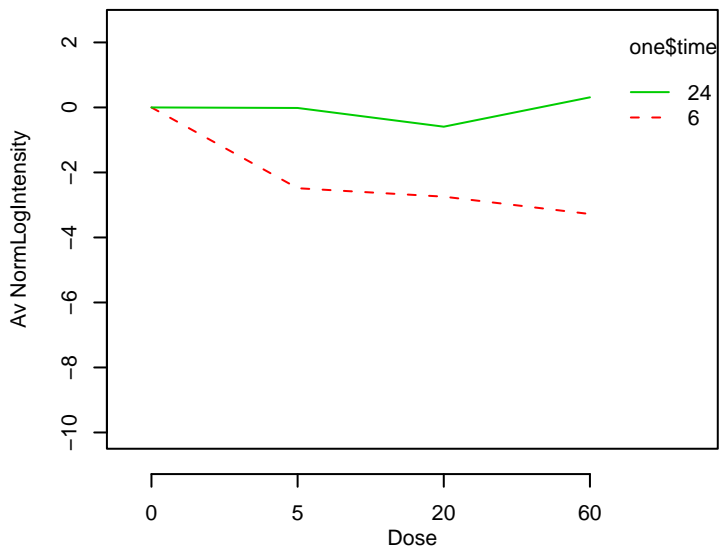

**GO\_0045656 : negative regulation of monocyte differentia**

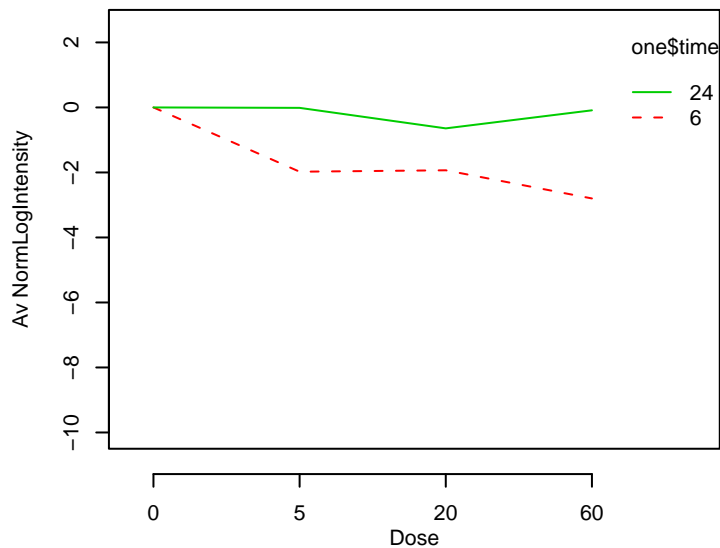

**GO\_0045661 : regulation of myoblast differentiation**

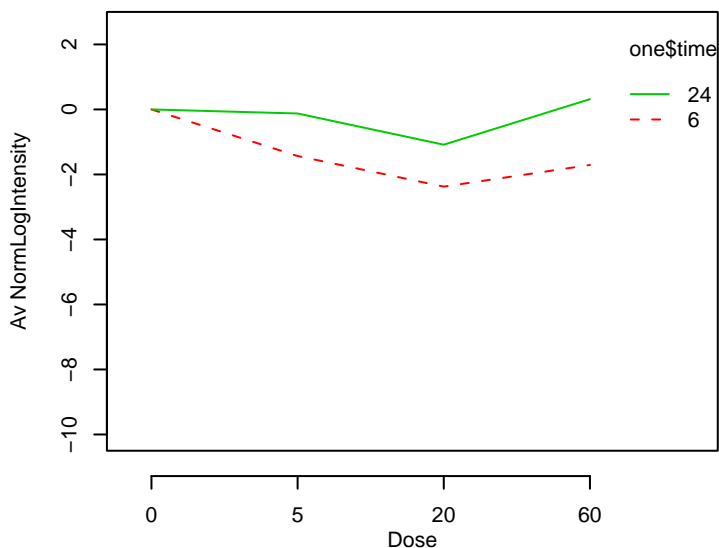

**GO\_0045664 : regulation of neuron differentiation**

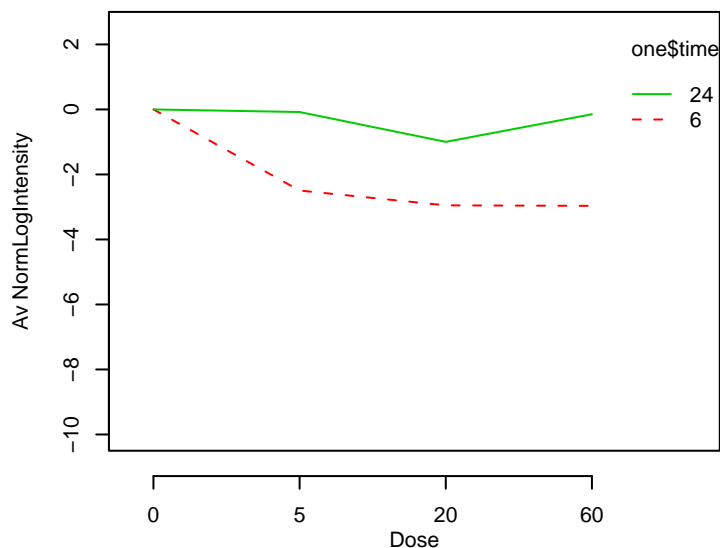

**GO\_0045665 : negative regulation of neuron differentiation**

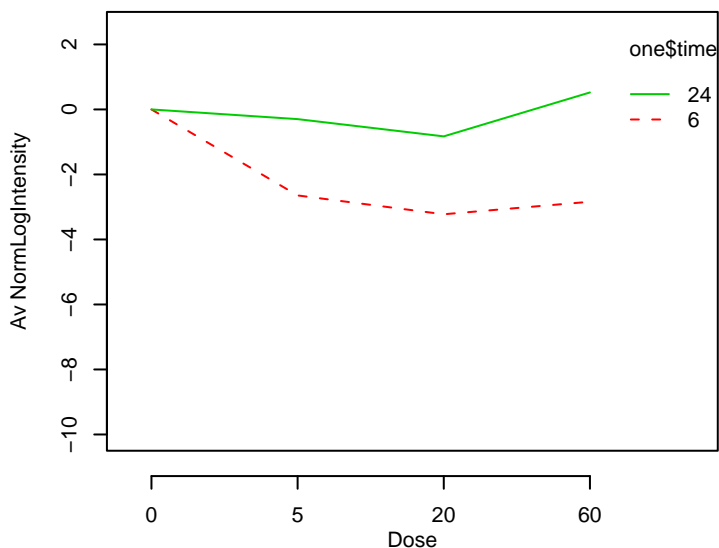

**GO\_0045667 : regulation of osteoblast differentiation**

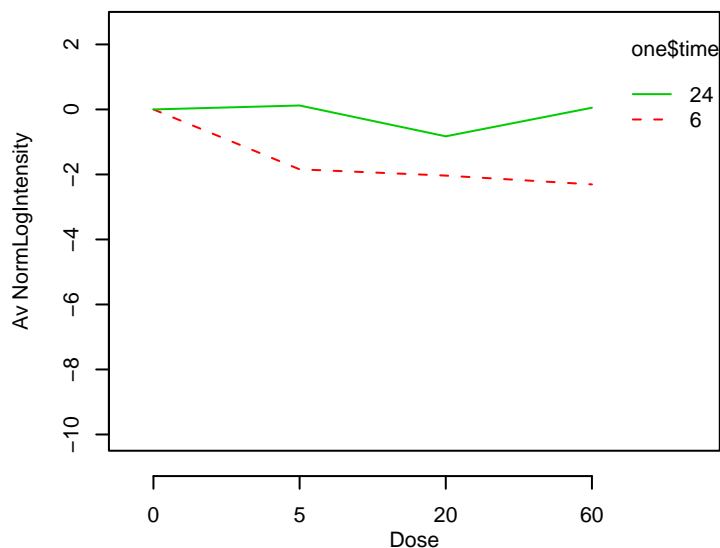

**GO\_0045670 : regulation of osteoclast differentiation**

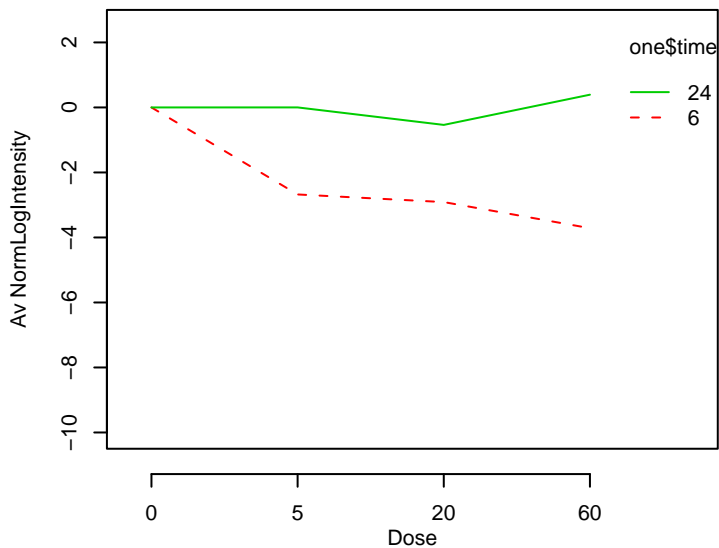

**GO\_0045682 : regulation of epidermis development**

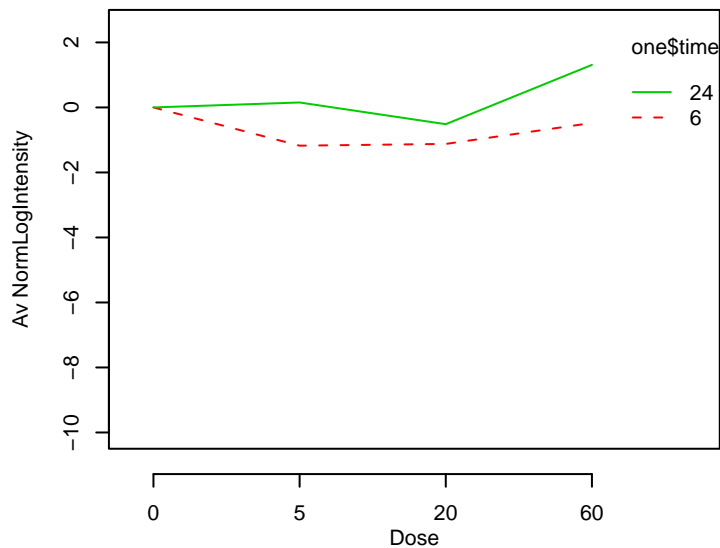

**GO\_0045727 : positive regulation of protein biosynthesis** **GO\_0045736 : negative regulation of cyclin-dependent prote**

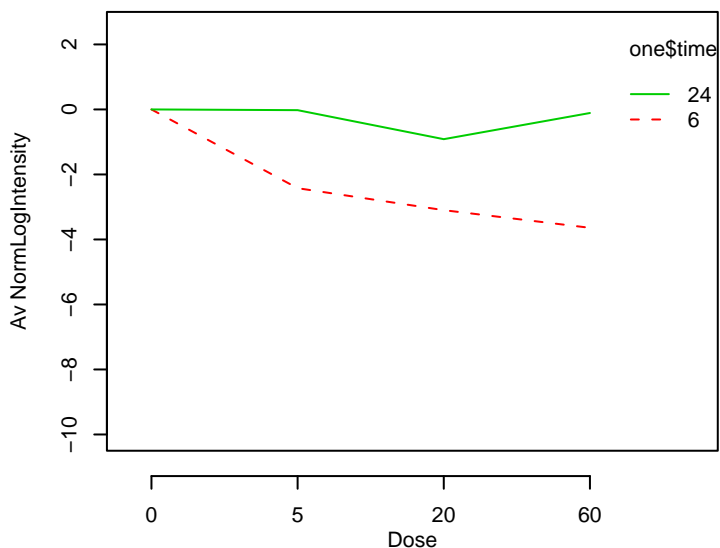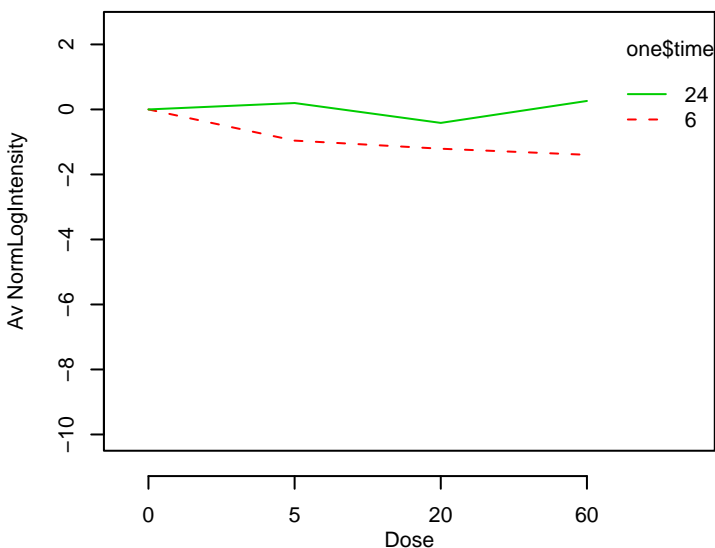

**GO\_0045744 : negative regulation of G-protein coupled rece**

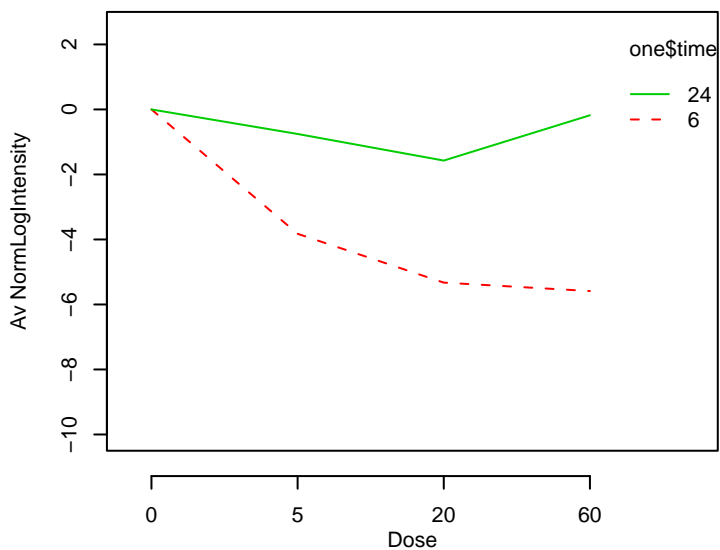

**GO\_0045761 : regulation of adenylate cyclase activity**

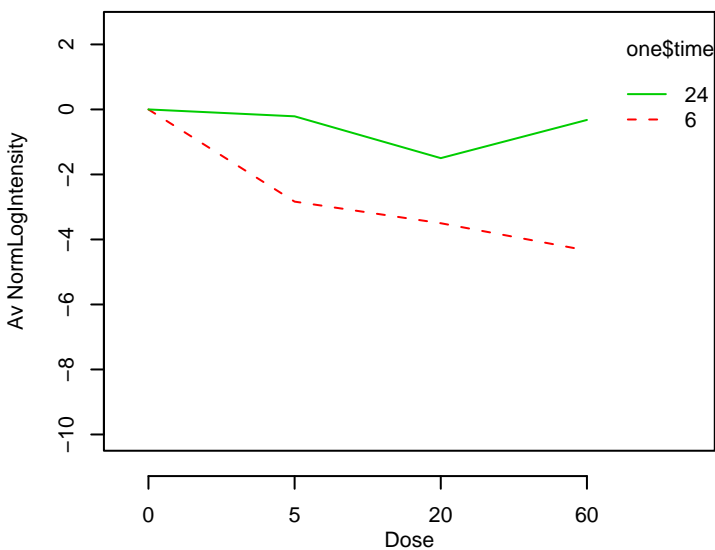

**GO\_0045762 : positive regulation of adenylate cyclase activ**

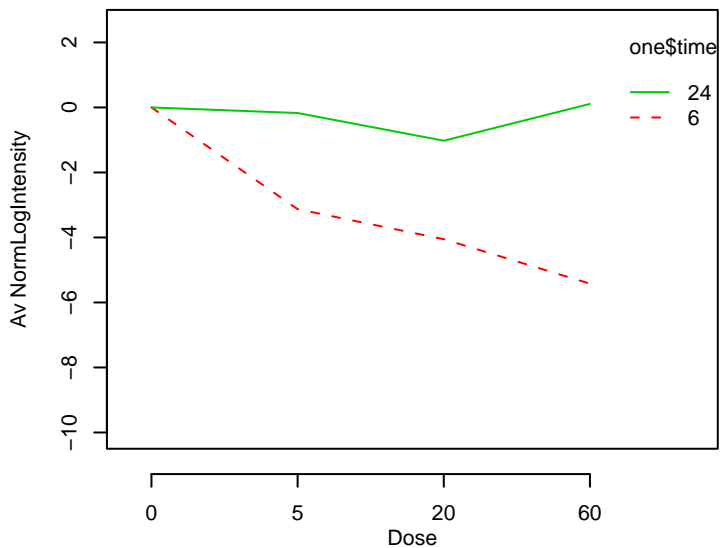

**GO\_0045763 : negative regulation of amino acid metabolis**

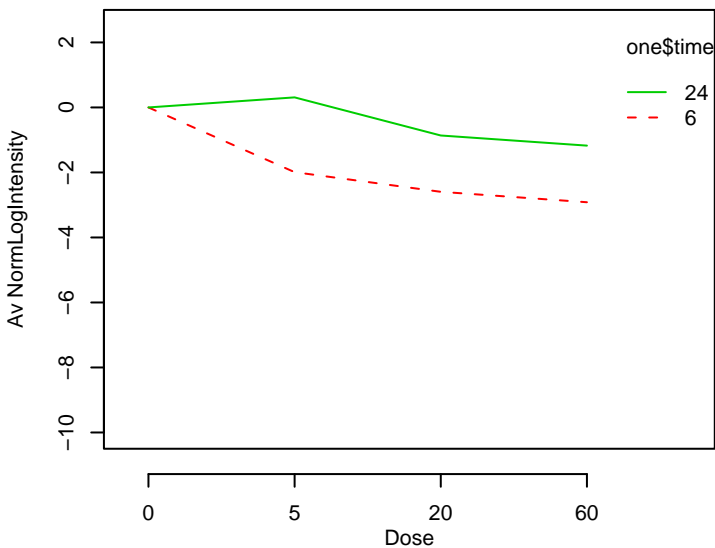

**GO\_0045764 : positive regulation of amino acid metabolism**

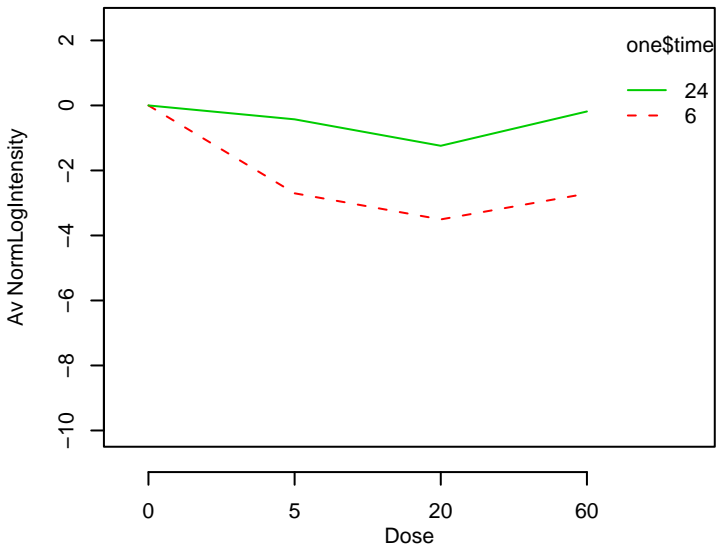

**GO\_0045765 : regulation of angiogenesis**

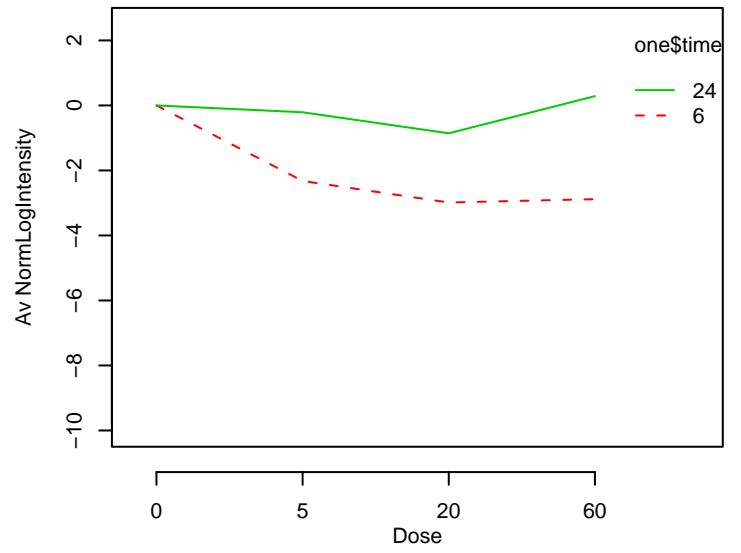

**GO\_0045766 : positive regulation of angiogenesis**

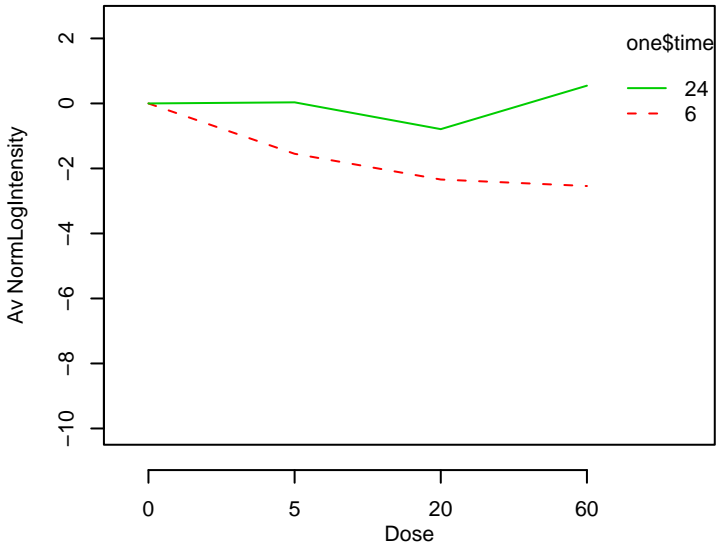

**GO\_0045767 : regulation of anti-apoptosis**

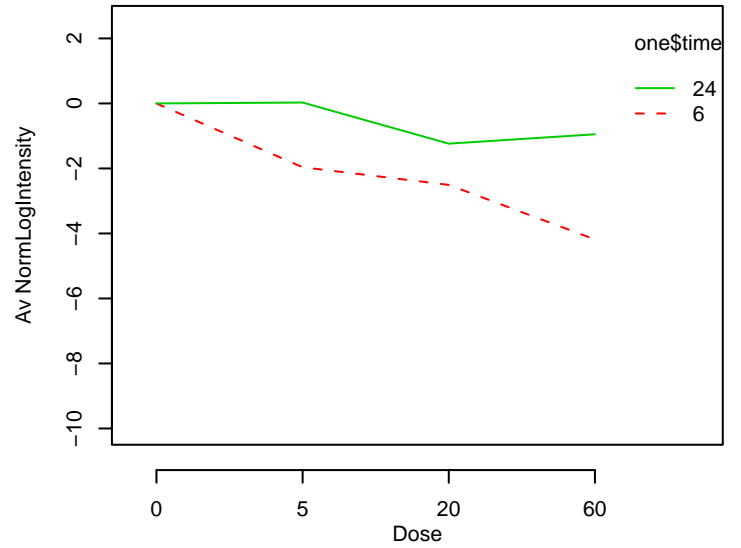

**GO\_0045768 : positive regulation of anti-apoptosis**

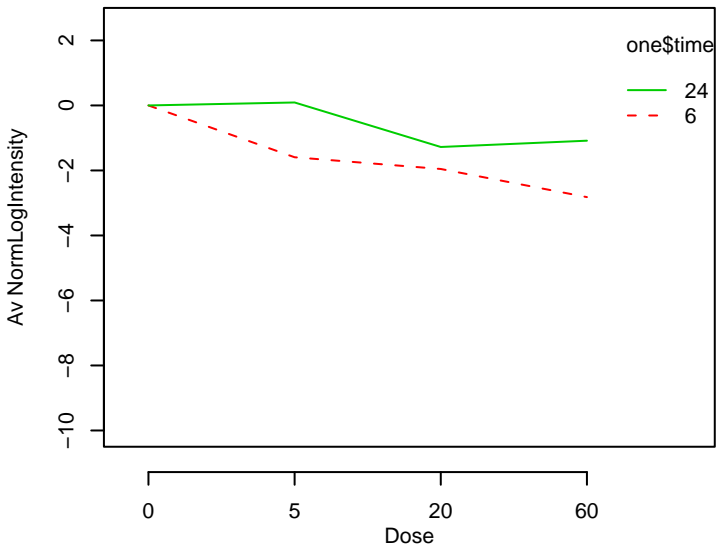

**GO\_0045773 : positive regulation of axon extension**

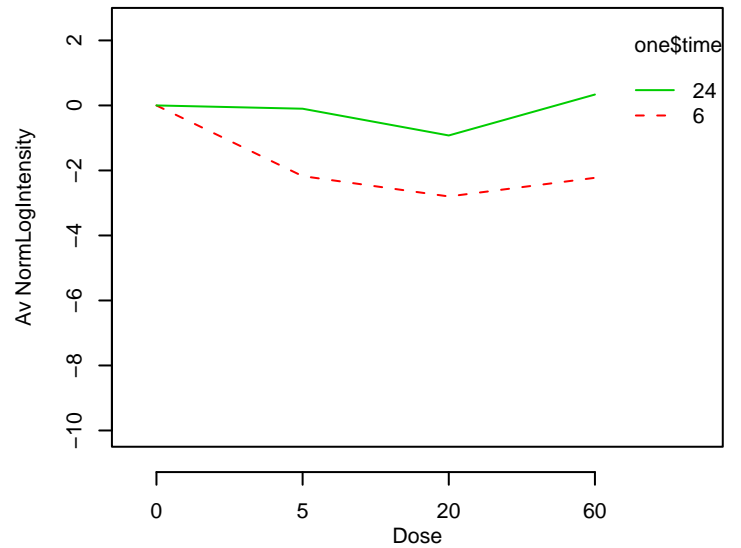



**GO\_0045778 : positive regulation of ossification**

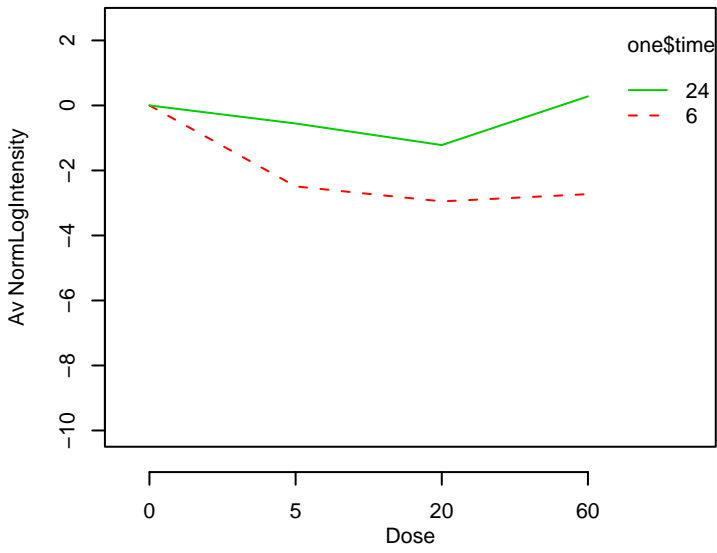

**GO\_0045785 : positive regulation of cell adhesion**

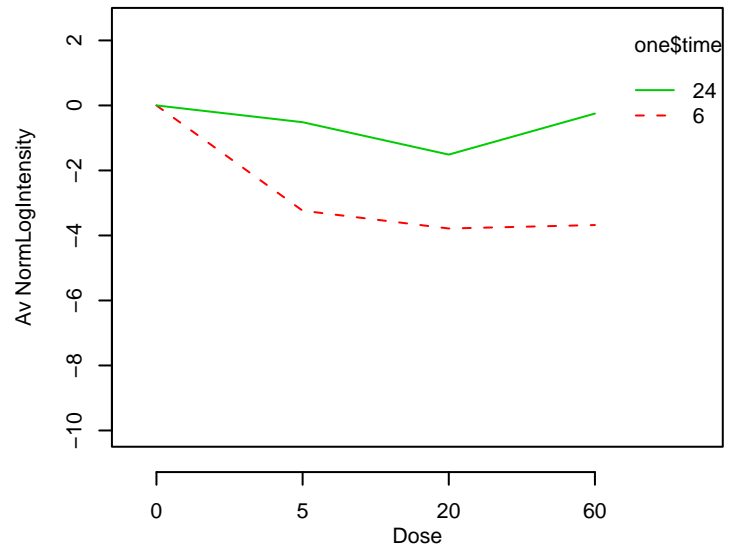

**GO\_0045786 : negative regulation of progression through cell cycle** **GO\_0045787 : positive regulation of progression through cell cycle**

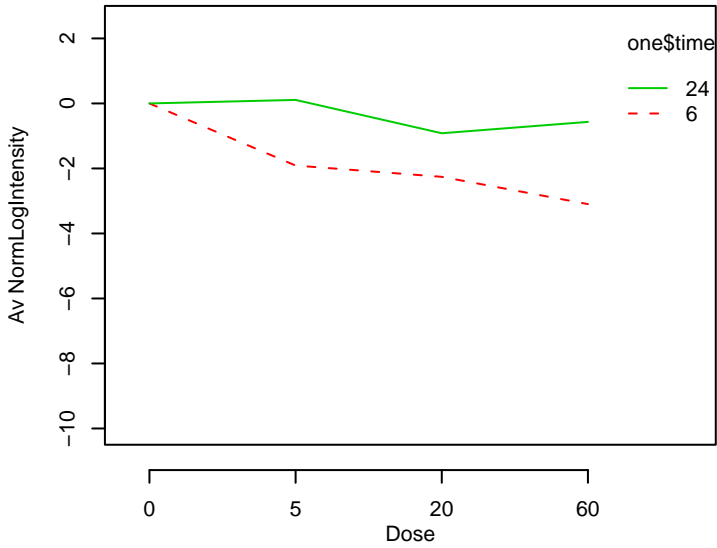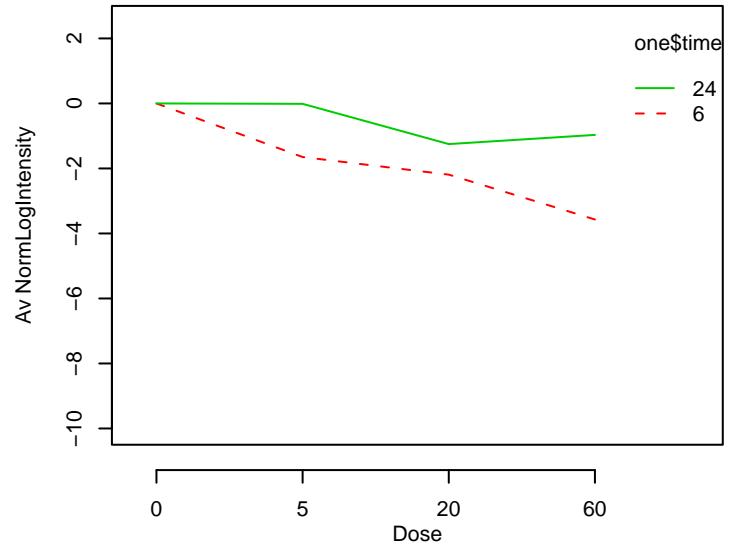

**GO\_0045792 : negative regulation of cell size**

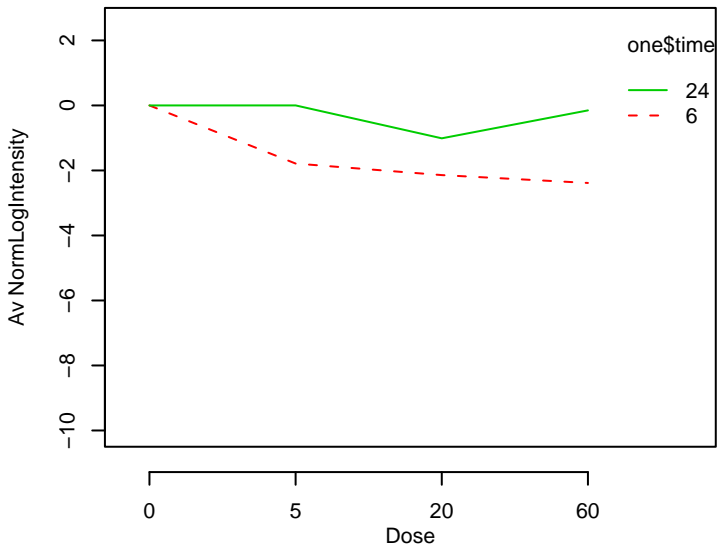

**GO\_0045793 : positive regulation of cell size**

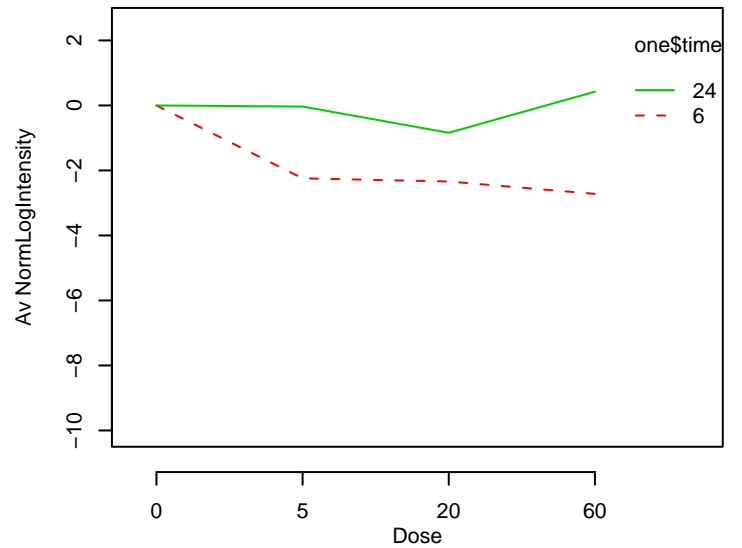

**GO\_0045806 : negative regulation of endocytosis**

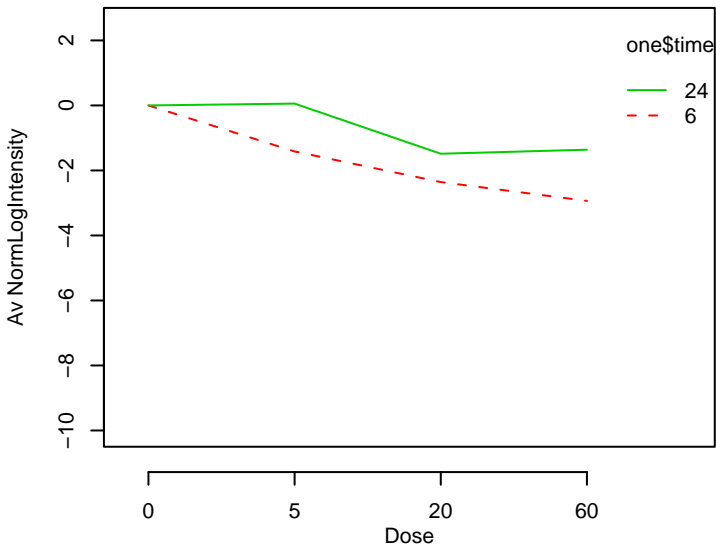

**GO\_0045807 : positive regulation of endocytosis**

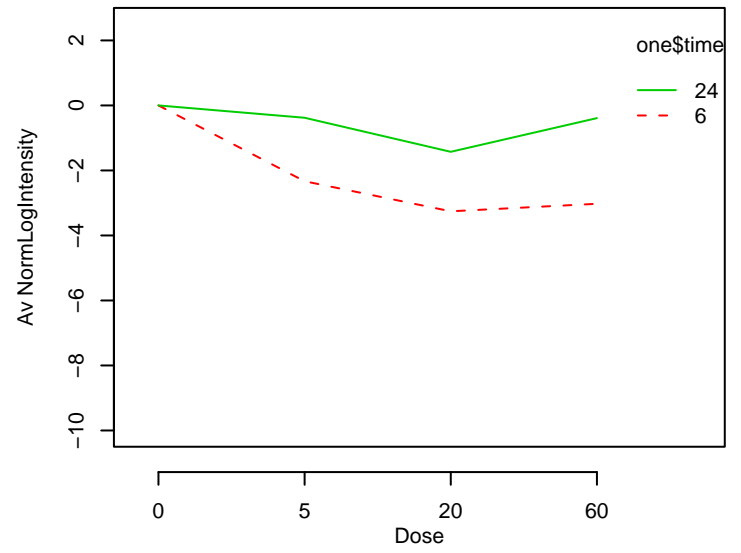

**GO\_0045814 : negative regulation of gene expression\, epige** **GO\_0045815 : positive regulation of gene expression\, epige**

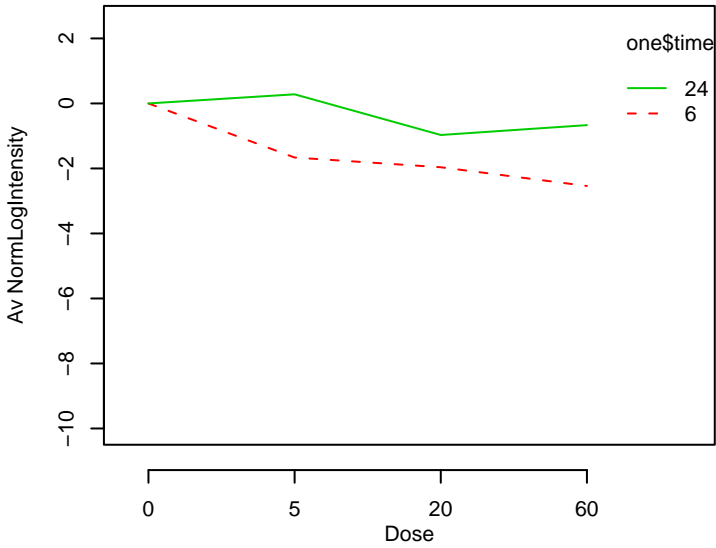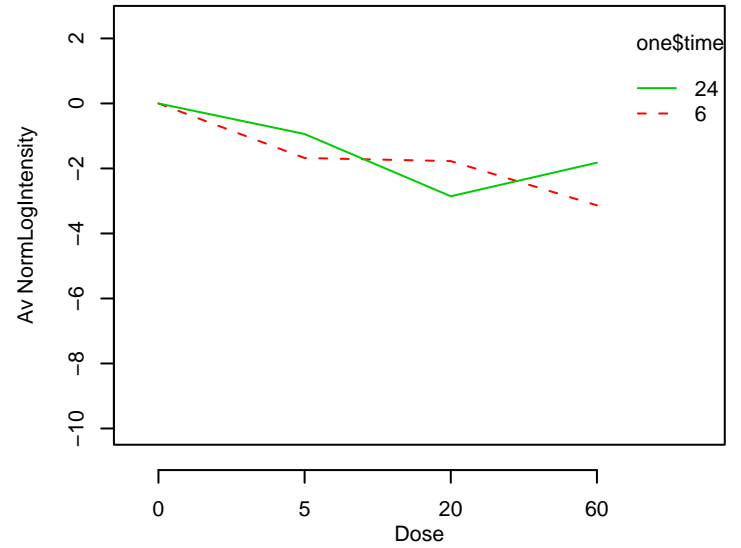

**GO\_0045823 : positive regulation of heart contraction**

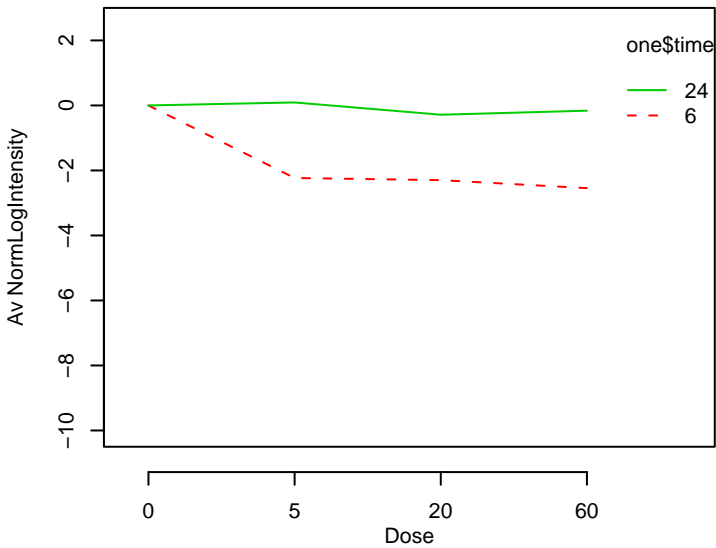

**GO\_0045830 : positive regulation of isotype switching**

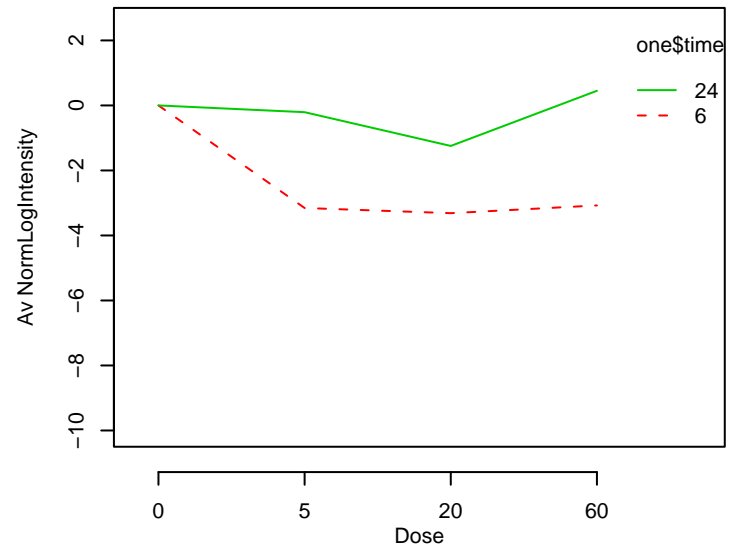

**GO\_0045834 : positive regulation of lipid metabolism**

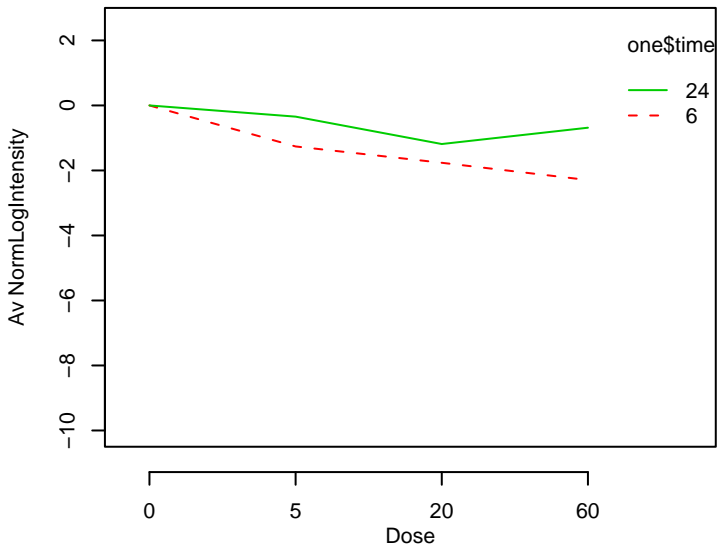

**GO\_0045840 : positive regulation of mitosis**

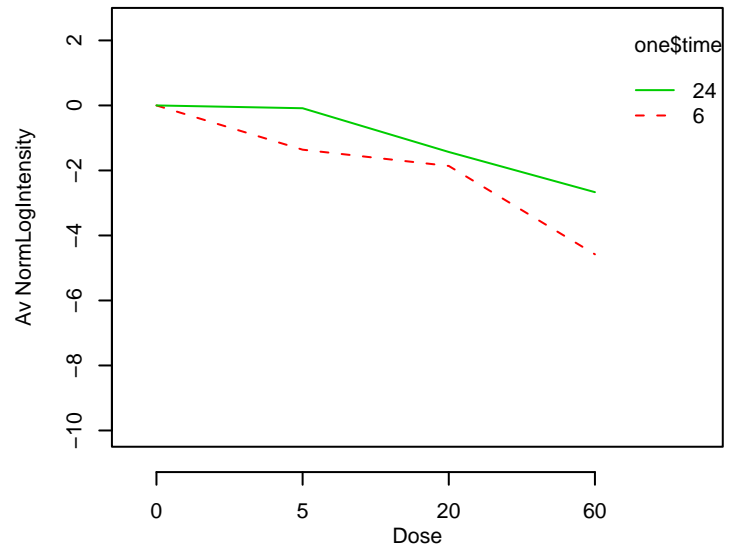

**GO\_0045843 : negative regulation of striated muscle develop**

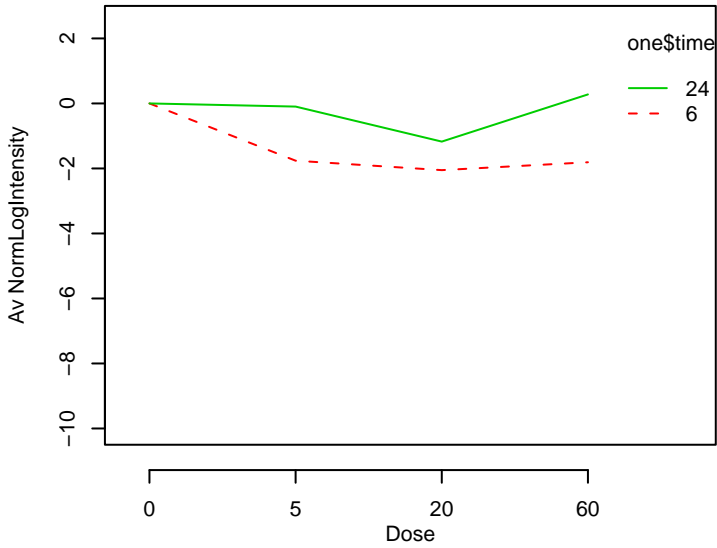

**GO\_0045851 : pH reduction**

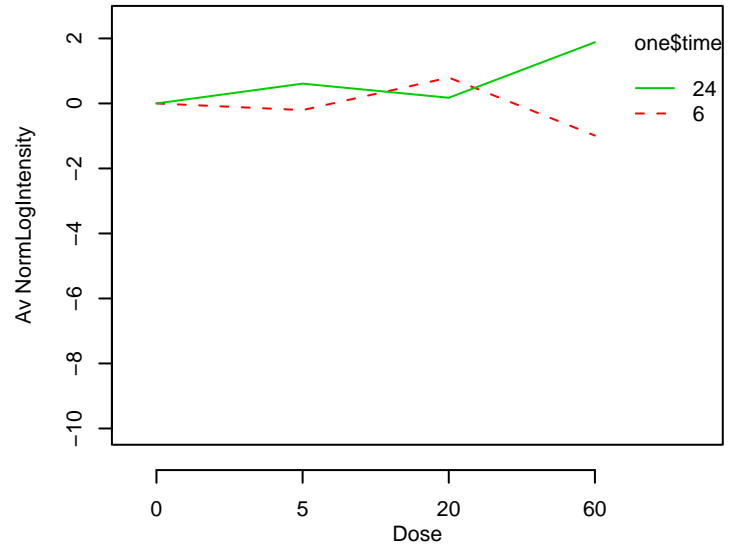

**GO\_0045859 : regulation of protein kinase activity**

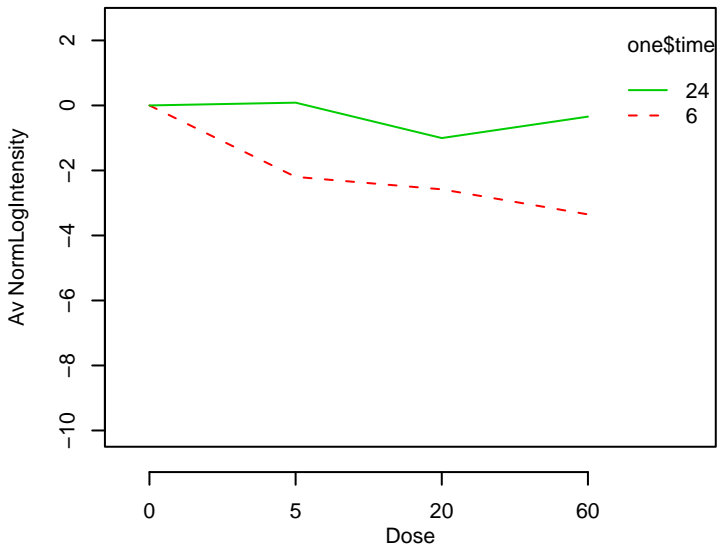

**GO\_0045860 : positive regulation of protein kinase activity**

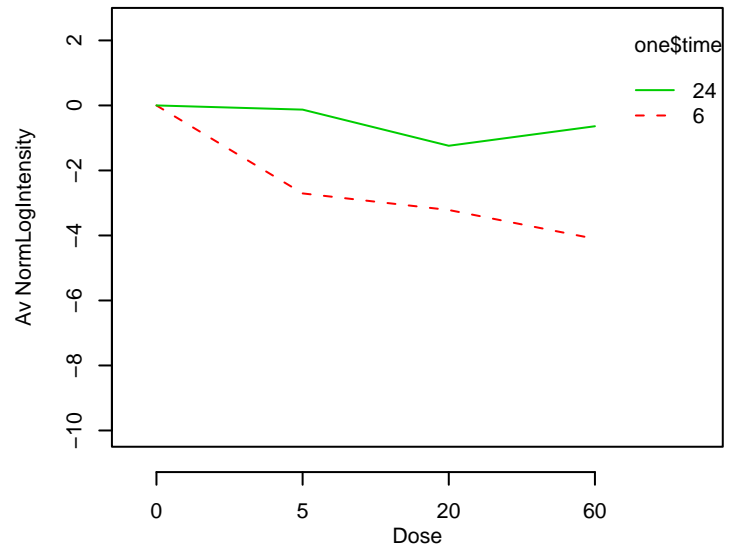

**GO\_0045861 : negative regulation of proteolysis**

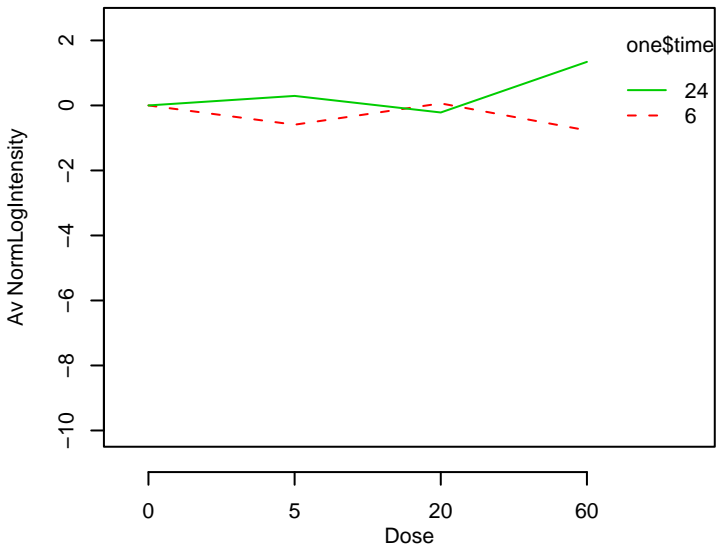

**GO\_0045862 : positive regulation of proteolysis**

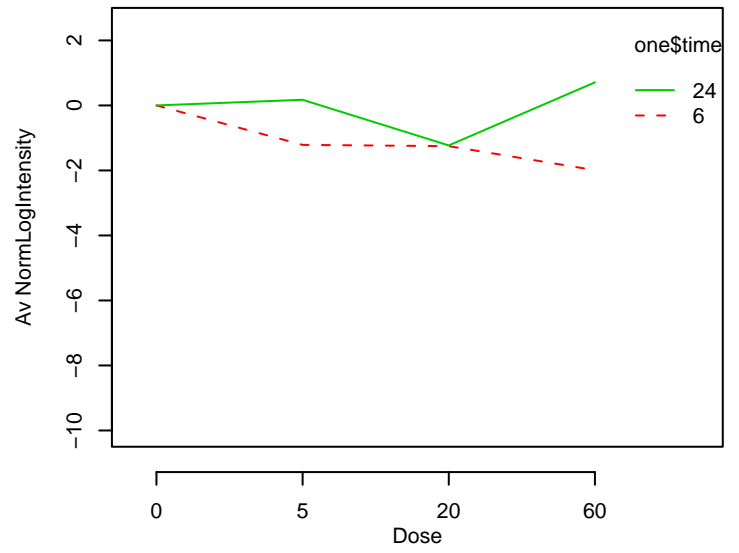

**GO\_0045884 : regulation of survival gene product activity** **GO\_0045885 : positive regulation of survival gene product a**

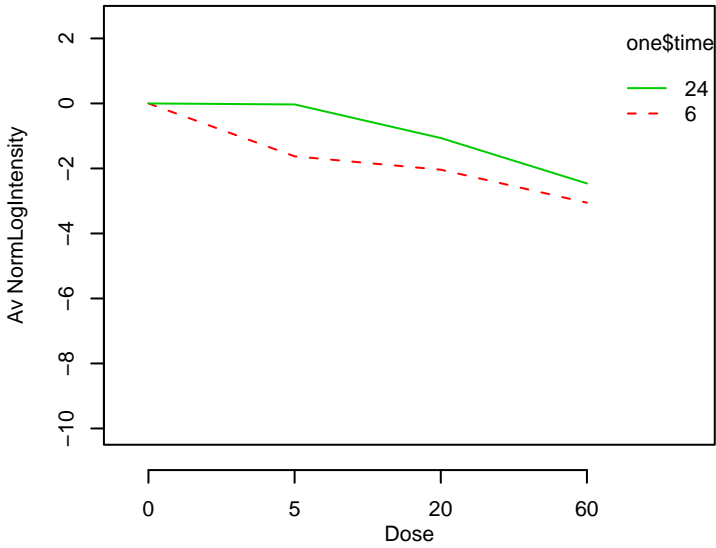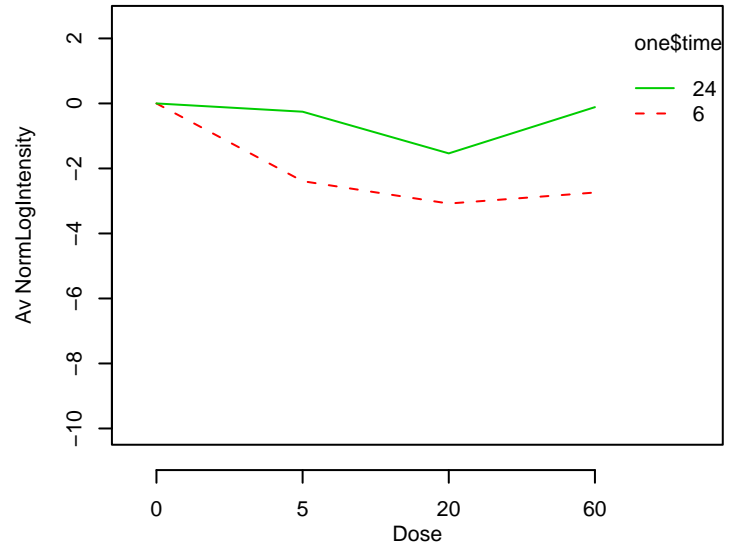

**GO\_0045892 : negative regulation of transcription, DNA-dep** **GO\_0045893 : positive regulation of transcription, DNA-dep**

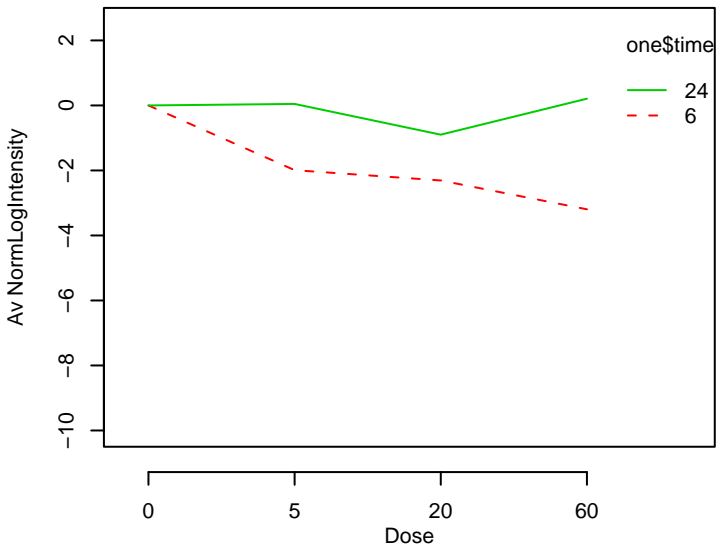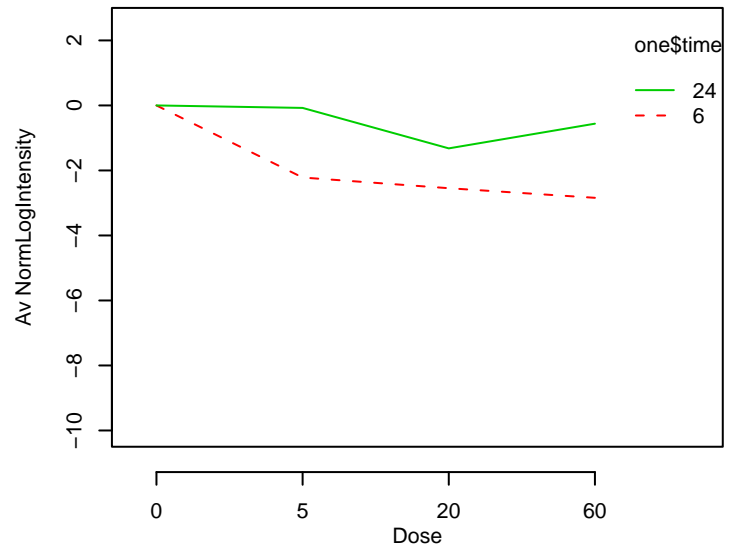

**GO\_0045913 : positive regulation of carbohydrate metaboli:**

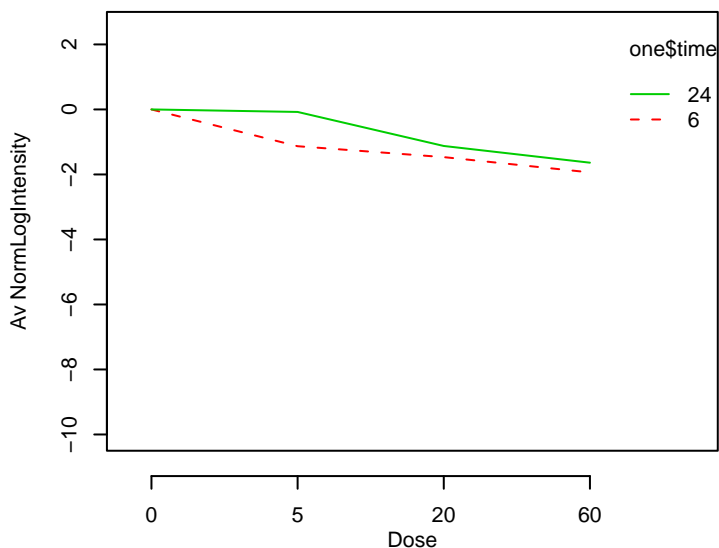

**GO\_0045923 : positive regulation of fatty acid metabolism**

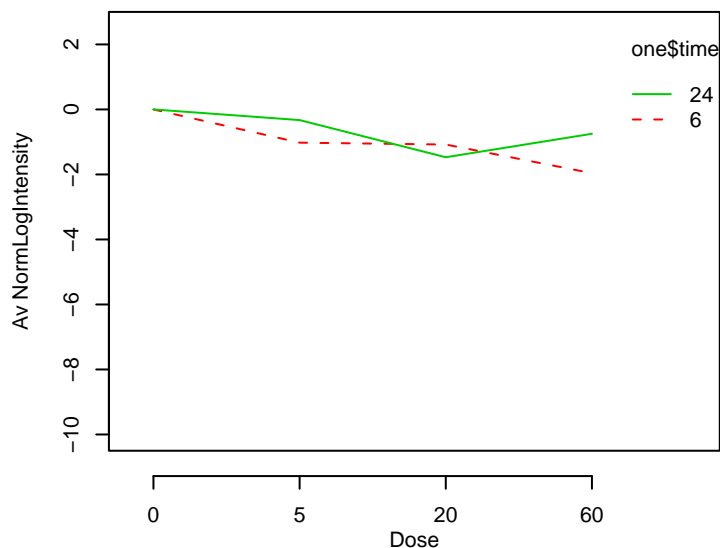

**GO\_0045926 : negative regulation of growth**

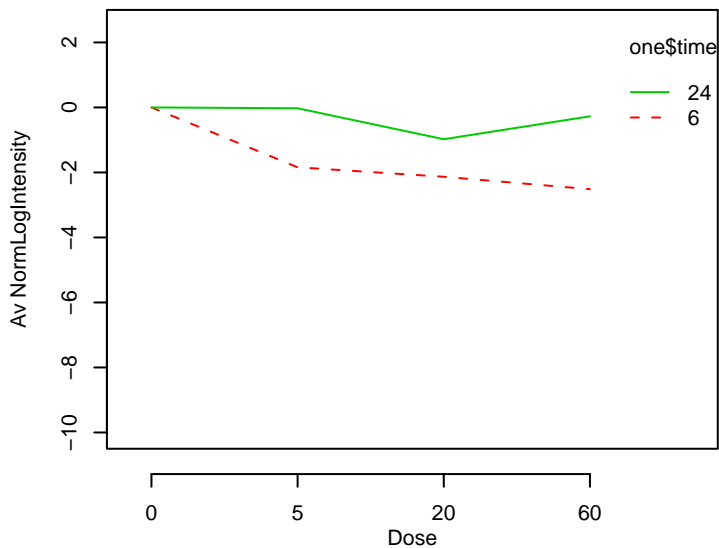

**GO\_0045927 : positive regulation of growth**

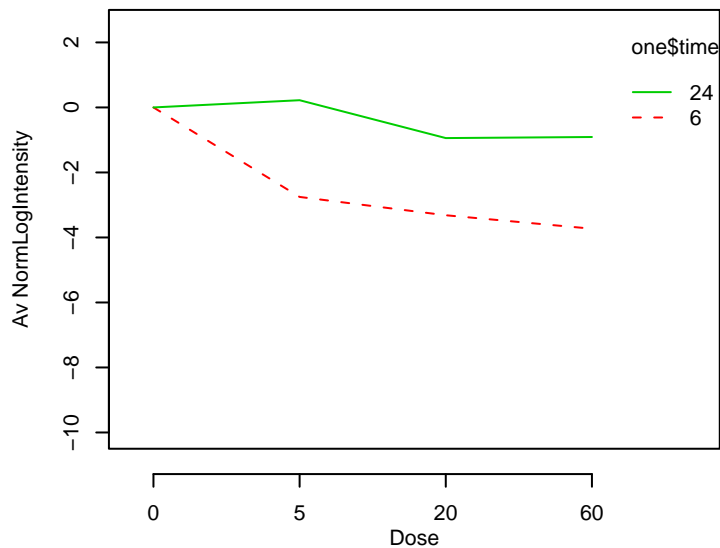

**GO\_0045930 : negative regulation of progression through mi**

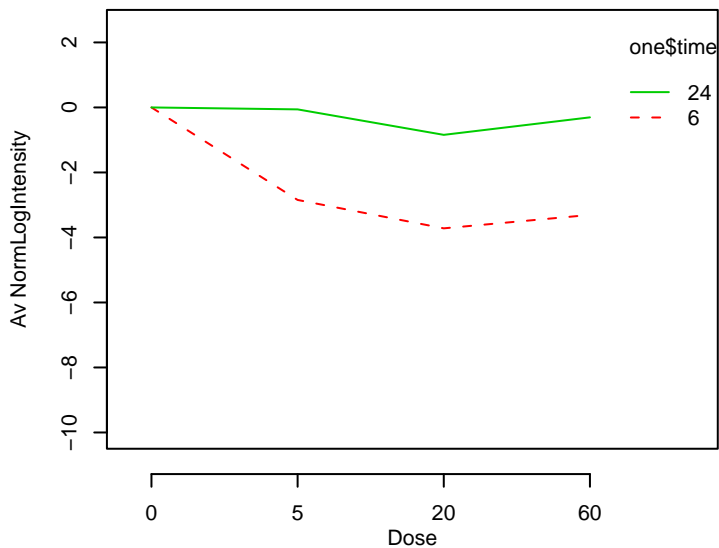

**GO\_0045931 : positive regulation of progression through mit**

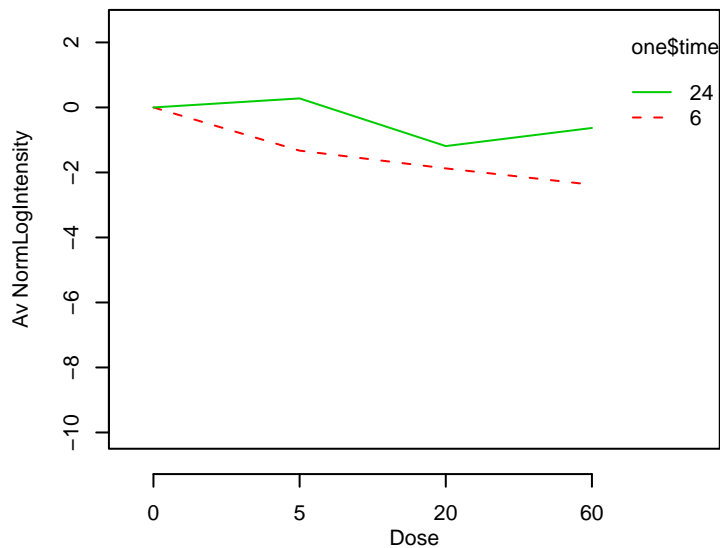

**GO\_0045933 : positive regulation of muscle contraction**

**GO\_0045936 : negative regulation of phosphate metabolism**

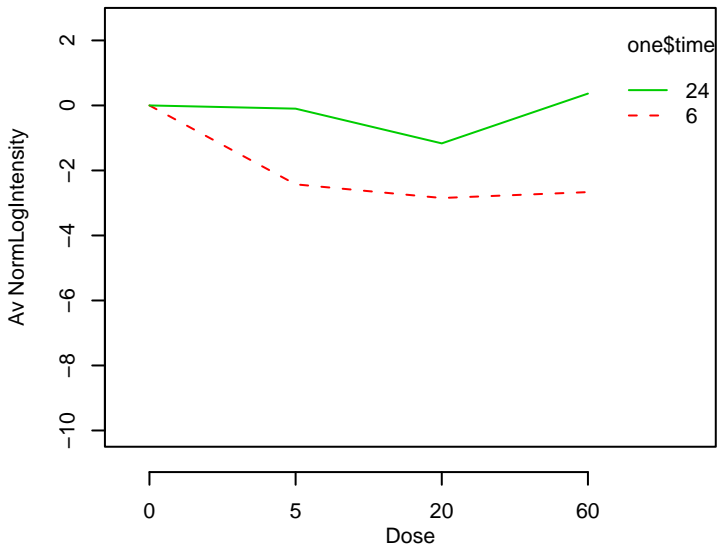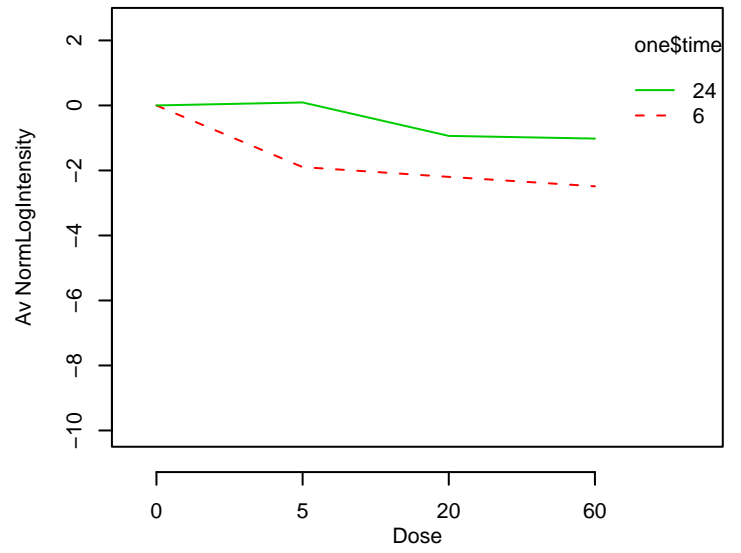

**GO\_0045937 : positive regulation of phosphate metabolism**

**GO\_0045944 : positive regulation of transcription from RNA polymerase II promoter**

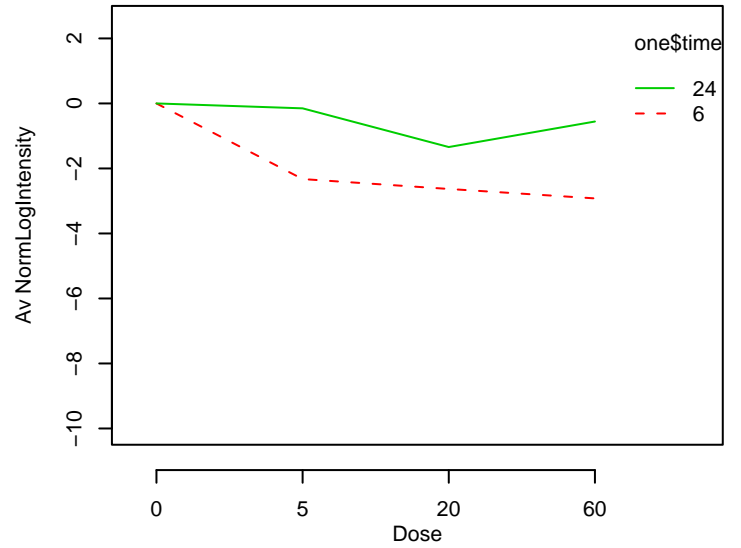

**GO\_0045946 : positive regulation of translation**

**GO\_0045947 : negative regulation of translational initiation**

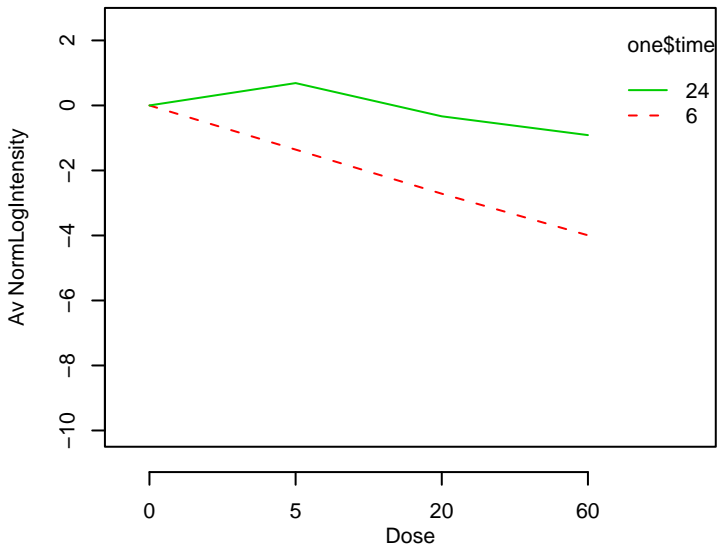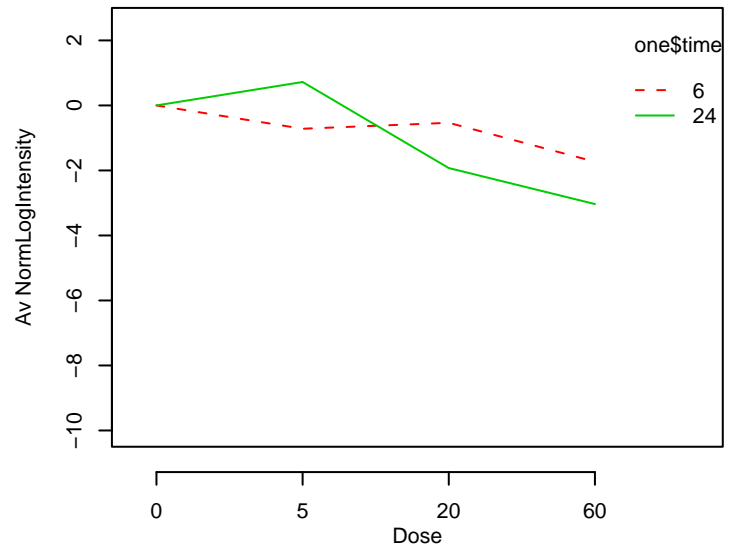

GO\_0045980 : negative regulation of nucleotide metabolism GO\_0045987 : positive regulation of smooth muscle contraction

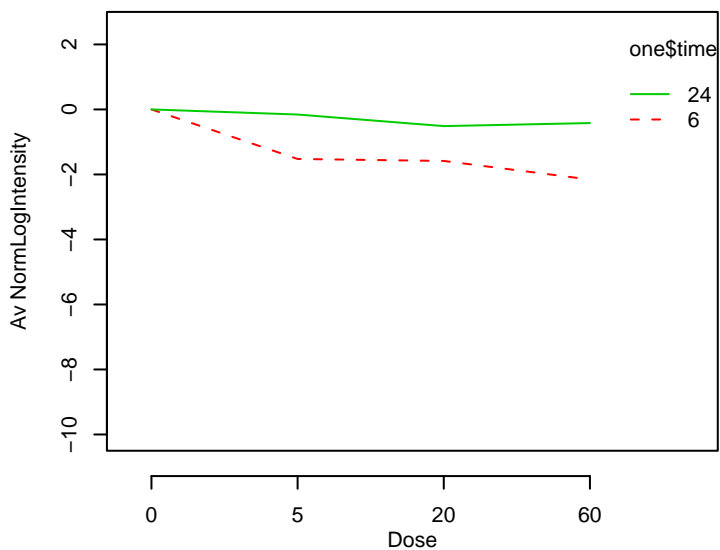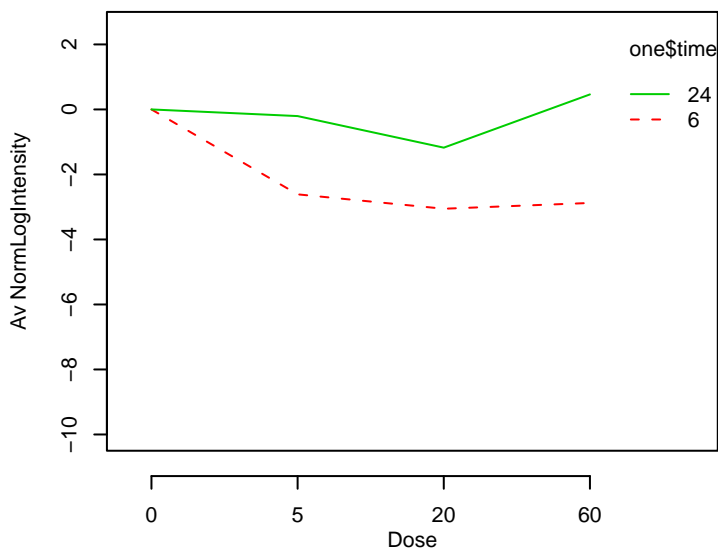

GO\_0045995 : regulation of embryonic development

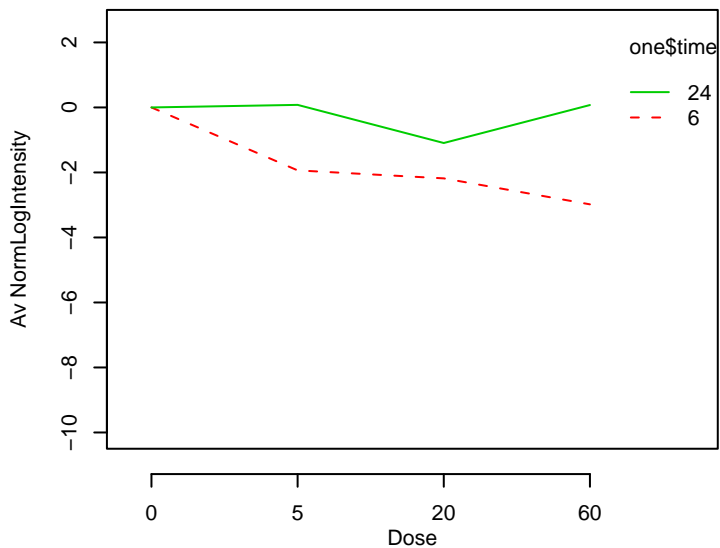

GO\_0046006 : regulation of activated T cell proliferation

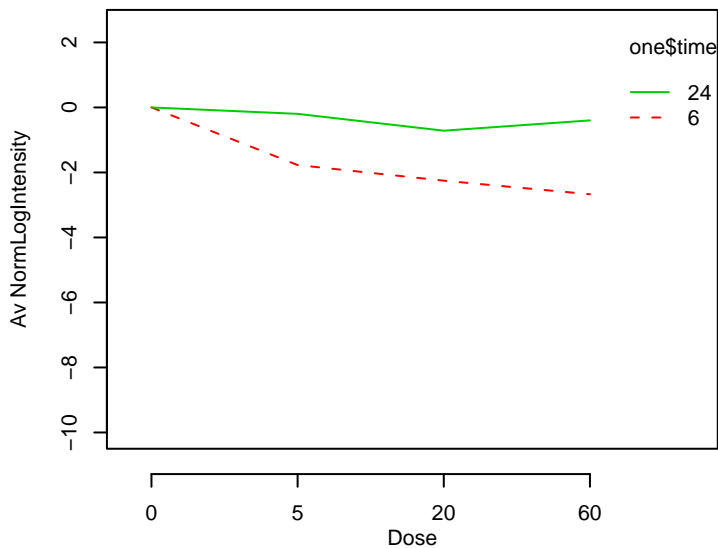

GO\_0046034 : ATP metabolism

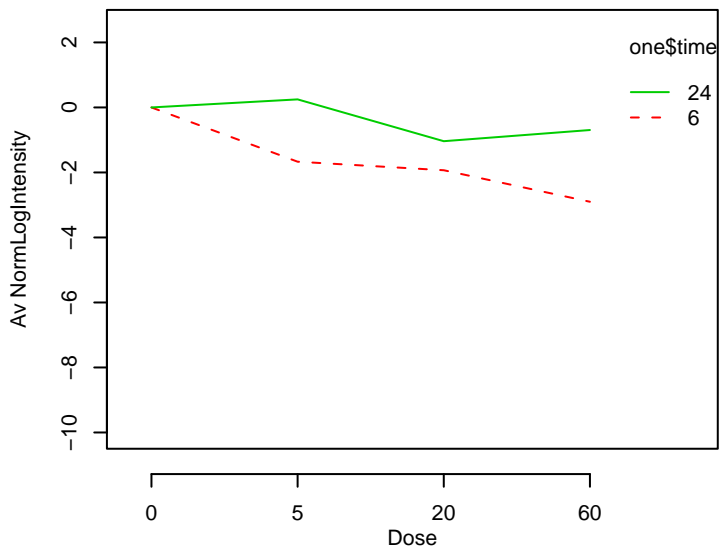

GO\_0046036 : CTP metabolism

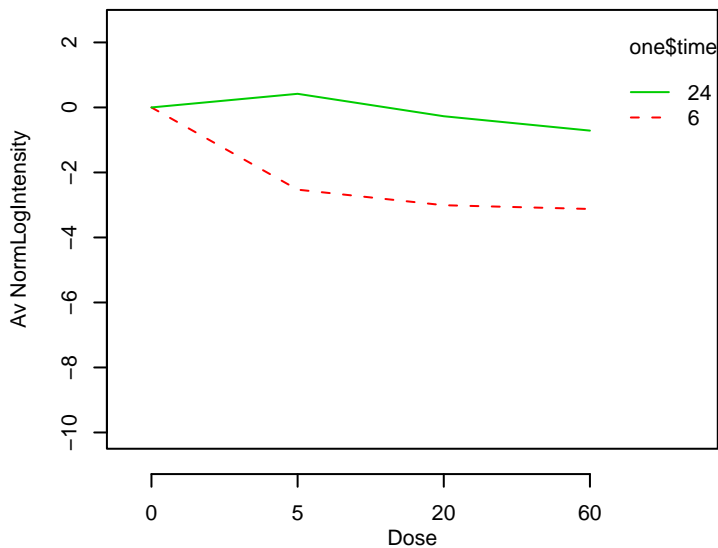

**GO\_0046039 : GTP metabolism**

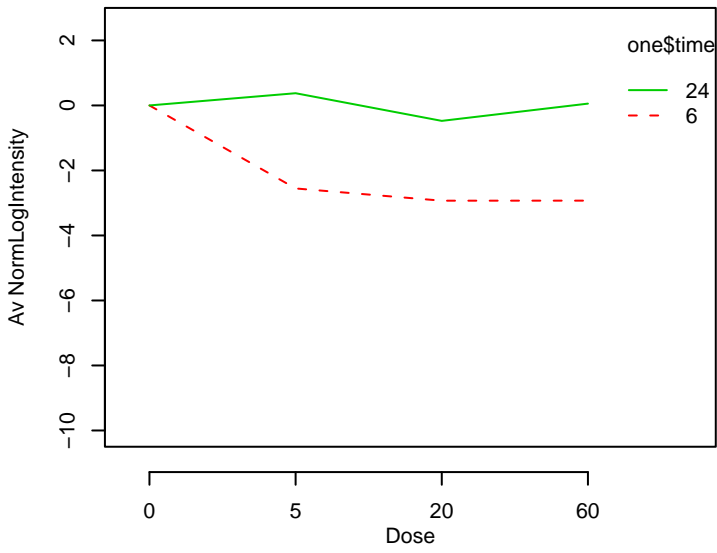

**GO\_0046051 : UTP metabolism**

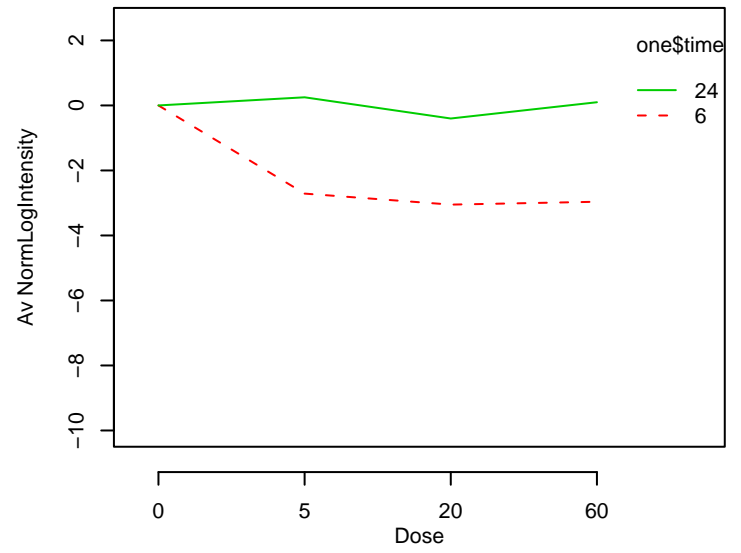

**GO\_0046058 : cAMP metabolism**

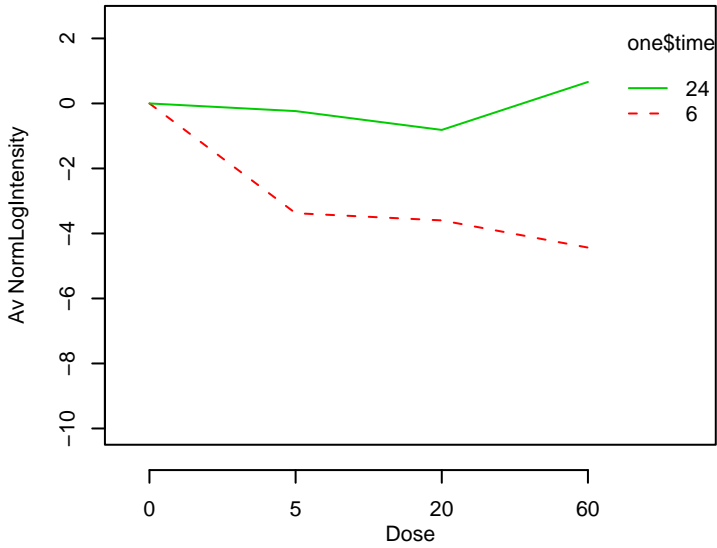

**GO\_0046068 : cGMP metabolism**

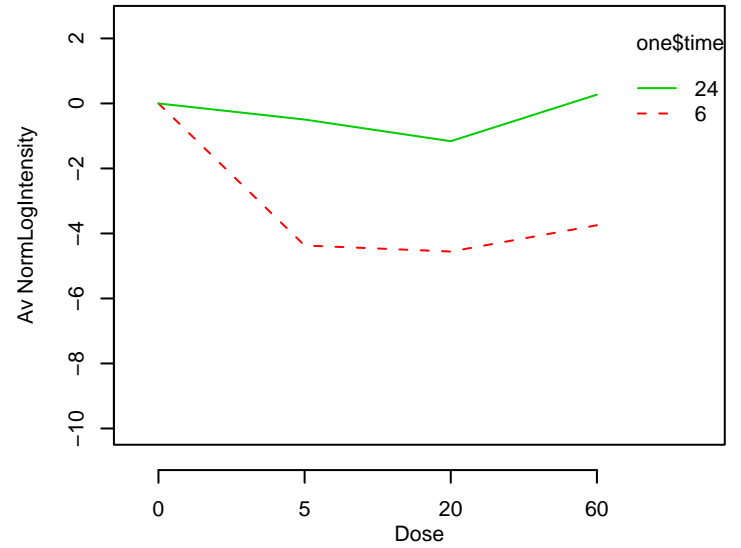

**GO\_0046112 : nucleobase biosynthesis**

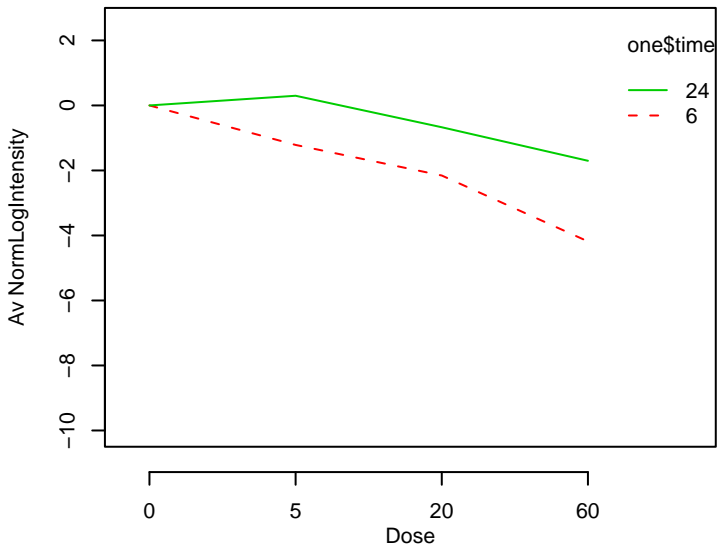

**GO\_0046125 : pyrimidine deoxyribonucleoside metabolism**

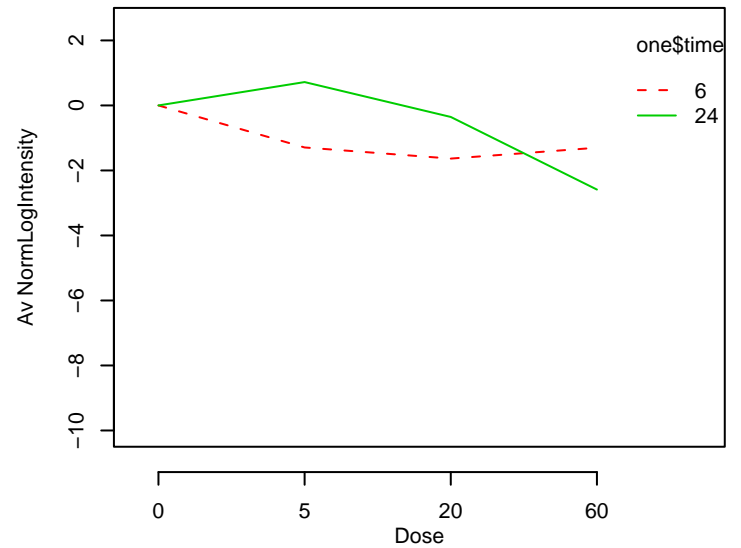



**GO\_0046128 : purine ribonucleoside metabolism**

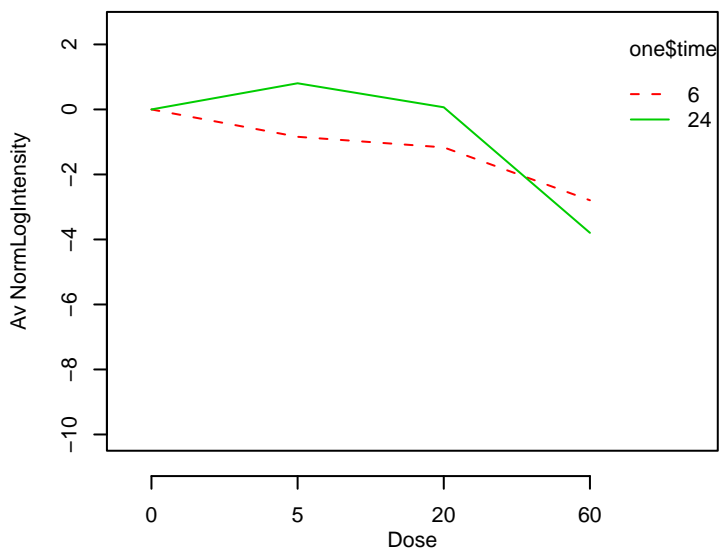

**GO\_0046146 : tetrahydrobiopterin metabolism**

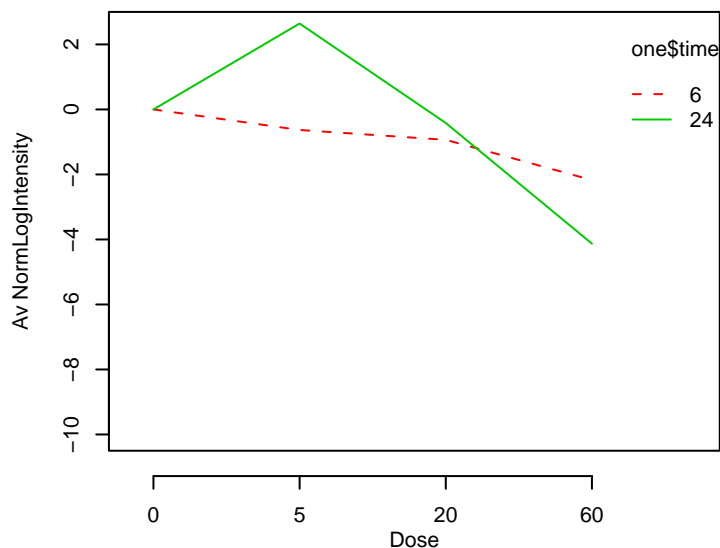

**GO\_0046148 : pigment biosynthesis**

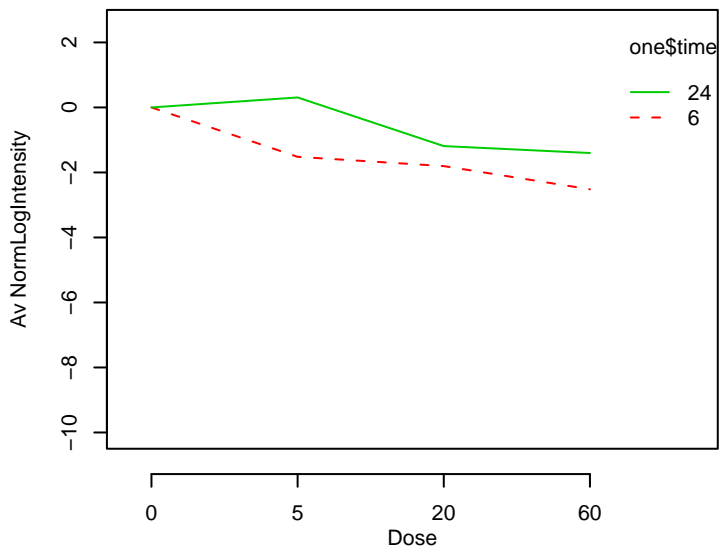

**GO\_0046164 : alcohol catabolism**

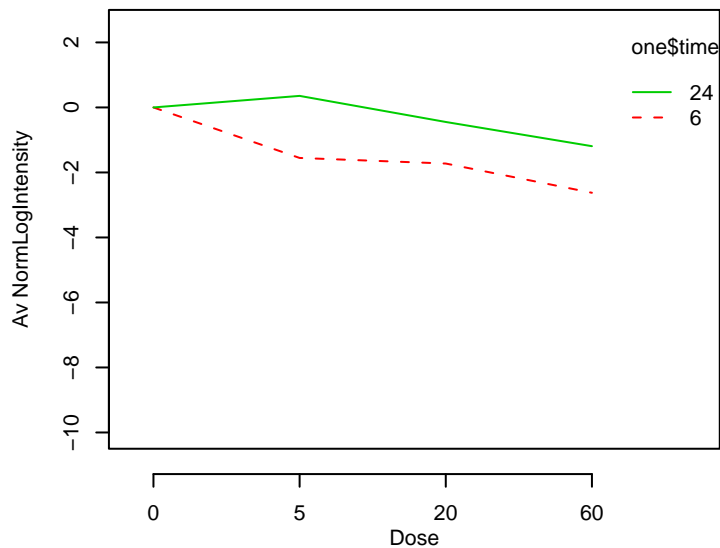

**GO\_0046165 : alcohol biosynthesis**

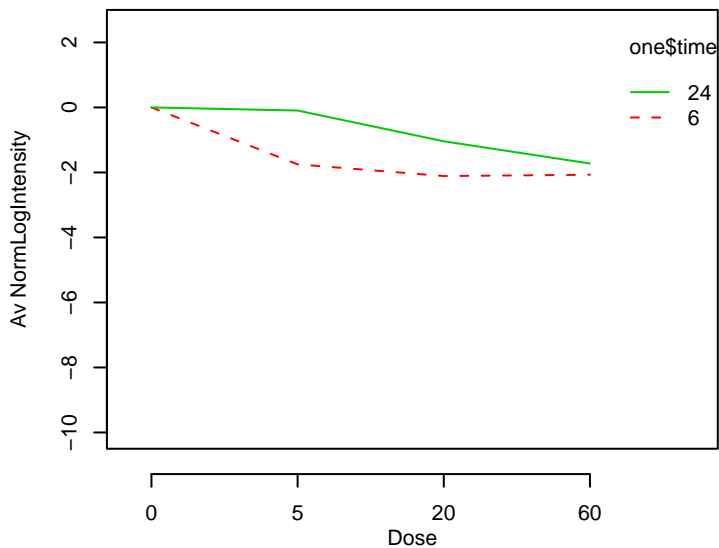

**GO\_0046209 : nitric oxide metabolism**

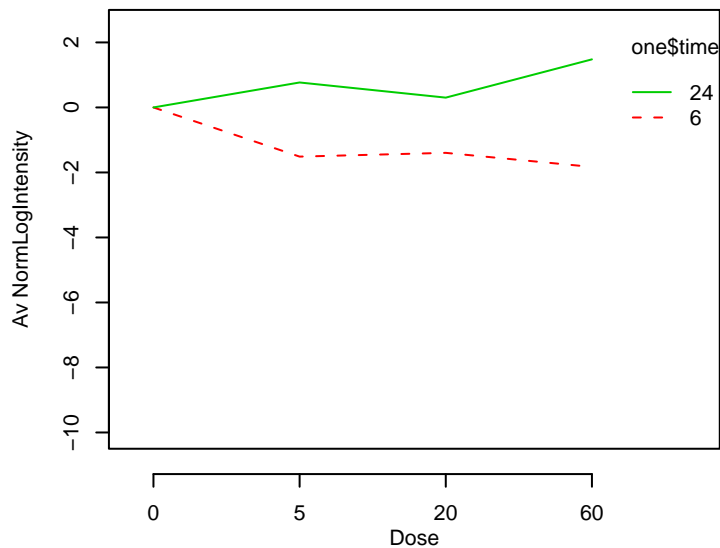

**GO\_0046323 : glucose import**

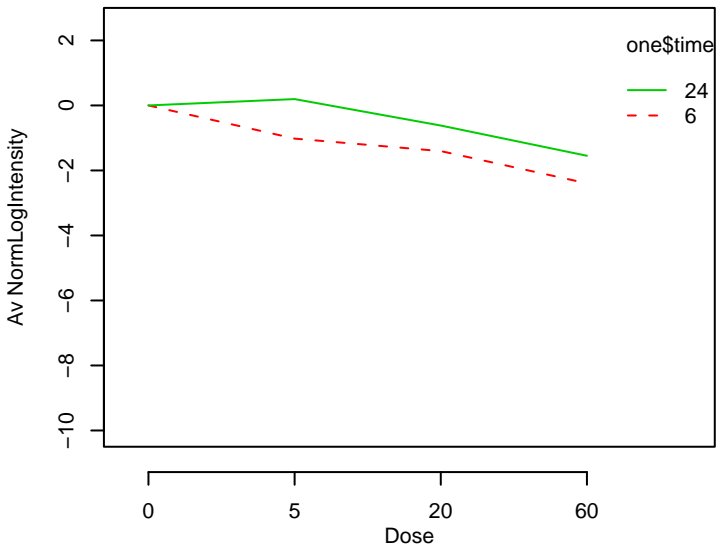

**GO\_0046324 : regulation of glucose import**

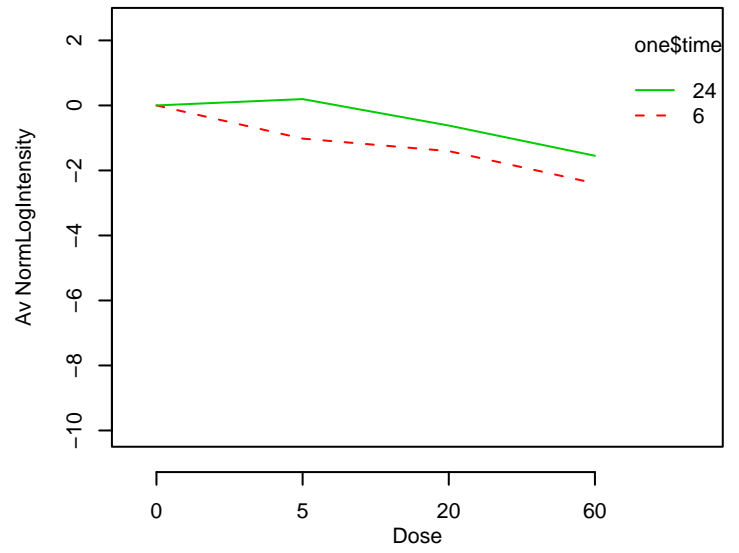

**GO\_0046328 : regulation of JNK cascade**

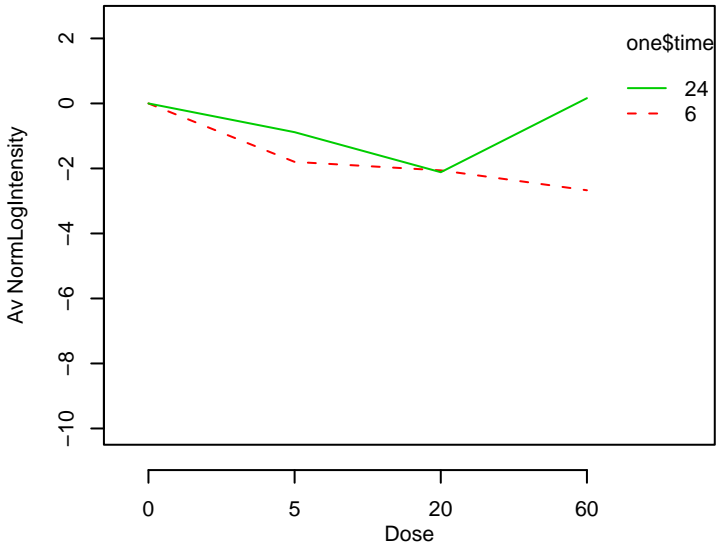

**GO\_0046330 : positive regulation of JNK cascade**

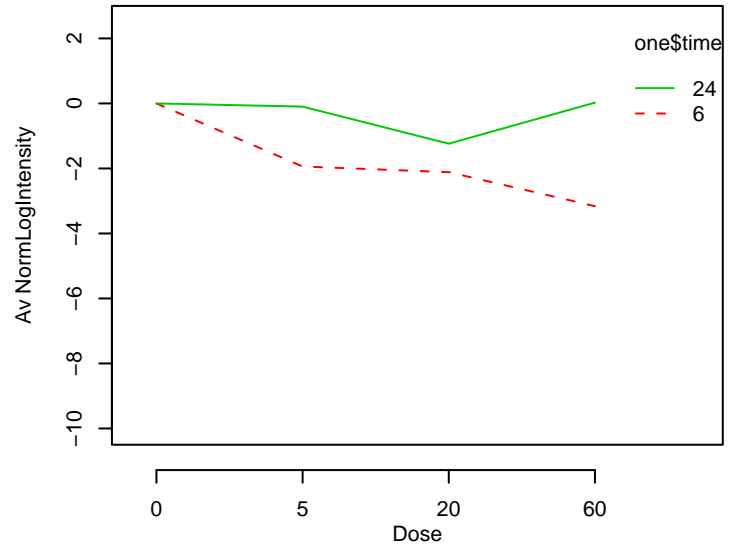

**GO\_0046339 : diacylglycerol metabolism**

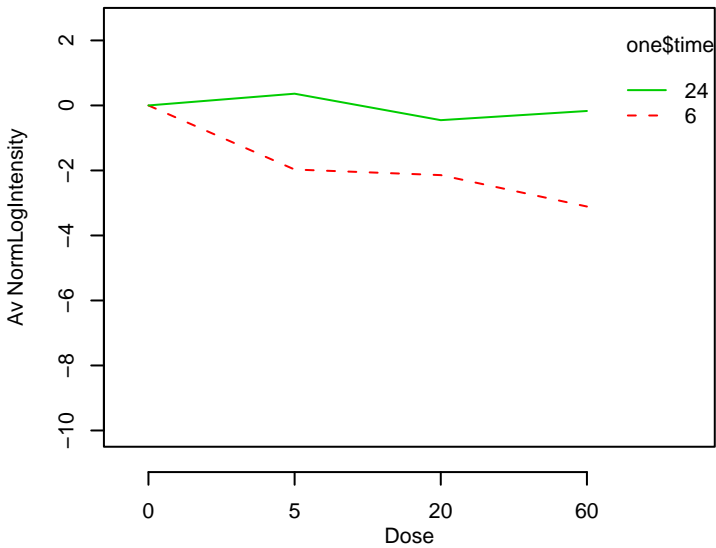

**GO\_0046348 : amino sugar catabolism**

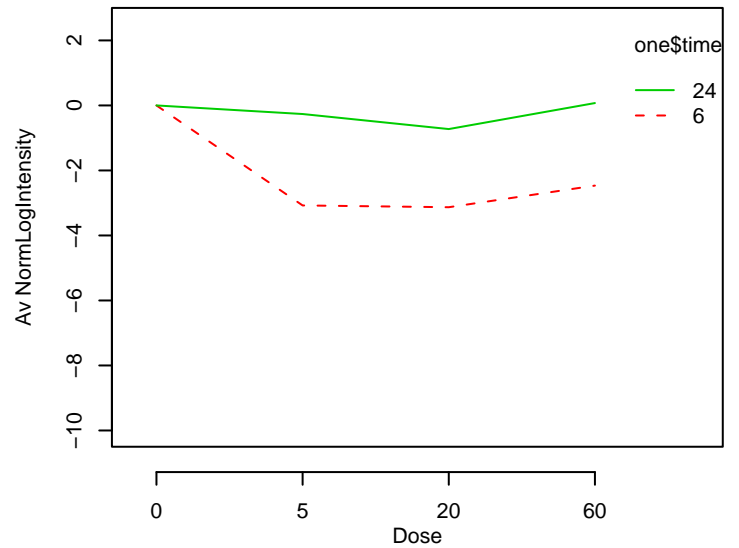

**GO\_0046356 : acetyl-CoA catabolism**

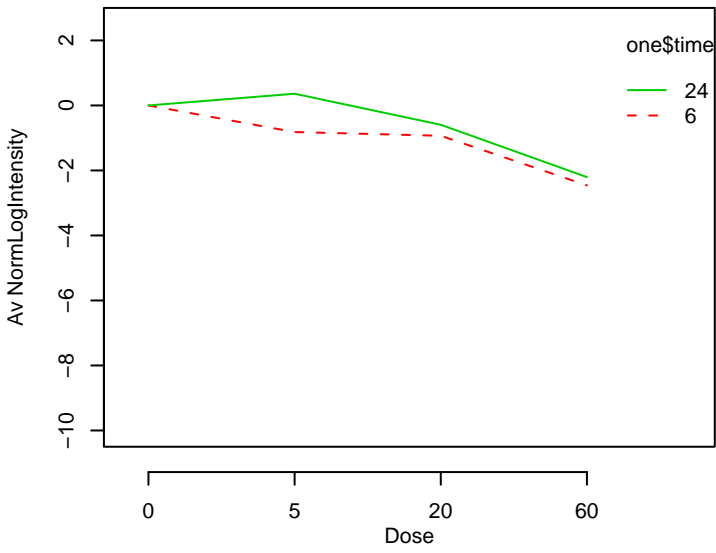

**GO\_0046364 : monosaccharide biosynthesis**

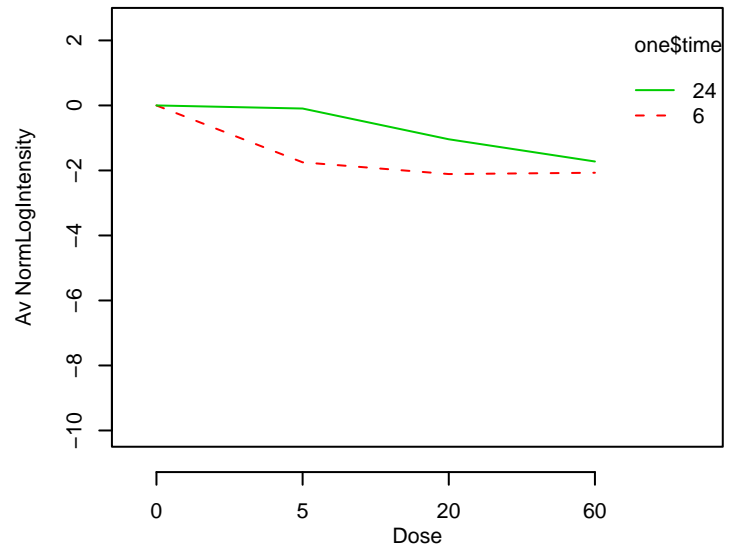

**GO\_0046365 : monosaccharide catabolism**

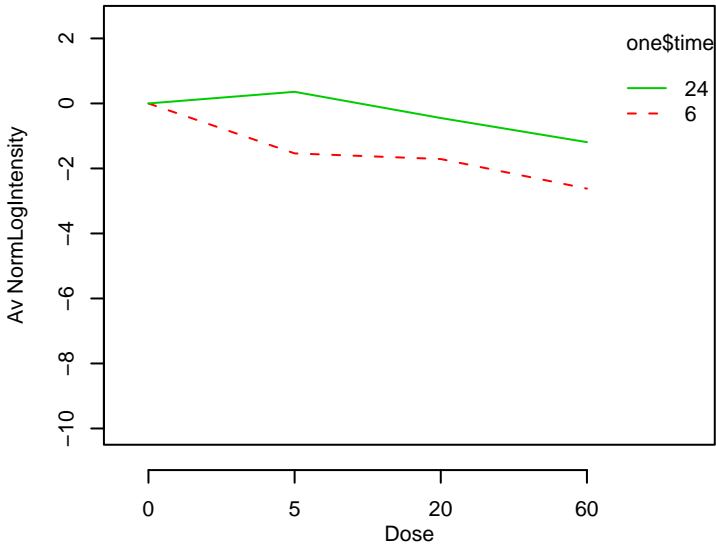

**GO\_0046394 : carboxylic acid biosynthesis**

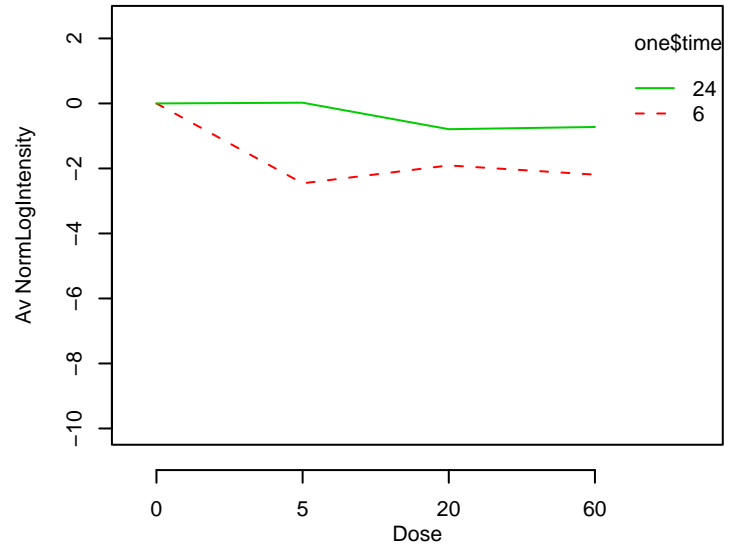

**GO\_0046395 : carboxylic acid catabolism**

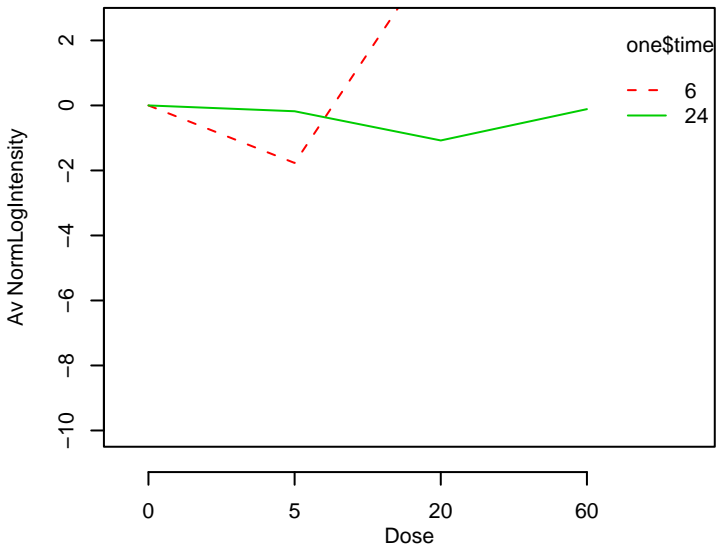

**GO\_0046425 : regulation of JAK-STAT cascade**

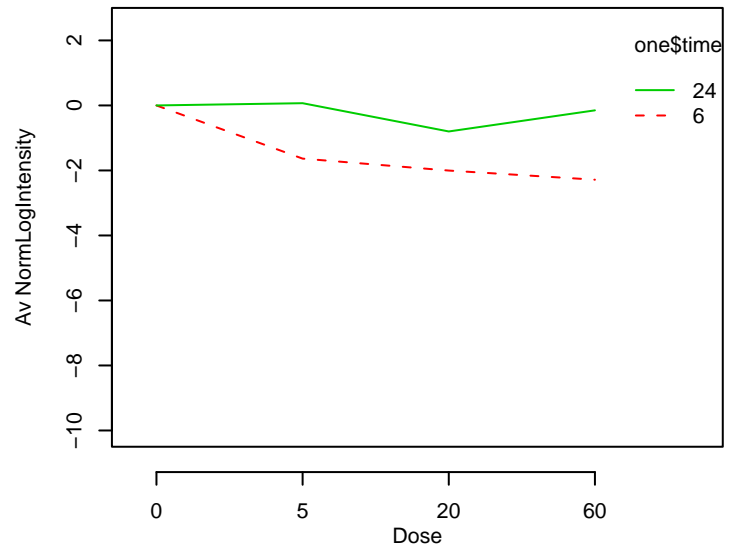

**GO\_0046427 : positive regulation of JAK-STAT cascade**

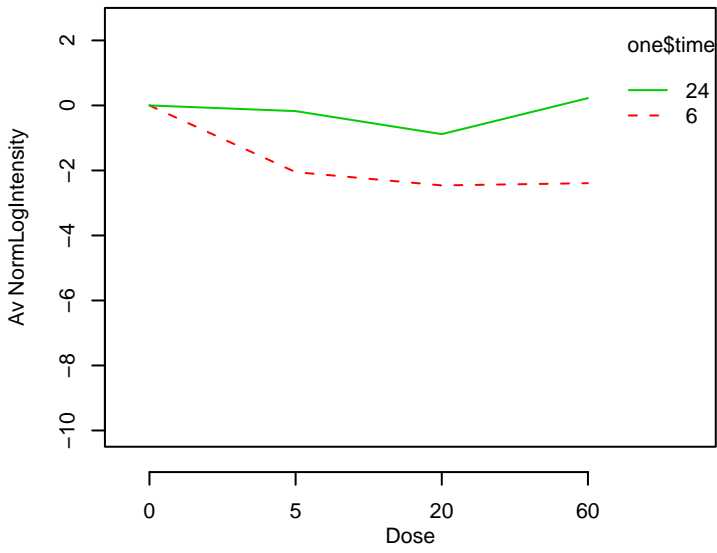

**GO\_0046456 : icosanoid biosynthesis**

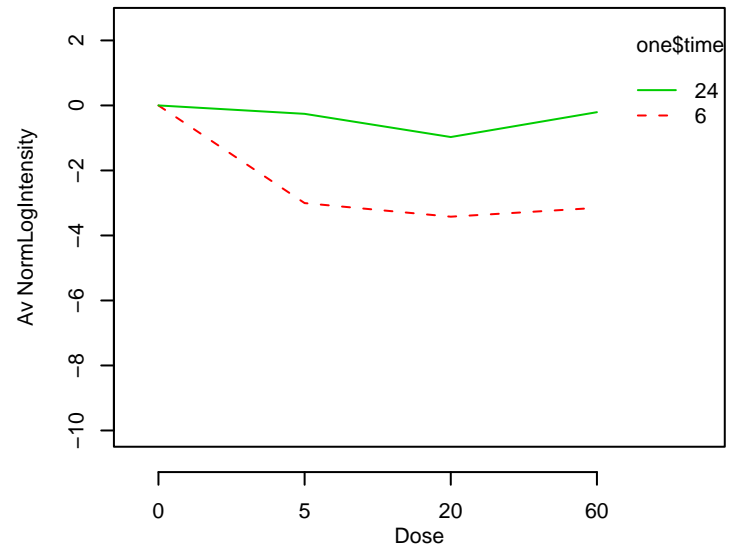

**GO\_0046457 : prostanoid biosynthesis**

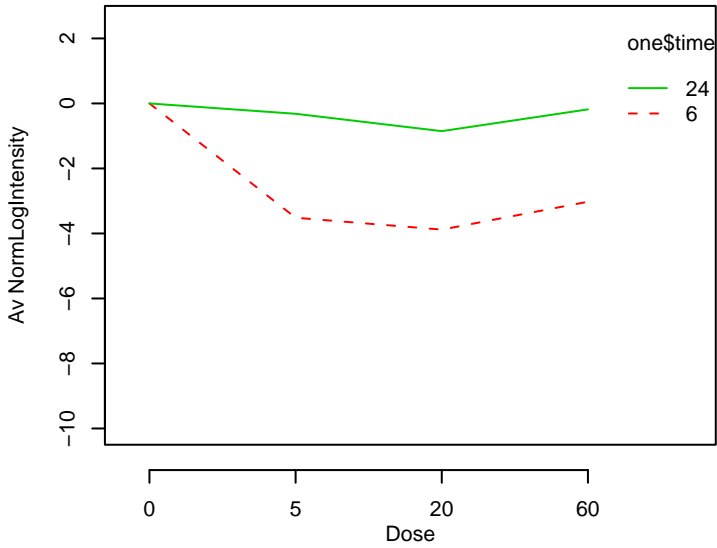

**GO\_0046460 : neutral lipid biosynthesis**

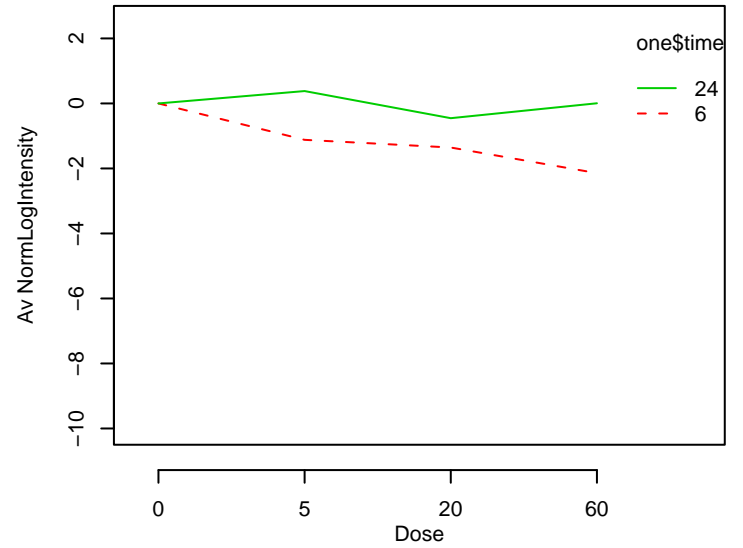

**GO\_0046463 : acylglycerol biosynthesis**

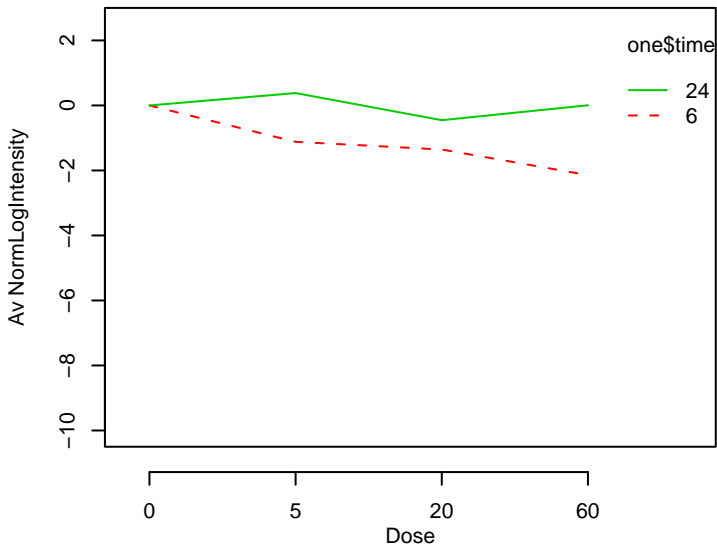

**GO\_0046466 : membrane lipid catabolism**

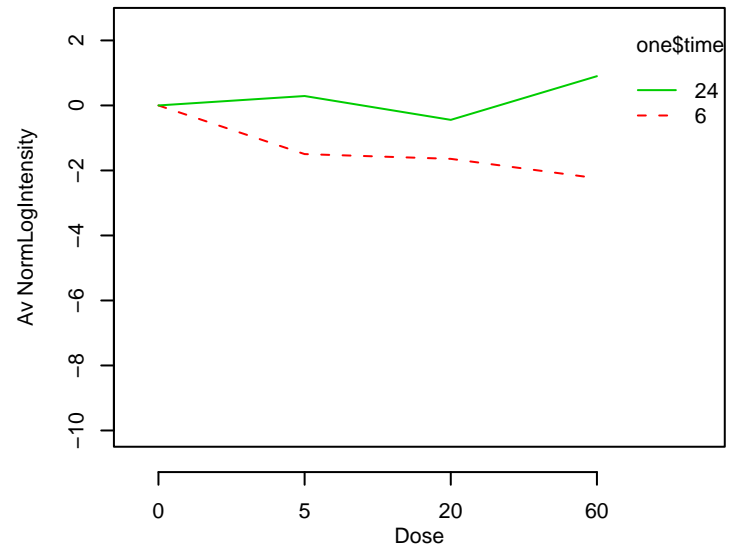

**GO\_0046467 : membrane lipid biosynthesis**

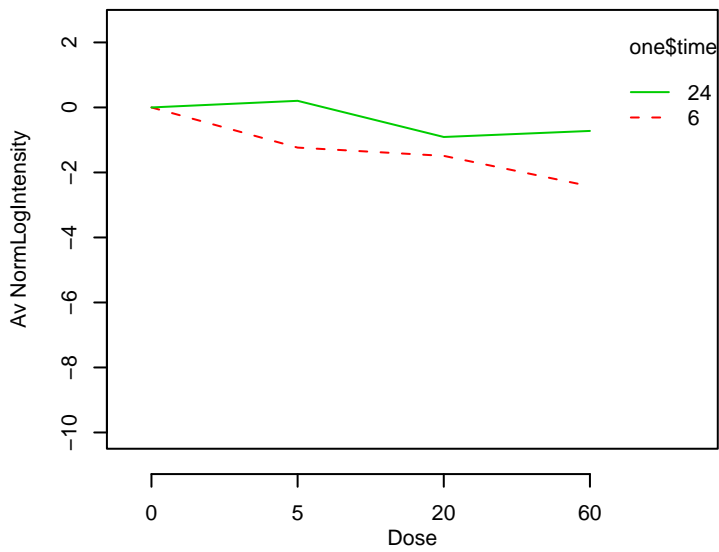

**GO\_0046470 : phosphatidylcholine metabolism**

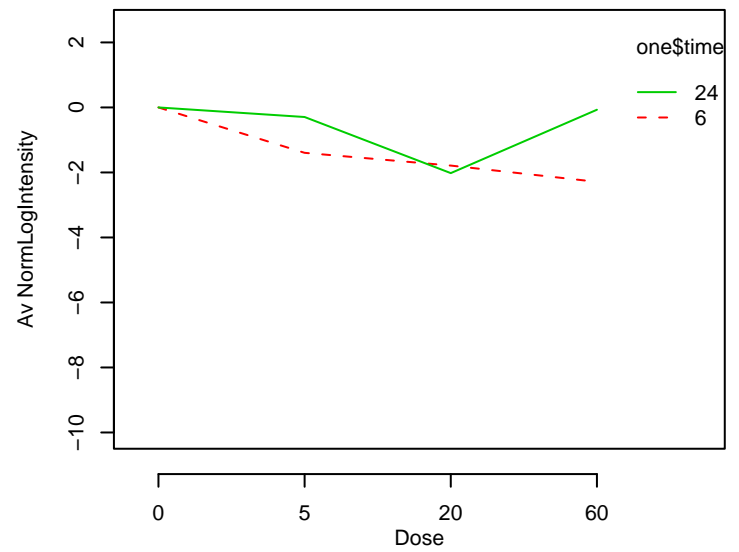

**GO\_0046474 : glycerophospholipid biosynthesis**

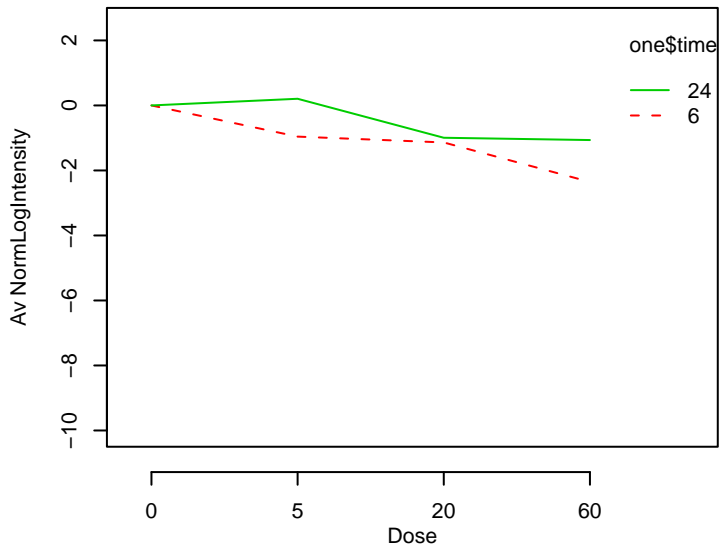

**GO\_0046479 : glycosphingolipid catabolism**

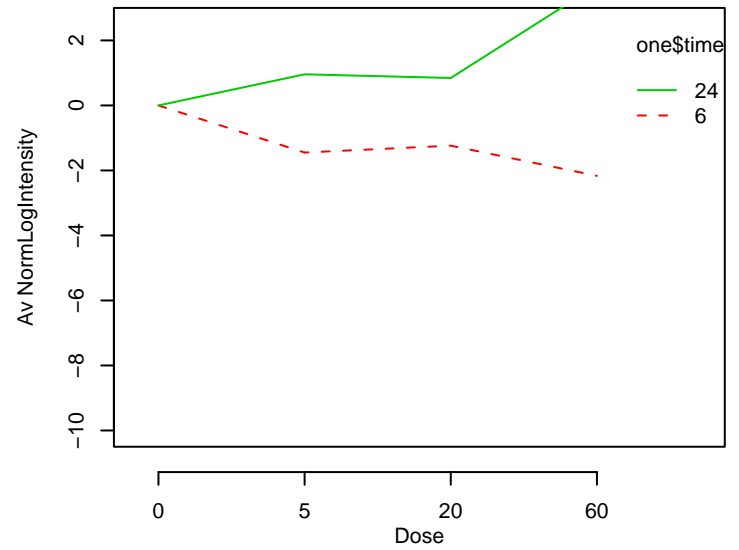

**GO\_0046483 : heterocycle metabolism**

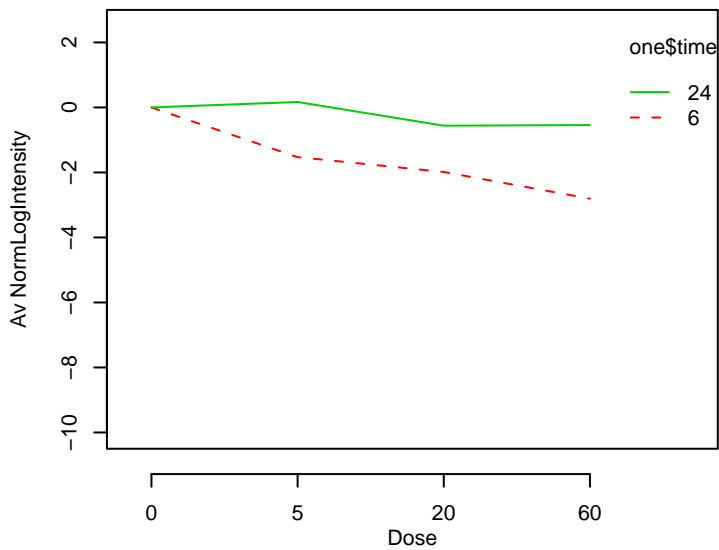

**GO\_0046486 : glycerolipid metabolism**

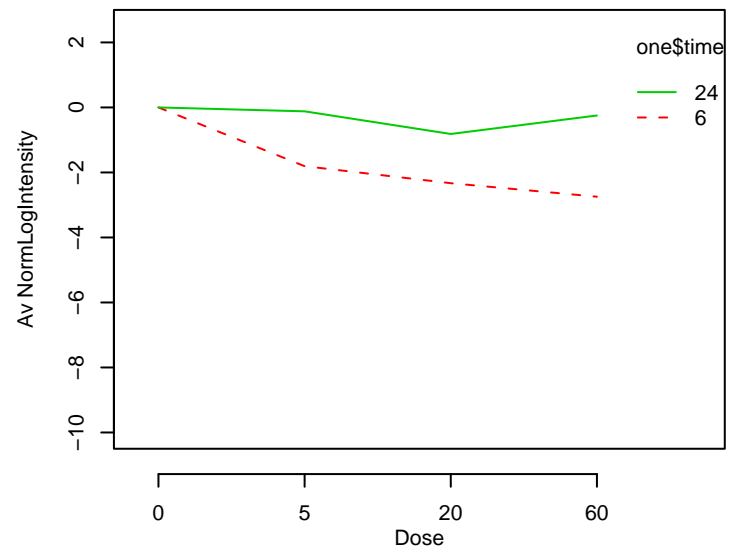

**GO\_0046488 : phosphatidylinositol metabolism**

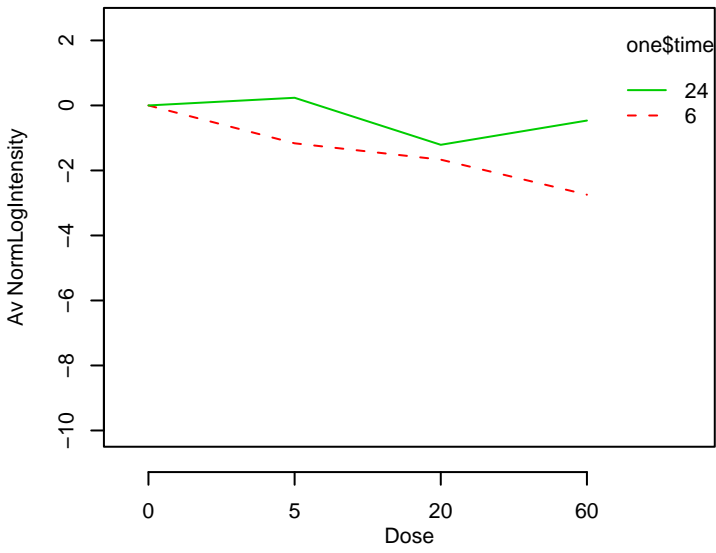

**GO\_0046489 : phosphoinositide biosynthesis**

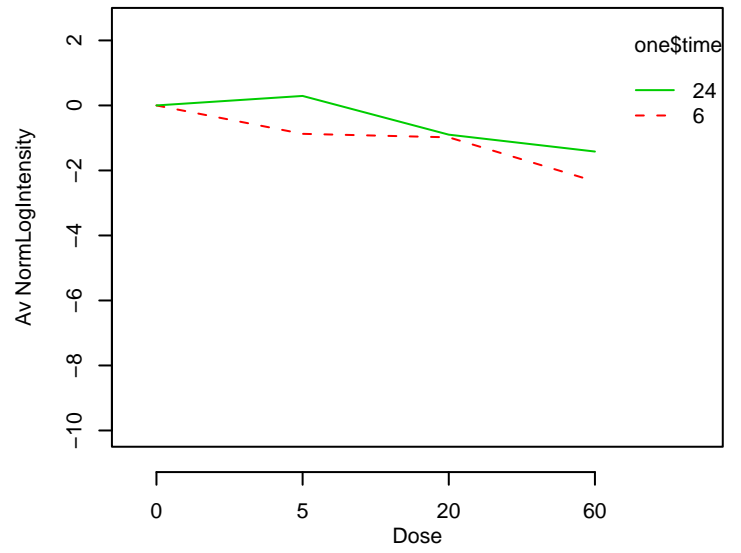

**GO\_0046504 : glycerol ether biosynthesis**

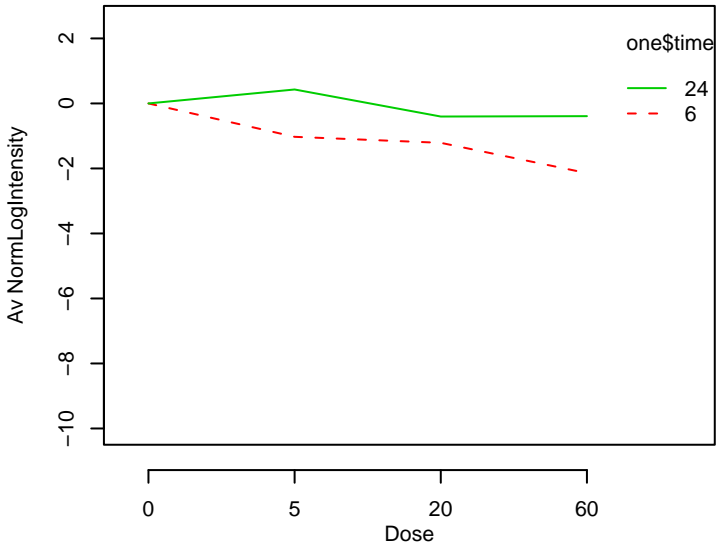

**GO\_0046513 : ceramide biosynthesis**

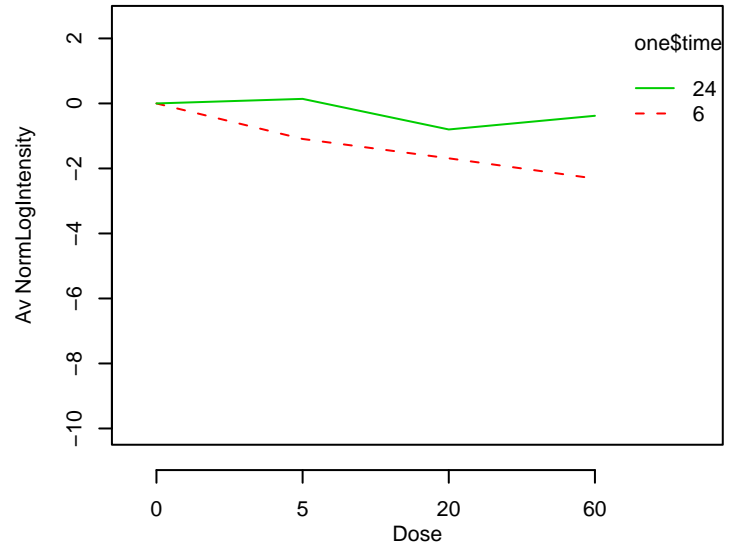

**GO\_0046519 : sphingoid metabolism**

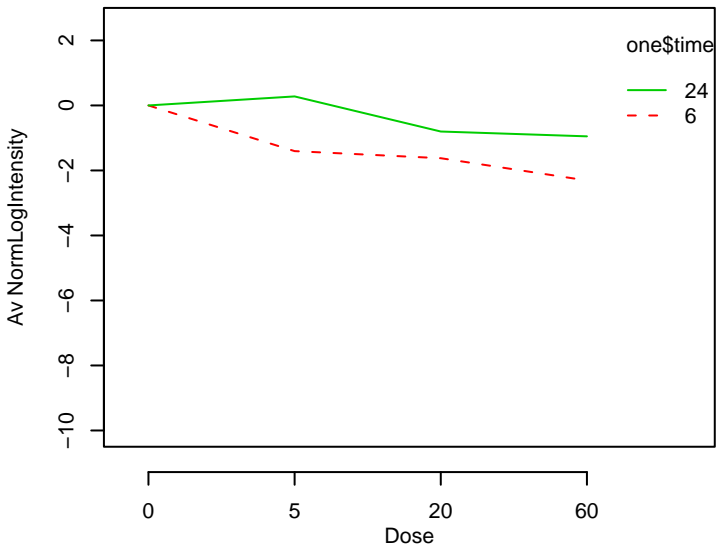

**GO\_0046520 : sphingoid biosynthesis**

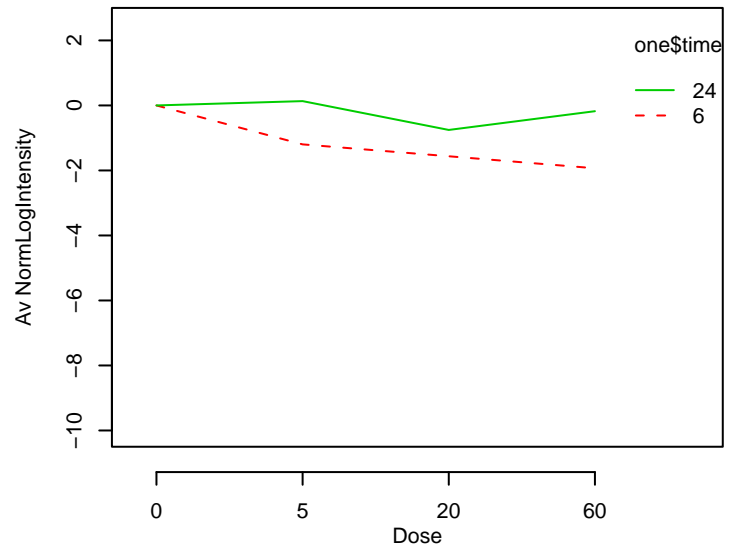

**GO\_0046530 : photoreceptor cell differentiation**

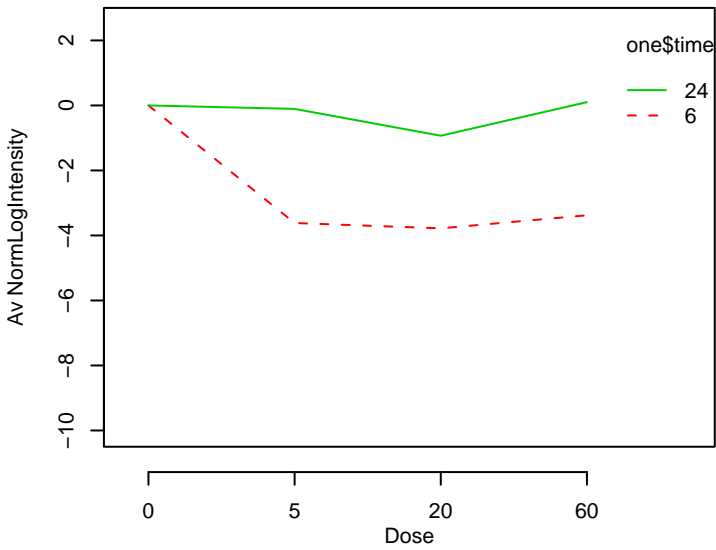

**GO\_0046545 : development of primary female sexual character**

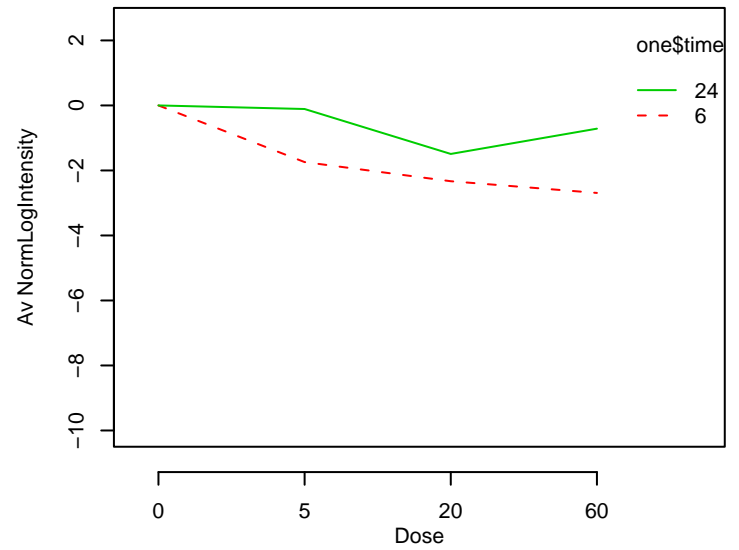

**GO\_0046546 : development of primary male sexual character**

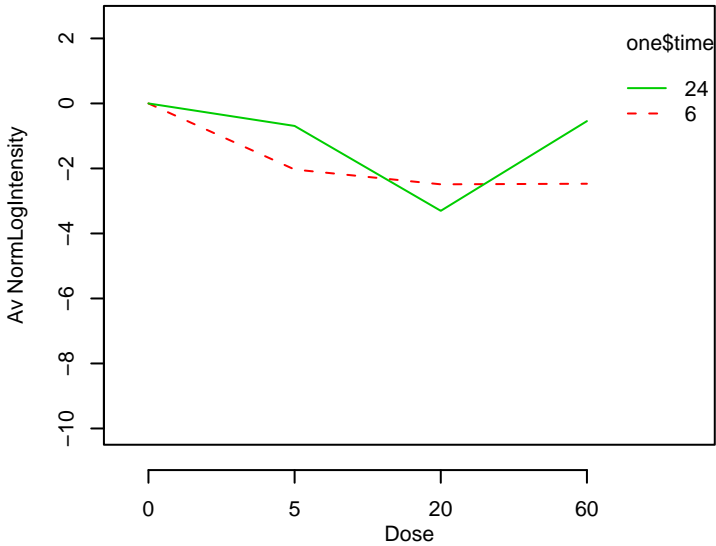

**GO\_0046578 : regulation of Ras protein signal transduction**

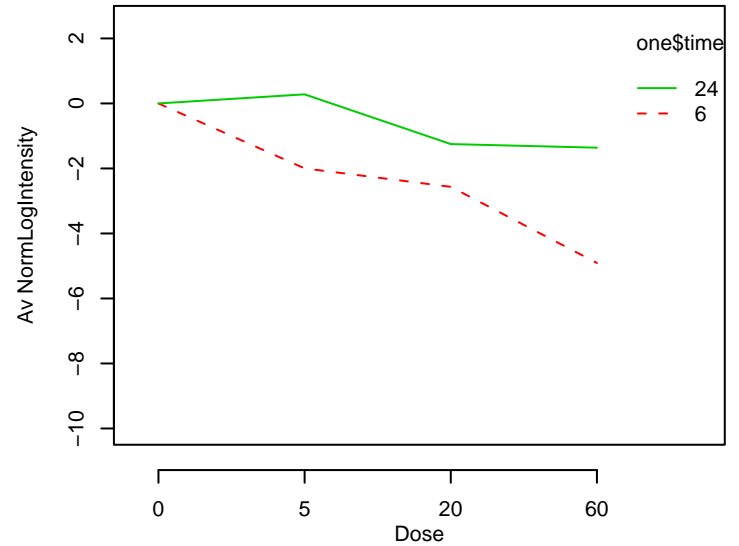

**GO\_0046626 : regulation of insulin receptor signaling pathway**

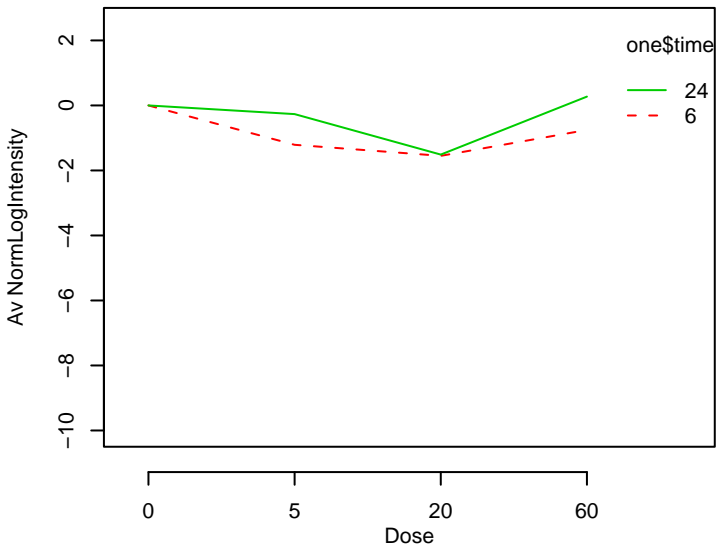

**GO\_0046631 : alpha-beta T cell activation**

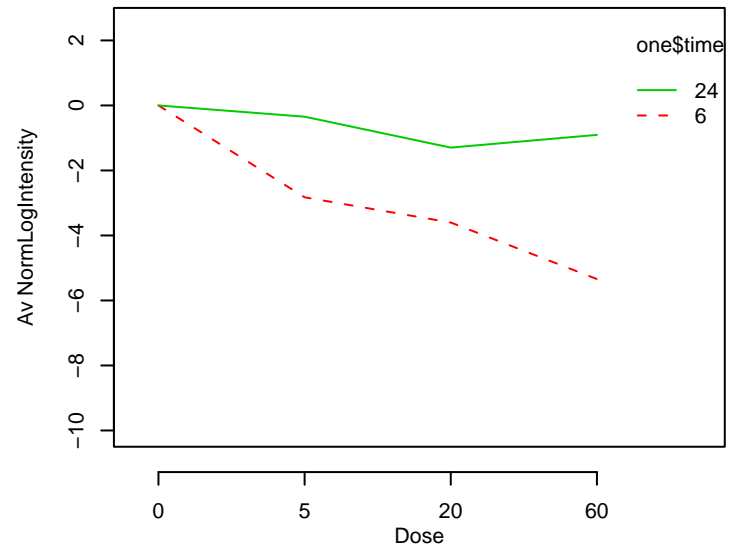

**GO\_0046649 : lymphocyte activation**

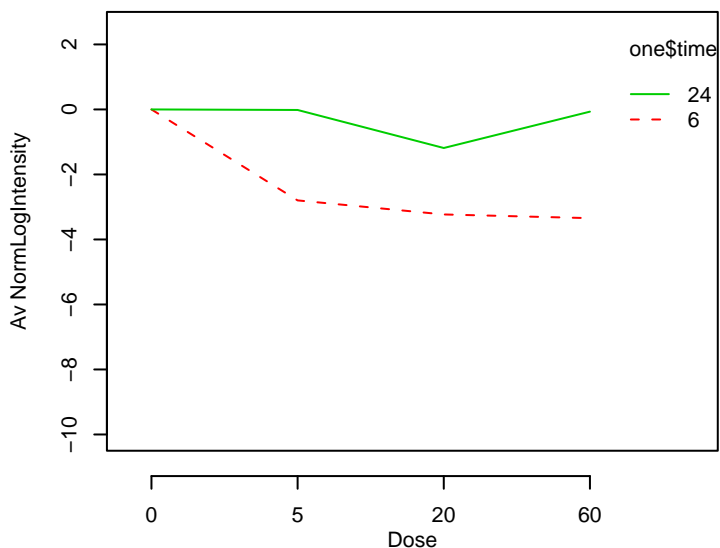

**GO\_0046651 : lymphocyte proliferation**

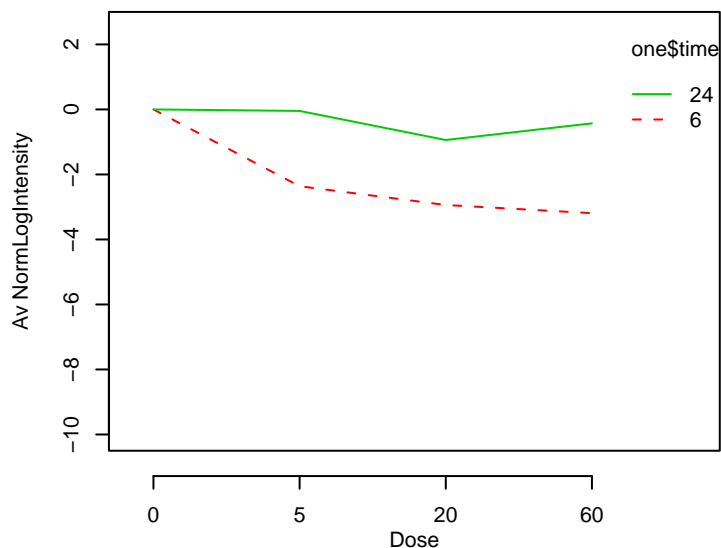

**GO\_0046660 : female sex differentiation**

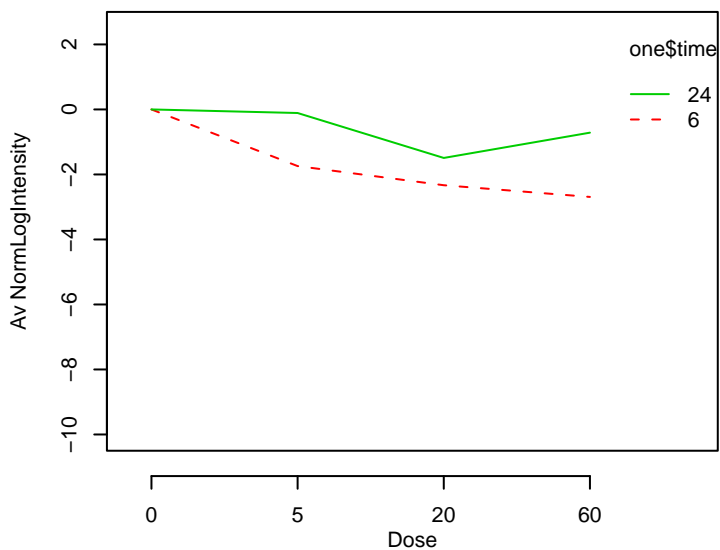

**GO\_0046661 : male sex differentiation**

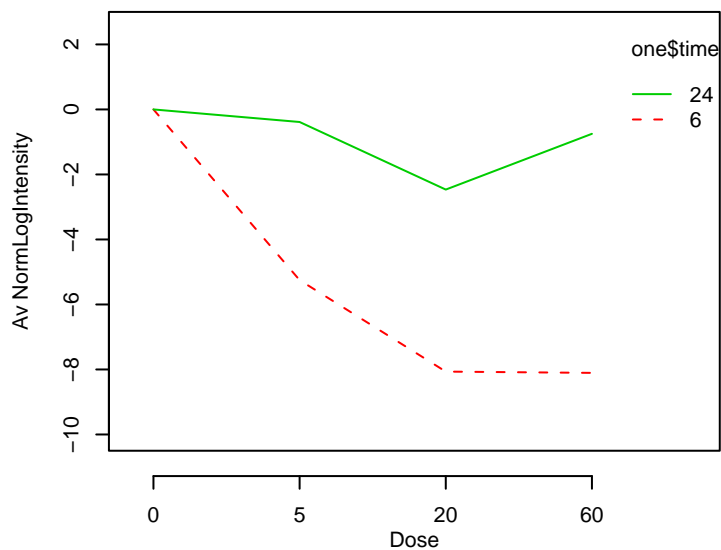

**GO\_0046666 : retinal cell programmed cell death**

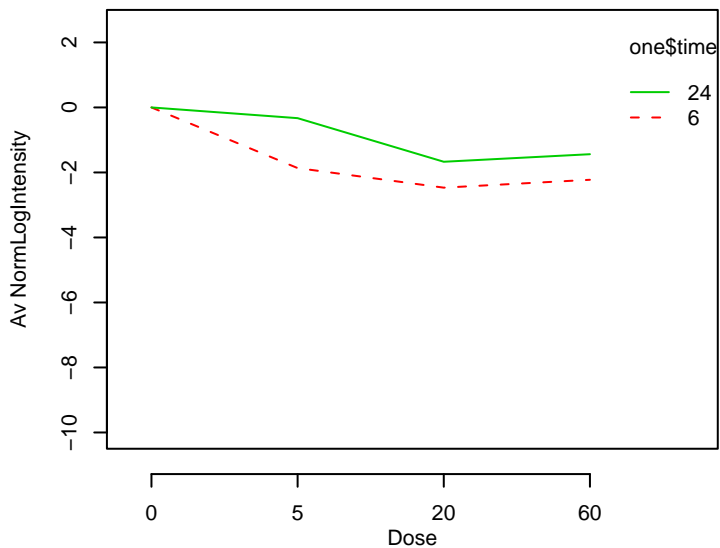

**GO\_0046716 : muscle maintenance**

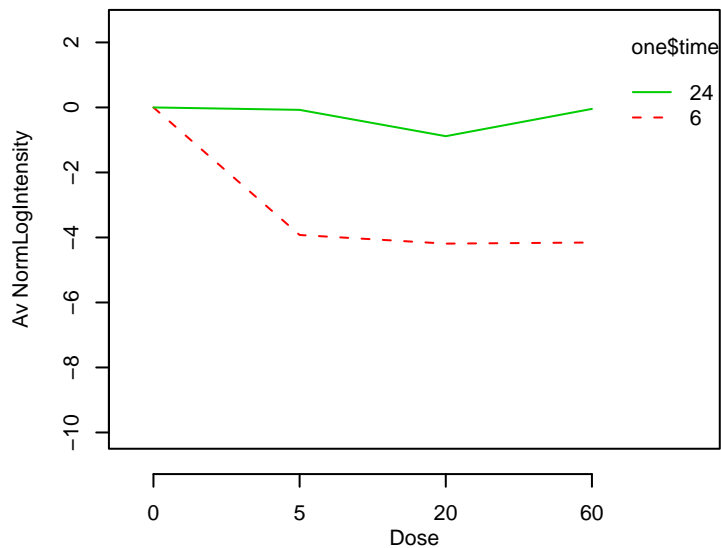



**GO\_0046718 : entry of virus into host cell**

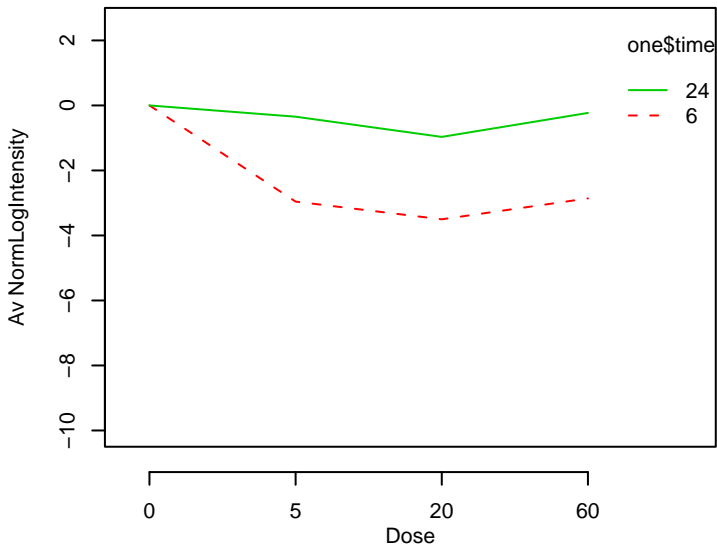

**GO\_0046777 : protein amino acid autophosphorylation**

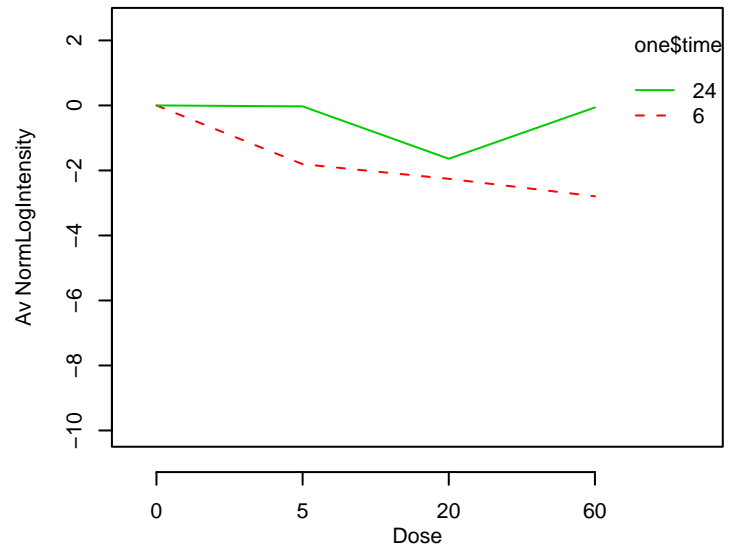

**GO\_0046822 : regulation of nucleocytoplasmic transport** **GO\_0046823 : negative regulation of nucleocytoplasmic trans**

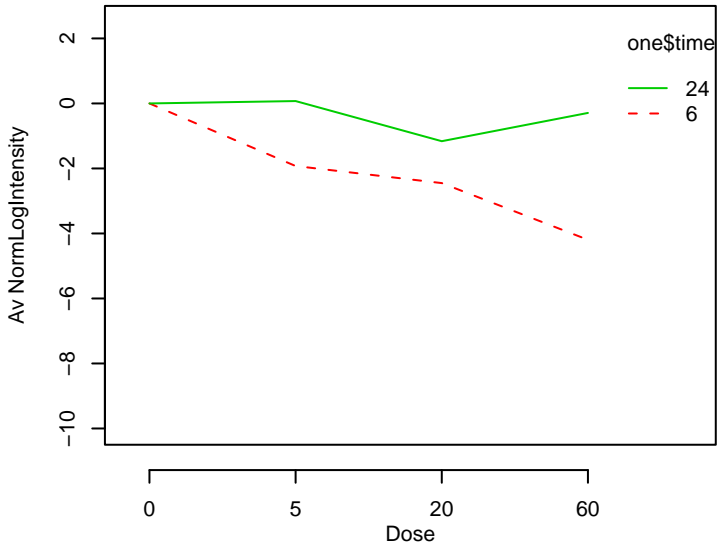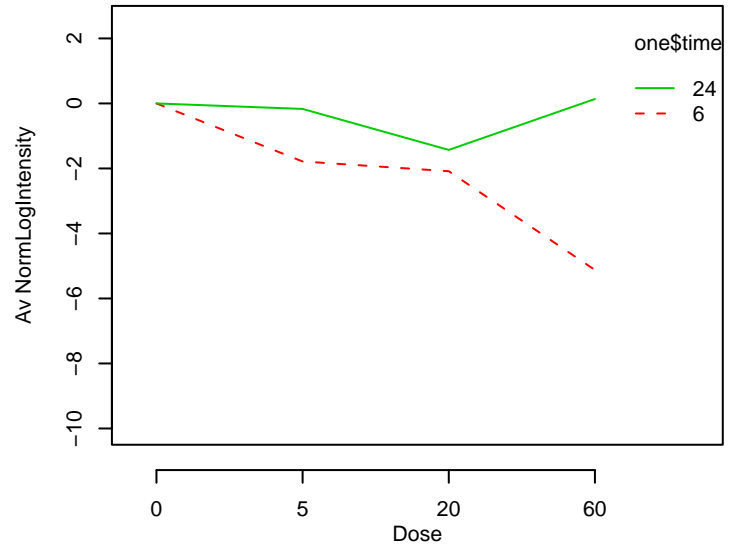

**GO\_0046824 : positive regulation of nucleocytoplasmic trans**

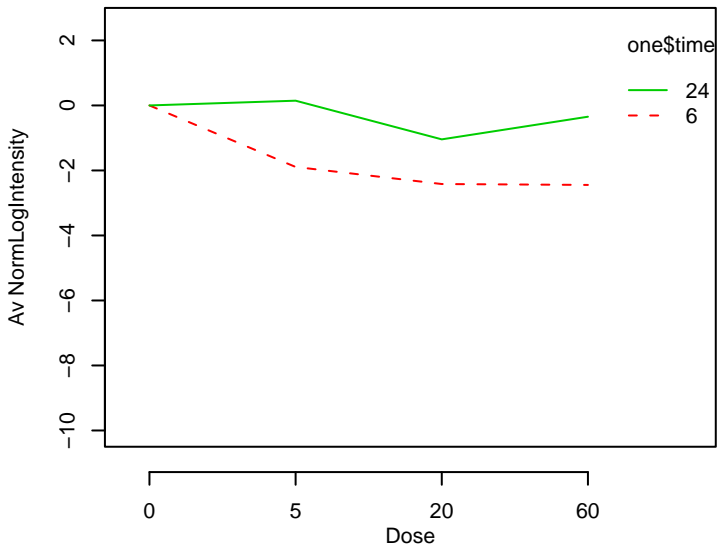

**GO\_0046831 : regulation of RNA export from nucleus**

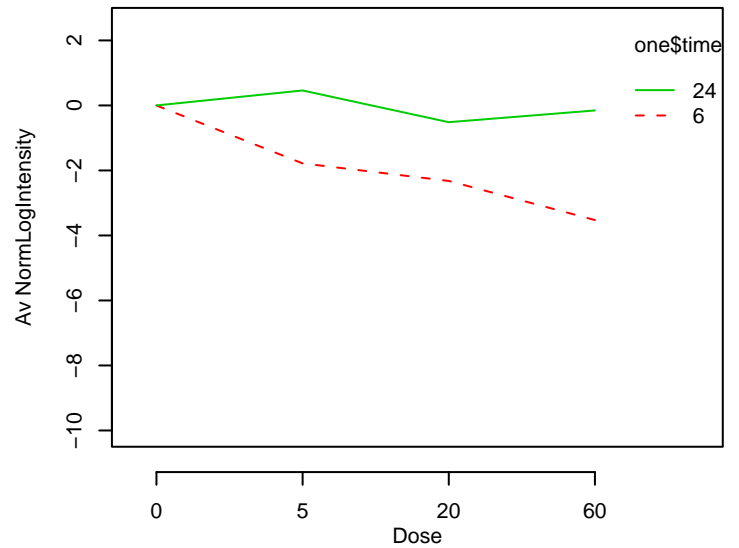

**GO\_0046835 : carbohydrate phosphorylation**

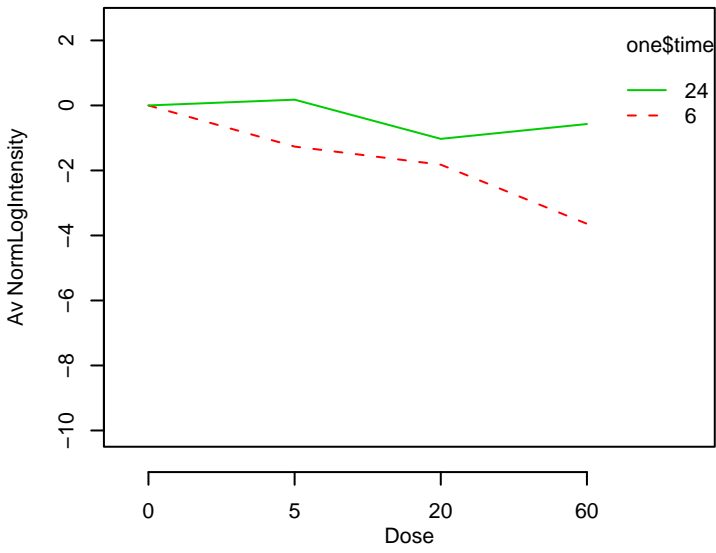

**GO\_0046839 : phospholipid dephosphorylation**

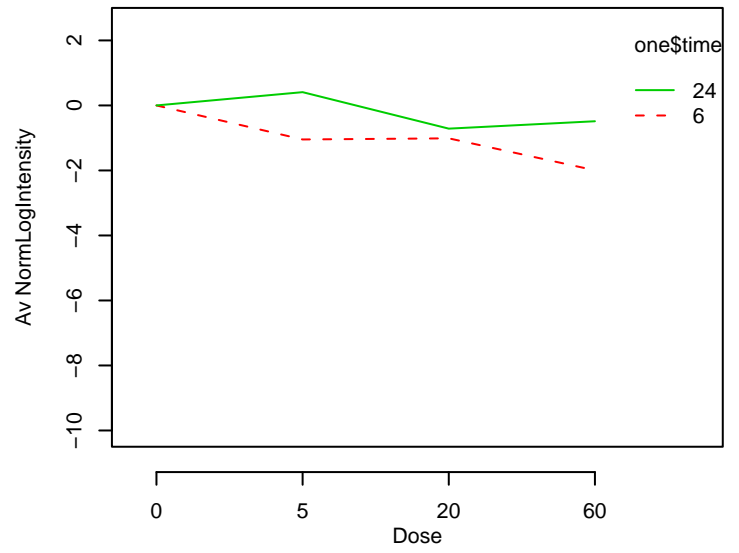

**GO\_0046847 : filopodium formation**

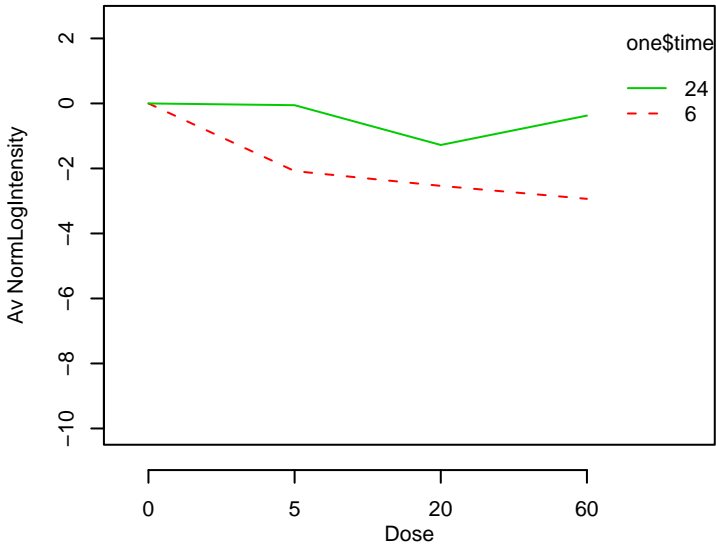

**GO\_0046849 : bone remodeling**

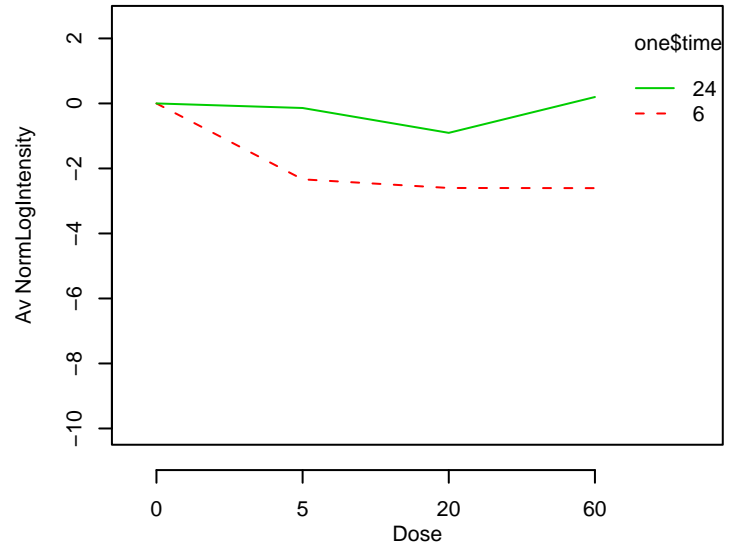

**GO\_0046850 : regulation of bone remodeling**

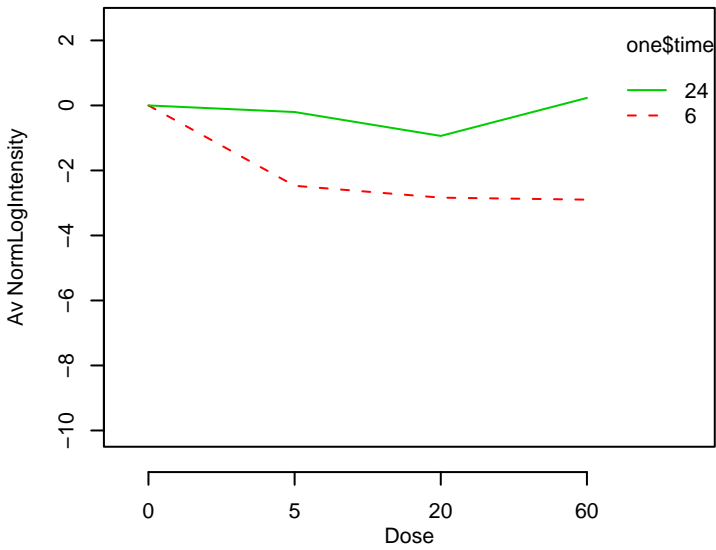

**GO\_0046851 : negative regulation of bone remodeling**

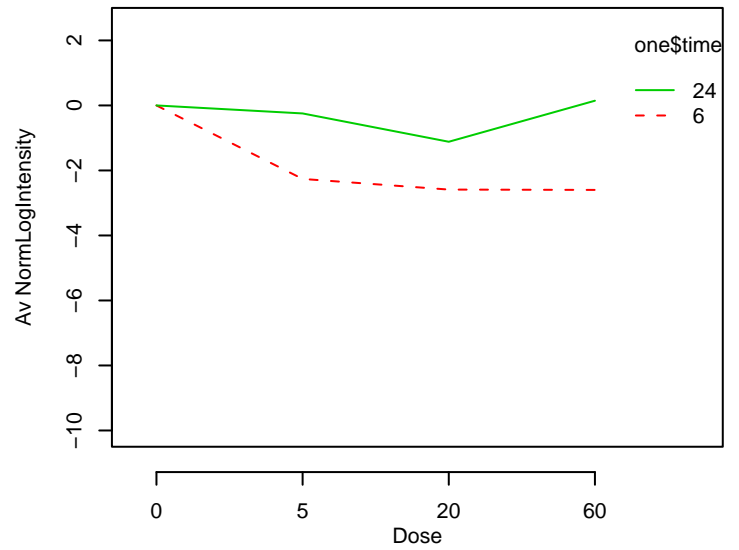

**GO\_0046852 : positive regulation of bone remodeling**

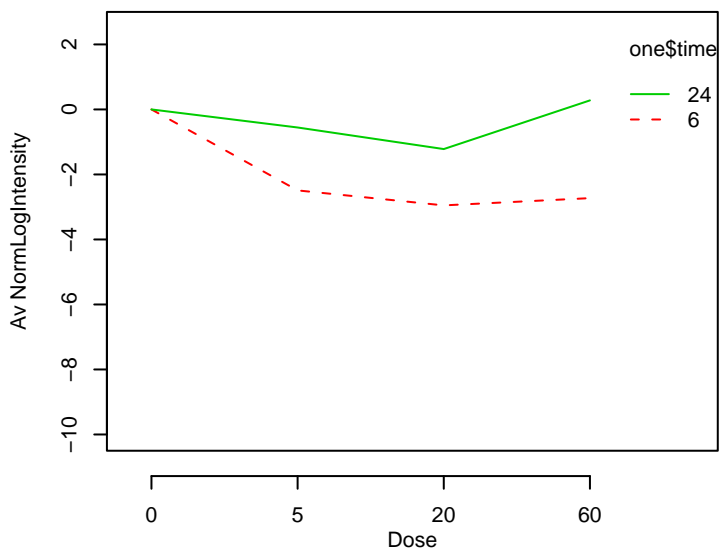

**GO\_0046879 : hormone secretion**

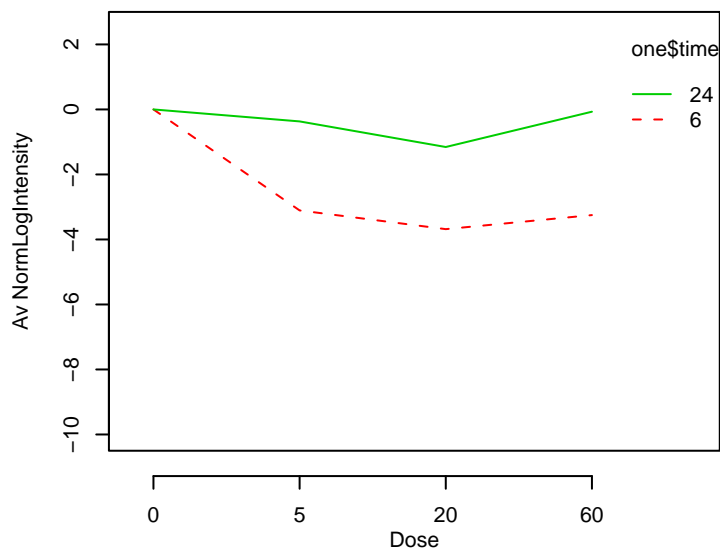

**GO\_0046883 : regulation of hormone secretion**

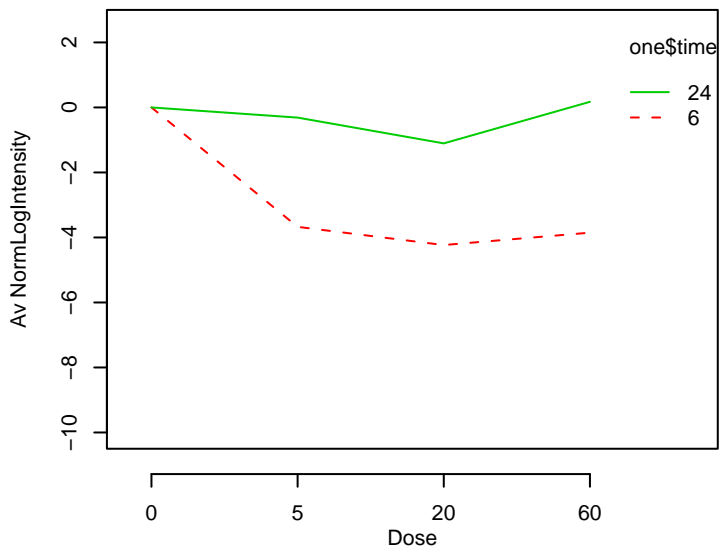

**GO\_0046888 : negative regulation of hormone secretion**

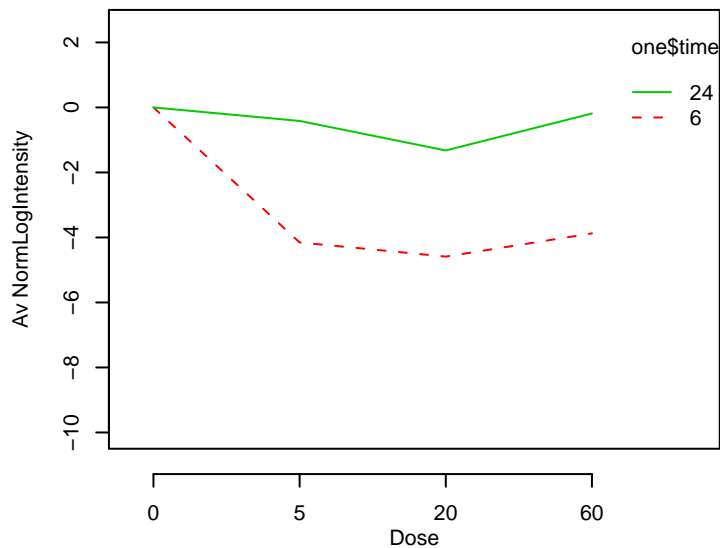

**GO\_0046890 : regulation of lipid biosynthesis**

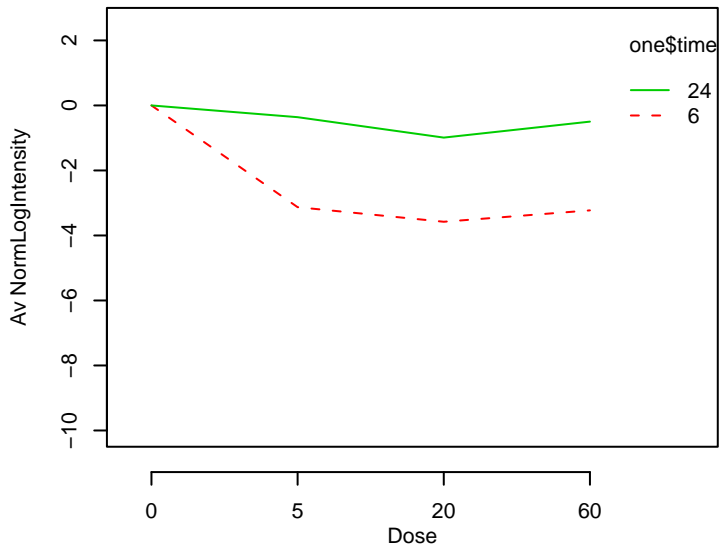

**GO\_0046916 : transition metal ion homeostasis**

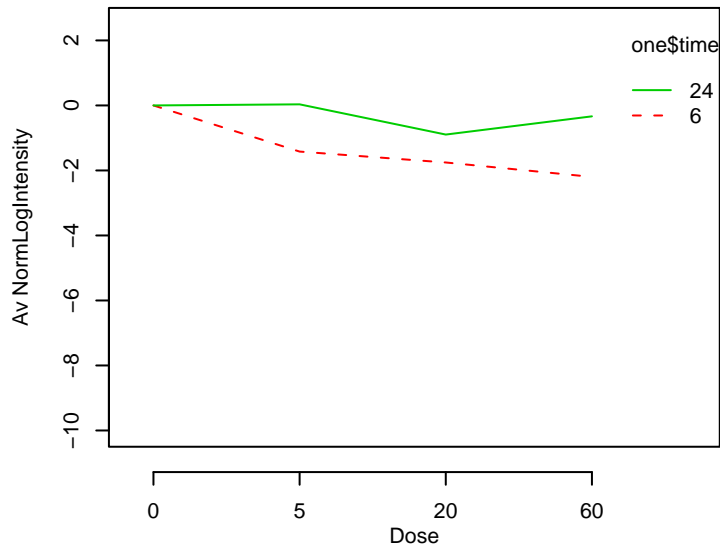

**GO\_0046928 : regulation of neurotransmitter secretion**

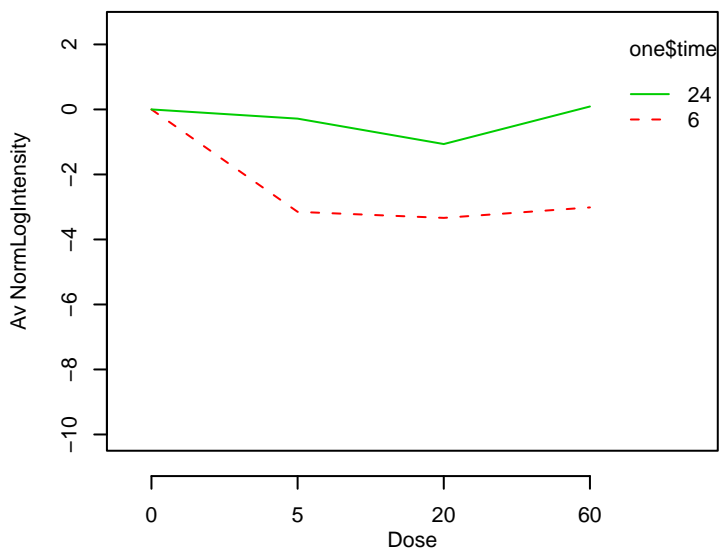

**GO\_0046942 : carboxylic acid transport**

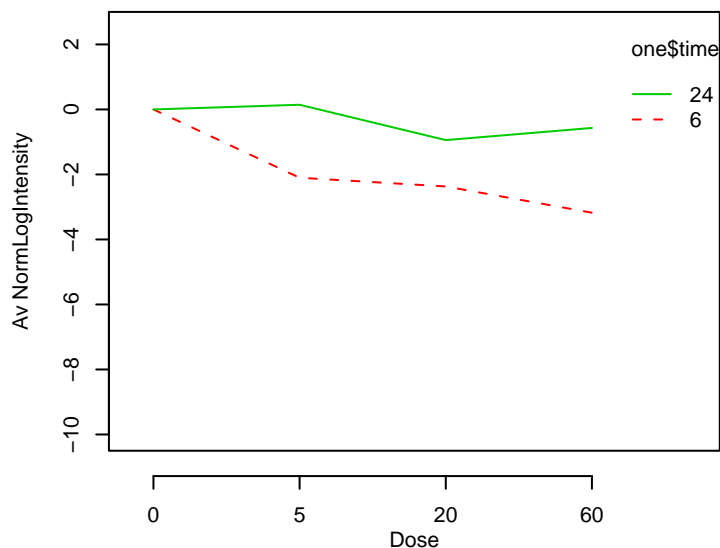

**GO\_0047496 : vesicle transport along microtubule**

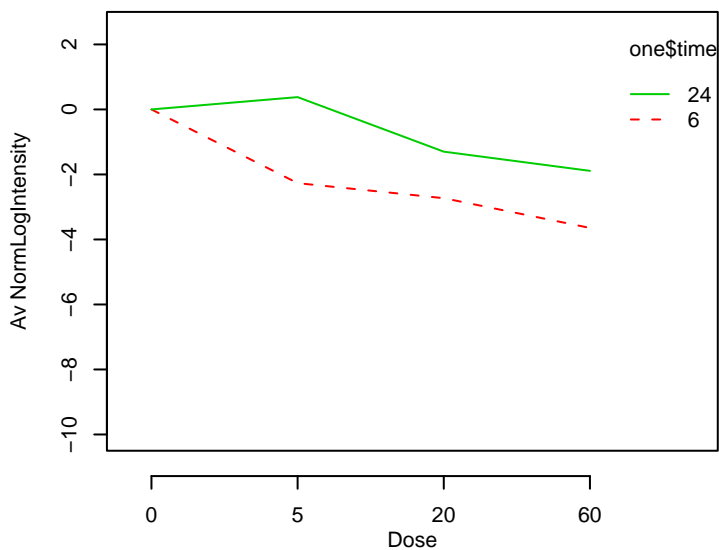

**GO\_0048009 : insulin-like growth factor receptor signaling p**

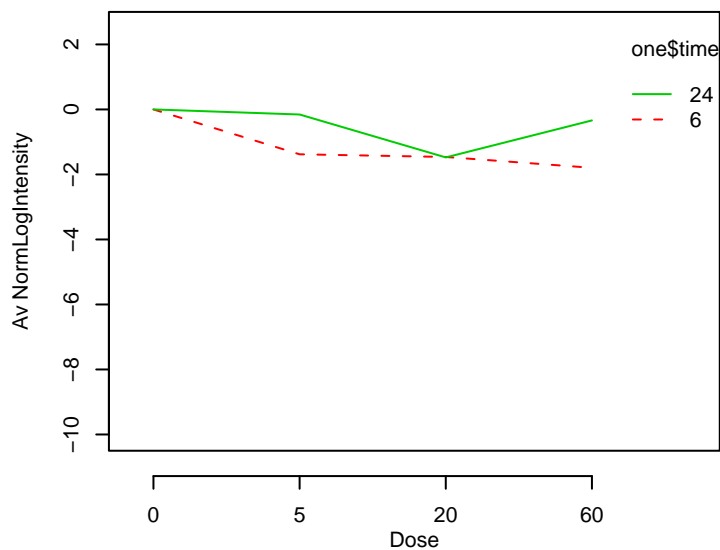

**GO\_0048015 : phosphoinositide-mediated signaling**

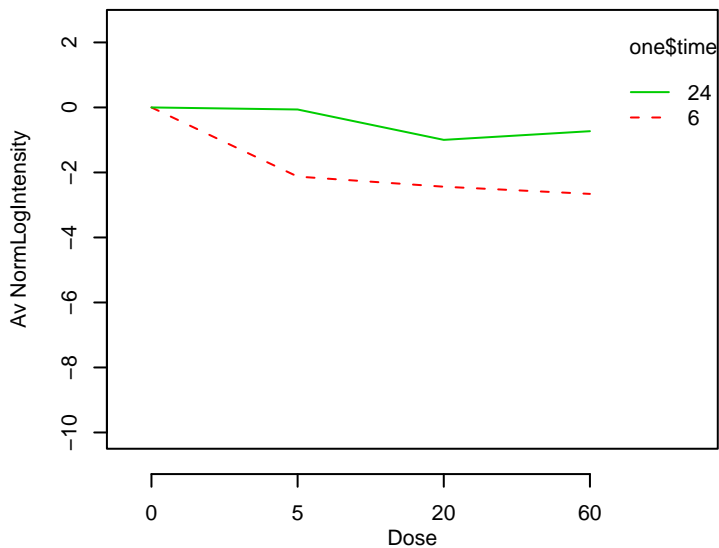

**GO\_0048041 : focal adhesion formation**

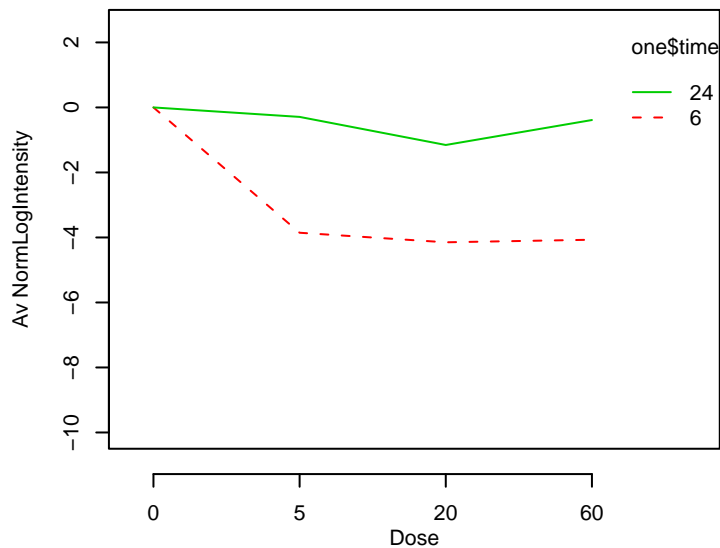

**GO\_0048048 : embryonic eye morphogenesis**

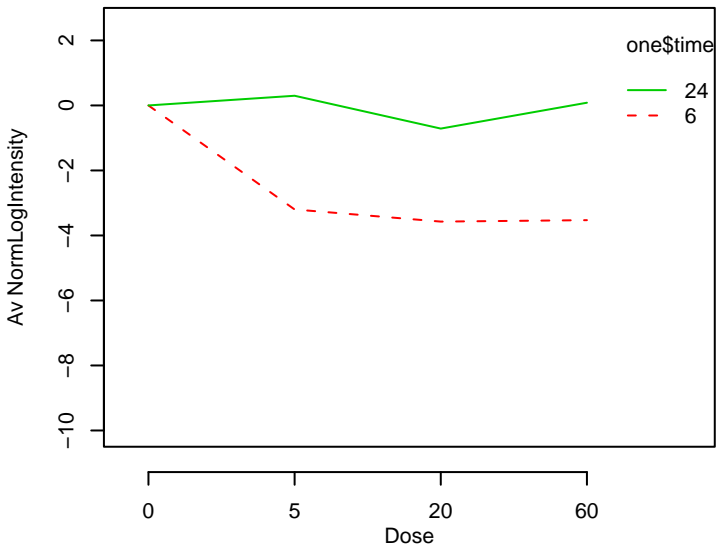

**GO\_0048066 : pigmentation during development**

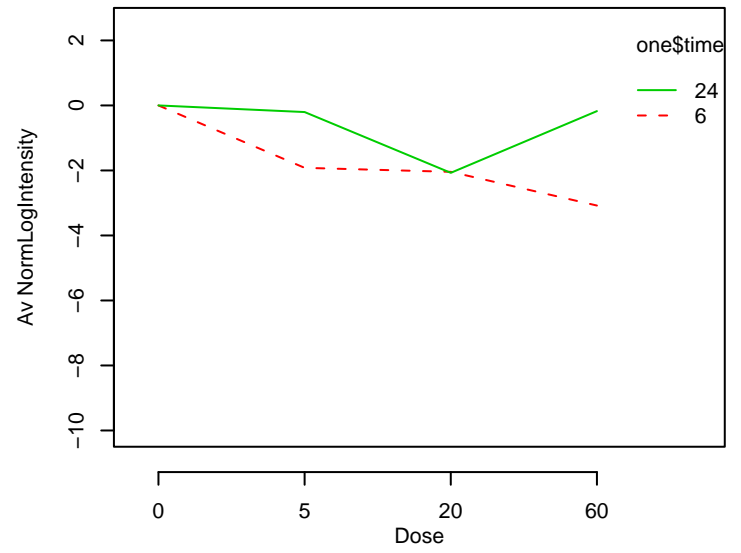

**GO\_0048069 : eye pigmentation**

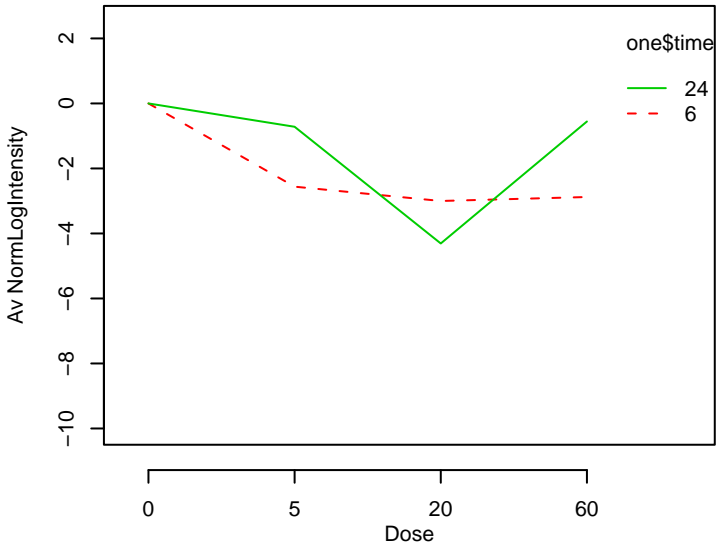

**GO\_0048144 : fibroblast proliferation**

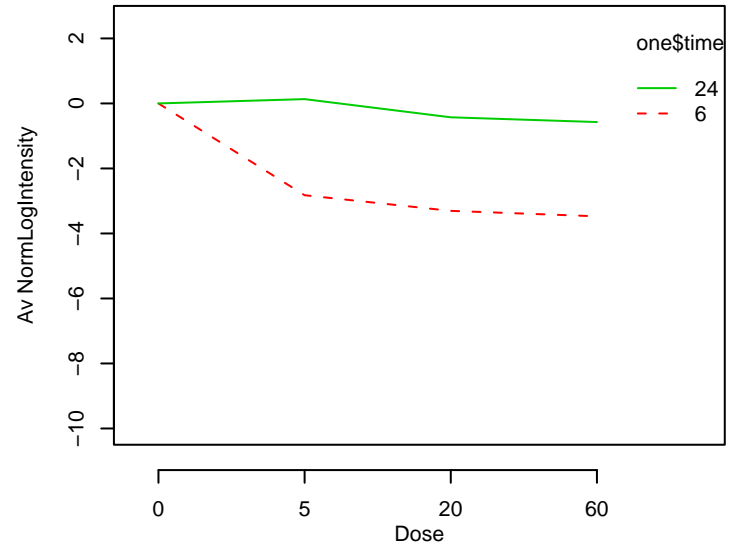

**GO\_0048145 : regulation of fibroblast proliferation**

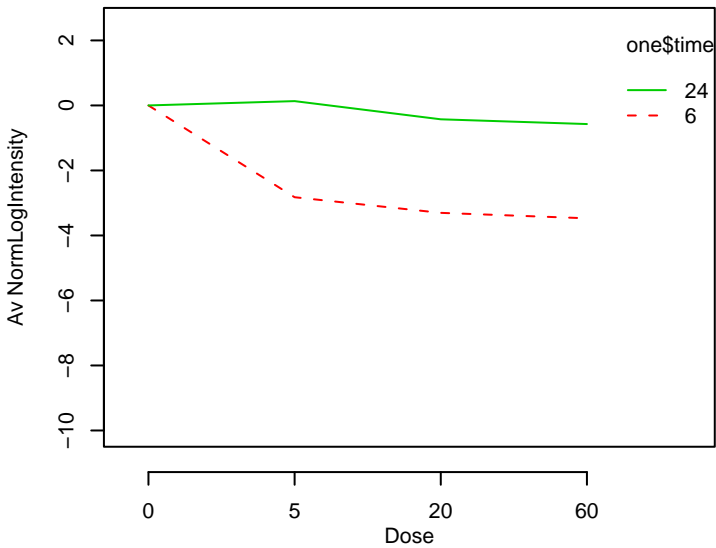

**GO\_0048157 : oogenesis (sensu Mammalia)**

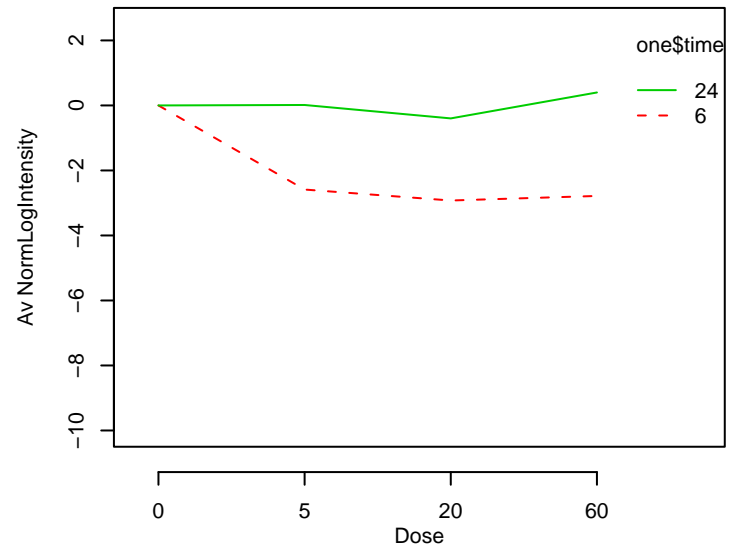

**GO\_0048167 : regulation of synaptic plasticity**

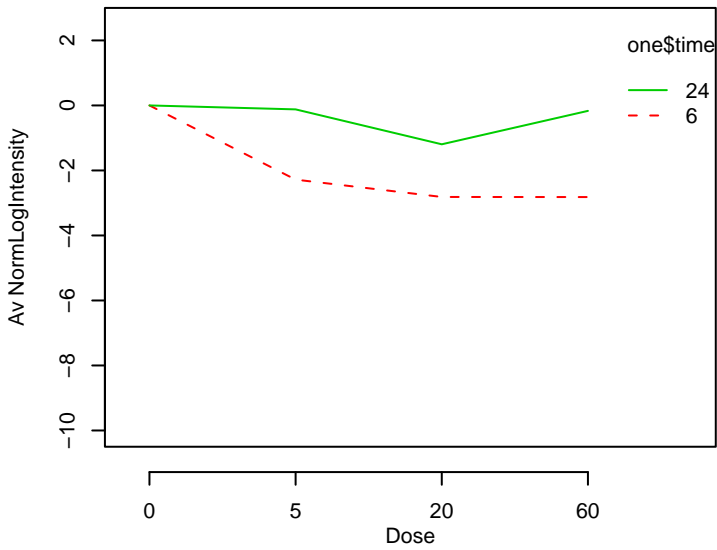

**GO\_0048168 : regulation of neuronal synaptic plasticity**

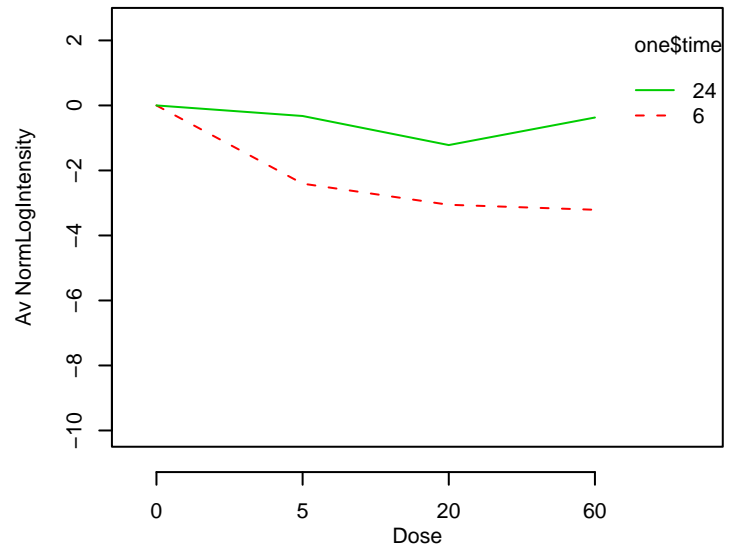

**GO\_0048169 : regulation of long-term neuronal synaptic pla:**

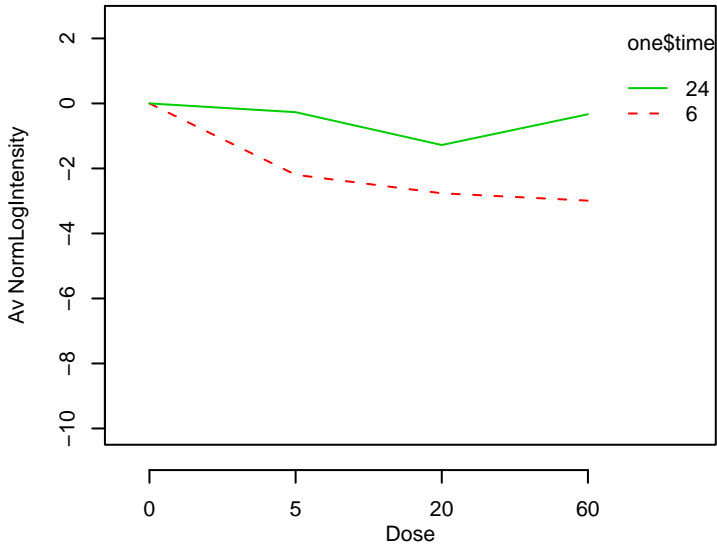

**GO\_0048193 : Golgi vesicle transport**

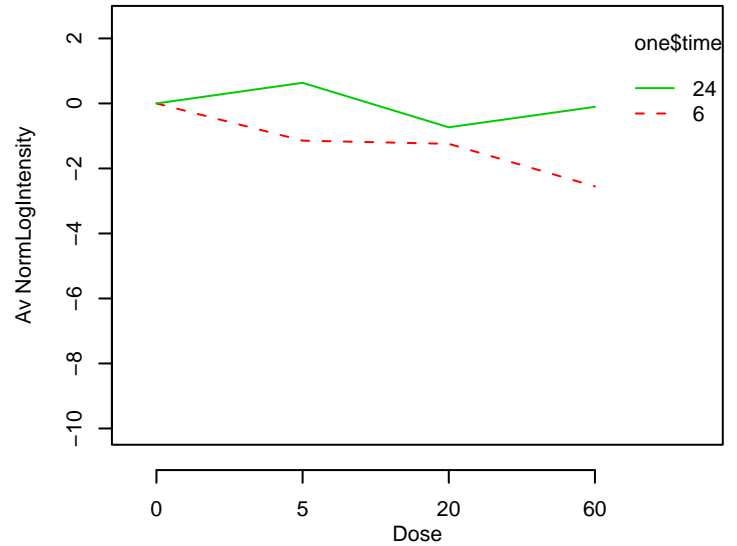

**GO\_0048232 : male gamete generation**

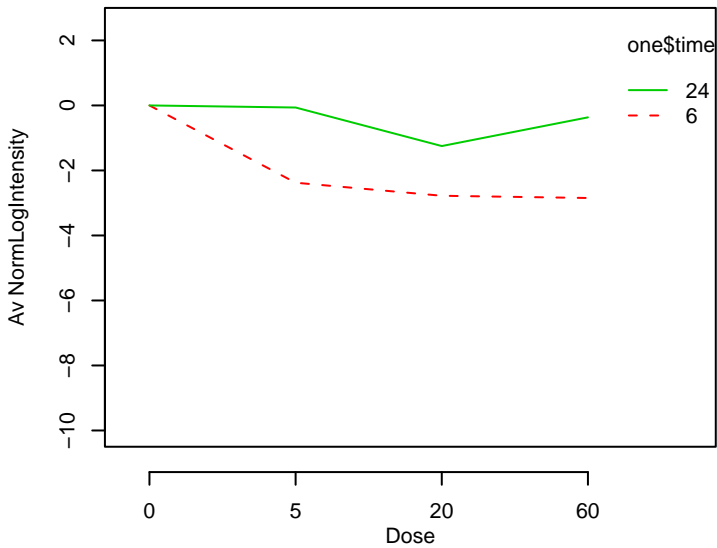

**GO\_0048259 : regulation of receptor mediated endocytosi**

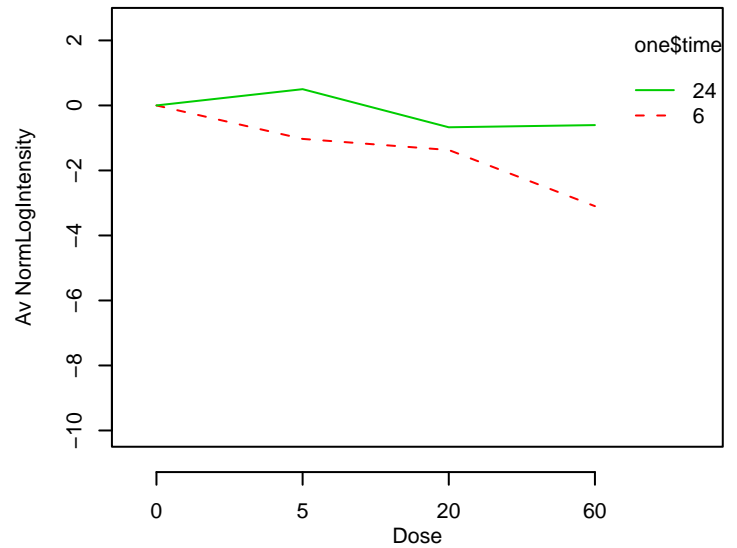

**GO\_0048260 : positive regulation of receptor mediated endoc**

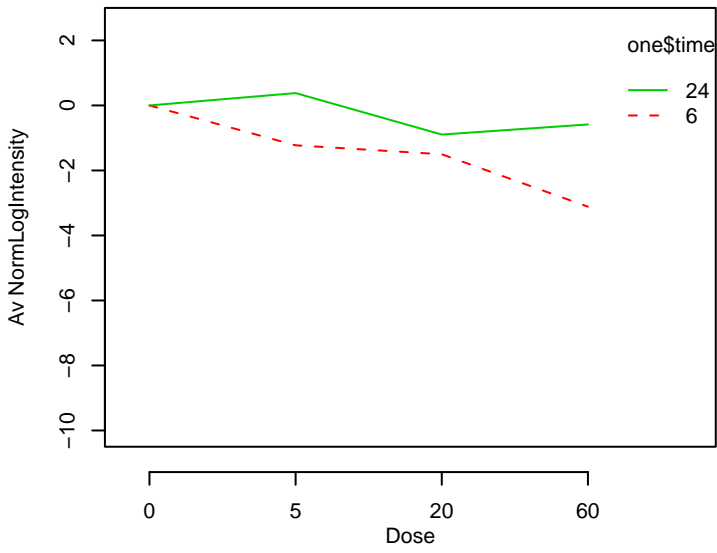

**GO\_0048265 : response to pain**

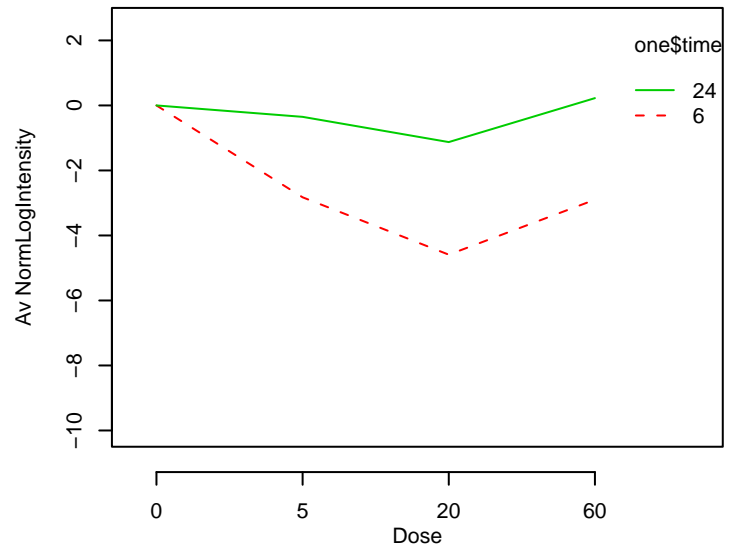

**GO\_0048276 : gastrulation (sensu Vertebrata)**

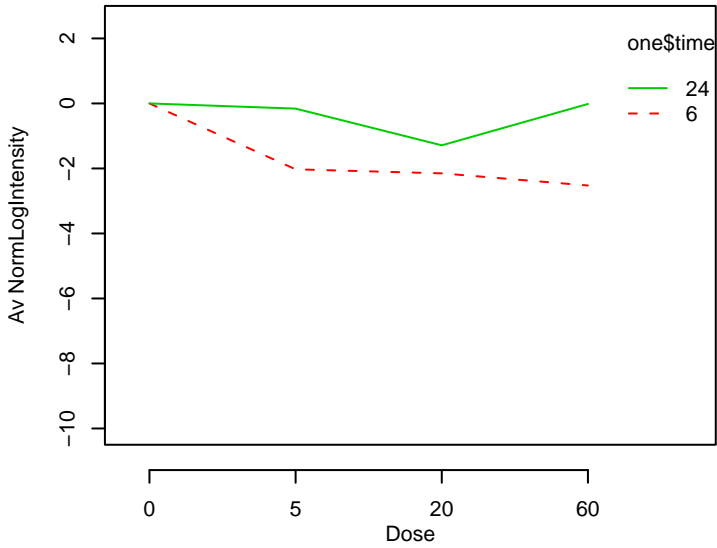

**GO\_0048278 : vesicle docking**

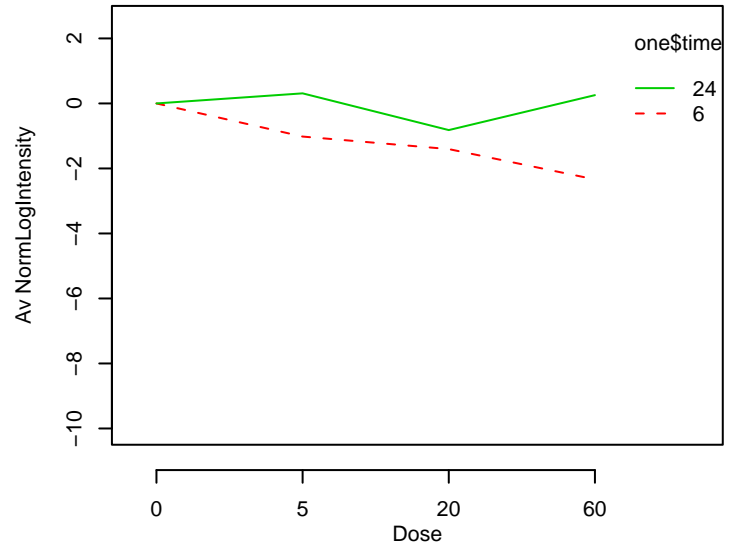

**GO\_0048285 : organelle fission**

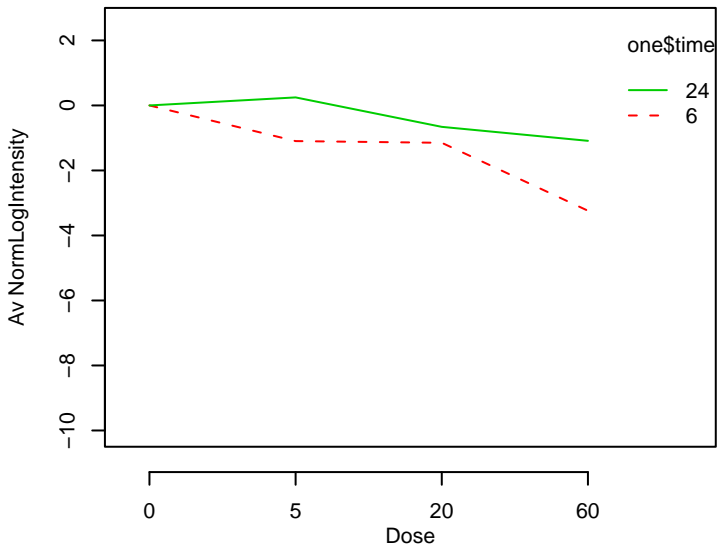

**GO\_0048286 : alveolus development**

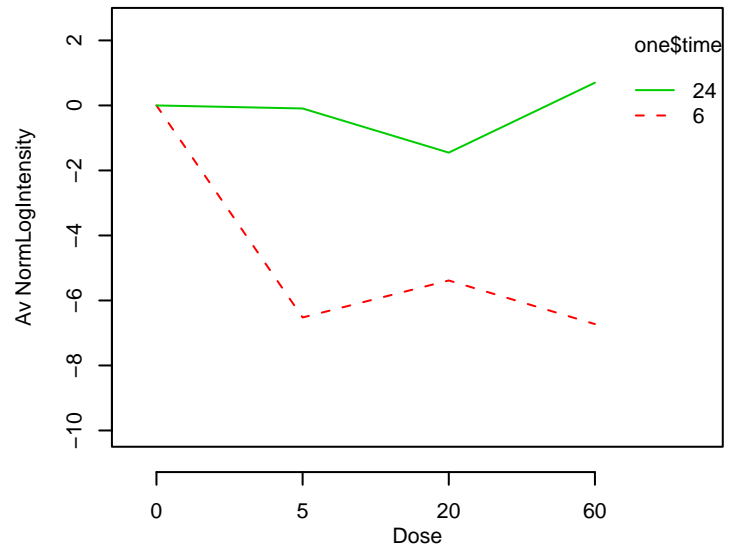

**GO\_0048291 : isotype switching to IgG isotypes**

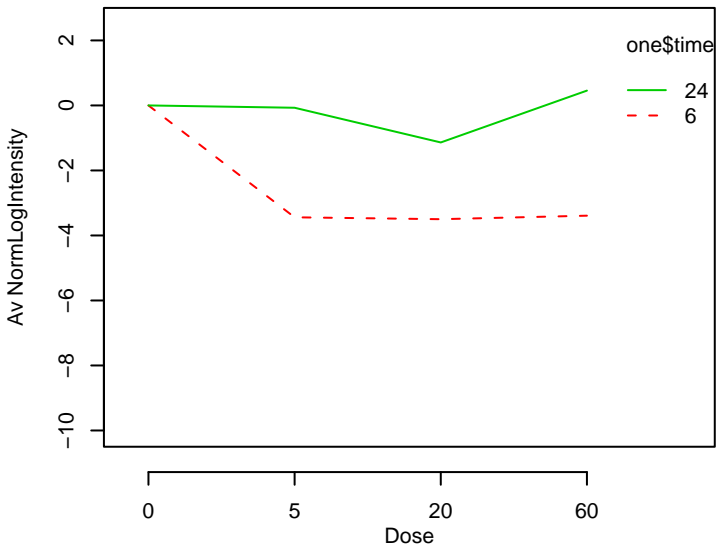

**GO\_0048302 : regulation of isotype switching to IgG isotyp**

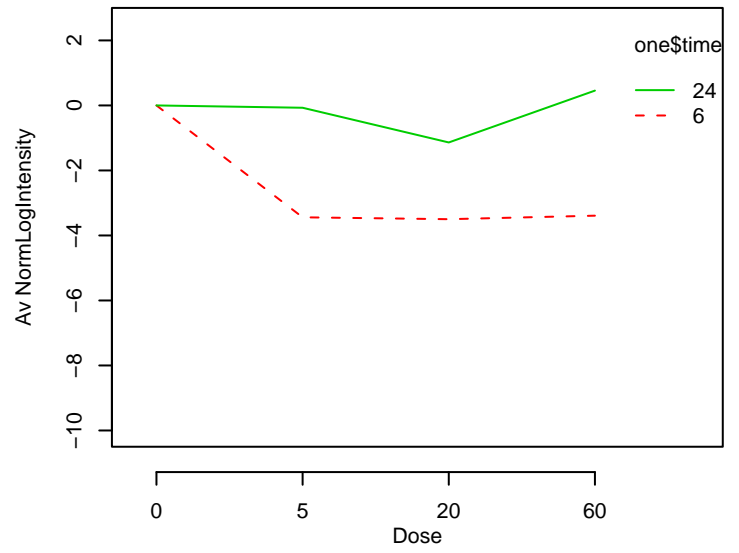

**GO\_0048304 : positive regulation of isotype switching to IgC**

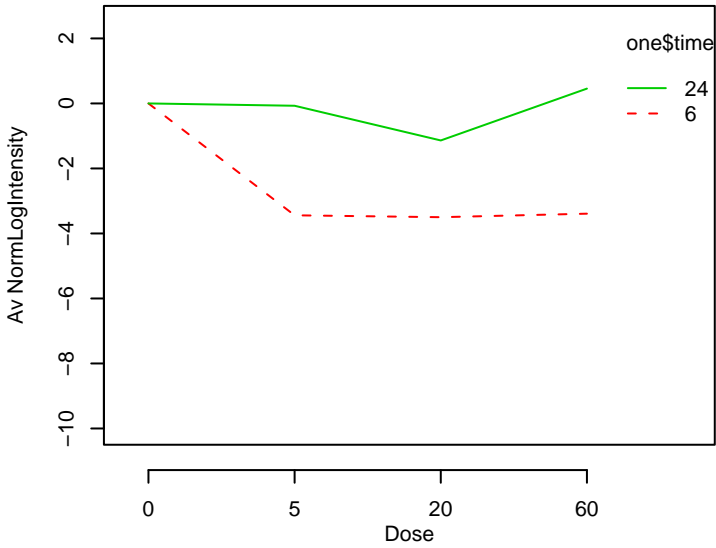

**GO\_0048305 : immunoglobulin secretion**

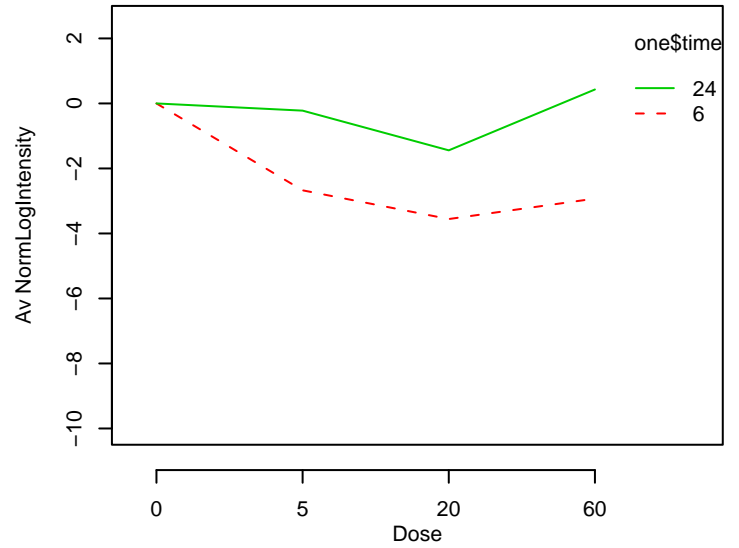

**GO\_0048332 : mesoderm morphogenesis**

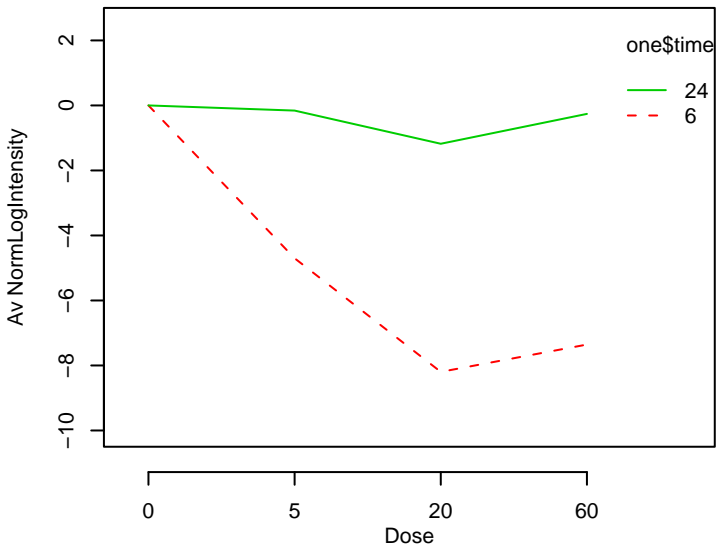

**GO\_0048339 : paraxial mesoderm development**

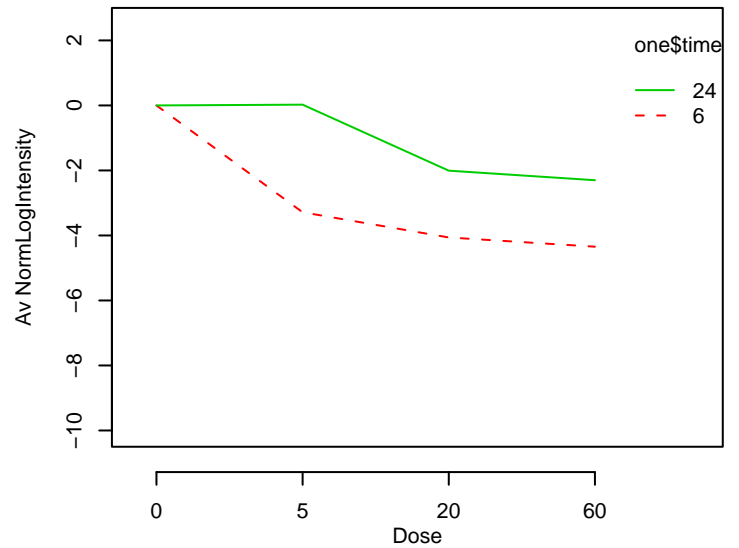



**GO\_0048469 : cell maturation**

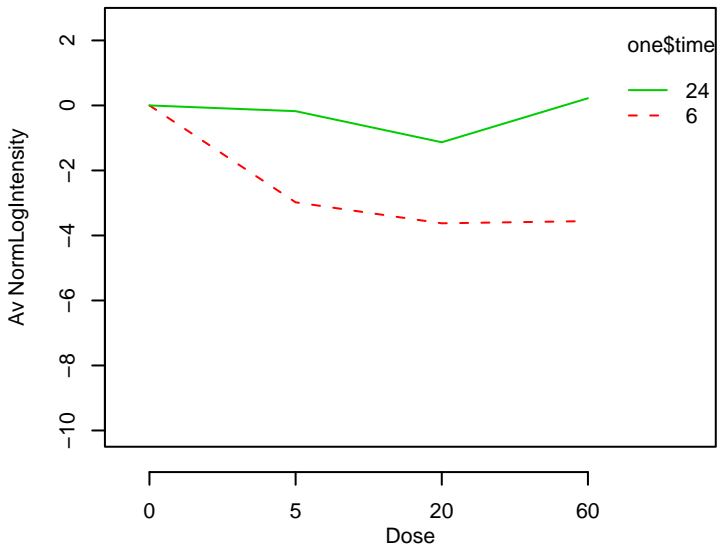

**GO\_0048477 : oogenesis**

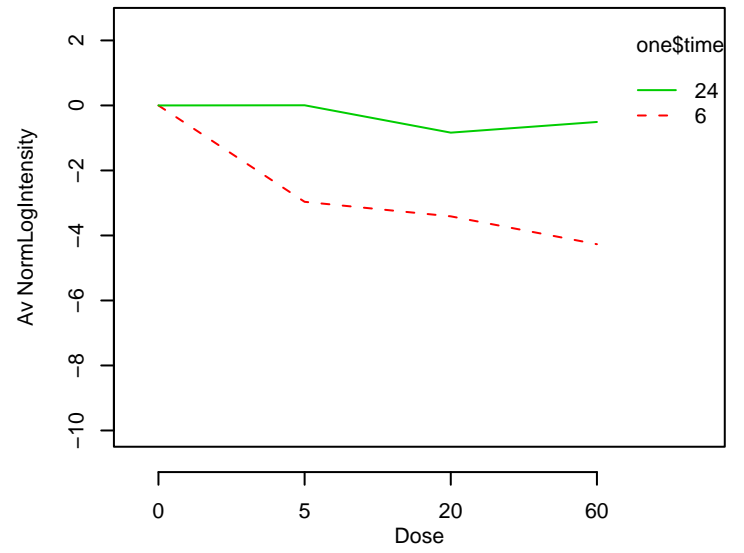

**GO\_0048488 : synaptic vesicle endocytosis**

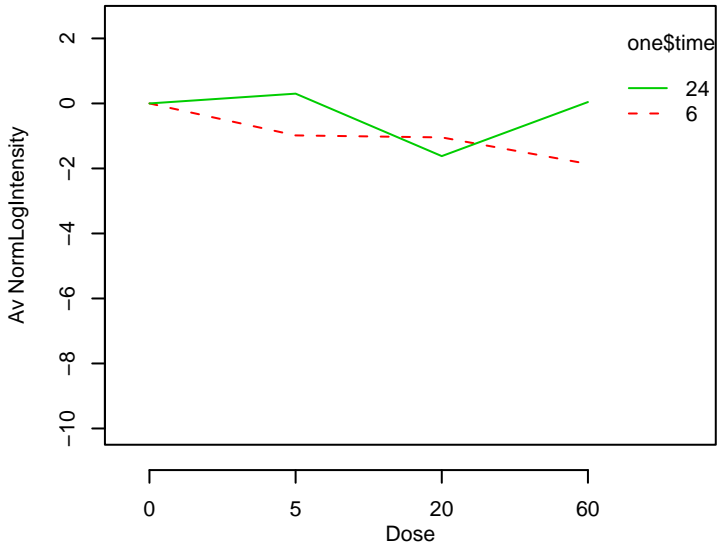

**GO\_0048489 : synaptic vesicle transport**

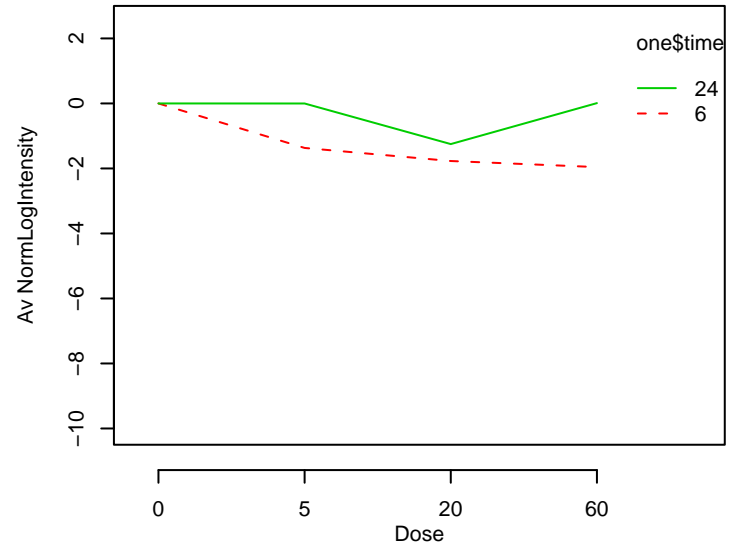

**GO\_0048511 : rhythmic process**

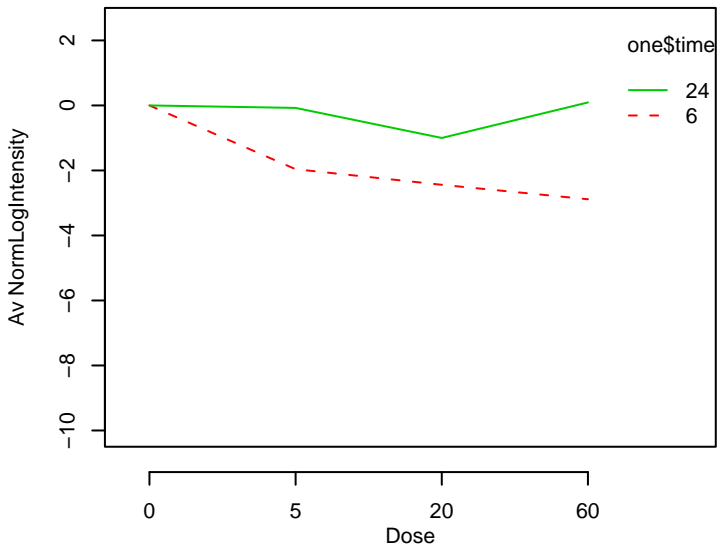

**GO\_0048514 : blood vessel morphogenesis**

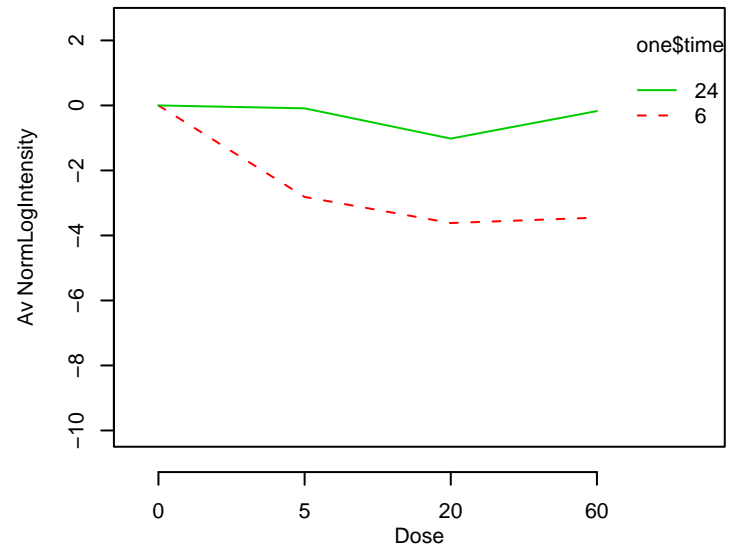

**GO\_0048515 : spermatid differentiation**

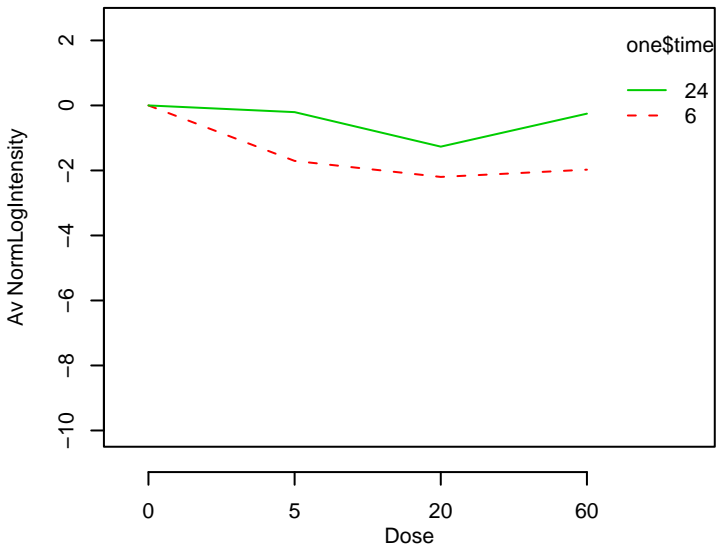

**GO\_0048534 : hemopoietic or lymphoid organ development**

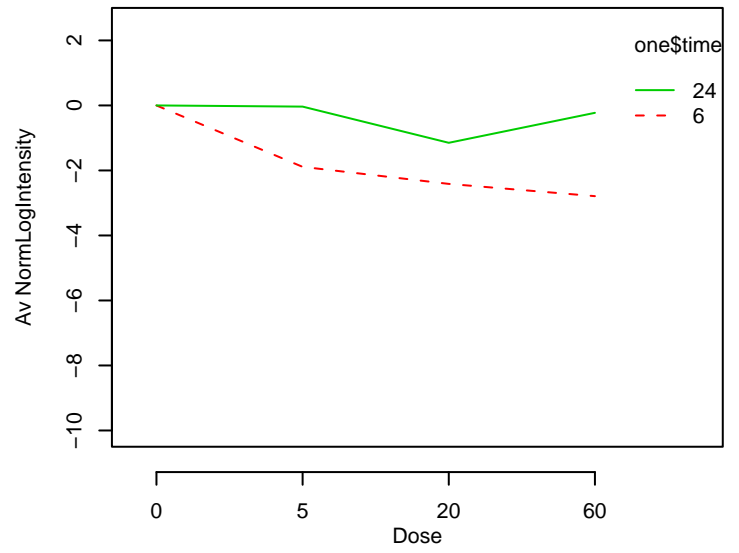

**GO\_0048535 : lymph node development**

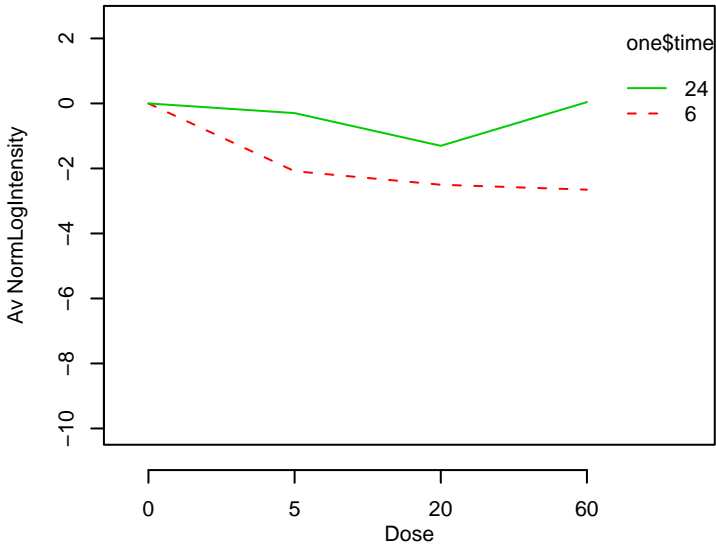

**GO\_0048546 : digestive tract morphogenesis**

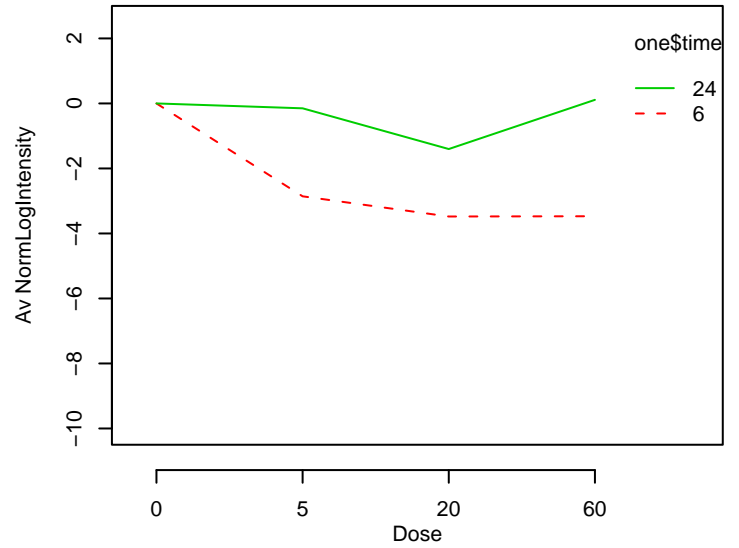

**GO\_0048547 : gut morphogenesis**

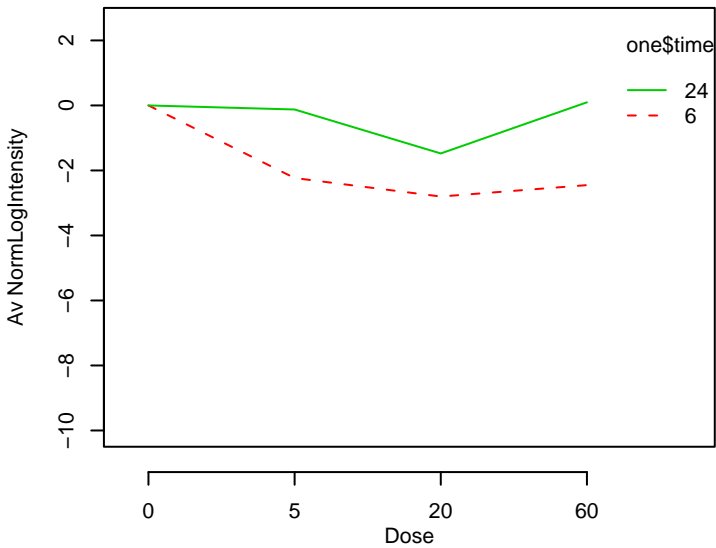

**GO\_0048557 : embryonic digestive tract morphogenesis**

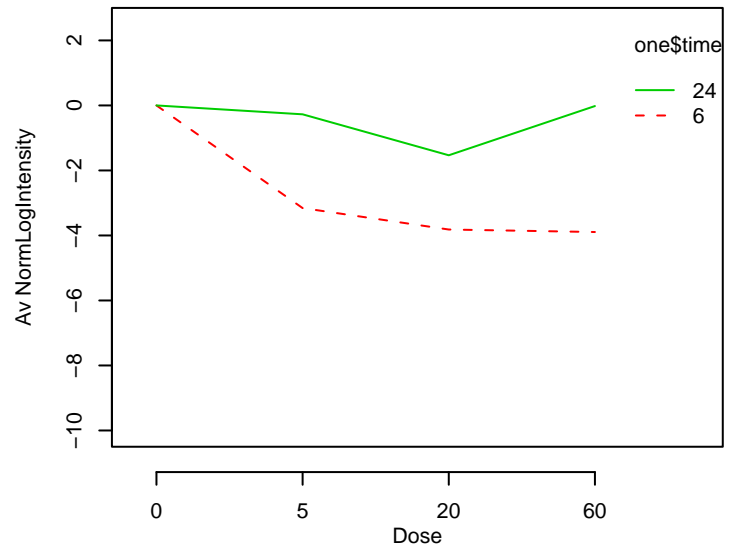

**GO\_0048558 : embryonic gut morphogenesis**

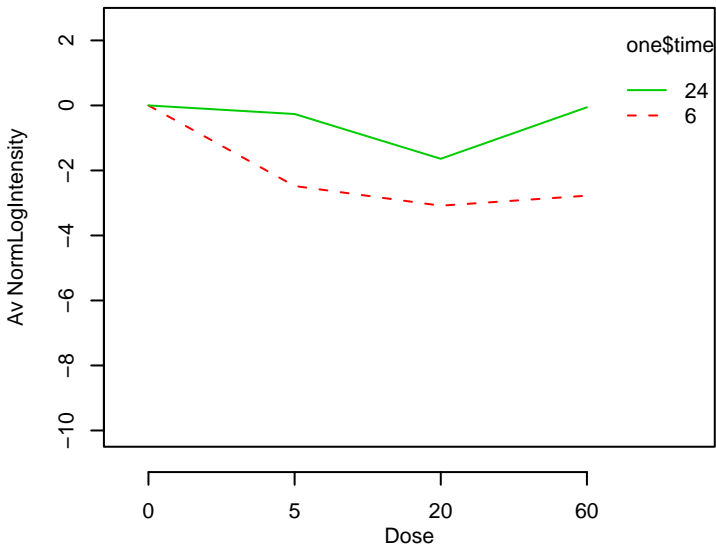

**GO\_0048562 : embryonic organ morphogenesis**

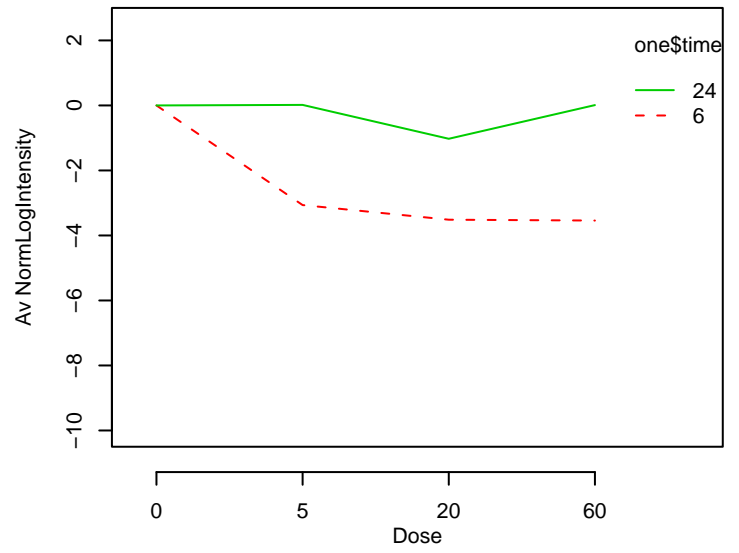

**GO\_0048565 : gut development**

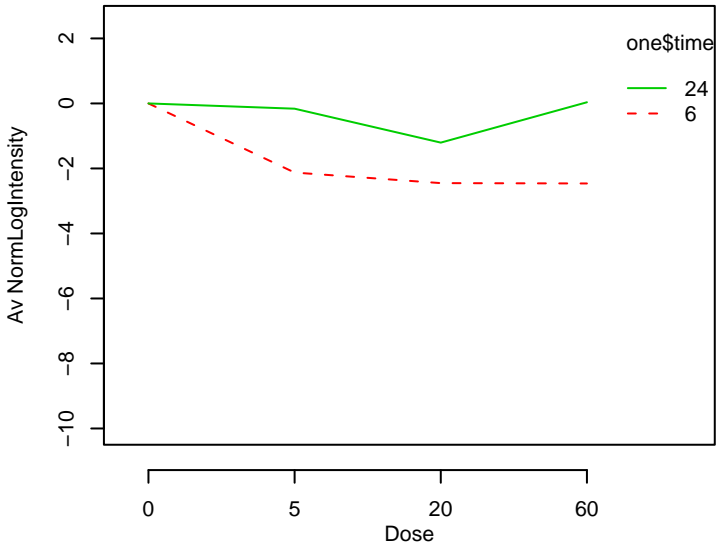

**GO\_0048566 : embryonic gut development**

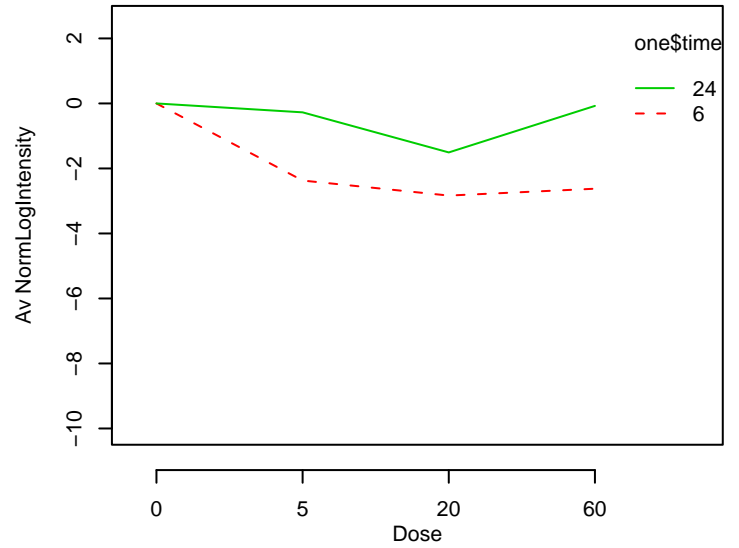

**GO\_0048567 : ectodermal gut morphogenesis**

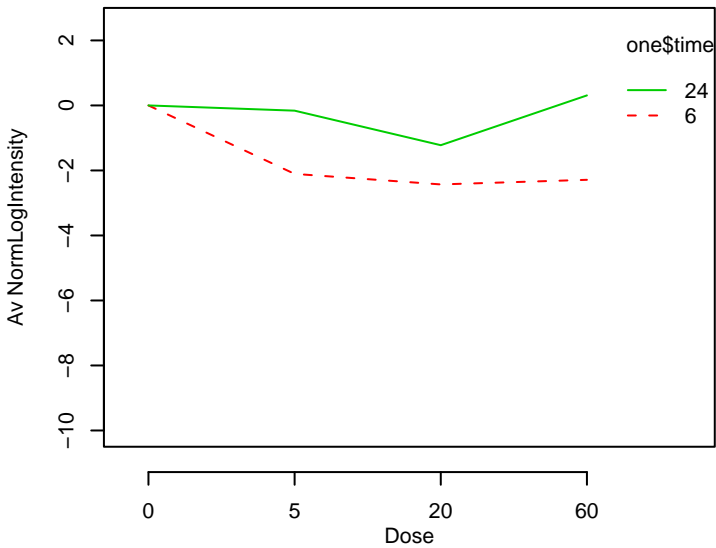

**GO\_0048568 : embryonic organ development**

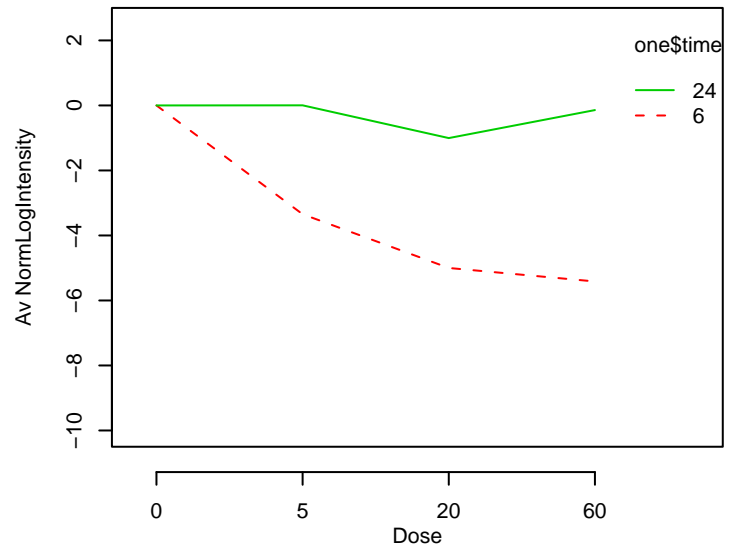

**GO\_0048589 : developmental growth**

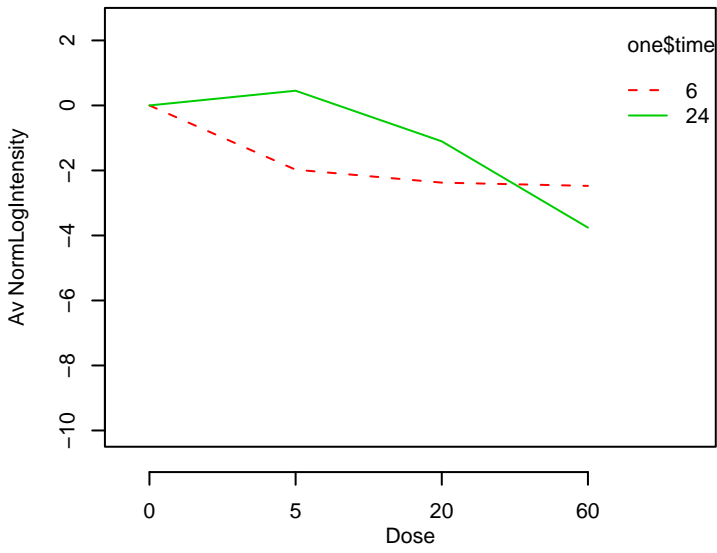

**GO\_0048592 : eye morphogenesis**

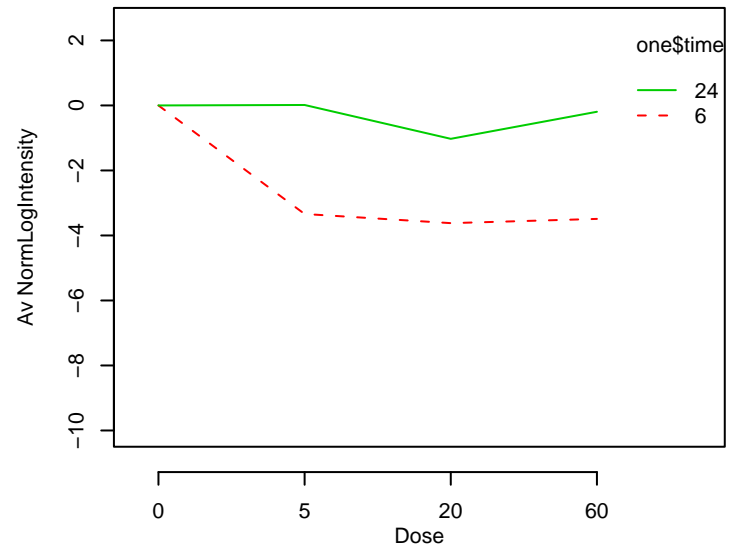

**GO\_0048593 : eye morphogenesis (sensu Vertebrata)**

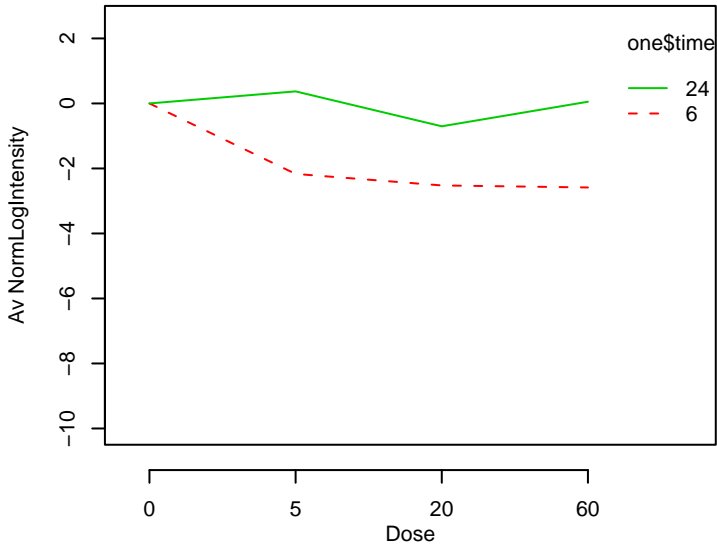

**GO\_0048595 : eye morphogenesis (sensu Mammalia)**

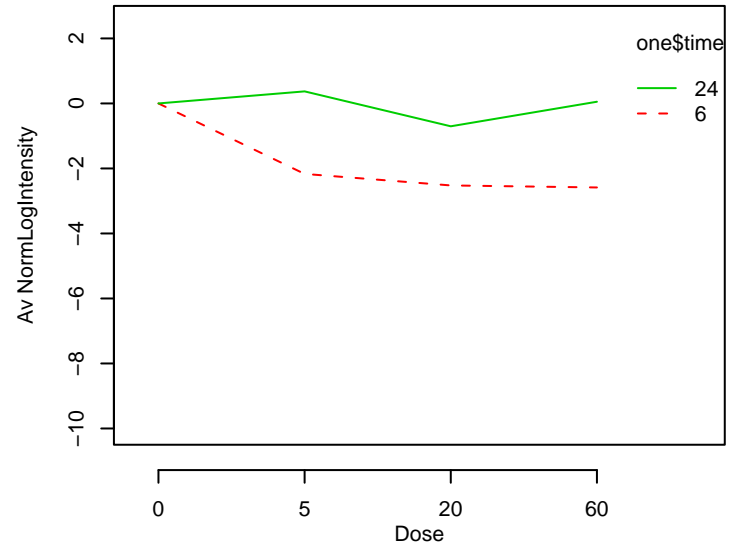

**GO\_0048598 : embryonic morphogenesis**

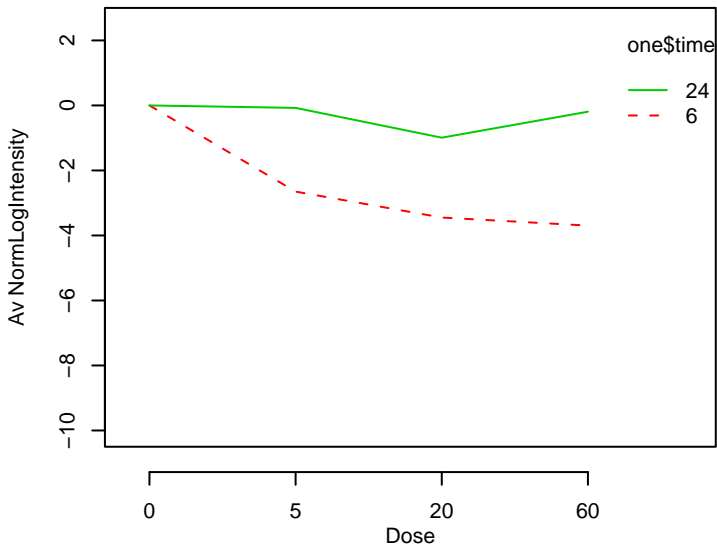

**GO\_0048599 : oocyte development**

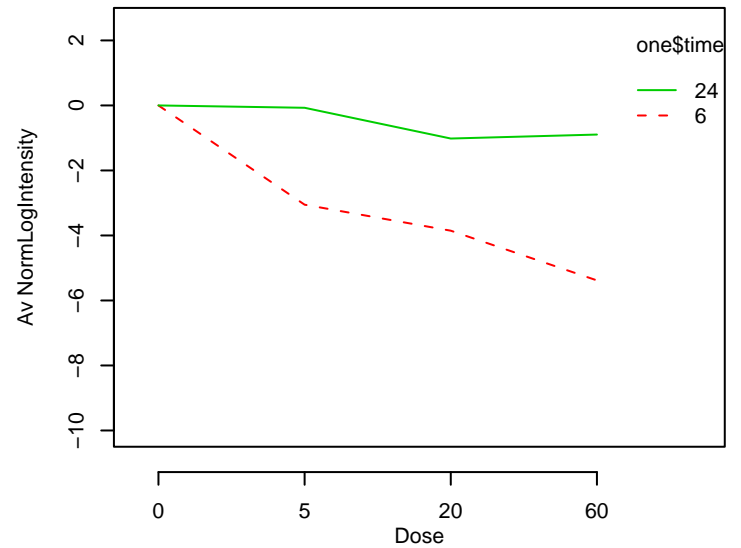

**GO\_0048609 : reproductive organismal physiological proce**

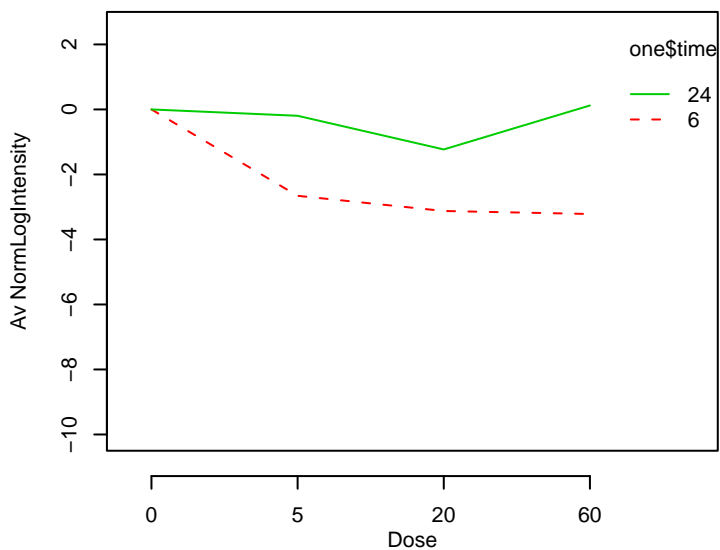

**GO\_0048627 : myoblast development**

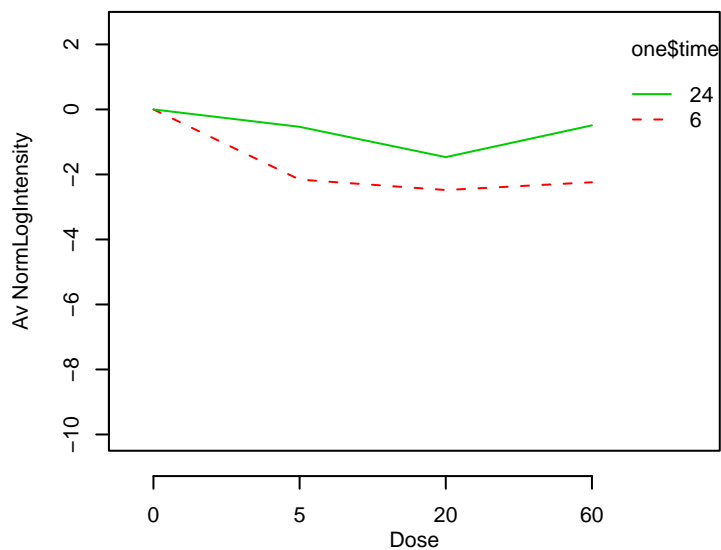

**GO\_0048628 : myoblast maturation**

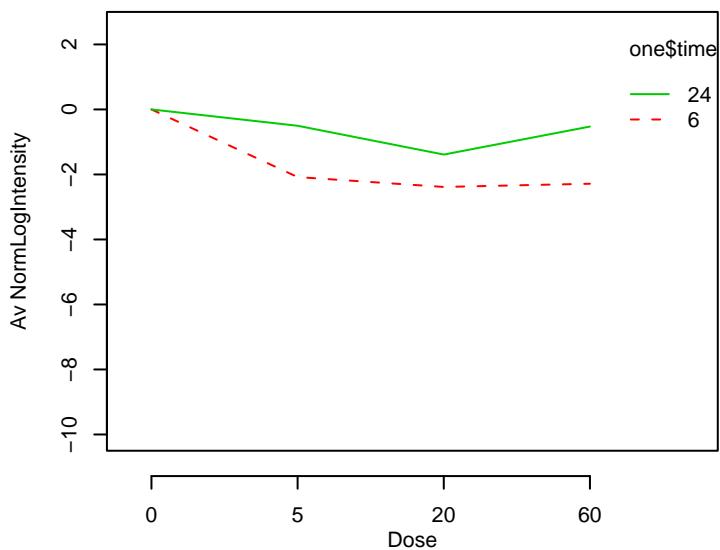

**GO\_0048637 : skeletal muscle development**

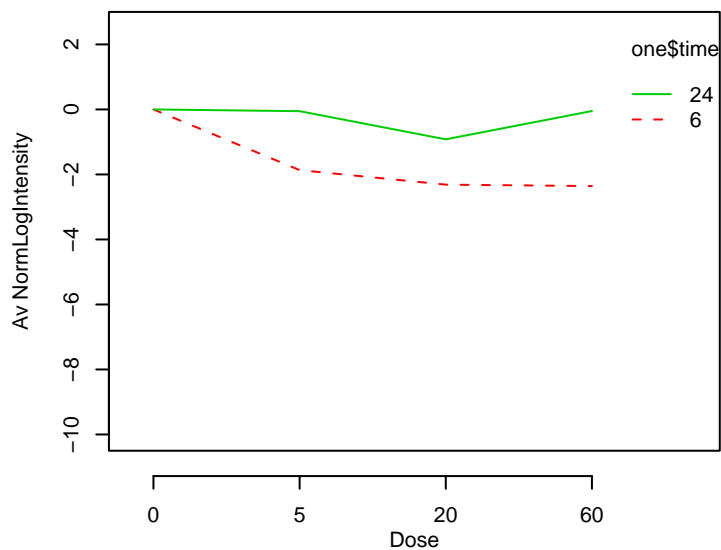

**GO\_0048646 : anatomical structure formation**

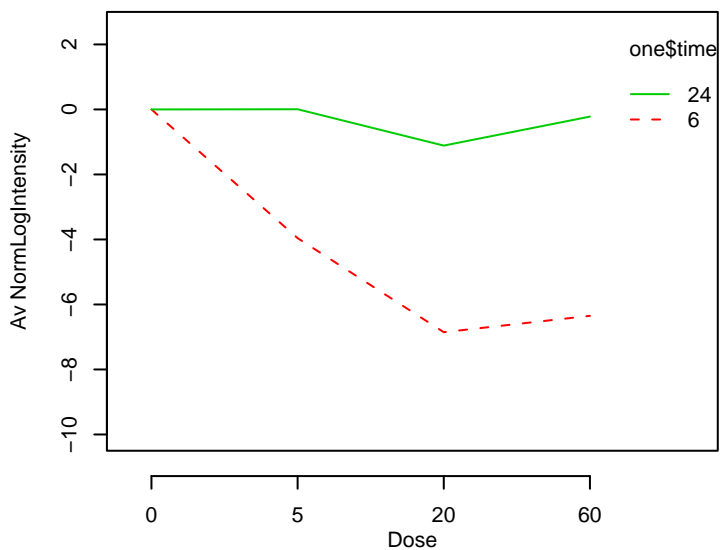

**GO\_0048659 : smooth muscle cell proliferation**

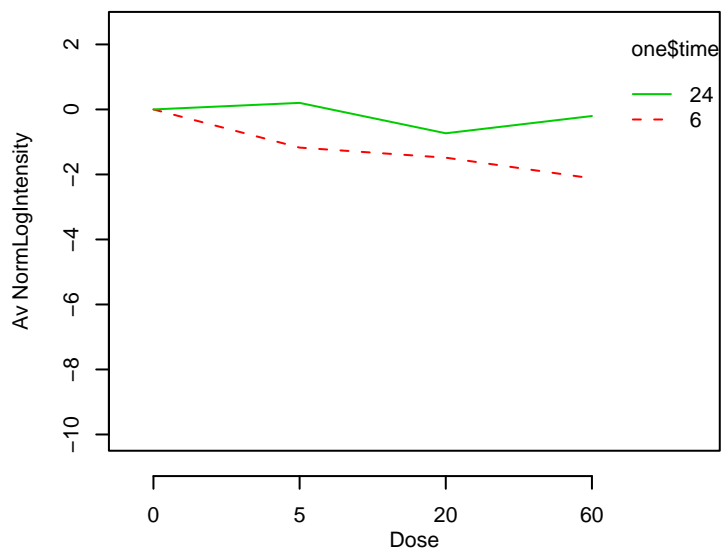

**GO\_0048660 : regulation of smooth muscle cell proliferatic**

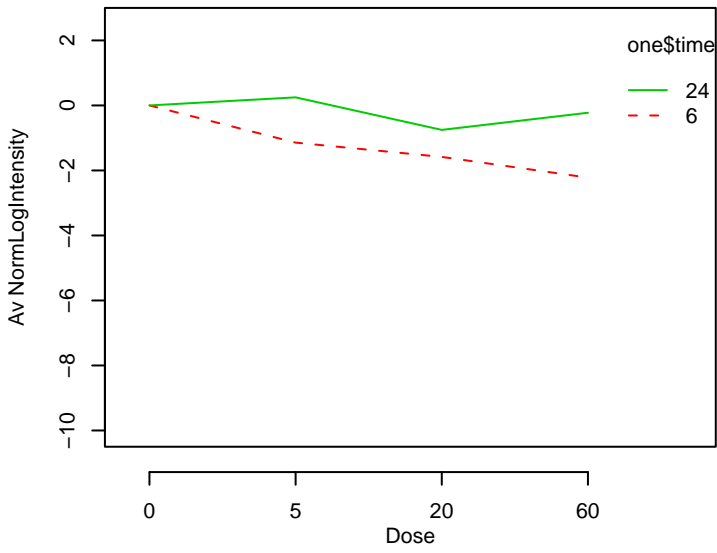

**GO\_0048663 : neuron fate commitment**

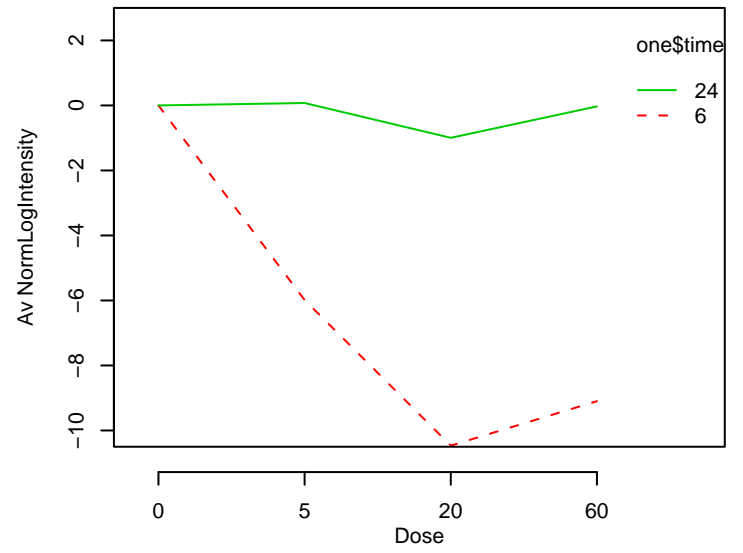

**GO\_0048666 : neuron development**

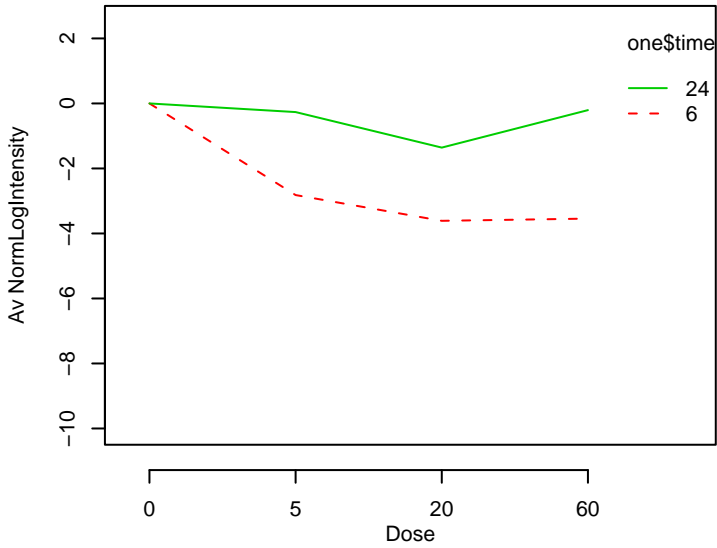

**GO\_0048667 : neuron morphogenesis during differentiatio**

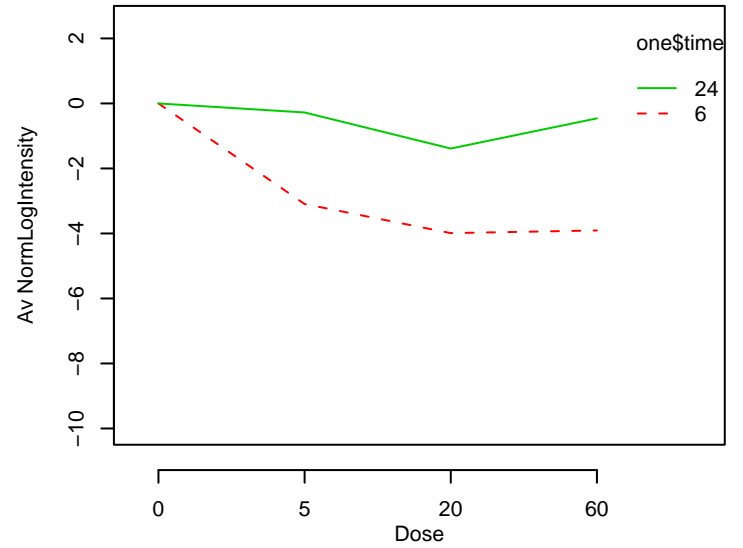

**GO\_0048675 : axon extension**

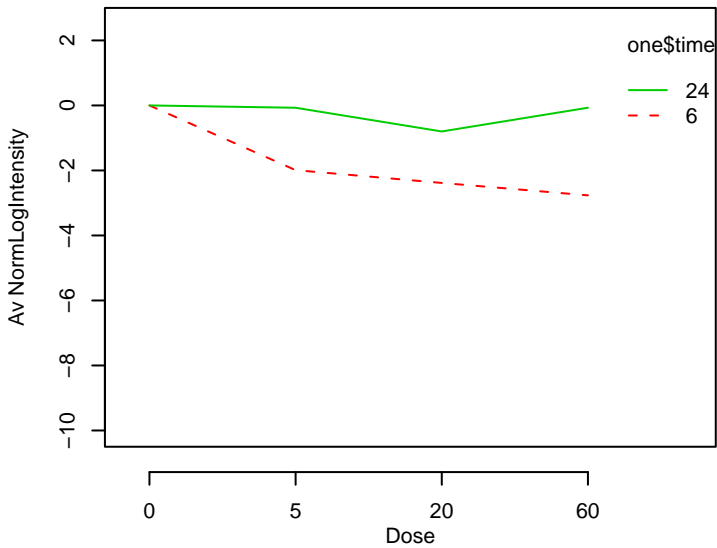

**GO\_0048704 : embryonic skeletal morphogenesis**

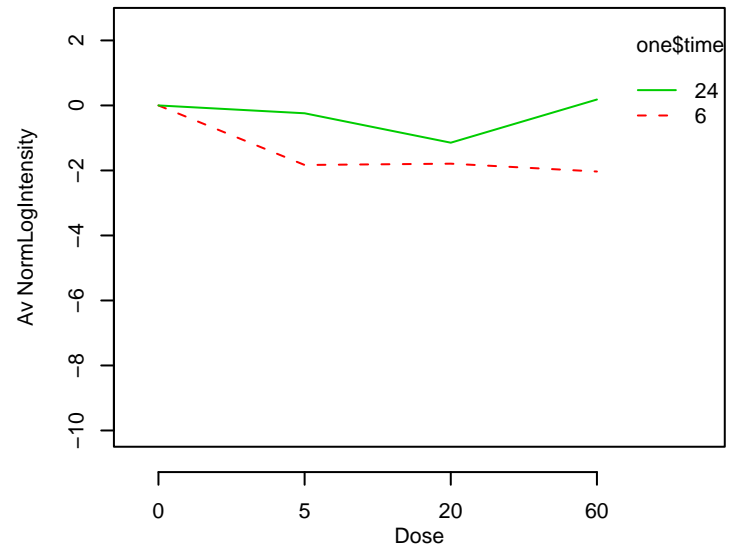

**GO\_0048705 : skeletal morphogenesis**

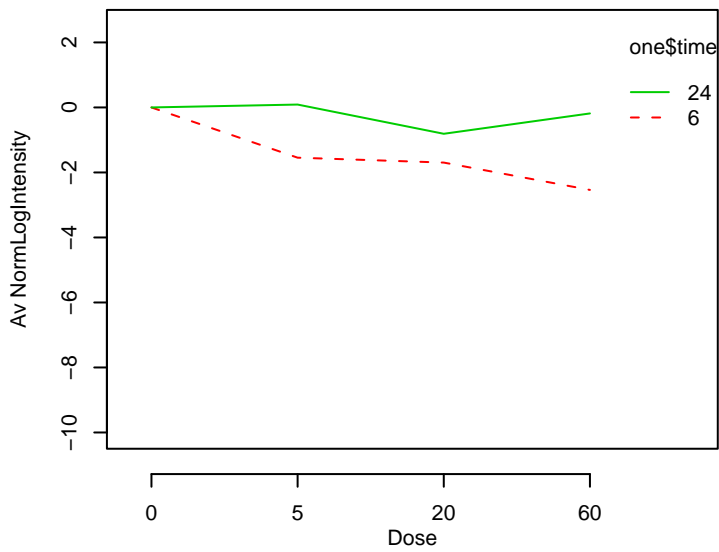

**GO\_0048706 : embryonic skeletal development**

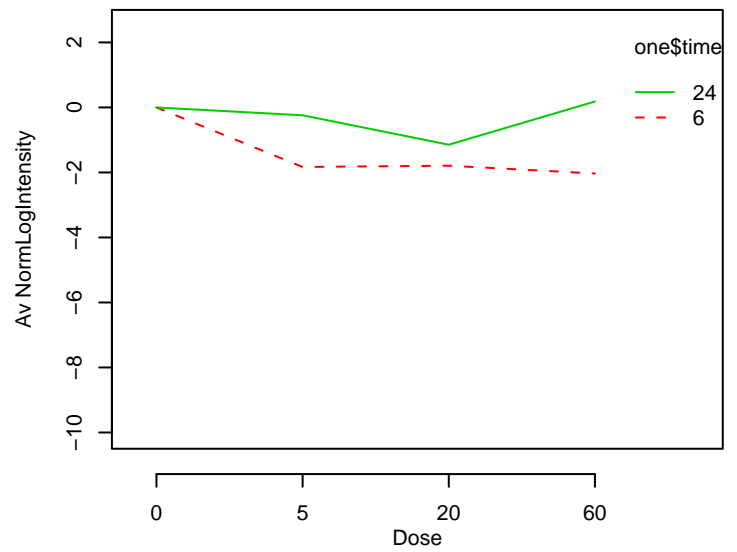

**GO\_0048709 : oligodendrocyte differentiation**

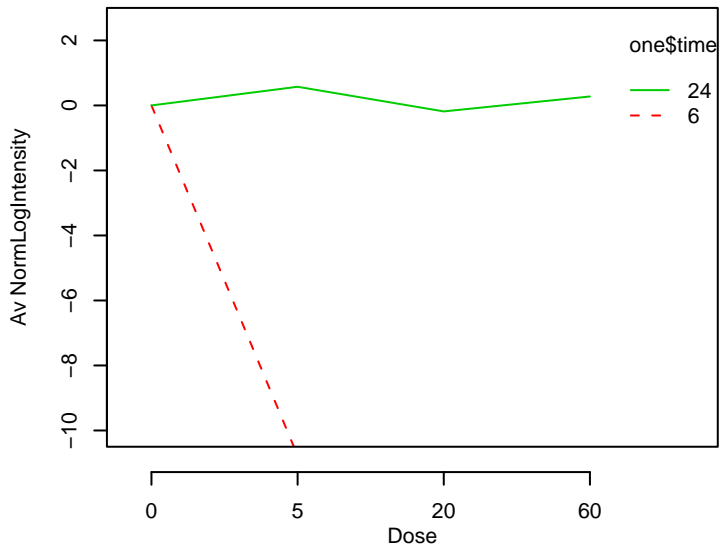

**GO\_0048729 : tissue morphogenesis**

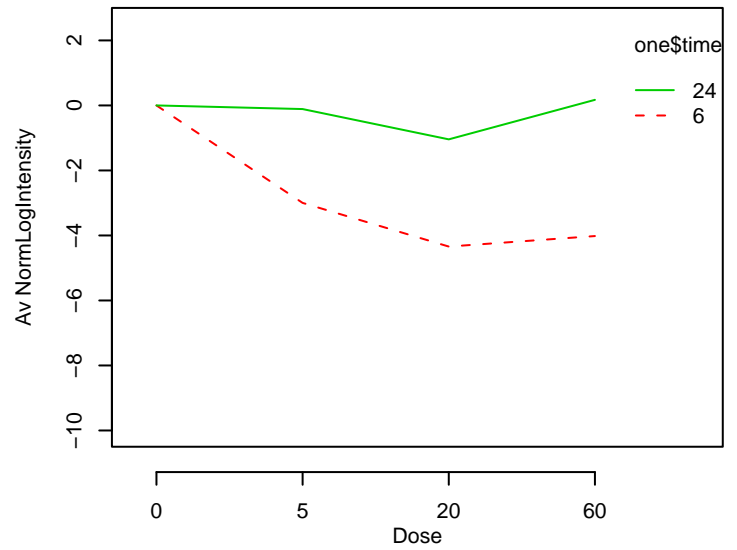

**GO\_0048730 : epidermis morphogenesis**

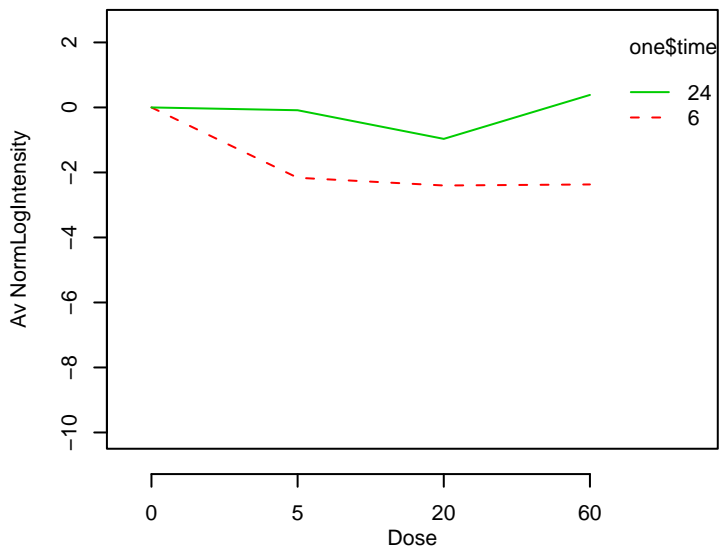

**GO\_0048732 : gland development**

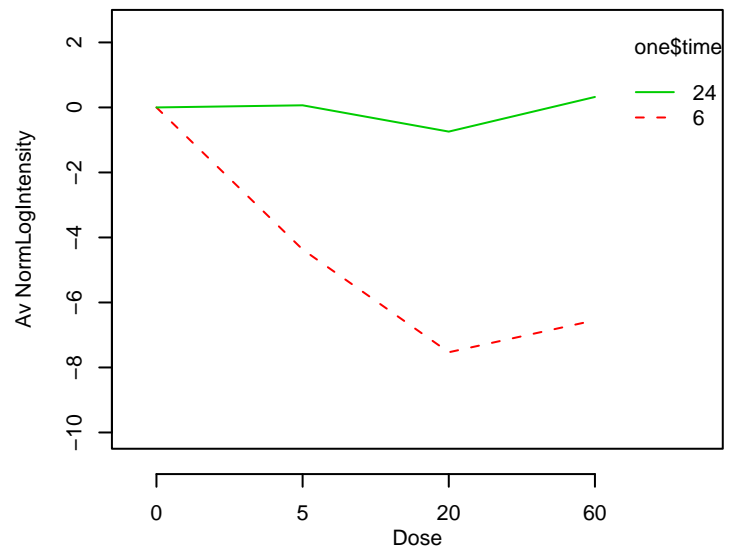

**GO\_0048736 : appendage development**

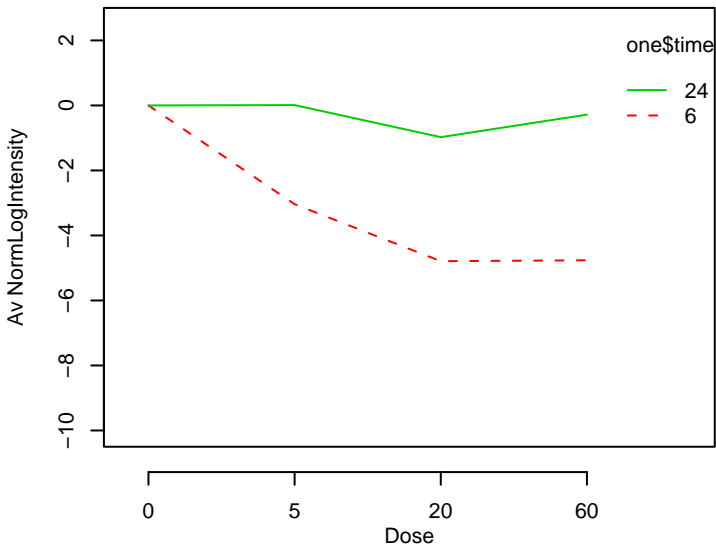

**GO\_0048738 : cardiac muscle development**

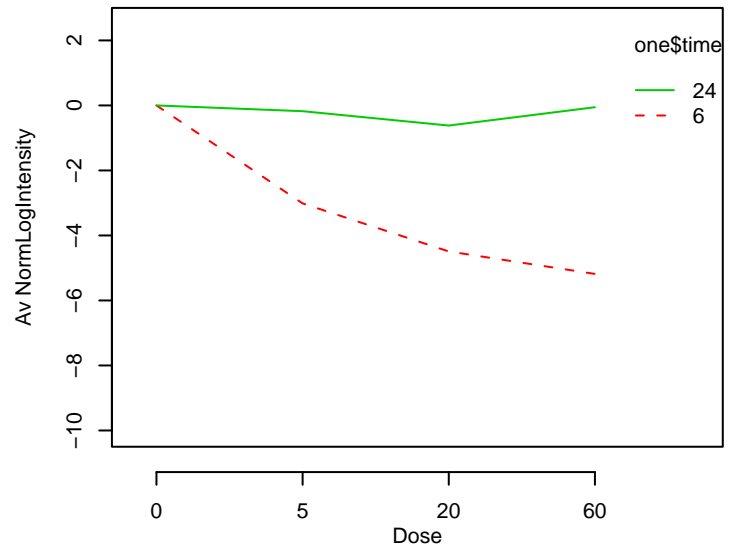

**GO\_0048741 : skeletal muscle fiber development**

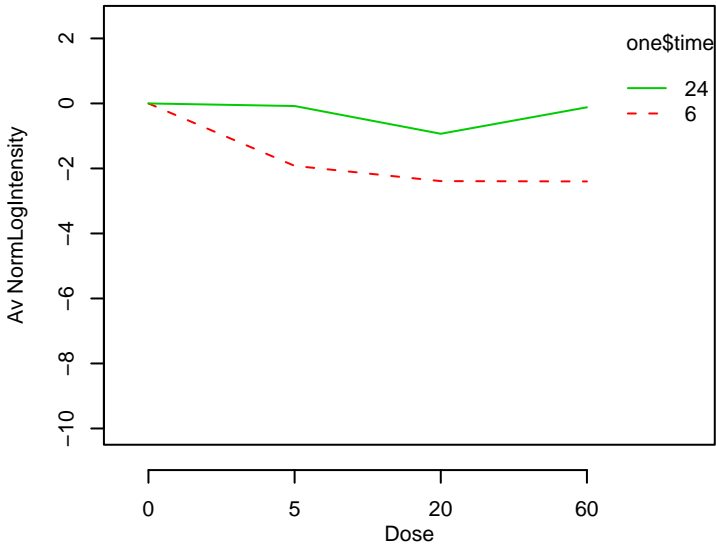

**GO\_0048747 : muscle fiber development**

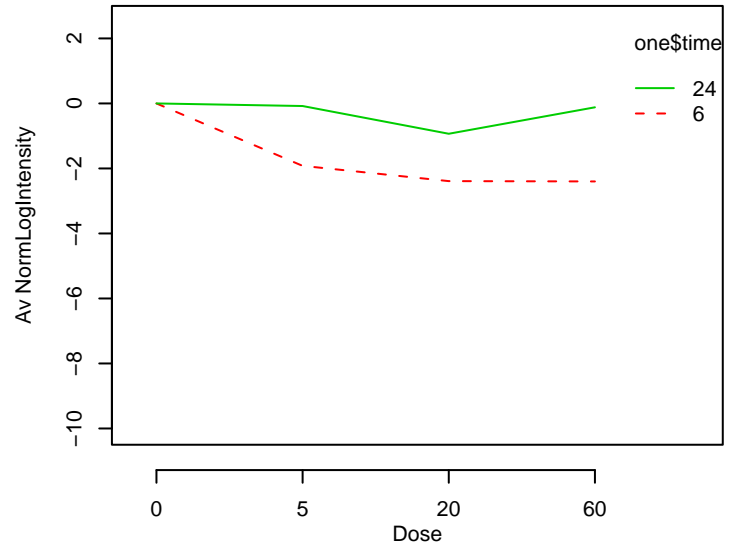

**GO\_0048754 : branching morphogenesis of a tube**

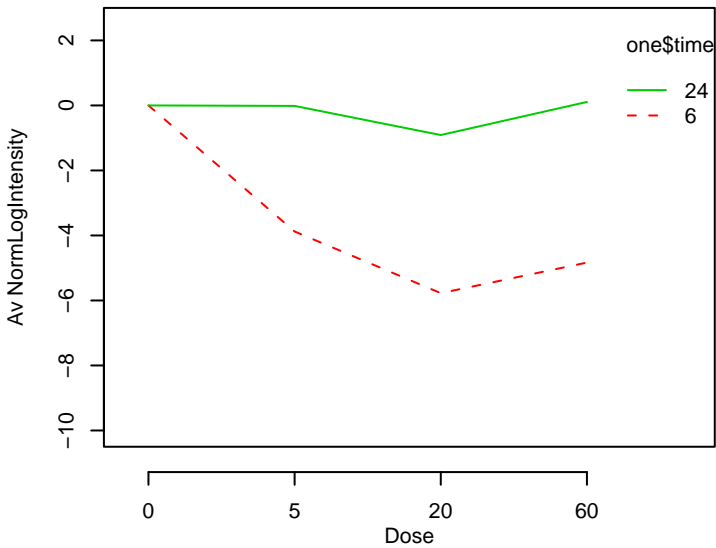

**GO\_0048762 : mesenchymal cell differentiation**

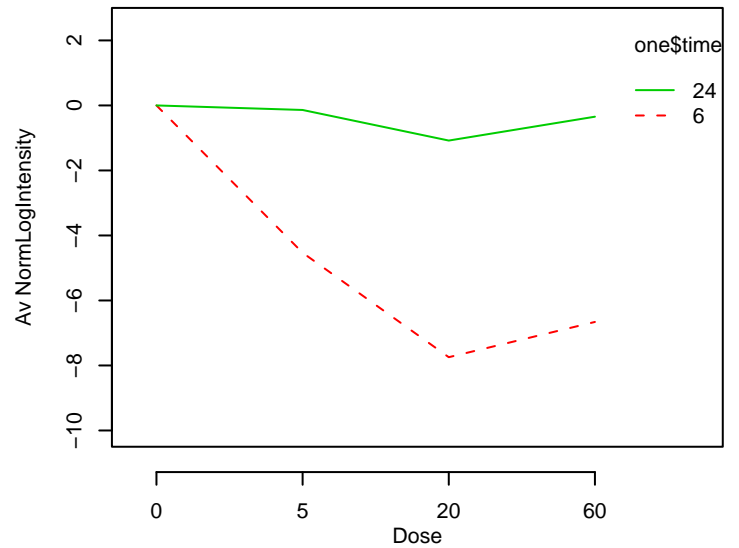



**GO\_0048771 : tissue remodeling**

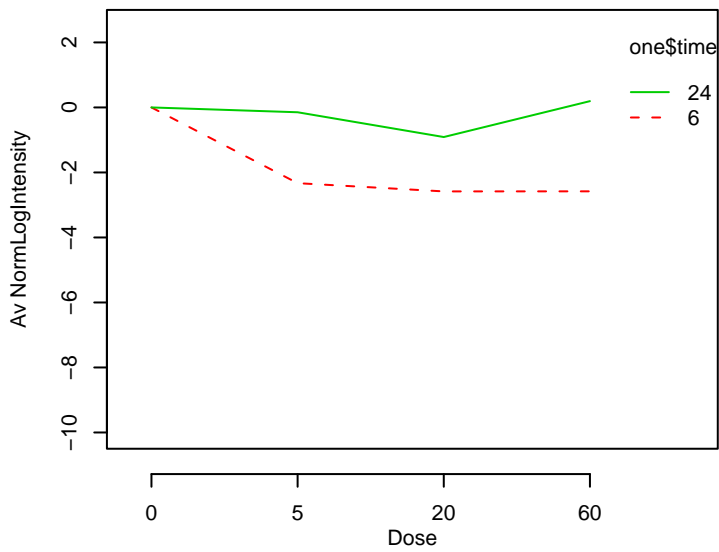

**GO\_0048806 : genitalia development**

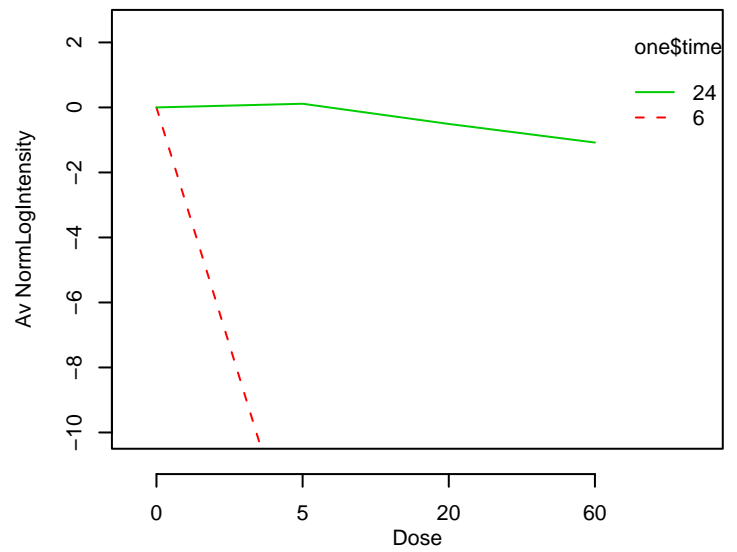

**GO\_0048812 : neurite morphogenesis**

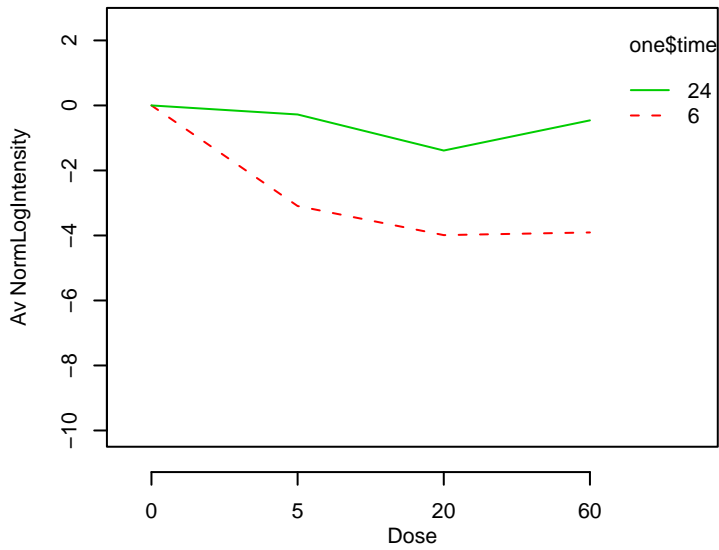

**GO\_0048820 : hair follicle maturation**

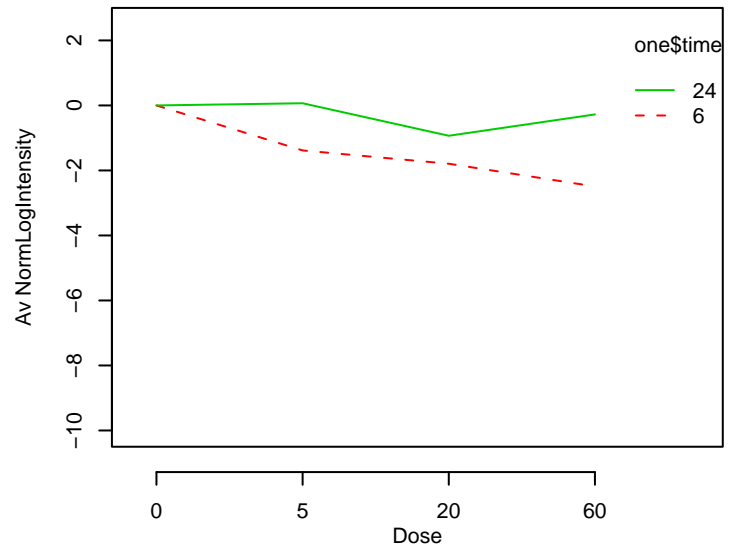

**GO\_0048839 : inner ear development**

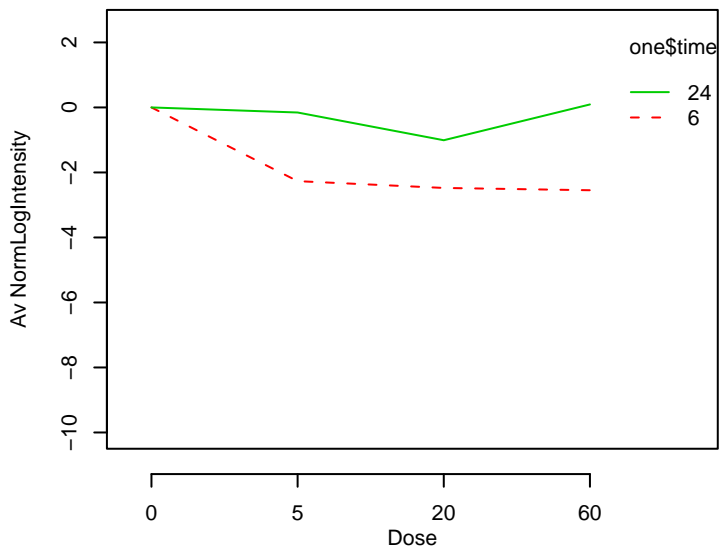

**GO\_0050435 : beta-amyloid metabolism**

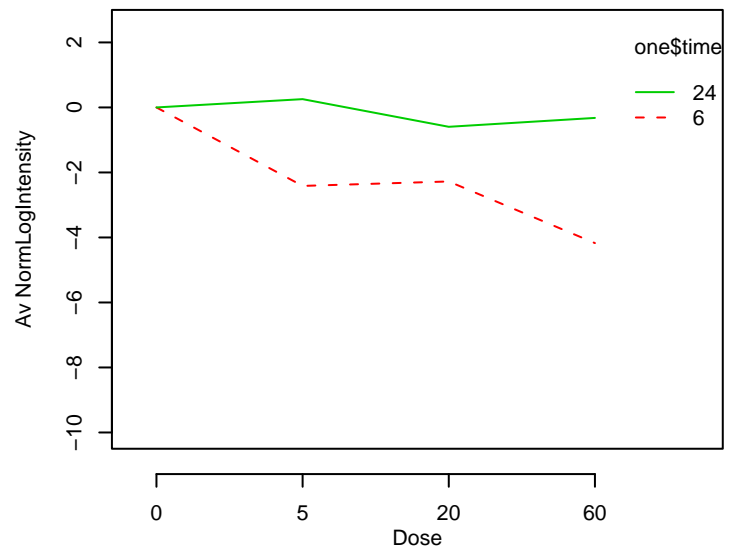

**GO\_0050650 : chondroitin sulfate proteoglycan biosynthes**

**GO\_0050654 : chondroitin sulfate proteoglycan metabolis**

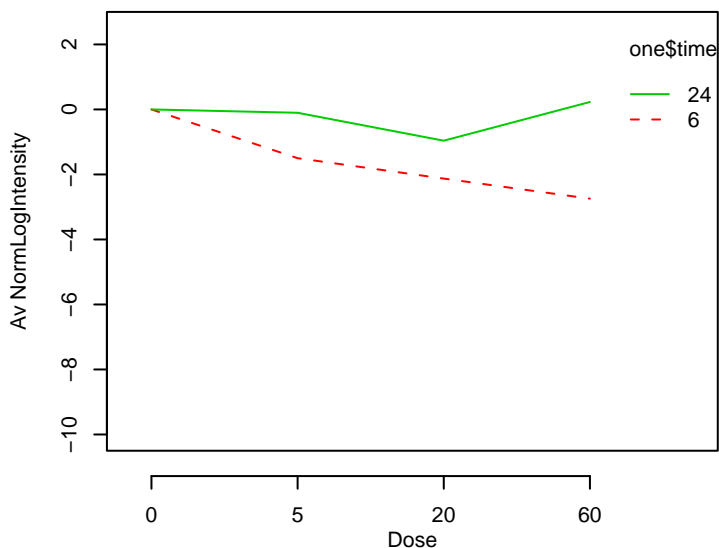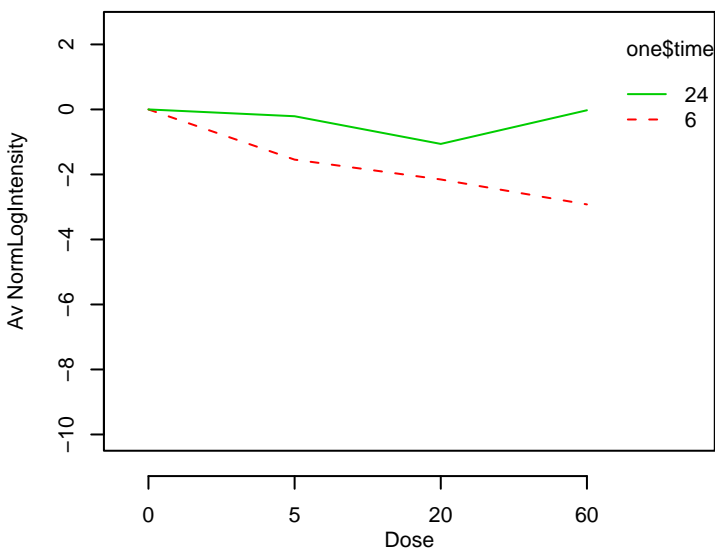

**GO\_0050657 : nucleic acid transport**

**GO\_0050658 : RNA transport**

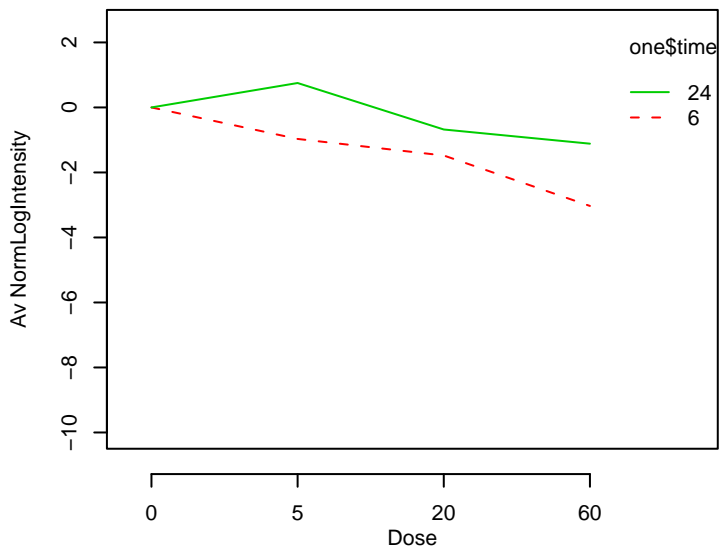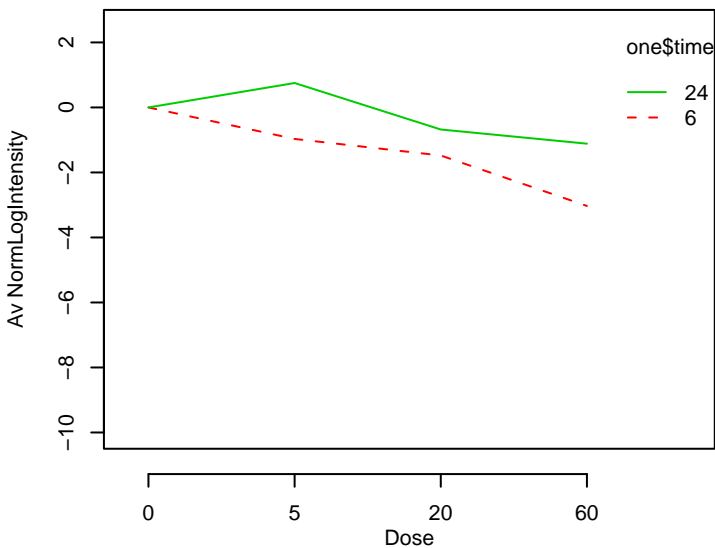

**GO\_0050663 : cytokine secretion**

**GO\_0050670 : regulation of lymphocyte proliferation**

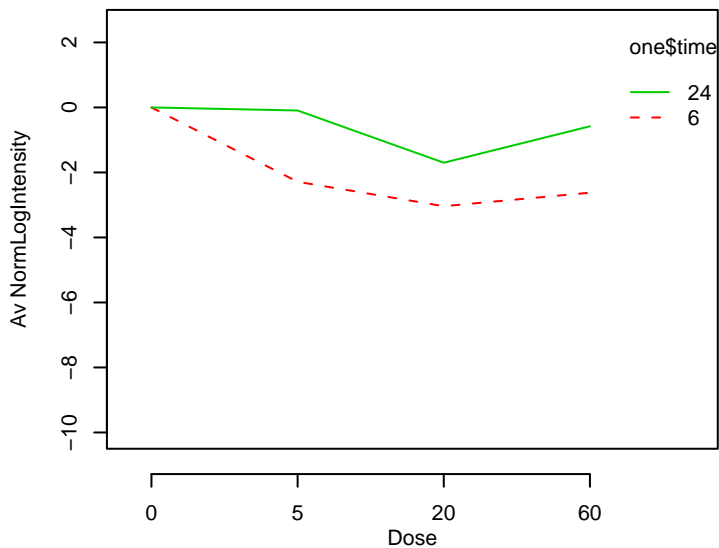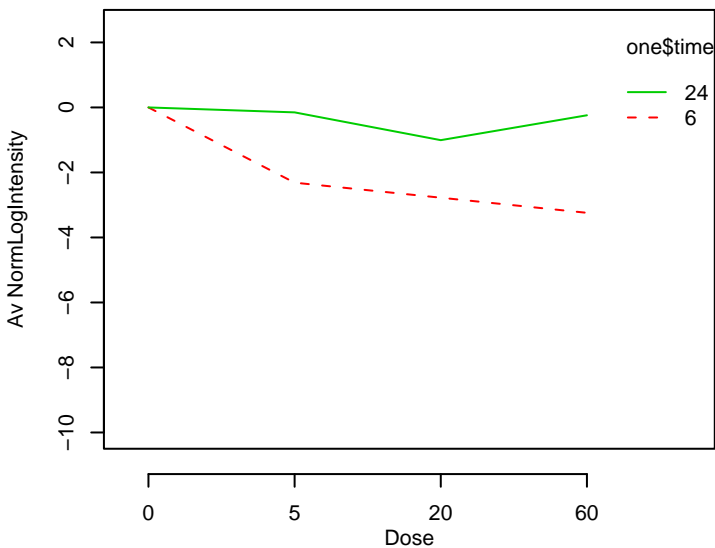

**GO\_0050671 : positive regulation of lymphocyte proliferati**    **GO\_0050672 : negative regulation of lymphocyte proliferati**

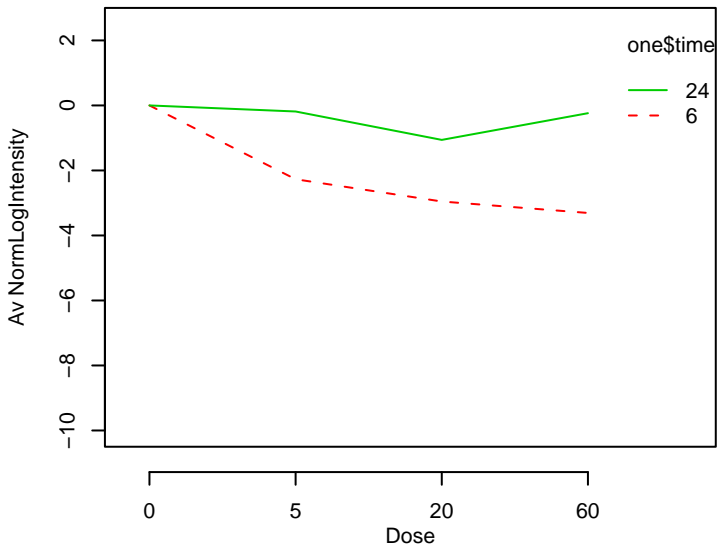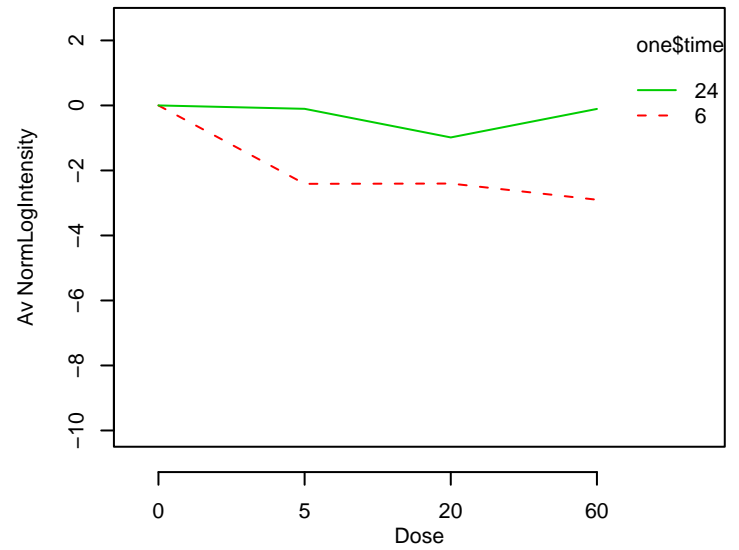

**GO\_0050673 : epithelial cell proliferation**

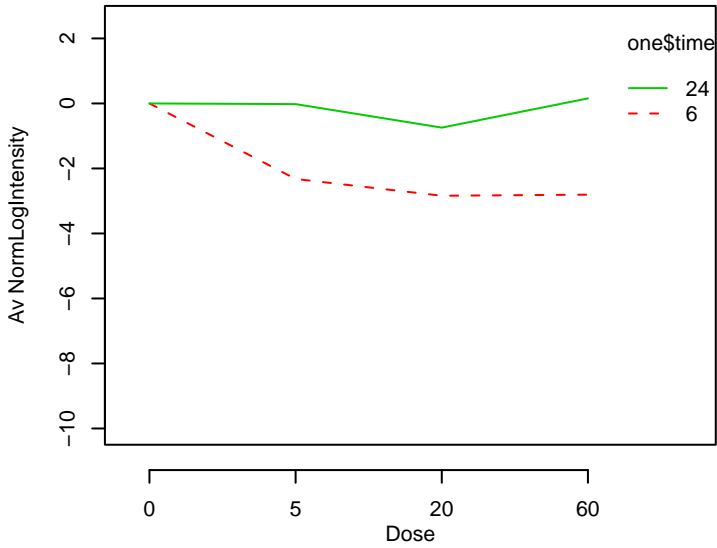

**GO\_0050678 : regulation of epithelial cell proliferation**

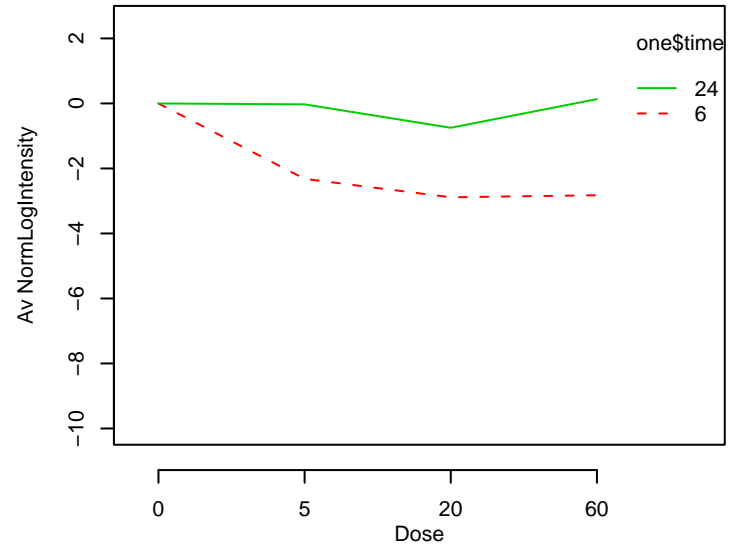

**GO\_0050679 : positive regulation of epithelial cell prolifera**

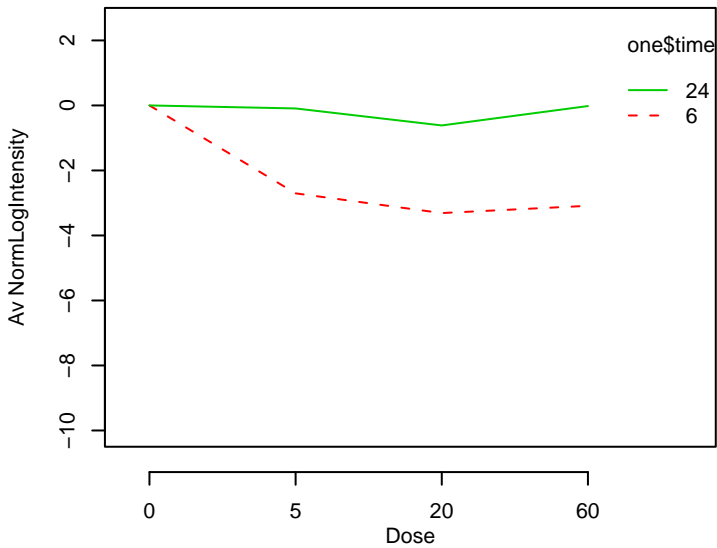

**GO\_0050684 : regulation of mRNA processing**

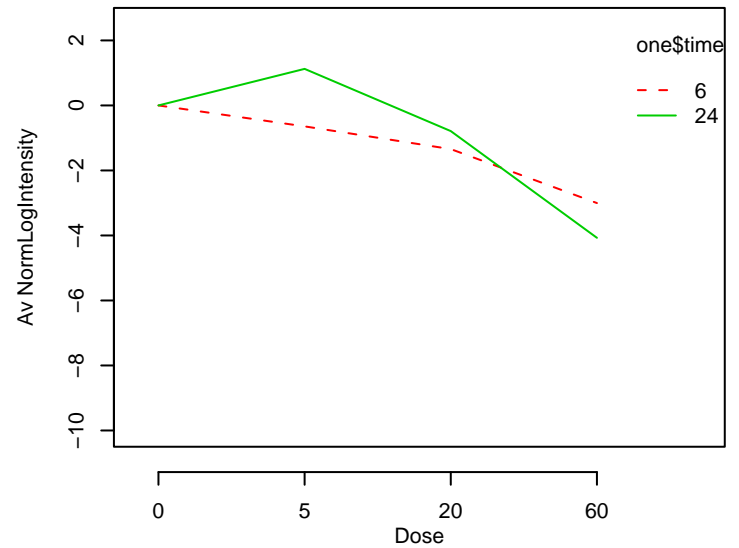

**GO\_0050701 : interleukin-1 secretion**

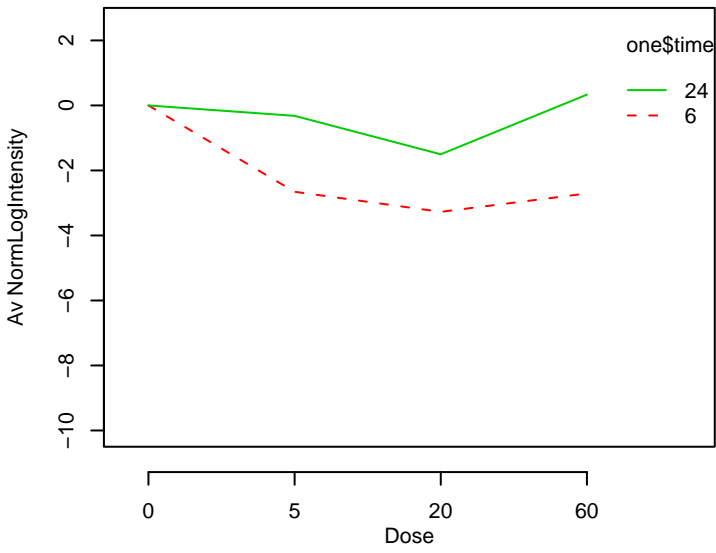

**GO\_0050702 : interleukin-1 beta secretion**

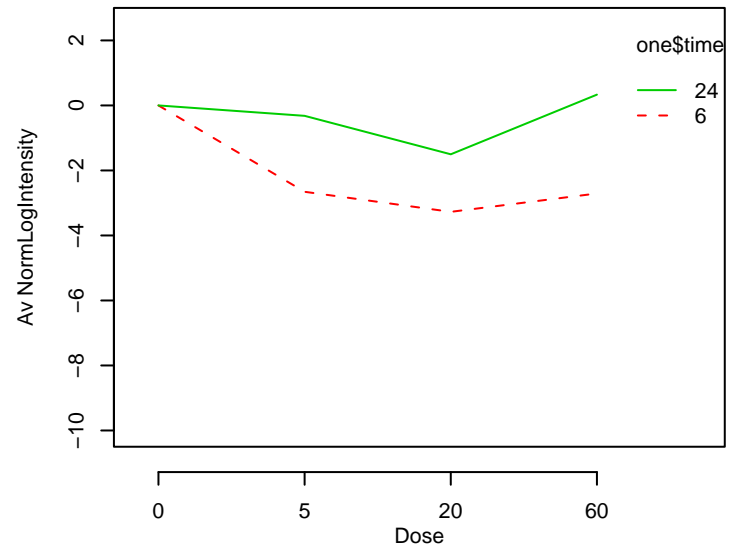

**GO\_0050704 : regulation of interleukin-1 secretion**

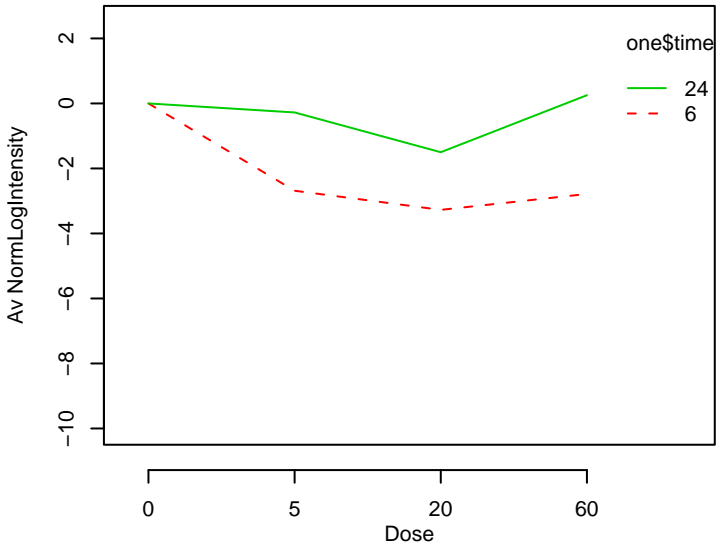

**GO\_0050706 : regulation of interleukin-1 beta secretion**

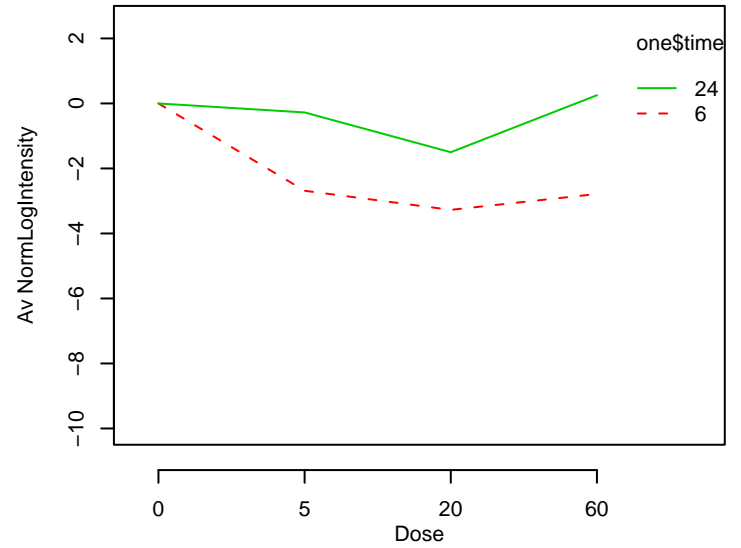

**GO\_0050707 : regulation of cytokine secretion**

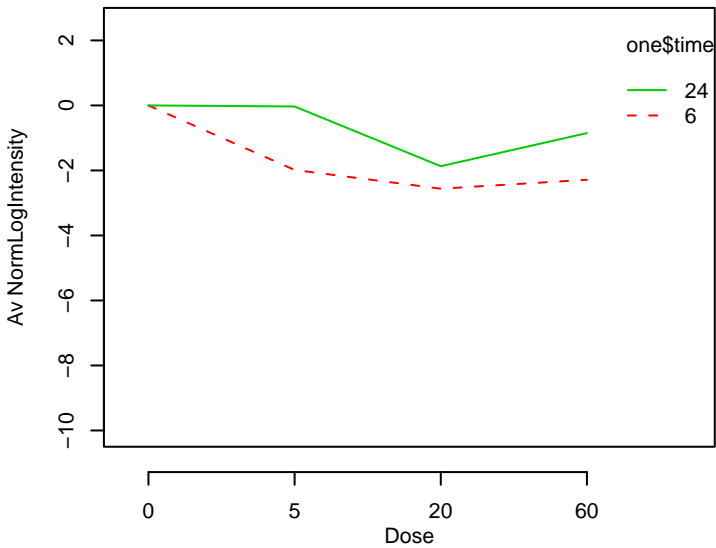

**GO\_0050708 : regulation of protein secretion**

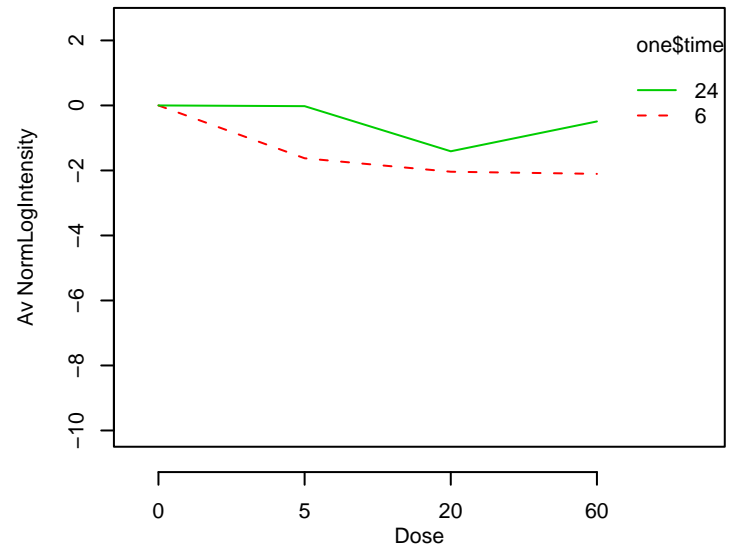

**GO\_0050714 : positive regulation of protein secretion**

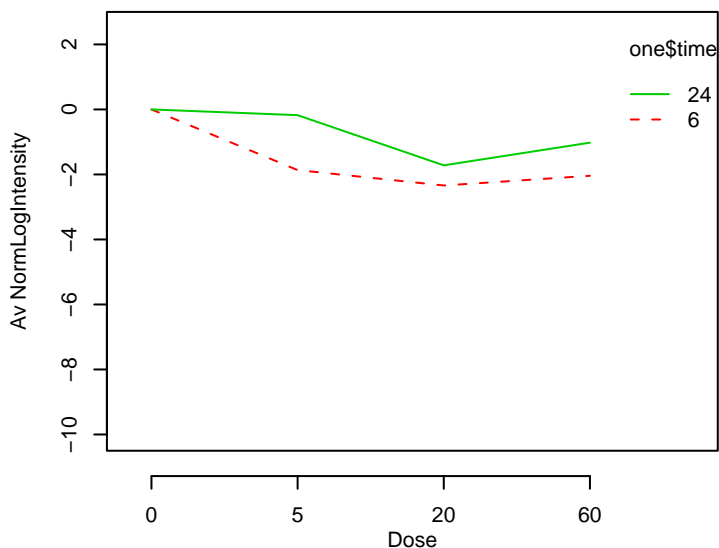

**GO\_0050715 : positive regulation of cytokine secretion**

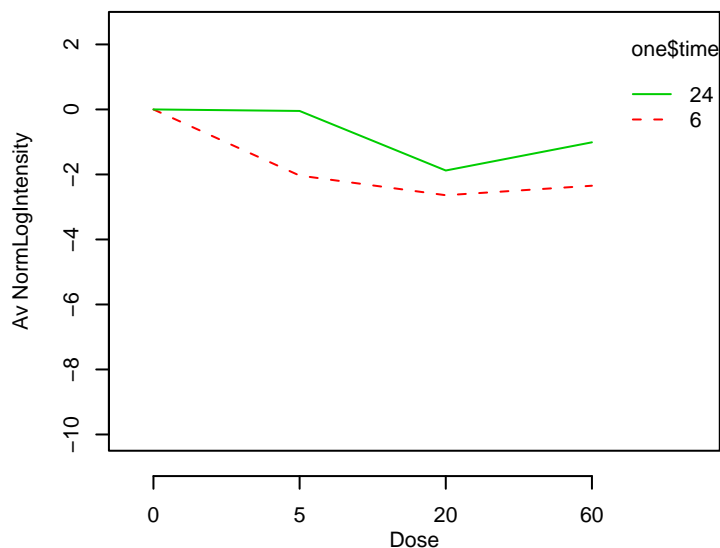

**GO\_0050716 : positive regulation of interleukin-1 secretion**      **GO\_0050718 : positive regulation of interleukin-1 beta secretion**

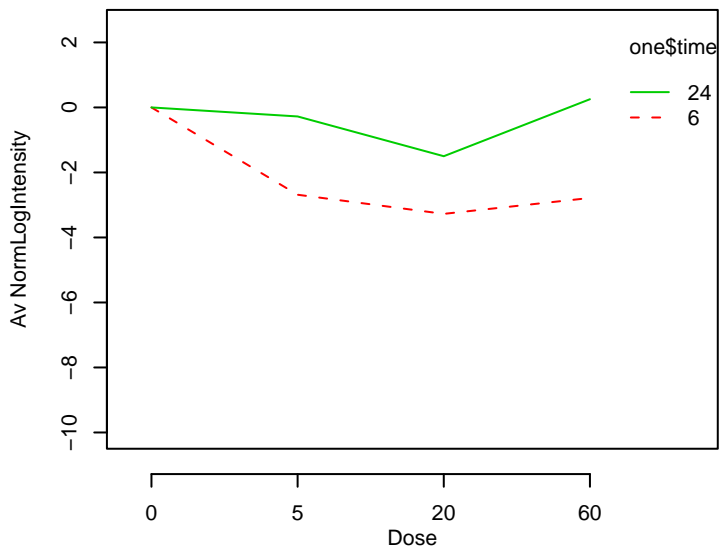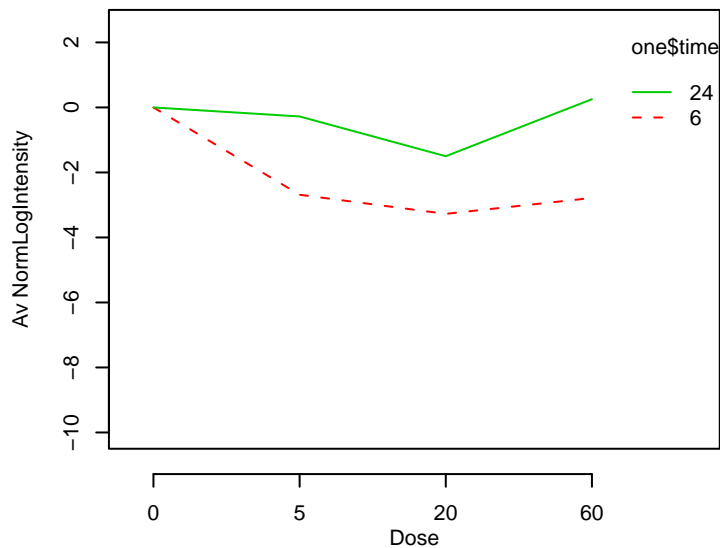

**GO\_0050727 : regulation of inflammatory response**

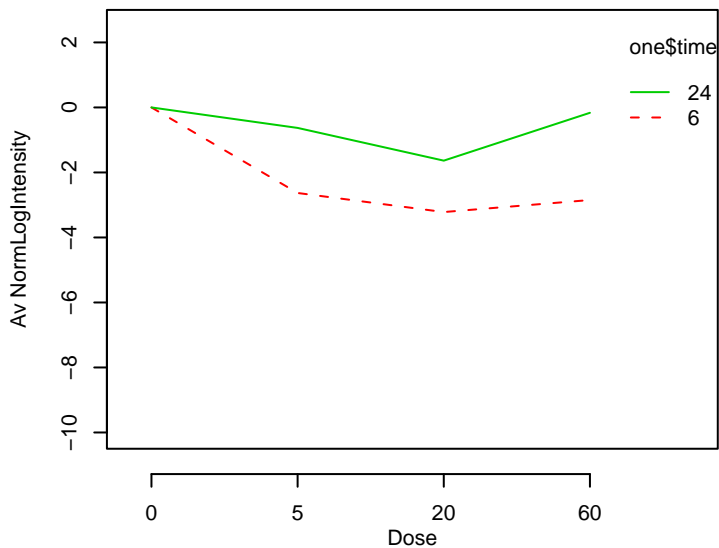

**GO\_0050728 : negative regulation of inflammatory response**

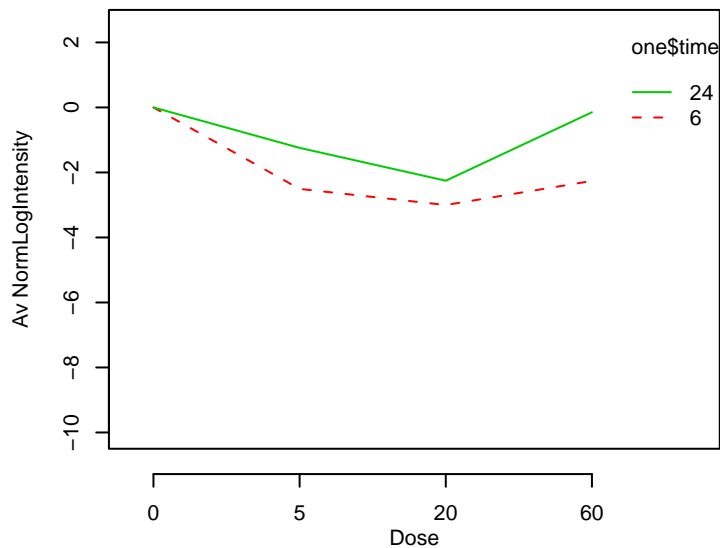

**GO\_0050729 : positive regulation of inflammatory respons** **GO\_0050730 : regulation of peptidyl-tyrosine phosphorylati**

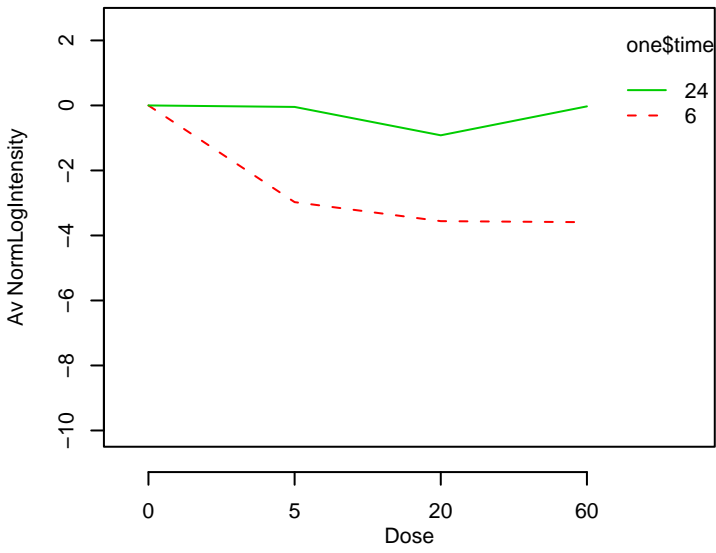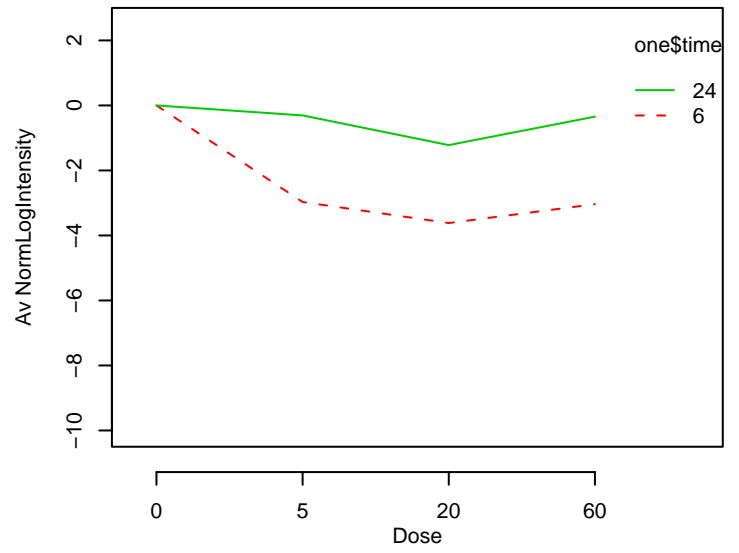

**GO\_0050731 : positive regulation of peptidyl-tyrosine phosph**

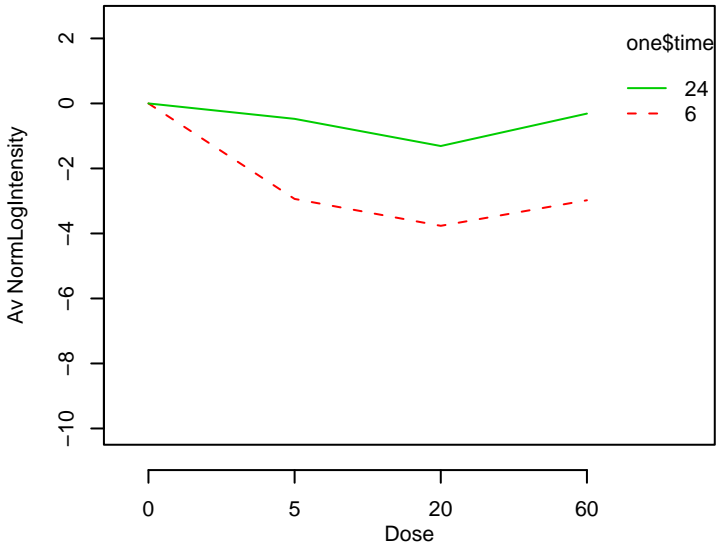

**GO\_0050755 : chemokine metabolism**

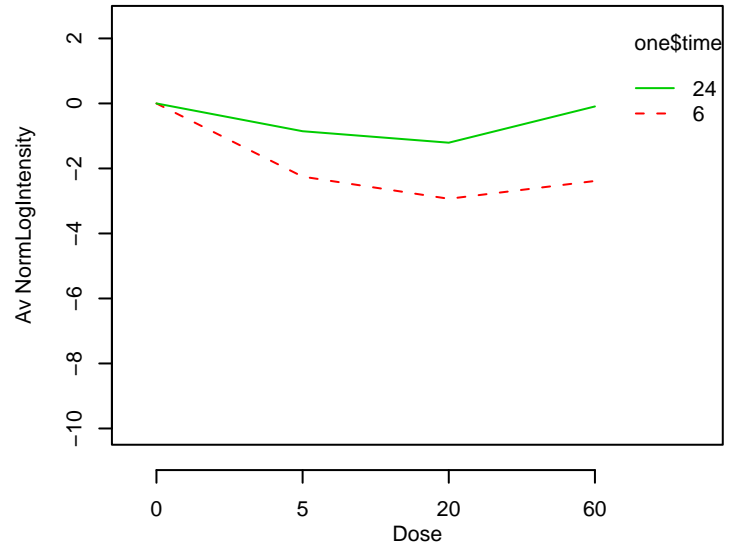

**GO\_0050764 : regulation of phagocytosis**

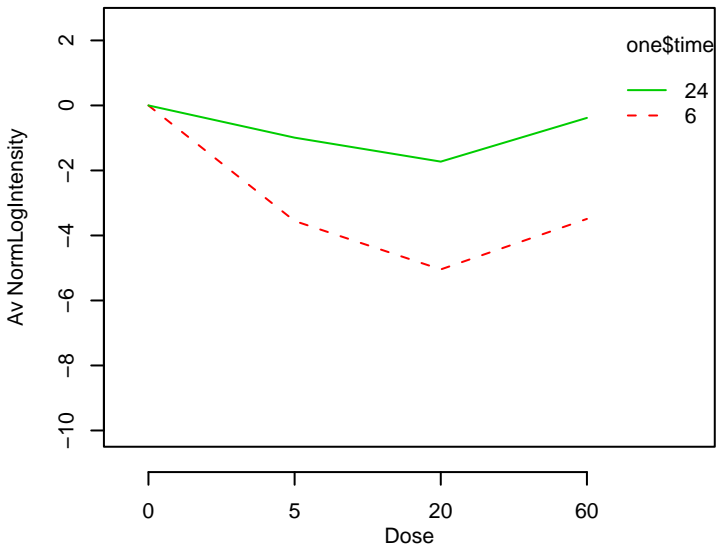

**GO\_0050766 : positive regulation of phagocytosis**

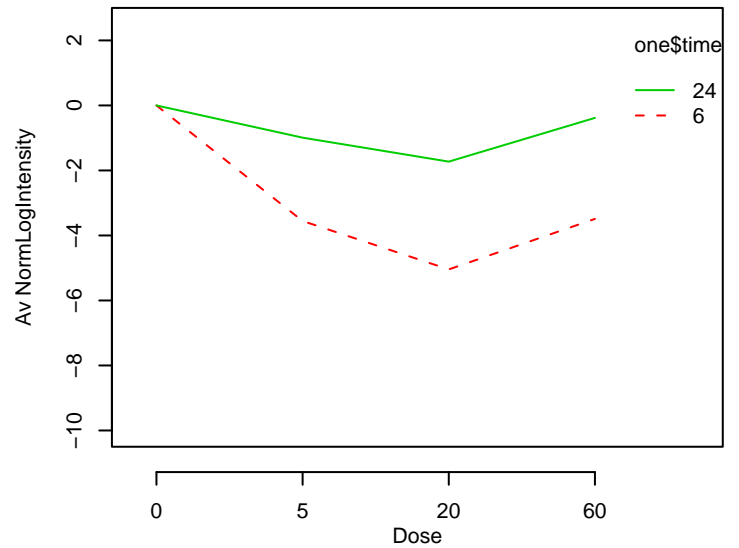

**GO\_0050767 : regulation of neurogenesis**

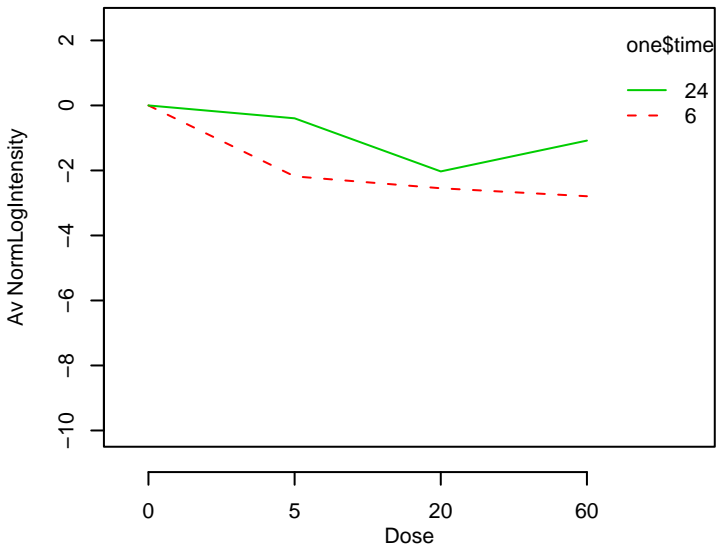

**GO\_0050768 : negative regulation of neurogenesis**

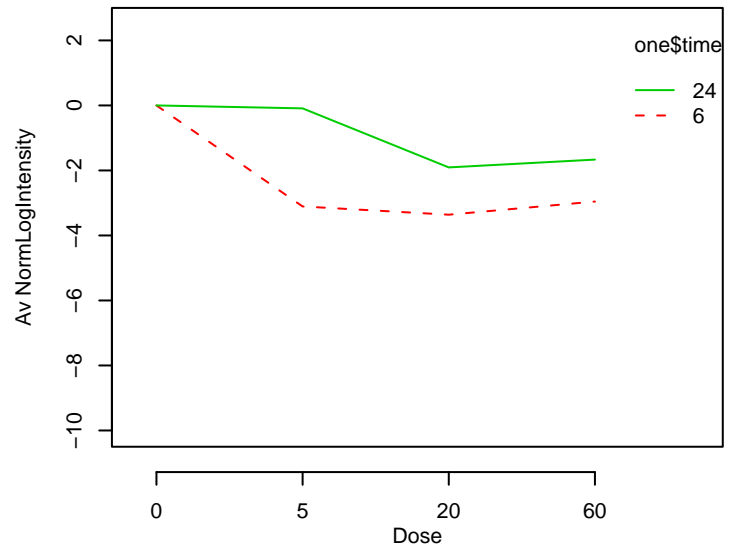

**GO\_0050769 : positive regulation of neurogenesis**

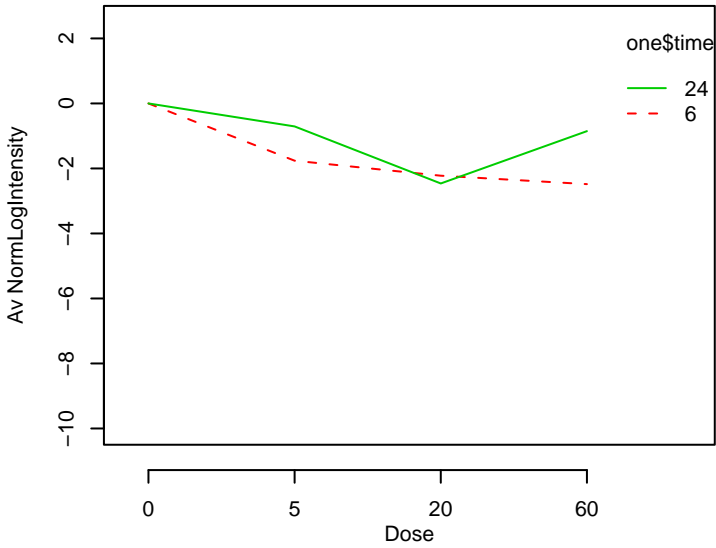

**GO\_0050770 : regulation of axonogenesis**

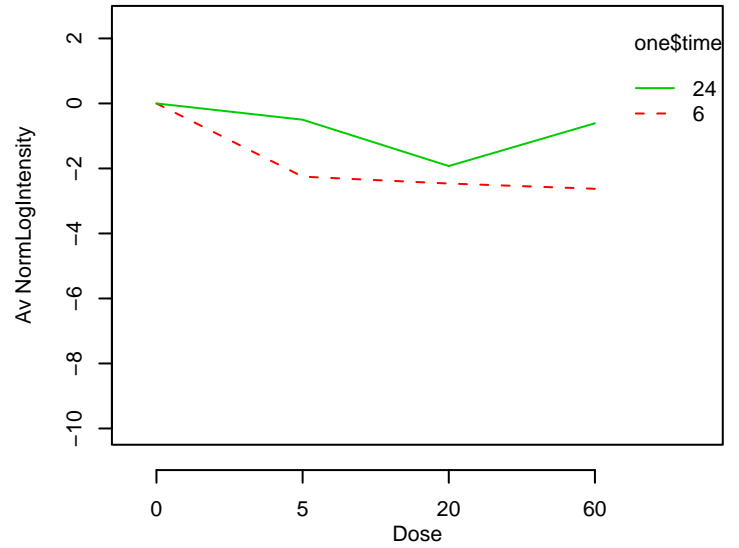

**GO\_0050771 : negative regulation of axonogenesis**

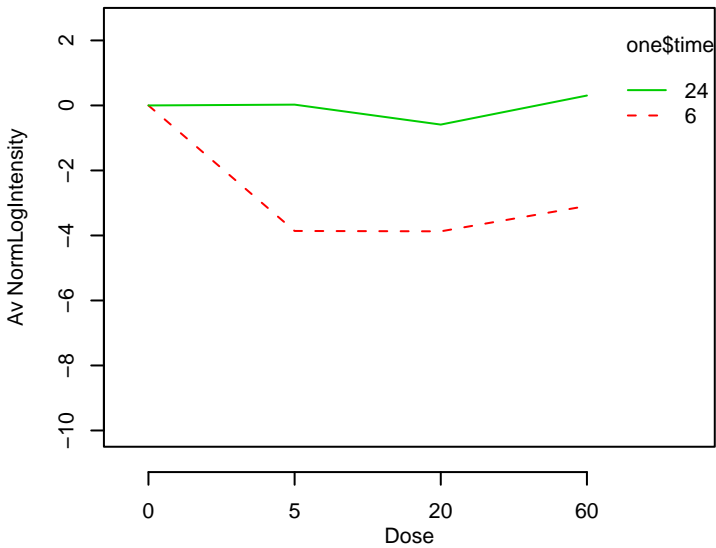

**GO\_0050772 : positive regulation of axonogenesis**

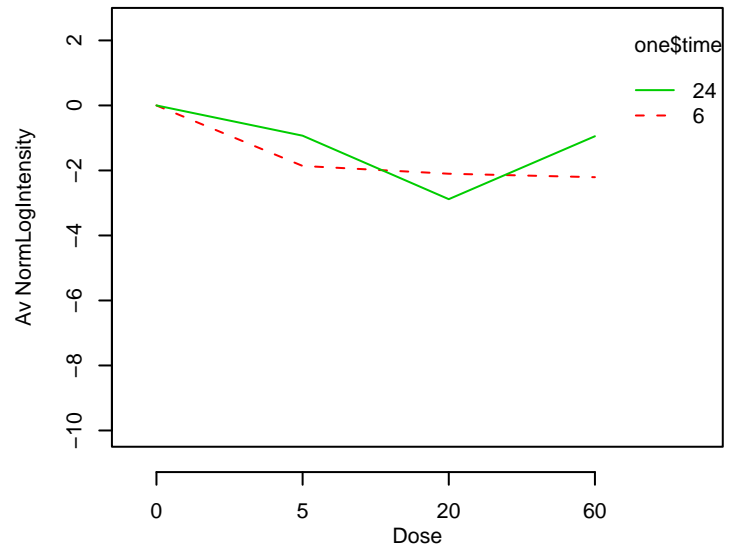

**GO\_0050776 : regulation of immune response**

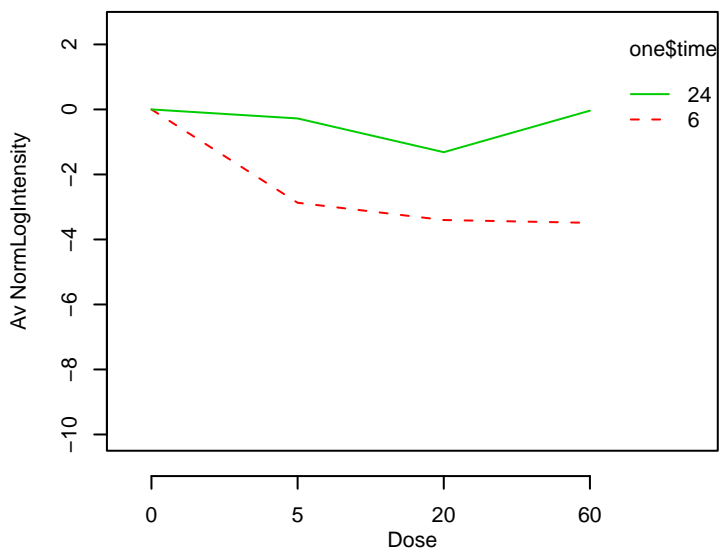

**GO\_0050777 : negative regulation of immune response**

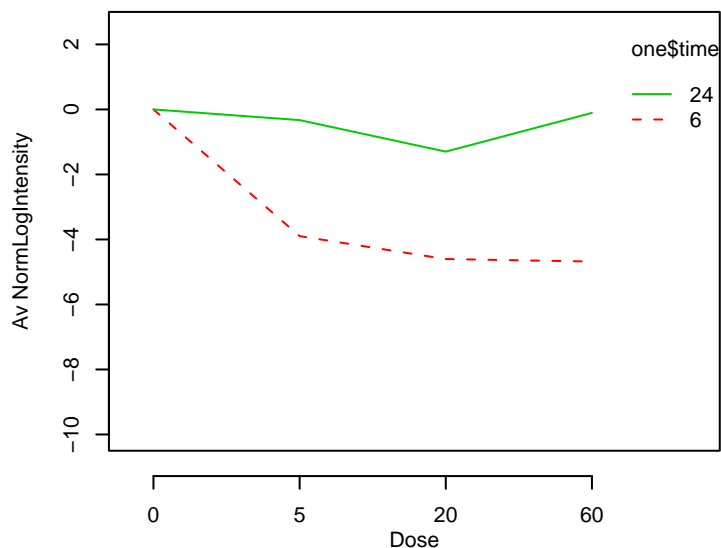

**GO\_0050778 : positive regulation of immune response**

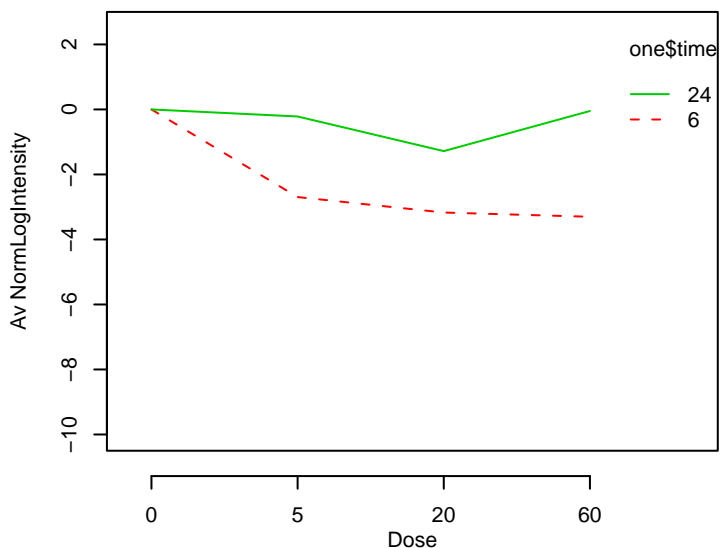

**GO\_0050792 : regulation of viral life cycle**

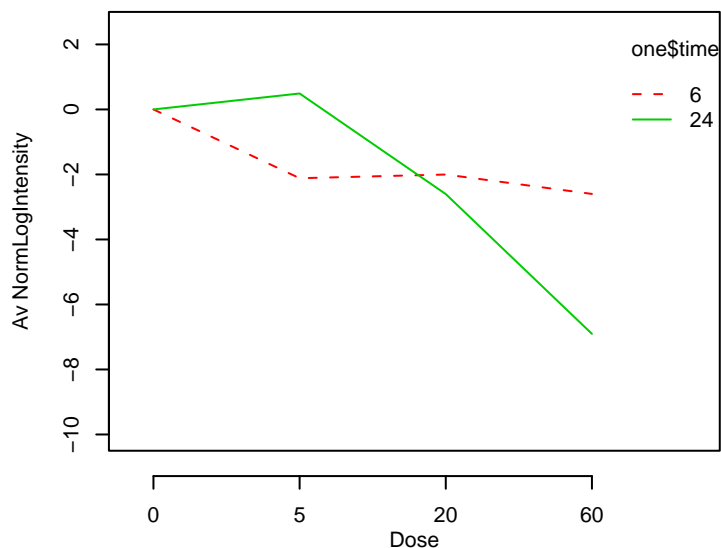

**GO\_0050793 : regulation of development**

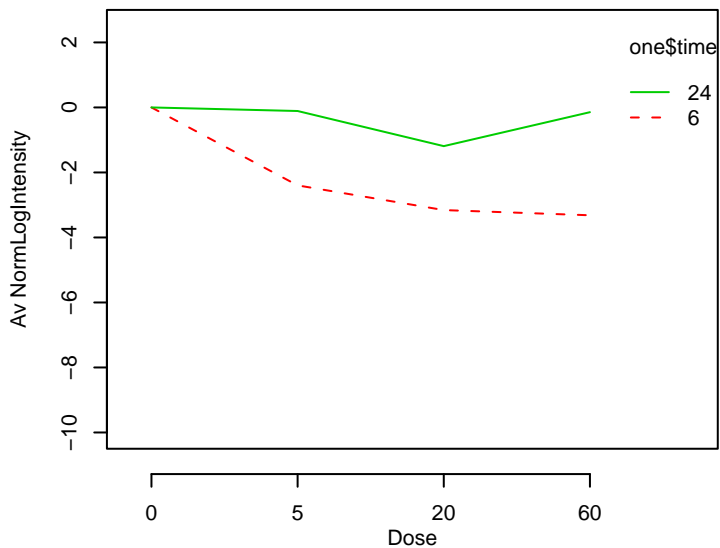

**GO\_0050796 : regulation of insulin secretion**

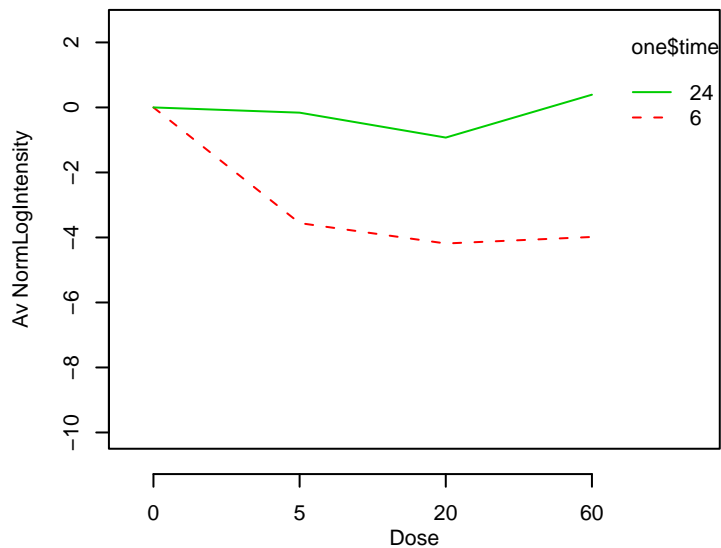



**GO\_0050798 : activated T cell proliferation**

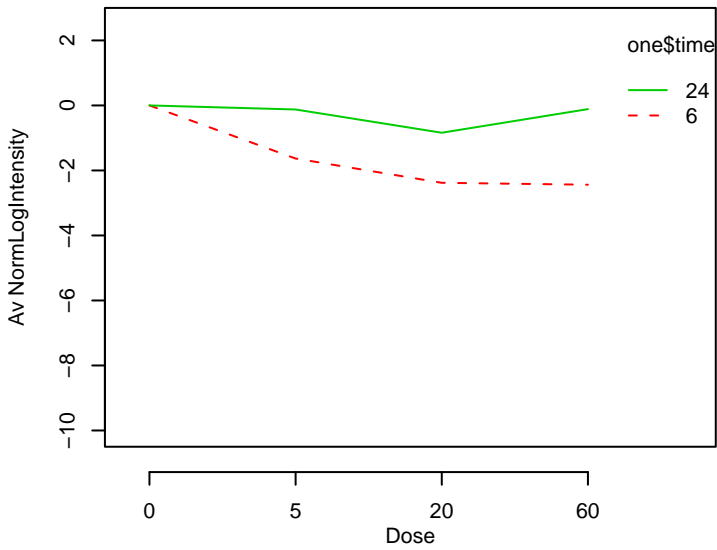

**GO\_0050801 : ion homeostasis**

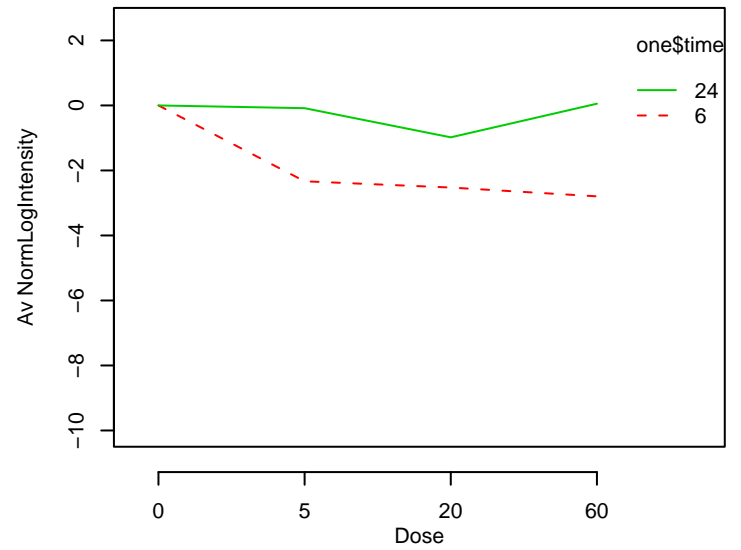

**GO\_0050803 : regulation of synapse structure and functio**

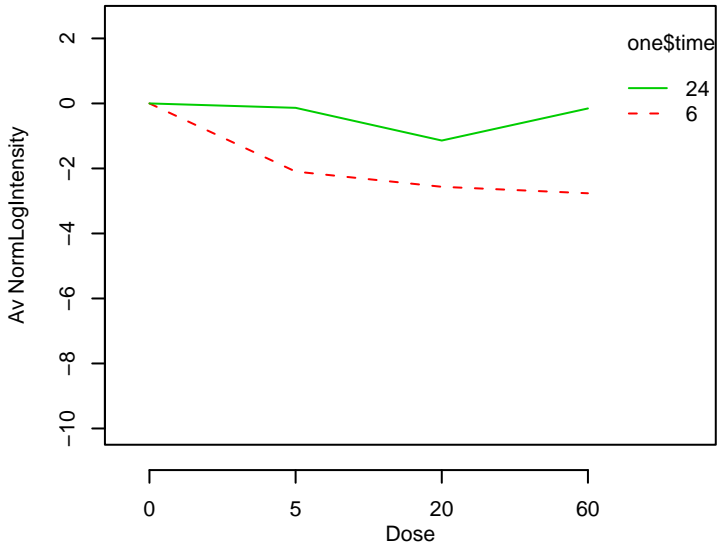

**GO\_0050804 : regulation of synaptic transmission**

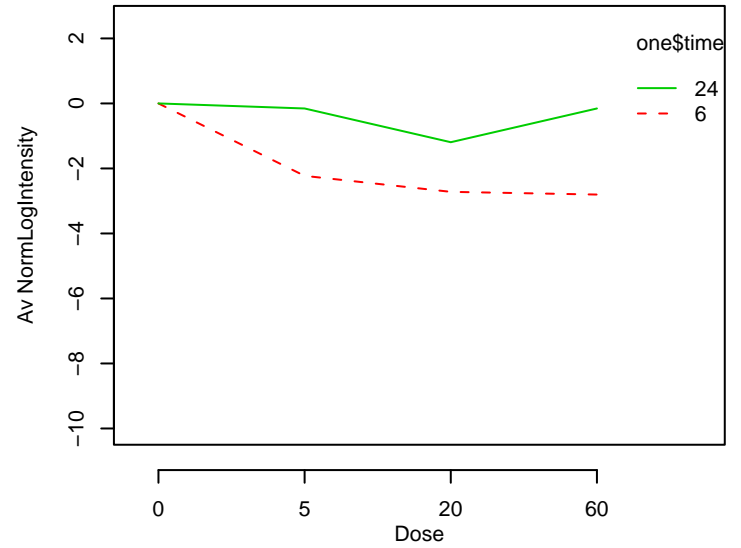

**GO\_0050808 : synapse organization and biogenesis**

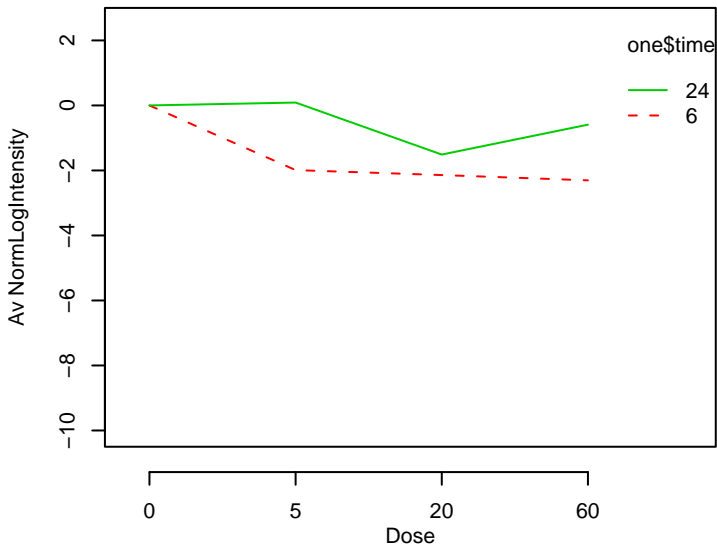

**GO\_0050810 : regulation of steroid biosynthesis**

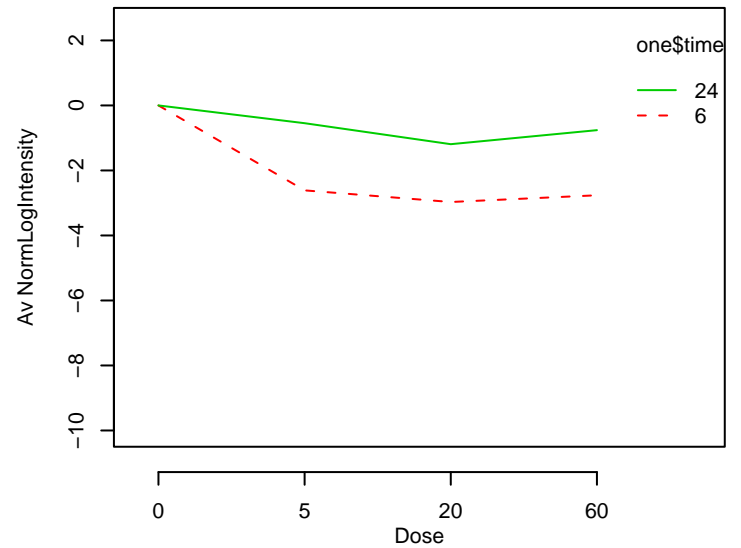

**GO\_0050817 : coagulation**

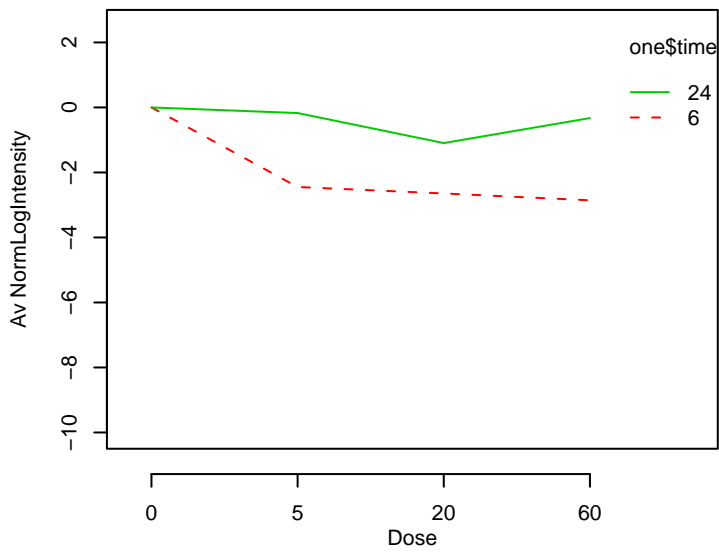

**GO\_0050818 : regulation of coagulation**

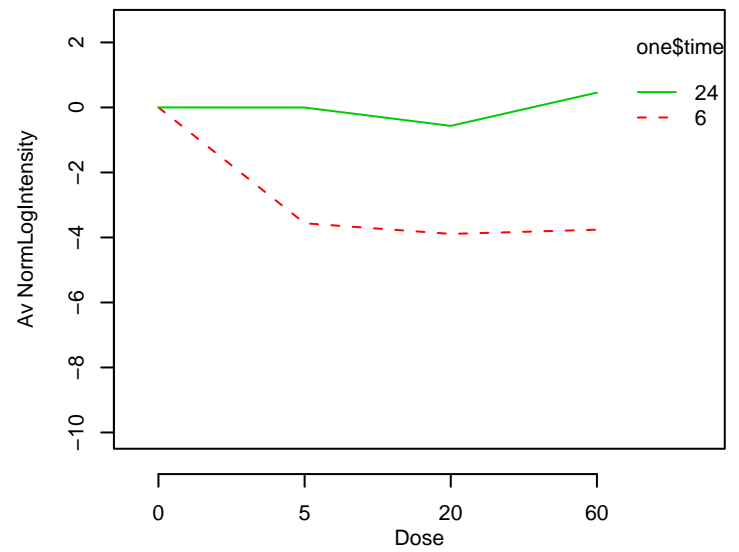

**GO\_0050819 : negative regulation of coagulation**

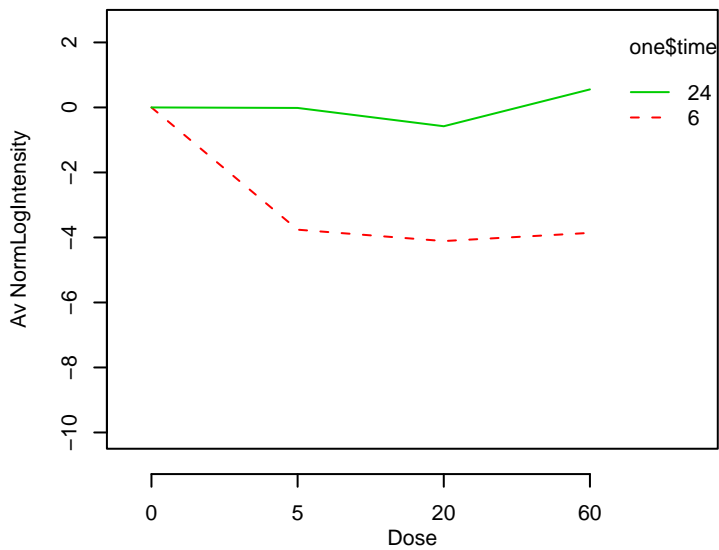

**GO\_0050821 : protein stabilization**

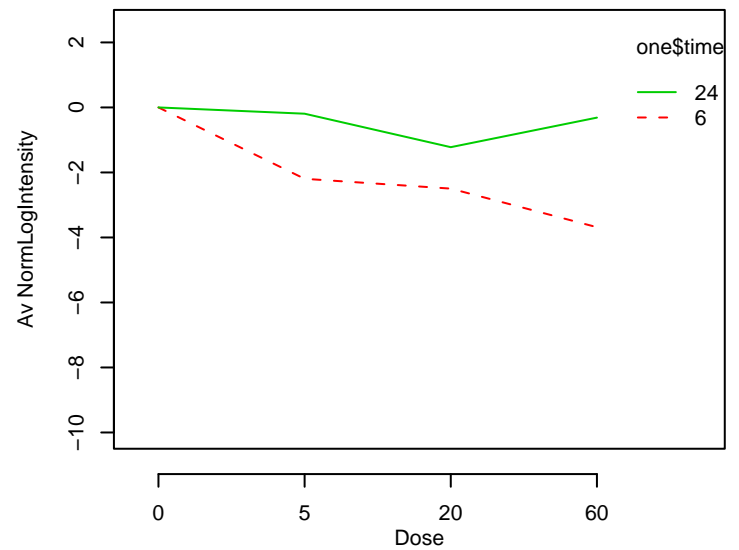

**GO\_0050830 : defense response to Gram-positive bacteriu**

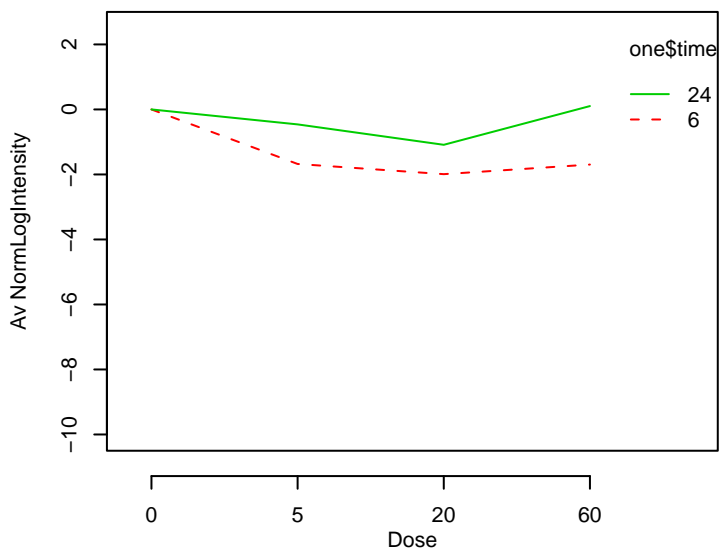

**GO\_0050832 : defense response to fungus**

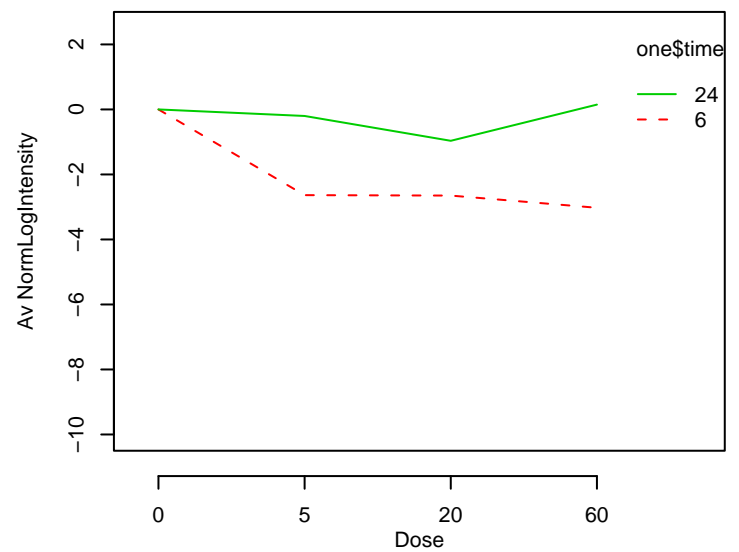

**GO\_0050848 : regulation of calcium-mediated signaling** **GO\_0050850 : positive regulation of calcium-mediated signa**

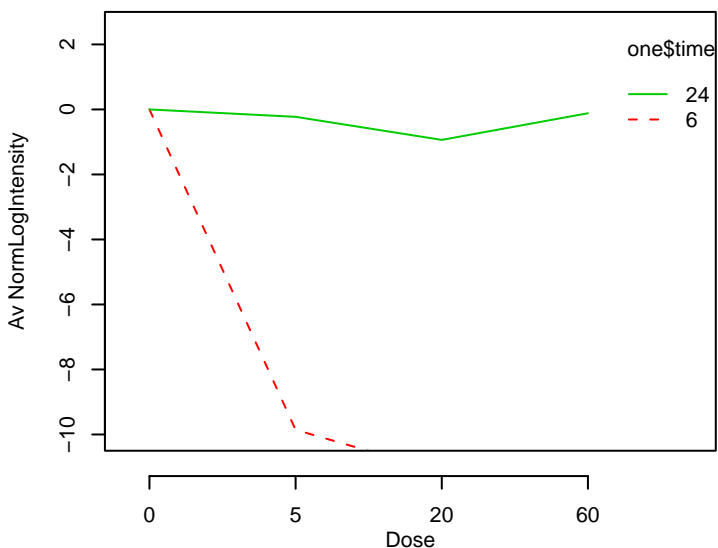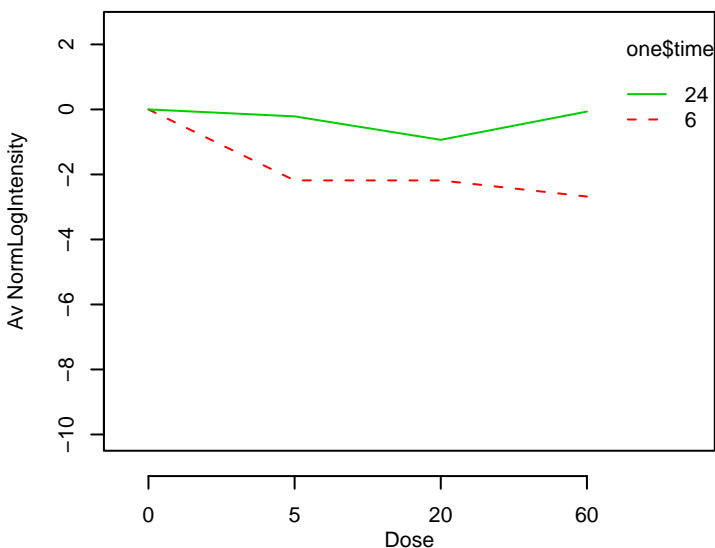

**GO\_0050851 : antigen receptor-mediated signaling pathwa**

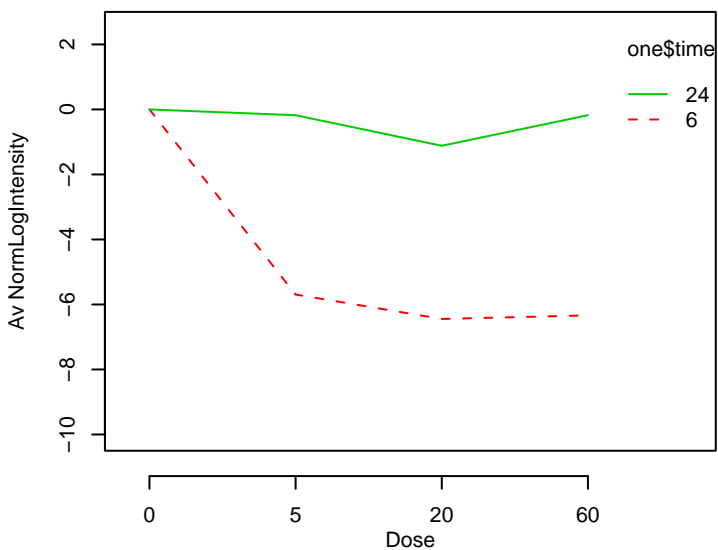

**GO\_0050852 : T cell receptor signaling pathway**

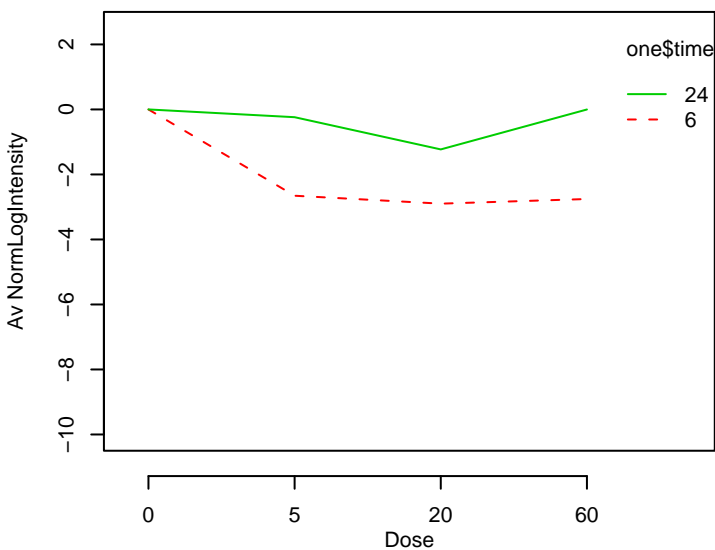

**GO\_0050853 : B cell receptor signaling pathway**

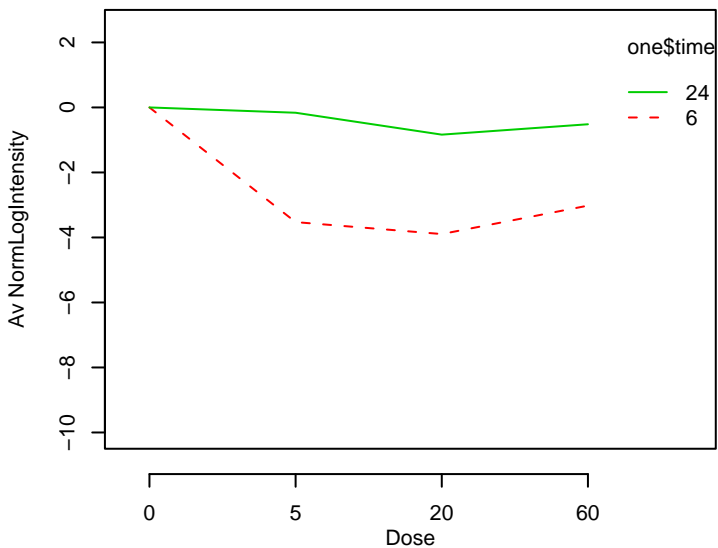

**GO\_0050854 : regulation of antigen receptor-mediated signa**

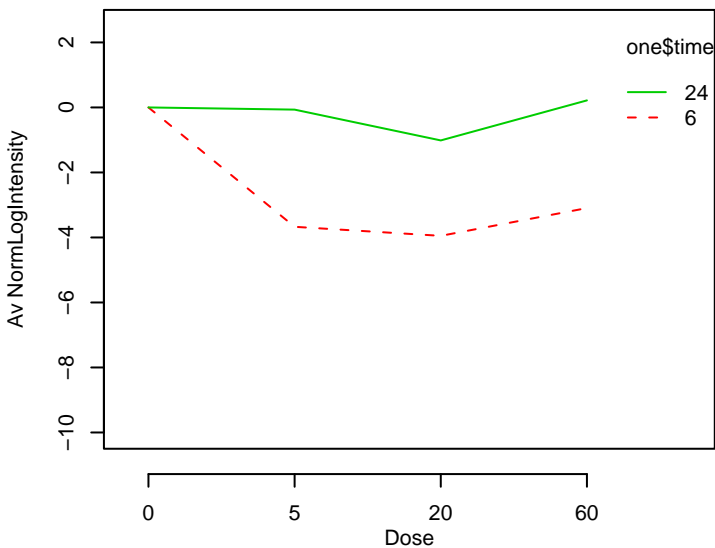

**GO\_0050856 : regulation of T cell receptor signaling pathway** **GO\_0050858 : negative regulation of antigen receptor-mediated**

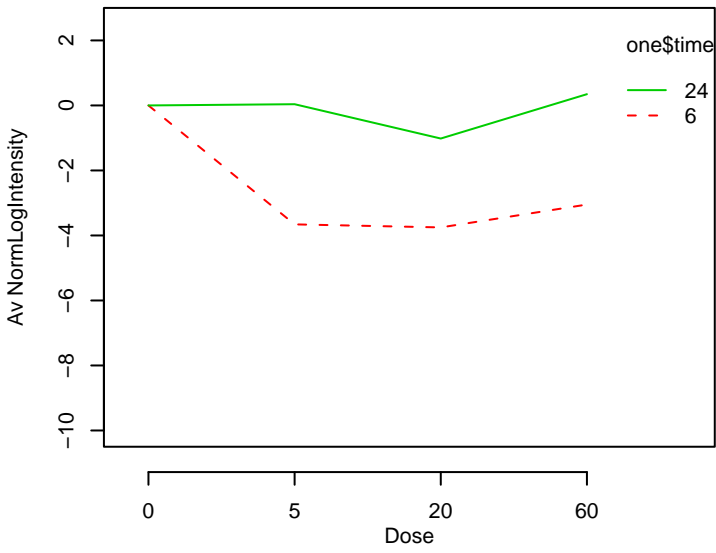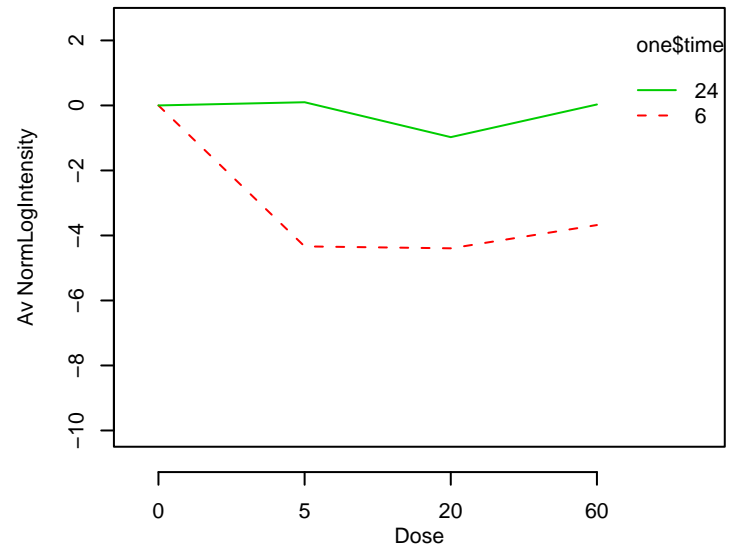

**GO\_0050860 : negative regulation of T cell receptor signaling**

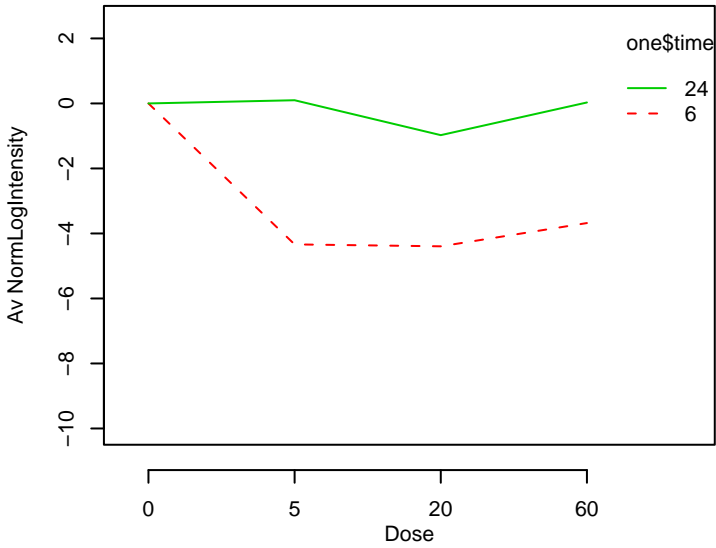

**GO\_0050863 : regulation of T cell activation**

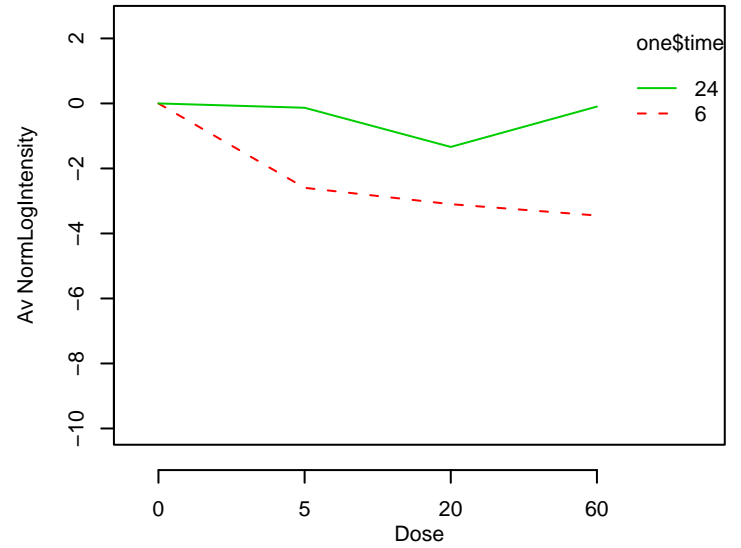

**GO\_0050864 : regulation of B cell activation**

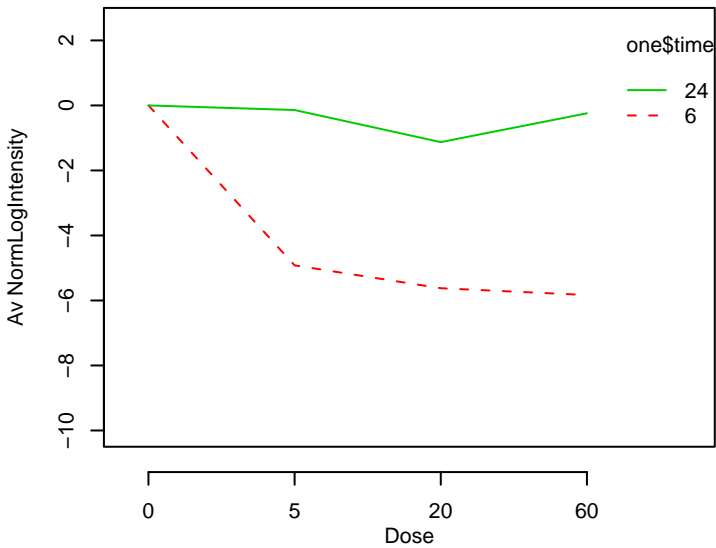

**GO\_0050865 : regulation of cell activation**

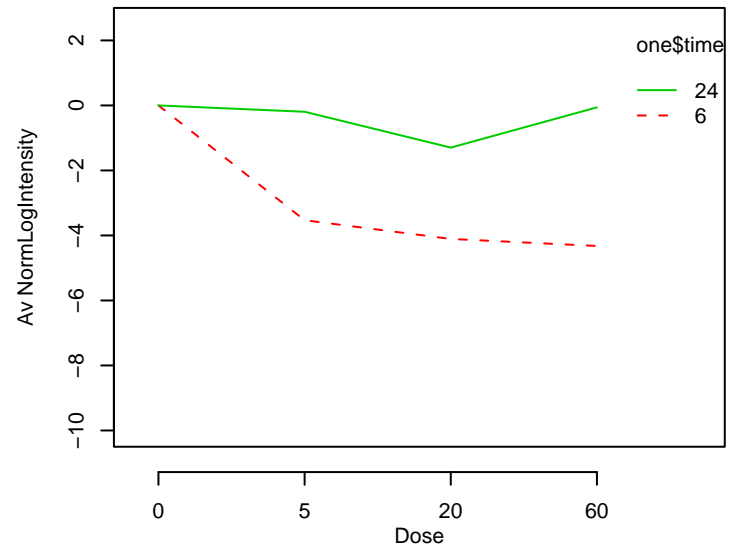

**GO\_0050866 : negative regulation of cell activation**

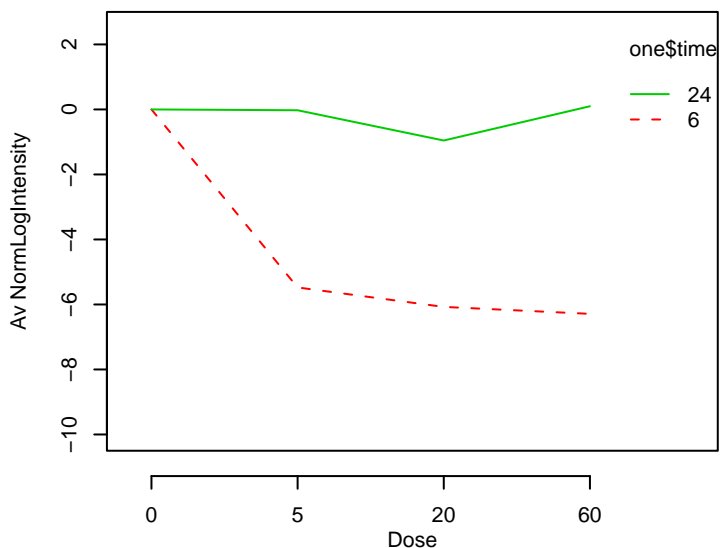

**GO\_0050867 : positive regulation of cell activation**

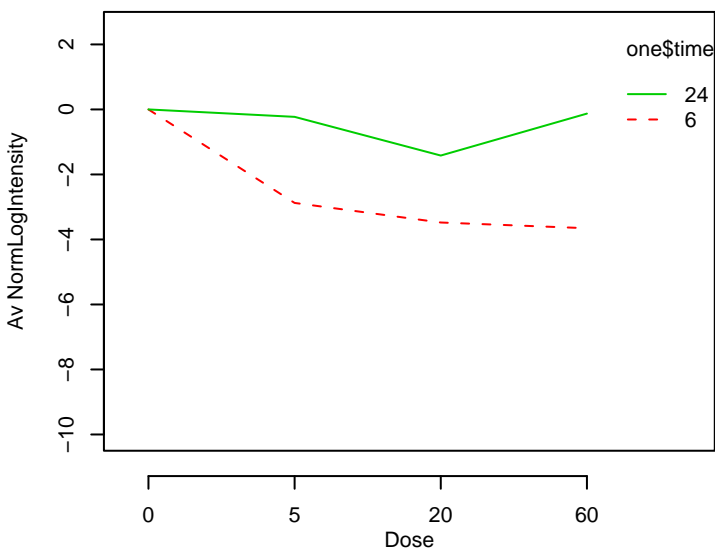

**GO\_0050868 : negative regulation of T cell activation**

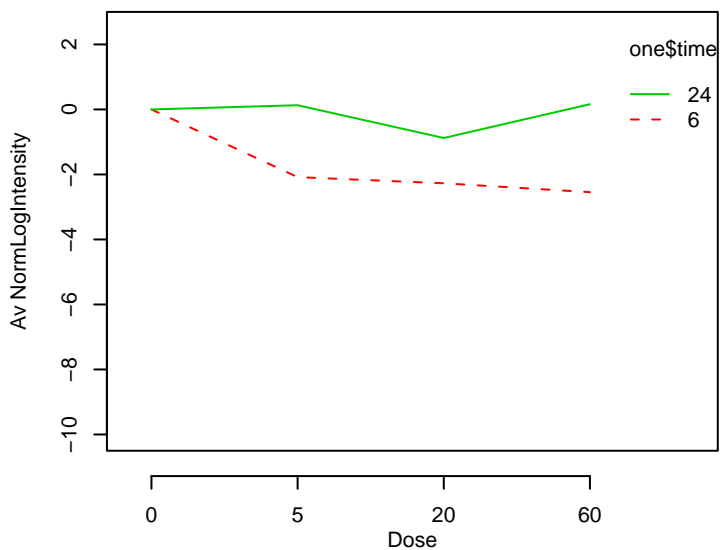

**GO\_0050869 : negative regulation of B cell activation**

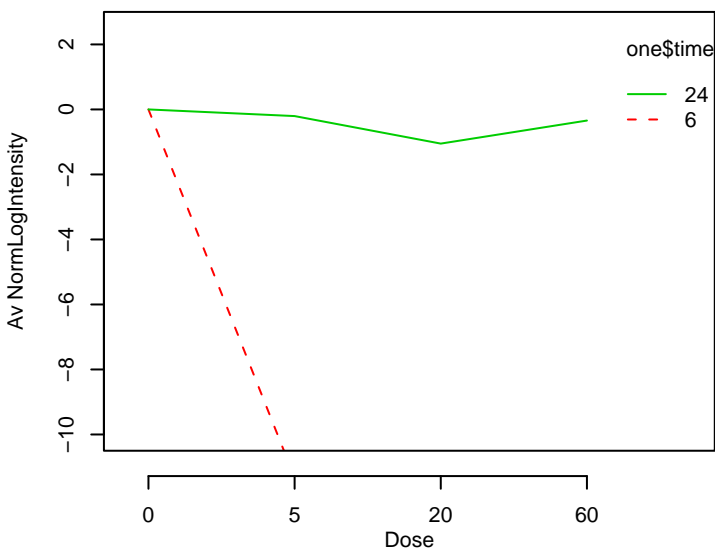

**GO\_0050870 : positive regulation of T cell activation**

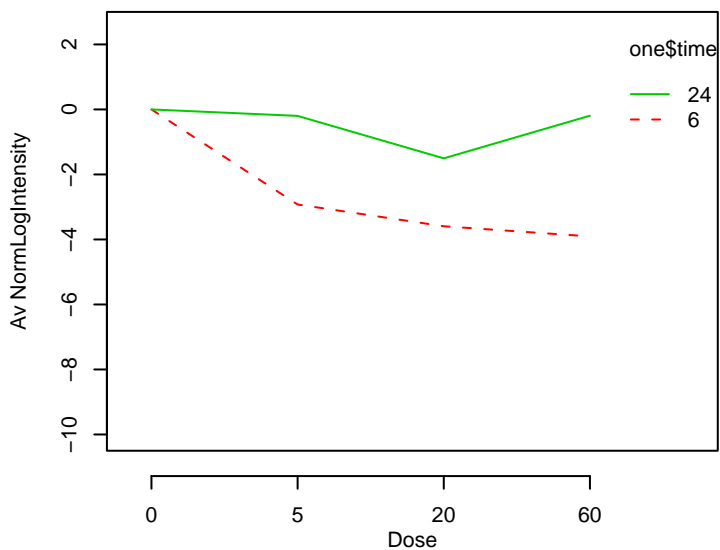

**GO\_0050871 : positive regulation of B cell activation**

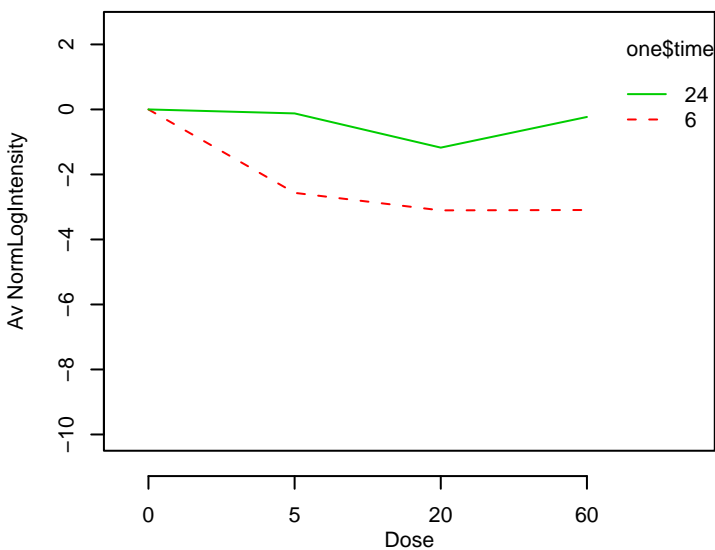

**GO\_0050876 : reproductive physiological process**

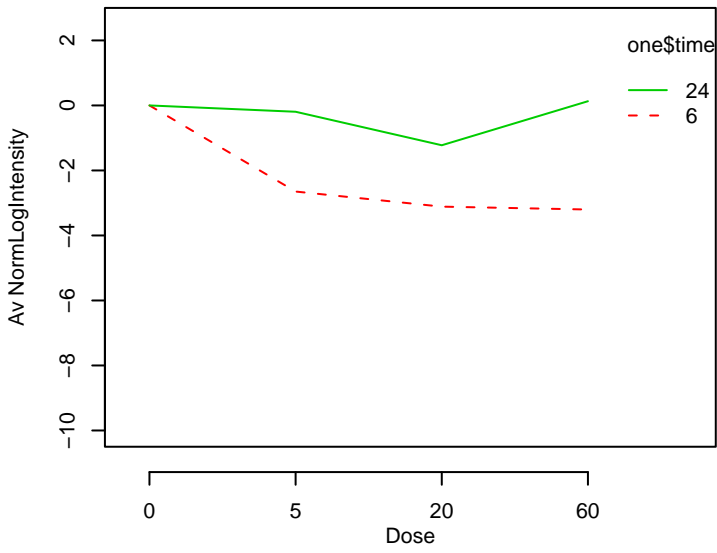

**GO\_0050878 : regulation of body fluids**

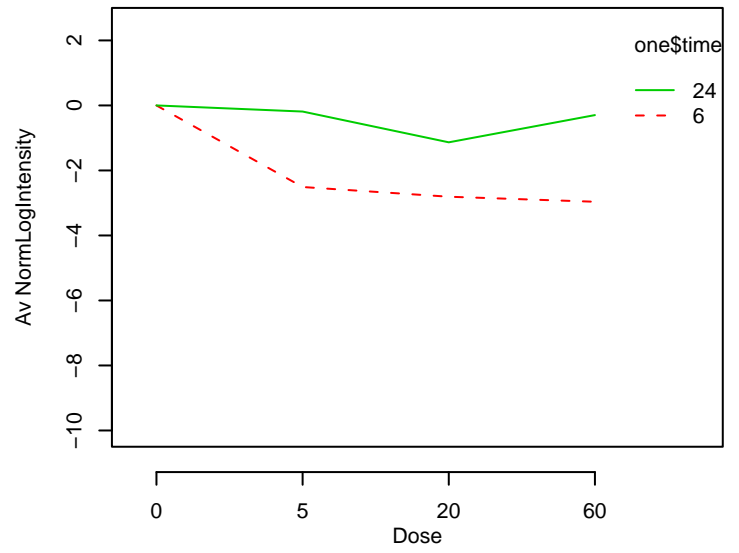

**GO\_0050879 : organismal movement**

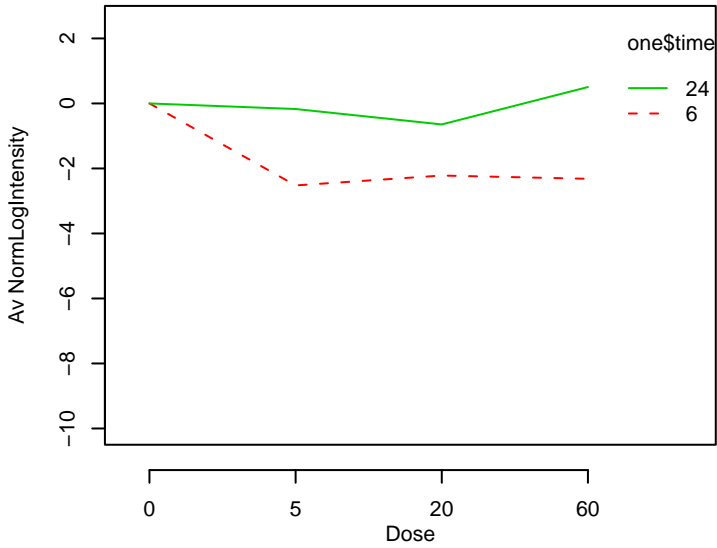

**GO\_0050880 : regulation of blood vessel size**

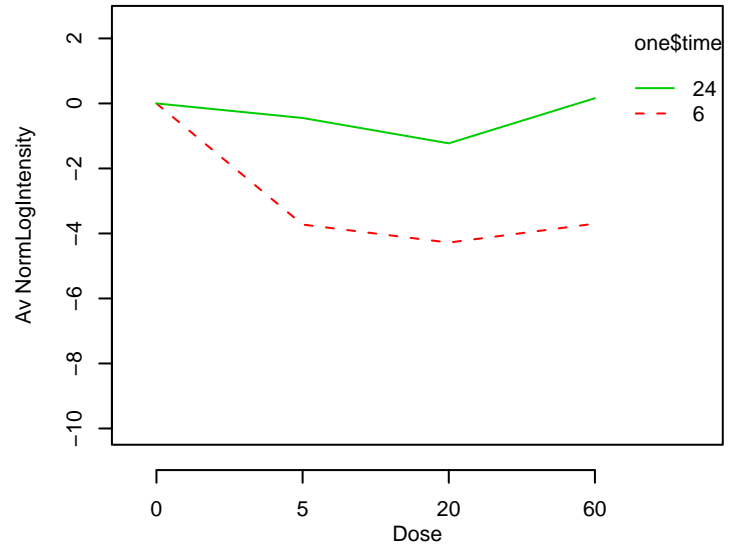

**GO\_0050881 : musculoskeletal movement**

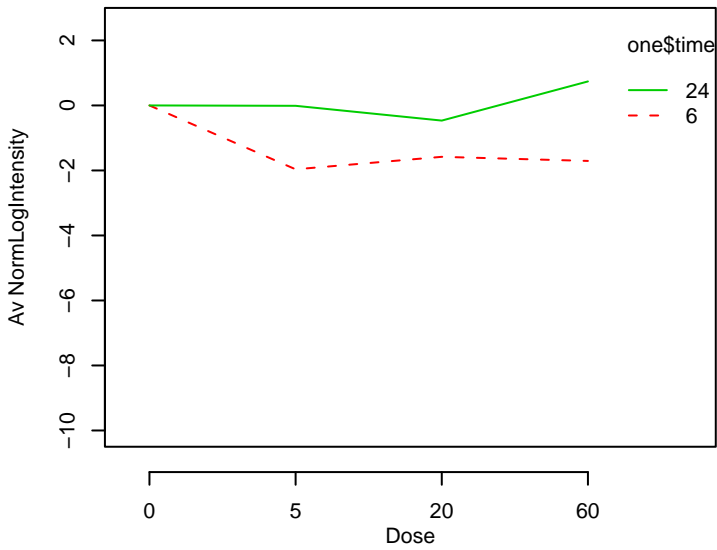

**GO\_0050885 : regulation of balance**

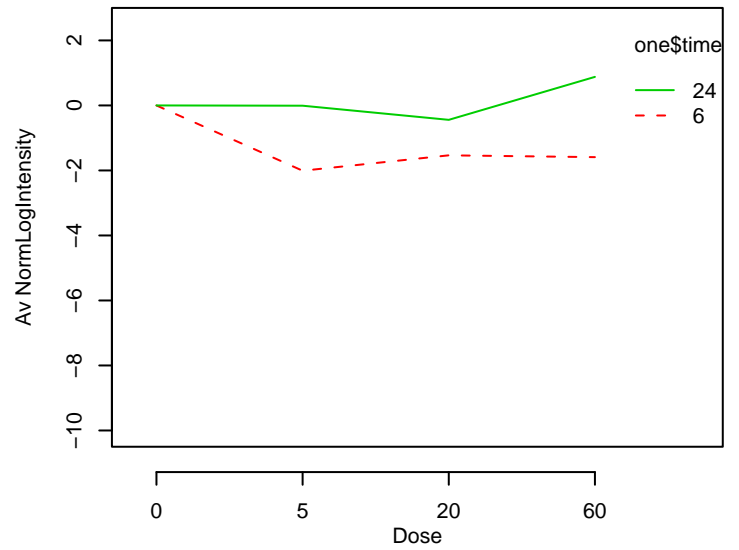

**GO\_0050886 : endocrine physiological process**

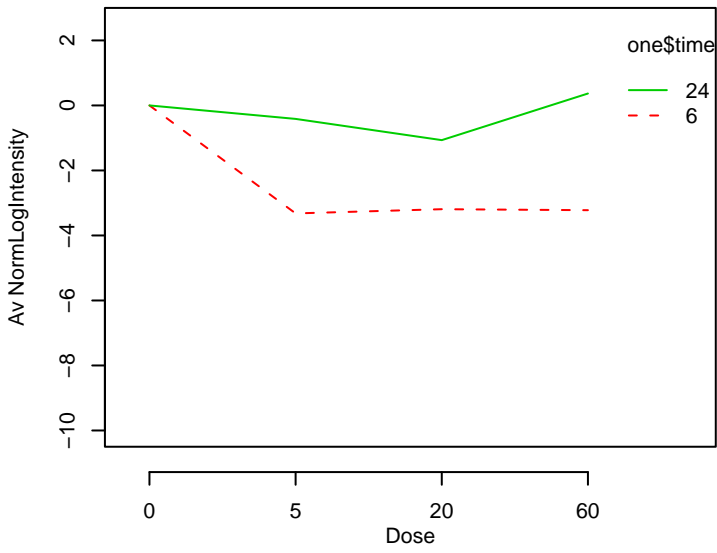

**GO\_0050892 : intestinal absorption**

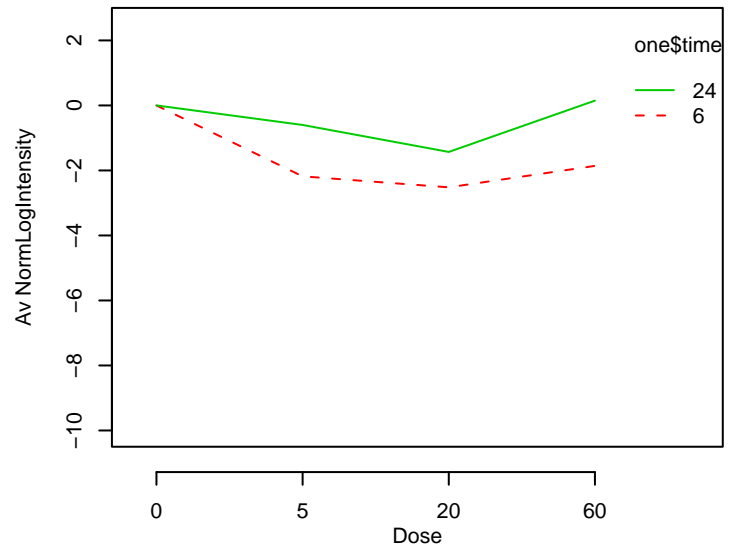

**GO\_0050900 : leukocyte migration**

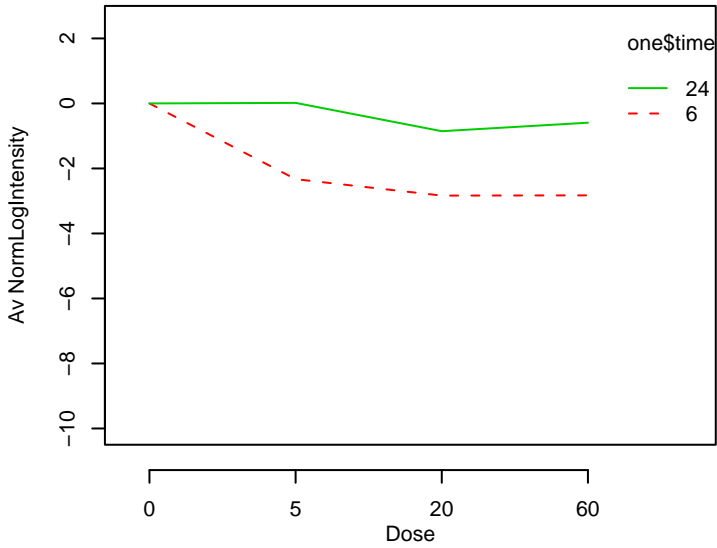

**GO\_0050906 : detection of stimulus during sensory percept**

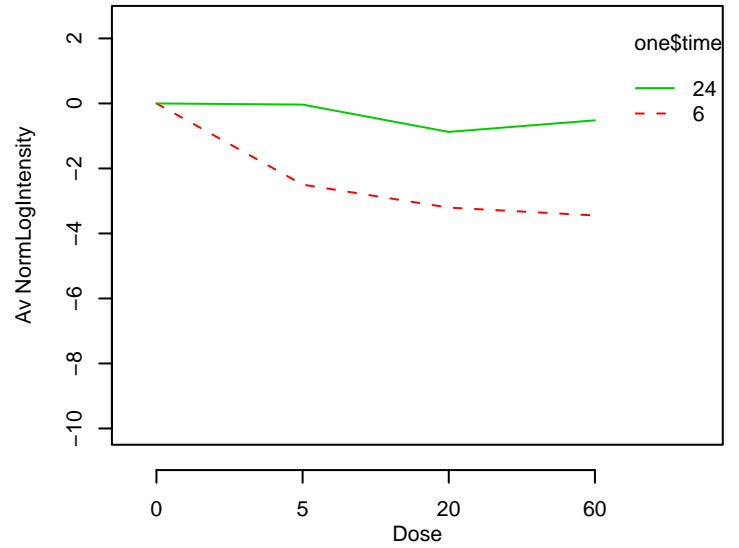

**GO\_0050909 : sensory perception of taste**

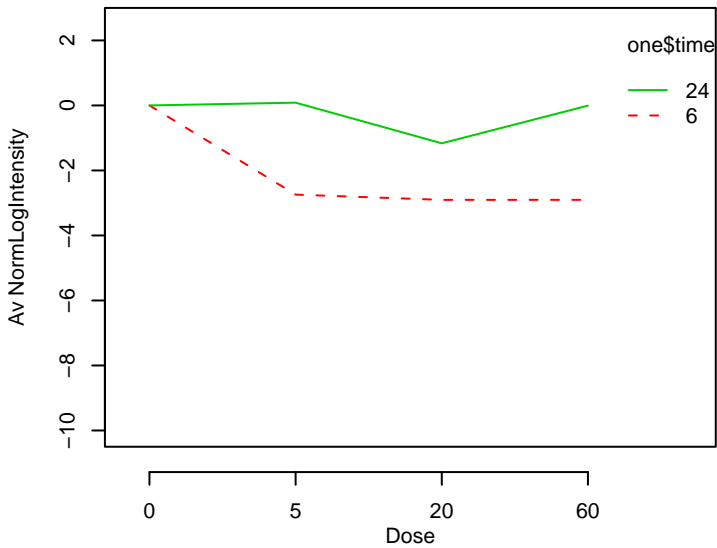

**GO\_0050918 : positive chemotaxis**

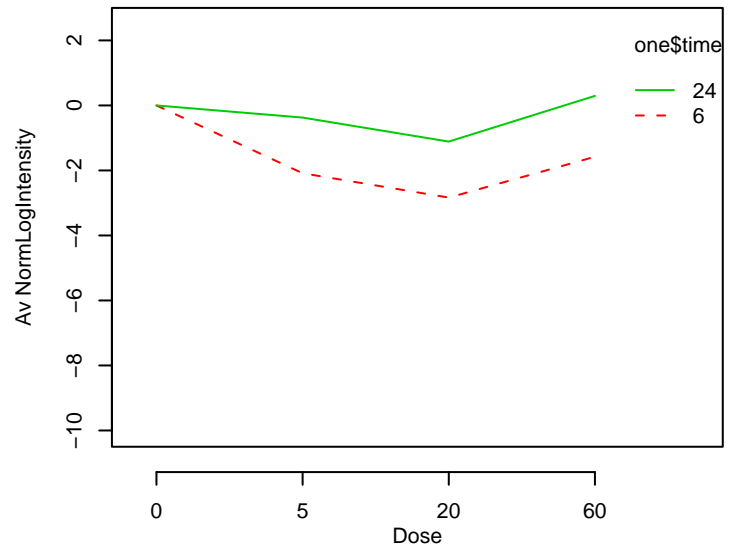

**GO\_0050920 : regulation of chemotaxis**

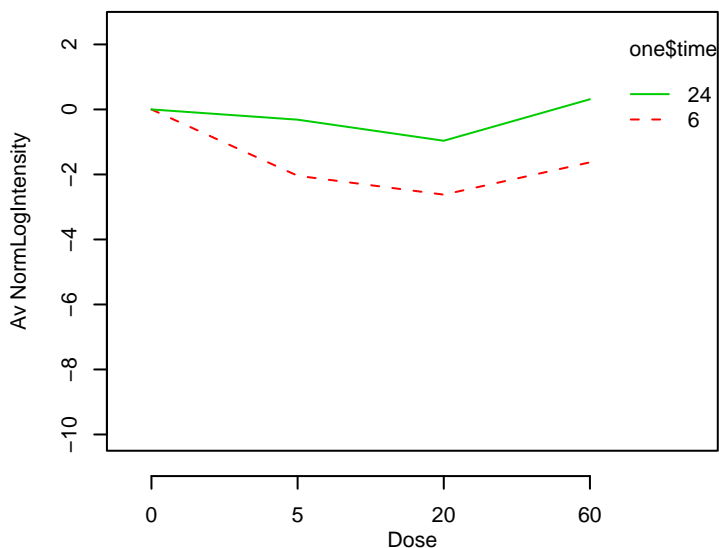

**GO\_0050921 : positive regulation of chemotaxis**

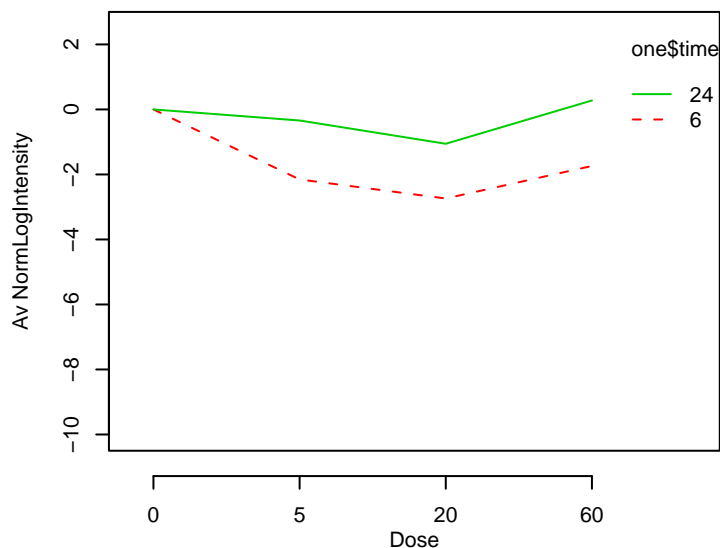

**GO\_0050926 : regulation of positive chemotaxis**

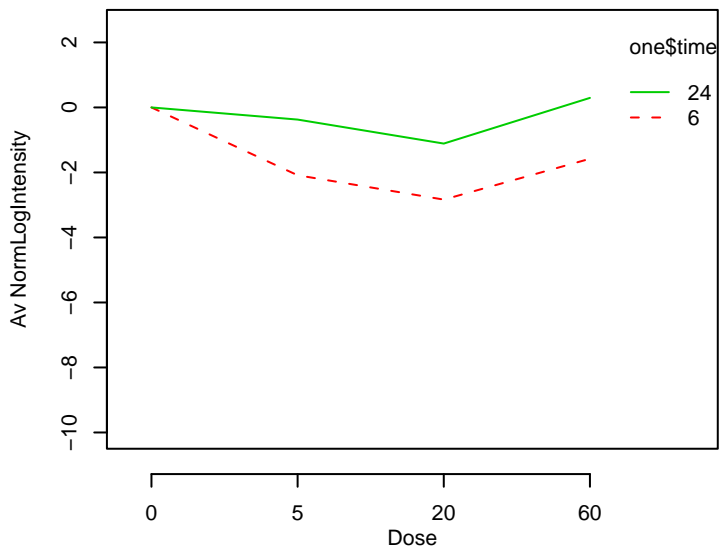

**GO\_0050927 : positive regulation of positive chemotaxis**

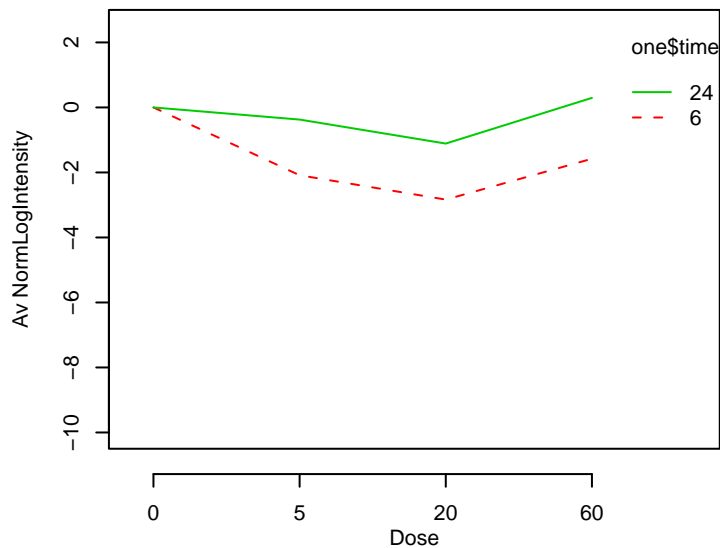

**GO\_0050930 : induction of positive chemotaxis**

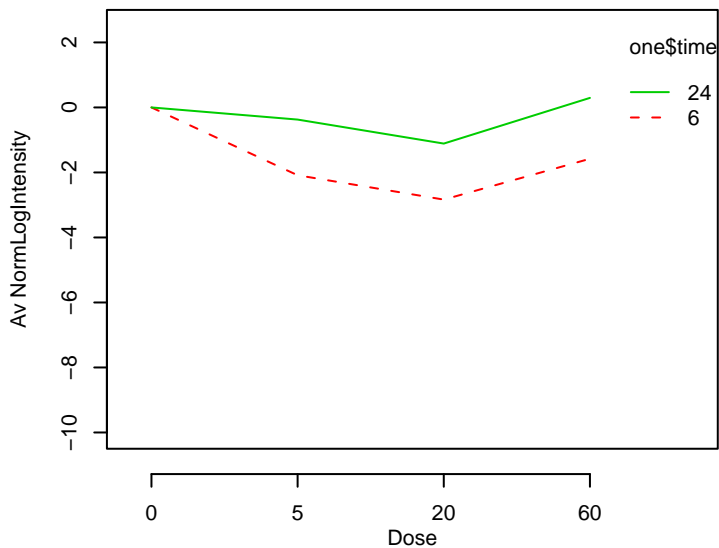

**GO\_0050931 : pigment cell differentiation**

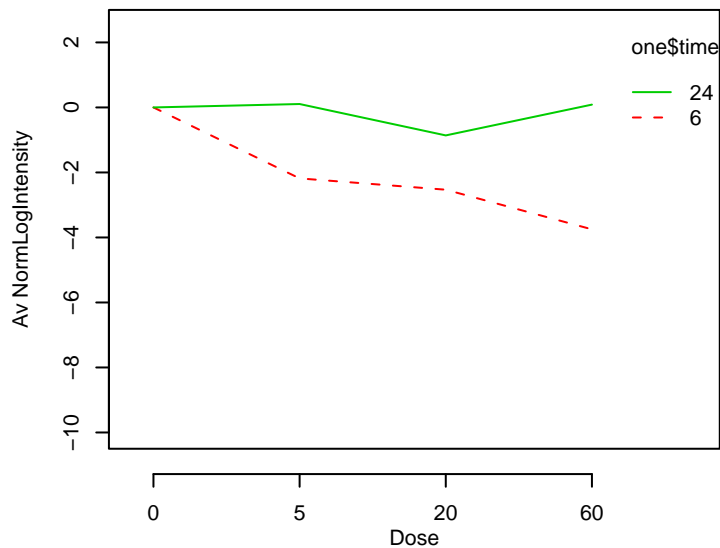



**GO\_0050951 : sensory perception of temperature stimulu**

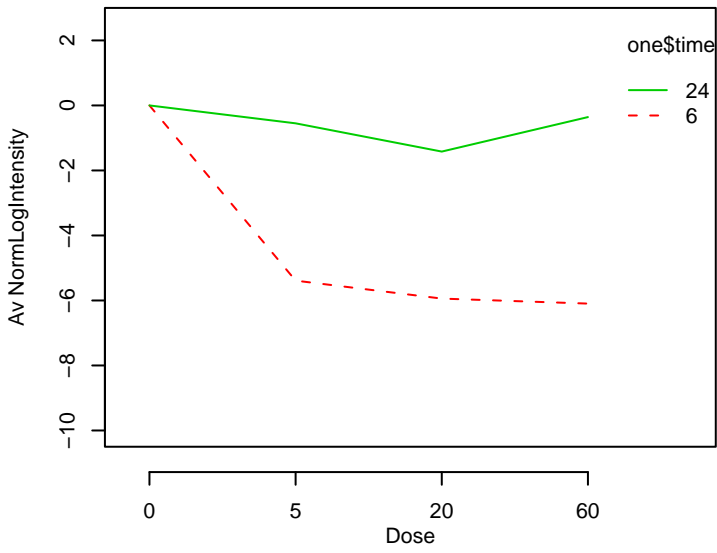

**GO\_0050953 : sensory perception of light stimulus**

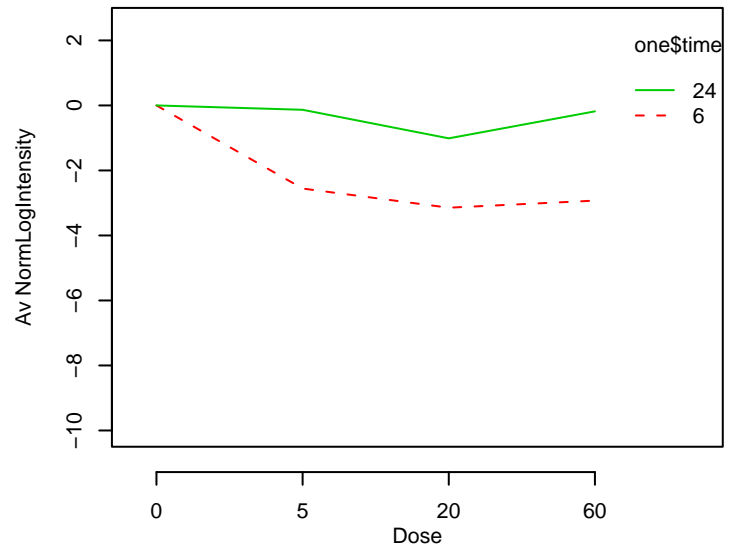

**GO\_0050954 : sensory perception of mechanical stimulus** **GO\_0050974 : detection of mechanical stimulus during senso**

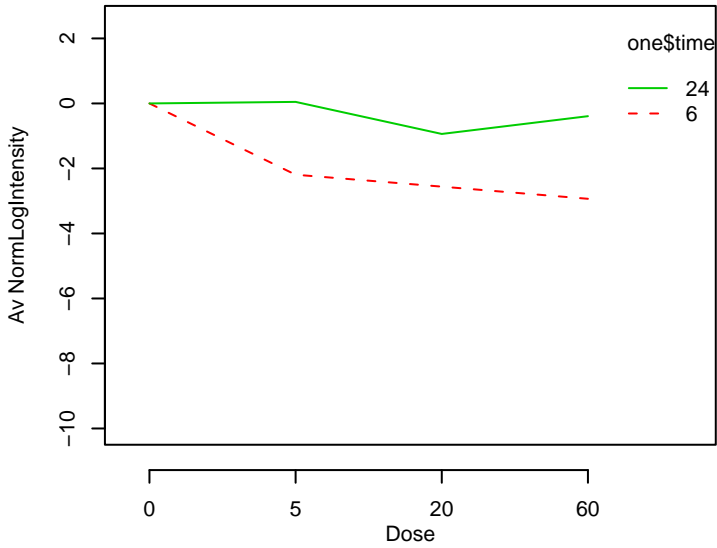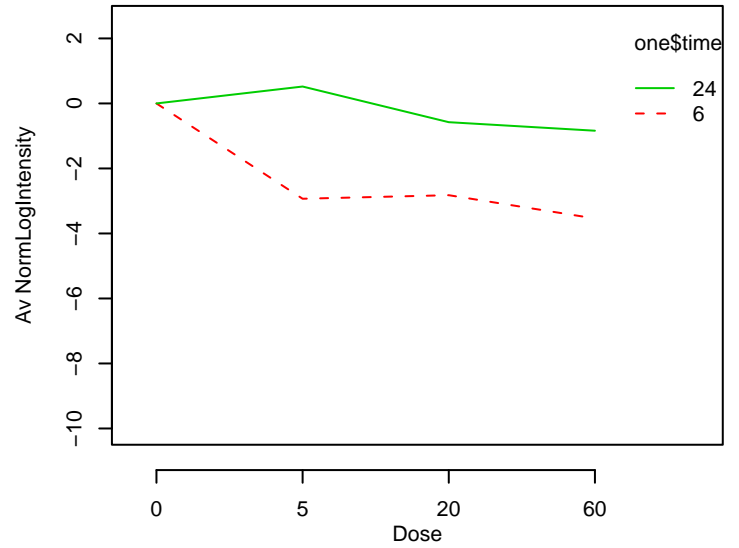

**GO\_0050982 : detection of mechanical stimulus**

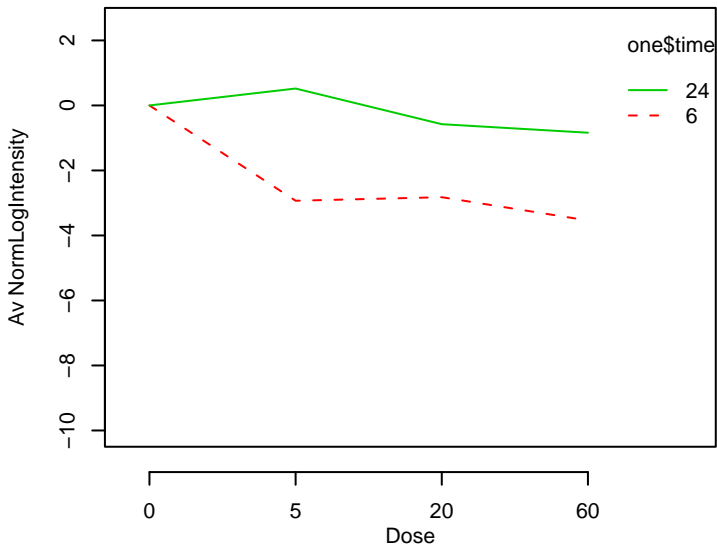

**GO\_0051016 : barbed-end actin filament capping**

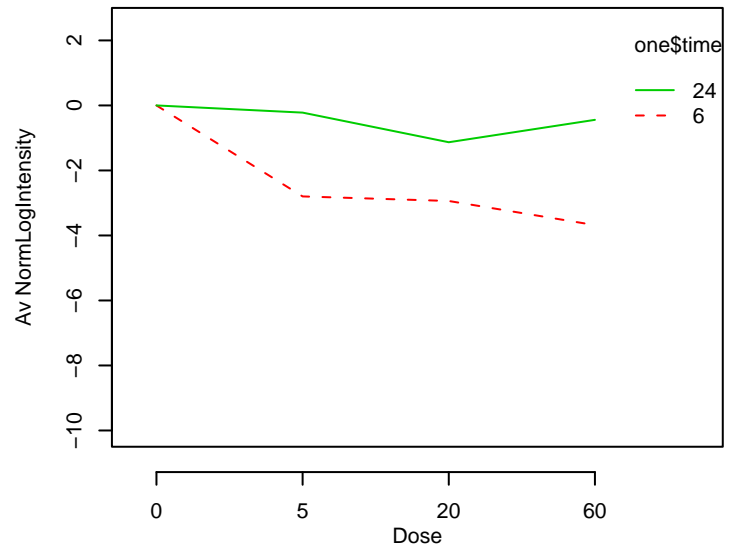

**GO\_0051017 : actin filament bundle formation**

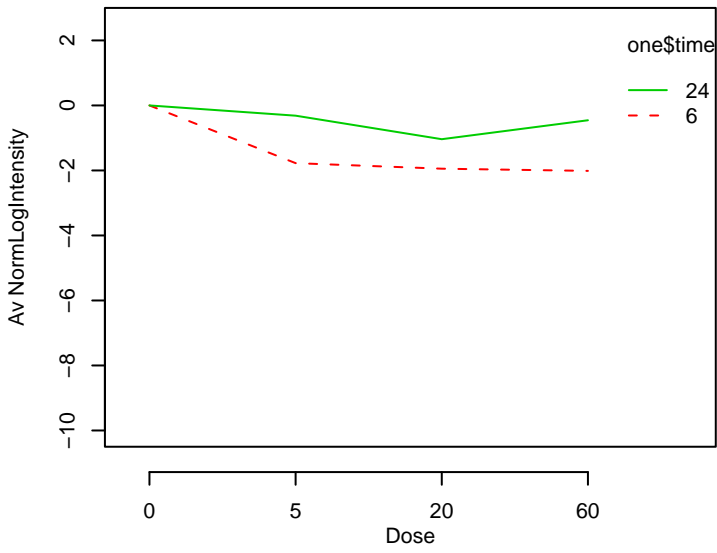

**GO\_0051023 : regulation of immunoglobulin secretion**

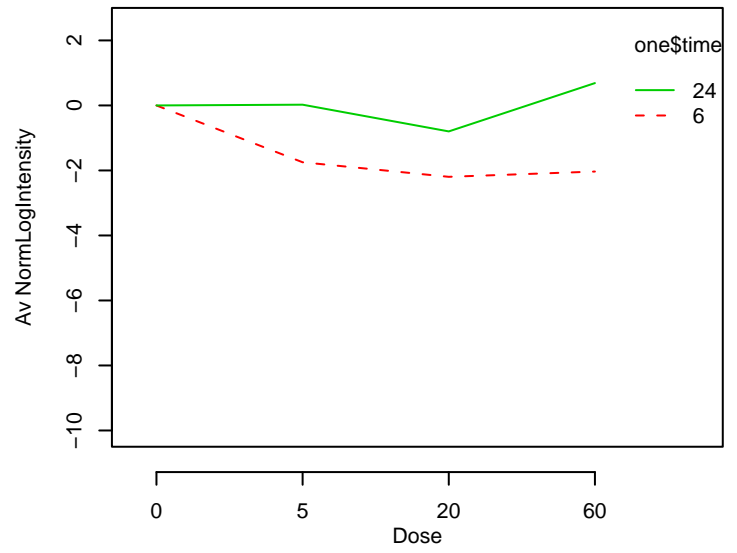

**GO\_0051028 : mRNA transport**

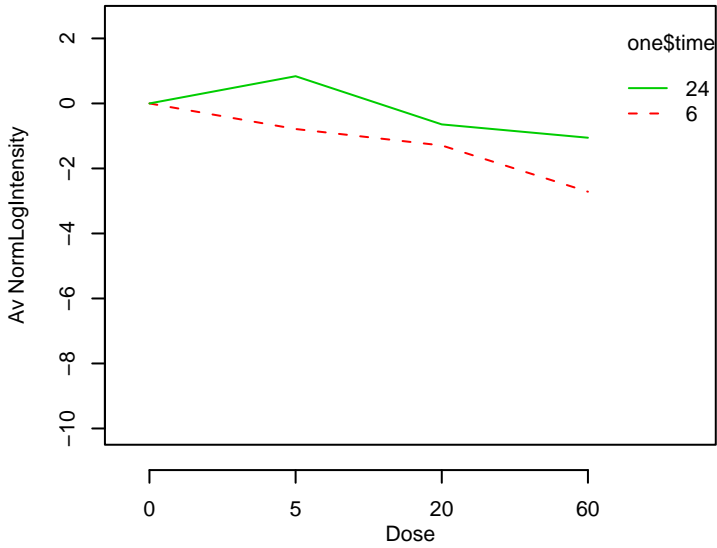

**GO\_0051046 : regulation of secretion**

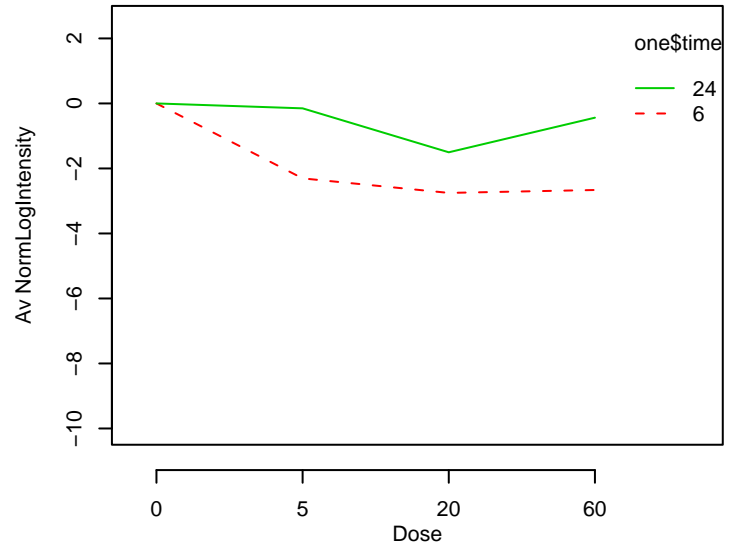

**GO\_0051047 : positive regulation of secretion**

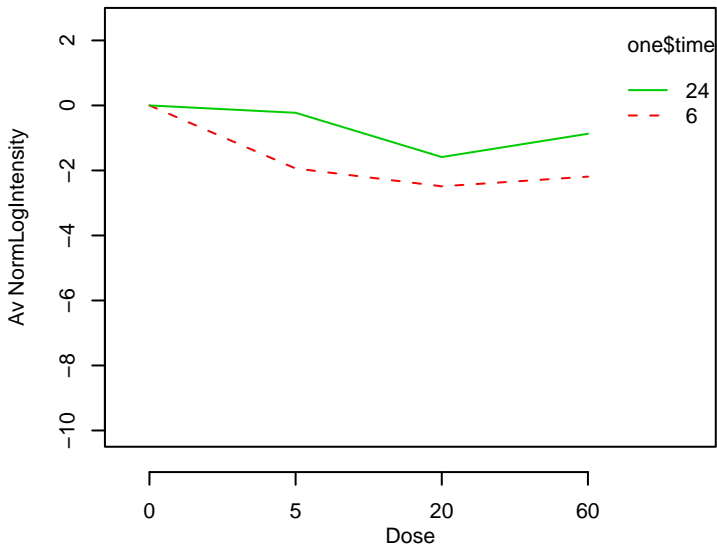

**GO\_0051048 : negative regulation of secretion**

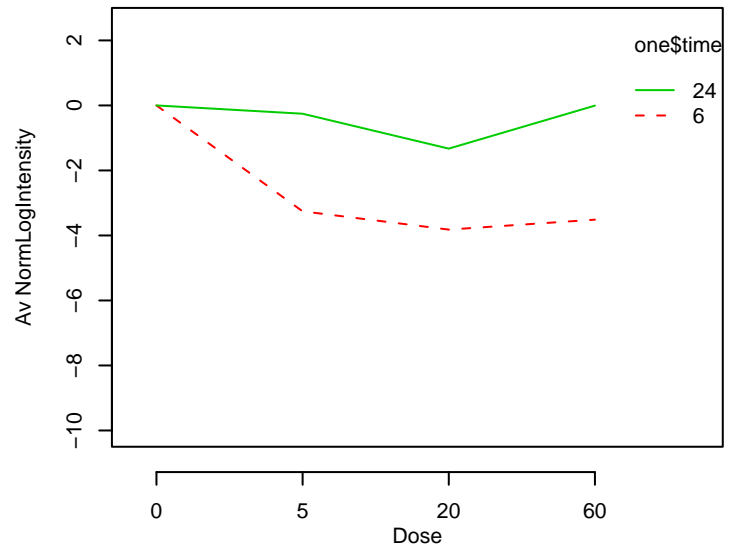

**GO\_0051049 : regulation of transport**

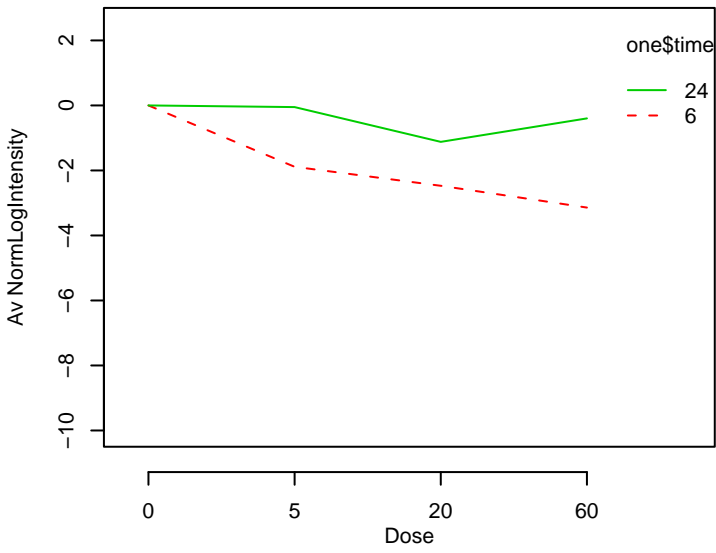

**GO\_0051050 : positive regulation of transport**

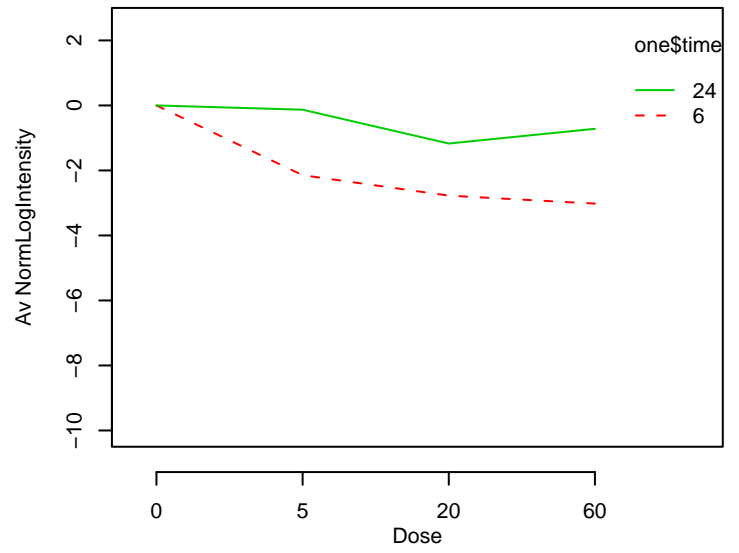

**GO\_0051051 : negative regulation of transport**

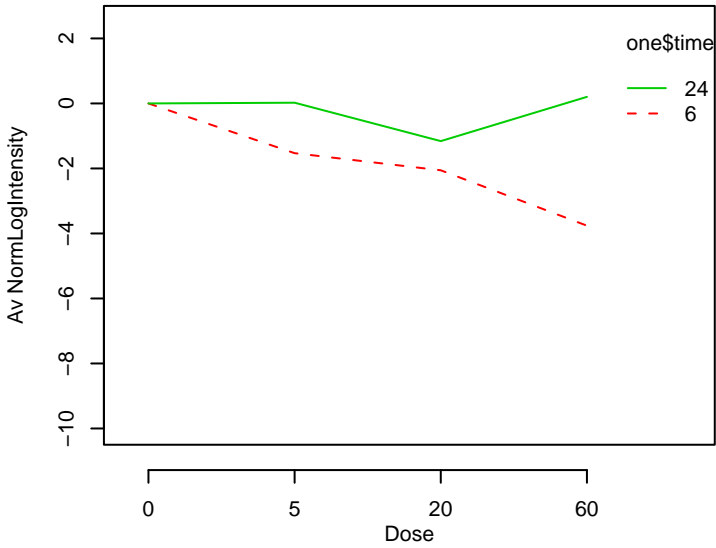

**GO\_0051052 : regulation of DNA metabolism**

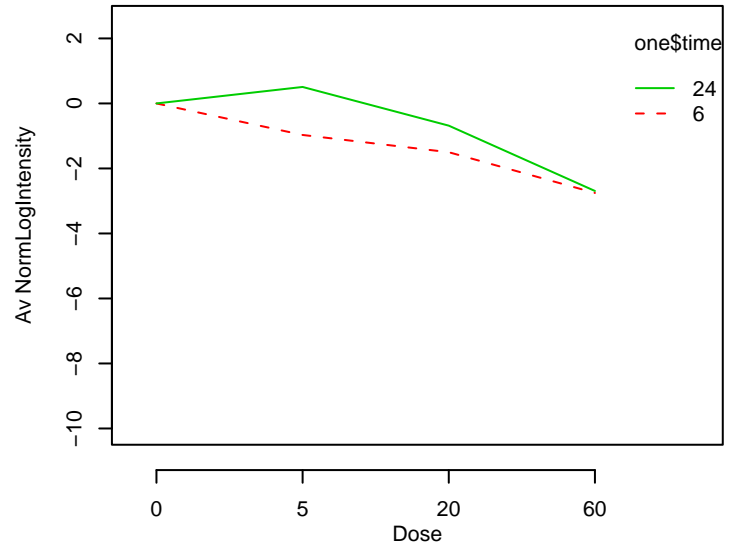

**GO\_0051053 : negative regulation of DNA metabolism**

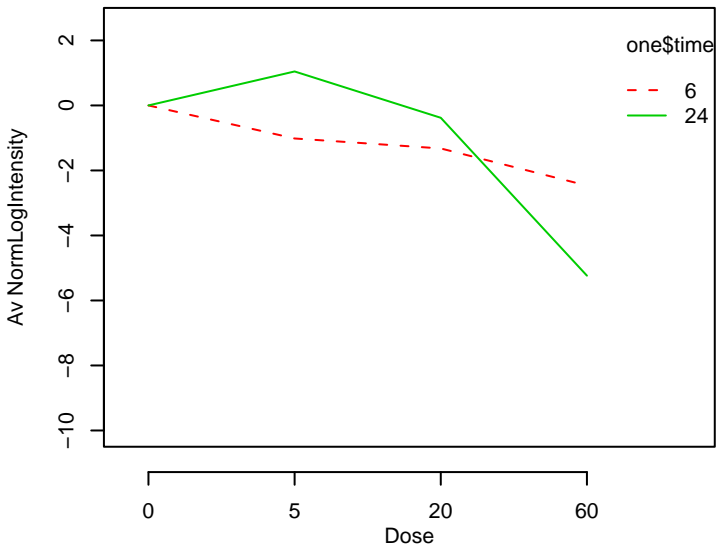

**GO\_0051054 : positive regulation of DNA metabolism**

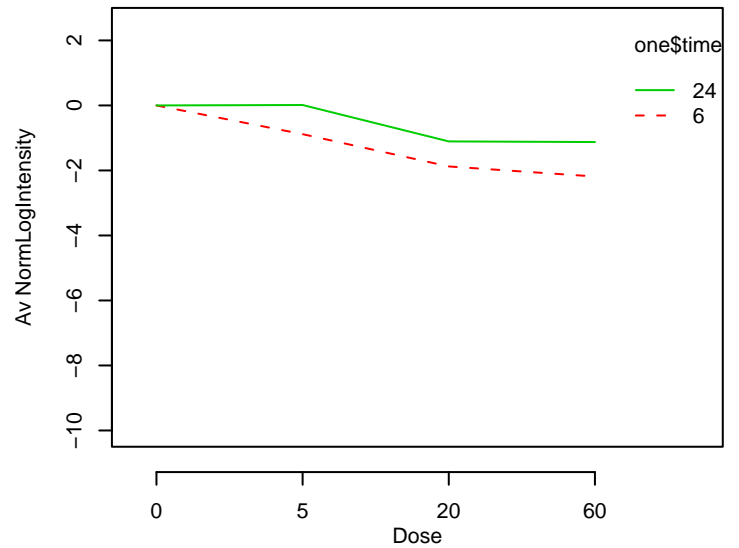

**GO\_0051056 : regulation of small GTPase mediated signal tra**

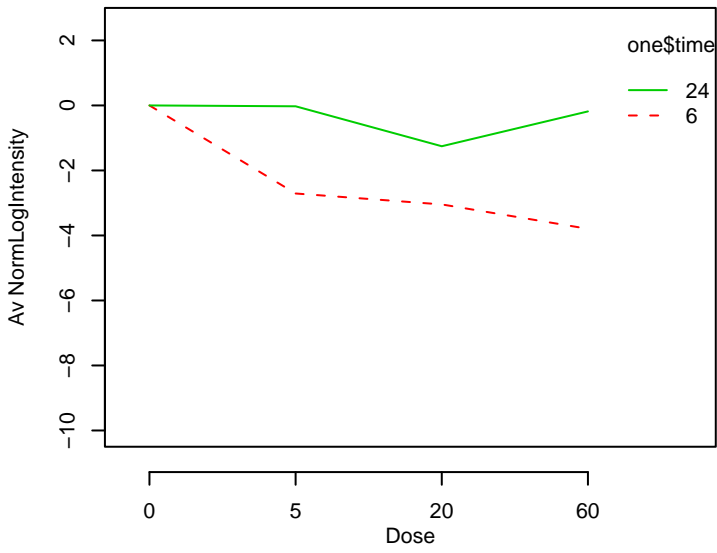

**GO\_0051057 : positive regulation of small GTPase mediated s**

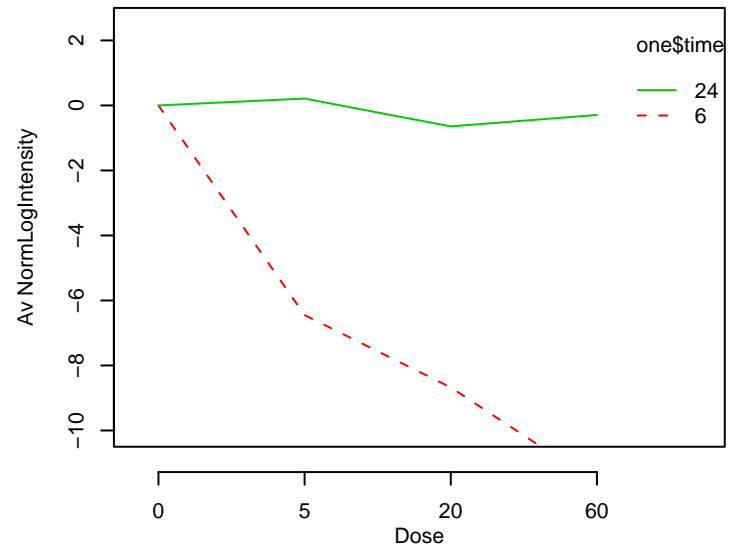

**GO\_0051058 : negative regulation of small GTPase mediated :**

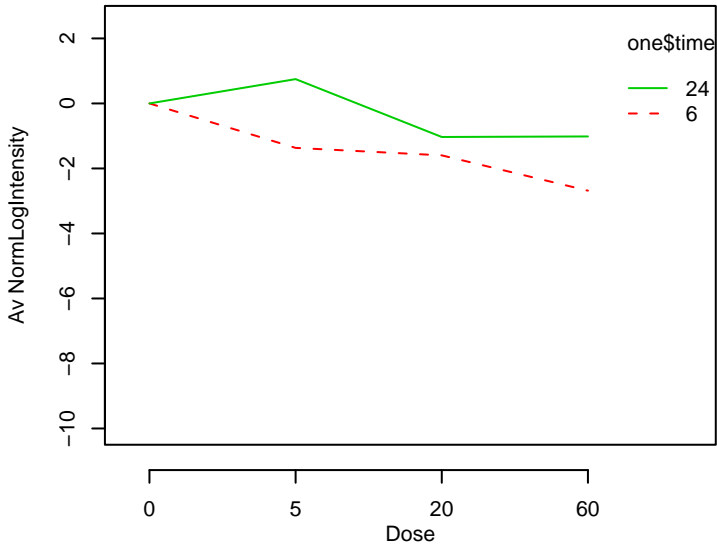

**GO\_0051084 : posttranslational protein folding**

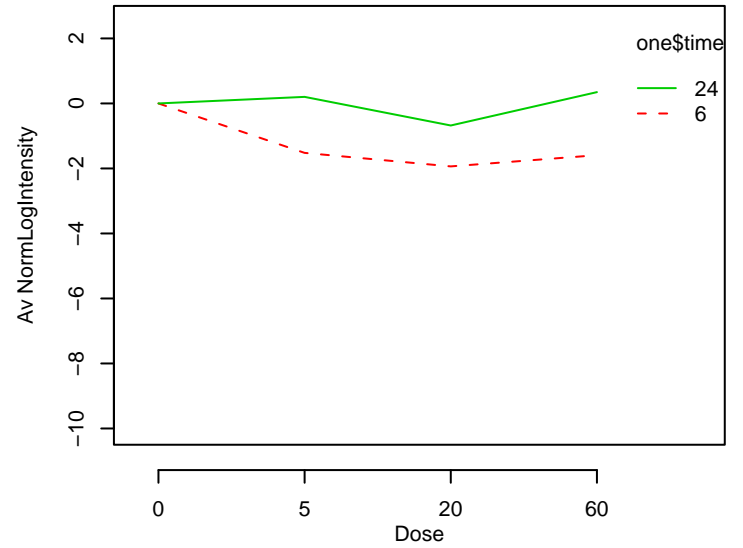

**GO\_0051085 : chaperone cofactor-dependent protein foldi**

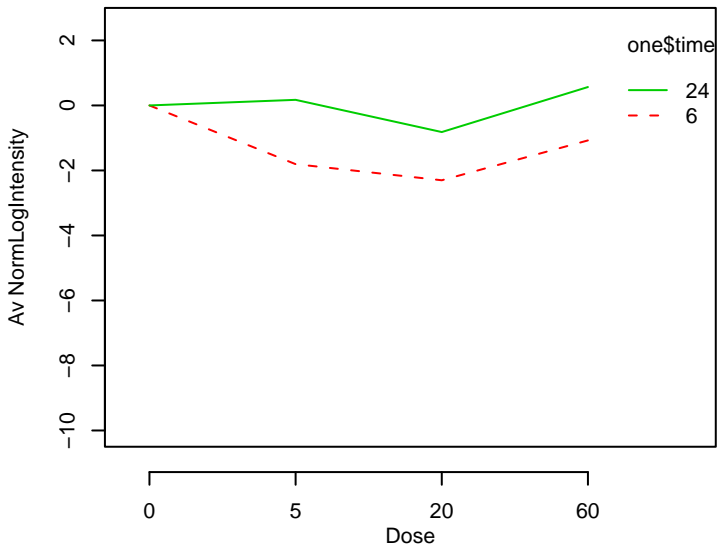

**GO\_0051090 : regulation of transcription factor activity**

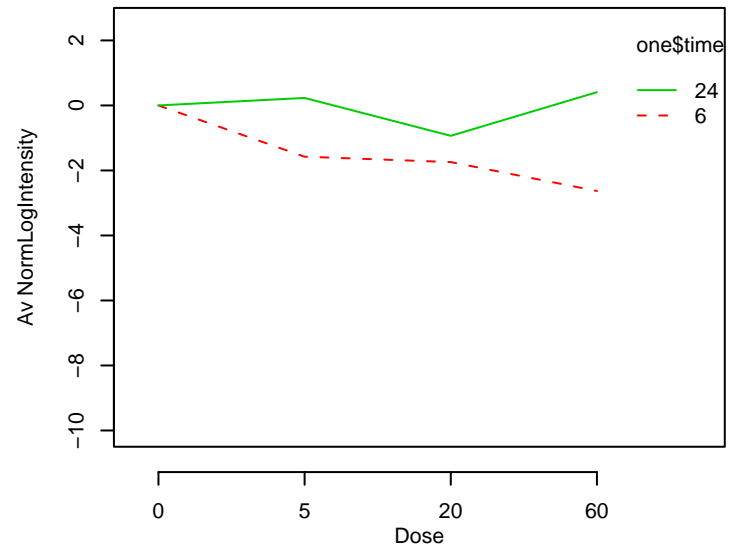

**GO\_0051091 : positive regulation of transcription factor act**

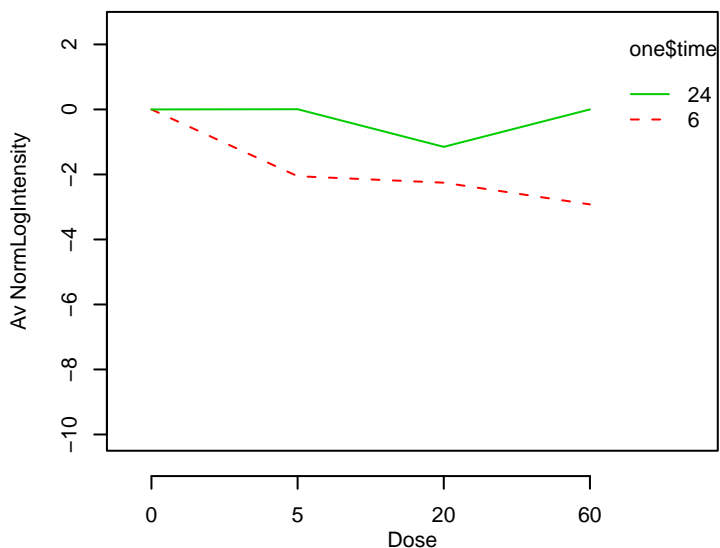

**GO\_0051092 : activation of NF-kappaB transcription facto**

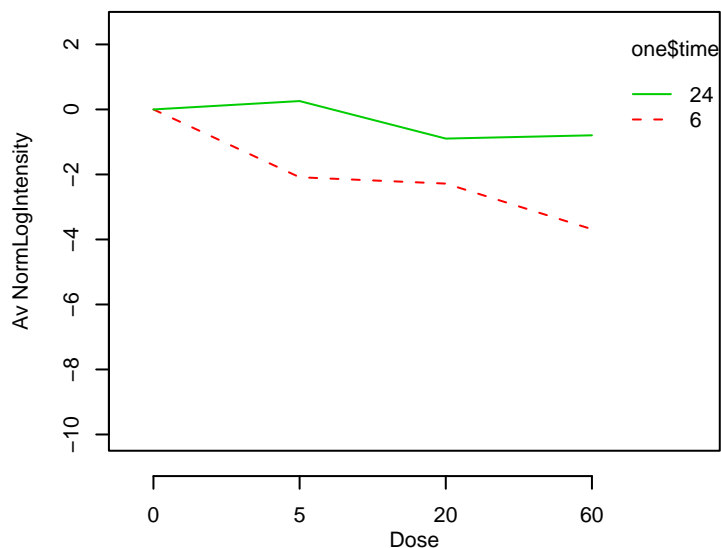

**GO\_0051093 : negative regulation of development**

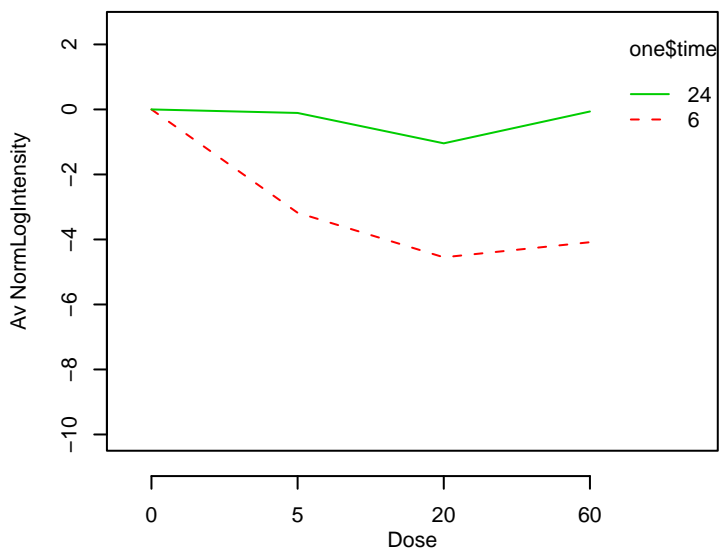

**GO\_0051094 : positive regulation of development**

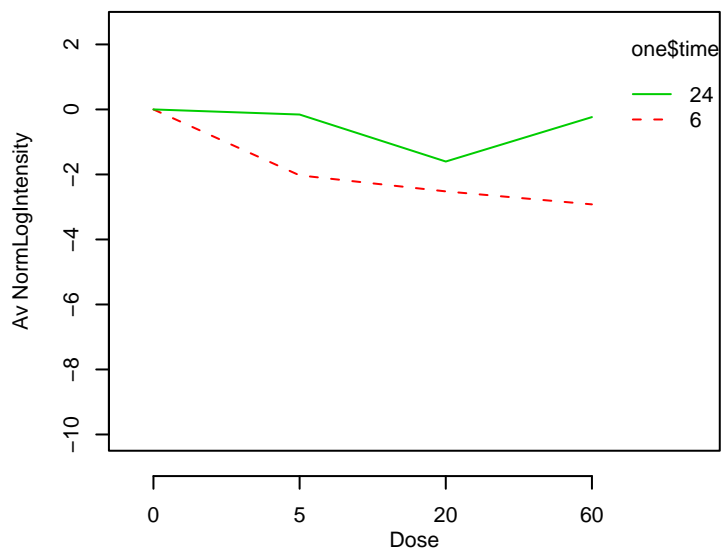

**GO\_0051098 : regulation of binding**

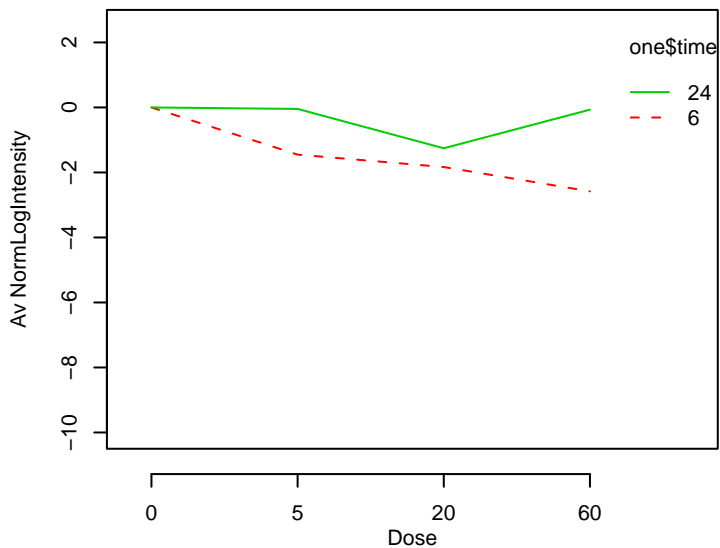

**GO\_0051099 : positive regulation of binding**

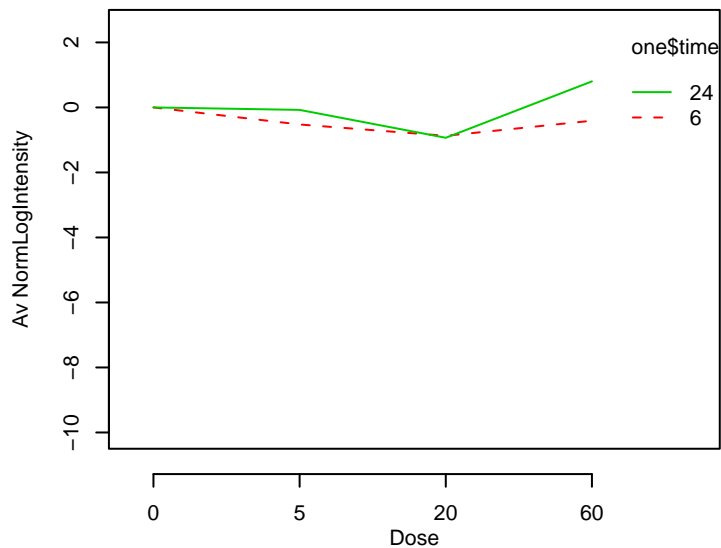

**GO\_0051101 : regulation of DNA binding**

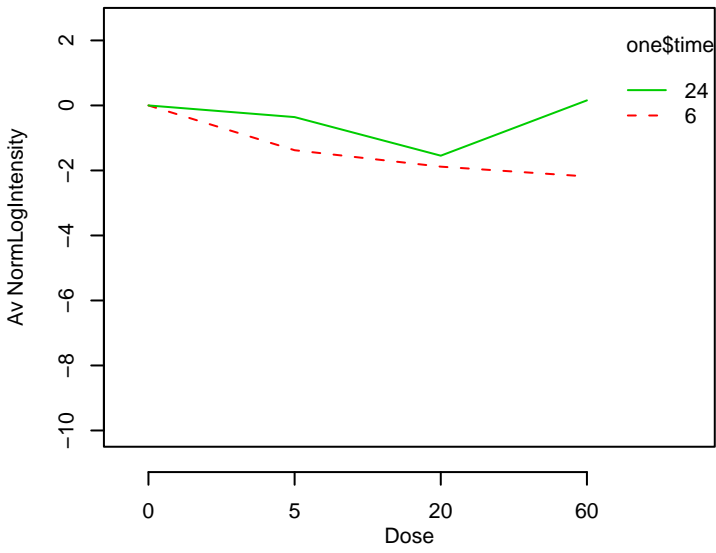

**GO\_0051124 : synaptic growth at neuromuscular junction**

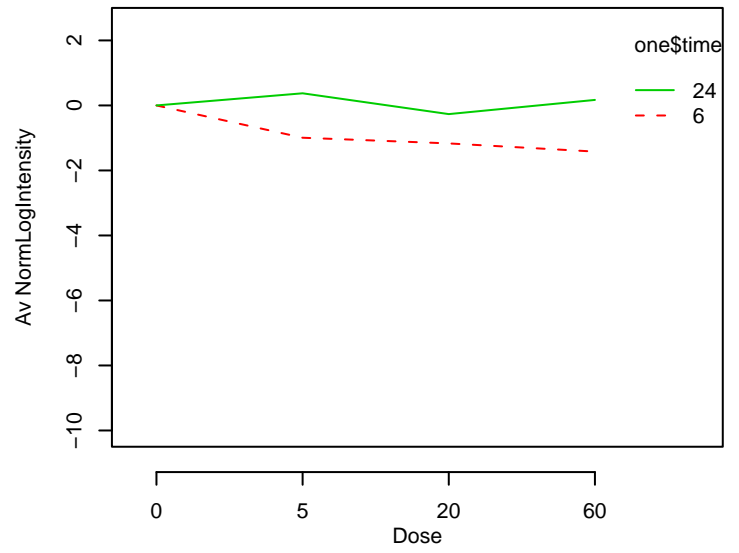

**GO\_0051128 : regulation of cell organization and biogenesis**

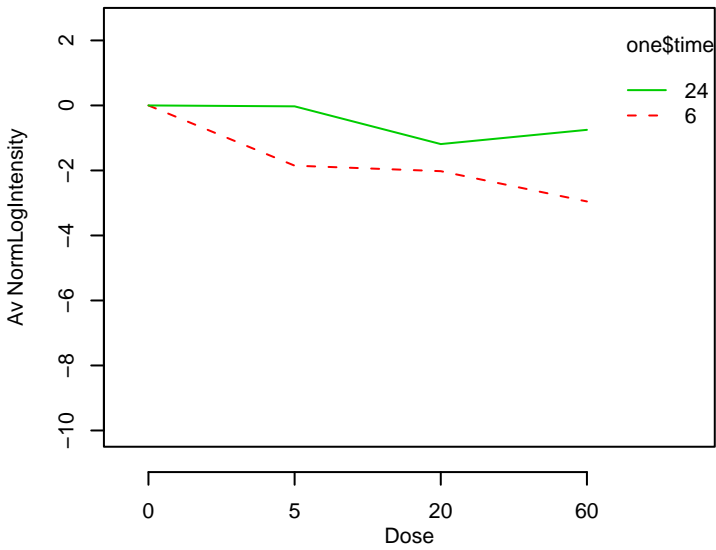

**GO\_0051129 : negative regulation of cell organization and biogenesis**

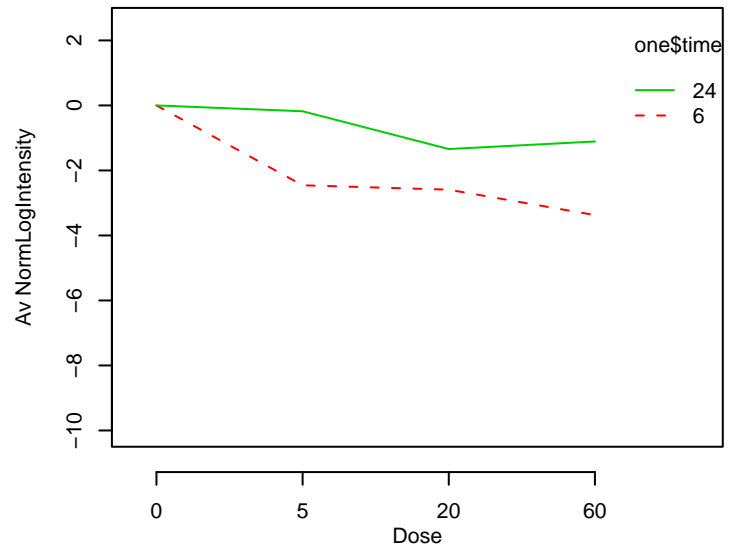

**GO\_0051130 : positive regulation of cell organization and biogenesis**

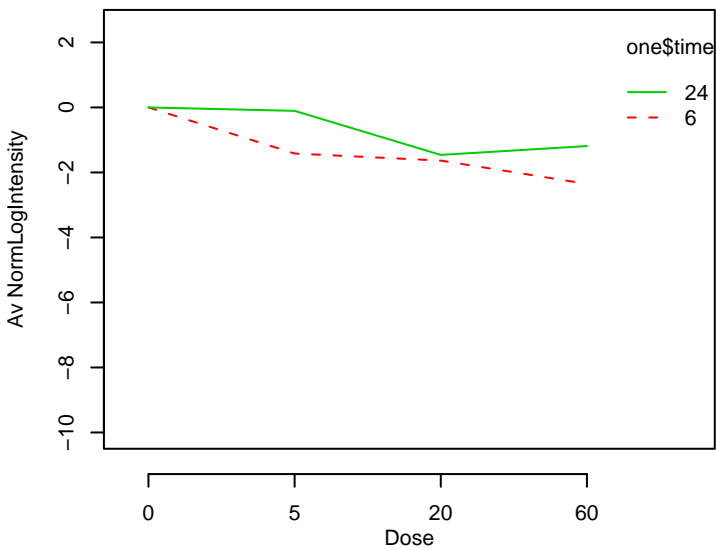

**GO\_0051145 : smooth muscle cell differentiation**

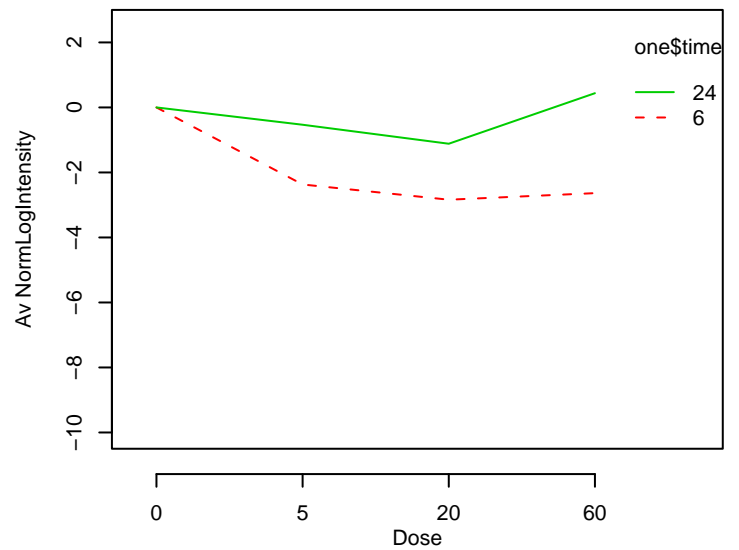

**GO\_0051168 : nuclear export**

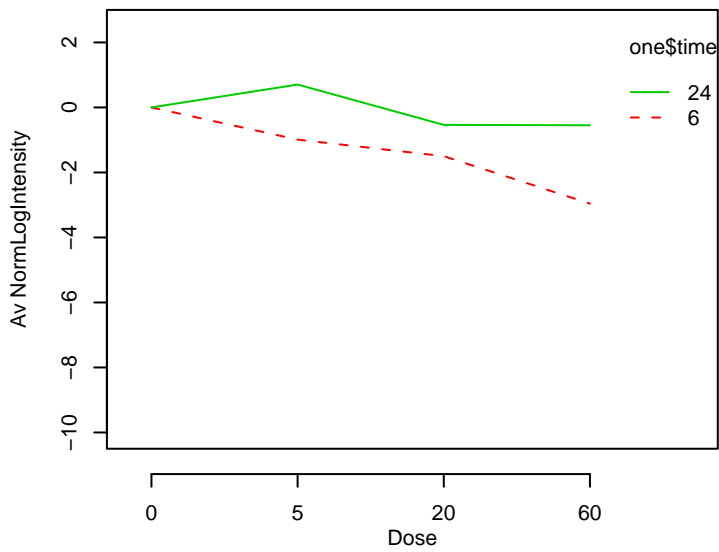

**GO\_0051169 : nuclear transport**

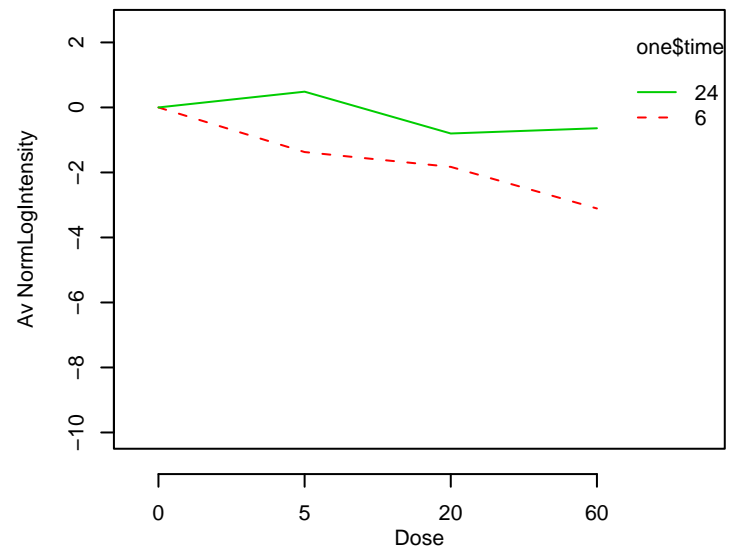

**GO\_0051170 : nuclear import**

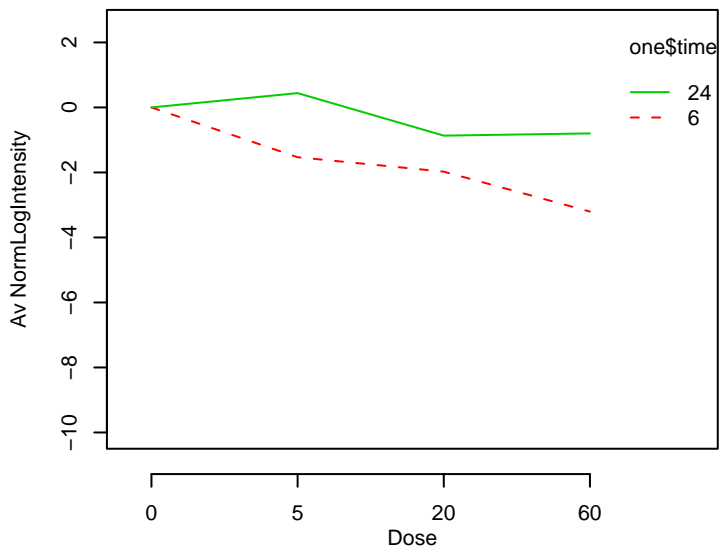

**GO\_0051174 : regulation of phosphorus metabolism**

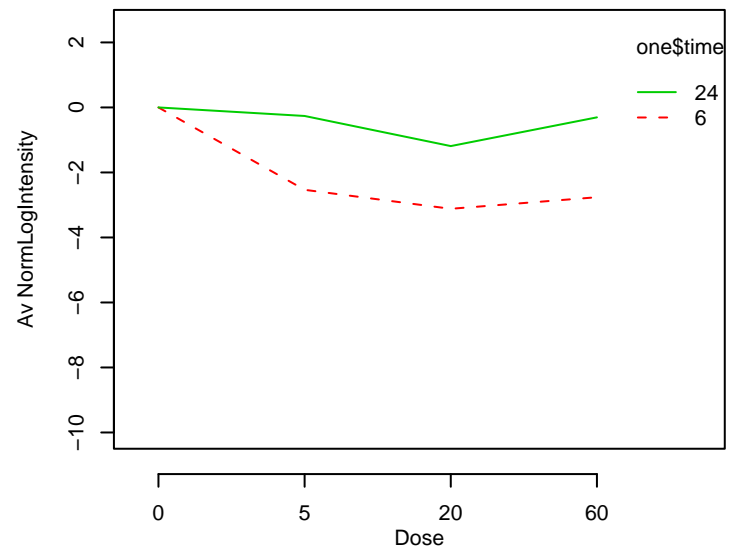

**GO\_0051180 : vitamin transport**

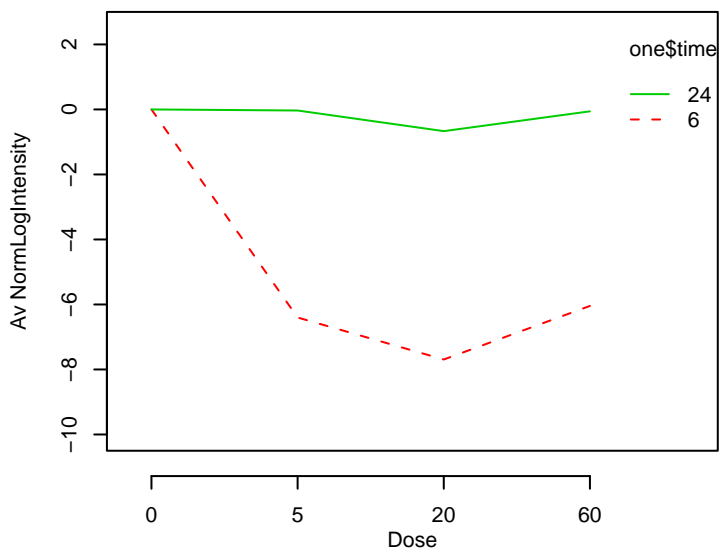

**GO\_0051181 : cofactor transport**

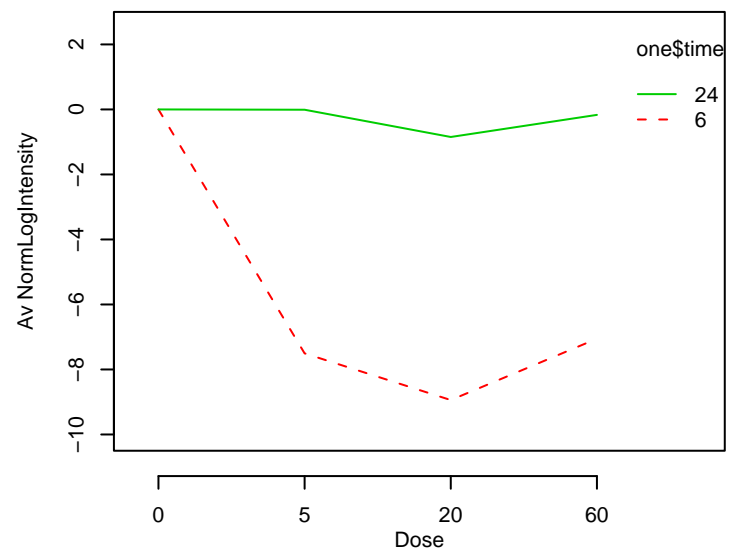

**GO\_0051186 : cofactor metabolism**

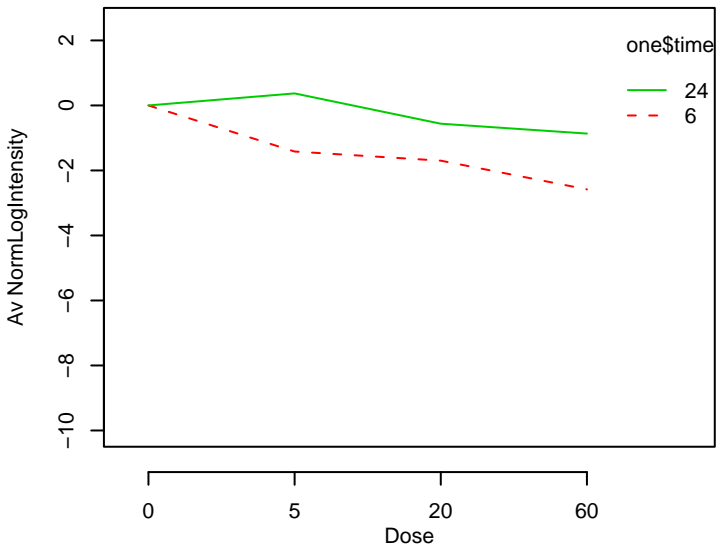

**GO\_0051187 : cofactor catabolism**

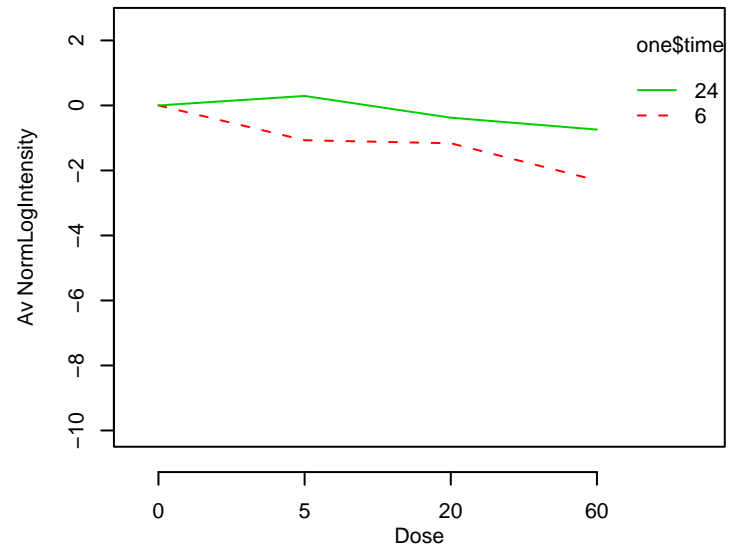

**GO\_0051188 : cofactor biosynthesis**

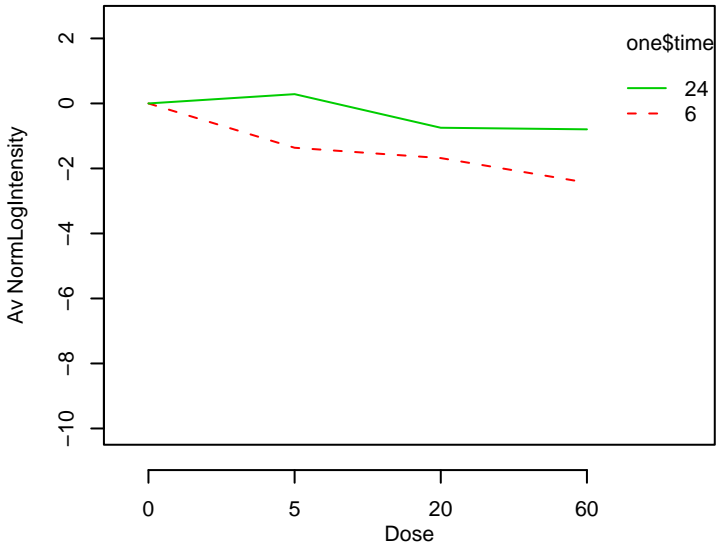

**GO\_0051205 : protein insertion into membrane**

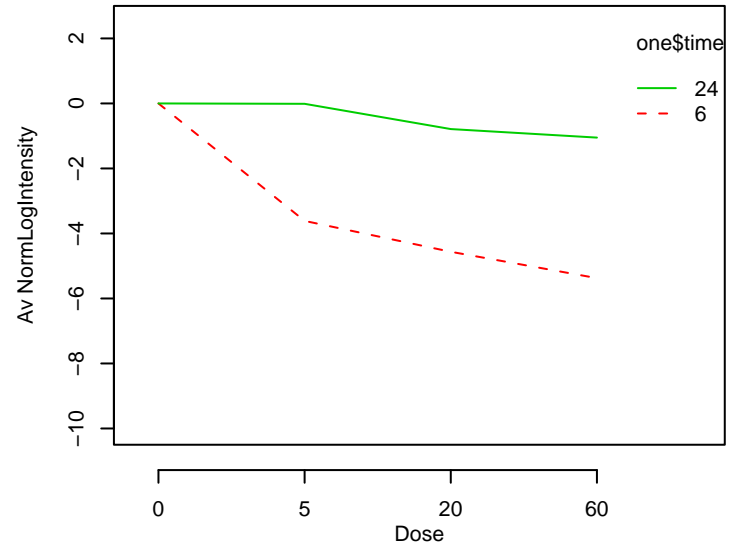

**GO\_0051208 : sequestering of calcium ion**

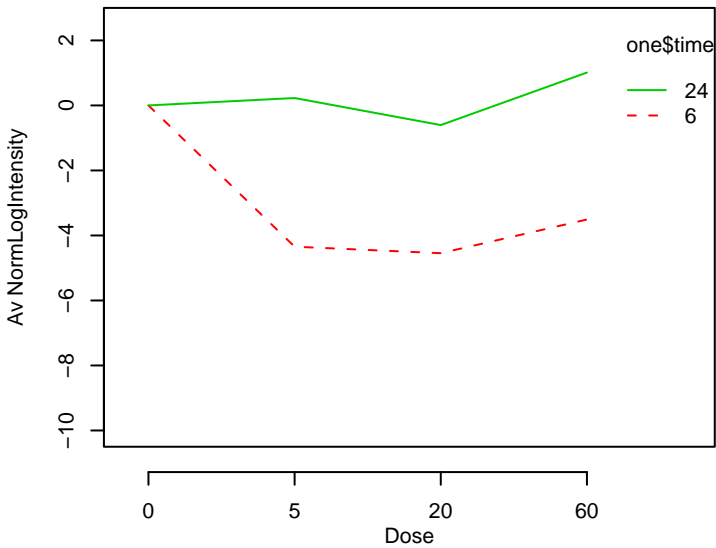

**GO\_0051216 : cartilage development**

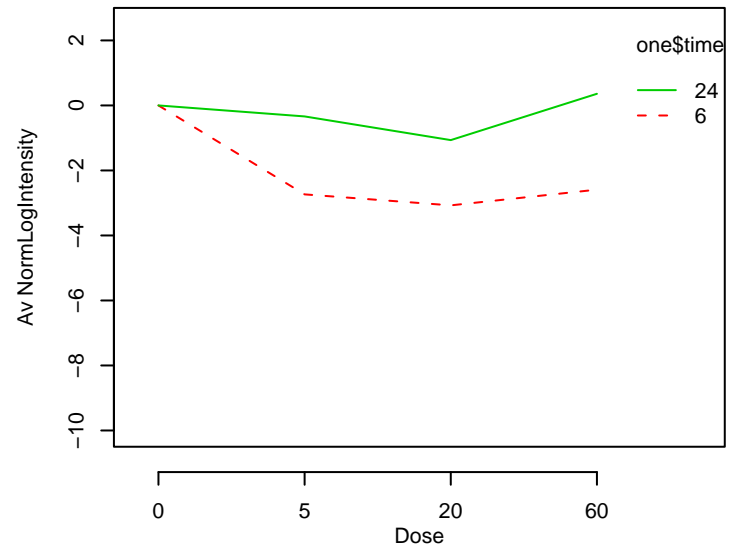



**GO\_0051220 : cytoplasmic sequestering of protein**

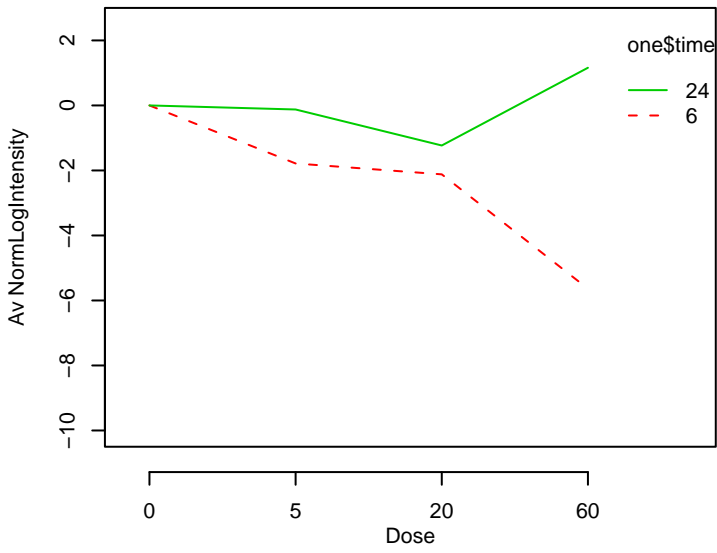

**GO\_0051222 : positive regulation of protein transport**

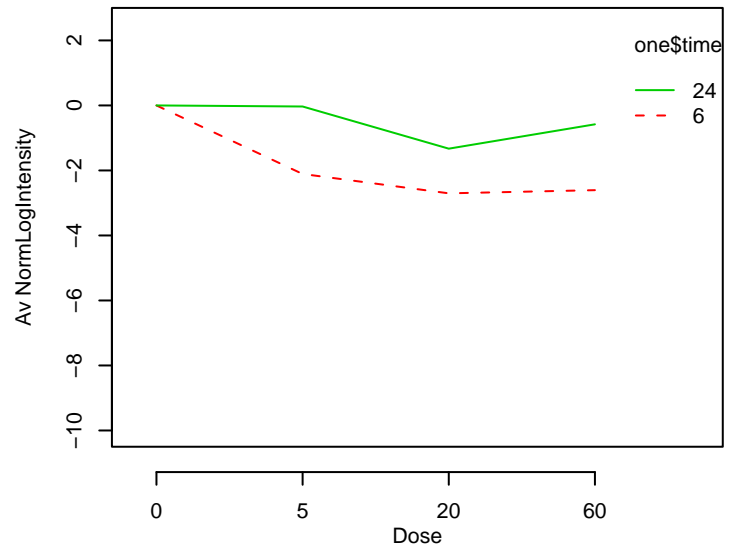

**GO\_0051223 : regulation of protein transport**

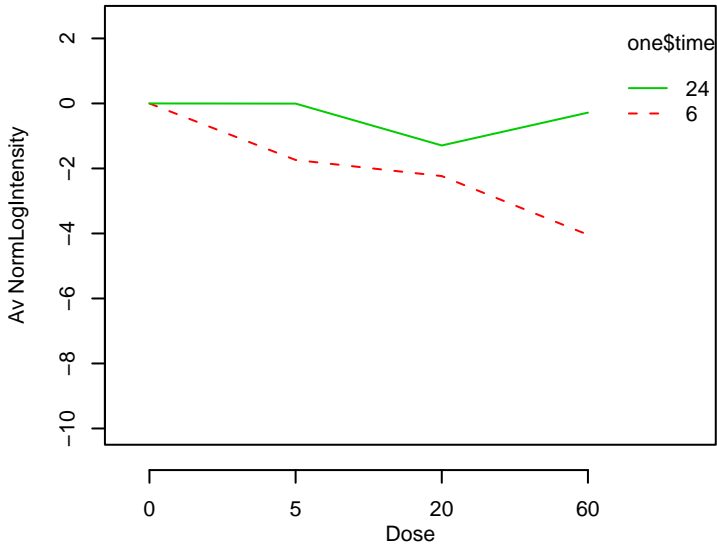

**GO\_0051224 : negative regulation of protein transport**

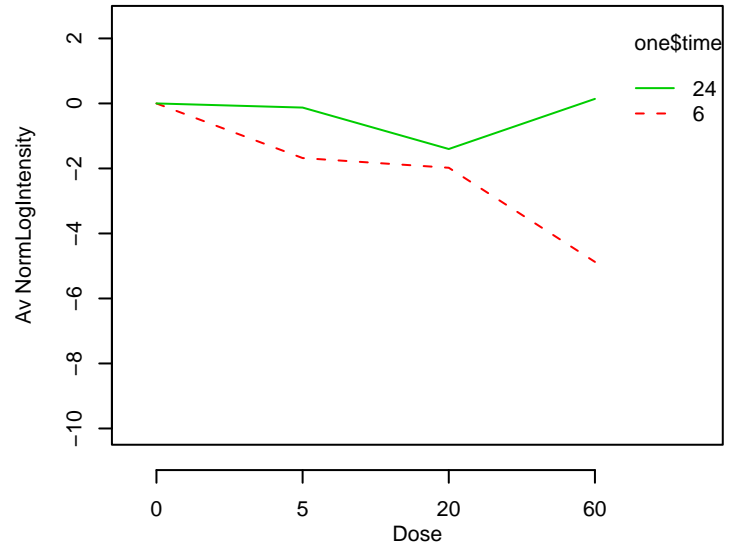

**GO\_0051235 : maintenance of localization**

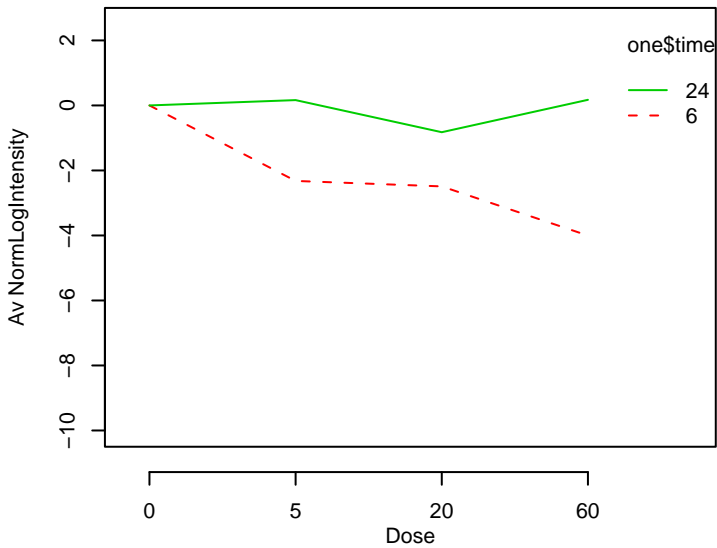

**GO\_0051236 : establishment of RNA localization**

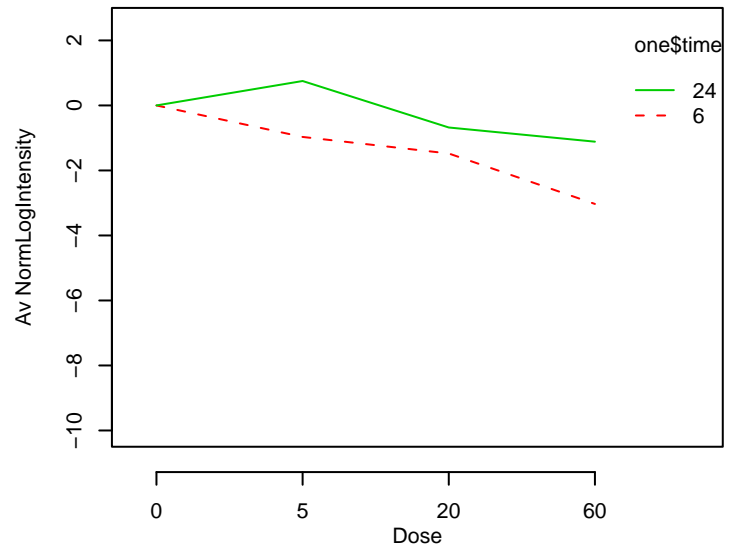

**GO\_0051238 : sequestering of metal ion**

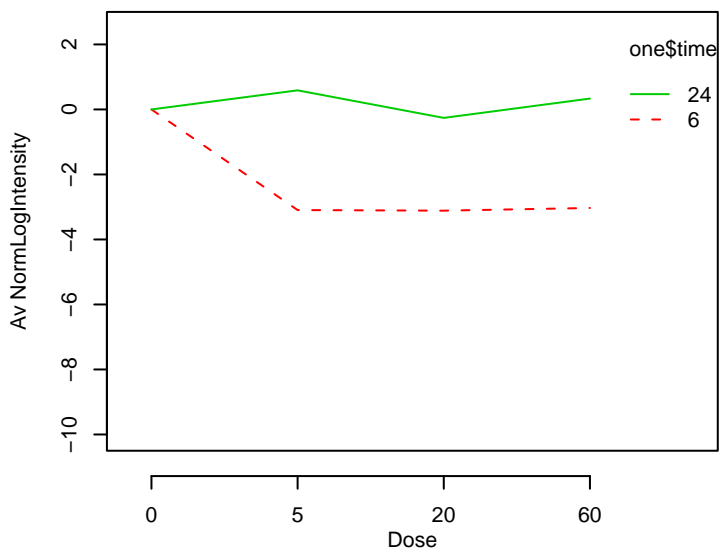

**GO\_0051240 : positive regulation of organismal physiological**

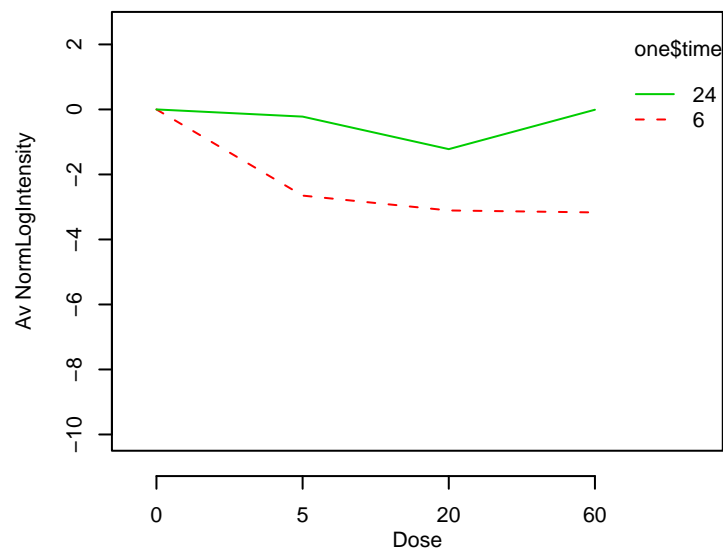

**GO\_0051241 : negative regulation of organismal physiological**

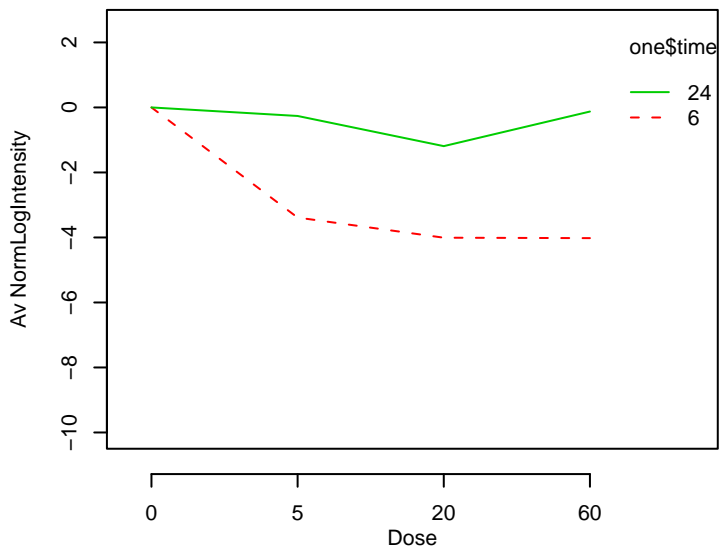

**GO\_0051247 : positive regulation of protein metabolism**

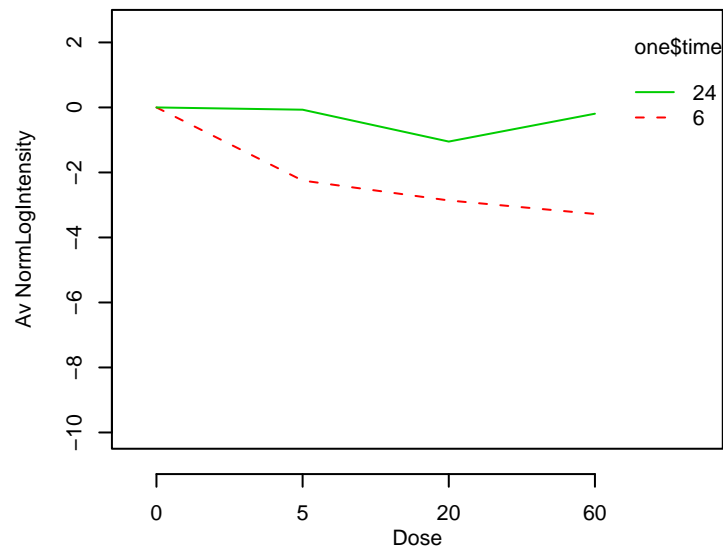

**GO\_0051248 : negative regulation of protein metabolism**

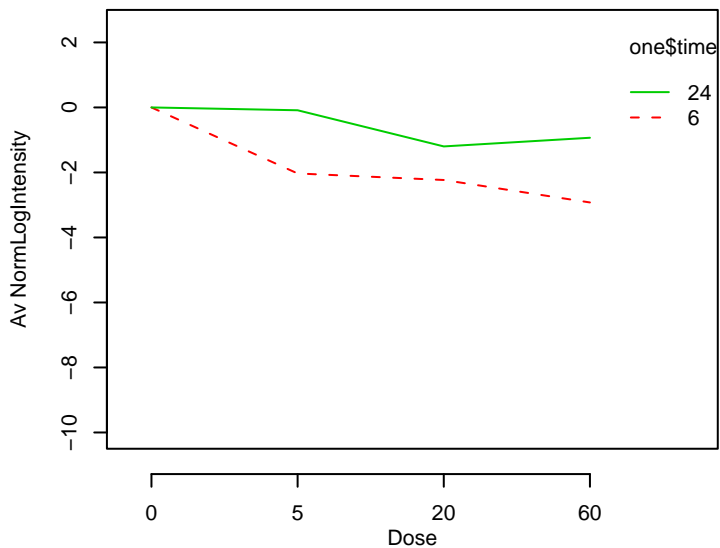

**GO\_0051249 : regulation of lymphocyte activation**

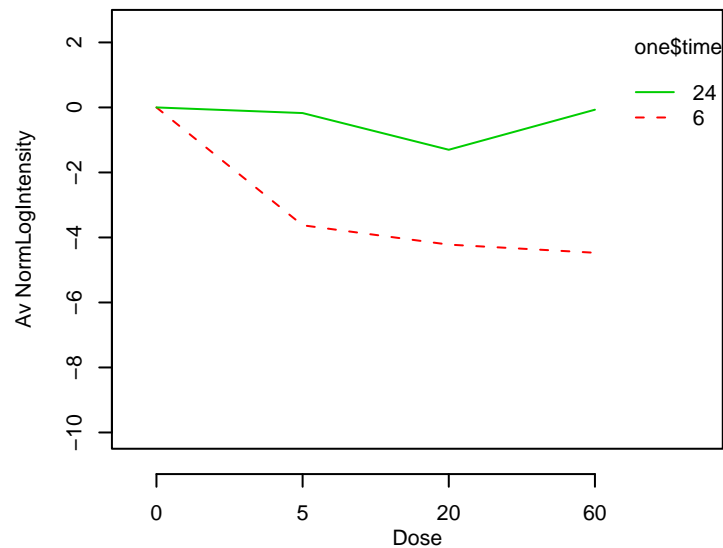

**GO\_0051250 : negative regulation of lymphocyte activation**

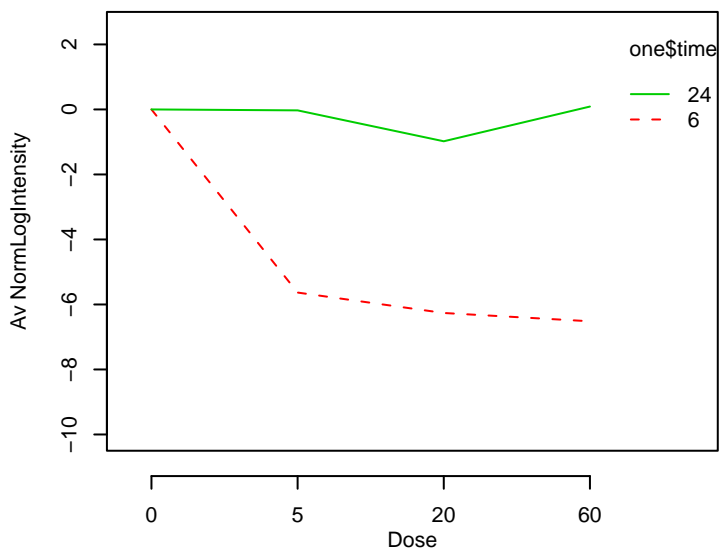

**GO\_0051251 : positive regulation of lymphocyte activation**

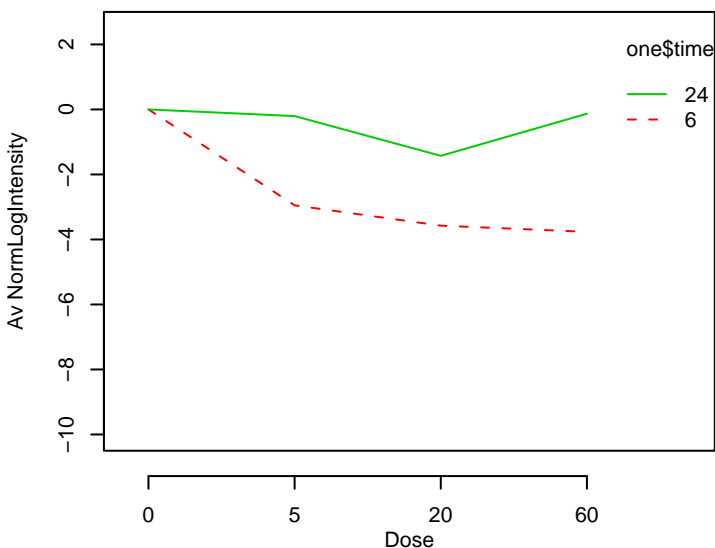

**GO\_0051252 : regulation of RNA metabolism**

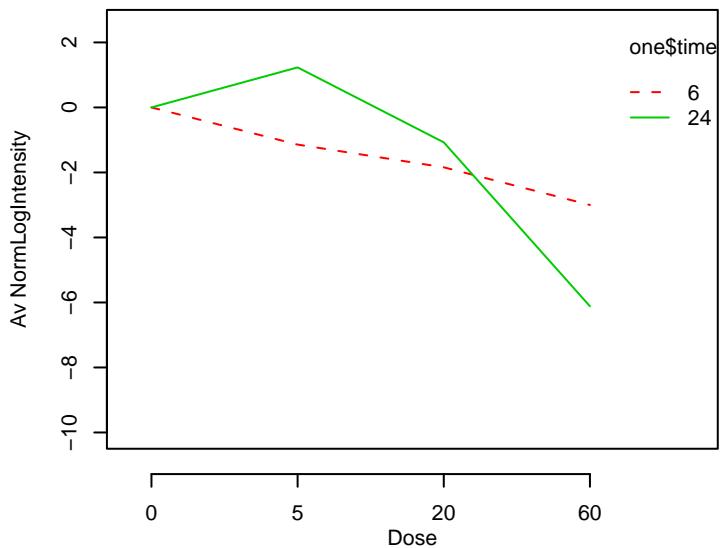

**GO\_0051258 : protein polymerization**

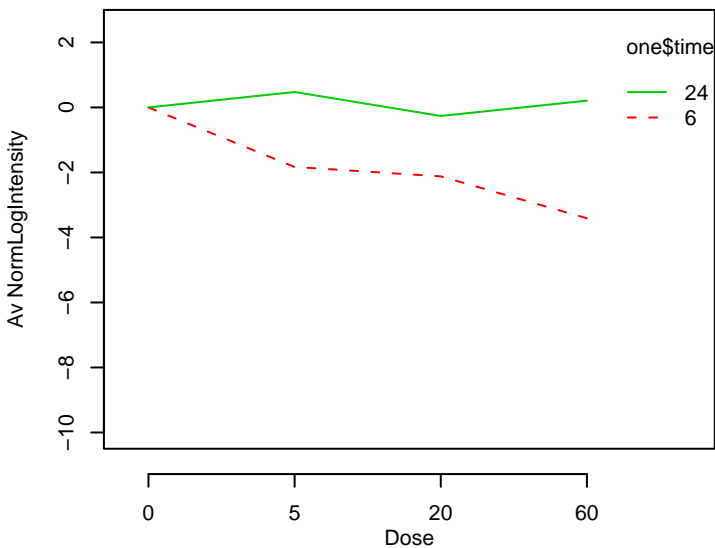

**GO\_0051259 : protein oligomerization**

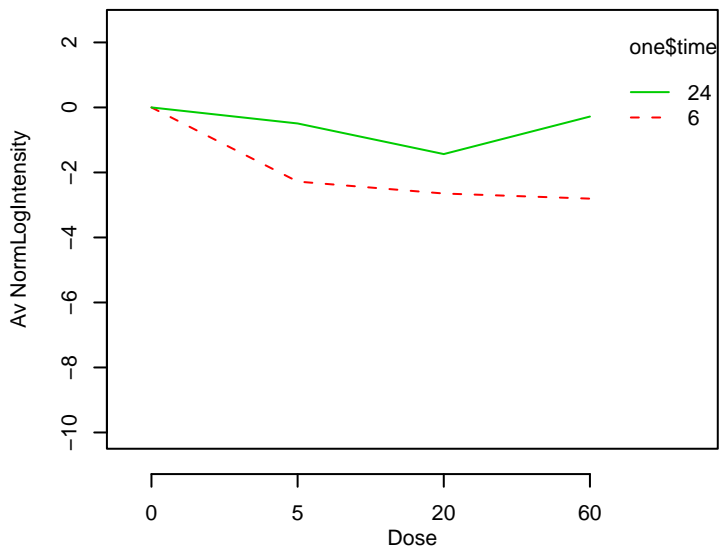

**GO\_0051260 : protein homooligomerization**

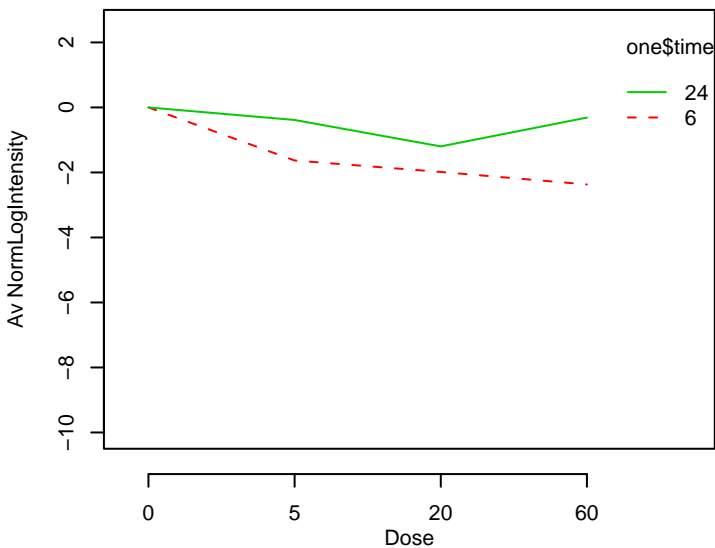

**GO\_0051261 : protein depolymerization**

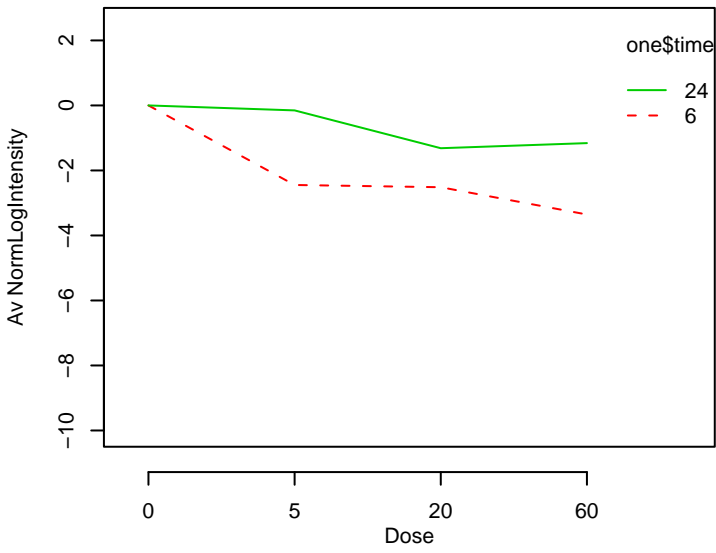

**GO\_0051262 : protein tetramerization**

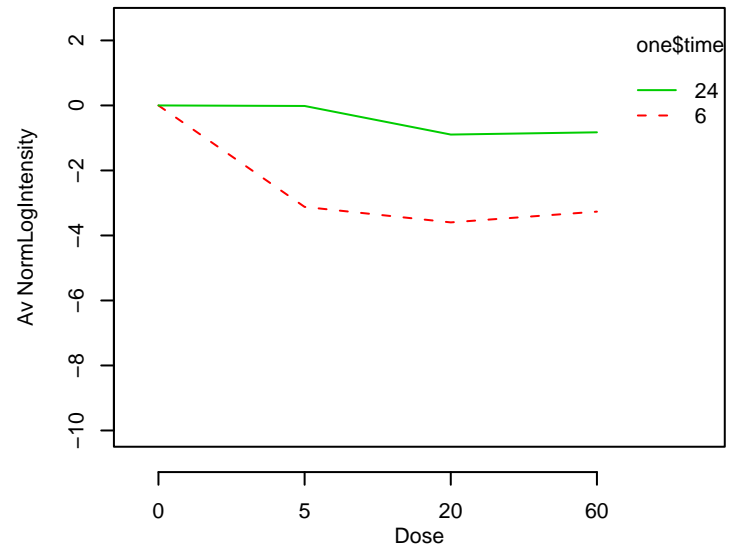

**GO\_0051270 : regulation of cell motility**

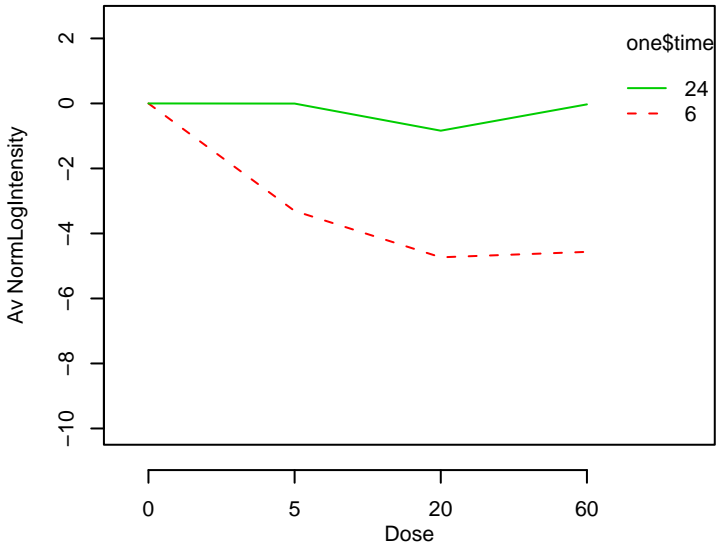

**GO\_0051271 : negative regulation of cell motility**

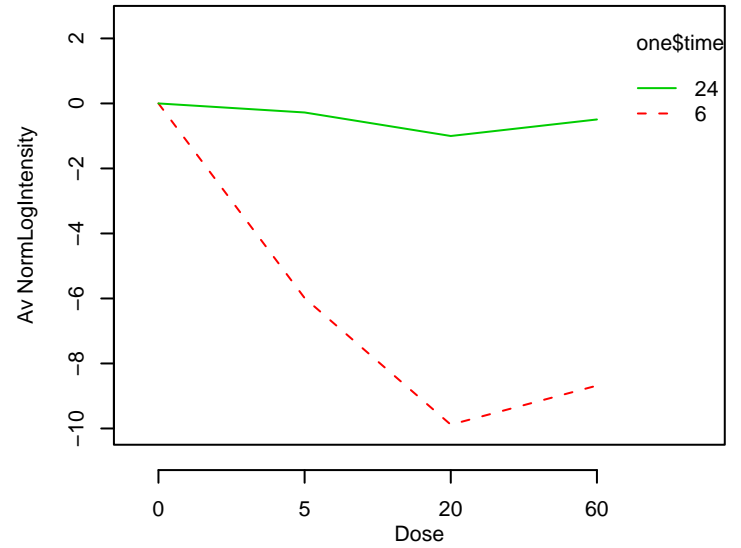

**GO\_0051272 : positive regulation of cell motility**

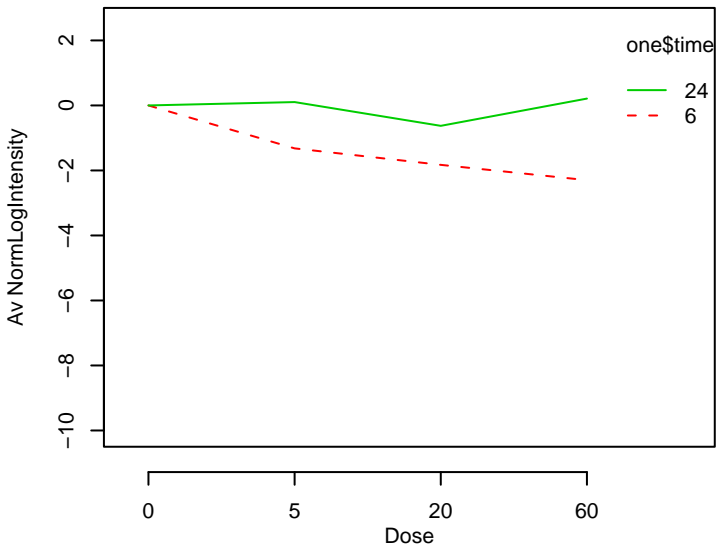

**GO\_0051289 : protein homotetramerization**

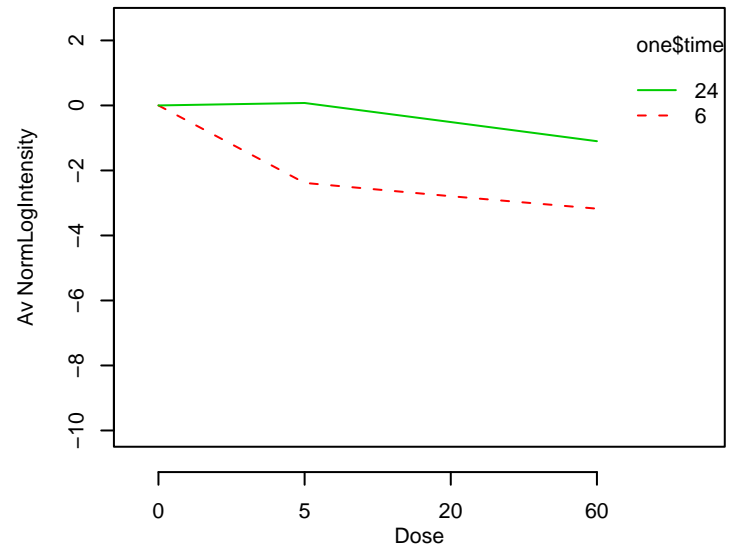

**GO\_0051291 : protein heterooligomerization**

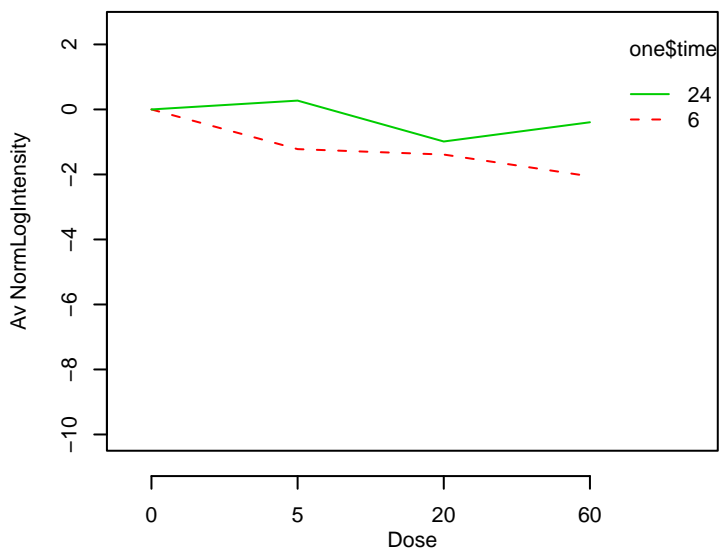

**GO\_0051297 : centrosome organization and biogenesis**

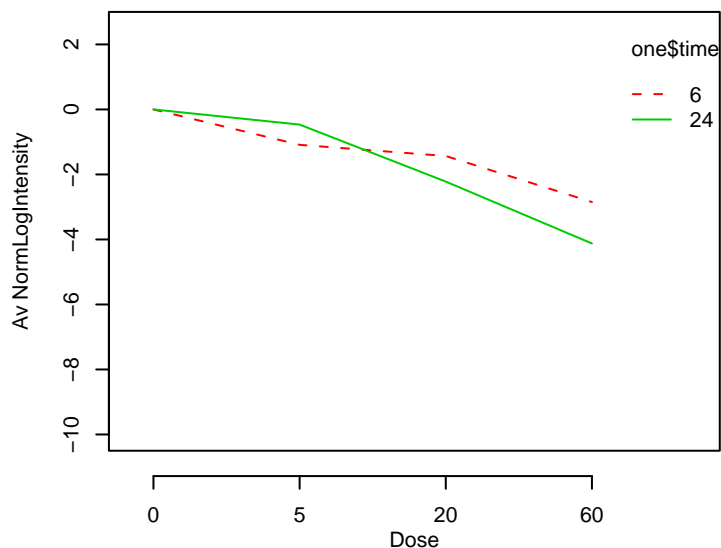

**GO\_0051298 : centrosome duplication**

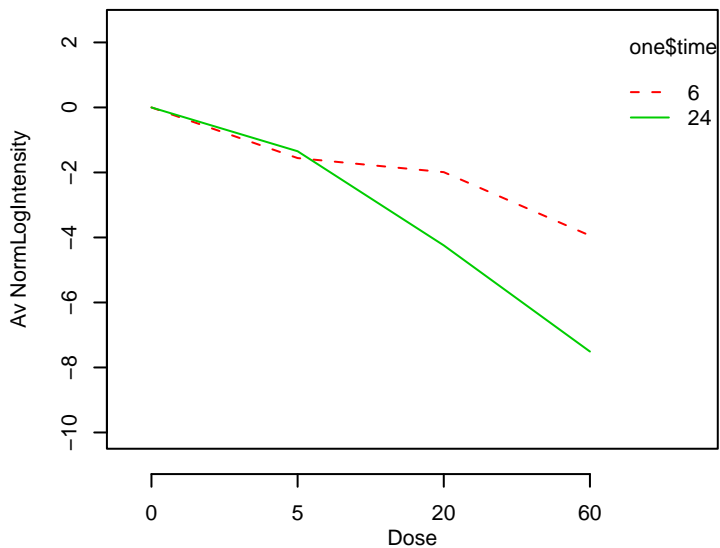

**GO\_0051301 : cell division**

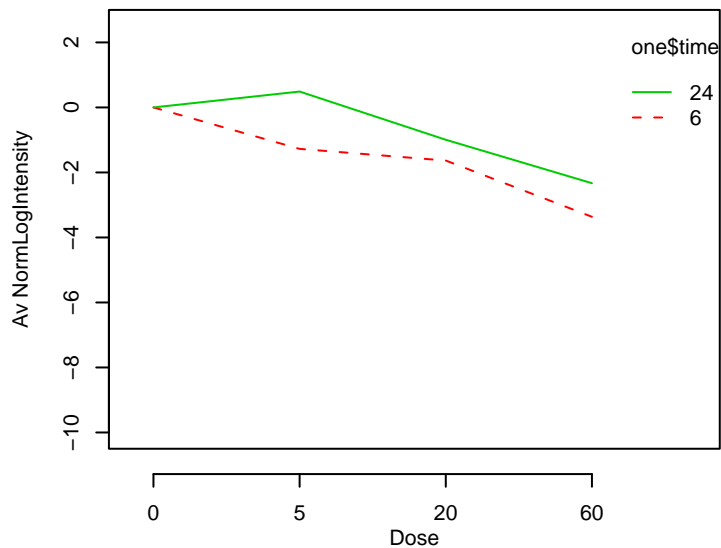

**GO\_0051318 : G1 phase**

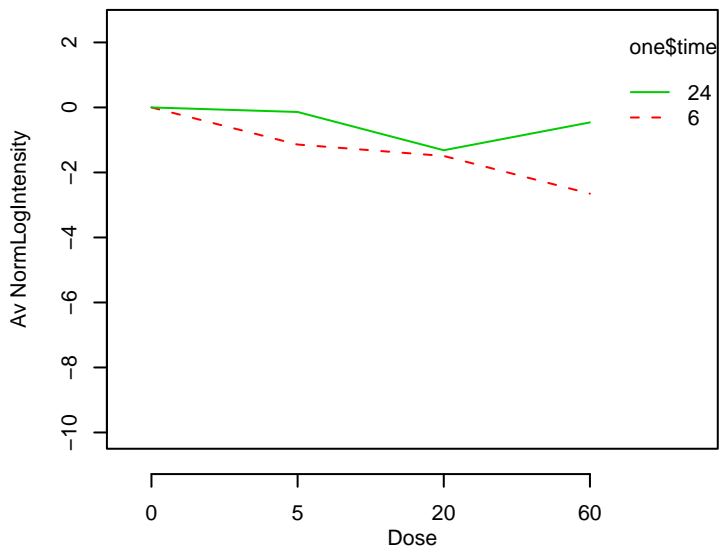

**GO\_0051319 : G2 phase**

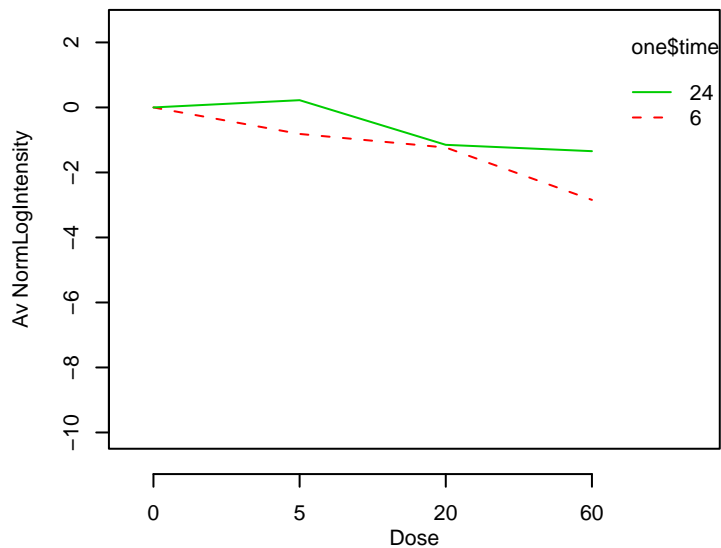

**GO\_0051320 : S phase**

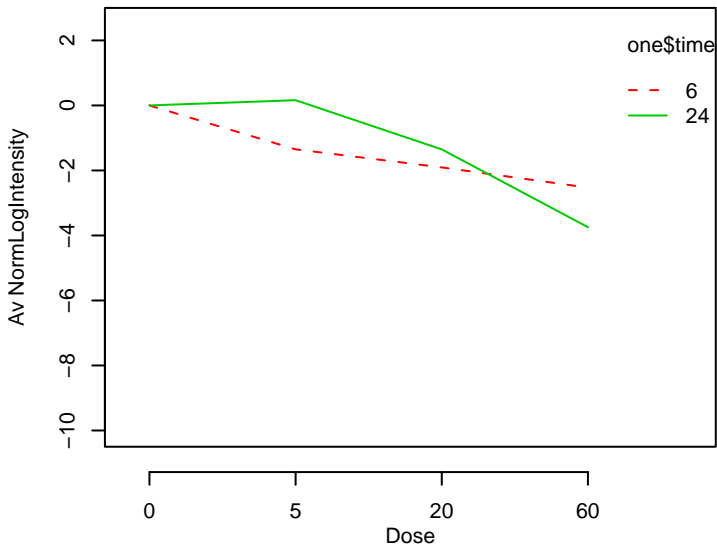

**GO\_0051321 : meiotic cell cycle**

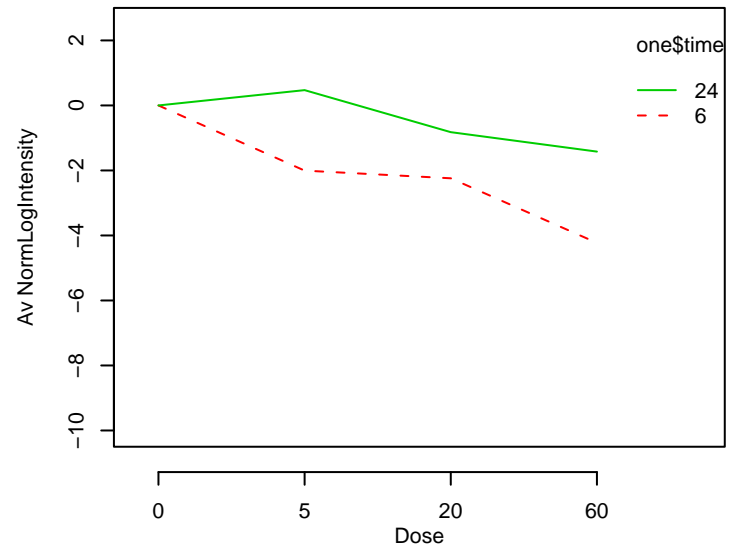

**GO\_0051322 : anaphase**

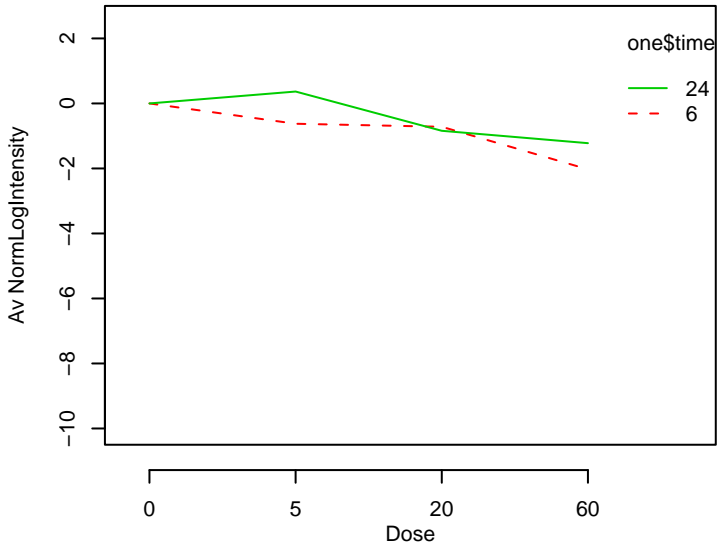

**GO\_0051324 : prophase**

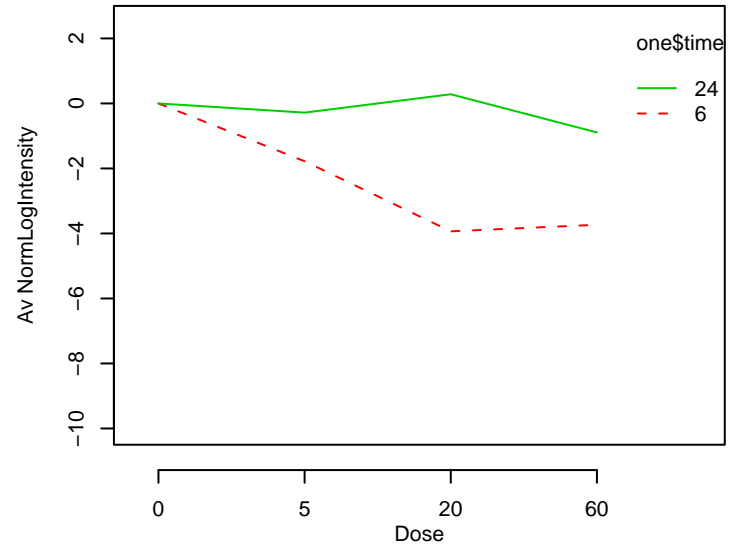

**GO\_0051325 : interphase**

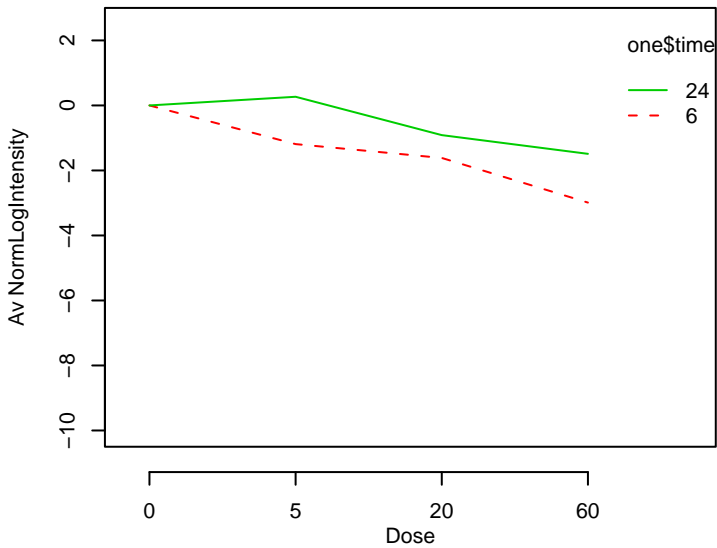

**GO\_0051327 : M phase of meiotic cell cycle**

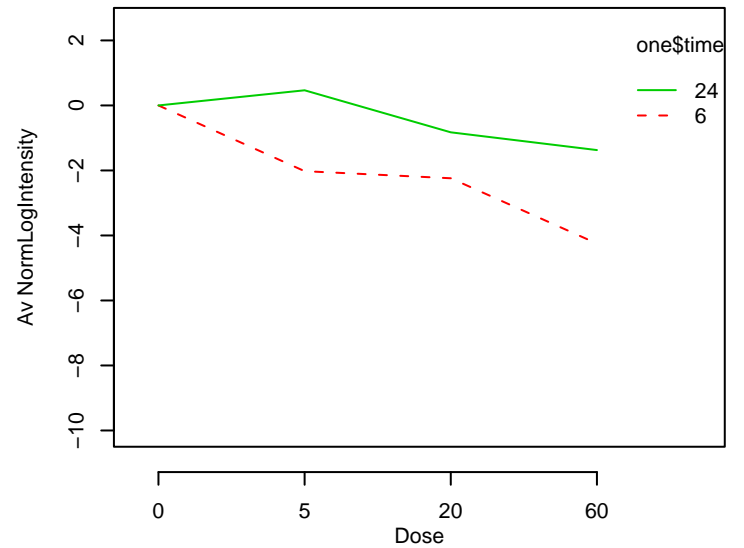

**GO\_0051329 : interphase of mitotic cell cycle**

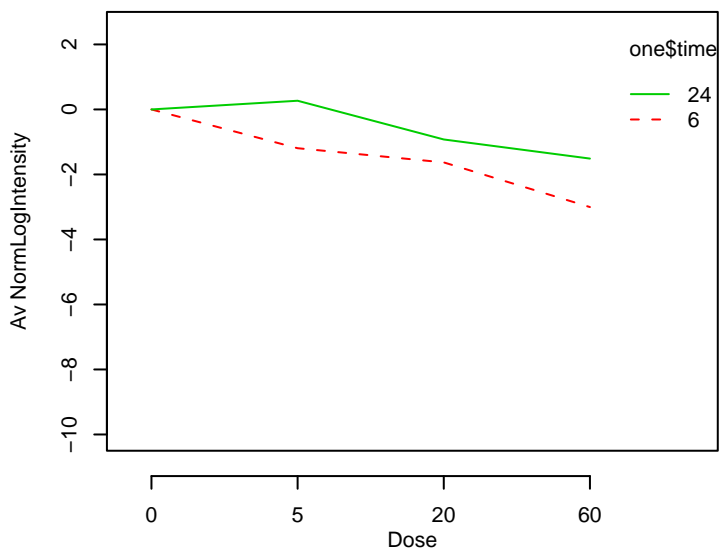

**GO\_0051336 : regulation of hydrolase activity**

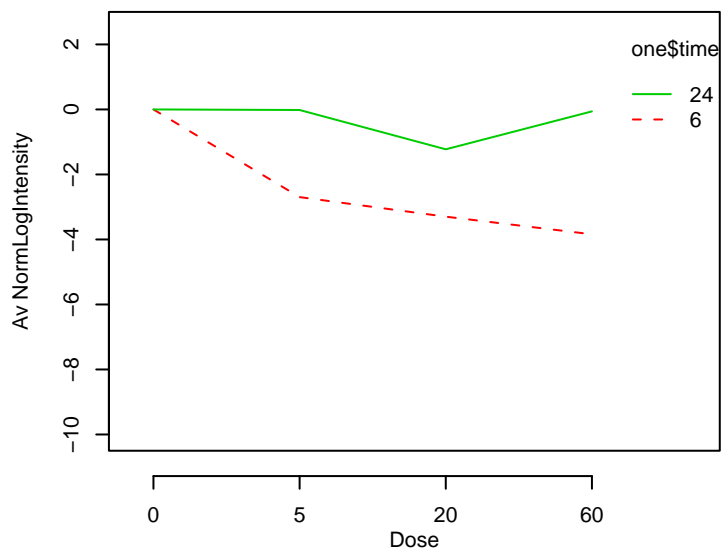

**GO\_0051338 : regulation of transferase activity**

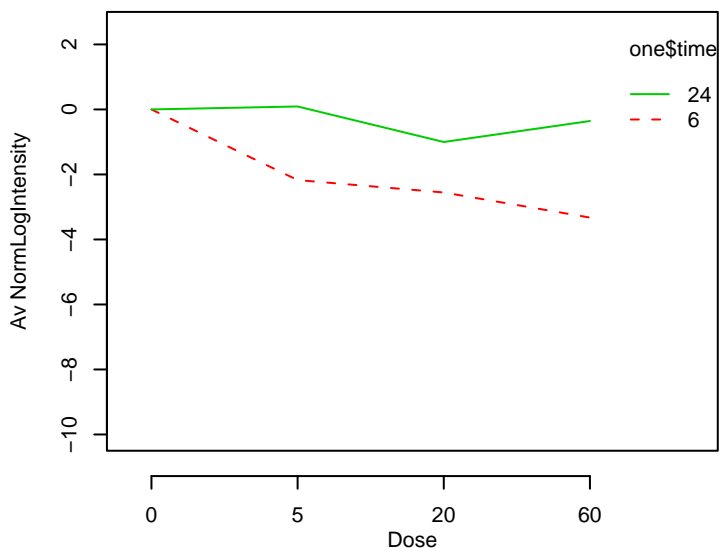

**GO\_0051339 : regulation of lyase activity**

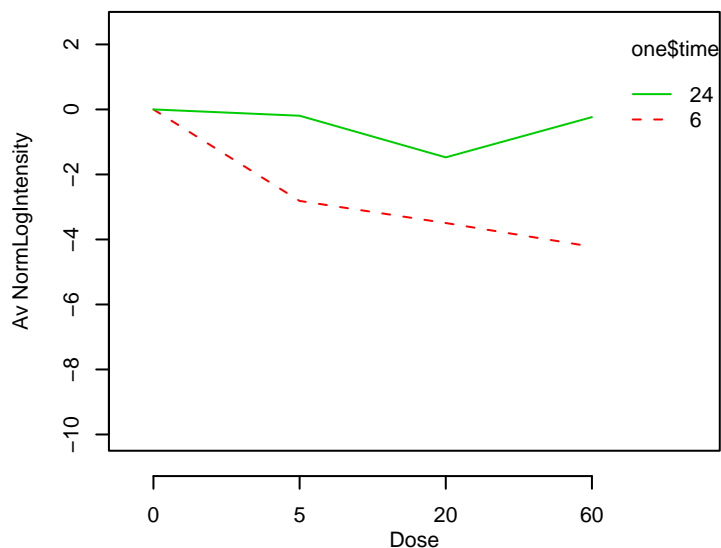

**GO\_0051341 : regulation of oxidoreductase activity**

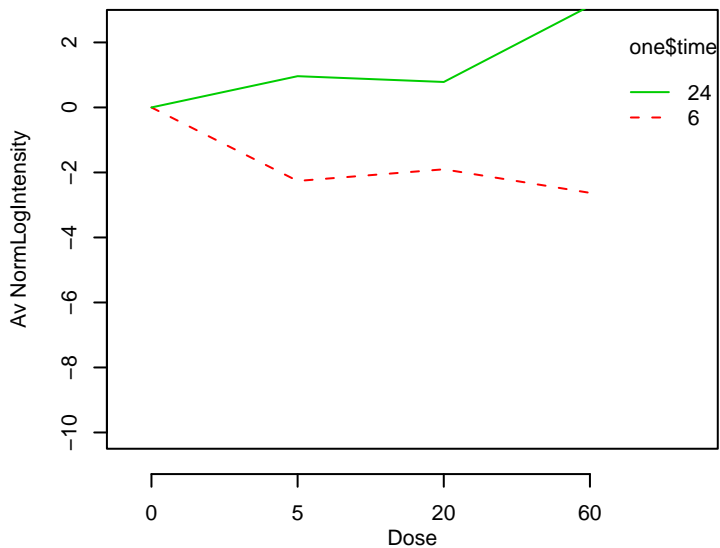

**GO\_0051345 : positive regulation of hydrolase activity**

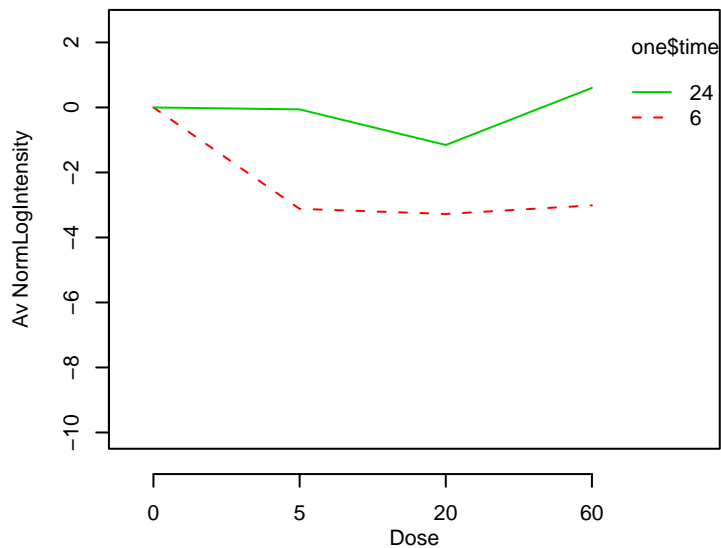

**GO\_0051347 : positive regulation of transferase activity**

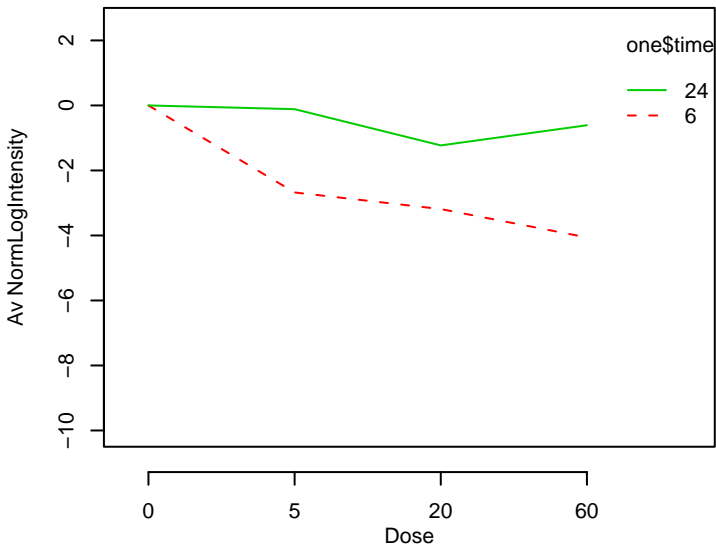

**GO\_0051348 : negative regulation of transferase activity**

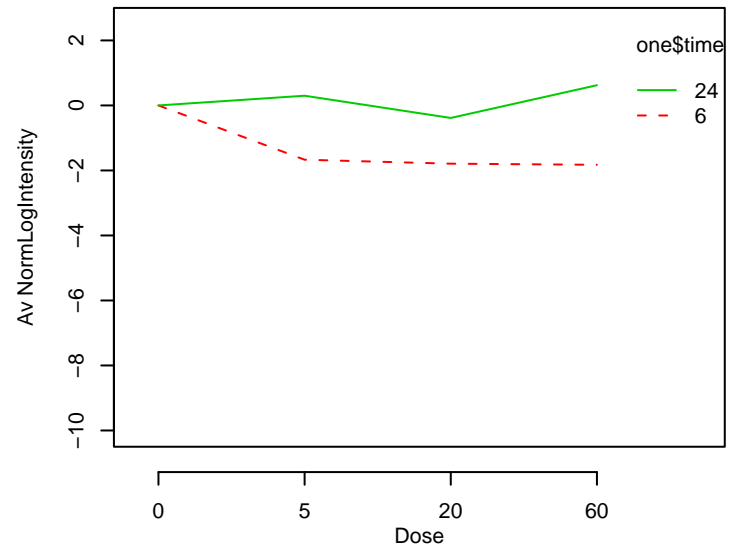

**GO\_0051349 : positive regulation of lyase activity**

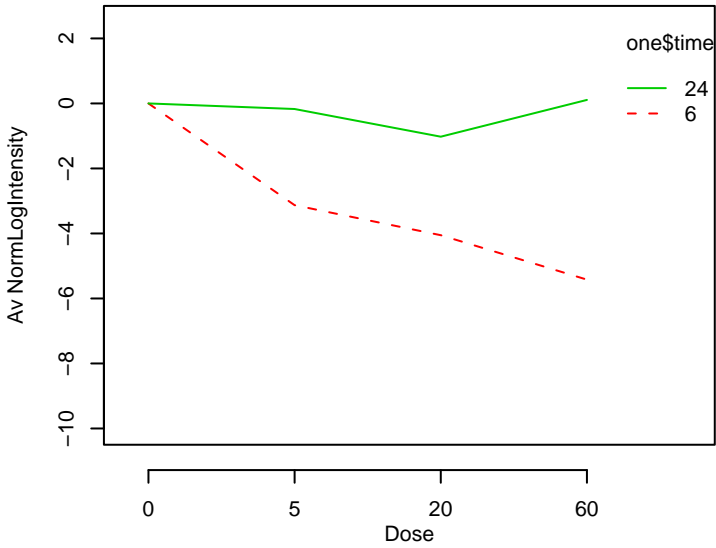

**GO\_0051350 : negative regulation of lyase activity**

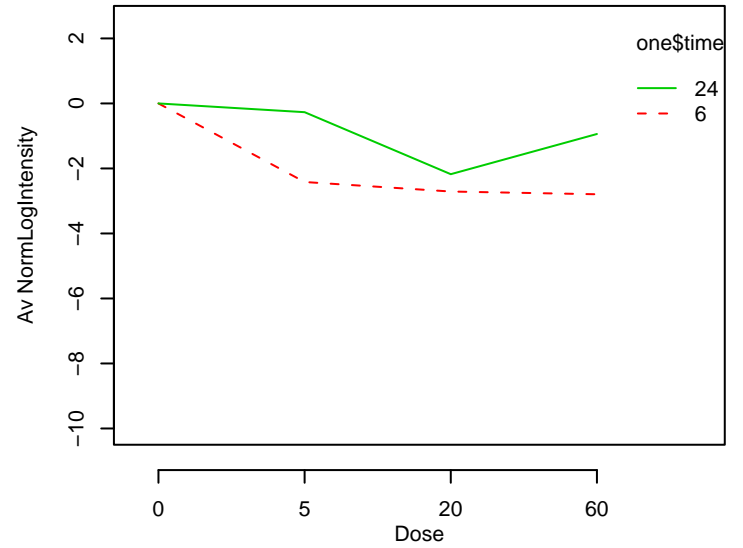

**GO\_0051402 : neuron apoptosis**

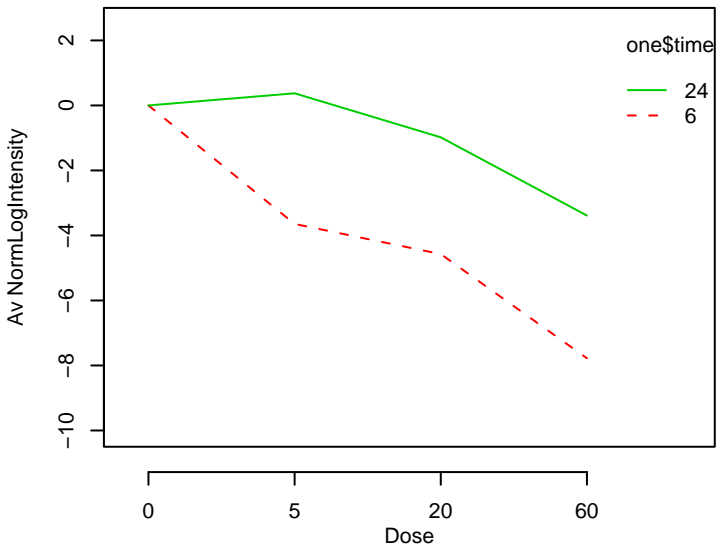

**GO\_0051452 : cellular pH reduction**

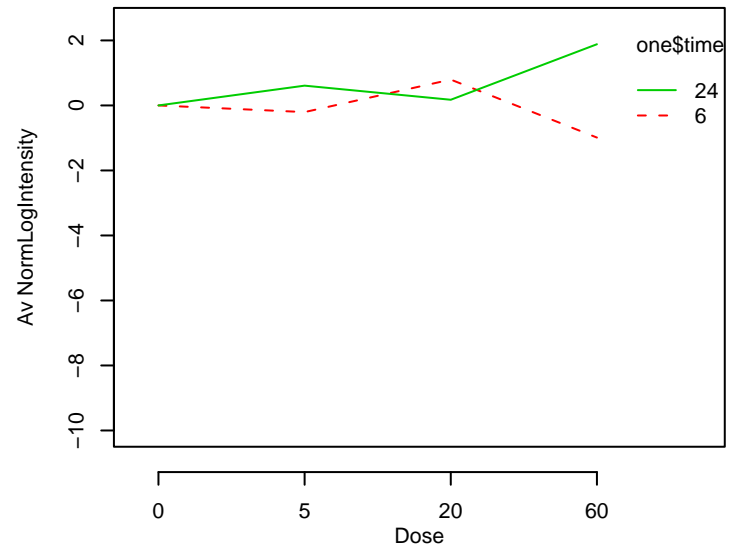



**GO\_0051453 : regulation of cellular pH**

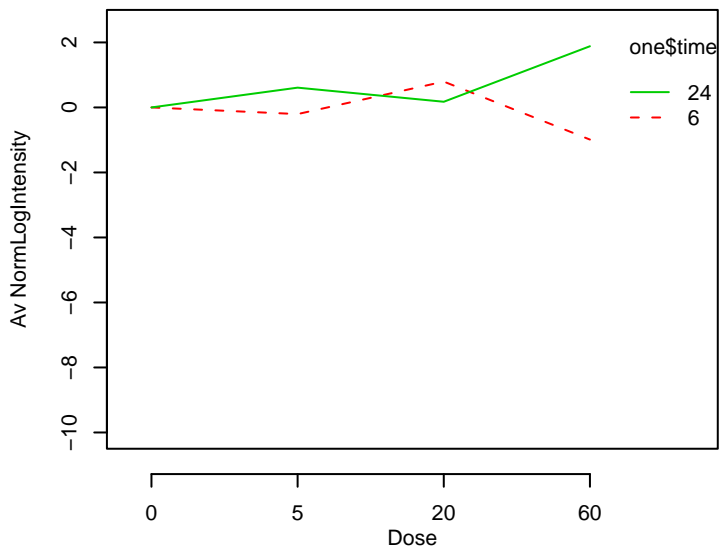

**GO\_0051480 : cytosolic calcium ion homeostasis**

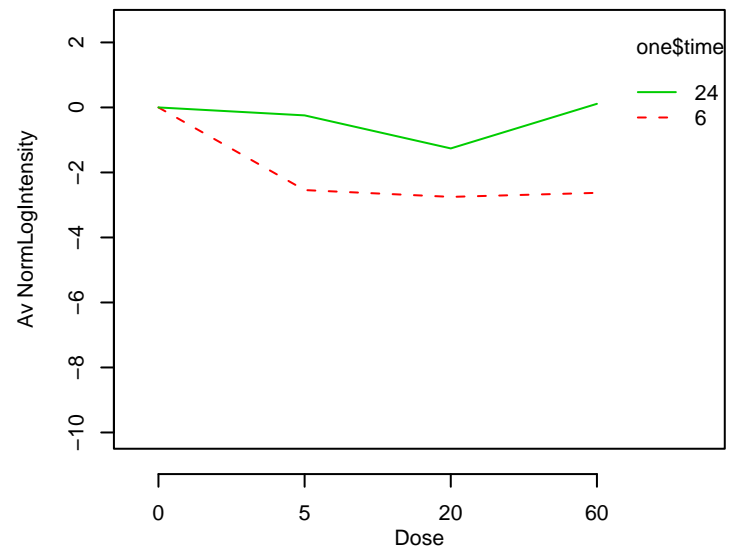

**GO\_0051603 : proteolysis during cellular protein catabolism**

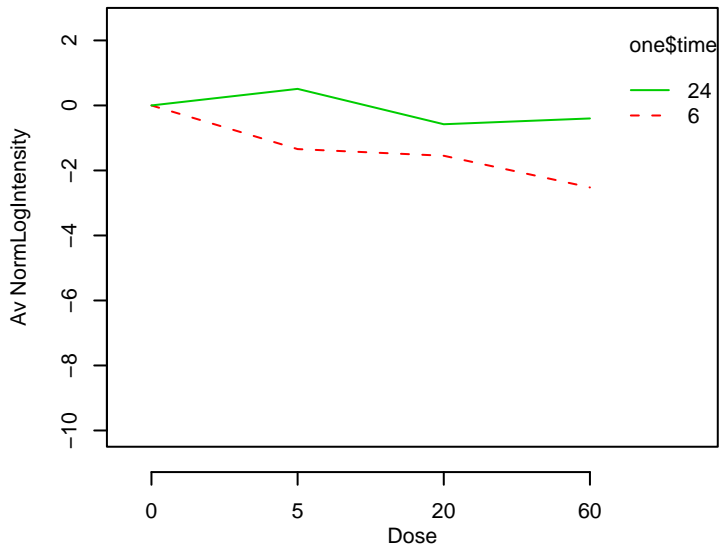

**GO\_0051604 : protein maturation**

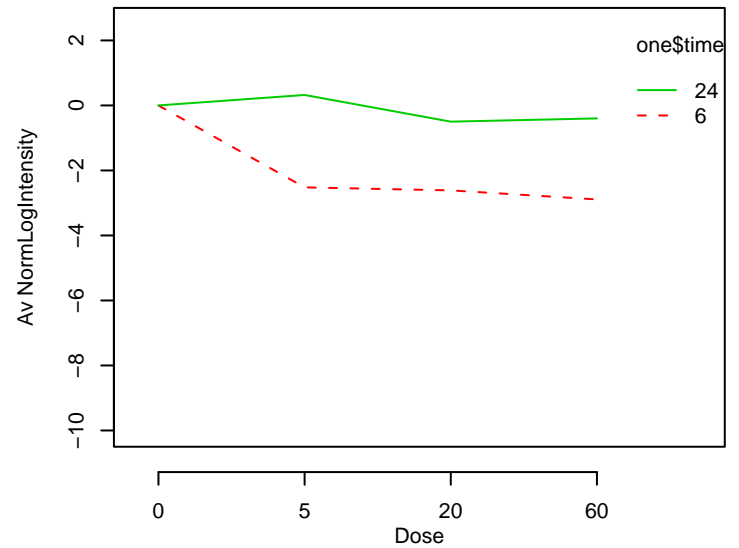

**GO\_0051606 : detection of stimulus**

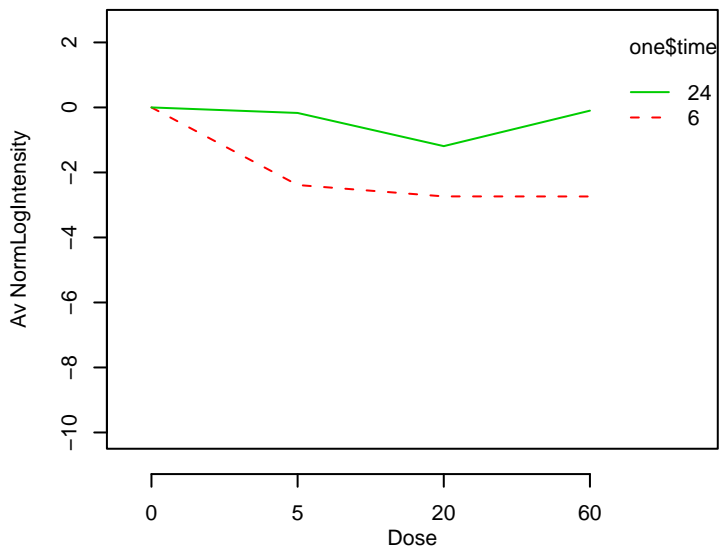

**GO\_0051607 : defense response to virus**

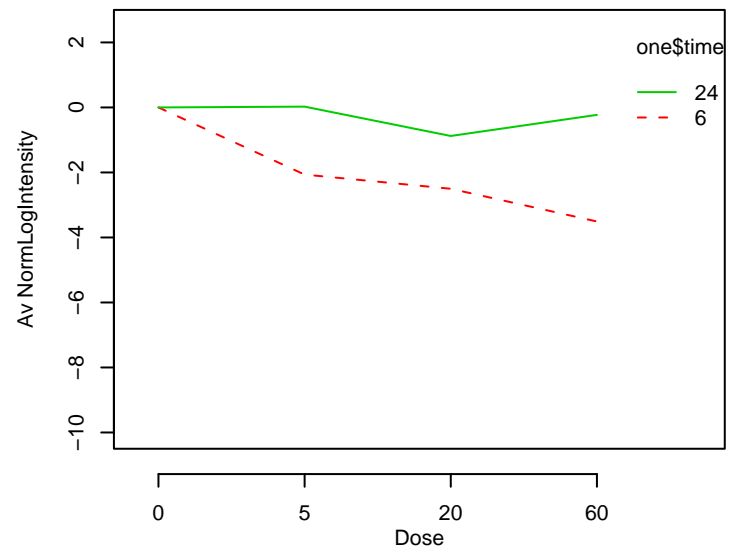

**GO\_0051640 : organelle localization**

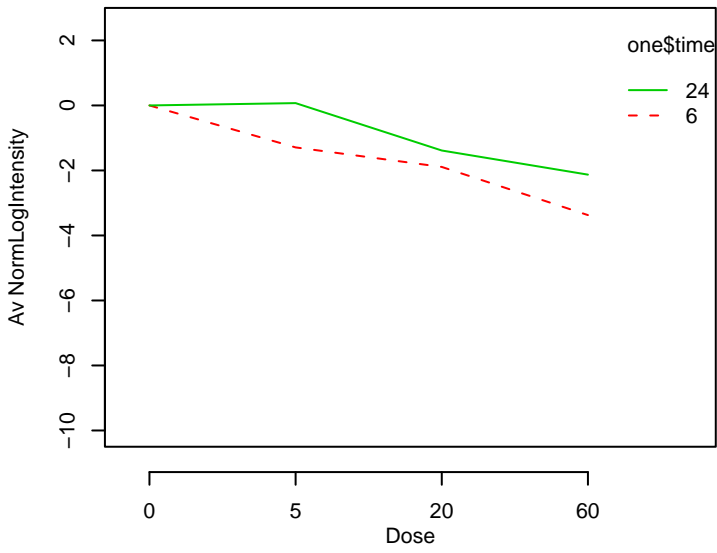

**GO\_0051647 : nucleus localization**

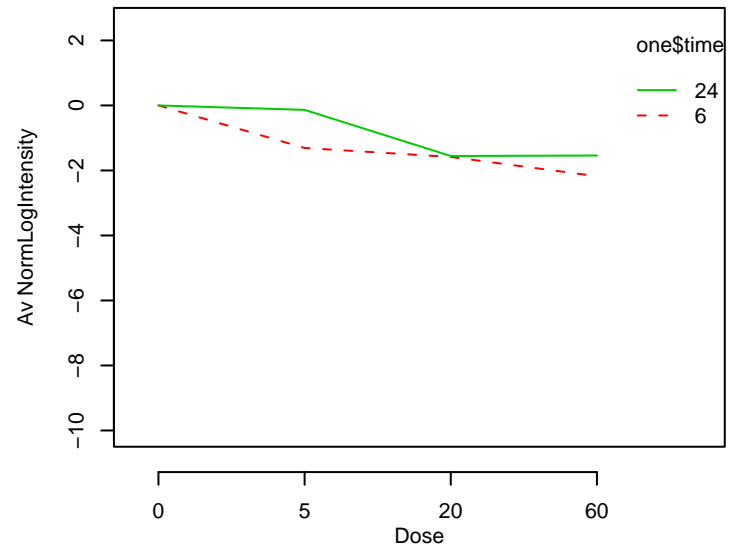

**GO\_0051656 : establishment of organelle localization**

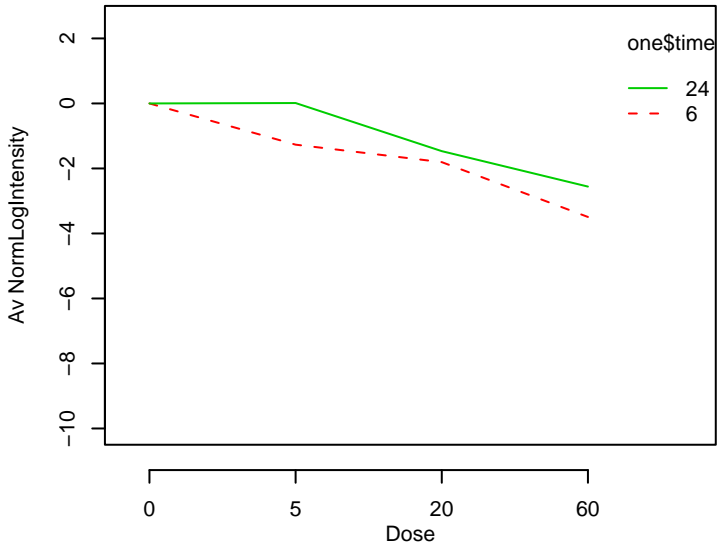

**GO\_0051668 : localization within membrane**

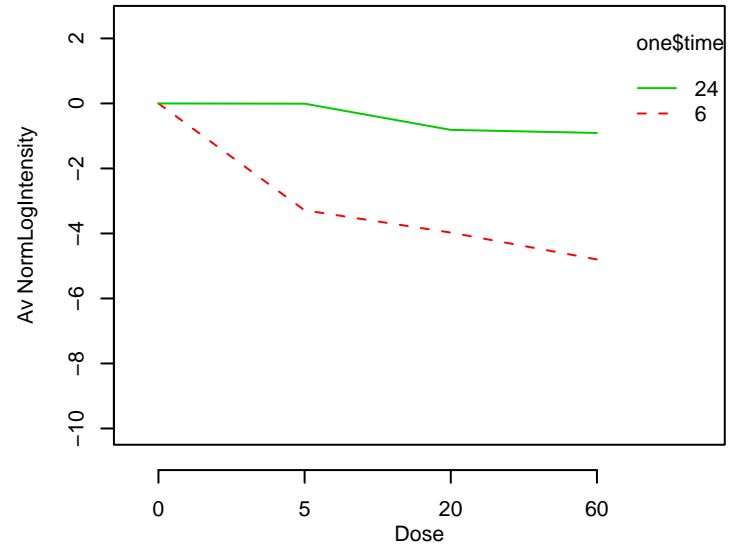

**GO\_0051693 : actin filament capping**

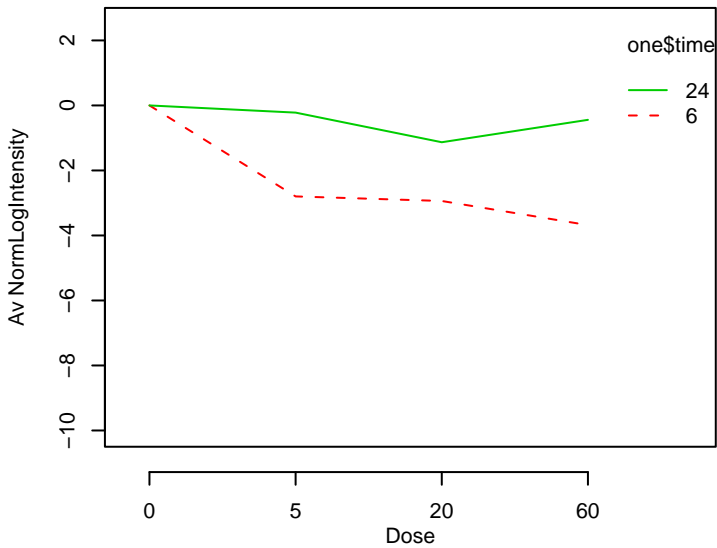

**GO\_0051701 : interaction with host**

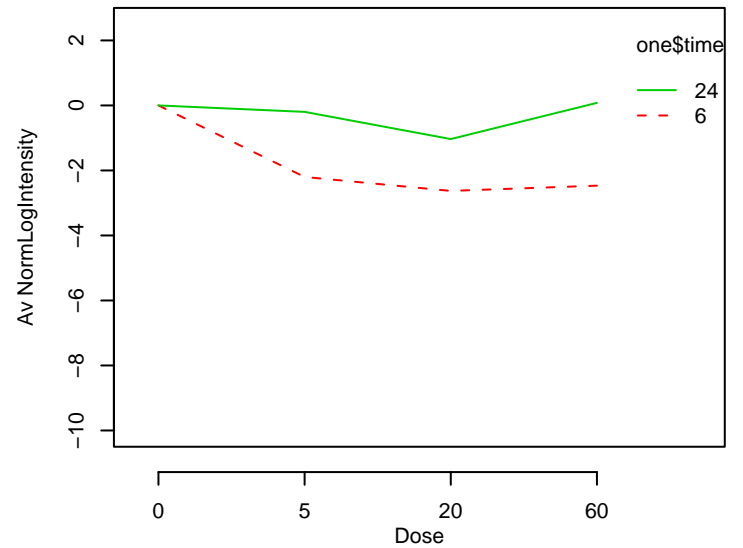

**GO\_0051704 : interaction between organisms**

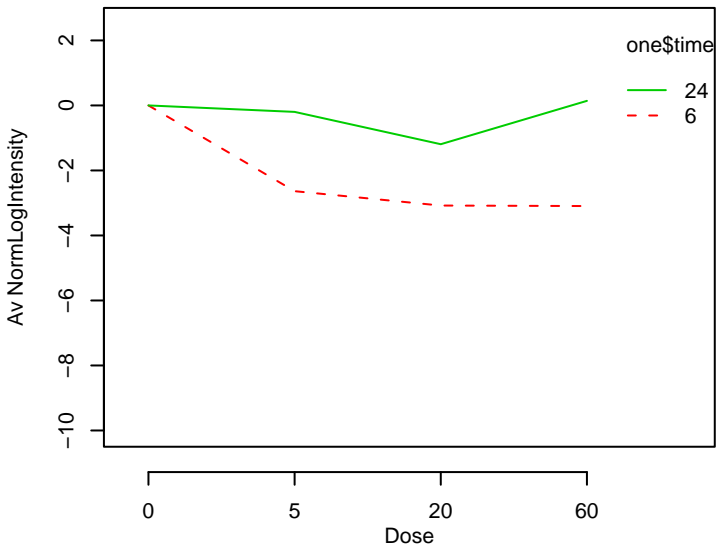

**GO\_0051705 : behavioral interaction between organisms**

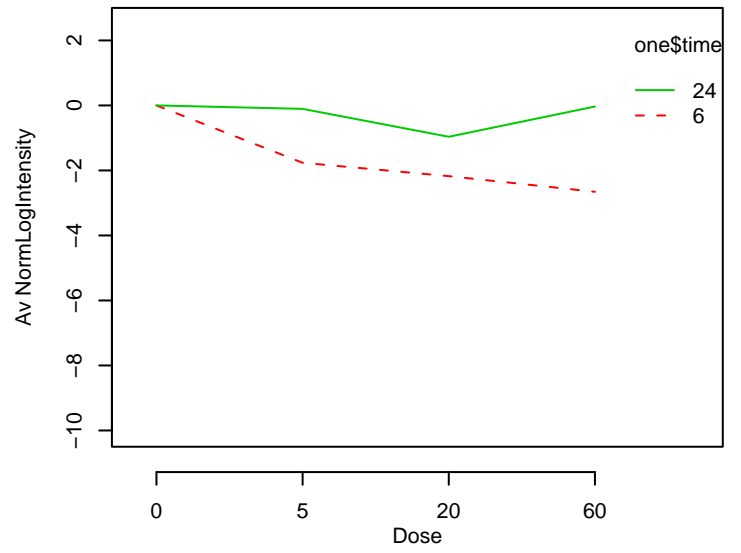

**GO\_0051706 : physiological interaction between organism**

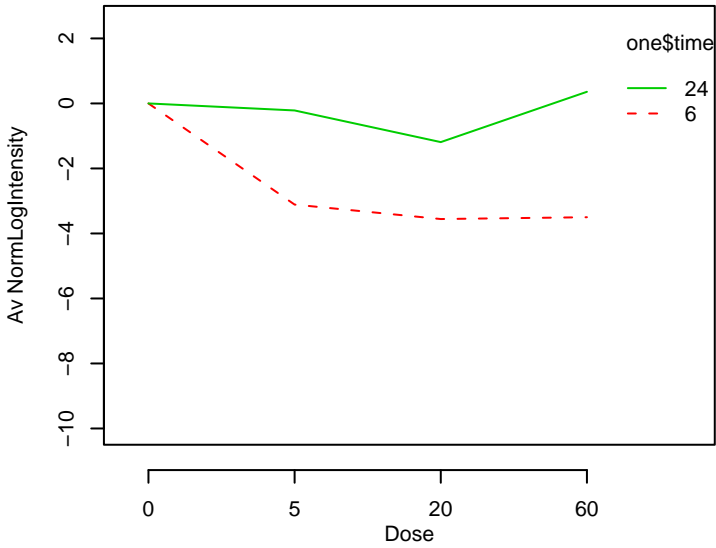

**GO\_0051716 : cellular response to stimulus**

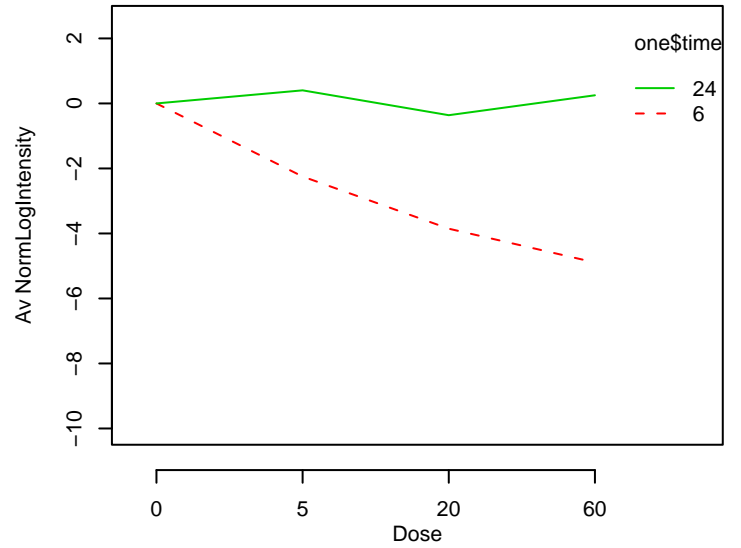

**GO\_0051789 : response to protein stimulus**

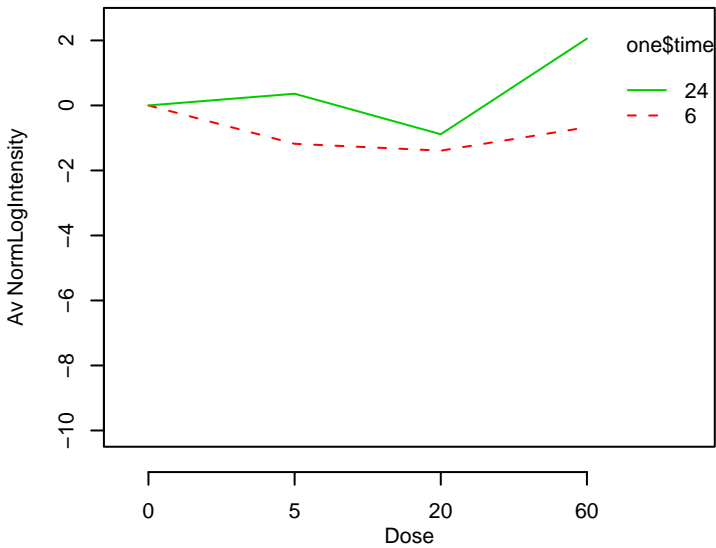

**GO\_0051806 : entry into cell of other organism during symbi**

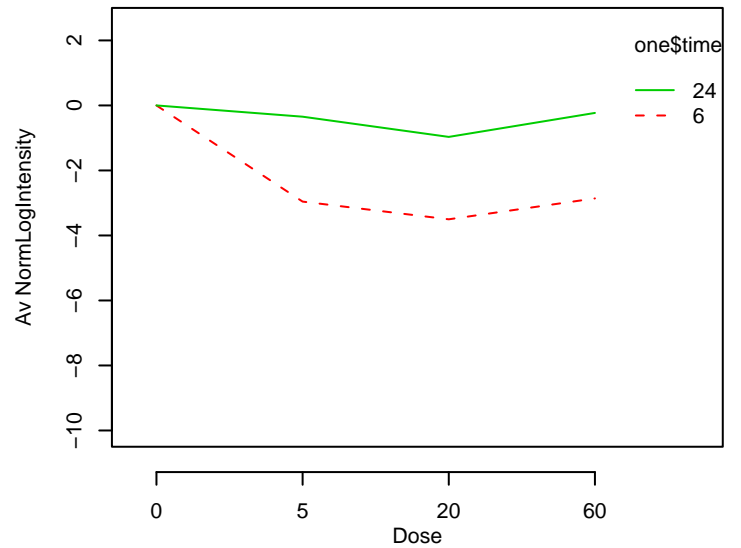

**GO\_0051828 : entry into other organism during symbiotic int**

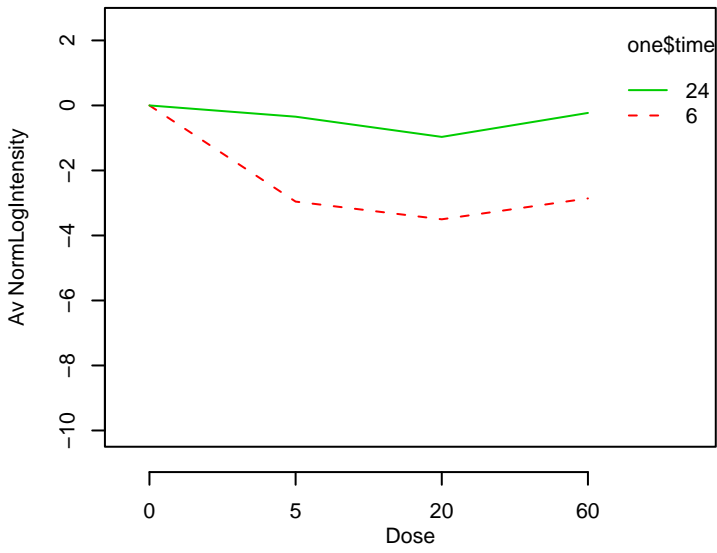

**GO\_0051923 : sulfation**

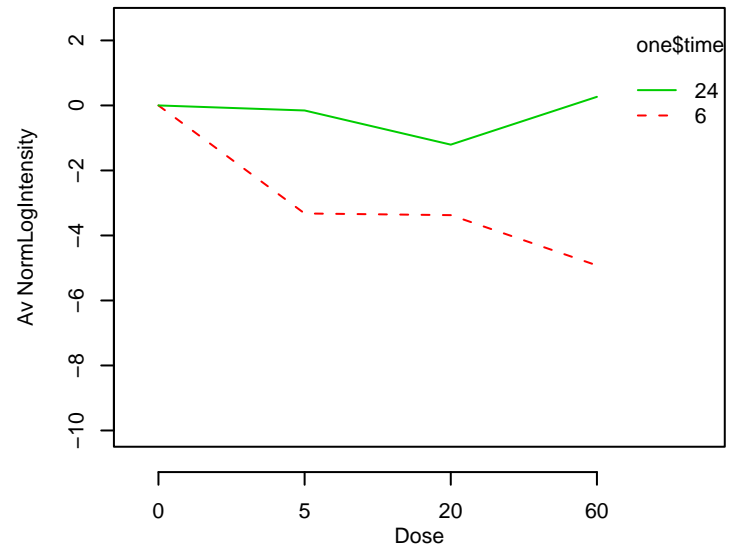

**GO\_0051924 : regulation of calcium ion transport**

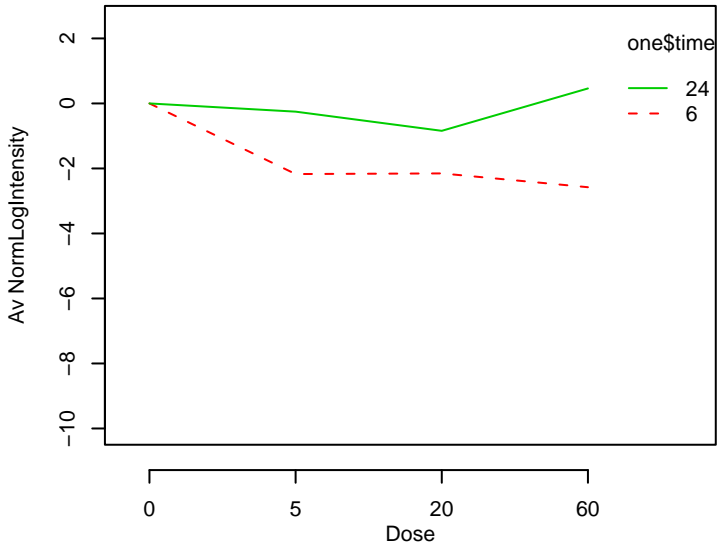

**GO\_0051969 : regulation of transmission of nerve impulses**



Supplement: pgen.1000115.s001.pdf [file pgen.1000115.s001.pdf]
