# Supplementary material for: An Integrated Approach for the Analysis of Biological Pathways using Mixed Models
Source: PLoS Genet. 2008 Jul 4;4(7):e1000115. doi: 10.1371/journal.pgen.1000115 (PMC2565842; doi:10.1371/journal.pgen.1000115)
Supplement: Table S1 — Supplementary table for HNE data. (0.24 MB XLS) [file pgen.1000115.s002.xls]

## Sheet: doselin.gobp.golden.10.200.4r.a
Supplemental Table for HNE Data
pathway	pathway_long	count	intxn p value	intxn_FDR	bothtimes	bothtimes_FDR	time6	time6_FDR	time24	time24_FDR
GO_0008033	tRNA processing	46	0.0062	0.231576	0.0006	0.00783529	0.0001	0.00888	0.4208	0.9985
GO_0051220	cytoplasmic sequestering of protein	9	0.001	0.231576	0.0298	0.0778306	0.0004	0.0158571	0.2528	0.959344
GO_0042992	negative regulation of transcription factor import	10	0.0014	0.231576	0.034	0.0816	0.0005	0.0158571	0.2854	0.9985
GO_0051716	cellular response to stimulus	10	0.0039	0.231576	0.0055	0.0257053	0.0003	0.0158571	0.9099	0.9985
GO_0051349	positive regulation of lyase activity	20	0.0046	0.231576	0.0091	0.034831	0.0004	0.0158571	0.8141	0.9985
GO_0001890	placenta development	14	0.0097	0.231576	0.0192	0.0576	0.0013	0.0160333	0.8145	0.9985
GO_0009636	response to toxin	12	0.004	0.231576	0.0543	0.103919	0.0015	0.0170769	0.3697	0.9985
GO_0006171	cAMP biosynthesis	18	0.0069	0.231576	0.1348	0.181771	0.0045	0.0240282	0.29	0.9985
GO_0009219	pyrimidine deoxyribonucleotide metabolism	8	0.0049	0.231576	0.0003	0.00605455	0.3236	0.329351	0	0
GO_0051656	establishment of organelle localization	14	0.6388	0.688416	0	0	0.0001	0.00888	0.0005	0.0317143
GO_0007093	mitotic checkpoint	18	0.9876	0.989829	0	0	0.0009	0.0160333	0.0009	0.0348857
GO_0046112	nucleobase biosynthesis	10	0.093	0.234347	0.0001	0.00403636	0.0001	0.00888	0.0224	0.202971
GO_0006364	rRNA processing	50	0.0984	0.234347	0.0001	0.00403636	0.0001	0.00888	0.0192	0.183268
GO_0006298	mismatch repair	18	0.1775	0.272853	0.0001	0.00403636	0.0106	0.030561	0.0002	0.0222
GO_0043523	regulation of neuron apoptosis	15	0.2159	0.304196	0.0001	0.00403636	0.0004	0.0158571	0.0148	0.157514
GO_0006270	DNA replication initiation	25	0.4058	0.479189	0.0001	0.00403636	0.0081	0.0287712	0.0007	0.0348857
GO_0007091	mitotic metaphase/anaphase transition	11	0.5332	0.594826	0.0001	0.00403636	0.0007	0.0160333	0.0046	0.0658839
GO_0006613	cotranslational protein targeting to membrane	11	0.7159	0.755011	0.0001	0.00403636	0.0042	0.02331	0.0014	0.0365647
GO_0000910	cytokinesis	27	0.7705	0.801176	0.0001	0.00403636	0.0009	0.0160333	0.0021	0.03885
GO_0006541	glutamine metabolism	16	0.8231	0.84401	0.0001	0.00403636	0.002	0.019425	0.001	0.0348857
GO_0006360	transcription from RNA polymerase I promoter	10	0.0214	0.231576	0.0002	0.00493333	0.0001	0.00888	0.1274	0.680271
GO_0007006	mitochondrial membrane organization and biogenesis	12	0.0878	0.234347	0.0002	0.00493333	0.0003	0.0158571	0.0551	0.388324
GO_0007052	mitotic spindle organization and biogenesis	15	0.3105	0.389441	0.0002	0.00493333	0.0166	0.0385885	0.0008	0.0348857
GO_0000082	G1/S transition of mitotic cell cycle	36	0.4457	0.518039	0.0002	0.00493333	0.001	0.0160333	0.0097	0.119633
GO_0000059	protein import into nucleus\, docking	17	0.6449	0.693307	0.0002	0.00493333	0.0073	0.0287712	0.0019	0.03885
GO_0006376	mRNA splice site selection	17	0.6877	0.730476	0.0002	0.00493333	0.002	0.019425	0.0066	0.0861882
GO_0045884	regulation of survival gene product activity	14	0.9116	0.917801	0.0002	0.00493333	0.0039	0.02331	0.0028	0.049728
GO_0007076	mitotic chromosome condensation	10	0.0184	0.231576	0.0003	0.00605455	0.1584	0.168656	0.0001	0.0222
GO_0051053	negative regulation of DNA metabolism	12	0.038	0.231576	0.0003	0.00605455	0.0999	0.111727	0.0002	0.0222
GO_0006268	DNA unwinding during replication	15	0.3141	0.392846	0.0003	0.00605455	0.0219	0.0422765	0.0011	0.0348857
GO_0000018	regulation of DNA recombination	10	0.075	0.231576	0.0004	0.00657778	0.0831	0.0963352	0.0004	0.0296
GO_0009451	RNA modification	21	0.2806	0.36217	0.0004	0.00657778	0.0274	0.0482156	0.0011	0.0348857
GO_0000077	DNA damage checkpoint	28	0.4443	0.517767	0.0004	0.00657778	0.0183	0.0402238	0.0019	0.03885
GO_0009119	ribonucleoside metabolism	10	0.4991	0.569667	0.0004	0.00657778	0.0158	0.0377519	0.0021	0.03885
GO_0006099	tricarboxylic acid cycle	20	0.799	0.825014	0.0004	0.00657778	0.0079	0.0287712	0.0037	0.0586714
GO_0000086	G2/M transition of mitotic cell cycle	12	0.1846	0.277839	0.0005	0.0074	0.0009	0.0160333	0.0467	0.34137
GO_0006611	protein export from nucleus	15	0.2352	0.32207	0.0005	0.0074	0.0011	0.0160333	0.0383	0.304676
GO_0006302	double-strand break repair	23	0.6071	0.663164	0.0005	0.0074	0.0152	0.0370813	0.0034	0.0559111
GO_0000084	S phase of mitotic cell cycle	11	0.1733	0.26935	0.0006	0.00783529	0.0578	0.0743861	0.001	0.0348857
GO_0006275	regulation of DNA replication	17	0.7579	0.791783	0.0006	0.00783529	0.0049	0.0247227	0.0121	0.137754
GO_0006289	nucleotide-excision repair	22	0.8189	0.841647	0.0006	0.00783529	0.0057	0.0255636	0.0112	0.1344
GO_0006284	base-excision repair	26	0.2659	0.346216	0.0007	0.0084	0.0468	0.0643319	0.0017	0.03885
GO_0042375	quinone cofactor metabolism	9	0.6521	0.697668	0.0007	0.0084	0.0045	0.0240282	0.017	0.171545
GO_0005978	glycogen biosynthesis	13	0.7037	0.743911	0.0007	0.0084	0.0162	0.0380571	0.0053	0.0713091
GO_0006100	tricarboxylic acid cycle intermediate metabolism	22	0.571	0.63381	0.0008	0.00934737	0.0224	0.042685	0.0042	0.0643034
GO_0045787	positive regulation of progression through cell cy	15	0.0533	0.231576	0.0009	0.00951429	0.0005	0.0158571	0.1674	0.782375
GO_0010035	response to inorganic substance	14	0.1623	0.265584	0.0009	0.00951429	0.0799	0.0936032	0.0013	0.036075
GO_0000723	telomere maintenance	21	0.6487	0.695707	0.0009	0.00951429	0.0054	0.024975	0.0205	0.189625
GO_0007096	regulation of exit from mitosis	10	0.8687	0.882615	0.0009	0.00951429	0.0083	0.0290173	0.0135	0.14985
GO_0043488	regulation of mRNA stability	8	0.0252	0.231576	0.0013	0.0113176	0.3245	0.329351	0.0004	0.0296
GO_0048589	developmental growth	24	0.1128	0.241948	0.0013	0.0113176	0.1314	0.142644	0.0012	0.03552
GO_0045190	isotype switching	13	0.2198	0.307859	0.0012	0.0111	0.0755	0.0901129	0.0021	0.03885
GO_0050792	regulation of viral life cycle	8	0.0567	0.231576	0.0046	0.0237488	0.3854	0.387144	0.0017	0.03885
GO_0007043	intercellular junction assembly	11	0.2734	0.35494	0.0017	0.0134786	0.0785	0.0922063	0.0032	0.0546462
GO_0008299	isoprenoid biosynthesis	13	0.4285	0.501989	0.0014	0.0117283	0.044	0.0624153	0.0044	0.06512
GO_0007098	centrosome cycle	12	0.3231	0.400716	0.0027	0.0181636	0.0897	0.101599	0.0053	0.0713091
GO_0006378	mRNA polyadenylation	8	0.4611	0.533147	0.0026	0.0180375	0.0619	0.0778572	0.0075	0.0951429
GO_0009168	purine ribonucleoside monophosphate biosynthesis	13	0.8895	0.901685	0.0014	0.0117283	0.0177	0.0396909	0.0118	0.137754
GO_0009074	aromatic amino acid family catabolism	11	0.6044	0.662601	0.0043	0.0230024	0.0638	0.0794983	0.0149	0.157514
GO_0007026	negative regulation of microtubule depolymerizatio	11	0.9012	0.909393	0.0022	0.01628	0.0238	0.0445866	0.0166	0.171405
GO_0030183	B cell differentiation	33	0.7888	0.81638	0.0033	0.0200712	0.0382	0.0576447	0.0179	0.176613
GO_0016478	negative regulation of translation	9	0.5075	0.576292	0.0085	0.0333982	0.118	0.129044	0.0194	0.183268
GO_0006120	mitochondrial electron transport\, NADH to ubiquin	18	0.838	0.855338	0.002	0.0153103	0.014	0.0361395	0.0252	0.223776
GO_0006094	gluconeogenesis	21	0.4733	0.543011	0.0145	0.049145	0.1725	0.181809	0.0259	0.225482
GO_0030149	sphingolipid catabolism	13	0.0024	0.231576	0.8102	0.825066	0.0149	0.0369587	0.0296	0.252738
GO_0006213	pyrimidine nucleoside metabolism	10	0.5999	0.659296	0.0151	0.0499911	0.1395	0.150701	0.035	0.293208
GO_0006418	tRNA aminoacylation for protein translation	42	0.4384	0.512236	0.0012	0.0111	0.0041	0.02331	0.0393	0.304676
GO_0006760	folic acid and derivative metabolism	11	0.4665	0.53799	0.0013	0.0113176	0.0046	0.0240282	0.0385	0.304676
GO_0006096	glycolysis	49	0.6314	0.682096	0.0023	0.016741	0.0101	0.0303	0.0398	0.304676
GO_0006695	cholesterol biosynthesis	23	0.8255	0.844521	0.0038	0.021357	0.0211	0.0420108	0.0393	0.304676
GO_0008625	induction of apoptosis via death domain receptors	12	0.0097	0.231576	0.9117	0.919988	0.0624	0.0782644	0.0462	0.34137
GO_0006835	dicarboxylic acid transport	12	0.7535	0.789042	0.0151	0.0499911	0.1072	0.118992	0.0469	0.34137
GO_0006783	heme biosynthesis	12	0.803	0.82722	0.0054	0.0257053	0.0257	0.0461976	0.0515	0.368806
GO_0030032	lamellipodium biogenesis	14	0.3875	0.46126	0.0017	0.0134786	0.0046	0.0240282	0.056	0.3885
GO_0006506	GPI anchor biosynthesis	25	0.7484	0.785555	0.0057	0.0260907	0.0239	0.0445866	0.0582	0.396909
GO_0000209	protein polyubiquitination	10	0.6631	0.707732	0.0273	0.074	0.1776	0.186417	0.059	0.396909
GO_0007131	meiotic recombination	17	0.5208	0.585406	0.0031	0.0193859	0.01	0.0302041	0.0618	0.403518
GO_0001909	leukocyte mediated cytotoxicity	7	0.8991	0.90934	0.0091	0.034831	0.0433	0.0620168	0.0611	0.403518
GO_0009408	response to heat	10	0.0031	0.231576	0.4793	0.506689	0.009	0.0296	0.0673	0.433061
GO_0042559	pteridine and derivative biosynthesis	11	0.9941	0.9941	0.0142	0.0488744	0.068	0.0824918	0.0694	0.440194
GO_0006672	ceramide metabolism	27	0.5067	0.576292	0.0039	0.021645	0.0112	0.0318769	0.073	0.456507
GO_0006414	translational elongation	17	0.181	0.27428	0.001	0.0100909	0.0015	0.0170769	0.0769	0.4614
GO_0009225	nucleotide-sugar metabolism	11	0.2771	0.358695	0.0016	0.0131556	0.0032	0.0222	0.075	0.4614
GO_0009070	serine family amino acid biosynthesis	11	0.8637	0.879548	0.0117	0.0429322	0.048	0.0657778	0.076	0.4614
GO_0016197	endosome transport	34	0.3074	0.386645	0.002	0.0153103	0.0041	0.02331	0.079	0.461526
GO_0006563	L-serine metabolism	11	0.6275	0.679537	0.0064	0.0281347	0.0205	0.0417523	0.0784	0.461526
GO_0018279	protein amino acid N-linked glycosylation via aspa	8	0.3786	0.45432	0.0029	0.0189353	0.0065	0.0272264	0.0808	0.465912
GO_0006809	nitric oxide biosynthesis	17	0.0216	0.231576	0.9971	0.9971	0.0894	0.101518	0.0902	0.513446
GO_0006446	regulation of translational initiation	28	0.4494	0.520975	0.005	0.0248835	0.0116	0.0323925	0.0964	0.541792
GO_0007346	regulation of progression through mitotic cell cyc	29	0.2818	0.362664	0.0027	0.0181636	0.0047	0.0242651	0.1023	0.567765
GO_0051130	positive regulation of cell organization and bioge	10	0.5206	0.585406	0.0083	0.0332	0.0196	0.04144	0.1134	0.6216
GO_0050768	negative regulation of neurogenesis	10	0.9874	0.989829	0.035	0.0826596	0.1245	0.135818	0.1197	0.648132
GO_0019835	cytolysis	17	0.6972	0.738799	0.0175	0.0557362	0.0466	0.0642559	0.1287	0.680271
GO_0045446	endothelial cell differentiation	10	0.0461	0.231576	0.9436	0.94787	0.1579	0.168656	0.1331	0.695252
GO_0016358	dendrite development	24	0.6079	0.663164	0.0152	0.0499911	0.0357	0.0552293	0.1381	0.712981
GO_0006739	NADP metabolism	13	0.5845	0.645567	0.0151	0.0499911	0.0338	0.054093	0.1432	0.730814
GO_0009084	glutamine family amino acid biosynthesis	18	0.2099	0.300631	0.0035	0.0204474	0.0041	0.02331	0.1481	0.73408
GO_0007050	cell cycle arrest	72	0.5402	0.601125	0.0135	0.047952	0.0286	0.0484517	0.1455	0.73408
GO_0006958	complement activation\, classical pathway	25	0.0215	0.231576	0.6849	0.707199	0.0523	0.0691107	0.1488	0.73408
GO_0006684	sphingomyelin metabolism	8	0.0999	0.234785	0.7121	0.73019	0.3455	0.349435	0.1529	0.746018
GO_0045946	positive regulation of translation	12	0.0782	0.231576	0.0012	0.0111	0.0008	0.0160333	0.1589	0.758106
GO_0007271	synaptic transmission\, cholinergic	10	0.0252	0.231576	0.6961	0.717096	0.0594	0.0757862	0.1605	0.758106
GO_0030048	actin filament-based movement	19	0.7724	0.801275	0.0302	0.0779581	0.0767	0.0909255	0.1584	0.758106
GO_0042176	regulation of protein catabolism	13	0.0184	0.231576	0.5421	0.565006	0.0355	0.0551119	0.1738	0.803825
GO_0007040	lysosome organization and biogenesis	22	0.024	0.231576	0.6181	0.639712	0.0496	0.0666671	0.1772	0.811101
GO_0006081	aldehyde metabolism	15	0.1719	0.26935	0.0041	0.0224741	0.0039	0.02331	0.1884	0.820094
GO_0006241	CTP biosynthesis	11	0.247	0.329333	0.0065	0.0282941	0.0076	0.0287712	0.1876	0.820094
GO_0006306	DNA methylation	15	0.2965	0.376385	0.0081	0.0326945	0.0106	0.030561	0.1848	0.820094
GO_0030330	DNA damage response\, signal transduction by p53 c	13	0.4228	0.496622	0.0139	0.0488744	0.0222	0.0424862	0.1863	0.820094
GO_0006509	membrane protein ectodomain proteolysis	12	0.7689	0.801176	0.0384	0.0874338	0.0893	0.101518	0.1837	0.820094
GO_0006367	transcription initiation from RNA polymerase II pr	30	0.2124	0.303233	0.0056	0.0259	0.0059	0.026196	0.1928	0.831099
GO_0045639	positive regulation of myeloid cell differentiatio	12	0.0143	0.231576	0.3939	0.427608	0.021	0.042	0.201	0.858115
GO_0006997	nuclear organization and biogenesis	10	0.2266	0.315393	0.007	0.0298846	0.0073	0.0287712	0.2073	0.876583
GO_0042551	neuron maturation	43	0.0234	0.231576	0.5018	0.52796	0.0383	0.0576447	0.214	0.896377
GO_0051092	activation of NF-kappaB transcription factor	10	0.0766	0.231576	0.0022	0.01628	0.0013	0.0160333	0.2253	0.93489
GO_0045767	regulation of anti-apoptosis	11	0.0387	0.231576	0.0011	0.0108533	0.0005	0.0158571	0.23	0.93684
GO_0035088	establishment and/or maintenance of apical/basal c	10	0.2165	0.304196	0.0081	0.0326945	0.0078	0.0287712	0.2321	0.93684
GO_0006700	C21-steroid hormone biosynthesis	10	0.1453	0.254863	0.8186	0.831713	0.3714	0.373927	0.2299	0.93684
GO_0040018	positive regulation of body size	10	0.1232	0.243115	0.0044	0.0232571	0.0031	0.0222	0.2434	0.956368
GO_0001947	heart looping	10	0.3504	0.428588	0.0168	0.0544467	0.0207	0.0419671	0.2408	0.956368
GO_0050715	positive regulation of cytokine secretion	11	0.6658	0.708909	0.0474	0.0985761	0.0858	0.0981835	0.2428	0.956368
GO_0000097	sulfur amino acid biosynthesis	11	0.1226	0.243011	0.0045	0.0235059	0.0031	0.0222	0.2473	0.956723
GO_0007140	male meiosis	10	0.1295	0.243636	0.0048	0.0244966	0.0034	0.0228727	0.2478	0.956723
GO_0009081	branched chain family amino acid metabolism	12	0.0956	0.234347	0.0034	0.020128	0.0021	0.019425	0.2503	0.958045
GO_0006626	protein targeting to mitochondrion	21	0.0295	0.231576	0.001	0.0100909	0.0004	0.0158571	0.2591	0.966893
GO_0006607	NLS-bearing substrate import into nucleus	13	0.0683	0.231576	0.0026	0.0180375	0.0013	0.0160333	0.2632	0.966893
GO_0006635	fatty acid beta-oxidation	18	0.3913	0.464538	0.0226	0.0660158	0.0287	0.0484517	0.2595	0.966893
GO_0006919	caspase activation	28	0.0314	0.231576	0.4766	0.505037	0.0444	0.0627822	0.2635	0.966893
GO_0007031	peroxisome organization and biogenesis	20	0.0756	0.231576	0.003	0.0193043	0.0016	0.01776	0.2692	0.979711
GO_0000184	mRNA catabolism\, nonsense-mediated decay	17	0.0214	0.231576	0.0026	0.0180375	0.0006	0.0160333	0.4735	0.9985
GO_0016573	histone acetylation	12	0.0605	0.231576	0.0028	0.0185552	0.0013	0.0160333	0.2961	0.9985
GO_0006525	arginine metabolism	12	0.0207	0.231576	0.0031	0.0193859	0.0006	0.0160333	0.5173	0.9985
GO_0042354	L-fucose metabolism	11	0.0269	0.231576	0.0033	0.0200712	0.0008	0.0160333	0.4726	0.9985
GO_0006383	transcription from RNA polymerase III promoter	26	0.055	0.231576	0.0034	0.020128	0.0013	0.0160333	0.3383	0.9985
GO_0015012	heparan sulfate proteoglycan biosynthesis	10	0.0366	0.231576	0.0036	0.0204923	0.001	0.0160333	0.426	0.9985
GO_0043406	positive regulation of MAPK activity	52	0.0294	0.231576	0.0051	0.0248835	0.0011	0.0160333	0.5489	0.9985
GO_0008637	apoptotic mitochondrial changes	15	0.015	0.231576	0.0059	0.026196	0.0008	0.0160333	0.7505	0.9985
GO_0030900	forebrain development	49	0.0196	0.231576	0.0058	0.026196	0.0009	0.0160333	0.6757	0.9985
GO_0035113	embryonic appendage morphogenesis	52	0.0196	0.231576	0.0077	0.0322528	0.0011	0.0160333	0.7488	0.9985
GO_0007411	axon guidance	72	0.0204	0.231576	0.0081	0.0326945	0.0012	0.0160333	0.752	0.9985
GO_0007498	mesoderm development	52	0.0145	0.231576	0.0124	0.044761	0.0013	0.0160333	0.9559	0.9985
GO_0030522	intracellular receptor-mediated signaling pathway	51	0.0412	0.231576	0.005	0.0248835	0.0014	0.0168	0.4687	0.9985
GO_0007281	germ cell development	32	0.0783	0.231576	0.0036	0.0204923	0.0018	0.019425	0.2889	0.9985
GO_0006892	post-Golgi vesicle-mediated transport	20	0.0779	0.231576	0.0043	0.0230024	0.0021	0.019425	0.3152	0.9985
GO_0006544	glycine metabolism	12	0.0623	0.231576	0.0055	0.0257053	0.0021	0.019425	0.4003	0.9985
GO_0006406	mRNA export from nucleus	20	0.0379	0.231576	0.0089	0.0346632	0.002	0.019425	0.6138	0.9985
GO_0009311	oligosaccharide metabolism	20	0.0128	0.231576	0.0286	0.0760383	0.0021	0.019425	0.7801	0.9985
GO_0051668	localization within membrane	12	0.0771	0.231576	0.0051	0.0248835	0.0023	0.0200235	0.3438	0.9985
GO_0030865	cortical cytoskeleton organization and biogenesis	11	0.0722	0.231576	0.0054	0.0257053	0.0023	0.0200235	0.3681	0.9985
GO_0035239	tube morphogenesis	69	0.0242	0.231576	0.0175	0.0557362	0.0023	0.0200235	0.9103	0.9985
GO_0006309	DNA fragmentation during apoptosis	13	0.0718	0.231576	0.0059	0.026196	0.0024	0.0204923	0.3842	0.9985
GO_0006206	pyrimidine base metabolism	10	0.0595	0.231576	0.0075	0.0317143	0.0025	0.0209434	0.4698	0.9985
GO_0001764	neuron migration	47	0.0348	0.231576	0.0141	0.0488744	0.0026	0.0213778	0.752	0.9985
GO_0030833	regulation of actin filament polymerization	14	0.0508	0.231576	0.0103	0.0384303	0.0028	0.0222	0.5764	0.9985
GO_0016571	histone methylation	13	0.0546	0.231576	0.0109	0.04033	0.0031	0.0222	0.5717	0.9985
GO_0007015	actin filament organization	42	0.0484	0.231576	0.0131	0.0469065	0.0032	0.0222	0.6443	0.9985
GO_0042036	negative regulation of cytokine biosynthesis	14	0.0412	0.231576	0.016	0.0522353	0.0032	0.0222	0.7381	0.9985
GO_0050821	protein stabilization	10	0.0359	0.231576	0.0177	0.0557362	0.0031	0.0222	0.8034	0.9985
GO_0031279	regulation of cyclase activity	36	0.0298	0.231576	0.0208	0.061568	0.0031	0.0222	0.8984	0.9985
GO_0009743	response to carbohydrate stimulus	11	0.0145	0.231576	0.0393	0.0885746	0.0029	0.0222	0.7265	0.9985
GO_0006354	RNA elongation	13	0.0185	0.231576	0.0362	0.0843832	0.0033	0.0225415	0.8126	0.9985
GO_0006518	peptide metabolism	17	0.104	0.235455	0.0067	0.0288816	0.0036	0.023138	0.3336	0.9985
GO_0016575	histone deacetylation	13	0.0945	0.234347	0.0079	0.0326945	0.0037	0.023138	0.3799	0.9985
GO_0042417	dopamine metabolism	13	0.0395	0.231576	0.0187	0.0564816	0.0035	0.023138	0.7913	0.9985
GO_0043123	positive regulation of I-kappaB kinase/NF-kappaB c	85	0.0281	0.231576	0.0274	0.074	0.0036	0.023138	0.9934	0.9985
GO_0010001	glial cell differentiation	27	0.0285	0.231576	0.0282	0.0754265	0.0037	0.023138	0.9971	0.9985
GO_0030035	microspike biogenesis	10	0.0451	0.231576	0.0194	0.0578094	0.004	0.02331	0.7634	0.9985
GO_0035050	embryonic heart tube development	14	0.0286	0.231576	0.0333	0.0816	0.0042	0.02331	0.9566	0.9985
GO_0000122	negative regulation of transcription from RNA poly	143	0.0154	0.231576	0.0528	0.102821	0.0038	0.02331	0.6618	0.9985
GO_0006071	glycerol metabolism	19	0.1108	0.238812	0.0084	0.0333	0.0044	0.0240282	0.3585	0.9985
GO_0050777	negative regulation of immune response	37	0.03	0.231576	0.0376	0.0864995	0.0048	0.0244966	0.9351	0.9985
GO_0015711	organic anion transport	14	0.0684	0.231576	0.0182	0.0559562	0.0052	0.0248258	0.6342	0.9985
GO_0035023	regulation of Rho protein signal transduction	70	0.0369	0.231576	0.0337	0.0816	0.0051	0.0248258	0.9744	0.9985
GO_0015807	L-amino acid transport	26	0.0326	0.231576	0.037	0.0855625	0.005	0.0248258	0.9643	0.9985
GO_0046330	positive regulation of JNK cascade	9	0.029	0.231576	0.0437	0.0946478	0.0052	0.0248258	0.8824	0.9985
GO_0001822	kidney development	39	0.0242	0.231576	0.0511	0.101486	0.0052	0.0248258	0.7889	0.9985
GO_0007157	heterophilic cell adhesion	25	0.101	0.234785	0.0119	0.0433082	0.0053	0.024975	0.4437	0.9985
GO_0042402	biogenic amine catabolism	12	0.0281	0.231576	0.047	0.0985761	0.0054	0.024975	0.8528	0.9985
GO_0045619	regulation of lymphocyte differentiation	23	0.0553	0.231576	0.0242	0.0693213	0.0055	0.0251753	0.7664	0.9985
GO_0006857	oligopeptide transport	6	0.0403	0.231576	0.0347	0.0826267	0.0056	0.0253714	0.9573	0.9985
GO_0000079	regulation of cyclin-dependent protein kinase acti	42	0.0576	0.231576	0.0267	0.074	0.0061	0.0268158	0.7806	0.9985
GO_0042130	negative regulation of T cell proliferation	9	0.0493	0.231576	0.0324	0.0816	0.0062	0.0269882	0.8792	0.9985
GO_0008630	DNA damage response\, signal transduction resultin	16	0.1551	0.263848	0.0096	0.036122	0.0065	0.0272264	0.3154	0.9985
GO_0006024	glycosaminoglycan biosynthesis	20	0.0729	0.231576	0.023	0.0667451	0.0065	0.0272264	0.6752	0.9985
GO_0006044	N-acetylglucosamine metabolism	23	0.0317	0.231576	0.0522	0.1021	0.0064	0.0272264	0.8564	0.9985
GO_0006595	polyamine metabolism	12	0.0564	0.231576	0.0306	0.0780828	0.0066	0.0273869	0.824	0.9985
GO_0045078	positive regulation of interferon-gamma biosynthes	12	0.0364	0.231576	0.0484	0.0985761	0.0067	0.0275444	0.9179	0.9985
GO_0006342	chromatin silencing	14	0.1776	0.272853	0.0093	0.0352923	0.0072	0.0287712	0.2857	0.9985
GO_0015718	monocarboxylic acid transport	11	0.1422	0.251541	0.014	0.0488744	0.0079	0.0287712	0.3973	0.9985
GO_0015804	neutral amino acid transport	15	0.1068	0.238287	0.018	0.0559562	0.0075	0.0287712	0.5165	0.9985
GO_0051016	barbed-end actin filament capping	21	0.0798	0.231576	0.0274	0.074	0.008	0.0287712	0.696	0.9985
GO_0006000	fructose metabolism	13	0.0598	0.231576	0.0329	0.0816	0.0073	0.0287712	0.8276	0.9985
GO_0006801	superoxide metabolism	21	0.0605	0.231576	0.0348	0.0826267	0.0077	0.0287712	0.84	0.9985
GO_0042698	menstrual cycle	32	0.0525	0.231576	0.0424	0.0927369	0.008	0.0287712	0.9377	0.9985
GO_0045785	positive regulation of cell adhesion	7	0.0455	0.231576	0.0479	0.0985761	0.0079	0.0287712	0.9844	0.9985
GO_0030324	lung development	39	0.0487	0.231576	0.0465	0.0985761	0.0081	0.0287712	0.9861	0.9985
GO_0045058	T cell selection	14	0.0418	0.231576	0.0531	0.102954	0.008	0.0287712	0.93	0.9985
GO_0017015	regulation of transforming growth factor beta rece	13	0.0359	0.231576	0.0571	0.106972	0.0075	0.0287712	0.8655	0.9985
GO_0008016	regulation of heart contraction	41	0.064	0.231576	0.0359	0.0843365	0.0082	0.0288952	0.8317	0.9985
GO_0008360	regulation of cell shape	39	0.0712	0.231576	0.0336	0.0816	0.0085	0.0291481	0.7824	0.9985
GO_0006891	intra-Golgi vesicle-mediated transport	16	0.0536	0.231576	0.0456	0.0973385	0.0086	0.0291481	0.9528	0.9985
GO_0051098	regulation of binding	20	0.0502	0.231576	0.0483	0.0985761	0.0085	0.0291481	0.9887	0.9985
GO_0045670	regulation of osteoclast differentiation	10	0.0252	0.231576	0.0943	0.148154	0.0086	0.0291481	0.6278	0.9985
GO_0042345	regulation of NF-kappaB import into nucleus	14	0.052	0.231576	0.0479	0.0985761	0.0087	0.0292636	0.9762	0.9985
GO_0007292	female gamete generation	35	0.0987	0.234347	0.0261	0.0733443	0.0092	0.0296	0.624	0.9985
GO_0043407	negative regulation of MAPK activity	23	0.0925	0.234347	0.0274	0.074	0.009	0.0296	0.6541	0.9985
GO_0042135	neurotransmitter catabolism	8	0.0533	0.231576	0.0481	0.0985761	0.0089	0.0296	0.97	0.9985
GO_0006904	vesicle docking during exocytosis	20	0.0295	0.231576	0.0891	0.142817	0.0092	0.0296	0.6834	0.9985
GO_0045655	regulation of monocyte differentiation	14	0.0273	0.231576	0.0951	0.148154	0.0092	0.0296	0.6461	0.9985
GO_0045807	positive regulation of endocytosis	17	0.0771	0.231576	0.0363	0.0843832	0.0096	0.0300169	0.7811	0.9985
GO_0042401	biogenic amine biosynthesis	26	0.053	0.231576	0.0522	0.1021	0.0094	0.0300169	0.9951	0.9985
GO_0001763	morphogenesis of a branching structure	42	0.0452	0.231576	0.0614	0.111728	0.0095	0.0300169	0.91	0.9985
GO_0001776	leukocyte homeostasis	16	0.0455	0.231576	0.0622	0.111809	0.0096	0.0300169	0.908	0.9985
GO_0006829	zinc ion transport	13	0.0254	0.231576	0.1082	0.158384	0.0097	0.0301175	0.5921	0.9985
GO_0030888	regulation of B cell proliferation	12	0.0689	0.231576	0.0429	0.0933706	0.0099	0.0302041	0.8609	0.9985
GO_0030225	macrophage differentiation	11	0.0491	0.231576	0.0611	0.11164	0.01	0.0302041	0.9356	0.9985
GO_0001525	angiogenesis	127	0.0434	0.231576	0.067	0.116659	0.0098	0.0302041	0.8724	0.9985
GO_0006470	protein amino acid dephosphorylation	128	0.1573	0.265223	0.0184	0.0559562	0.0105	0.030561	0.427	0.9985
GO_0009880	embryonic pattern specification	37	0.0635	0.231576	0.0511	0.101486	0.0106	0.030561	0.9355	0.9985
GO_0042088	T-helper 1 type immune response	44	0.0371	0.231576	0.0834	0.135622	0.0104	0.030561	0.7642	0.9985
GO_0030514	negative regulation of BMP signaling pathway	11	0.0305	0.231576	0.1006	0.1509	0.0104	0.030561	0.6577	0.9985
GO_0048168	regulation of neuronal synaptic plasticity	12	0.0823	0.234347	0.0403	0.0903697	0.0109	0.0312232	0.7905	0.9985
GO_0009615	response to virus	68	0.1367	0.248749	0.0241	0.0693213	0.0113	0.0319567	0.518	0.9985
GO_0042982	amyloid precursor protein metabolism	12	0.1046	0.235455	0.0338	0.0816	0.0116	0.0323925	0.6732	0.9985
GO_0007219	Notch signaling pathway	41	0.0322	0.231576	0.1105	0.158777	0.0117	0.0324675	0.6453	0.9985
GO_0006968	cellular defense response	109	0.0599	0.231576	0.0622	0.111809	0.0118	0.0325416	0.9885	0.9985
GO_0019735	antimicrobial humoral response (sensu Vertebrata)	78	0.0481	0.231576	0.081	0.133858	0.0123	0.0337111	0.845	0.9985
GO_0042503	tyrosine phosphorylation of Stat3 protein	10	0.2427	0.326811	0.0145	0.049145	0.0131	0.0350386	0.2912	0.9985
GO_0016331	morphogenesis of embryonic epithelium	40	0.1598	0.265584	0.0245	0.0697308	0.0131	0.0350386	0.4818	0.9985
GO_0000080	G1 phase of mitotic cell cycle	20	0.1219	0.242707	0.0333	0.0816	0.013	0.0350386	0.6256	0.9985
GO_0048646	anatomical structure formation	27	0.0759	0.231576	0.0557	0.105687	0.0131	0.0350386	0.9077	0.9985
GO_0021915	neural tube development	28	0.1327	0.246708	0.0308	0.078144	0.0132	0.0350946	0.5829	0.9985
GO_0006944	membrane fusion	35	0.1002	0.234785	0.044	0.094835	0.0136	0.0353123	0.7564	0.9985
GO_0007187	G-protein signaling\, coupled to cyclic nucleotide	107	0.0712	0.231576	0.0622	0.111809	0.0135	0.0353123	0.9597	0.9985
GO_0030534	adult behavior	27	0.0614	0.231576	0.0724	0.123637	0.0136	0.0353123	0.9507	0.9985
GO_0030335	positive regulation of cell migration	12	0.032	0.231576	0.133	0.181771	0.0136	0.0353123	0.5912	0.9985
GO_0007034	vacuolar transport	12	0.1103	0.238812	0.0415	0.09213	0.0141	0.0361873	0.7119	0.9985
GO_0007605	sensory perception of sound	121	0.1357	0.248128	0.034	0.0816	0.0145	0.0365795	0.601	0.9985
GO_0042102	positive regulation of T cell proliferation	26	0.0773	0.231576	0.0627	0.112253	0.0145	0.0365795	0.9368	0.9985
GO_0048066	pigmentation during development	17	0.0719	0.231576	0.0669	0.116659	0.0144	0.0365795	0.9781	0.9985
GO_0043112	receptor metabolism	11	0.0981	0.234347	0.0496	0.0998498	0.0147	0.0366674	0.7964	0.9985
GO_0045638	negative regulation of myeloid cell differentiatio	13	0.0266	0.231576	0.1703	0.214202	0.0147	0.0366674	0.483	0.9985
GO_0019722	calcium-mediated signaling	33	0.0934	0.234347	0.0538	0.103408	0.015	0.037	0.8339	0.9985
GO_0008585	female gonad development	33	0.2134	0.303685	0.0212	0.0623364	0.0152	0.0370813	0.382	0.9985
GO_0006493	protein amino acid O-linked glycosylation	24	0.2462	0.329255	0.0184	0.0559562	0.0157	0.0377519	0.3256	0.9985
GO_0009065	glutamine family amino acid catabolism	13	0.1705	0.26935	0.029	0.0766429	0.0156	0.0377519	0.5011	0.9985
GO_0007009	plasma membrane organization and biogenesis	16	0.0955	0.234347	0.0569	0.106972	0.0159	0.0377519	0.8439	0.9985
GO_0030195	negative regulation of blood coagulation	11	0.0903	0.234347	0.0605	0.111461	0.0159	0.0377519	0.8787	0.9985
GO_0045444	fat cell differentiation	21	0.0713	0.231576	0.0771	0.130161	0.016	0.0377872	0.9762	0.9985
GO_0007229	integrin-mediated signaling pathway	58	0.1902	0.281151	0.0275	0.074	0.0166	0.0385885	0.4612	0.9985
GO_0042475	odontogenesis (sensu Vertebrata)	26	0.0742	0.231576	0.0786	0.131692	0.0167	0.0386188	0.9826	0.9985
GO_0042303	molting cycle	23	0.0844	0.234347	0.0718	0.123563	0.0173	0.0395938	0.9505	0.9985
GO_0006641	triacylglycerol metabolism	14	0.0555	0.231576	0.1088	0.158384	0.0173	0.0395938	0.7966	0.9985
GO_0009067	aspartate family amino acid biosynthesis	10	0.2835	0.363798	0.0177	0.0557362	0.0175	0.0396909	0.2903	0.9985
GO_0035282	segmentation	34	0.1177	0.242707	0.0519	0.1021	0.0176	0.0396909	0.7535	0.9985
GO_0007611	learning and/or memory	55	0.064	0.231576	0.0973	0.149485	0.0177	0.0396909	0.8726	0.9985
GO_0007030	Golgi organization and biogenesis	11	0.0632	0.231576	0.1006	0.1509	0.018	0.0401608	0.8584	0.9985
GO_0006516	glycoprotein catabolism	16	0.0975	0.234347	0.066	0.115826	0.0181	0.040182	0.8808	0.9985
GO_0007585	respiratory gaseous exchange	27	0.1173	0.242707	0.0547	0.104235	0.0182	0.040203	0.7693	0.9985
GO_0046839	phospholipid dephosphorylation	16	0.2937	0.375801	0.0184	0.0559562	0.0186	0.0404824	0.2888	0.9985
GO_0006183	GTP biosynthesis	11	0.0962	0.234347	0.069	0.119672	0.0186	0.0404824	0.8983	0.9985
GO_0001649	osteoblast differentiation	19	0.0734	0.231576	0.0918	0.14609	0.0187	0.0405015	0.9314	0.9985
GO_0001570	vasculogenesis	21	0.2093	0.300631	0.0293	0.0769775	0.0189	0.0407359	0.45	0.9985
GO_0007224	smoothened signaling pathway	21	0.0694	0.231576	0.0987	0.149661	0.019	0.0407536	0.8921	0.9985
GO_0046883	regulation of hormone secretion	12	0.0491	0.231576	0.139	0.186453	0.0193	0.0411981	0.6882	0.9985
GO_0006826	iron ion transport	20	0.2367	0.32207	0.0263	0.0734415	0.0195	0.0414258	0.3973	0.9985
GO_0050906	detection of stimulus during sensory perception	10	0.1652	0.266723	0.042	0.0927369	0.0199	0.0416774	0.5968	0.9985
GO_0050729	positive regulation of inflammatory response	9	0.0828	0.234347	0.088	0.141565	0.0199	0.0416774	0.9813	0.9985
GO_0008645	hexose transport	26	0.1679	0.268157	0.0414	0.09213	0.02	0.0416901	0.5889	0.9985
GO_0030168	platelet activation	17	0.2593	0.339007	0.025	0.0707006	0.0205	0.0417523	0.366	0.9985
GO_0015893	drug transport	11	0.0779	0.231576	0.0959	0.148154	0.0203	0.0417523	0.9357	0.9985
GO_0030178	negative regulation of Wnt receptor signaling path	14	0.079	0.231576	0.0947	0.148154	0.0203	0.0417523	0.944	0.9985
GO_0030855	epithelial cell differentiation	37	0.066	0.231576	0.1136	0.161946	0.0205	0.0417523	0.8335	0.9985
GO_0045944	positive regulation of transcription from RNA poly	146	0.1867	0.279107	0.0386	0.0874408	0.0209	0.0419891	0.5418	0.9985
GO_0001709	cell fate determination	27	0.0646	0.231576	0.1188	0.167451	0.0209	0.0419891	0.8134	0.9985
GO_0008088	axon cargo transport	13	0.2358	0.32207	0.0301	0.0779581	0.0214	0.0420734	0.4245	0.9985
GO_0030218	erythrocyte differentiation	27	0.1577	0.265223	0.0497	0.0998498	0.0217	0.0420734	0.6537	0.9985
GO_0006898	receptor-mediated endocytosis	41	0.1251	0.243539	0.0642	0.113114	0.0217	0.0420734	0.7951	0.9985
GO_0006228	UTP biosynthesis	10	0.0883	0.234347	0.0903	0.14422	0.0214	0.0420734	0.9931	0.9985
GO_0042136	neurotransmitter biosynthesis	14	0.0852	0.234347	0.0956	0.148154	0.0217	0.0420734	0.9643	0.9985
GO_0006805	xenobiotic metabolism	23	0.0259	0.231576	0.268	0.305905	0.0217	0.0420734	0.3648	0.9985
GO_0030902	hindbrain development	16	0.1614	0.265584	0.0497	0.0998498	0.0221	0.0424779	0.6465	0.9985
GO_0006334	nucleosome assembly	80	0.09	0.234347	0.0948	0.148154	0.0226	0.0428821	0.9839	0.9985
GO_0006816	calcium ion transport	93	0.0658	0.231576	0.1331	0.181771	0.0233	0.0440221	0.7833	0.9985
GO_0019216	regulation of lipid metabolism	23	0.141	0.251422	0.0631	0.112421	0.0236	0.0444	0.7529	0.9985
GO_0048663	neuron fate commitment	17	0.0979	0.234347	0.095	0.148154	0.0241	0.0447715	0.9906	0.9985
GO_0006814	sodium ion transport	104	0.0859	0.234347	0.1099	0.158427	0.0244	0.0449504	0.9229	0.9985
GO_0050832	defense response to fungus	11	0.0614	0.231576	0.1507	0.19908	0.0245	0.0449504	0.7248	0.9985
GO_0006953	acute-phase response	25	0.0494	0.231576	0.1816	0.221512	0.0244	0.0449504	0.6101	0.9985
GO_0051260	protein homooligomerization	31	0.1214	0.242707	0.0786	0.131692	0.0247	0.0451309	0.8644	0.9985
GO_0006909	phagocytosis	30	0.1194	0.242707	0.082	0.134347	0.0252	0.0458557	0.8825	0.9985
GO_0007595	lactation	14	0.1788	0.273749	0.0535	0.103278	0.0255	0.0460244	0.6353	0.9985
GO_0006471	protein amino acid ADP-ribosylation	33	0.1034	0.235455	0.0961	0.148154	0.0254	0.0460244	0.9767	0.9985
GO_0007200	G-protein signaling\, coupled to IP3 second messen	69	0.167	0.267682	0.0595	0.110075	0.0261	0.0467274	0.6841	0.9985
GO_0008366	axon ensheathment	29	0.057	0.231576	0.1764	0.218053	0.0264	0.0470747	0.6556	0.9985
GO_0019370	leukotriene biosynthesis	14	0.1264	0.243539	0.084	0.135622	0.0269	0.0477744	0.8719	0.9985
GO_0051291	protein heterooligomerization	6	0.258	0.339007	0.0383	0.0874338	0.0277	0.0482156	0.4505	0.9985
GO_0006888	ER to Golgi vesicle-mediated transport	69	0.1803	0.274155	0.0593	0.110075	0.0278	0.0482156	0.6599	0.9985
GO_0030308	negative regulation of cell growth	35	0.1328	0.246708	0.0835	0.135622	0.0278	0.0482156	0.8542	0.9985
GO_0006536	glutamate metabolism	9	0.1083	0.238812	0.1013	0.15093	0.0275	0.0482156	0.9789	0.9985
GO_0016236	macroautophagy	10	0.0708	0.231576	0.1518	0.19908	0.0274	0.0482156	0.7629	0.9985
GO_0009166	nucleotide catabolism	19	0.3162	0.394362	0.0306	0.0780828	0.0286	0.0484517	0.3552	0.9985
GO_0019221	cytokine and chemokine mediated signaling pathway	35	0.2083	0.300631	0.0512	0.101486	0.0282	0.0484517	0.5784	0.9985
GO_0030010	establishment of cell polarity	9	0.1803	0.274155	0.0608	0.11155	0.0283	0.0484517	0.6663	0.9985
GO_0016338	calcium-independent cell-cell adhesion	21	0.1503	0.258656	0.0754	0.127777	0.0285	0.0484517	0.7845	0.9985
GO_0007405	neuroblast proliferation	14	0.1453	0.254863	0.079	0.131865	0.0287	0.0484517	0.8085	0.9985
GO_0007162	negative regulation of cell adhesion	17	0.2424	0.326811	0.0452	0.0969507	0.0295	0.0490562	0.504	0.9985
GO_0045086	positive regulation of interleukin-2 biosynthesis	10	0.1151	0.242622	0.1045	0.15466	0.0295	0.0490562	0.9692	0.9985
GO_0008277	regulation of G-protein coupled receptor protein s	35	0.09	0.234347	0.1325	0.181771	0.0295	0.0490562	0.8776	0.9985
GO_0008272	sulfate transport	11	0.0774	0.231576	0.1517	0.19908	0.0293	0.0490562	0.7889	0.9985
GO_0001539	ciliary or flagellar motility	9	0.0924	0.234347	0.1303	0.180228	0.0297	0.0492045	0.8911	0.9985
GO_0000060	protein import into nucleus\, translocation	18	0.1282	0.243539	0.098	0.149526	0.0307	0.050462	0.9145	0.9985
GO_0016998	cell wall catabolism	12	0.1146	0.242622	0.1099	0.158427	0.0307	0.050462	0.9866	0.9985
GO_0001759	induction of an organ	11	0.0842	0.234347	0.149	0.198072	0.0308	0.050462	0.8196	0.9985
GO_0009132	nucleoside diphosphate metabolism	11	0.2506	0.332139	0.0484	0.0985761	0.032	0.0522353	0.5105	0.9985
GO_0042509	regulation of tyrosine phosphorylation of STAT pro	13	0.1902	0.281151	0.0713	0.12318	0.0334	0.0540873	0.6933	0.9985
GO_0006813	potassium ion transport	138	0.1035	0.235455	0.1346	0.181771	0.0333	0.0540873	0.9158	0.9985
GO_0048305	immunoglobulin secretion	10	0.043	0.231576	0.289	0.324851	0.0335	0.0540873	0.4443	0.9985
GO_0031589	cell-substrate adhesion	77	0.1731	0.26935	0.0809	0.133858	0.0339	0.054093	0.7595	0.9985
GO_0007156	homophilic cell adhesion	100	0.1458	0.254863	0.0991	0.149661	0.0343	0.054093	0.8764	0.9985
GO_0001755	neural crest cell migration	17	0.1339	0.247608	0.1085	0.158384	0.0343	0.054093	0.9324	0.9985
GO_0019233	sensory perception of pain	13	0.1271	0.243539	0.1155	0.16384	0.0346	0.054093	0.9692	0.9985
GO_0001708	cell fate specification	20	0.1201	0.242707	0.1192	0.167484	0.0339	0.054093	0.9975	0.9985
GO_0046777	protein amino acid autophosphorylation	41	0.1203	0.242707	0.1213	0.168304	0.0344	0.054093	0.9975	0.9985
GO_0007566	embryo implantation	12	0.1097	0.238812	0.1331	0.181771	0.0345	0.054093	0.9378	0.9985
GO_0001659	thermoregulation	10	0.0795	0.231576	0.1768	0.218053	0.034	0.054093	0.7474	0.9985
GO_0051262	protein tetramerization	17	0.3639	0.44025	0.0331	0.0816	0.0348	0.0542147	0.3346	0.9985
GO_0006836	neurotransmitter transport	41	0.0668	0.231576	0.2283	0.269588	0.0372	0.05735	0.6177	0.9985
GO_0006706	steroid catabolism	11	0.1735	0.26935	0.0949	0.148154	0.0383	0.0576447	0.806	0.9985
GO_0048595	eye morphogenesis (sensu Mammalia)	9	0.148	0.25638	0.112	0.160413	0.0382	0.0576447	0.9098	0.9985
GO_0030593	neutrophil chemotaxis	12	0.1242	0.243124	0.1337	0.181771	0.0382	0.0576447	0.9761	0.9985
GO_0007589	fluid secretion	10	0.1023	0.235455	0.1602	0.204982	0.038	0.0576447	0.8552	0.9985
GO_0030005	di-\, tri-valent inorganic cation homeostasis	130	0.101	0.234785	0.1625	0.206734	0.0381	0.0576447	0.8465	0.9985
GO_0030336	negative regulation of cell migration	14	0.1392	0.251239	0.1208	0.168304	0.0386	0.0579	0.9541	0.9985
GO_0007169	transmembrane receptor protein tyrosine kinase sig	168	0.1262	0.243539	0.1351	0.181771	0.039	0.058303	0.9778	0.9985
GO_0032147	activation of protein kinase activity	50	0.3472	0.425848	0.0424	0.0927369	0.0395	0.0588523	0.3917	0.9985
GO_0042593	glucose homeostasis	16	0.117	0.242707	0.1507	0.19908	0.0401	0.0595465	0.9176	0.9985
GO_0006875	metal ion homeostasis	138	0.1102	0.238812	0.1609	0.205286	0.0404	0.059792	0.8768	0.9985
GO_0030879	mammary gland development	9	0.0619	0.231576	0.2681	0.305905	0.0407	0.0600359	0.5486	0.9985
GO_0007631	feeding behavior	36	0.1153	0.242622	0.1573	0.203027	0.0411	0.0604252	0.8988	0.9985
GO_0007269	neurotransmitter secretion	37	0.1844	0.277839	0.0978	0.149526	0.0413	0.0605188	0.795	0.9985
GO_0000270	peptidoglycan metabolism	27	0.0809	0.233244	0.2208	0.262829	0.0417	0.0609039	0.6803	0.9985
GO_0030199	collagen fibril organization	11	0.165	0.266723	0.1138	0.161946	0.0423	0.0615777	0.8787	0.9985
GO_0006749	glutathione metabolism	12	0.1723	0.26935	0.1099	0.158427	0.0427	0.061755	0.8535	0.9985
GO_0001666	response to hypoxia	21	0.0945	0.234347	0.1976	0.237763	0.0426	0.061755	0.7618	0.9985
GO_0007601	visual perception	183	0.1595	0.265584	0.1203	0.168304	0.0429	0.0617864	0.9078	0.9985
GO_0006890	retrograde vesicle-mediated transport\, Golgi to E	11	0.046	0.231576	0.3565	0.389867	0.043	0.0617864	0.4005	0.9985
GO_0030162	regulation of proteolysis	16	0.1096	0.238812	0.1773	0.218064	0.0436	0.0622457	0.843	0.9985
GO_0030216	keratinocyte differentiation	29	0.0695	0.231576	0.2654	0.30449	0.0439	0.0624153	0.581	0.9985
GO_0046395	carboxylic acid catabolism	9	0.1418	0.251541	0.1425	0.190572	0.0447	0.0628063	0.9985	0.9985
GO_0048489	synaptic vesicle transport	20	0.1285	0.243539	0.1568	0.202971	0.0446	0.0628063	0.9344	0.9985
GO_0007422	peripheral nervous system development	25	0.1214	0.242707	0.1671	0.211374	0.0449	0.0628883	0.8951	0.9985
GO_0050679	positive regulation of epithelial cell proliferati	12	0.1358	0.248128	0.152	0.19908	0.0454	0.06319	0.9627	0.9985
GO_0007218	neuropeptide signaling pathway	77	0.1289	0.243539	0.1599	0.204982	0.0454	0.06319	0.9288	0.9985
GO_0035272	exocrine system development	11	0.1405	0.251422	0.1483	0.197733	0.0458	0.0635475	0.9821	0.9985
GO_0007492	endoderm development	11	0.0978	0.234347	0.2126	0.254432	0.0466	0.0642559	0.7475	0.9985
GO_0015986	ATP synthesis coupled proton transport	31	0.3867	0.46126	0.0483	0.0985761	0.0482	0.0658486	0.3877	0.9985
GO_0007584	response to nutrient	13	0.3222	0.400716	0.0633	0.112421	0.049	0.0663293	0.4983	0.9985
GO_0045103	intermediate filament-based process	10	0.1854	0.2781	0.1211	0.168304	0.0489	0.0663293	0.8591	0.9985
GO_0018149	peptide cross-linking	16	0.0878	0.234347	0.2467	0.285247	0.0488	0.0663293	0.6668	0.9985
GO_0042472	inner ear morphogenesis	34	0.0912	0.234347	0.2435	0.283021	0.0497	0.0666671	0.6822	0.9985
GO_0042742	defense response to bacterium	66	0.0454	0.231576	0.416	0.44507	0.0497	0.0666671	0.3563	0.9985
GO_0042491	auditory receptor cell differentiation	10	0.0962	0.234347	0.2338	0.273411	0.0499	0.0667337	0.711	0.9985
GO_0030574	collagen catabolism	17	0.0853	0.234347	0.2625	0.301943	0.0505	0.0673333	0.6386	0.9985
GO_0016339	calcium-dependent cell-cell adhesion	21	0.139	0.251239	0.172	0.215121	0.0512	0.0680623	0.9288	0.9985
GO_0032012	regulation of ARF protein signal transduction	16	0.2371	0.32207	0.0988	0.149661	0.0515	0.0682567	0.7139	0.9985
GO_0008210	estrogen metabolism	9	0.1591	0.265584	0.1562	0.202786	0.0527	0.0692272	0.9939	0.9985
GO_0007617	mating behavior	12	0.105	0.235455	0.2308	0.271818	0.0527	0.0692272	0.741	0.9985
GO_0030516	regulation of axon extension	12	0.1404	0.251422	0.1779	0.218198	0.053	0.0694159	0.9207	0.9985
GO_0043269	regulation of ion transport	9	0.0544	0.231576	0.3976	0.429524	0.0539	0.0703871	0.4034	0.9985
GO_0008209	androgen metabolism	10	0.1563	0.264875	0.1645	0.20868	0.0542	0.0704947	0.983	0.9985
GO_0045665	negative regulation of neuron differentiation	12	0.0543	0.231576	0.4011	0.432253	0.0543	0.0704947	0.4006	0.9985
GO_0006869	lipid transport	68	0.2372	0.32207	0.107	0.157834	0.0548	0.0709364	0.7373	0.9985
GO_0030433	ER-associated protein catabolism	16	0.2948	0.376124	0.084	0.135622	0.0555	0.0716337	0.5964	0.9985
GO_0009566	fertilization	47	0.1617	0.265584	0.1768	0.218053	0.059	0.0754928	0.9699	0.9985
GO_0030901	midbrain development	10	0.1528	0.261943	0.1865	0.226246	0.0589	0.0754928	0.9325	0.9985
GO_0006957	complement activation\, alternative pathway	12	0.1281	0.243539	0.2246	0.266637	0.06	0.0763324	0.8111	0.9985
GO_0008037	cell recognition	19	0.3683	0.444362	0.0721	0.1236	0.0612	0.0771955	0.4874	0.9985
GO_0019363	pyridine nucleotide biosynthesis	12	0.2483	0.330075	0.1176	0.166288	0.0612	0.0771955	0.7498	0.9985
GO_0017157	regulation of exocytosis	16	0.1535	0.262131	0.1936	0.233583	0.061	0.0771955	0.9213	0.9985
GO_0042384	cilium biogenesis	9	0.2265	0.315393	0.135	0.181771	0.0629	0.0786693	0.8247	0.9985
GO_0042632	cholesterol homeostasis	13	0.2058	0.299591	0.1532	0.200061	0.0641	0.0794983	0.8993	0.9985
GO_0031016	pancreas development	9	0.0968	0.234347	0.3074	0.343792	0.064	0.0794983	0.6206	0.9985
GO_0030073	insulin secretion	15	0.1145	0.242622	0.2721	0.307411	0.065	0.08039	0.7101	0.9985
GO_0031424	keratinization	18	0.1344	0.247608	0.2375	0.276772	0.0653	0.0805367	0.8069	0.9985
GO_0009612	response to mechanical stimulus	15	0.3636	0.44025	0.0812	0.133858	0.0658	0.0809285	0.5196	0.9985
GO_0008206	bile acid metabolism	15	0.1968	0.28838	0.1683	0.212287	0.0665	0.0815635	0.9464	0.9985
GO_0006688	glycosphingolipid biosynthesis	10	0.3068	0.386645	0.1026	0.152356	0.0667	0.0815835	0.6372	0.9985
GO_0046851	negative regulation of bone remodeling	9	0.1197	0.242707	0.2707	0.307393	0.0669	0.0816033	0.7253	0.9985
GO_0048565	gut development	11	0.1478	0.25638	0.2271	0.268886	0.0676	0.0822312	0.853	0.9985
GO_0006586	indolalkylamine metabolism	9	0.2042	0.298239	0.1755	0.218053	0.0709	0.0855424	0.9476	0.9985
GO_0050909	sensory perception of taste	15	0.1906	0.281151	0.1881	0.227565	0.0709	0.0855424	0.9955	0.9985
GO_0017156	calcium ion-dependent exocytosis	15	0.1662	0.267365	0.218	0.260194	0.0717	0.0862732	0.9063	0.9985
GO_0016045	detection of bacterium	10	0.0942	0.234347	0.3637	0.396764	0.0733	0.08796	0.5568	0.9985
GO_0045454	cell redox homeostasis	14	0.2093	0.300631	0.1808	0.221144	0.0741	0.0886803	0.9491	0.9985
GO_0006817	phosphate transport	78	0.1243	0.243124	0.304	0.340848	0.0763	0.0908236	0.6959	0.9985
GO_0030239	myofibril assembly	10	0.3628	0.44025	0.1011	0.15093	0.077	0.0909255	0.576	0.9985
GO_0015671	oxygen transport	10	0.2279	0.316211	0.1732	0.216013	0.0768	0.0909255	0.9044	0.9985
GO_0006940	regulation of smooth muscle contraction	13	0.1726	0.26935	0.234	0.273411	0.0783	0.0922063	0.8938	0.9985
GO_0030317	sperm motility	13	0.2587	0.339007	0.1598	0.204982	0.0803	0.0938242	0.8322	0.9985
GO_0051350	negative regulation of lyase activity	14	0.4756	0.544243	0.0749	0.127416	0.081	0.0943937	0.4162	0.9985
GO_0006825	copper ion transport	8	0.5317	0.594647	0.0638	0.112857	0.0814	0.0946115	0.3511	0.9985
GO_0006547	histidine metabolism	10	0.5735	0.634998	0.0586	0.109321	0.0835	0.0965469	0.3146	0.9985
GO_0044247	cellular polysaccharide catabolism	13	0.5895	0.649474	0.057	0.106972	0.0845	0.0971969	0.3026	0.9985
GO_0050852	T cell receptor signaling pathway	13	0.1751	0.270886	0.2524	0.291079	0.0844	0.0971969	0.8714	0.9985
GO_0015988	energy coupled proton transport\, against electroc	10	0.1627	0.265584	0.2717	0.307411	0.0848	0.0972899	0.8201	0.9985
GO_0006903	vesicle targeting	11	0.2967	0.376385	0.1538	0.200256	0.0877	0.1001	0.7699	0.9985
GO_0006570	tyrosine metabolism	12	0.4069	0.479214	0.1088	0.158384	0.0905	0.102244	0.5561	0.9985
GO_0050731	positive regulation of peptidyl-tyrosine phosphory	20	0.2429	0.326811	0.2041	0.24492	0.0923	0.104013	0.9379	0.9985
GO_0006182	cGMP biosynthesis	11	0.1168	0.242707	0.3974	0.429524	0.0932	0.104762	0.5832	0.9985
GO_0030500	regulation of bone mineralization	13	0.1624	0.265584	0.317	0.352752	0.0969	0.108645	0.7631	0.9985
GO_0007215	glutamate signaling pathway	21	0.1031	0.235455	0.4761	0.505037	0.1016	0.113343	0.4882	0.9985
GO_0007602	phototransduction	26	0.0963	0.234347	0.5054	0.530491	0.1028	0.114394	0.4519	0.9985
GO_0006821	chloride transport	45	0.2296	0.317578	0.2687	0.305905	0.1102	0.122017	0.9424	0.9985
GO_0007286	spermatid development	32	0.3338	0.411687	0.1864	0.226246	0.1126	0.124364	0.7886	0.9985
GO_0007416	synaptogenesis	28	0.6241	0.677507	0.0814	0.133858	0.1147	0.126276	0.3489	0.9985
GO_0042462	eye photoreceptor cell development	11	0.1939	0.285072	0.3301	0.363683	0.1149	0.126276	0.806	0.9985
GO_0019882	antigen processing and presentation	25	0.1643	0.266723	0.3878	0.422018	0.1171	0.128376	0.6912	0.9985
GO_0050879	organismal movement	15	0.1093	0.238812	0.5802	0.60189	0.1297	0.141144	0.434	0.9985
GO_0006929	substrate-bound cell migration	10	0.1901	0.281151	0.4121	0.441962	0.1379	0.149336	0.7137	0.9985
GO_0009755	hormone-mediated signaling	11	0.3042	0.3848	0.2751	0.310011	0.1412	0.152167	0.9619	0.9985
GO_0050728	negative regulation of inflammatory response	8	0.1484	0.25638	0.5238	0.547217	0.1447	0.155561	0.5472	0.9985
GO_0007214	gamma-aminobutyric acid signaling pathway	14	0.2587	0.339007	0.347	0.380415	0.1502	0.161084	0.8877	0.9985
GO_0001935	endothelial cell proliferation	10	0.516	0.582962	0.1717	0.215121	0.1582	0.168656	0.5941	0.9985
GO_0009593	detection of chemical stimulus	9	0.2143	0.303991	0.438	0.467481	0.1595	0.169421	0.7286	0.9985
GO_0042542	response to hydrogen peroxide	10	0.3953	0.468035	0.2445	0.283441	0.1608	0.170394	0.8154	0.9985
GO_0030004	monovalent inorganic cation homeostasis	14	0.1693	0.26935	0.5617	0.584063	0.1702	0.179926	0.5566	0.9985
GO_0051180	vitamin transport	12	0.331	0.40937	0.3241	0.358854	0.1728	0.181809	0.9918	0.9985
GO_0001516	prostaglandin biosynthesis	8	0.3437	0.422722	0.3289	0.363263	0.1804	0.188909	0.9826	0.9985
GO_0043408	regulation of MAPKKK cascade	10	0.4697	0.540277	0.2333	0.273411	0.181	0.189092	0.7284	0.9985
GO_0051181	cofactor transport	10	0.3581	0.436803	0.3228	0.358308	0.1838	0.191566	0.9588	0.9985
GO_0001502	cartilage condensation	14	0.1322	0.246708	0.7363	0.753265	0.1913	0.198916	0.391	0.9985
GO_0007212	dopamine receptor signaling pathway	10	0.2328	0.321004	0.5102	0.534266	0.1951	0.202393	0.6931	0.9985
GO_0006776	vitamin A metabolism	16	0.3759	0.452302	0.3393	0.372894	0.1992	0.206165	0.9587	0.9985
GO_0007569	cell aging	8	0.1189	0.242707	0.8284	0.837835	0.2049	0.211571	0.3269	0.9985
GO_0018298	protein-chromophore linkage	9	0.2596	0.339007	0.5006	0.527949	0.2078	0.214068	0.7382	0.9985
GO_0007530	sex determination	18	0.2462	0.329255	0.7047	0.724275	0.2777	0.285414	0.5704	0.9985
GO_0050772	positive regulation of axonogenesis	13	0.6132	0.667306	0.3095	0.345271	0.2849	0.292138	0.7102	0.9985
GO_0030968	unfolded protein response	14	0.2155	0.304196	0.8208	0.832044	0.2983	0.305173	0.464	0.9985
GO_0001523	retinoid metabolism	11	0.5142	0.58241	0.4095	0.440237	0.3005	0.306717	0.9002	0.9985
GO_0008584	male gonad development	18	0.525	0.588636	0.4427	0.471364	0.3249	0.329351	0.9237	0.9985
GO_0045408	regulation of interleukin-6 biosynthesis	10	0.2095	0.300631	0.9702	0.97239	0.3552	0.358429	0.3822	0.9985
GO_0051085	chaperone cofactor-dependent protein folding	9	0.3851	0.460874	0.7522	0.767763	0.6911	0.69266	0.4033	0.9985
GO_0007586	digestion	62	0.7367	0.775106	0.9401	0.946495	0.8533	0.8533	0.7711	0.9985
